# Supplementary material
Source: PubMed Central journal article supplement (PMC10156642)
Supplement: mmc1.pdf [file mmc1.pdf]

Korvink M, Gunn LH, Molina G, Hackner D, Martin, J (Manuscript submitted for publication). A Novel Approach to Developing Disease and Outcome Specific Social Risk Indices. American Journal of Preventive Medicine

Appendix Figure 1: Difference in DOS-SVI and SVI County Percentiles by Cohort

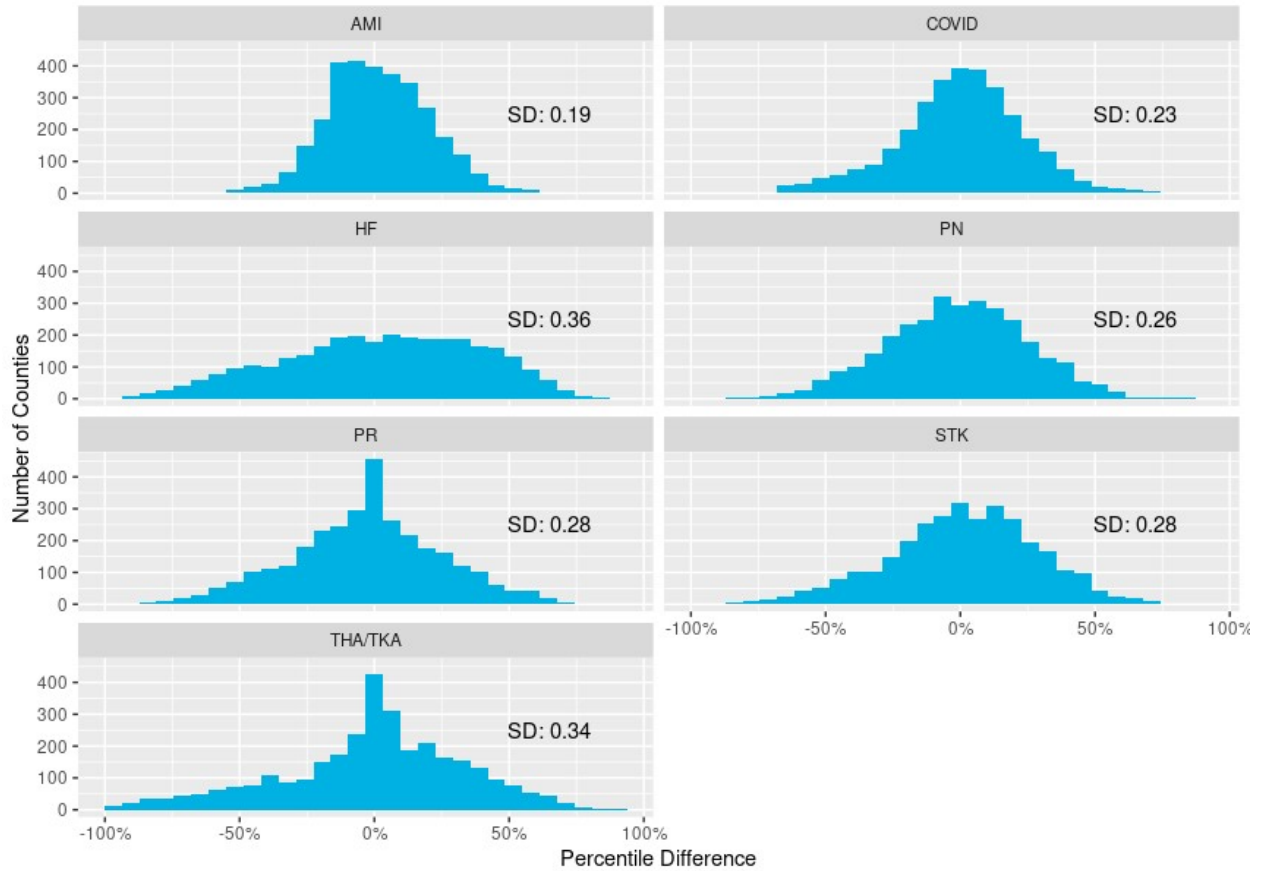

AMI = Acute Myocardial Infarction; COVID = Coronavirus-19; HF = Heart Failure; PR = Perinatal and Related Conditions; PN = Pneumonia; STK = Stroke; THA/TKA = Total Hip and Knee Arthroplasty

Appendix Figure 2: Cumulative Percentage of Variance Explained by Principal Component

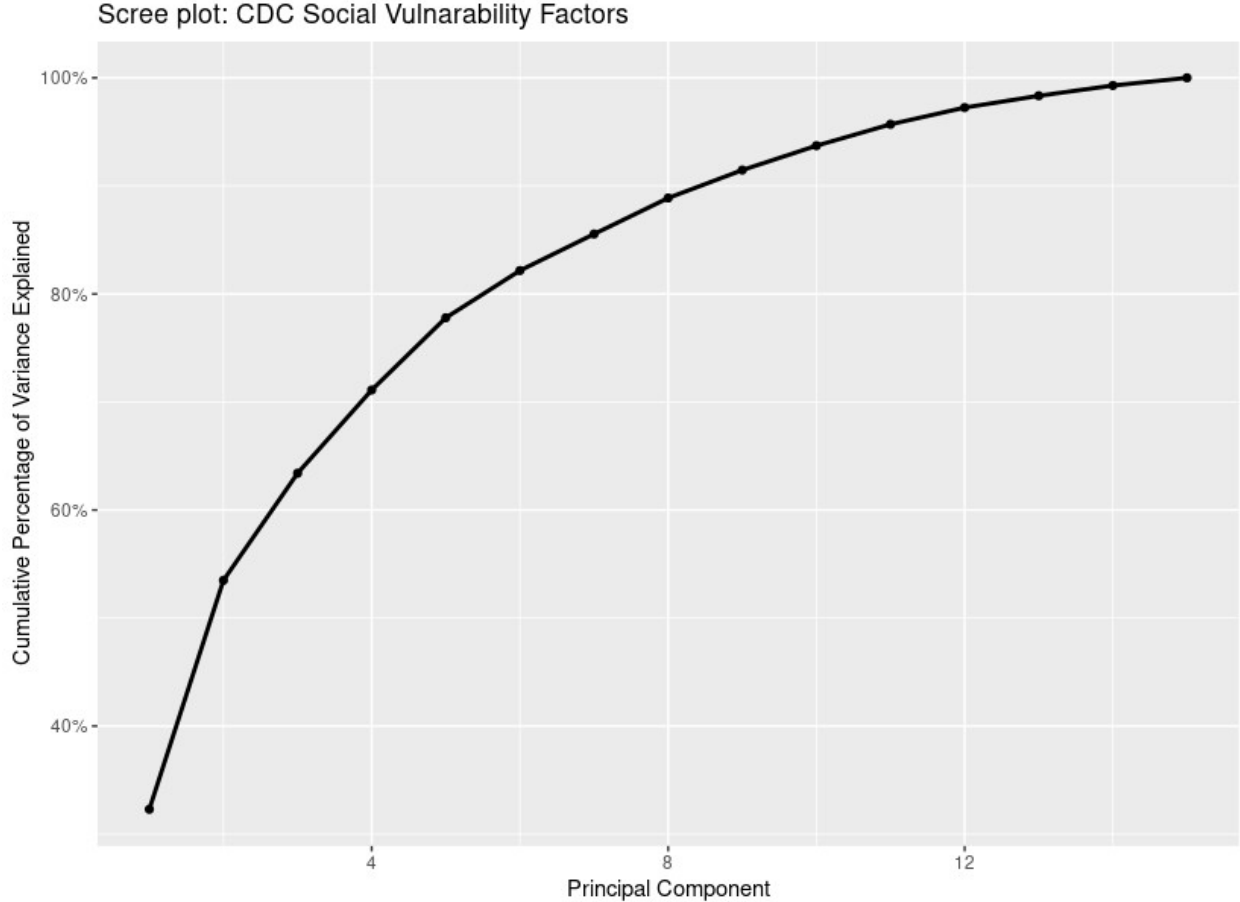

Appendix Figure 3: Correlation between SVI Variables and Principal Components

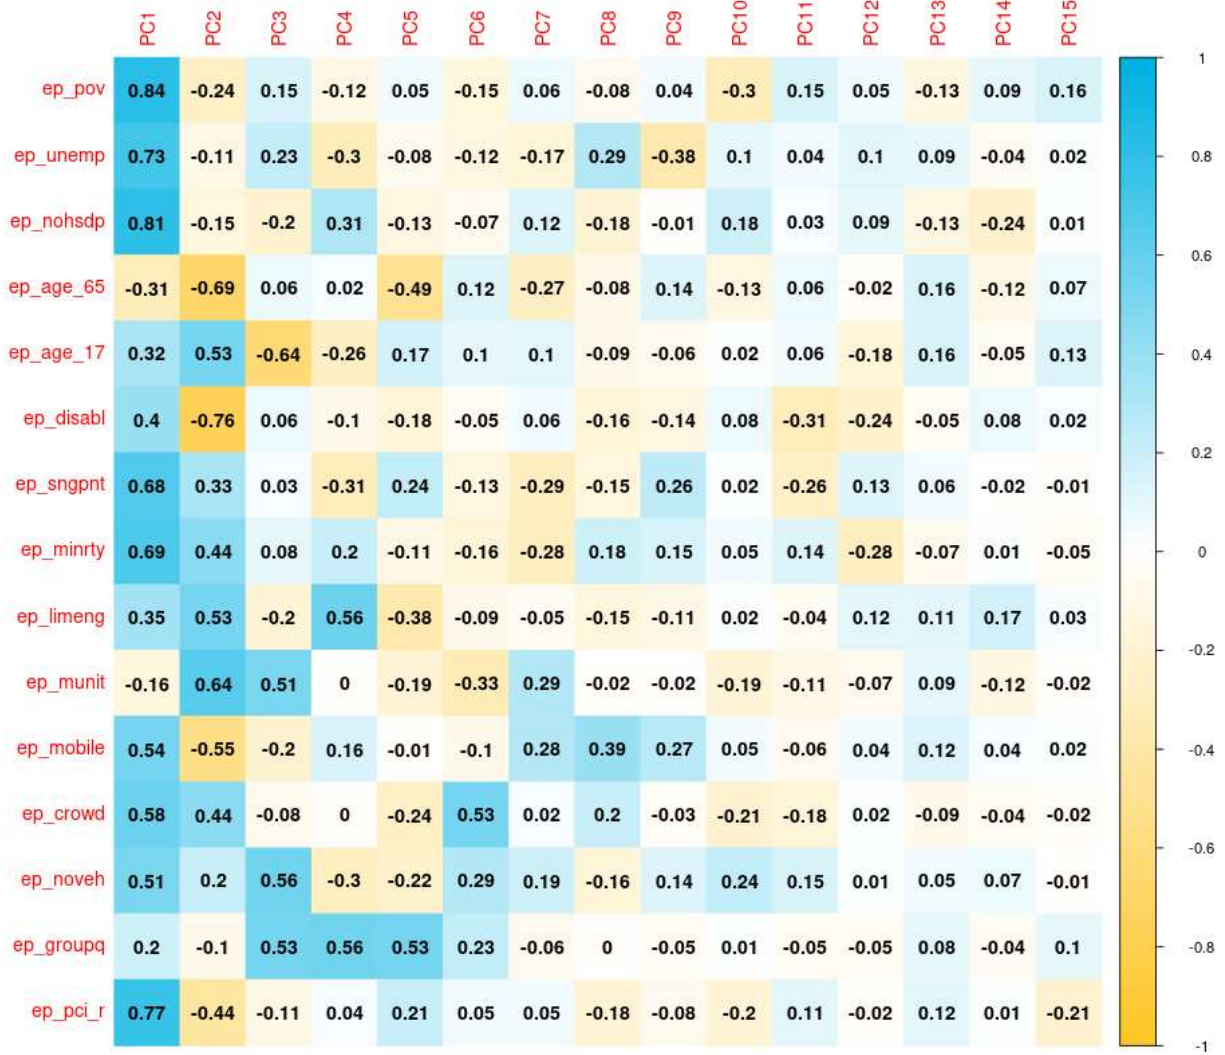

See Table 1 for SVI variable descriptions by domain.

Appendix Figure 4: Correlation between County-level SVI Variables and the Resulting DOS-SVI for the AMI cohort

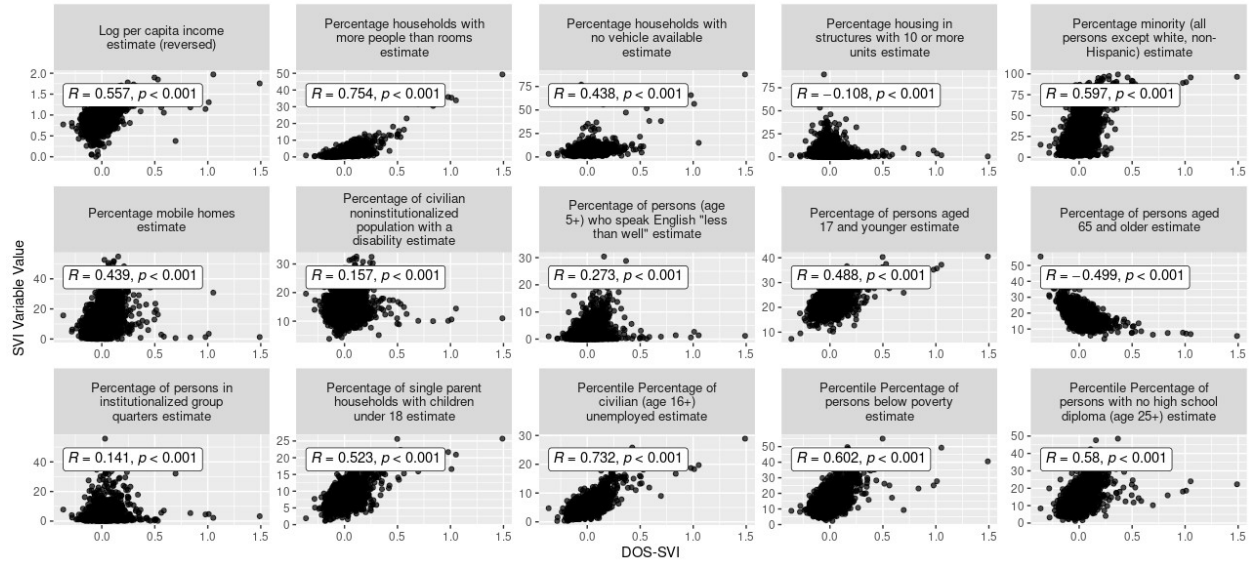

Appendix Figure 5: Correlation between County-level SVI Variables and the Resulting DOS-SVI for the COVID Cohort

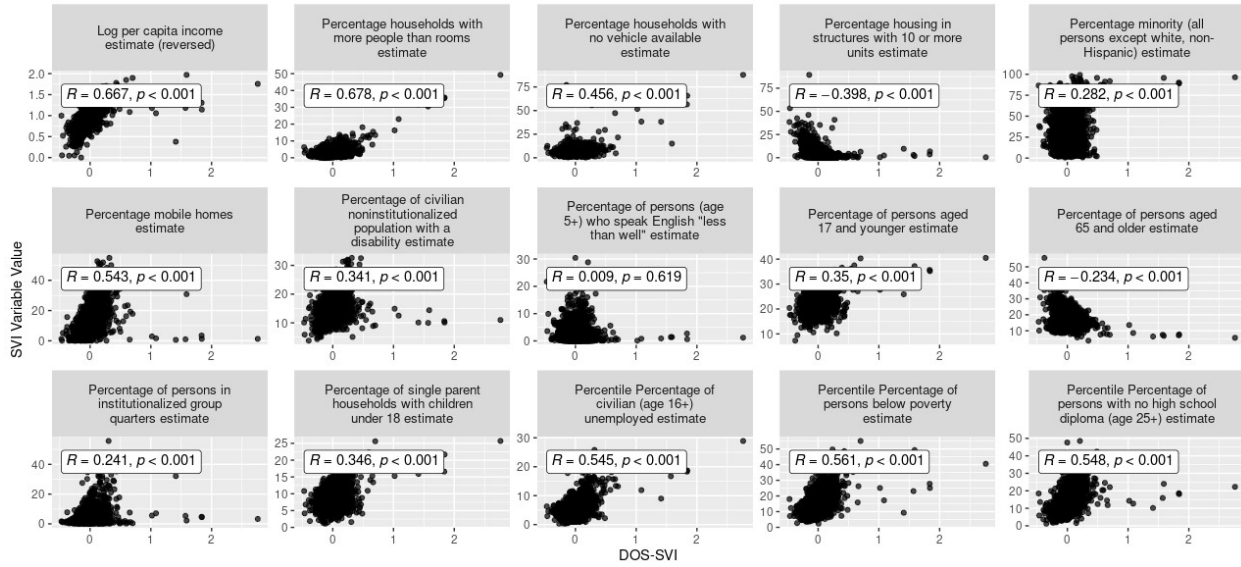

Appendix Figure 6: Correlation between County-level SVI Variables and the Resulting DOS-SVI for the HF Cohort

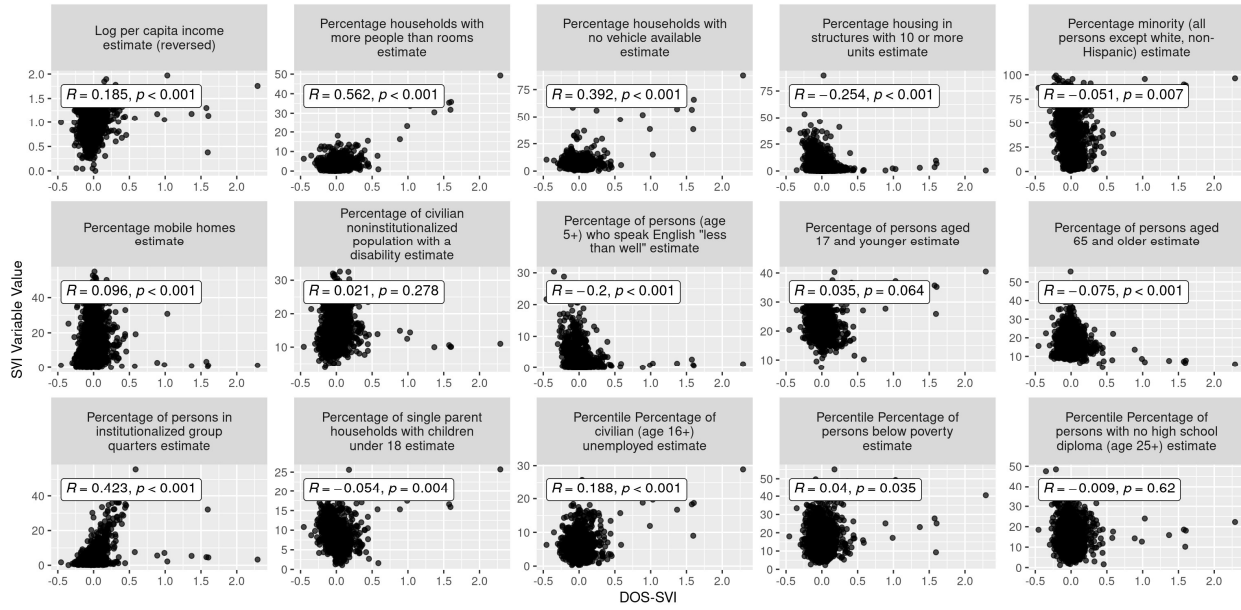

Appendix Figure 7: Correlation between County-level SVI Variables and the Resulting DOS-SVI for the PN Cohort

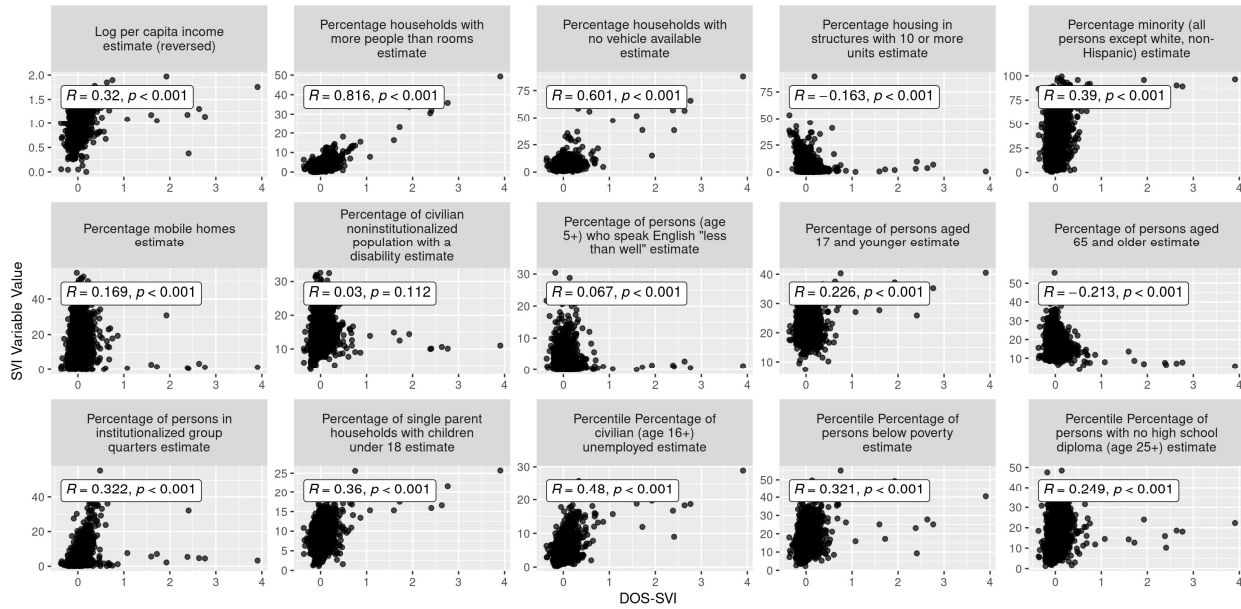

Appendix Figure 8: Correlation between County-level SVI Variables and the Resulting DOS-SVI for the PR Cohort

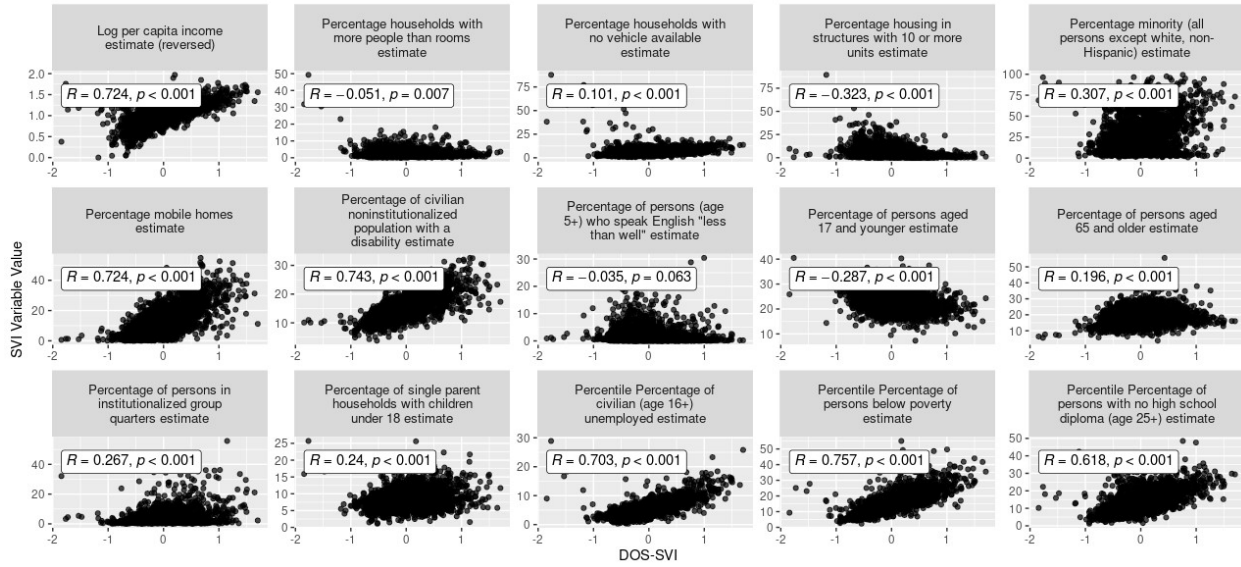



Appendix Figure 9: Correlation between County-level SVI Variables and the Resulting DOS-SVI for the STK Cohort

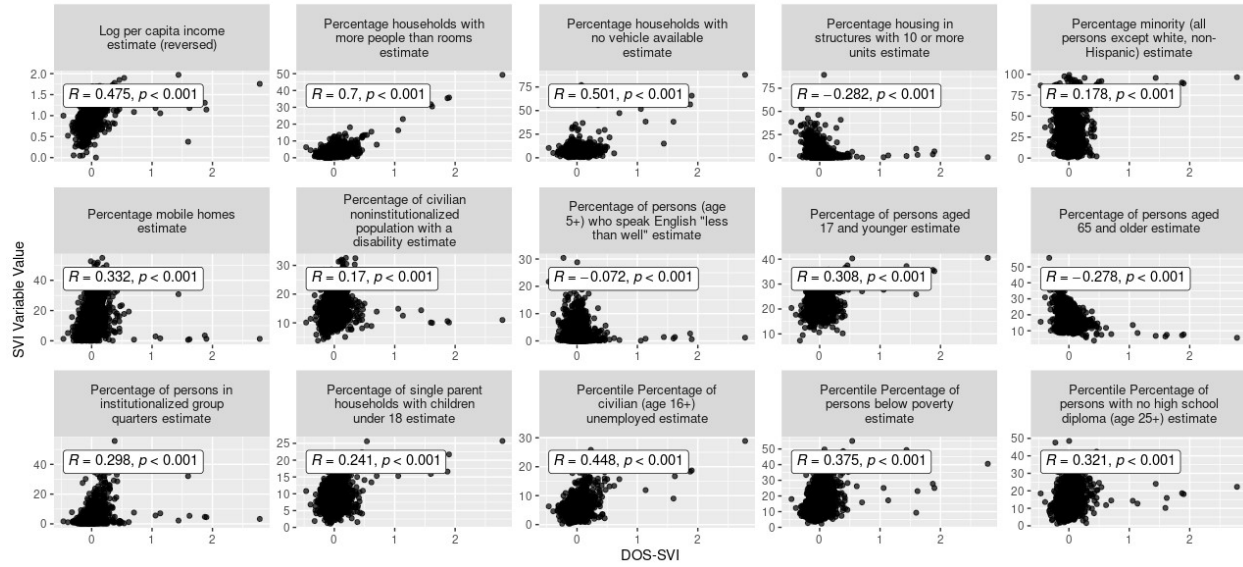

Appendix Figure 10: Correlation between County-level SVI Variables and the Resulting DOS-SVI for the THA/TKA Cohort

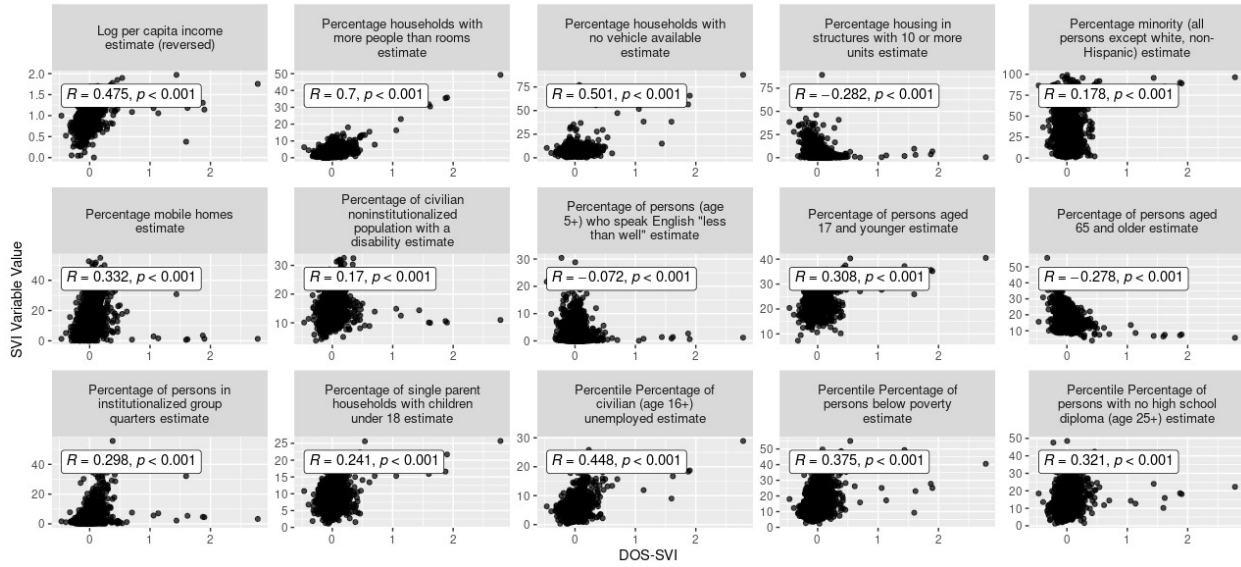

Appendix Figure 11: North Carolina DOS-SVI and SVI Percentile Comparison

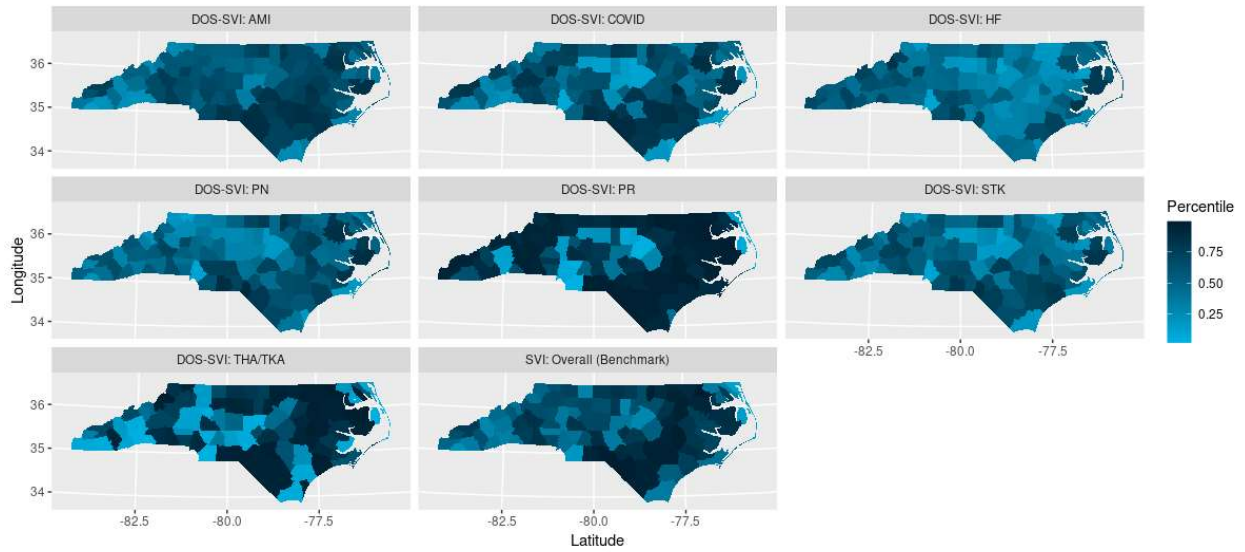

AMI = Acute Myocardial Infarction, COVID = Coronavirus-19, HF = Heart Failure, PR = Perinatal and Related Conditions, PN = Pneumonia, STK = Stroke, THA/TKA = Total Hip and Knee Arthroplasty

Appendix Figure 12: Log County Volume of In and Out of Sample Counties by Disease Group

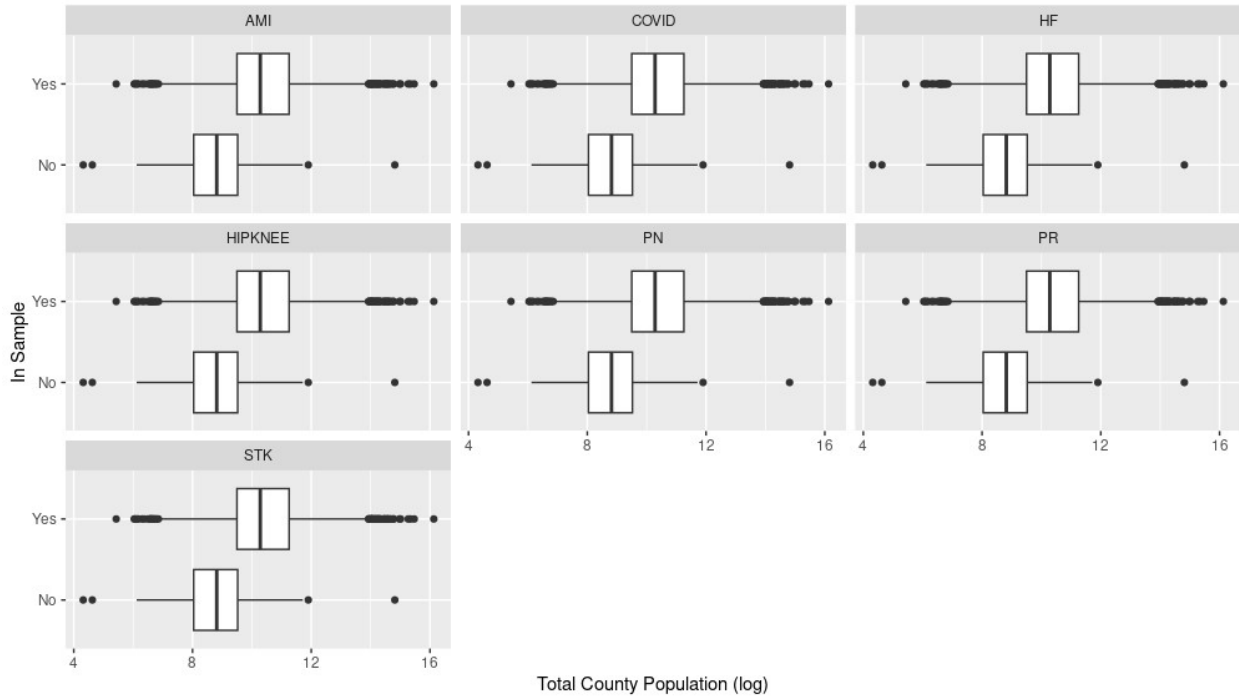

AMI = Acute Myocardial Infarction, COVID = Coronavirus-19, HF = Heart Failure, PR = Perinatal and Related Conditions, PN = Pneumonia, STK = Stroke, THA/TKA = Total Hip and Knee Arthroplasty

Appendix Figure 13: DOS-SVI Distribution for In and Out of Counties by Disease Group

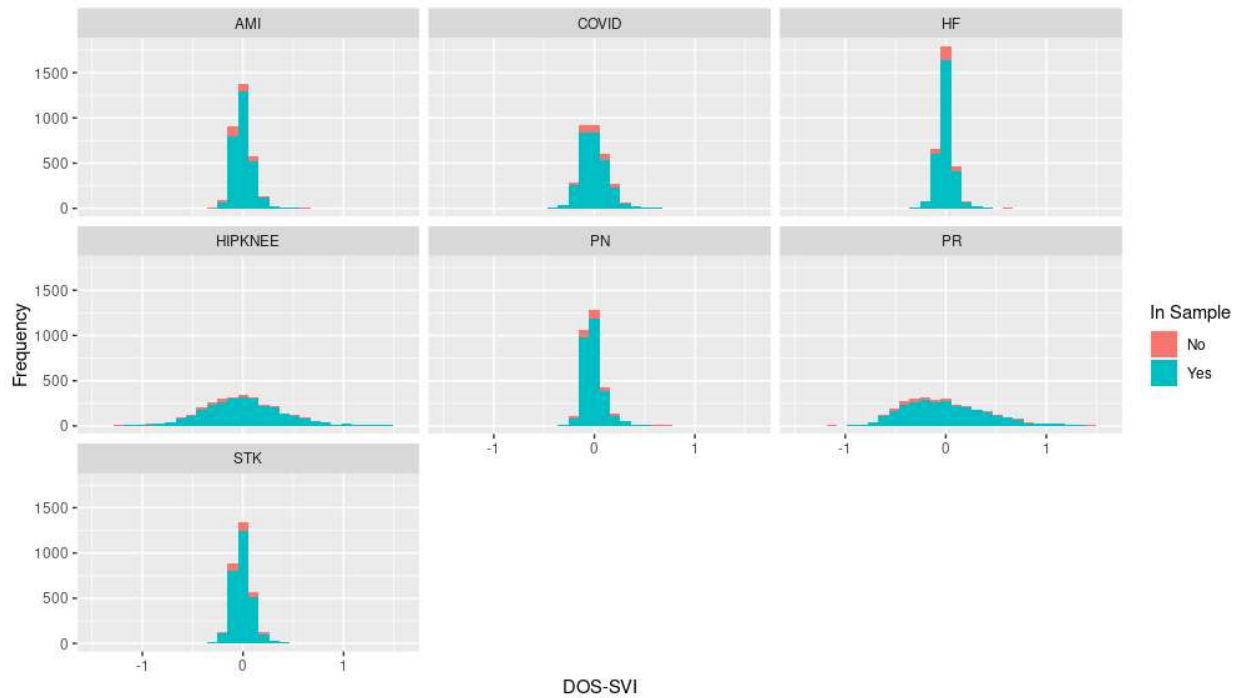

Index values with an absolute value greater than 1.5 were excluded for scale. AMI = Acute Myocardial Infarction, COVID = Coronavirus-19, HF = Heart Failure, PR = Perinatal and Related Conditions, PN = Pneumonia, STK = Stroke, THA/TKA = Total Hip and Knee Arthroplasty

Appendix Table 1: Disease-Specific Principal Component Weights and Variable Statistics Derived from the Poisson Rate Regression Model

| Disease Group | Variable    | Estimate | Standard Error | T-Statistic | P-value           |
|---------------|-------------|----------|----------------|-------------|-------------------|
| AMI           | (INTERCEPT) | 0.001    | 0.0102         | 0.11        | 0.9091            |
|               | PC_1        | 0.042    | 0.0045         | 9.19        | <b>&lt;0.0001</b> |
|               | PC_2        | 0.012    | 0.0043         | 2.76        | <b>0.0058</b>     |
|               | PC_3        | -0.007   | 0.0078         | -0.94       | 0.3462            |
|               | PC_4        | -0.013   | 0.0111         | -1.16       | 0.2468            |
|               | PC_5        | 0.008    | 0.0090         | 0.89        | 0.3740            |
|               | PC_6        | 0.026    | 0.0128         | 2.07        | <b>0.0389</b>     |
|               | PC_7        | 0.020    | 0.0111         | 1.84        | 0.0652            |
|               | PC_8        | 0.053    | 0.0136         | 3.88        | <b>0.0001</b>     |
|               | PC_9        | -0.038   | 0.0174         | -2.19       | <b>0.0284</b>     |
| HF            | (INTERCEPT) | 0.061    | 0.0100         | 6.11        | <b>&lt;0.0001</b> |
|               | PC_1        | 0.009    | 0.0043         | 2.01        | <b>0.0445</b>     |
|               | PC_2        | -0.003   | 0.0043         | -0.61       | 0.5396            |
|               | PC_3        | 0.018    | 0.0075         | 2.35        | <b>0.0187</b>     |
|               | PC_4        | -0.004   | 0.0106         | -0.37       | 0.7101            |
|               | PC_5        | 0.021    | 0.0087         | 2.43        | <b>0.0153</b>     |
|               | PC_6        | 0.124    | 0.0118         | 10.48       | <b>&lt;0.0001</b> |
|               | PC_7        | 0.020    | 0.0105         | 1.93        | 0.0533            |
|               | PC_8        | 0.047    | 0.0132         | 3.58        | <b>0.0003</b>     |
|               | PC_9        | -0.026   | 0.0172         | -1.50       | 0.1328            |
| PN            | (INTERCEPT) | 0.024    | 0.0066         | 3.59        | <b>0.0003</b>     |
|               | PC_1        | 0.044    | 0.0027         | 16.08       | <b>&lt;0.0001</b> |
|               | PC_2        | 0.016    | 0.0028         | 5.90        | <b>&lt;0.0001</b> |
|               | PC_3        | 0.026    | 0.0050         | 5.12        | <b>&lt;0.0001</b> |
|               | PC_4        | -0.020   | 0.0070         | -2.88       | <b>0.0039</b>     |
|               | PC_5        | 0.008    | 0.0058         | 1.33        | 0.1833            |
|               | PC_6        | 0.154    | 0.0074         | 20.84       | <b>&lt;0.0001</b> |
|               | PC_7        | -0.016   | 0.0070         | -2.30       | <b>0.0217</b>     |
|               | PC_8        | 0.075    | 0.0083         | 8.95        | <b>&lt;0.0001</b> |
|               | PC_9        | -0.007   | 0.0113         | -0.62       | 0.5354            |
| STK           | (INTERCEPT) | 0.061    | 0.0090         | 6.77        | <b>&lt;0.0001</b> |
|               | PC_1        | 0.035    | 0.0038         | 9.27        | <b>&lt;0.0001</b> |
|               | PC_2        | <0.001   | 0.0037         | -0.11       | 0.9145            |
|               | PC_3        | 0.003    | 0.0066         | 0.41        | 0.6810            |
|               | PC_4        | -0.021   | 0.0094         | -2.29       | <b>0.0219</b>     |

|         |             |        |        |       |                   |
|---------|-------------|--------|--------|-------|-------------------|
|         | PC_5        | 0.026  | 0.0079 | 3.35  | <b>0.0008</b>     |
|         | PC_6        | 0.116  | 0.0101 | 11.51 | <b>&lt;0.0001</b> |
|         | PC_7        | 0.049  | 0.0094 | 5.19  | <b>&lt;0.0001</b> |
|         | PC_8        | 0.051  | 0.0113 | 4.49  | <b>&lt;0.0001</b> |
|         | PC_9        | -0.032 | 0.0154 | -2.09 | <b>0.0366</b>     |
| COVID   | (INTERCEPT) | 0.078  | 0.0036 | 21.62 | <b>&lt;0.0001</b> |
|         | PC_1        | 0.055  | 0.0015 | 36.66 | <b>&lt;0.0001</b> |
|         | PC_2        | -0.012 | 0.0015 | -7.56 | <b>&lt;0.0001</b> |
|         | PC_3        | -0.014 | 0.0028 | -5.00 | <b>&lt;0.0001</b> |
|         | PC_4        | -0.019 | 0.0038 | -5.01 | <b>&lt;0.0001</b> |
|         | PC_5        | 0.023  | 0.0033 | 6.84  | <b>&lt;0.0001</b> |
|         | PC_6        | 0.105  | 0.0041 | 25.84 | <b>&lt;0.0001</b> |
|         | PC_7        | 0.054  | 0.0039 | 13.96 | <b>&lt;0.0001</b> |
|         | PC_8        | 0.050  | 0.0046 | 10.80 | <b>&lt;0.0001</b> |
|         | PC_9        | -0.021 | 0.0062 | -3.44 | <b>0.0006</b>     |
| PR      | (INTERCEPT) | 0.154  | 0.1100 | 1.40  | 0.1614            |
|         | PC_1        | 0.134  | 0.0422 | 3.17  | <b>0.0015</b>     |
|         | PC_2        | -0.148 | 0.0426 | -3.47 | <b>0.0005</b>     |
|         | PC_3        | 0.061  | 0.0743 | 0.83  | 0.4088            |
|         | PC_4        | 0.034  | 0.1067 | 0.32  | 0.7501            |
|         | PC_5        | -0.010 | 0.0878 | -0.12 | 0.9083            |
|         | PC_6        | -0.183 | 0.1198 | -1.53 | 0.1266            |
|         | PC_7        | -0.039 | 0.1077 | -0.36 | 0.7192            |
|         | PC_8        | 0.090  | 0.1308 | 0.69  | 0.4910            |
|         | PC_9        | -0.078 | 0.1660 | -0.47 | 0.6402            |
| THA/TKA | (INTERCEPT) | -0.046 | 0.1367 | -0.34 | 0.7345            |
|         | PC_1        | 0.075  | 0.0523 | 1.43  | 0.1537            |
|         | PC_2        | -0.085 | 0.0583 | -1.46 | 0.1433            |
|         | PC_3        | 0.169  | 0.0902 | 1.88  | 0.0604            |
|         | PC_4        | 0.012  | 0.1342 | 0.09  | 0.9315            |
|         | PC_5        | 0.234  | 0.1005 | 2.33  | <b>0.0196</b>     |
|         | PC_6        | -0.336 | 0.1791 | -1.87 | 0.0610            |
|         | PC_7        | -0.066 | 0.1353 | -0.49 | 0.6256            |
|         | PC_8        | -0.161 | 0.1746 | -0.92 | 0.3569            |
|         | PC_9        | 0.052  | 0.2122 | 0.25  | 0.8058            |

**Note: Boldface indicates statistical significance ( $p < 0.05$ ).** AMI = Acute Myocardial Infarction, COVID = Coronavirus-19, HF = Heart Failure, PR = Perinatal and Related Conditions, PN = Pneumonia, STK = Stroke, THA/TKA = Total Hip and Knee Arthroplasty

Appendix Table 2: Root Mean Squared Error Between the SVI and DOS-SVI by County Population Quartile

| <b>Disease Group</b> | <b>Quartile 1</b> | <b>Quartile 2</b> | <b>Quartile 3</b> | <b>Quartile 4</b> |
|----------------------|-------------------|-------------------|-------------------|-------------------|
| AMI                  | 53.36             | 62.30             | 59.87             | 54.87             |
| COVID                | 58.88             | 66.86             | 60.66             | 40.99             |
| HF                   | 63.46             | 62.61             | 58.70             | 43.66             |
| PN                   | 57.97             | 61.76             | 59.76             | 50.46             |
| PR                   | 57.08             | 66.27             | 59.31             | 45.62             |
| STK                  | 58.46             | 65.31             | 61.03             | 43.47             |
| THA/TKA              | 50.56             | 60.81             | 60.59             | 57.67             |

Quartile 4 includes counties with the largest populations while Quartile 1 is comprised of the least populated counties.



Appendix Table 3: AMI DOS-SVI and CDC SVI Percentiles by County

| County FIPS | County Description | DOS-SVI Index | DOS-SVI Percentile | SVI Percentile |
|-------------|--------------------|---------------|--------------------|----------------|
| 01001       | Autauga, AL        | 0.005         | 58.48              | 43.54          |
| 01003       | Baldwin, AL        | -0.066        | 25.06              | 21.62          |
| 01005       | Barbour, AL        | 0.124         | 90.45              | 99.59          |
| 01007       | Bibb, AL           | 0.08          | 82.71              | 60.03          |
| 01009       | Blount, AL         | 0.005         | 58.55              | 42.42          |
| 01011       | Bullock, AL        | 0.067         | 79.75              | 88.98          |
| 01013       | Butler, AL         | 0.041         | 72.3               | 86.53          |
| 01015       | Calhoun, AL        | 0.041         | 72.43              | 82.52          |
| 01017       | Chambers, AL       | -0.013        | 49.83              | 73.82          |
| 01019       | Cherokee, AL       | 0.008         | 59.53              | 45.16          |
| 01021       | Chilton, AL        | 0.093         | 85.36              | 76.02          |
| 01023       | Choctaw, AL        | 0.083         | 83.44              | 87.48          |
| 01025       | Clarke, AL         | 0.194         | 96.62              | 84.71          |
| 01027       | Clay, AL           | -0.019        | 47.28              | 56.4           |
| 01029       | Cleburne, AL       | 0.067         | 79.78              | 54.17          |
| 01031       | Coffee, AL         | -0.003        | 54.92              | 54.08          |
| 01033       | Colbert, AL        | -0.055        | 30.02              | 42.74          |
| 01035       | Conecuh, AL        | 0.09          | 84.75              | 80.86          |
| 01037       | Coosa, AL          | -0.011        | 50.91              | 52.61          |
| 01039       | Covington, AL      | 0.05          | 75.1               | 77.23          |
| 01041       | Crenshaw, AL       | 0.008         | 59.5               | 68.73          |
| 01043       | Cullman, AL        | 0.024         | 66.44              | 51.82          |
| 01045       | Dale, AL           | 0.084         | 83.48              | 75.99          |
| 01047       | Dallas, AL         | 0.16          | 94.4               | 94.9           |
| 01049       | DeKalb, AL         | 0.037         | 71                 | 80.22          |
| 01051       | Elmore, AL         | 0.018         | 63.93              | 54.01          |
| 01053       | Escambia, AL       | 0.175         | 95.54              | 85.57          |
| 01055       | Etowah, AL         | -0.022        | 45.88              | 65.64          |
| 01057       | Fayette, AL        | 0.014         | 61.92              | 70.38          |
| 01059       | Franklin, AL       | 0.058         | 77.49              | 84.17          |
| 01061       | Geneva, AL         | 0.073         | 81.25              | 79.55          |
| 01063       | Greene, AL         | 0.269         | 98.47              | 98.54          |
| 01065       | Hale, AL           | 0.197         | 96.78              | 95.99          |
| 01067       | Henry, AL          | -0.001        | 55.49              | 55.19          |
| 01069       | Houston, AL        | 0.004         | 57.88              | 68.38          |
| 01071       | Jackson, AL        | 0.017         | 63.36              | 57.26          |
| 01073       | Jefferson, AL      | -0.01         | 51.83              | 66.21          |
| 01075       | Lamar, AL          | 0.049         | 74.88              | 62.64          |
| 01077       | Lauderdale, AL     | -0.058        | 28.59              | 44.68          |
| 01079       | Lawrence, AL       | 0.02          | 64.72              | 49.52          |
| 01081       | Lee, AL            | 0.052         | 75.68              | 66.02          |
| 01083       | Limestone, AL      | 0.039         | 71.76              | 52.96          |
| 01085       | Lowndes, AL        | 0.136         | 92.1               | 91.88          |
| 01087       | Macon, AL          | 0.108         | 88.22              | 89.71          |
| 01089       | Madison, AL        | -0.027        | 43.87              | 30.76          |
| 01091       | Marengo, AL        | 0.09          | 84.97              | 76.21          |
| 01093       | Marion, AL         | -0.004        | 54.51              | 67.1           |
| 01095       | Marshall, AL       | 0.014         | 61.95              | 72.61          |
| 01097       | Mobile, AL         | 0.004         | 57.69              | 75.32          |
| 01099       | Monroe, AL         | 0.228         | 97.68              | 74.81          |
| 01101       | Montgomery, AL     | 0.009         | 60.24              | 84.27          |
| 01103       | Morgan, AL         | -0.01         | 51.42              | 68.95          |
| 01105       | Perry, AL          | 0.167         | 94.91              | 99.49          |
| 01107       | Pickens, AL        | 0.094         | 85.61              | 92.07          |

| County FIPS | County Description               | DOS-SVI Index | DOS-SVI Percentile | SVI Percentile |
|-------------|----------------------------------|---------------|--------------------|----------------|
| 01109       | Pike, AL                         | 0.068         | 80.07              | 90.16          |
| 01111       | Randolph, AL                     | 0.017         | 63.42              | 71.91          |
| 01113       | Russell, AL                      | 0.098         | 86.31              | 91.15          |
| 01115       | St. Clair, AL                    | 0.019         | 64.37              | 36.56          |
| 01117       | Shelby, AL                       | -0.034        | 40.78              | 11.69          |
| 01119       | Sumter, AL                       | 0.164         | 94.72              | 95.57          |
| 01121       | Talladega, AL                    | 0.063         | 78.73              | 87.36          |
| 01123       | Tallapoosa, AL                   | 0.082         | 83.13              | 88.63          |
| 01125       | Tuscaloosa, AL                   | 0             | 56.13              | 62.55          |
| 01127       | Walker, AL                       | 0.093         | 85.55              | 74.52          |
| 01129       | Washington, AL                   | 0.117         | 89.59              | 73.03          |
| 01131       | Wilcox, AL                       | 0.273         | 98.53              | 92.8           |
| 01133       | Winston, AL                      | 0.023         | 65.97              | 70.25          |
| 02013       | Aleutians East, AK               | -0.048        | 33.43              | 58.03          |
| 02016       | Aleutians West, AK               | 0.107         | 88                 | 49.27          |
| 02020       | Anchorage, AK                    | 0.06          | 77.94              | 46.02          |
| 02050       | Bethel, AK                       | 1.009         | 99.94              | 97.48          |
| 02060       | Bristol Bay, AK                  | 0.111         | 88.73              | 35.25          |
| 02068       | Denali, AK                       | 0.032         | 69.25              | 10.1           |
| 02070       | Dillingham, AK                   | 0.586         | 99.71              | 86.82          |
| 02090       | Fairbanks North Star,<br>AK      | 0.13          | 91.28              | 34.46          |
| 02100       | Haines, AK                       | 0.029         | 67.94              | 20.7           |
| 02105       | Hoonah-Angoon, AK                | 0.073         | 81.09              | 41.78          |
| 02110       | Juneau City and<br>Borough, AK   | 0.061         | 78.19              | 29.87          |
| 02122       | Kenai Peninsula, AK              | 0.079         | 82.62              | 40.73          |
| 02130       | Ketchikan Gateway,<br>AK         | 0.034         | 69.66              | 55.48          |
| 02150       | Kodiak Island, AK                | 0.138         | 92.3               | 70.06          |
| 02158       | Kusilvak, AK                     | 1.49          | 100                | 93.34          |
| 02164       | Lake and Peninsula, AK           | 0.366         | 99.27              | 79.78          |
| 02170       | Matanuska-Susitna, AK            | 0.173         | 95.19              | 31.72          |
| 02180       | Nome, AK                         | 0.836         | 99.87              | 92.99          |
| 02185       | North Slope, AK                  | 0.696         | 99.84              | 73.44          |
| 02188       | Northwest Arctic, AK             | 0.979         | 99.9               | 93.54          |
| 02195       | Petersburg, AK                   | -0.046        | 34.38              | 66.5           |
| 02198       | Prince of Wales-Hyder,<br>AK     | 0.222         | 97.52              | 76.62          |
| 02220       | Sitka City and Borough,<br>AK    | -0.016        | 48.9               | 40.22          |
| 02230       | Skagway, AK                      | 0.063         | 78.8               | 16.85          |
| 02240       | Southeast Fairbanks,<br>AK       | 0.265         | 98.34              | 58.38          |
| 02261       | Valdez-Cordova, AK               | 0.066         | 79.43              | 27.04          |
| 02275       | Wrangell City and<br>Borough, AK | -0.045        | 35.31              | 56.18          |
| 02282       | Yakutat City and<br>Borough, AK  | 0.143         | 92.65              | 58.73          |
| 02290       | Yukon-Koyukuk, AK                | 0.561         | 99.68              | 88.12          |
| 04001       | Apache, AZ                       | 0.418         | 99.39              | 98.85          |
| 04003       | Cochise, AZ                      | 0.015         | 62.59              | 90.64          |
| 04005       | Coconino, AZ                     | 0.173         | 95.32              | 71.31          |
| 04007       | Gila, AZ                         | 0.06          | 77.97              | 89.9           |
| 04009       | Graham, AZ                       | 0.25          | 98.19              | 96.4           |

| <b>County FIPS</b> | <b>County Description</b> | <b>DOS-SVI Index</b> | <b>DOS-SVI Percentile</b> | <b>SVI Percentile</b> |
|--------------------|---------------------------|----------------------|---------------------------|-----------------------|
| 04011              | Greenlee, AZ              | 0.143                | 92.68                     | 61.88                 |
| 04012              | La Paz, AZ                | 0.025                | 66.57                     | 92.36                 |
| 04013              | Maricopa, AZ              | 0.025                | 66.95                     | 63.54                 |
| 04015              | Mohave, AZ                | 0.016                | 62.66                     | 86.24                 |
| 04017              | Navajo, AZ                | 0.353                | 99.24                     | 99.55                 |
| 04019              | Pima, AZ                  | 0.025                | 66.48                     | 88.28                 |
| 04021              | Pinal, AZ                 | 0.082                | 83.16                     | 85.92                 |
| 04023              | Santa Cruz, AZ            | 0.074                | 81.66                     | 93.18                 |
| 04025              | Yavapai, AZ               | -0.071               | 22.73                     | 52.1                  |
| 04027              | Yuma, AZ                  | 0.191                | 96.56                     | 98.95                 |
| 05001              | Arkansas, AR              | -0.007               | 52.88                     | 77.87                 |
| 05003              | Ashley, AR                | 0.03                 | 68.7                      | 85.76                 |
| 05005              | Baxter, AR                | -0.125               | 6.72                      | 27.93                 |
| 05007              | Benton, AR                | -0.004               | 54.38                     | 27.07                 |
| 05009              | Boone, AR                 | -0.032               | 41.83                     | 43.79                 |
| 05011              | Bradley, AR               | 0.072                | 80.83                     | 98.03                 |
| 05013              | Calhoun, AR               | 0.004                | 57.78                     | 54.81                 |
| 05015              | Carroll, AR               | 0.039                | 71.63                     | 59.52                 |
| 05017              | Chicot, AR                | 0.056                | 76.69                     | 99.68                 |
| 05019              | Clark, AR                 | -0.039               | 38.2                      | 78.92                 |
| 05021              | Clay, AR                  | -0.067               | 24.8                      | 65.29                 |
| 05023              | Cleburne, AR              | -0.091               | 15.44                     | 20.83                 |
| 05025              | Cleveland, AR             | 0.006                | 59.15                     | 56.43                 |
| 05027              | Columbia, AR              | 0.134                | 91.85                     | 93.98                 |
| 05029              | Conway, AR                | 0.014                | 61.99                     | 75.89                 |
| 05031              | Craighead, AR             | 0.009                | 59.98                     | 80.41                 |
| 05033              | Crawford, AR              | 0.024                | 66.22                     | 61.05                 |
| 05035              | Crittenden, AR            | 0.112                | 88.79                     | 93.41                 |
| 05037              | Cross, AR                 | 0.001                | 56.35                     | 70.13                 |
| 05039              | Dallas, AR                | -0.027               | 43.65                     | 87.77                 |
| 05041              | Desha, AR                 | 0.102                | 87.07                     | 95.96                 |
| 05043              | Drew, AR                  | 0.048                | 74.75                     | 80.1                  |
| 05045              | Faulkner, AR              | 0.027                | 67.49                     | 47.74                 |
| 05047              | Franklin, AR              | 0.006                | 58.99                     | 59.43                 |
| 05049              | Fulton, AR                | 0.023                | 66.03                     | 66.88                 |
| 05051              | Garland, AR               | -0.045               | 35.18                     | 82.8                  |
| 05053              | Grant, AR                 | 0.051                | 75.39                     | 35.41                 |
| 05055              | Greene, AR                | 0.047                | 74.34                     | 58.34                 |
| 05057              | Hempstead, AR             | 0.021                | 65.08                     | 94.68                 |
| 05059              | Hot Spring, AR            | 0.074                | 81.73                     | 81.88                 |
| 05061              | Howard, AR                | 0.02                 | 64.69                     | 90.45                 |
| 05063              | Independence, AR          | 0.007                | 59.19                     | 75.25                 |
| 05065              | Izard, AR                 | 0.036                | 70.42                     | 56.97                 |
| 05067              | Jackson, AR               | 0.041                | 72.21                     | 76.5                  |
| 05069              | Jefferson, AR             | 0.091                | 85.16                     | 94.36                 |
| 05071              | Johnson, AR               | 0.031                | 69.02                     | 87.68                 |
| 05073              | Lafayette, AR             | -0.019               | 47.21                     | 78.98                 |
| 05075              | Lawrence, AR              | 0.01                 | 60.3                      | 64.71                 |
| 05077              | Lee, AR                   | 0.186                | 96.08                     | 96.56                 |
| 05079              | Lincoln, AR               | 0.111                | 88.67                     | 81.34                 |
| 05081              | Little River, AR          | 0.067                | 79.94                     | 63.06                 |
| 05083              | Logan, AR                 | 0.044                | 73.22                     | 80.45                 |
| 05085              | Lonoke, AR                | 0.018                | 63.9                      | 33.09                 |
| 05087              | Madison, AR               | 0.061                | 78.29                     | 65.35                 |
| 05089              | Marion, AR                | -0.019               | 47.31                     | 51.75                 |

| <b>County FIPS</b> | <b>County Description</b> | <b>DOS-SVI Index</b> | <b>DOS-SVI Percentile</b> | <b>SVI Percentile</b> |
|--------------------|---------------------------|----------------------|---------------------------|-----------------------|
| 05091              | Miller, AR                | 0.07                 | 80.42                     | 91.24                 |
| 05093              | Mississippi, AR           | 0.119                | 89.97                     | 95.54                 |
| 05095              | Monroe, AR                | -0.047               | 34.32                     | 85.16                 |
| 05097              | Montgomery, AR            | -0.025               | 44.51                     | 70                    |
| 05099              | Nevada, AR                | 0.079                | 82.58                     | 88.41                 |
| 05101              | Newton, AR                | -0.097               | 13.21                     | 28.15                 |
| 05103              | Ouachita, AR              | 0.03                 | 68.48                     | 86.56                 |
| 05105              | Perry, AR                 | 0.096                | 85.83                     | 63.6                  |
| 05107              | Phillips, AR              | 0.057                | 77.08                     | 92.39                 |
| 05109              | Pike, AR                  | -0.014               | 49.57                     | 71.24                 |
| 05111              | Poinsett, AR              | 0.049                | 75.07                     | 82.68                 |
| 05113              | Polk, AR                  | 0.107                | 87.9                      | 89.49                 |
| 05115              | Pope, AR                  | 0.022                | 65.49                     | 79.36                 |
| 05117              | Prairie, AR               | 0.021                | 64.95                     | 65.48                 |
| 05119              | Pulaski, AR               | -0.041               | 37.19                     | 62.87                 |
| 05121              | Randolph, AR              | -0.038               | 38.55                     | 71.66                 |
| 05123              | St. Francis, AR           | 0.098                | 86.41                     | 96.91                 |
| 05125              | Saline, AR                | -0.036               | 39.73                     | 33.25                 |
| 05127              | Scott, AR                 | 0.149                | 93.6                      | 88.73                 |
| 05129              | Searcy, AR                | -0.087               | 16.94                     | 43.76                 |
| 05131              | Sebastian, AR             | -0.003               | 55.01                     | 83.28                 |
| 05133              | Sevier, AR                | 0.182                | 95.86                     | 76.75                 |
| 05135              | Sharp, AR                 | -0.049               | 32.98                     | 61.91                 |
| 05137              | Stone, AR                 | -0.011               | 51.38                     | 51.02                 |
| 05139              | Union, AR                 | 0.112                | 88.95                     | 80.54                 |
| 05141              | Van Buren, AR             | -0.006               | 53.71                     | 72.26                 |
| 05143              | Washington, AR            | 0.022                | 65.42                     | 67.45                 |
| 05145              | White, AR                 | 0.025                | 66.98                     | 74.46                 |
| 05147              | Woodruff, AR              | 0                    | 56.1                      | 84.9                  |
| 05149              | Yell, AR                  | 0.057                | 77.17                     | 87.83                 |
| 06001              | Alameda, CA               | 0.054                | 76.19                     | 47.01                 |
| 06003              | Alpine, CA                | 0.131                | 91.47                     | 72.87                 |
| 06005              | Amador, CA                | -0.036               | 39.54                     | 53.34                 |
| 06007              | Butte, CA                 | 0.057                | 77.27                     | 80.64                 |
| 06009              | Calaveras, CA             | -0.109               | 10.54                     | 23.5                  |
| 06011              | Colusa, CA                | 0.05                 | 75.36                     | 74.36                 |
| 06013              | Contra Costa, CA          | 0.015                | 62.24                     | 40.57                 |
| 06015              | Del Norte, CA             | 0.132                | 91.56                     | 97.13                 |
| 06017              | El Dorado, CA             | -0.038               | 38.52                     | 18.38                 |
| 06019              | Fresno, CA                | 0.202                | 96.94                     | 96.11                 |
| 06021              | Glenn, CA                 | 0.065                | 79.37                     | 88.95                 |
| 06023              | Humboldt, CA              | 0.045                | 73.83                     | 76.05                 |
| 06025              | Imperial, CA              | 0.348                | 99.08                     | 99.78                 |
| 06027              | Inyo, CA                  | -0.039               | 37.82                     | 57.01                 |
| 06029              | Kern, CA                  | 0.254                | 98.25                     | 96.59                 |
| 06031              | Kings, CA                 | 0.182                | 95.92                     | 97.07                 |
| 06033              | Lake, CA                  | 0.068                | 80.01                     | 91.78                 |
| 06035              | Lassen, CA                | 0.035                | 70.3                      | 59.97                 |
| 06037              | Los Angeles, CA           | 0.14                 | 92.45                     | 76.82                 |
| 06039              | Madera, CA                | 0.189                | 96.31                     | 95.41                 |
| 06041              | Marin, CA                 | -0.098               | 12.96                     | 27.01                 |
| 06043              | Mariposa, CA              | -0.015               | 49.32                     | 52.93                 |
| 06045              | Mendocino, CA             | 0.067                | 79.91                     | 88.18                 |
| 06047              | Merced, CA                | 0.283                | 98.66                     | 97.17                 |
| 06049              | Modoc, CA                 | 0.003                | 57.18                     | 75.16                 |

| <b>County FIPS</b> | <b>County Description</b> | <b>DOS-SVI Index</b> | <b>DOS-SVI Percentile</b> | <b>SVI Percentile</b> |
|--------------------|---------------------------|----------------------|---------------------------|-----------------------|
| 06051              | Mono, CA                  | -0.08                | 19.07                     | 14.08                 |
| 06053              | Monterey, CA              | 0.191                | 96.53                     | 79.9                  |
| 06055              | Napa, CA                  | 0.01                 | 60.62                     | 50.51                 |
| 06057              | Nevada, CA                | -0.095               | 13.72                     | 20.45                 |
| 06059              | Orange, CA                | 0.077                | 82.39                     | 41.91                 |
| 06061              | Placer, CA                | -0.056               | 29.67                     | 15.19                 |
| 06063              | Plumas, CA                | -0.104               | 11.43                     | 26.53                 |
| 06065              | Riverside, CA             | 0.153                | 93.95                     | 79.39                 |
| 06067              | Sacramento, CA            | 0.06                 | 78.03                     | 73.38                 |
| 06069              | San Benito, CA            | 0.144                | 92.84                     | 52.45                 |
| 06071              | San Bernardino, CA        | 0.204                | 97.01                     | 90.1                  |
| 06073              | San Diego, CA             | 0.067                | 79.72                     | 55.96                 |
| 06075              | San Francisco, CA         | -0.039               | 37.85                     | 39.11                 |
| 06077              | San Joaquin, CA           | 0.156                | 94.14                     | 88.92                 |
| 06079              | San Luis Obispo, CA       | -0.046               | 34.64                     | 37.39                 |
| 06081              | San Mateo, CA             | 0.02                 | 64.76                     | 26.5                  |
| 06083              | Santa Barbara, CA         | 0.129                | 91.12                     | 71.11                 |
| 06085              | Santa Clara, CA           | 0.066                | 79.53                     | 35.57                 |
| 06087              | Santa Cruz, CA            | 0.073                | 81.22                     | 54.3                  |
| 06089              | Shasta, CA                | 0.002                | 56.99                     | 70.22                 |
| 06091              | Sierra, CA                | -0.179               | 1.34                      | 4.52                  |
| 06093              | Siskiyou, CA              | 0.003                | 57.31                     | 72.23                 |
| 06095              | Solano, CA                | 0.046                | 73.89                     | 59.11                 |
| 06097              | Sonoma, CA                | -0.016               | 49.06                     | 40.35                 |
| 06099              | Stanislaus, CA            | 0.173                | 95.16                     | 86.75                 |
| 06101              | Sutter, CA                | 0.13                 | 91.37                     | 88.22                 |
| 06103              | Tehama, CA                | 0.129                | 91.18                     | 96.24                 |
| 06105              | Trinity, CA               | -0.01                | 51.54                     | 74.11                 |
| 06107              | Tulare, CA                | 0.24                 | 97.93                     | 94.17                 |
| 06109              | Tuolumne, CA              | -0.04                | 37.57                     | 46.88                 |
| 06111              | Ventura, CA               | 0.058                | 77.36                     | 48.28                 |
| 06113              | Yolo, CA                  | 0.077                | 82.3                      | 67.68                 |
| 06115              | Yuba, CA                  | 0.182                | 95.83                     | 94.2                  |
| 08001              | Adams, CO                 | 0.06                 | 78                        | 58.92                 |
| 08003              | Alamosa, CO               | 0.161                | 94.49                     | 94.52                 |
| 08005              | Arapahoe, CO              | -0.034               | 41.04                     | 26.62                 |
| 08007              | Archuleta, CO             | -0.025               | 44.48                     | 25.7                  |
| 08009              | Baca, CO                  | -0.129               | 5.86                      | 60.86                 |
| 08011              | Bent, CO                  | 0.036                | 70.58                     | 89.81                 |
| 08013              | Boulder, CO               | -0.051               | 31.74                     | 17.04                 |
| 08014              | Broomfield, CO            | -0.052               | 31.52                     | 4.9                   |
| 08015              | Chaffee, CO               | -0.156               | 2.74                      | 23.89                 |
| 08017              | Cheyenne, CO              | 0.142                | 92.55                     | 25.89                 |
| 08019              | Clear Creek, CO           | -0.155               | 3.06                      | 1.97                  |
| 08021              | Conejos, CO               | 0.185                | 96.05                     | 93.25                 |
| 08023              | Costilla, CO              | 0.033                | 69.34                     | 93.79                 |
| 08025              | Crowley, CO               | 0.23                 | 97.74                     | 89.3                  |
| 08027              | Custer, CO                | -0.129               | 5.92                      | 24.33                 |
| 08029              | Delta, CO                 | 0.025                | 66.54                     | 68.66                 |
| 08031              | Denver, CO                | -0.057               | 29.04                     | 41.97                 |
| 08033              | Dolores, CO               | -0.149               | 3.47                      | 15.16                 |
| 08035              | Douglas, CO               | -0.044               | 35.75                     | 1.5                   |
| 08037              | Eagle, CO                 | -0.026               | 44.41                     | 13.69                 |
| 08039              | Elbert, CO                | -0.06                | 27.73                     | 0                     |
| 08041              | El Paso, CO               | 0.03                 | 68.35                     | 39.27                 |

| <b>County FIPS</b> | <b>County Description</b>   | <b>DOS-SVI Index</b> | <b>DOS-SVI Percentile</b> | <b>SVI Percentile</b> |
|--------------------|-----------------------------|----------------------|---------------------------|-----------------------|
| 08043              | Fremont, CO                 | -0.031               | 42.34                     | 65.25                 |
| 08045              | Garfield, CO                | 0.083                | 83.35                     | 35.1                  |
| 08047              | Gilpin, CO                  | -0.105               | 11.18                     | 0.22                  |
| 08049              | Grand, CO                   | -0.047               | 33.97                     | 9.87                  |
| 08051              | Gunnison, CO                | -0.01                | 51.77                     | 13.92                 |
| 08053              | Hinsdale, CO                | -0.127               | 6.43                      | 6.24                  |
| 08055              | Huerfano, CO                | -0.144               | 4.14                      | 59.55                 |
| 08057              | Jackson, CO                 | -0.093               | 14.36                     | 11.37                 |
| 08059              | Jefferson, CO               | -0.095               | 13.59                     | 6.27                  |
| 08061              | Kiowa, CO                   | -0.061               | 26.84                     | 31.88                 |
| 08063              | Kit Carson, CO              | -0.051               | 32.06                     | 51.53                 |
| 08065              | Lake, CO                    | 0.008                | 59.66                     | 44.52                 |
| 08067              | La Plata, CO                | -0.02                | 46.61                     | 10.86                 |
| 08069              | Larimer, CO                 | -0.045               | 34.99                     | 11.94                 |
| 08071              | Las Animas, CO              | -0.018               | 47.91                     | 83.73                 |
| 08073              | Lincoln, CO                 | -0.002               | 55.11                     | 48.57                 |
| 08075              | Logan, CO                   | -0.02                | 46.67                     | 62.8                  |
| 08077              | Mesa, CO                    | 0.019                | 64.06                     | 57.55                 |
| 08079              | Mineral, CO                 | -0.279               | 0.13                      | 2.61                  |
| 08081              | Moffat, CO                  | 0.007                | 59.41                     | 54.71                 |
| 08083              | Montezuma, CO               | 0.005                | 58.71                     | 49.46                 |
| 08085              | Montrose, CO                | 0.018                | 63.83                     | 71.53                 |
| 08087              | Morgan, CO                  | 0.01                 | 60.43                     | 74.14                 |
| 08089              | Otero, CO                   | -0.004               | 54.6                      | 95.61                 |
| 08091              | Ouray, CO                   | -0.144               | 4.17                      | 2.39                  |
| 08093              | Park, CO                    | -0.064               | 25.85                     | 0.06                  |
| 08095              | Phillips, CO                | -0.021               | 46.58                     | 29.55                 |
| 08097              | Pitkin, CO                  | -0.144               | 4.11                      | 6.56                  |
| 08099              | Prowers, CO                 | 0.072                | 80.99                     | 93.92                 |
| 08101              | Pueblo, CO                  | 0.025                | 66.92                     | 86.69                 |
| 08103              | Rio Blanco, CO              | 0.053                | 75.74                     | 34.01                 |
| 08105              | Rio Grande, CO              | 0.109                | 88.35                     | 95.86                 |
| 08107              | Routt, CO                   | -0.063               | 26.2                      | 6.34                  |
| 08109              | Saguache, CO                | 0.106                | 87.81                     | 80.7                  |
| 08111              | San Juan, CO                | -0.194               | 0.83                      | 12.83                 |
| 08113              | San Miguel, CO              | -0.09                | 15.82                     | 3.31                  |
| 08115              | Sedgwick, CO                | -0.03                | 42.44                     | 69.36                 |
| 08117              | Summit, CO                  | -0.022               | 45.91                     | 7.07                  |
| 08119              | Teller, CO                  | -0.051               | 31.93                     | 7.29                  |
| 08121              | Washington, CO              | -0.071               | 22.6                      | 28.22                 |
| 08123              | Weld, CO                    | 0.035                | 69.95                     | 39.94                 |
| 08125              | Yuma, CO                    | -0.006               | 53.55                     | 56.37                 |
| 09001              | Fairfield, CT               | -0.02                | 46.8                      | 44.97                 |
| 09003              | Hartford, CT                | -0.057               | 28.91                     | 51.5                  |
| 09005              | Litchfield, CT              | -0.107               | 10.79                     | 8.18                  |
| 09007              | Middlesex, CT               | -0.116               | 8.76                      | 11.82                 |
| 09009              | New Haven, CT               | -0.041               | 37.28                     | 52.23                 |
| 09011              | New London, CT              | -0.072               | 22.22                     | 35.61                 |
| 09013              | Tolland, CT                 | -0.065               | 25.44                     | 6.94                  |
| 09015              | Windham, CT                 | -0.046               | 34.51                     | 42.32                 |
| 10001              | Kent, DE                    | -0.008               | 52.4                      | 72.68                 |
| 10003              | New Castle, DE              | -0.037               | 39.16                     | 37.61                 |
| 10005              | Sussex, DE                  | -0.099               | 12.54                     | 40.19                 |
| 11001              | District of Columbia,<br>DC | 0.006                | 58.93                     | 59.65                 |

| <b>County FIPS</b> | <b>County Description</b> | <b>DOS-SVI Index</b> | <b>DOS-SVI Percentile</b> | <b>SVI Percentile</b> |
|--------------------|---------------------------|----------------------|---------------------------|-----------------------|
| 12001              | Alachua, FL               | 0.001                | 56.38                     | 47.29                 |
| 12003              | Baker, FL                 | 0.108                | 88.19                     | 68.03                 |
| 12005              | Bay, FL                   | -0.019               | 47.5                      | 60.76                 |
| 12007              | Bradford, FL              | 0.052                | 75.64                     | 92.64                 |
| 12009              | Brevard, FL               | -0.09                | 15.6                      | 37.13                 |
| 12011              | Broward, FL               | -0.026               | 44.35                     | 58.44                 |
| 12013              | Calhoun, FL               | 0.114                | 89.3                      | 84.01                 |
| 12015              | Charlotte, FL             | -0.191               | 0.96                      | 48.89                 |
| 12017              | Citrus, FL                | -0.097               | 13.05                     | 60.22                 |
| 12019              | Clay, FL                  | 0.037                | 70.81                     | 38.03                 |
| 12021              | Collier, FL               | -0.174               | 1.69                      | 46.18                 |
| 12023              | Columbia, FL              | 0.157                | 94.17                     | 85.96                 |
| 12027              | DeSoto, FL                | 0.044                | 73.51                     | 96.18                 |
| 12029              | Dixie, FL                 | 0.105                | 87.68                     | 89.94                 |
| 12031              | Duval, FL                 | -0.001               | 55.59                     | 69.2                  |
| 12033              | Escambia, FL              | -0.003               | 54.95                     | 48.63                 |
| 12035              | Flagler, FL               | -0.155               | 3.02                      | 27.99                 |
| 12037              | Franklin, FL              | 0.043                | 72.91                     | 80.83                 |
| 12039              | Gadsden, FL               | 0.102                | 86.92                     | 99.01                 |
| 12041              | Gilchrist, FL             | 0.062                | 78.45                     | 75.67                 |
| 12043              | Glades, FL                | 0.111                | 88.54                     | 90.48                 |
| 12045              | Gulf, FL                  | -0.001               | 55.78                     | 59.2                  |
| 12047              | Hamilton, FL              | 0.27                 | 98.5                      | 99.08                 |
| 12049              | Hardee, FL                | 0.19                 | 96.47                     | 98.31                 |
| 12051              | Hendry, FL                | 0.211                | 97.17                     | 99.39                 |
| 12053              | Hernando, FL              | -0.068               | 24.32                     | 54.9                  |
| 12055              | Highlands, FL             | 0.004                | 57.75                     | 87.29                 |
| 12057              | Hillsborough, FL          | 0.003                | 57.5                      | 67.01                 |
| 12059              | Holmes, FL                | 0.127                | 90.8                      | 93.47                 |
| 12061              | Indian River, FL          | -0.135               | 5.13                      | 39.62                 |
| 12063              | Jackson, FL               | 0.118                | 89.72                     | 95.83                 |
| 12065              | Jefferson, FL             | -0.003               | 54.73                     | 57.48                 |
| 12067              | Lafayette, FL             | 0.34                 | 99.05                     | 98.06                 |
| 12069              | Lake, FL                  | -0.054               | 30.5                      | 60.29                 |
| 12071              | Lee, FL                   | -0.125               | 6.81                      | 55.25                 |
| 12073              | Leon, FL                  | 0.026                | 67.24                     | 49.43                 |
| 12075              | Levy, FL                  | 0.066                | 79.5                      | 77.93                 |
| 12077              | Liberty, FL               | 0.173                | 95.26                     | 83.34                 |
| 12079              | Madison, FL               | 0.102                | 86.95                     | 96.08                 |
| 12081              | Manatee, FL               | -0.089               | 16.11                     | 51.97                 |
| 12083              | Marion, FL                | -0.025               | 44.6                      | 75.35                 |
| 12085              | Martin, FL                | -0.155               | 2.99                      | 39.9                  |
| 12086              | Miami-Dade, FL            | -0.031               | 41.9                      | 81.75                 |
| 12087              | Monroe, FL                | -0.111               | 10.03                     | 45.57                 |
| 12089              | Nassau, FL                | -0.077               | 20.18                     | 24.59                 |
| 12091              | Okaloosa, FL              | -0.026               | 44.38                     | 38.6                  |
| 12093              | Okeechobee, FL            | 0.115                | 89.37                     | 94.65                 |
| 12095              | Orange, FL                | 0.002                | 56.96                     | 66.91                 |
| 12097              | Osceola, FL               | 0.03                 | 68.58                     | 81.78                 |
| 12099              | Palm Beach, FL            | -0.093               | 14.26                     | 55.92                 |
| 12101              | Pasco, FL                 | -0.031               | 42.22                     | 63.44                 |
| 12103              | Pinellas, FL              | -0.118               | 8.21                      | 51.69                 |
| 12105              | Polk, FL                  | 0.04                 | 71.92                     | 90.35                 |
| 12107              | Putnam, FL                | 0.142                | 92.52                     | 95.25                 |
| 12109              | St. Johns, FL             | -0.078               | 19.83                     | 7.61                  |

| <b>County FIPS</b> | <b>County Description</b> | <b>DOS-SVI Index</b> | <b>DOS-SVI Percentile</b> | <b>SVI Percentile</b> |
|--------------------|---------------------------|----------------------|---------------------------|-----------------------|
| 12111              | St. Lucie, FL             | -0.059               | 28.11                     | 71.85                 |
| 12113              | Santa Rosa, FL            | -0.009               | 52.31                     | 30.96                 |
| 12115              | Sarasota, FL              | -0.23                | 0.35                      | 25.38                 |
| 12117              | Seminole, FL              | -0.037               | 38.84                     | 18.44                 |
| 12119              | Sumter, FL                | -0.364               | 0.03                      | 23.6                  |
| 12121              | Suwannee, FL              | 0.114                | 89.27                     | 94.24                 |
| 12123              | Taylor, FL                | 0.102                | 86.88                     | 89.84                 |
| 12125              | Union, FL                 | 0.187                | 96.12                     | 83.82                 |
| 12127              | Volusia, FL               | -0.108               | 10.63                     | 53.47                 |
| 12129              | Wakulla, FL               | 0.059                | 77.75                     | 40.32                 |
| 12131              | Walton, FL                | -0.032               | 41.74                     | 58.22                 |
| 12133              | Washington, FL            | 0.125                | 90.58                     | 89.39                 |
| 13001              | Appling, GA               | 0.092                | 85.26                     | 96.69                 |
| 13003              | Atkinson, GA              | 0.204                | 96.97                     | 96.15                 |
| 13005              | Bacon, GA                 | 0.091                | 85.07                     | 93.89                 |
| 13007              | Baker, GA                 | 0.033                | 69.31                     | 74.24                 |
| 13009              | Baldwin, GA               | 0.097                | 86.06                     | 86.66                 |
| 13011              | Banks, GA                 | 0.051                | 75.42                     | 55.86                 |
| 13013              | Barrow, GA                | 0.018                | 63.87                     | 42.04                 |
| 13015              | Bartow, GA                | 0.032                | 69.21                     | 59.14                 |
| 13017              | Ben Hill, GA              | 0.001                | 56.29                     | 87.26                 |
| 13019              | Berrien, GA               | 0.128                | 90.96                     | 85                    |
| 13021              | Bibb, GA                  | 0.045                | 73.64                     | 91.75                 |
| 13023              | Bleckley, GA              | 0.064                | 79.11                     | 73.95                 |
| 13025              | Brantley, GA              | 0.155                | 94.08                     | 62.29                 |
| 13027              | Brooks, GA                | 0.146                | 93.25                     | 83.98                 |
| 13029              | Bryan, GA                 | 0.064                | 79.02                     | 33.89                 |
| 13031              | Bulloch, GA               | 0.105                | 87.58                     | 81.21                 |
| 13033              | Burke, GA                 | 0.106                | 87.78                     | 84.55                 |
| 13035              | Butts, GA                 | 0.038                | 71.19                     | 76.53                 |
| 13037              | Calhoun, GA               | 0.222                | 97.48                     | 97.74                 |
| 13039              | Camden, GA                | 0.058                | 77.33                     | 51.59                 |
| 13043              | Candler, GA               | 0.122                | 90.19                     | 98.28                 |
| 13045              | Carroll, GA               | 0.061                | 78.32                     | 78.25                 |
| 13047              | Catoosa, GA               | -0.036               | 39.8                      | 13.18                 |
| 13049              | Charlton, GA              | 0.195                | 96.72                     | 87.52                 |
| 13051              | Chatham, GA               | 0.005                | 58.68                     | 69.49                 |
| 13053              | Chattahoochee, GA         | 0.237                | 97.87                     | 63.79                 |
| 13055              | Chattooga, GA             | 0.179                | 95.77                     | 92.52                 |
| 13057              | Cherokee, GA              | -0.018               | 47.82                     | 11.85                 |
| 13059              | Clarke, GA                | 0.025                | 66.89                     | 76.75                 |
| 13061              | Clay, GA                  | 0.24                 | 97.9                      | 93.09                 |
| 13063              | Clayton, GA               | 0.094                | 85.58                     | 91.02                 |
| 13065              | Clinch, GA                | 0.161                | 94.59                     | 97.77                 |
| 13067              | Cobb, GA                  | -0.029               | 43.11                     | 26.69                 |
| 13069              | Coffee, GA                | 0.078                | 82.46                     | 95.06                 |
| 13071              | Colquitt, GA              | 0.112                | 88.98                     | 98.12                 |
| 13073              | Columbia, GA              | -0.006               | 53.52                     | 13.34                 |
| 13075              | Cook, GA                  | 0.081                | 83.09                     | 85.1                  |
| 13077              | Coweta, GA                | -0.022               | 45.65                     | 24.27                 |
| 13079              | Crawford, GA              | 0.152                | 93.86                     | 68.15                 |
| 13081              | Crisp, GA                 | 0.16                 | 94.33                     | 98.57                 |
| 13083              | Dade, GA                  | 0.006                | 59.06                     | 51.56                 |
| 13085              | Dawson, GA                | -0.05                | 32.38                     | 10.38                 |
| 13087              | Decatur, GA               | 0.11                 | 88.44                     | 94.55                 |



| <b>County FIPS</b> | <b>County Description</b> | <b>DOS-SVI Index</b> | <b>DOS-SVI Percentile</b> | <b>SVI Percentile</b> |
|--------------------|---------------------------|----------------------|---------------------------|-----------------------|
| 13089              | DeKalb, GA                | 0.01                 | 60.65                     | 66.11                 |
| 13091              | Dodge, GA                 | 0.077                | 82.2                      | 92.23                 |
| 13093              | Dooly, GA                 | 0.144                | 92.87                     | 94.84                 |
| 13095              | Dougherty, GA             | 0.142                | 92.58                     | 95.13                 |
| 13097              | Douglas, GA               | 0.03                 | 68.39                     | 54.04                 |
| 13099              | Early, GA                 | 0.134                | 91.75                     | 92.01                 |
| 13101              | Echols, GA                | 0.115                | 89.43                     | 66.15                 |
| 13103              | Effingham, GA             | 0.039                | 71.79                     | 23.63                 |
| 13105              | Elbert, GA                | 0.035                | 70.11                     | 83.38                 |
| 13107              | Emanuel, GA               | 0.085                | 83.8                      | 97.68                 |
| 13109              | Evans, GA                 | 0.121                | 90.07                     | 98.47                 |
| 13111              | Fannin, GA                | -0.098               | 13.02                     | 30.03                 |
| 13113              | Fayette, GA               | -0.062               | 26.74                     | 6.08                  |
| 13115              | Floyd, GA                 | 0.019                | 64.31                     | 88.54                 |
| 13117              | Forsyth, GA               | -0.008               | 52.5                      | 3.73                  |
| 13119              | Franklin, GA              | 0.018                | 63.96                     | 84.62                 |
| 13121              | Fulton, GA                | -0.017               | 48.14                     | 52.68                 |
| 13123              | Gilmer, GA                | -0.041               | 36.87                     | 55.99                 |
| 13125              | Glascock, GA              | 0.113                | 89.08                     | 68.6                  |
| 13127              | Glynn, GA                 | -0.048               | 33.59                     | 71.59                 |
| 13129              | Gordon, GA                | 0.024                | 66.19                     | 88.06                 |
| 13131              | Grady, GA                 | 0.068                | 80.1                      | 92.58                 |
| 13133              | Greene, GA                | -0.125               | 6.78                      | 53.79                 |
| 13135              | Gwinnett, GA              | 0.019                | 64.47                     | 43.47                 |
| 13137              | Habersham, GA             | 0.001                | 56.32                     | 71.46                 |
| 13139              | Hall, GA                  | 0.035                | 70.17                     | 66.18                 |
| 13141              | Hancock, GA               | 0.015                | 62.34                     | 79.84                 |
| 13143              | Haralson, GA              | 0                    | 56.06                     | 54.27                 |
| 13145              | Harris, GA                | -0.008               | 52.69                     | 13.41                 |
| 13147              | Hart, GA                  | -0.036               | 39.6                      | 71.94                 |
| 13149              | Heard, GA                 | 0.124                | 90.51                     | 72.32                 |
| 13151              | Henry, GA                 | 0.007                | 59.25                     | 31.37                 |
| 13153              | Houston, GA               | 0.064                | 78.99                     | 56.69                 |
| 13155              | Irwin, GA                 | 0.072                | 80.93                     | 84.08                 |
| 13157              | Jackson, GA               | 0.015                | 62.53                     | 35.16                 |
| 13159              | Jasper, GA                | 0.096                | 85.86                     | 69.27                 |
| 13161              | Jeff Davis, GA            | 0.135                | 91.98                     | 93.73                 |
| 13163              | Jefferson, GA             | 0.098                | 86.47                     | 94.39                 |
| 13165              | Jenkins, GA               | 0.037                | 70.87                     | 82.83                 |
| 13167              | Johnson, GA               | 0.149                | 93.57                     | 90.61                 |
| 13169              | Jones, GA                 | 0.05                 | 75.23                     | 37.93                 |
| 13171              | Lamar, GA                 | 0.116                | 89.53                     | 49.17                 |
| 13173              | Lanier, GA                | 0.111                | 88.51                     | 86.97                 |
| 13175              | Laurens, GA               | 0.041                | 72.11                     | 80.13                 |
| 13177              | Lee, GA                   | 0.08                 | 82.68                     | 35.19                 |
| 13179              | Liberty, GA               | 0.193                | 96.59                     | 88.82                 |
| 13181              | Lincoln, GA               | -0.029               | 43.2                      | 55.64                 |
| 13183              | Long, GA                  | 0.303                | 98.79                     | 82.71                 |
| 13185              | Lowndes, GA               | 0.091                | 85.13                     | 86.62                 |
| 13187              | Lumpkin, GA               | -0.034               | 41.07                     | 43.38                 |
| 13189              | McDuffie, GA              | 0.059                | 77.78                     | 93.76                 |
| 13191              | McIntosh, GA              | -0.016               | 48.46                     | 58.63                 |
| 13193              | Macon, GA                 | 0.178                | 95.67                     | 93.12                 |
| 13195              | Madison, GA               | 0.113                | 89.05                     | 64.17                 |
| 13197              | Marion, GA                | 0.105                | 87.65                     | 85.19                 |

| <b>County FIPS</b> | <b>County Description</b> | <b>DOS-SVI Index</b> | <b>DOS-SVI Percentile</b> | <b>SVI Percentile</b> |
|--------------------|---------------------------|----------------------|---------------------------|-----------------------|
| 13199              | Meriwether, GA            | -0.001               | 55.84                     | 87.01                 |
| 13201              | Miller, GA                | 0.086                | 84.05                     | 77.99                 |
| 13205              | Mitchell, GA              | 0.195                | 96.69                     | 98.79                 |
| 13207              | Monroe, GA                | 0.054                | 76.25                     | 45.96                 |
| 13209              | Montgomery, GA            | 0.112                | 88.92                     | 84.65                 |
| 13211              | Morgan, GA                | -0.025               | 44.44                     | 24.46                 |
| 13213              | Murray, GA                | 0.152                | 93.82                     | 71.34                 |
| 13215              | Muscogee, GA              | 0.059                | 77.65                     | 90.03                 |
| 13217              | Newton, GA                | 0.06                 | 77.87                     | 70.7                  |
| 13219              | Oconee, GA                | -0.036               | 39.83                     | 3.54                  |
| 13221              | Oglethorpe, GA            | 0.015                | 62.43                     | 52.17                 |
| 13223              | Paulding, GA              | 0.008                | 59.88                     | 13.76                 |
| 13225              | Peach, GA                 | 0.065                | 79.27                     | 94.04                 |
| 13227              | Pickens, GA               | -0.006               | 53.04                     | 27.96                 |
| 13229              | Pierce, GA                | 0.035                | 70.14                     | 65.7                  |
| 13231              | Pike, GA                  | 0.054                | 76.06                     | 15.1                  |
| 13233              | Polk, GA                  | 0.038                | 71.47                     | 80.48                 |
| 13235              | Pulaski, GA               | -0.059               | 28.34                     | 84.59                 |
| 13237              | Putnam, GA                | -0.045               | 35.15                     | 42.8                  |
| 13239              | Quitman, GA               | 0.146                | 93.12                     | 94.33                 |
| 13241              | Rabun, GA                 | -0.114               | 9.33                      | 53.41                 |
| 13243              | Randolph, GA              | 0.087                | 84.21                     | 97.39                 |
| 13245              | Richmond, GA              | 0.093                | 85.39                     | 93.28                 |
| 13247              | Rockdale, GA              | 0.017                | 63.13                     | 55.29                 |
| 13249              | Schley, GA                | 0.189                | 96.34                     | 82.48                 |
| 13251              | Screven, GA               | 0.09                 | 84.85                     | 85.25                 |
| 13253              | Seminole, GA              | 0.09                 | 84.91                     | 83.44                 |
| 13255              | Spalding, GA              | 0.008                | 59.63                     | 86.91                 |
| 13257              | Stephens, GA              | 0.095                | 85.74                     | 79.68                 |
| 13259              | Stewart, GA               | 0.089                | 84.72                     | 92.45                 |
| 13261              | Sumter, GA                | 0.089                | 84.59                     | 97.64                 |
| 13263              | Talbot, GA                | 0.057                | 77.11                     | 85.89                 |
| 13265              | Taliaferro, GA            | 0.058                | 77.46                     | 90.89                 |
| 13267              | Tattall, GA               | 0.105                | 87.61                     | 90.8                  |
| 13269              | Taylor, GA                | 0.184                | 96.02                     | 91.97                 |
| 13271              | Telfair, GA               | -0.022               | 46                        | 83.69                 |
| 13273              | Terrell, GA               | 0.072                | 81.03                     | 95.7                  |
| 13275              | Thomas, GA                | 0.063                | 78.7                      | 91.08                 |
| 13277              | Tift, GA                  | 0.011                | 60.84                     | 88.09                 |
| 13279              | Toombs, GA                | 0.162                | 94.62                     | 97.61                 |
| 13281              | Towns, GA                 | -0.178               | 1.43                      | 32.58                 |
| 13283              | Treutlen, GA              | 0.077                | 82.27                     | 94.71                 |
| 13285              | Troup, GA                 | 0.037                | 70.93                     | 90.13                 |
| 13287              | Turner, GA                | 0.03                 | 68.77                     | 98.09                 |
| 13289              | Twiggs, GA                | 0.013                | 61.57                     | 75.8                  |
| 13291              | Union, GA                 | -0.188               | 1.02                      | 31.15                 |
| 13293              | Upson, GA                 | 0.072                | 80.9                      | 85.32                 |
| 13295              | Walker, GA                | 0.01                 | 60.55                     | 64.08                 |
| 13297              | Walton, GA                | 0.004                | 58.26                     | 29.3                  |
| 13299              | Ware, GA                  | -0.01                | 51.67                     | 84.49                 |
| 13301              | Warren, GA                | 0.053                | 75.96                     | 89.46                 |
| 13303              | Washington, GA            | 0.104                | 87.33                     | 94.62                 |
| 13305              | Wayne, GA                 | 0.15                 | 93.7                      | 91.66                 |
| 13307              | Webster, GA               | -0.045               | 35.12                     | 78.76                 |
| 13309              | Wheeler, GA               | 0.245                | 98.03                     | 81.24                 |

| <b>County FIPS</b> | <b>County Description</b> | <b>DOS-SVI Index</b> | <b>DOS-SVI Percentile</b> | <b>SVI Percentile</b> |
|--------------------|---------------------------|----------------------|---------------------------|-----------------------|
| 13311              | White, GA                 | -0.062               | 26.52                     | 23.57                 |
| 13313              | Whitfield, GA             | 0.121                | 90.16                     | 87.93                 |
| 13315              | Wilcox, GA                | 0.107                | 88.06                     | 81.69                 |
| 13317              | Wilkes, GA                | -0.083               | 18.18                     | 75.61                 |
| 13319              | Wilkinson, GA             | 0.097                | 86.02                     | 78.73                 |
| 13321              | Worth, GA                 | 0.012                | 61.25                     | 73.57                 |
| 15001              | Hawaii, HI                | 0.042                | 72.81                     | 57.71                 |
| 15003              | Honolulu, HI              | 0.062                | 78.51                     | 47.2                  |
| 15005              | Kalawao, HI               | -0.199               | 0.64                      | 31.62                 |
| 15007              | Kauai, HI                 | 0.027                | 67.65                     | 30.99                 |
| 15009              | Maui, HI                  | 0.087                | 84.37                     | 38.79                 |
| 16001              | Ada, ID                   | -0.035               | 40.27                     | 13.73                 |
| 16003              | Adams, ID                 | 0.003                | 57.05                     | 29.36                 |
| 16005              | Bannock, ID               | 0.061                | 78.16                     | 57.9                  |
| 16007              | Bear Lake, ID             | -0.046               | 34.77                     | 21.43                 |
| 16009              | Benewah, ID               | 0.118                | 89.75                     | 73.34                 |
| 16011              | Bingham, ID               | 0.079                | 82.49                     | 50.7                  |
| 16013              | Blaine, ID                | -0.129               | 5.95                      | 32.39                 |
| 16015              | Boise, ID                 | -0.065               | 25.31                     | 6.72                  |
| 16017              | Bonner, ID                | -0.084               | 17.77                     | 24.01                 |
| 16019              | Bonneville, ID            | 0.042                | 72.62                     | 36.34                 |
| 16021              | Boundary, ID              | -0.013               | 49.76                     | 30.83                 |
| 16023              | Butte, ID                 | -0.012               | 50.52                     | 24.62                 |
| 16025              | Camas, ID                 | -0.071               | 22.64                     | 13.38                 |
| 16027              | Canyon, ID                | 0.109                | 88.25                     | 73.66                 |
| 16029              | Caribou, ID               | 0.001                | 56.41                     | 19.17                 |
| 16031              | Cassia, ID                | 0.047                | 73.99                     | 67.32                 |
| 16033              | Clark, ID                 | 0.323                | 98.92                     | 89.11                 |
| 16035              | Clearwater, ID            | -0.058               | 28.53                     | 44.01                 |
| 16037              | Custer, ID                | -0.126               | 6.62                      | 43.69                 |
| 16039              | Elmore, ID                | 0.063                | 78.77                     | 58.82                 |
| 16041              | Franklin, ID              | 0.039                | 71.73                     | 14.14                 |
| 16043              | Fremont, ID               | 0.109                | 88.32                     | 51.37                 |
| 16045              | Gem, ID                   | -0.056               | 29.93                     | 66.27                 |
| 16047              | Gooding, ID               | 0.075                | 81.92                     | 70.76                 |
| 16049              | Idaho, ID                 | -0.018               | 47.85                     | 53.92                 |
| 16051              | Jefferson, ID             | 0.144                | 92.93                     | 25.25                 |
| 16053              | Jerome, ID                | 0.104                | 87.36                     | 67.36                 |
| 16055              | Kootenai, ID              | -0.039               | 37.89                     | 23.28                 |
| 16057              | Latah, ID                 | 0.012                | 61.13                     | 24.84                 |
| 16059              | Lemhi, ID                 | -0.085               | 17.67                     | 29.97                 |
| 16061              | Lewis, ID                 | -0.002               | 55.27                     | 56.78                 |
| 16063              | Lincoln, ID               | 0.137                | 92.23                     | 55.76                 |
| 16065              | Madison, ID               | 0.25                 | 98.15                     | 40.29                 |
| 16067              | Minidoka, ID              | 0.002                | 56.8                      | 67.83                 |
| 16069              | Nez Perce, ID             | -0.053               | 30.85                     | 50.67                 |
| 16071              | Oneida, ID                | 0.044                | 73.35                     | 34.24                 |
| 16073              | Owyhee, ID                | 0.086                | 84.11                     | 82.45                 |
| 16075              | Payette, ID               | 0.098                | 86.34                     | 60.1                  |
| 16077              | Power, ID                 | 0.101                | 86.79                     | 51.62                 |
| 16079              | Shoshone, ID              | 0.015                | 62.62                     | 75.7                  |
| 16081              | Teton, ID                 | 0.082                | 83.25                     | 13.44                 |
| 16083              | Twin Falls, ID            | 0.004                | 57.66                     | 49.55                 |
| 16085              | Valley, ID                | -0.115               | 9.23                      | 8.82                  |
| 16087              | Washington, ID            | -0.073               | 22.03                     | 85.06                 |

| <b>County FIPS</b> | <b>County Description</b> | <b>DOS-SVI Index</b> | <b>DOS-SVI Percentile</b> | <b>SVI Percentile</b> |
|--------------------|---------------------------|----------------------|---------------------------|-----------------------|
| 17001              | Adams, IL                 | -0.079               | 19.45                     | 24.9                  |
| 17003              | Alexander, IL             | -0.017               | 48.11                     | 95.73                 |
| 17005              | Bond, IL                  | 0.004                | 58.04                     | 37.32                 |
| 17007              | Boone, IL                 | 0.027                | 67.59                     | 46.97                 |
| 17009              | Brown, IL                 | 0.014                | 62.05                     | 47.45                 |
| 17011              | Bureau, IL                | -0.096               | 13.44                     | 28.63                 |
| 17013              | Calhoun, IL               | -0.048               | 33.46                     | 19.01                 |
| 17015              | Carroll, IL               | -0.091               | 15.35                     | 16.82                 |
| 17017              | Cass, IL                  | 0.006                | 59.03                     | 69.71                 |
| 17019              | Champaign, IL             | 0.038                | 71.44                     | 49.9                  |
| 17021              | Christian, IL             | -0.105               | 11.37                     | 24.08                 |
| 17023              | Clark, IL                 | -0.028               | 43.55                     | 20.73                 |
| 17025              | Clay, IL                  | -0.009               | 52.28                     | 61.15                 |
| 17027              | Clinton, IL               | -0.052               | 31.65                     | 17.87                 |
| 17029              | Coles, IL                 | -0.059               | 27.98                     | 49.78                 |
| 17031              | Cook, IL                  | 0.023                | 66                        | 67.55                 |
| 17033              | Crawford, IL              | -0.04                | 37.7                      | 38.38                 |
| 17035              | Cumberland, IL            | -0.054               | 30.69                     | 16.27                 |
| 17037              | DeKalb, IL                | 0.017                | 63.32                     | 48.66                 |
| 17039              | De Witt, IL               | -0.048               | 33.56                     | 12.9                  |
| 17041              | Douglas, IL               | -0.012               | 50.37                     | 44.39                 |
| 17043              | DuPage, IL                | -0.045               | 35.27                     | 16.11                 |
| 17045              | Edgar, IL                 | -0.09                | 15.73                     | 34.33                 |
| 17047              | Edwards, IL               | -0.008               | 52.59                     | 24.43                 |
| 17049              | Effingham, IL             | -0.042               | 36.61                     | 19.9                  |
| 17051              | Fayette, IL               | 0.018                | 63.77                     | 59.49                 |
| 17053              | Ford, IL                  | -0.075               | 21.08                     | 30.51                 |
| 17055              | Franklin, IL              | 0.012                | 61.32                     | 60.92                 |
| 17057              | Fulton, IL                | -0.06                | 27.92                     | 57.61                 |
| 17059              | Gallatin, IL              | -0.103               | 11.68                     | 45.38                 |
| 17061              | Greene, IL                | -0.069               | 23.91                     | 19.52                 |
| 17063              | Grundy, IL                | -0.009               | 52.24                     | 8.44                  |
| 17065              | Hamilton, IL              | -0.082               | 18.59                     | 15.29                 |
| 17067              | Hancock, IL               | -0.059               | 28.05                     | 12.32                 |
| 17069              | Hardin, IL                | 0.15                 | 93.66                     | 50.19                 |
| 17071              | Henderson, IL             | -0.098               | 12.73                     | 6.69                  |
| 17073              | Henry, IL                 | -0.082               | 18.5                      | 20.1                  |
| 17075              | Iroquois, IL              | -0.058               | 28.56                     | 34.04                 |
| 17077              | Jackson, IL               | 0.047                | 74.08                     | 70.45                 |
| 17079              | Jasper, IL                | -0.031               | 42.09                     | 24.17                 |
| 17081              | Jefferson, IL             | 0.013                | 61.76                     | 81.08                 |
| 17083              | Jersey, IL                | -0.07                | 23.05                     | 10.41                 |
| 17085              | Jo Daviess, IL            | -0.136               | 5                         | 5.25                  |
| 17087              | Johnson, IL               | -0.008               | 52.79                     | 46.24                 |
| 17089              | Kane, IL                  | 0.022                | 65.39                     | 41.69                 |
| 17091              | Kankakee, IL              | -0.012               | 50.72                     | 66.56                 |
| 17093              | Kendall, IL               | 0.025                | 66.67                     | 13.98                 |
| 17095              | Knox, IL                  | -0.057               | 29.2                      | 64.62                 |
| 17097              | Lake, IL                  | -0.01                | 51.7                      | 35.13                 |
| 17099              | LaSalle, IL               | -0.037               | 39.29                     | 43.03                 |
| 17101              | Lawrence, IL              | 0.03                 | 68.45                     | 77.83                 |
| 17103              | Lee, IL                   | -0.073               | 21.84                     | 30.1                  |
| 17105              | Livingston, IL            | -0.058               | 28.46                     | 48.41                 |
| 17107              | Logan, IL                 | -0.048               | 33.3                      | 22.71                 |
| 17109              | McDonough, IL             | 0.002                | 56.92                     | 51.66                 |

| <b>County FIPS</b> | <b>County Description</b> | <b>DOS-SVI Index</b> | <b>DOS-SVI Percentile</b> | <b>SVI Percentile</b> |
|--------------------|---------------------------|----------------------|---------------------------|-----------------------|
| 17111              | McHenry, IL               | -0.039               | 37.92                     | 7.01                  |
| 17113              | McLean, IL                | -0.047               | 33.75                     | 19.04                 |
| 17115              | Macon, IL                 | -0.025               | 44.7                      | 59.71                 |
| 17117              | Macoupin, IL              | -0.024               | 44.92                     | 19.87                 |
| 17119              | Madison, IL               | -0.019               | 47.25                     | 29.65                 |
| 17121              | Marion, IL                | 0.049                | 74.98                     | 73.85                 |
| 17123              | Marshall, IL              | -0.083               | 18.11                     | 5.45                  |
| 17125              | Mason, IL                 | -0.041               | 37.38                     | 29.46                 |
| 17127              | Massac, IL                | -0.008               | 52.56                     | 75.13                 |
| 17129              | Menard, IL                | -0.076               | 20.57                     | 4.84                  |
| 17131              | Mercer, IL                | -0.084               | 17.96                     | 11.34                 |
| 17133              | Monroe, IL                | -0.091               | 15.28                     | 0.16                  |
| 17135              | Montgomery, IL            | -0.047               | 33.88                     | 39.14                 |
| 17137              | Morgan, IL                | -0.065               | 25.21                     | 50.45                 |
| 17139              | Moultrie, IL              | -0.016               | 48.74                     | 29.49                 |
| 17141              | Ogle, IL                  | -0.035               | 40.08                     | 29.17                 |
| 17143              | Peoria, IL                | -0.013               | 49.89                     | 61.31                 |
| 17145              | Perry, IL                 | -0.02                | 47.02                     | 64.87                 |
| 17147              | Piatt, IL                 | -0.093               | 14.58                     | 0.32                  |
| 17149              | Pike, IL                  | -0.053               | 31.01                     | 34.94                 |
| 17151              | Pope, IL                  | 0.08                 | 82.9                      | 45.45                 |
| 17153              | Pulaski, IL               | 0.054                | 76.12                     | 69.43                 |
| 17155              | Putnam, IL                | -0.131               | 5.7                       | 2.77                  |
| 17157              | Randolph, IL              | -0.041               | 37.34                     | 45.67                 |
| 17159              | Richland, IL              | -0.047               | 34.29                     | 41.05                 |
| 17161              | Rock Island, IL           | -0.047               | 33.94                     | 71.37                 |
| 17163              | St. Clair, IL             | 0.002                | 56.86                     | 52.29                 |
| 17165              | Saline, IL                | 0.036                | 70.61                     | 86.37                 |
| 17167              | Sangamon, IL              | -0.035               | 39.92                     | 43.57                 |
| 17169              | Schuyler, IL              | -0.083               | 18.31                     | 57.07                 |
| 17171              | Scott, IL                 | -0.007               | 52.91                     | 13.54                 |
| 17173              | Shelby, IL                | -0.057               | 29.26                     | 8.5                   |
| 17175              | Stark, IL                 | -0.119               | 7.99                      | 6.34                  |
| 17177              | Stephenson, IL            | -0.088               | 16.59                     | 50                    |
| 17179              | Tazewell, IL              | -0.076               | 20.63                     | 10.7                  |
| 17181              | Union, IL                 | 0.004                | 57.98                     | 68.44                 |
| 17183              | Vermilion, IL             | -0.007               | 52.98                     | 81.31                 |
| 17185              | Wabash, IL                | -0.029               | 43.04                     | 32.07                 |
| 17187              | Warren, IL                | 0.02                 | 64.6                      | 60.73                 |
| 17189              | Washington, IL            | -0.05                | 32.31                     | 6.53                  |
| 17191              | Wayne, IL                 | -0.029               | 43.17                     | 43.31                 |
| 17193              | White, IL                 | -0.009               | 51.86                     | 53.82                 |
| 17195              | Whiteside, IL             | -0.077               | 20.38                     | 32.83                 |
| 17197              | Will, IL                  | -0.002               | 55.4                      | 20.22                 |
| 17199              | Williamson, IL            | -0.037               | 39.13                     | 48.06                 |
| 17201              | Winnebago, IL             | 0.016                | 62.72                     | 72.04                 |
| 17203              | Woodford, IL              | -0.056               | 29.77                     | 1.88                  |
| 18001              | Adams, IN                 | 0.078                | 82.43                     | 59.04                 |
| 18003              | Allen, IN                 | -0.019               | 47.6                      | 52.36                 |
| 18005              | Bartholomew, IN           | -0.01                | 51.58                     | 36.31                 |
| 18007              | Benton, IN                | -0.047               | 34.26                     | 33.47                 |
| 18009              | Blackford, IN             | -0.038               | 38.27                     | 37.1                  |
| 18011              | Boone, IN                 | -0.057               | 29.29                     | 4.49                  |
| 18013              | Brown, IN                 | -0.102               | 12.1                      | 6.02                  |
| 18015              | Carroll, IN               | -0.05                | 32.47                     | 11.75                 |

| <b>County FIPS</b> | <b>County Description</b> | <b>DOS-SVI Index</b> | <b>DOS-SVI Percentile</b> | <b>SVI Percentile</b> |
|--------------------|---------------------------|----------------------|---------------------------|-----------------------|
| 18017              | Cass, IN                  | -0.027               | 43.81                     | 71.97                 |
| 18019              | Clark, IN                 | -0.037               | 38.81                     | 25.48                 |
| 18021              | Clay, IN                  | -0.024               | 45.21                     | 33.38                 |
| 18023              | Clinton, IN               | -0.013               | 50.21                     | 57.1                  |
| 18025              | Crawford, IN              | -0.005               | 54.09                     | 38.89                 |
| 18027              | Daviess, IN               | 0.05                 | 75.14                     | 68.82                 |
| 18029              | Dearborn, IN              | -0.054               | 30.75                     | 7.99                  |
| 18031              | Decatur, IN               | -0.046               | 34.45                     | 21.02                 |
| 18033              | DeKalb, IN                | -0.052               | 31.45                     | 23.34                 |
| 18035              | Delaware, IN              | -0.029               | 43.33                     | 56.66                 |
| 18037              | Dubois, IN                | -0.071               | 22.8                      | 20.8                  |
| 18039              | Elkhart, IN               | 0.003                | 57.53                     | 77.01                 |
| 18041              | Fayette, IN               | -0.052               | 31.39                     | 61.08                 |
| 18043              | Floyd, IN                 | -0.078               | 19.87                     | 16.69                 |
| 18045              | Fountain, IN              | -0.026               | 44.19                     | 20.32                 |
| 18047              | Franklin, IN              | -0.054               | 30.63                     | 14.71                 |
| 18049              | Fulton, IN                | -0.036               | 39.89                     | 34.59                 |
| 18051              | Gibson, IN                | -0.034               | 40.53                     | 31.5                  |
| 18053              | Grant, IN                 | -0.036               | 39.76                     | 73.31                 |
| 18055              | Greene, IN                | 0.038                | 71.06                     | 44.43                 |
| 18057              | Hamilton, IN              | -0.05                | 32.51                     | 2.55                  |
| 18059              | Hancock, IN               | -0.09                | 15.57                     | 1.69                  |
| 18061              | Harrison, IN              | 0.008                | 59.82                     | 18.66                 |
| 18063              | Hendricks, IN             | -0.047               | 34.1                      | 8.15                  |
| 18065              | Henry, IN                 | -0.046               | 34.83                     | 37.93                 |
| 18067              | Howard, IN                | -0.068               | 24                        | 48.15                 |
| 18069              | Huntington, IN            | -0.061               | 26.93                     | 12.48                 |
| 18071              | Jackson, IN               | -0.024               | 44.99                     | 53.89                 |
| 18073              | Jasper, IN                | -0.038               | 38.4                      | 26.85                 |
| 18075              | Jay, IN                   | 0.019                | 64.12                     | 67.48                 |
| 18077              | Jefferson, IN             | -0.021               | 46.45                     | 44.14                 |
| 18079              | Jennings, IN              | 0.016                | 62.81                     | 38.47                 |
| 18081              | Johnson, IN               | -0.043               | 35.85                     | 14.24                 |
| 18083              | Knox, IN                  | -0.047               | 33.78                     | 59.27                 |
| 18085              | Kosciusko, IN             | -0.019               | 47.37                     | 46.08                 |
| 18087              | LaGrange, IN              | 0.071                | 80.77                     | 37.07                 |
| 18089              | Lake, IN                  | 0.013                | 61.41                     | 72.52                 |
| 18091              | LaPorte, IN               | 0.024                | 66.28                     | 72.17                 |
| 18093              | Lawrence, IN              | -0.05                | 32.41                     | 27.52                 |
| 18095              | Madison, IN               | -0.042               | 36.74                     | 67.13                 |
| 18097              | Marion, IN                | 0.015                | 62.3                      | 79.71                 |
| 18099              | Marshall, IN              | 0.04                 | 71.95                     | 57.96                 |
| 18101              | Martin, IN                | -0.057               | 29.13                     | 23.98                 |
| 18103              | Miami, IN                 | 0.011                | 60.9                      | 58.79                 |
| 18105              | Monroe, IN                | -0.007               | 52.95                     | 45.19                 |
| 18107              | Montgomery, IN            | -0.062               | 26.71                     | 36.85                 |
| 18109              | Morgan, IN                | -0.003               | 54.76                     | 21.56                 |
| 18111              | Newton, IN                | -0.046               | 34.35                     | 33.66                 |
| 18113              | Noble, IN                 | -0.003               | 54.82                     | 47.42                 |
| 18115              | Ohio, IN                  | -0.13                | 5.79                      | 2.52                  |
| 18117              | Orange, IN                | -0.024               | 44.89                     | 64.55                 |
| 18119              | Owen, IN                  | 0.023                | 66.09                     | 34.55                 |
| 18121              | Parke, IN                 | 0.041                | 72.4                      | 58.09                 |
| 18123              | Perry, IN                 | -0.083               | 18.34                     | 31.02                 |
| 18125              | Pike, IN                  | -0.045               | 34.96                     | 17.45                 |

| <b>County FIPS</b> | <b>County Description</b> | <b>DOS-SVI Index</b> | <b>DOS-SVI Percentile</b> | <b>SVI Percentile</b> |
|--------------------|---------------------------|----------------------|---------------------------|-----------------------|
| 18127              | Porter, IN                | -0.052               | 31.58                     | 14.78                 |
| 18129              | Posey, IN                 | -0.057               | 29                        | 1.05                  |
| 18131              | Pulaski, IN               | -0.006               | 53.2                      | 23.09                 |
| 18133              | Putnam, IN                | -0.016               | 48.97                     | 34.84                 |
| 18135              | Randolph, IN              | -0.065               | 25.47                     | 42.96                 |
| 18137              | Ripley, IN                | 0.014                | 61.83                     | 37.74                 |
| 18139              | Rush, IN                  | -0.06                | 27.86                     | 25.67                 |
| 18141              | St. Joseph, IN            | -0.031               | 41.87                     | 62.23                 |
| 18143              | Scott, IN                 | 0.008                | 59.76                     | 42.01                 |
| 18145              | Shelby, IN                | -0.055               | 30.37                     | 21.82                 |
| 18147              | Spencer, IN               | -0.049               | 32.86                     | 8.79                  |
| 18149              | Starke, IN                | 0.028                | 67.72                     | 34.17                 |
| 18151              | Steuben, IN               | -0.076               | 20.85                     | 27.1                  |
| 18153              | Sullivan, IN              | 0.002                | 57.02                     | 64.01                 |
| 18155              | Switzerland, IN           | 0.068                | 79.97                     | 62.71                 |
| 18157              | Tippecanoe, IN            | -0.01                | 51.61                     | 49.3                  |
| 18159              | Tipton, IN                | -0.09                | 15.76                     | 7.26                  |
| 18161              | Union, IN                 | -0.069               | 23.43                     | 17.13                 |
| 18163              | Vanderburgh, IN           | -0.06                | 27.51                     | 52.42                 |
| 18165              | Vermillion, IN            | -0.039               | 37.98                     | 45.03                 |
| 18167              | Vigo, IN                  | 0.016                | 62.85                     | 72.74                 |
| 18169              | Wabash, IN                | -0.081               | 18.75                     | 28.82                 |
| 18171              | Warren, IN                | -0.089               | 16.14                     | 7.8                   |
| 18173              | Warrick, IN               | -0.063               | 26.14                     | 6.78                  |
| 18175              | Washington, IN            | 0.014                | 61.86                     | 37.77                 |
| 18177              | Wayne, IN                 | -0.064               | 25.79                     | 71.05                 |
| 18179              | Wells, IN                 | -0.093               | 14.2                      | 14.39                 |
| 18181              | White, IN                 | -0.048               | 33.21                     | 24.39                 |
| 18183              | Whitley, IN               | -0.098               | 12.7                      | 3.15                  |
| 19001              | Adair, IA                 | -0.127               | 6.37                      | 5.38                  |
| 19003              | Adams, IA                 | -0.119               | 8.02                      | 3.76                  |
| 19005              | Allamakee, IA             | -0.071               | 22.67                     | 32.2                  |
| 19007              | Appanoose, IA             | -0.047               | 34.19                     | 37.83                 |
| 19009              | Audubon, IA               | -0.173               | 1.78                      | 2.26                  |
| 19011              | Benton, IA                | -0.092               | 14.96                     | 1.18                  |
| 19013              | Black Hawk, IA            | -0.063               | 26.27                     | 42.64                 |
| 19015              | Boone, IA                 | -0.067               | 24.67                     | 11.78                 |
| 19017              | Bremer, IA                | -0.106               | 10.95                     | 3.22                  |
| 19019              | Buchanan, IA              | -0.066               | 24.86                     | 6.62                  |
| 19021              | Buena Vista, IA           | 0.062                | 78.54                     | 74.08                 |
| 19023              | Butler, IA                | -0.113               | 9.77                      | 2.36                  |
| 19025              | Calhoun, IA               | -0.144               | 4.2                       | 15.8                  |
| 19027              | Carroll, IA               | -0.132               | 5.57                      | 4.55                  |
| 19029              | Cass, IA                  | -0.155               | 2.87                      | 19.81                 |
| 19031              | Cedar, IA                 | -0.093               | 14.45                     | 0.8                   |
| 19033              | Cerro Gordo, IA           | -0.123               | 7.29                      | 24.97                 |
| 19035              | Cherokee, IA              | -0.179               | 1.37                      | 17.01                 |
| 19037              | Chickasaw, IA             | -0.124               | 7                         | 5.99                  |
| 19039              | Clarke, IA                | -0.026               | 44.03                     | 48.47                 |
| 19041              | Clay, IA                  | -0.106               | 10.98                     | 34.39                 |
| 19043              | Clayton, IA               | -0.124               | 6.97                      | 18.41                 |
| 19045              | Clinton, IA               | -0.101               | 12.16                     | 26.46                 |
| 19047              | Crawford, IA              | 0.042                | 72.53                     | 85.51                 |
| 19049              | Dallas, IA                | -0.029               | 43.27                     | 5.96                  |
| 19051              | Davis, IA                 | 0.105                | 87.74                     | 35.03                 |

| <b>County FIPS</b> | <b>County Description</b> | <b>DOS-SVI Index</b> | <b>DOS-SVI Percentile</b> | <b>SVI Percentile</b> |
|--------------------|---------------------------|----------------------|---------------------------|-----------------------|
| 19053              | Decatur, IA               | -0.019               | 47.44                     | 68.22                 |
| 19055              | Delaware, IA              | -0.089               | 16.27                     | 3.44                  |
| 19057              | Des Moines, IA            | -0.09                | 15.54                     | 46.53                 |
| 19059              | Dickinson, IA             | -0.182               | 1.27                      | 9.17                  |
| 19061              | Dubuque, IA               | -0.067               | 24.83                     | 23.47                 |
| 19063              | Emmet, IA                 | -0.082               | 18.56                     | 39.46                 |
| 19065              | Fayette, IA               | -0.133               | 5.48                      | 22.52                 |
| 19067              | Floyd, IA                 | -0.118               | 8.34                      | 35.96                 |
| 19069              | Franklin, IA              | -0.11                | 10.16                     | 19.62                 |
| 19071              | Fremont, IA               | -0.085               | 17.61                     | 5.54                  |
| 19073              | Greene, IA                | -0.066               | 24.93                     | 19.78                 |
| 19075              | Grundy, IA                | -0.128               | 6.14                      | 0.38                  |
| 19077              | Guthrie, IA               | -0.115               | 9.07                      | 12.2                  |
| 19079              | Hamilton, IA              | -0.093               | 14.33                     | 11.53                 |
| 19081              | Hancock, IA               | -0.136               | 5.03                      | 7.13                  |
| 19083              | Hardin, IA                | -0.125               | 6.75                      | 12.42                 |
| 19085              | Harrison, IA              | -0.132               | 5.63                      | 6.46                  |
| 19087              | Henry, IA                 | -0.073               | 21.65                     | 31.34                 |
| 19089              | Howard, IA                | -0.118               | 8.25                      | 15.67                 |
| 19091              | Humboldt, IA              | -0.105               | 11.3                      | 14.46                 |
| 19093              | Ida, IA                   | -0.099               | 12.64                     | 8.66                  |
| 19095              | Iowa, IA                  | -0.091               | 15.09                     | 3.47                  |
| 19097              | Jackson, IA               | -0.093               | 14.68                     | 12.68                 |
| 19099              | Jasper, IA                | -0.054               | 30.72                     | 25.48                 |
| 19101              | Jefferson, IA             | -0.048               | 33.33                     | 48.95                 |
| 19103              | Johnson, IA               | -0.033               | 41.45                     | 26.75                 |
| 19105              | Jones, IA                 | -0.064               | 25.6                      | 19.24                 |
| 19107              | Keokuk, IA                | -0.077               | 20.22                     | 3.98                  |
| 19109              | Kossuth, IA               | -0.148               | 3.57                      | 10.48                 |
| 19111              | Lee, IA                   | -0.041               | 37.25                     | 50.41                 |
| 19113              | Linn, IA                  | -0.072               | 22.19                     | 18.06                 |
| 19115              | Louisa, IA                | 0                    | 55.87                     | 45.7                  |
| 19117              | Lucas, IA                 | -0.09                | 15.89                     | 27.55                 |
| 19119              | Lyon, IA                  | -0.077               | 20.15                     | 4.39                  |
| 19121              | Madison, IA               | -0.053               | 31.17                     | 2.04                  |
| 19123              | Mahaska, IA               | -0.031               | 42.02                     | 46.37                 |
| 19125              | Marion, IA                | -0.068               | 24.13                     | 19.49                 |
| 19127              | Marshall, IA              | -0.018               | 47.79                     | 68.63                 |
| 19129              | Mills, IA                 | -0.061               | 26.97                     | 10.76                 |
| 19131              | Mitchell, IA              | -0.107               | 10.73                     | 8.6                   |
| 19133              | Monona, IA                | -0.157               | 2.67                      | 17.96                 |
| 19135              | Monroe, IA                | 0.008                | 59.47                     | 25.19                 |
| 19137              | Montgomery, IA            | -0.053               | 31.2                      | 52.8                  |
| 19139              | Muscatine, IA             | -0.076               | 20.82                     | 39.04                 |
| 19141              | O'Brien, IA               | -0.105               | 11.14                     | 23.22                 |
| 19143              | Osceola, IA               | -0.09                | 15.98                     | 26.34                 |
| 19145              | Page, IA                  | -0.111               | 10                        | 33.41                 |
| 19147              | Palo Alto, IA             | -0.142               | 4.36                      | 17.29                 |
| 19149              | Plymouth, IA              | -0.114               | 9.39                      | 12.71                 |
| 19151              | Pocahontas, IA            | -0.129               | 6.11                      | 14.62                 |
| 19153              | Polk, IA                  | -0.029               | 43.3                      | 37.68                 |
| 19155              | Pottawattamie, IA         | -0.061               | 27.28                     | 45.99                 |
| 19157              | Poweshiek, IA             | -0.098               | 12.86                     | 15.48                 |
| 19159              | Ringgold, IA              | -0.092               | 15.03                     | 12.99                 |
| 19161              | Sac, IA                   | -0.153               | 3.15                      | 7.48                  |



| <b>County FIPS</b> | <b>County Description</b> | <b>DOS-SVI Index</b> | <b>DOS-SVI Percentile</b> | <b>SVI Percentile</b> |
|--------------------|---------------------------|----------------------|---------------------------|-----------------------|
| 19163              | Scott, IA                 | -0.063               | 26.17                     | 26.59                 |
| 19165              | Shelby, IA                | -0.132               | 5.6                       | 13.03                 |
| 19167              | Sioux, IA                 | -0.004               | 54.22                     | 22.07                 |
| 19169              | Story, IA                 | -0.037               | 38.91                     | 21.24                 |
| 19171              | Tama, IA                  | -0.051               | 32.09                     | 32.74                 |
| 19173              | Taylor, IA                | -0.091               | 15.15                     | 27.71                 |
| 19175              | Union, IA                 | -0.069               | 23.81                     | 44.55                 |
| 19177              | Van Buren, IA             | -0.012               | 50.49                     | 24.65                 |
| 19179              | Wapello, IA               | -0.011               | 50.94                     | 74.39                 |
| 19181              | Warren, IA                | -0.067               | 24.74                     | 7.2                   |
| 19183              | Washington, IA            | -0.064               | 25.95                     | 22.39                 |
| 19185              | Wayne, IA                 | -0.033               | 41.29                     | 45.83                 |
| 19187              | Webster, IA               | -0.084               | 18.02                     | 45.8                  |
| 19189              | Winnebago, IA             | -0.093               | 14.64                     | 20.61                 |
| 19191              | Winneshiek, IA            | -0.129               | 5.89                      | 1.15                  |
| 19193              | Woodbury, IA              | -0.029               | 42.98                     | 69.68                 |
| 19195              | Worth, IA                 | -0.112               | 9.81                      | 6.97                  |
| 19197              | Wright, IA                | -0.086               | 17.26                     | 48.03                 |
| 20001              | Allen, KS                 | -0.051               | 31.71                     | 39.78                 |
| 20003              | Anderson, KS              | -0.059               | 28.02                     | 22.74                 |
| 20005              | Atchison, KS              | -0.013               | 50.24                     | 49.11                 |
| 20007              | Barber, KS                | -0.112               | 9.87                      | 28.03                 |
| 20009              | Barton, KS                | -0.072               | 22.35                     | 54.39                 |
| 20011              | Bourbon, KS               | -0.023               | 45.34                     | 58.28                 |
| 20013              | Brown, KS                 | -0.055               | 30.05                     | 27.17                 |
| 20015              | Butler, KS                | 0.003                | 57.4                      | 26.24                 |
| 20017              | Chase, KS                 | -0.046               | 34.54                     | 40.67                 |
| 20019              | Chautauqua, KS            | -0.023               | 45.37                     | 71.88                 |
| 20021              | Cherokee, KS              | -0.023               | 45.43                     | 38.28                 |
| 20023              | Cheyenne, KS              | -0.168               | 2.01                      | 10.03                 |
| 20025              | Clark, KS                 | -0.116               | 8.88                      | 31.24                 |
| 20027              | Clay, KS                  | -0.14                | 4.62                      | 4.94                  |
| 20029              | Cloud, KS                 | -0.114               | 9.46                      | 27.39                 |
| 20031              | Coffey, KS                | -0.072               | 22.41                     | 20.35                 |
| 20033              | Comanche, KS              | -0.146               | 3.88                      | 7.93                  |
| 20035              | Cowley, KS                | -0.027               | 43.68                     | 73.18                 |
| 20037              | Crawford, KS              | 0.025                | 66.6                      | 69.87                 |
| 20039              | Decatur, KS               | -0.193               | 0.86                      | 15.73                 |
| 20041              | Dickinson, KS             | -0.019               | 47.34                     | 33.22                 |
| 20043              | Doniphan, KS              | -0.051               | 31.68                     | 23.06                 |
| 20045              | Douglas, KS               | -0.025               | 44.67                     | 22.32                 |
| 20047              | Edwards, KS               | -0.109               | 10.47                     | 37.2                  |
| 20049              | Elk, KS                   | -0.065               | 25.34                     | 38.95                 |
| 20051              | Ellis, KS                 | -0.079               | 19.39                     | 15.64                 |
| 20053              | Ellsworth, KS             | -0.065               | 25.53                     | 39.52                 |
| 20055              | Finney, KS                | 0.145                | 93.03                     | 82.36                 |
| 20057              | Ford, KS                  | 0.144                | 92.9                      | 85.7                  |
| 20059              | Franklin, KS              | -0.014               | 49.6                      | 21.37                 |
| 20061              | Geary, KS                 | 0.127                | 90.93                     | 65.76                 |
| 20063              | Gove, KS                  | -0.164               | 2.32                      | 9.75                  |
| 20065              | Graham, KS                | -0.149               | 3.53                      | 12.55                 |
| 20067              | Grant, KS                 | 0.133                | 91.72                     | 38.15                 |
| 20069              | Gray, KS                  | 0.018                | 63.71                     | 27.36                 |
| 20071              | Greeley, KS               | -0.069               | 23.24                     | 57.52                 |
| 20073              | Greenwood, KS             | -0.106               | 11.02                     | 21.27                 |

| <b>County FIPS</b> | <b>County Description</b> | <b>DOS-SVI Index</b> | <b>DOS-SVI Percentile</b> | <b>SVI Percentile</b> |
|--------------------|---------------------------|----------------------|---------------------------|-----------------------|
| 20075              | Hamilton, KS              | -0.001               | 55.46                     | 25.86                 |
| 20077              | Harper, KS                | -0.102               | 11.88                     | 32.23                 |
| 20079              | Harvey, KS                | -0.079               | 19.52                     | 33.5                  |
| 20081              | Haskell, KS               | 0.124                | 90.54                     | 41.15                 |
| 20083              | Hodgeman, KS              | -0.075               | 21.14                     | 11.18                 |
| 20085              | Jackson, KS               | -0.024               | 45.08                     | 26.94                 |
| 20087              | Jefferson, KS             | -0.042               | 36.64                     | 5.48                  |
| 20089              | Jewell, KS                | -0.169               | 1.91                      | 8.76                  |
| 20091              | Johnson, KS               | -0.075               | 21.17                     | 6.15                  |
| 20093              | Kearny, KS                | 0.013                | 61.7                      | 46.56                 |
| 20095              | Kingman, KS               | -0.08                | 18.98                     | 5.13                  |
| 20097              | Kiowa, KS                 | -0.082               | 18.66                     | 25.8                  |
| 20099              | Labette, KS               | -0.033               | 41.36                     | 63.92                 |
| 20101              | Lane, KS                  | -0.085               | 17.54                     | 3.03                  |
| 20103              | Leavenworth, KS           | -0.036               | 39.45                     | 24.04                 |
| 20105              | Lincoln, KS               | -0.061               | 27.16                     | 13.22                 |
| 20107              | Linn, KS                  | -0.013               | 50.14                     | 44.78                 |
| 20109              | Logan, KS                 | -0.093               | 14.52                     | 12.96                 |
| 20111              | Lyon, KS                  | 0.019                | 64.25                     | 73.22                 |
| 20113              | McPherson, KS             | -0.118               | 8.15                      | 10.67                 |
| 20115              | Marion, KS                | -0.07                | 22.86                     | 17.71                 |
| 20117              | Marshall, KS              | -0.069               | 23.97                     | 12.64                 |
| 20119              | Meade, KS                 | -0.082               | 18.53                     | 37.17                 |
| 20121              | Miami, KS                 | -0.067               | 24.61                     | 2.58                  |
| 20123              | Mitchell, KS              | -0.078               | 19.68                     | 28.44                 |
| 20125              | Montgomery, KS            | -0.035               | 39.99                     | 80.29                 |
| 20127              | Morris, KS                | -0.137               | 4.84                      | 24.36                 |
| 20129              | Morton, KS                | -0.067               | 24.71                     | 40.8                  |
| 20131              | Nemaha, KS                | -0.089               | 16.05                     | 9.62                  |
| 20133              | Neosho, KS                | -0.058               | 28.65                     | 65.8                  |
| 20135              | Ness, KS                  | -0.14                | 4.58                      | 15                    |
| 20137              | Norton, KS                | -0.113               | 9.55                      | 29.75                 |
| 20139              | Osage, KS                 | -0.035               | 40.43                     | 23.41                 |
| 20141              | Osborne, KS               | -0.165               | 2.17                      | 7.23                  |
| 20143              | Ottawa, KS                | -0.086               | 17.35                     | 2.71                  |
| 20145              | Pawnee, KS                | -0.161               | 2.45                      | 28.66                 |
| 20147              | Phillips, KS              | -0.088               | 16.43                     | 24.2                  |
| 20149              | Pottawatomie, KS          | 0.035                | 70.23                     | 14.87                 |
| 20151              | Pratt, KS                 | 0.004                | 58.07                     | 38.73                 |
| 20153              | Rawlins, KS               | -0.173               | 1.82                      | 13.6                  |
| 20155              | Reno, KS                  | -0.034               | 40.94                     | 58.66                 |
| 20157              | Republic, KS              | -0.163               | 2.36                      | 6.05                  |
| 20159              | Rice, KS                  | -0.018               | 47.98                     | 42.52                 |
| 20161              | Riley, KS                 | 0.036                | 70.45                     | 43.73                 |
| 20163              | Rooks, KS                 | -0.111               | 9.96                      | 14.2                  |
| 20165              | Rush, KS                  | -0.122               | 7.48                      | 7.83                  |
| 20167              | Russell, KS               | -0.071               | 22.51                     | 23.92                 |
| 20169              | Saline, KS                | -0.063               | 26.33                     | 41.62                 |
| 20171              | Scott, KS                 | 0.023                | 66.06                     | 30.61                 |
| 20173              | Sedgwick, KS              | -0.004               | 54.25                     | 53.57                 |
| 20175              | Seward, KS                | 0.113                | 89.14                     | 91.11                 |
| 20177              | Shawnee, KS               | -0.041               | 37.44                     | 50.99                 |
| 20179              | Sheridan, KS              | -0.157               | 2.58                      | 6.85                  |
| 20181              | Sherman, KS               | -0.043               | 36.07                     | 49.84                 |
| 20183              | Smith, KS                 | -0.191               | 0.89                      | 5.03                  |

| <b>County FIPS</b> | <b>County Description</b> | <b>DOS-SVI Index</b> | <b>DOS-SVI Percentile</b> | <b>SVI Percentile</b> |
|--------------------|---------------------------|----------------------|---------------------------|-----------------------|
| 20185              | Stafford, KS              | -0.062               | 26.81                     | 27.77                 |
| 20187              | Stanton, KS               | -0.02                | 47.09                     | 49.65                 |
| 20189              | Stevens, KS               | 0.066                | 79.59                     | 67.39                 |
| 20191              | Sumner, KS                | -0.046               | 34.73                     | 22.23                 |
| 20193              | Thomas, KS                | -0.069               | 23.62                     | 7.04                  |
| 20195              | Trego, KS                 | -0.233               | 0.32                      | 3.89                  |
| 20197              | Wabaunsee, KS             | -0.054               | 30.53                     | 5.32                  |
| 20199              | Wallace, KS               | -0.102               | 12                        | 14.3                  |
| 20201              | Washington, KS            | -0.115               | 9.14                      | 14.81                 |
| 20203              | Wichita, KS               | -0.048               | 33.08                     | 46.78                 |
| 20205              | Wilson, KS                | -0.022               | 45.78                     | 63.66                 |
| 20207              | Woodson, KS               | 0.004                | 57.85                     | 43.98                 |
| 20209              | Wyandotte, KS             | 0.07                 | 80.52                     | 92.42                 |
| 21001              | Adair, KY                 | 0.068                | 80.29                     | 71.21                 |
| 21003              | Allen, KY                 | 0.032                | 69.12                     | 67.96                 |
| 21005              | Anderson, KY              | 0.038                | 71.41                     | 26.37                 |
| 21007              | Ballard, KY               | -0.028               | 43.49                     | 44.59                 |
| 21009              | Barren, KY                | 0.047                | 74.12                     | 77.61                 |
| 21011              | Bath, KY                  | 0.089                | 84.62                     | 72.9                  |
| 21013              | Bell, KY                  | 0.088                | 84.56                     | 89.27                 |
| 21015              | Boone, KY                 | -0.035               | 40.12                     | 12.77                 |
| 21017              | Bourbon, KY               | -0.031               | 42.31                     | 55.61                 |
| 21019              | Boyd, KY                  | 0.007                | 59.38                     | 69.08                 |
| 21021              | Boyle, KY                 | -0.057               | 29.07                     | 43.15                 |
| 21023              | Bracken, KY               | 0.064                | 79.05                     | 38.66                 |
| 21025              | Breathitt, KY             | 0.211                | 97.2                      | 82.2                  |
| 21027              | Breckinridge, KY          | 0.122                | 90.23                     | 73.76                 |
| 21029              | Bullitt, KY               | -0.025               | 44.54                     | 13.85                 |
| 21031              | Butler, KY                | 0.034                | 69.91                     | 79.2                  |
| 21033              | Caldwell, KY              | -0.013               | 50.02                     | 49.81                 |
| 21035              | Calloway, KY              | -0.021               | 46.26                     | 49.97                 |
| 21037              | Campbell, KY              | -0.06                | 27.89                     | 21.88                 |
| 21039              | Carlisle, KY              | 0.003                | 57.08                     | 33.95                 |
| 21041              | Carroll, KY               | 0.174                | 95.35                     | 89.04                 |
| 21043              | Carter, KY                | 0.093                | 85.45                     | 82.04                 |
| 21045              | Casey, KY                 | 0.093                | 85.51                     | 76.56                 |
| 21047              | Christian, KY             | 0.105                | 87.52                     | 91.27                 |
| 21049              | Clark, KY                 | -0.021               | 46.2                      | 60.61                 |
| 21051              | Clay, KY                  | 0.214                | 97.39                     | 90.99                 |
| 21053              | Clinton, KY               | 0.087                | 84.3                      | 77.8                  |
| 21055              | Crittenden, KY            | -0.043               | 35.98                     | 48.44                 |
| 21057              | Cumberland, KY            | -0.002               | 55.17                     | 53.15                 |
| 21059              | Daviess, KY               | -0.016               | 48.55                     | 61.69                 |
| 21061              | Edmonson, KY              | 0.081                | 82.97                     | 63.57                 |
| 21063              | Elliott, KY               | 0.023                | 65.9                      | 72.39                 |
| 21065              | Estill, KY                | 0.142                | 92.49                     | 79.97                 |
| 21067              | Fayette, KY               | -0.034               | 40.91                     | 48.76                 |
| 21069              | Fleming, KY               | 0.083                | 83.41                     | 77.1                  |
| 21071              | Floyd, KY                 | 0.166                | 94.84                     | 85.03                 |
| 21073              | Franklin, KY              | -0.039               | 38.05                     | 54.68                 |
| 21075              | Fulton, KY                | -0.071               | 22.83                     | 87.04                 |
| 21077              | Gallatin, KY              | 0.092                | 85.29                     | 61.24                 |
| 21079              | Garrard, KY               | 0.005                | 58.42                     | 42.99                 |
| 21081              | Grant, KY                 | 0.073                | 81.28                     | 56.02                 |
| 21083              | Graves, KY                | 0.059                | 77.56                     | 77.52                 |

| <b>County FIPS</b> | <b>County Description</b> | <b>DOS-SVI Index</b> | <b>DOS-SVI Percentile</b> | <b>SVI Percentile</b> |
|--------------------|---------------------------|----------------------|---------------------------|-----------------------|
| 21085              | Grayson, KY               | 0.028                | 67.75                     | 60.96                 |
| 21087              | Green, KY                 | -0.041               | 37.31                     | 52.26                 |
| 21089              | Greenup, KY               | 0.009                | 60.14                     | 32.17                 |
| 21091              | Hancock, KY               | 0.021                | 64.88                     | 38.22                 |
| 21093              | Hardin, KY                | 0.022                | 65.27                     | 56.72                 |
| 21095              | Harlan, KY                | 0.112                | 89.02                     | 88.03                 |
| 21097              | Harrison, KY              | 0.003                | 57.37                     | 50.57                 |
| 21099              | Hart, KY                  | 0.073                | 81.18                     | 76.59                 |
| 21101              | Henderson, KY             | -0.053               | 31.23                     | 70.89                 |
| 21103              | Henry, KY                 | 0.016                | 62.91                     | 52.74                 |
| 21105              | Hickman, KY               | -0.043               | 36.13                     | 57.39                 |
| 21107              | Hopkins, KY               | -0.014               | 49.48                     | 55.41                 |
| 21109              | Jackson, KY               | 0.11                 | 88.41                     | 66.62                 |
| 21111              | Jefferson, KY             | -0.035               | 40.37                     | 56.82                 |
| 21113              | Jessamine, KY             | -0.011               | 51.29                     | 52.01                 |
| 21115              | Johnson, KY               | 0.121                | 90.13                     | 81.02                 |
| 21117              | Kenton, KY                | -0.037               | 38.78                     | 33.79                 |
| 21119              | Knott, KY                 | 0.256                | 98.28                     | 85.48                 |
| 21121              | Knox, KY                  | 0.081                | 83                        | 83.25                 |
| 21123              | Larue, KY                 | -0.022               | 45.97                     | 53.18                 |
| 21125              | Laurel, KY                | 0.103                | 87.27                     | 75.22                 |
| 21127              | Lawrence, KY              | 0.178                | 95.7                      | 75.83                 |
| 21129              | Lee, KY                   | 0.067                | 79.81                     | 81.82                 |
| 21131              | Leslie, KY                | 0.207                | 97.1                      | 77.45                 |
| 21133              | Letcher, KY               | 0.175                | 95.48                     | 87.55                 |
| 21135              | Lewis, KY                 | 0.043                | 73.03                     | 62.42                 |
| 21137              | Lincoln, KY               | 0.08                 | 82.81                     | 70.83                 |
| 21139              | Livingston, KY            | 0.003                | 57.21                     | 26.4                  |
| 21141              | Logan, KY                 | -0.014               | 49.54                     | 52.87                 |
| 21143              | Lyon, KY                  | -0.077               | 20.31                     | 32.52                 |
| 21145              | McCracken, KY             | -0.074               | 21.23                     | 41.53                 |
| 21147              | McCreary, KY              | 0.3                  | 98.76                     | 87.8                  |
| 21149              | McLean, KY                | 0.039                | 71.7                      | 42.17                 |
| 21151              | Madison, KY               | 0.014                | 62.11                     | 49.68                 |
| 21153              | Magoffin, KY              | 0.265                | 98.38                     | 80.57                 |
| 21155              | Marion, KY                | 0.097                | 86.18                     | 90.57                 |
| 21157              | Marshall, KY              | -0.025               | 44.8                      | 27.23                 |
| 21159              | Martin, KY                | 0.268                | 98.41                     | 84.94                 |
| 21161              | Mason, KY                 | -0.021               | 46.51                     | 66.82                 |
| 21163              | Meade, KY                 | 0.106                | 87.87                     | 31.78                 |
| 21165              | Menifee, KY               | 0.031                | 68.89                     | 58.47                 |
| 21167              | Mercer, KY                | 0.038                | 71.09                     | 41.34                 |
| 21169              | Metcalfe, KY              | 0.018                | 63.58                     | 68.12                 |
| 21171              | Monroe, KY                | 0.03                 | 68.67                     | 69.75                 |
| 21173              | Montgomery, KY            | 0.058                | 77.3                      | 79.87                 |
| 21175              | Morgan, KY                | 0.075                | 81.79                     | 82.93                 |
| 21177              | Muhlenberg, KY            | 0.062                | 78.64                     | 61.34                 |
| 21179              | Nelson, KY                | 0.012                | 61.06                     | 28.95                 |
| 21181              | Nicholas, KY              | 0.1                  | 86.6                      | 81.97                 |
| 21183              | Ohio, KY                  | 0.085                | 83.67                     | 57.99                 |
| 21185              | Oldham, KY                | -0.034               | 40.88                     | 3.95                  |
| 21187              | Owen, KY                  | 0.085                | 83.99                     | 52.64                 |
| 21189              | Owsley, KY                | 0.09                 | 84.94                     | 84.14                 |
| 21191              | Pendleton, KY             | 0.004                | 58.01                     | 41.5                  |
| 21193              | Perry, KY                 | 0.213                | 97.33                     | 90.51                 |

| <b>County FIPS</b> | <b>County Description</b> | <b>DOS-SVI Index</b> | <b>DOS-SVI Percentile</b> | <b>SVI Percentile</b> |
|--------------------|---------------------------|----------------------|---------------------------|-----------------------|
| 21195              | Pike, KY                  | 0.104                | 87.46                     | 79.08                 |
| 21197              | Powell, KY                | 0.111                | 88.57                     | 77.32                 |
| 21199              | Pulaski, KY               | 0.04                 | 72.02                     | 74.2                  |
| 21201              | Robertson, KY             | -0.069               | 23.27                     | 35.38                 |
| 21203              | Rockcastle, KY            | 0.074                | 81.69                     | 78.82                 |
| 21205              | Rowan, KY                 | 0.042                | 72.68                     | 75.57                 |
| 21207              | Russell, KY               | 0.109                | 88.28                     | 86.34                 |
| 21209              | Scott, KY                 | 0.004                | 58.2                      | 33.31                 |
| 21211              | Shelby, KY                | 0.004                | 58.33                     | 42.61                 |
| 21213              | Simpson, KY               | -0.056               | 29.64                     | 28.79                 |
| 21215              | Spencer, KY               | -0.021               | 46.29                     | 3.69                  |
| 21217              | Taylor, KY                | -0.037               | 39.35                     | 72.1                  |
| 21219              | Todd, KY                  | 0.111                | 88.63                     | 80.92                 |
| 21221              | Trigg, KY                 | 0.047                | 74.24                     | 36.5                  |
| 21223              | Trimble, KY               | 0.13                 | 91.4                      | 71.43                 |
| 21225              | Union, KY                 | 0.051                | 75.61                     | 53.66                 |
| 21227              | Warren, KY                | 0.011                | 60.71                     | 70.96                 |
| 21229              | Washington, KY            | 0.01                 | 60.59                     | 51.27                 |
| 21231              | Wayne, KY                 | 0.068                | 80.13                     | 74.78                 |
| 21233              | Webster, KY               | 0.037                | 70.9                      | 78.54                 |
| 21235              | Whitley, KY               | 0.132                | 91.59                     | 83.79                 |
| 21237              | Wolfe, KY                 | 0.229                | 97.71                     | 86.21                 |
| 21239              | Woodford, KY              | -0.105               | 11.21                     | 20.41                 |
| 22001              | Acadia, LA                | 0.122                | 90.26                     | 91.82                 |
| 22003              | Allen, LA                 | 0.183                | 95.96                     | 92.61                 |
| 22005              | Ascension, LA             | 0.07                 | 80.55                     | 39.68                 |
| 22007              | Assumption, LA            | 0.06                 | 78.1                      | 77.9                  |
| 22009              | Avoyelles, LA             | 0.085                | 83.95                     | 96.34                 |
| 22011              | Beauregard, LA            | 0.108                | 88.09                     | 65.19                 |
| 22013              | Bienville, LA             | 0.048                | 74.59                     | 94.01                 |
| 22015              | Bossier, LA               | 0.033                | 69.41                     | 58.76                 |
| 22017              | Caddo, LA                 | 0.011                | 60.81                     | 83.85                 |
| 22019              | Calcasieu, LA             | 0.03                 | 68.8                      | 73.92                 |
| 22021              | Caldwell, LA              | 0.161                | 94.52                     | 93.31                 |
| 22023              | Cameron, LA               | 0.076                | 82.14                     | 26.43                 |
| 22025              | Catahoula, LA             | 0.054                | 76.44                     | 78.06                 |
| 22027              | Claiborne, LA             | 0.082                | 83.22                     | 94.78                 |
| 22029              | Concordia, LA             | 0.102                | 87.01                     | 91.34                 |
| 22031              | De Soto, LA               | 0.131                | 91.5                      | 89.17                 |
| 22033              | East Baton Rouge, LA      | 0.004                | 57.91                     | 66.53                 |
| 22035              | East Carroll, LA          | 0.172                | 95.1                      | 93.57                 |
| 22037              | East Feliciana, LA        | 0.097                | 86.22                     | 81.85                 |
| 22039              | Evangeline, LA            | 0.189                | 96.4                      | 99.75                 |
| 22041              | Franklin, LA              | 0.138                | 92.42                     | 95.19                 |
| 22043              | Grant, LA                 | 0.09                 | 85                        | 62.74                 |
| 22045              | Iberia, LA                | 0.148                | 93.41                     | 96.05                 |
| 22047              | Iberville, LA             | 0.064                | 78.92                     | 88.6                  |
| 22049              | Jackson, LA               | -0.003               | 54.79                     | 93.82                 |
| 22051              | Jefferson, LA             | -0.051               | 31.96                     | 61.21                 |
| 22053              | Jefferson Davis, LA       | 0.102                | 87.14                     | 81.05                 |
| 22055              | Lafayette, LA             | 0.003                | 57.56                     | 62.17                 |
| 22057              | Lafourche, LA             | 0.04                 | 71.82                     | 76.69                 |
| 22059              | LaSalle, LA               | 0.01                 | 60.68                     | 76.34                 |
| 22061              | Lincoln, LA               | 0.056                | 76.79                     | 84.78                 |
| 22063              | Livingston, LA            | 0.059                | 77.62                     | 43.09                 |

| <b>County FIPS</b> | <b>County Description</b> | <b>DOS-SVI Index</b> | <b>DOS-SVI Percentile</b> | <b>SVI Percentile</b> |
|--------------------|---------------------------|----------------------|---------------------------|-----------------------|
| 22065              | Madison, LA               | 0.16                 | 94.36                     | 96.97                 |
| 22067              | Morehouse, LA             | 0.043                | 73                        | 88.47                 |
| 22069              | Natchitoches, LA          | 0.187                | 96.18                     | 85.73                 |
| 22071              | Orleans, LA               | 0.016                | 63.01                     | 74.49                 |
| 22073              | Ouachita, LA              | 0.056                | 76.86                     | 85.22                 |
| 22075              | Plaquemines, LA           | 0.025                | 66.76                     | 70.61                 |
| 22077              | Pointe Coupee, LA         | 0.104                | 87.3                      | 84.75                 |
| 22079              | Rapides, LA               | 0.037                | 70.65                     | 90.86                 |
| 22081              | Red River, LA             | 0.054                | 76.03                     | 81.37                 |
| 22083              | Richland, LA              | 0.022                | 65.58                     | 85.54                 |
| 22085              | Sabine, LA                | 0.155                | 94.05                     | 83.15                 |
| 22087              | St. Bernard, LA           | 0.117                | 89.62                     | 77.13                 |
| 22089              | St. Charles, LA           | 0.02                 | 64.56                     | 35.29                 |
| 22091              | St. Helena, LA            | 0.198                | 96.82                     | 90                    |
| 22093              | St. James, LA             | 0.071                | 80.58                     | 62.99                 |
| 22095              | St. John the Baptist, LA  | 0.055                | 76.66                     | 74.68                 |
| 22097              | St. Landry, LA            | 0.085                | 83.73                     | 92.2                  |
| 22099              | St. Martin, LA            | 0.098                | 86.37                     | 78.31                 |
| 22101              | St. Mary, LA              | 0.101                | 86.66                     | 91.62                 |
| 22103              | St. Tammany, LA           | -0.02                | 47.05                     | 31.05                 |
| 22105              | Tangipahoa, LA            | 0.103                | 87.17                     | 88.85                 |
| 22107              | Tensas, LA                | 0.225                | 97.58                     | 83.66                 |
| 22109              | Terrebonne, LA            | 0.069                | 80.39                     | 89.52                 |
| 22111              | Union, LA                 | 0.082                | 83.32                     | 80.8                  |
| 22113              | Vermilion, LA             | 0.132                | 91.63                     | 82.01                 |
| 22115              | Vernon, LA                | 0.134                | 91.82                     | 74.33                 |
| 22117              | Washington, LA            | 0.147                | 93.38                     | 99.62                 |
| 22119              | Webster, LA               | 0.02                 | 64.85                     | 87.9                  |
| 22121              | West Baton Rouge, LA      | 0.05                 | 75.33                     | 76.11                 |
| 22123              | West Carroll, LA          | 0.097                | 86.25                     | 66.85                 |
| 22125              | West Feliciana, LA        | 0.059                | 77.84                     | 69.01                 |
| 22127              | Winn, LA                  | 0.005                | 58.52                     | 77.55                 |
| 23001              | Androscoggin, ME          | -0.048               | 33.65                     | 55.67                 |
| 23003              | Aroostook, ME             | -0.084               | 17.92                     | 59.46                 |
| 23005              | Cumberland, ME            | -0.105               | 11.27                     | 13.63                 |
| 23007              | Franklin, ME              | -0.069               | 23.88                     | 21.5                  |
| 23009              | Hancock, ME               | -0.1                 | 12.48                     | 19.3                  |
| 23011              | Kennebec, ME              | -0.057               | 29.39                     | 37.87                 |
| 23013              | Knox, ME                  | -0.123               | 7.23                      | 14.75                 |
| 23015              | Lincoln, ME               | -0.164               | 2.2                       | 11.43                 |
| 23017              | Oxford, ME                | -0.052               | 31.42                     | 37.26                 |
| 23019              | Penobscot, ME             | -0.04                | 37.73                     | 45.32                 |
| 23021              | Piscataquis, ME           | -0.075               | 21.01                     | 48.98                 |
| 23023              | Sagadahoc, ME             | -0.147               | 3.73                      | 5.22                  |
| 23025              | Somerset, ME              | 0.023                | 66.12                     | 62.2                  |
| 23027              | Waldo, ME                 | -0.053               | 30.95                     | 21.97                 |
| 23029              | Washington, ME            | -0.061               | 27.25                     | 64.39                 |
| 23031              | York, ME                  | -0.096               | 13.31                     | 9.36                  |
| 24001              | Allegany, MD              | -0.012               | 50.75                     | 62.1                  |
| 24003              | Anne Arundel, MD          | -0.055               | 30.34                     | 17.83                 |
| 24005              | Baltimore, MD             | -0.081               | 18.88                     | 38.18                 |
| 24009              | Calvert, MD               | -0.034               | 40.69                     | 4.71                  |
| 24011              | Caroline, MD              | -0.03                | 42.63                     | 55.35                 |
| 24013              | Carroll, MD               | -0.085               | 17.64                     | 4.04                  |
| 24015              | Cecil, MD                 | -0.008               | 52.63                     | 29.33                 |

| <b>County FIPS</b> | <b>County Description</b> | <b>DOS-SVI Index</b> | <b>DOS-SVI Percentile</b> | <b>SVI Percentile</b> |
|--------------------|---------------------------|----------------------|---------------------------|-----------------------|
| 24017              | Charles, MD               | -0.056               | 29.83                     | 17.23                 |
| 24019              | Dorchester, MD            | -0.055               | 30.12                     | 75.06                 |
| 24021              | Frederick, MD             | -0.058               | 28.68                     | 15.89                 |
| 24023              | Garrett, MD               | -0.104               | 11.46                     | 18.12                 |
| 24025              | Harford, MD               | -0.059               | 28.27                     | 9.33                  |
| 24027              | Howard, MD                | -0.056               | 29.42                     | 13.06                 |
| 24029              | Kent, MD                  | -0.178               | 1.47                      | 42.77                 |
| 24031              | Montgomery, MD            | -0.051               | 31.8                      | 32.55                 |
| 24033              | Prince George's, MD       | 0.006                | 58.84                     | 62.61                 |
| 24035              | Queen Anne's, MD          | -0.104               | 11.56                     | 2.2                   |
| 24037              | St. Mary's, MD            | -0.044               | 35.82                     | 20.86                 |
| 24039              | Somerset, MD              | 0.026                | 67.21                     | 89.78                 |
| 24041              | Talbot, MD                | -0.218               | 0.38                      | 13.31                 |
| 24043              | Washington, MD            | -0.022               | 45.69                     | 61.4                  |
| 24045              | Wicomico, MD              | 0.027                | 67.46                     | 77.39                 |
| 24047              | Worcester, MD             | -0.164               | 2.23                      | 28.03                 |
| 24510              | Baltimore City, MD        | 0.035                | 70.2                      | 83.12                 |
| 25001              | Barnstable, MA            | -0.191               | 0.92                      | 5.64                  |
| 25003              | Berkshire, MA             | -0.122               | 7.45                      | 40.83                 |
| 25005              | Bristol, MA               | -0.075               | 21.11                     | 52.48                 |
| 25007              | Dukes, MA                 | -0.155               | 2.83                      | 0.96                  |
| 25009              | Essex, MA                 | -0.069               | 23.53                     | 50.8                  |
| 25011              | Franklin, MA              | -0.109               | 10.41                     | 20.96                 |
| 25013              | Hampden, MA               | -0.041               | 36.93                     | 82.32                 |
| 25015              | Hampshire, MA             | -0.068               | 24.1                      | 23.25                 |
| 25017              | Middlesex, MA             | -0.078               | 19.99                     | 22.64                 |
| 25019              | Nantucket, MA             | -0.111               | 10.06                     | 2.68                  |
| 25021              | Norfolk, MA               | -0.072               | 22.06                     | 20.92                 |
| 25023              | Plymouth, MA              | -0.073               | 21.81                     | 23.03                 |
| 25025              | Suffolk, MA               | -0.013               | 49.98                     | 73.79                 |
| 25027              | Worcester, MA             | -0.042               | 36.71                     | 40.96                 |
| 26001              | Alcona, MI                | -0.127               | 6.34                      | 25.57                 |
| 26003              | Alger, MI                 | -0.067               | 24.77                     | 44.81                 |
| 26005              | Allegan, MI               | -0.02                | 46.74                     | 17.58                 |
| 26007              | Alpena, MI                | -0.092               | 14.74                     | 34.08                 |
| 26009              | Antrim, MI                | -0.111               | 10.12                     | 11.56                 |
| 26011              | Arenac, MI                | -0.001               | 55.52                     | 50.54                 |
| 26013              | Baraga, MI                | -0.011               | 51                        | 65.99                 |
| 26015              | Barry, MI                 | -0.03                | 42.38                     | 8.69                  |
| 26017              | Bay, MI                   | -0.06                | 27.57                     | 44.04                 |
| 26019              | Benzie, MI                | -0.102               | 11.94                     | 10.51                 |
| 26021              | Berrien, MI               | -0.031               | 41.99                     | 64.75                 |
| 26023              | Branch, MI                | -0.026               | 44.28                     | 63.15                 |
| 26025              | Calhoun, MI               | -0.023               | 45.3                      | 72.42                 |
| 26027              | Cass, MI                  | -0.021               | 46.35                     | 32.8                  |
| 26029              | Charlevoix, MI            | -0.121               | 7.67                      | 9.68                  |
| 26031              | Cheboygan, MI             | -0.067               | 24.39                     | 28.6                  |
| 26033              | Chippewa, MI              | 0.021                | 65.14                     | 72.45                 |
| 26035              | Clare, MI                 | 0.054                | 76.5                      | 77.2                  |
| 26037              | Clinton, MI               | -0.061               | 27.32                     | 4.01                  |
| 26039              | Crawford, MI              | -0.044               | 35.69                     | 36.97                 |
| 26041              | Delta, MI                 | -0.093               | 14.61                     | 35.45                 |
| 26043              | Dickinson, MI             | -0.096               | 13.37                     | 22.96                 |
| 26045              | Eaton, MI                 | -0.059               | 28.21                     | 31.31                 |
| 26047              | Emmet, MI                 | -0.095               | 13.66                     | 13.57                 |

| <b>County FIPS</b> | <b>County Description</b> | <b>DOS-SVI Index</b> | <b>DOS-SVI Percentile</b> | <b>SVI Percentile</b> |
|--------------------|---------------------------|----------------------|---------------------------|-----------------------|
| 26049              | Genesee, MI               | 0.025                | 66.86                     | 66.24                 |
| 26051              | Gladwin, MI               | -0.04                | 37.54                     | 53.98                 |
| 26053              | Gogebic, MI               | -0.121               | 7.7                       | 40.38                 |
| 26055              | Grand Traverse, MI        | -0.061               | 27.03                     | 18.03                 |
| 26057              | Gratiot, MI               | -0.015               | 49.25                     | 60.35                 |
| 26059              | Hillsdale, MI             | -0.022               | 45.81                     | 50.19                 |
| 26061              | Houghton, MI              | 0.031                | 68.93                     | 49.62                 |
| 26063              | Huron, MI                 | -0.092               | 14.99                     | 27.45                 |
| 26065              | Ingham, MI                | 0.006                | 58.77                     | 57.42                 |
| 26067              | Ionia, MI                 | 0.023                | 65.93                     | 47.8                  |
| 26069              | Iosco, MI                 | -0.089               | 16.2                      | 44.94                 |
| 26071              | Iron, MI                  | -0.15                | 3.41                      | 28.25                 |
| 26073              | Isabella, MI              | 0.036                | 70.55                     | 60.16                 |
| 26075              | Jackson, MI               | -0.02                | 46.93                     | 55.06                 |
| 26077              | Kalamazoo, MI             | -0.027               | 43.97                     | 40.7                  |
| 26079              | Kalkaska, MI              | 0.029                | 68.04                     | 50.83                 |
| 26081              | Kent, MI                  | -0.016               | 48.68                     | 47.61                 |
| 26083              | Keweenaw, MI              | -0.175               | 1.66                      | 7.87                  |
| 26085              | Lake, MI                  | 0.076                | 82.04                     | 78.18                 |
| 26087              | Lapeer, MI                | -0.01                | 51.51                     | 23.82                 |
| 26089              | Leelanau, MI              | -0.159               | 2.52                      | 2.45                  |
| 26091              | Lenawee, MI               | -0.059               | 28.18                     | 40.76                 |
| 26093              | Livingston, MI            | -0.059               | 28.24                     | 0.67                  |
| 26095              | Luce, MI                  | -0.043               | 35.91                     | 53.38                 |
| 26097              | Mackinac, MI              | -0.042               | 36.77                     | 64.52                 |
| 26099              | Macomb, MI                | -0.042               | 36.68                     | 32.96                 |
| 26101              | Manistee, MI              | -0.057               | 29.1                      | 39.97                 |
| 26103              | Marquette, MI             | -0.047               | 34.16                     | 30.57                 |
| 26105              | Mason, MI                 | -0.069               | 23.4                      | 33.76                 |
| 26107              | Mecosta, MI               | 0.022                | 65.46                     | 59.75                 |
| 26109              | Menominee, MI             | -0.11                | 10.28                     | 27.64                 |
| 26111              | Midland, MI               | -0.035               | 39.95                     | 16.18                 |
| 26113              | Missaukee, MI             | 0.038                | 71.28                     | 47.55                 |
| 26115              | Monroe, MI                | -0.05                | 32.19                     | 14.94                 |
| 26117              | Montcalm, MI              | -0.006               | 53.17                     | 61.27                 |
| 26119              | Montmorency, MI           | -0.026               | 44.16                     | 37.29                 |
| 26121              | Muskegon, MI              | 0.013                | 61.48                     | 70.35                 |
| 26123              | Newaygo, MI               | 0.038                | 71.35                     | 63.18                 |
| 26125              | Oakland, MI               | -0.069               | 23.85                     | 11.4                  |
| 26127              | Oceana, MI                | 0.071                | 80.67                     | 85.8                  |
| 26129              | Ogemaw, MI                | -0.021               | 46.39                     | 62.58                 |
| 26131              | Ontonagon, MI             | -0.145               | 4.01                      | 27.32                 |
| 26133              | Osceola, MI               | 0.025                | 66.51                     | 74.01                 |
| 26135              | Oscoda, MI                | 0.053                | 75.84                     | 66.94                 |
| 26137              | Otsego, MI                | -0.039               | 37.76                     | 36.94                 |
| 26139              | Ottawa, MI                | -0.02                | 46.83                     | 21.72                 |
| 26141              | Presque Isle, MI          | -0.082               | 18.62                     | 27.61                 |
| 26143              | Roscommon, MI             | -0.058               | 28.4                      | 46.27                 |
| 26145              | Saginaw, MI               | -0.029               | 43.39                     | 70.48                 |
| 26147              | St. Clair, MI             | -0.034               | 40.5                      | 27.9                  |
| 26149              | St. Joseph, MI            | -0.008               | 52.47                     | 65.16                 |
| 26151              | Sanilac, MI               | -0.016               | 49                        | 48.34                 |
| 26153              | Schoolcraft, MI           | -0.033               | 41.39                     | 54.52                 |
| 26155              | Shiawassee, MI            | -0.065               | 25.5                      | 13.25                 |
| 26157              | Tuscola, MI               | -0.005               | 54.19                     | 39.59                 |



| <b>County FIPS</b> | <b>County Description</b> | <b>DOS-SVI Index</b> | <b>DOS-SVI Percentile</b> | <b>SVI Percentile</b> |
|--------------------|---------------------------|----------------------|---------------------------|-----------------------|
| 26159              | Van Buren, MI             | 0.027                | 67.33                     | 65.89                 |
| 26161              | Washtenaw, MI             | -0.041               | 36.84                     | 22.36                 |
| 26163              | Wayne, MI                 | 0.058                | 77.4                      | 87.23                 |
| 26165              | Wexford, MI               | -0.003               | 54.89                     | 50.35                 |
| 27001              | Aitkin, MN                | -0.134               | 5.32                      | 30.83                 |
| 27003              | Anoka, MN                 | -0.048               | 33.11                     | 14.04                 |
| 27005              | Becker, MN                | -0.062               | 26.49                     | 29.9                  |
| 27007              | Beltrami, MN              | 0.05                 | 75.26                     | 77.71                 |
| 27009              | Benton, MN                | -0.023               | 45.4                      | 43.18                 |
| 27011              | Big Stone, MN             | -0.166               | 2.1                       | 20.06                 |
| 27013              | Blue Earth, MN            | -0.057               | 28.78                     | 28.38                 |
| 27015              | Brown, MN                 | -0.149               | 3.5                       | 12.74                 |
| 27017              | Carlton, MN               | -0.037               | 39.22                     | 26.66                 |
| 27019              | Carver, MN                | -0.048               | 33.24                     | 1.24                  |
| 27021              | Cass, MN                  | -0.069               | 23.78                     | 35                    |
| 27023              | Chippewa, MN              | -0.119               | 7.93                      | 35.22                 |
| 27025              | Chisago, MN               | -0.051               | 32.03                     | 5.92                  |
| 27027              | Clay, MN                  | -0.058               | 28.37                     | 22.17                 |
| 27029              | Clearwater, MN            | 0.056                | 76.73                     | 79.17                 |
| 27031              | Cook, MN                  | -0.079               | 19.36                     | 20.29                 |
| 27033              | Cottonwood, MN            | -0.067               | 24.64                     | 47.26                 |
| 27035              | Crow Wing, MN             | -0.134               | 5.35                      | 12.23                 |
| 27037              | Dakota, MN                | -0.07                | 23.14                     | 12.07                 |
| 27039              | Dodge, MN                 | -0.074               | 21.27                     | 5.73                  |
| 27041              | Douglas, MN               | -0.139               | 4.74                      | 4.46                  |
| 27043              | Faribault, MN             | -0.141               | 4.46                      | 15.7                  |
| 27045              | Fillmore, MN              | -0.083               | 18.24                     | 21.69                 |
| 27047              | Freeborn, MN              | -0.124               | 7.16                      | 43.28                 |
| 27049              | Goodhue, MN               | -0.086               | 17.41                     | 17.07                 |
| 27051              | Grant, MN                 | -0.121               | 7.64                      | 9.46                  |
| 27053              | Hennepin, MN              | -0.053               | 31.26                     | 30.92                 |
| 27055              | Houston, MN               | -0.135               | 5.06                      | 1.85                  |
| 27057              | Hubbard, MN               | -0.088               | 16.52                     | 20.51                 |
| 27059              | Isanti, MN                | -0.049               | 33.05                     | 10.22                 |
| 27061              | Itasca, MN                | -0.046               | 34.67                     | 32.93                 |
| 27063              | Jackson, MN               | -0.122               | 7.39                      | 3.06                  |
| 27065              | Kanabec, MN               | -0.038               | 38.75                     | 28.41                 |
| 27067              | Kandiyohi, MN             | -0.076               | 20.6                      | 40.64                 |
| 27069              | Kittson, MN               | -0.125               | 6.88                      | 9.97                  |
| 27071              | Koochiching, MN           | -0.085               | 17.48                     | 43.66                 |
| 27073              | Lac qui Parle, MN         | -0.184               | 1.15                      | 10.06                 |
| 27075              | Lake, MN                  | -0.143               | 4.33                      | 11.02                 |
| 27077              | Lake of the Woods, MN     | -0.063               | 26.23                     | 15.76                 |
| 27079              | Le Sueur, MN              | -0.064               | 25.88                     | 11.46                 |
| 27081              | Lincoln, MN               | -0.146               | 3.92                      | 6.66                  |
| 27083              | Lyon, MN                  | -0.042               | 36.48                     | 45.32                 |
| 27085              | McLeod, MN                | -0.118               | 8.5                       | 12.61                 |
| 27087              | Mahnomen, MN              | 0.085                | 83.7                      | 87.17                 |
| 27089              | Marshall, MN              | -0.095               | 13.63                     | 14.11                 |
| 27091              | Martin, MN                | -0.143               | 4.27                      | 19.33                 |
| 27093              | Meeker, MN                | -0.074               | 21.49                     | 18.69                 |
| 27095              | Mille Lacs, MN            | -0.015               | 49.38                     | 59.17                 |
| 27097              | Morrison, MN              | -0.056               | 29.55                     | 26.82                 |
| 27099              | Mower, MN                 | -0.045               | 34.86                     | 62.83                 |
| 27101              | Murray, MN                | -0.161               | 2.39                      | 10.64                 |

| <b>County FIPS</b> | <b>County Description</b> | <b>DOS-SVI Index</b> | <b>DOS-SVI Percentile</b> | <b>SVI Percentile</b> |
|--------------------|---------------------------|----------------------|---------------------------|-----------------------|
| 27103              | Nicollet, MN              | -0.086               | 17.22                     | 25.13                 |
| 27105              | Nobles, MN                | -0.019               | 47.56                     | 81.5                  |
| 27107              | Norman, MN                | -0.067               | 24.58                     | 32.48                 |
| 27109              | Olmsted, MN               | -0.048               | 33.14                     | 25.99                 |
| 27111              | Otter Tail, MN            | -0.102               | 12.03                     | 20.99                 |
| 27113              | Pennington, MN            | -0.088               | 16.49                     | 30.16                 |
| 27115              | Pine, MN                  | -0.023               | 45.59                     | 46.31                 |
| 27117              | Pipestone, MN             | -0.09                | 15.79                     | 46.46                 |
| 27119              | Polk, MN                  | -0.069               | 23.72                     | 36.69                 |
| 27121              | Pope, MN                  | -0.137               | 4.9                       | 3.15                  |
| 27123              | Ramsey, MN                | -0.014               | 49.63                     | 63.34                 |
| 27125              | Red Lake, MN              | -0.051               | 32                        | 15.25                 |
| 27127              | Redwood, MN               | -0.125               | 6.69                      | 22.93                 |
| 27129              | Renville, MN              | -0.111               | 9.93                      | 19.68                 |
| 27131              | Rice, MN                  | -0.043               | 36.17                     | 39.3                  |
| 27133              | Rock, MN                  | -0.098               | 12.83                     | 15.32                 |
| 27135              | Roseau, MN                | -0.037               | 38.94                     | 24.78                 |
| 27137              | St. Louis, MN             | -0.069               | 23.46                     | 31.18                 |
| 27139              | Scott, MN                 | 0.013                | 61.64                     | 11.08                 |
| 27141              | Sherburne, MN             | -0.026               | 44.32                     | 8.85                  |
| 27143              | Sibley, MN                | -0.087               | 16.78                     | 13.15                 |
| 27145              | Stearns, MN               | -0.021               | 46.1                      | 38.85                 |
| 27147              | Steele, MN                | -0.037               | 39.26                     | 30.13                 |
| 27149              | Stevens, MN               | -0.087               | 16.81                     | 22.58                 |
| 27151              | Swift, MN                 | -0.136               | 4.97                      | 32.13                 |
| 27153              | Todd, MN                  | -0.033               | 41.26                     | 48.12                 |
| 27155              | Traverse, MN              | -0.156               | 2.71                      | 26.02                 |
| 27157              | Wabasha, MN               | -0.113               | 9.65                      | 5.89                  |
| 27159              | Wadena, MN                | -0.037               | 39.06                     | 65.54                 |
| 27161              | Waseca, MN                | -0.071               | 22.48                     | 25.03                 |
| 27163              | Washington, MN            | -0.074               | 21.43                     | 6.82                  |
| 27165              | Watonwan, MN              | -0.104               | 11.59                     | 51.91                 |
| 27167              | Wilkin, MN                | -0.132               | 5.67                      | 19.24                 |
| 27169              | Winona, MN                | -0.07                | 22.99                     | 21.15                 |
| 27171              | Wright, MN                | -0.009               | 52.05                     | 4.62                  |
| 27173              | Yellow Medicine, MN       | -0.118               | 8.4                       | 33.44                 |
| 28001              | Adams, MS                 | 0.061                | 78.38                     | 99.14                 |
| 28003              | Alcorn, MS                | 0.069                | 80.33                     | 69.55                 |
| 28005              | Amite, MS                 | 0.06                 | 77.91                     | 81.91                 |
| 28007              | Attala, MS                | 0.143                | 92.77                     | 98.44                 |
| 28009              | Benton, MS                | 0.1                  | 86.63                     | 66.05                 |
| 28011              | Bolivar, MS               | 0.09                 | 84.81                     | 96.75                 |
| 28013              | Calhoun, MS               | 0.068                | 80.04                     | 96.5                  |
| 28015              | Carroll, MS               | 0.123                | 90.35                     | 63.03                 |
| 28017              | Chickasaw, MS             | 0.041                | 72.46                     | 91.43                 |
| 28019              | Choctaw, MS               | 0.103                | 87.23                     | 85.41                 |
| 28021              | Claiborne, MS             | 0.326                | 98.95                     | 99.2                  |
| 28023              | Clarke, MS                | 0.041                | 72.33                     | 66.69                 |
| 28025              | Clay, MS                  | 0.073                | 81.34                     | 70.54                 |
| 28027              | Coahoma, MS               | 0.245                | 98.06                     | 93.22                 |
| 28029              | Copiah, MS                | 0.174                | 95.42                     | 94.11                 |
| 28031              | Covington, MS             | 0.145                | 93                        | 78.79                 |
| 28033              | DeSoto, MS                | 0.029                | 68.23                     | 30.32                 |
| 28035              | Forrest, MS               | 0.096                | 85.77                     | 93.66                 |
| 28037              | Franklin, MS              | 0.048                | 74.66                     | 57.17                 |

| <b>County FIPS</b> | <b>County Description</b> | <b>DOS-SVI Index</b> | <b>DOS-SVI Percentile</b> | <b>SVI Percentile</b> |
|--------------------|---------------------------|----------------------|---------------------------|-----------------------|
| 28039              | George, MS                | 0.157                | 94.21                     | 61.37                 |
| 28041              | Greene, MS                | 0.176                | 95.58                     | 60.67                 |
| 28043              | Grenada, MS               | 0.027                | 67.69                     | 87.71                 |
| 28045              | Hancock, MS               | -0.008               | 52.75                     | 59.24                 |
| 28047              | Harrison, MS              | 0.076                | 82.11                     | 88.38                 |
| 28049              | Hinds, MS                 | 0.08                 | 82.87                     | 87.42                 |
| 28051              | Holmes, MS                | 0.334                | 99.01                     | 98.18                 |
| 28053              | Humphreys, MS             | 0.277                | 98.57                     | 93.69                 |
| 28055              | Issaquena, MS             | 0.247                | 98.12                     | 95.1                  |
| 28057              | Itawamba, MS              | -0.015               | 49.41                     | 54.87                 |
| 28059              | Jackson, MS               | 0.026                | 67.18                     | 54.33                 |
| 28061              | Jasper, MS                | 0.037                | 71.03                     | 76.91                 |
| 28063              | Jefferson, MS             | 0.165                | 94.75                     | 96.37                 |
| 28065              | Jefferson Davis, MS       | 0.086                | 84.14                     | 84.39                 |
| 28067              | Jones, MS                 | 0.058                | 77.43                     | 89.2                  |
| 28069              | Kemper, MS                | 0.038                | 71.25                     | 92.74                 |
| 28071              | Lafayette, MS             | 0.038                | 71.22                     | 50.96                 |
| 28073              | Lamar, MS                 | 0.101                | 86.85                     | 53.06                 |
| 28075              | Lauderdale, MS            | 0.043                | 72.94                     | 92.83                 |
| 28077              | Lawrence, MS              | 0.131                | 91.44                     | 66.34                 |
| 28079              | Leake, MS                 | 0.178                | 95.64                     | 99.46                 |
| 28081              | Lee, MS                   | 0.075                | 81.95                     | 79.52                 |
| 28083              | Leflore, MS               | 0.153                | 93.92                     | 96.53                 |
| 28085              | Lincoln, MS               | 0.088                | 84.46                     | 75.86                 |
| 28087              | Lowndes, MS               | 0.054                | 76.22                     | 79.75                 |
| 28089              | Madison, MS               | -0.016               | 48.58                     | 28.98                 |
| 28091              | Marion, MS                | 0.122                | 90.29                     | 93.5                  |
| 28093              | Marshall, MS              | 0.043                | 73.1                      | 69.04                 |
| 28095              | Monroe, MS                | 0.035                | 70.04                     | 63.98                 |
| 28097              | Montgomery, MS            | 0.046                | 73.86                     | 89.14                 |
| 28099              | Neshoba, MS               | 0.198                | 96.85                     | 96.85                 |
| 28101              | Newton, MS                | 0.108                | 88.16                     | 92.13                 |
| 28103              | Noxubee, MS               | 0.212                | 97.23                     | 98.6                  |
| 28105              | Oktibbeha, MS             | 0.107                | 87.97                     | 64.2                  |
| 28107              | Panola, MS                | 0.127                | 90.73                     | 89.33                 |
| 28109              | Pearl River, MS           | 0.074                | 81.76                     | 70.51                 |
| 28111              | Perry, MS                 | 0.089                | 84.66                     | 70.86                 |
| 28113              | Pike, MS                  | 0.093                | 85.32                     | 98.82                 |
| 28115              | Pontotoc, MS              | 0.145                | 92.96                     | 89.62                 |
| 28117              | Prentiss, MS              | 0.071                | 80.71                     | 85.13                 |
| 28119              | Quitman, MS               | 0.425                | 99.43                     | 95.45                 |
| 28121              | Rankin, MS                | 0.006                | 58.96                     | 31.27                 |
| 28123              | Scott, MS                 | 0.127                | 90.77                     | 98.5                  |
| 28125              | Sharkey, MS               | 0.307                | 98.85                     | 97.29                 |
| 28127              | Simpson, MS               | 0.149                | 93.54                     | 90.73                 |
| 28129              | Smith, MS                 | -0.006               | 53.36                     | 47.32                 |
| 28131              | Stone, MS                 | 0.095                | 85.67                     | 60.45                 |
| 28133              | Sunflower, MS             | 0.246                | 98.09                     | 94.94                 |
| 28135              | Tallahatchie, MS          | 0.22                 | 97.42                     | 97.36                 |
| 28137              | Tate, MS                  | 0.133                | 91.69                     | 86.5                  |
| 28139              | Tippah, MS                | 0.113                | 89.24                     | 86.46                 |
| 28141              | Tishomingo, MS            | 0.085                | 83.92                     | 66.59                 |
| 28143              | Tunica, MS                | 0.161                | 94.43                     | 97.2                  |
| 28145              | Union, MS                 | 0.076                | 82.08                     | 82.77                 |
| 28147              | Walthall, MS              | 0.087                | 84.27                     | 86.11                 |

| <b>County FIPS</b> | <b>County Description</b> | <b>DOS-SVI Index</b> | <b>DOS-SVI Percentile</b> | <b>SVI Percentile</b> |
|--------------------|---------------------------|----------------------|---------------------------|-----------------------|
| 28149              | Warren, MS                | 0.054                | 76.31                     | 86.05                 |
| 28151              | Washington, MS            | 0.2                  | 96.88                     | 97.83                 |
| 28153              | Wayne, MS                 | 0.137                | 92.2                      | 89.97                 |
| 28155              | Webster, MS               | -0.015               | 49.19                     | 59.62                 |
| 28157              | Wilkinson, MS             | 0.184                | 95.99                     | 91.69                 |
| 28159              | Winston, MS               | 0.071                | 80.8                      | 93.06                 |
| 28161              | Yalobusha, MS             | 0.032                | 69.15                     | 73.47                 |
| 28163              | Yazoo, MS                 | 0.253                | 98.22                     | 99.52                 |
| 29001              | Adair, MO                 | 0.007                | 59.28                     | 45.48                 |
| 29003              | Andrew, MO                | -0.064               | 25.57                     | 3.25                  |
| 29005              | Atchison, MO              | -0.148               | 3.6                       | 7.36                  |
| 29007              | Audrain, MO               | 0.018                | 63.74                     | 61.5                  |
| 29009              | Barry, MO                 | 0.03                 | 68.61                     | 70.99                 |
| 29011              | Barton, MO                | -0.006               | 53.49                     | 59.94                 |
| 29013              | Bates, MO                 | -0.015               | 49.12                     | 38.57                 |
| 29015              | Benton, MO                | -0.013               | 50.11                     | 55.13                 |
| 29017              | Bollinger, MO             | -0.001               | 55.68                     | 47.93                 |
| 29019              | Boone, MO                 | -0.016               | 48.81                     | 29.27                 |
| 29021              | Buchanan, MO              | -0.027               | 43.84                     | 71.82                 |
| 29023              | Butler, MO                | 0.051                | 75.58                     | 81.72                 |
| 29025              | Caldwell, MO              | -0.009               | 51.99                     | 45.13                 |
| 29027              | Callaway, MO              | -0.044               | 35.59                     | 32.32                 |
| 29029              | Camden, MO                | -0.098               | 12.8                      | 33.63                 |
| 29031              | Cape Girardeau, MO        | -0.019               | 47.66                     | 41.18                 |
| 29033              | Carroll, MO               | 0.009                | 60.17                     | 53.25                 |
| 29035              | Carter, MO                | 0.047                | 74.47                     | 74.55                 |
| 29037              | Cass, MO                  | -0.038               | 38.33                     | 11.88                 |
| 29039              | Cedar, MO                 | 0.016                | 63.04                     | 64.11                 |
| 29041              | Chariton, MO              | -0.073               | 22                        | 18.98                 |
| 29043              | Christian, MO             | -0.006               | 53.77                     | 14.97                 |
| 29045              | Clark, MO                 | -0.06                | 27.6                      | 34.2                  |
| 29047              | Clay, MO                  | -0.053               | 31.04                     | 13.63                 |
| 29049              | Clinton, MO               | -0.062               | 26.58                     | 16.43                 |
| 29051              | Cole, MO                  | -0.07                | 22.95                     | 25.83                 |
| 29053              | Cooper, MO                | -0.033               | 41.2                      | 38.92                 |
| 29055              | Crawford, MO              | 0.095                | 85.7                      | 75.54                 |
| 29057              | Dade, MO                  | 0.047                | 74.5                      | 66.37                 |
| 29059              | Dallas, MO                | 0.013                | 61.6                      | 70.19                 |
| 29061              | Daviess, MO               | -0.018               | 47.76                     | 47.07                 |
| 29063              | DeKalb, MO                | -0.021               | 46.07                     | 40.54                 |
| 29065              | Dent, MO                  | 0.017                | 63.45                     | 63.12                 |
| 29067              | Douglas, MO               | 0.016                | 62.88                     | 52.32                 |
| 29069              | Dunklin, MO               | 0.036                | 70.52                     | 95.8                  |
| 29071              | Franklin, MO              | -0.042               | 36.23                     | 14.59                 |
| 29073              | Gasconade, MO             | -0.115               | 9.27                      | 8.54                  |
| 29075              | Gentry, MO                | -0.033               | 41.16                     | 43.89                 |
| 29077              | Greene, MO                | -0.041               | 37.22                     | 43.95                 |
| 29079              | Grundy, MO                | -0.076               | 20.66                     | 61.85                 |
| 29081              | Harrison, MO              | -0.067               | 24.36                     | 74.17                 |
| 29083              | Henry, MO                 | 0.003                | 57.12                     | 59.59                 |
| 29085              | Hickory, MO               | -0.064               | 25.63                     | 46.72                 |
| 29087              | Holt, MO                  | -0.119               | 7.96                      | 19.59                 |
| 29089              | Howard, MO                | -0.024               | 45.11                     | 40.41                 |
| 29091              | Howell, MO                | -0.006               | 53.68                     | 67.17                 |
| 29093              | Iron, MO                  | 0.023                | 65.84                     | 78.22                 |

| <b>County FIPS</b> | <b>County Description</b> | <b>DOS-SVI Index</b> | <b>DOS-SVI Percentile</b> | <b>SVI Percentile</b> |
|--------------------|---------------------------|----------------------|---------------------------|-----------------------|
| 29095              | Jackson, MO               | -0.047               | 33.91                     | 53.54                 |
| 29097              | Jasper, MO                | 0.01                 | 60.27                     | 65.64                 |
| 29099              | Jefferson, MO             | -0.002               | 55.08                     | 18.63                 |
| 29101              | Johnson, MO               | 0.044                | 73.32                     | 35.06                 |
| 29103              | Knox, MO                  | -0.023               | 45.49                     | 55.7                  |
| 29105              | Laclede, MO               | 0.084                | 83.64                     | 61.78                 |
| 29107              | Lafayette, MO             | -0.046               | 34.42                     | 38.82                 |
| 29109              | Lawrence, MO              | 0.048                | 74.69                     | 78.66                 |
| 29111              | Lewis, MO                 | -0.023               | 45.62                     | 44.65                 |
| 29113              | Lincoln, MO               | 0.025                | 66.83                     | 29.39                 |
| 29115              | Linn, MO                  | -0.101               | 12.19                     | 27.2                  |
| 29117              | Livingston, MO            | -0.089               | 16.33                     | 37.48                 |
| 29119              | McDonald, MO              | 0.129                | 91.09                     | 86.31                 |
| 29121              | Macon, MO                 | -0.051               | 31.87                     | 58.6                  |
| 29123              | Madison, MO               | 0.012                | 61.35                     | 47.77                 |
| 29125              | Maries, MO                | 0.003                | 57.59                     | 51.18                 |
| 29127              | Marion, MO                | -0.032               | 41.55                     | 54.59                 |
| 29129              | Mercer, MO                | -0.042               | 36.33                     | 30.45                 |
| 29131              | Miller, MO                | 0.01                 | 60.4                      | 50.1                  |
| 29133              | Mississippi, MO           | 0.029                | 68.19                     | 90.76                 |
| 29135              | Moniteau, MO              | 0.042                | 72.75                     | 51.43                 |
| 29137              | Monroe, MO                | -0.071               | 22.54                     | 38.76                 |
| 29139              | Montgomery, MO            | -0.046               | 34.8                      | 53.31                 |
| 29141              | Morgan, MO                | -0.061               | 27.38                     | 62.9                  |
| 29143              | New Madrid, MO            | 0.035                | 70.01                     | 89.68                 |
| 29145              | Newton, MO                | -0.006               | 53.61                     | 43.41                 |
| 29147              | Nodaway, MO               | -0.038               | 38.65                     | 22.2                  |
| 29149              | Oregon, MO                | -0.067               | 24.48                     | 48.85                 |
| 29151              | Osage, MO                 | -0.047               | 34.03                     | 4.97                  |
| 29153              | Ozark, MO                 | -0.004               | 54.63                     | 58.25                 |
| 29155              | Pemiscot, MO              | 0.087                | 84.24                     | 93.03                 |
| 29157              | Perry, MO                 | -0.039               | 38.08                     | 23.12                 |
| 29159              | Pettis, MO                | -0.005               | 53.87                     | 80.35                 |
| 29161              | Phelps, MO                | 0.009                | 60.08                     | 65.96                 |
| 29163              | Pike, MO                  | -0.026               | 44.13                     | 53.76                 |
| 29165              | Platte, MO                | -0.078               | 19.77                     | 9.59                  |
| 29167              | Polk, MO                  | -0.001               | 55.56                     | 59.87                 |
| 29169              | Pulaski, MO               | 0.134                | 91.91                     | 65.03                 |
| 29171              | Putnam, MO                | -0.089               | 16.24                     | 57.64                 |
| 29173              | Ralls, MO                 | -0.055               | 30.18                     | 10.45                 |
| 29175              | Randolph, MO              | 0.008                | 59.57                     | 55.54                 |
| 29177              | Ray, MO                   | -0.048               | 33.37                     | 25.73                 |
| 29179              | Reynolds, MO              | -0.005               | 53.96                     | 55.73                 |
| 29181              | Ripley, MO                | 0.045                | 73.8                      | 71.5                  |
| 29183              | St. Charles, MO           | -0.074               | 21.46                     | 3.63                  |
| 29185              | St. Clair, MO             | -0.09                | 15.86                     | 49.87                 |
| 29186              | Ste. Genevieve, MO        | -0.07                | 23.02                     | 18.85                 |
| 29187              | St. Francois, MO          | 0.018                | 63.61                     | 70.16                 |
| 29189              | St. Louis, MO             | -0.085               | 17.73                     | 26.11                 |
| 29195              | Saline, MO                | -0.039               | 38.24                     | 81.62                 |
| 29197              | Schuyler, MO              | -0.01                | 51.45                     | 38.31                 |
| 29199              | Scotland, MO              | 0.072                | 80.87                     | 53.03                 |
| 29201              | Scott, MO                 | 0                    | 56                        | 78.44                 |
| 29203              | Shannon, MO               | 0.041                | 72.27                     | 64.49                 |
| 29205              | Shelby, MO                | -0.05                | 32.28                     | 39.84                 |

| <b>County FIPS</b> | <b>County Description</b> | <b>DOS-SVI Index</b> | <b>DOS-SVI Percentile</b> | <b>SVI Percentile</b> |
|--------------------|---------------------------|----------------------|---------------------------|-----------------------|
| 29207              | Stoddard, MO              | -0.016               | 48.49                     | 46.43                 |
| 29209              | Stone, MO                 | -0.08                | 19.1                      | 34.87                 |
| 29211              | Sullivan, MO              | -0.045               | 35.05                     | 62.96                 |
| 29213              | Taney, MO                 | -0.027               | 43.71                     | 82.17                 |
| 29215              | Texas, MO                 | 0.056                | 77.05                     | 83.03                 |
| 29217              | Vernon, MO                | -0.035               | 40.15                     | 45.1                  |
| 29219              | Warren, MO                | 0.051                | 75.45                     | 38.41                 |
| 29221              | Washington, MO            | 0.145                | 93.06                     | 79.04                 |
| 29223              | Wayne, MO                 | 0.096                | 85.93                     | 76.46                 |
| 29225              | Webster, MO               | 0.079                | 82.65                     | 63.85                 |
| 29227              | Worth, MO                 | -0.099               | 12.58                     | 22.39                 |
| 29229              | Wright, MO                | 0.073                | 81.12                     | 90.06                 |
| 29510              | St. Louis City, MO        | 0.009                | 60.11                     | 77.96                 |
| 30001              | Beaverhead, MT            | -0.055               | 29.99                     | 25.16                 |
| 30003              | Big Horn, MT              | 0.514                | 99.62                     | 82.74                 |
| 30005              | Blaine, MT                | 0.331                | 98.98                     | 91.5                  |
| 30007              | Broadwater, MT            | -0.066               | 25.12                     | 4.2                   |
| 30009              | Carbon, MT                | -0.133               | 5.51                      | 4.33                  |
| 30011              | Carter, MT                | -0.105               | 11.4                      | 4.87                  |
| 30013              | Cascade, MT               | -0.05                | 32.44                     | 41.02                 |
| 30015              | Chouteau, MT              | -0.023               | 45.24                     | 47.99                 |
| 30017              | Custer, MT                | -0.11                | 10.19                     | 29.01                 |
| 30019              | Daniels, MT               | -0.198               | 0.67                      | 2.42                  |
| 30021              | Dawson, MT                | -0.061               | 26.9                      | 7.52                  |
| 30023              | Deer Lodge, MT            | -0.126               | 6.56                      | 47.17                 |
| 30025              | Fallon, MT                | -0.044               | 35.5                      | 2.17                  |
| 30027              | Fergus, MT                | -0.1                 | 12.45                     | 23.76                 |
| 30029              | Flathead, MT              | -0.031               | 42.28                     | 9.24                  |
| 30031              | Gallatin, MT              | -0.03                | 42.82                     | 4.27                  |
| 30033              | Garfield, MT              | -0.076               | 20.76                     | 0.76                  |
| 30035              | Glacier, MT               | 0.227                | 97.64                     | 85.83                 |
| 30037              | Golden Valley, MT         | -0.128               | 6.18                      | 5.19                  |
| 30039              | Granite, MT               | -0.09                | 15.7                      | 7.64                  |
| 30041              | Hill, MT                  | 0.028                | 67.81                     | 69.84                 |
| 30043              | Jefferson, MT             | -0.055               | 30.4                      | 4.81                  |
| 30045              | Judith Basin, MT          | -0.123               | 7.32                      | 1.62                  |
| 30047              | Lake, MT                  | 0.017                | 63.23                     | 64.68                 |
| 30049              | Lewis and Clark, MT       | -0.075               | 20.98                     | 12.58                 |
| 30051              | Liberty, MT               | -0.177               | 1.56                      | 40.99                 |
| 30053              | Lincoln, MT               | 0.008                | 59.6                      | 41.94                 |
| 30055              | McCone, MT                | -0.09                | 15.51                     | 7.74                  |
| 30057              | Madison, MT               | -0.164               | 2.26                      | 17.26                 |
| 30059              | Meagher, MT               | -0.118               | 8.18                      | 4.65                  |
| 30061              | Mineral, MT               | -0.044               | 35.66                     | 56.21                 |
| 30063              | Missoula, MT              | -0.042               | 36.29                     | 17.8                  |
| 30065              | Musselshell, MT           | 0.047                | 74.31                     | 35.51                 |
| 30067              | Park, MT                  | -0.113               | 9.74                      | 6.88                  |
| 30069              | Petroleum, MT             | -0.05                | 32.25                     | 0.29                  |
| 30071              | Phillips, MT              | 0.066                | 79.4                      | 41.46                 |
| 30073              | Pondera, MT               | 0.025                | 67.02                     | 82.96                 |
| 30075              | Powder River, MT          | -0.164               | 2.29                      | 3.92                  |
| 30077              | Powell, MT                | -0.092               | 14.9                      | 25.45                 |
| 30079              | Prairie, MT               | -0.086               | 17.1                      | 7.58                  |
| 30081              | Ravalli, MT               | -0.06                | 27.79                     | 18.6                  |
| 30083              | Richland, MT              | -0.009               | 52.02                     | 21.21                 |

| <b>County FIPS</b> | <b>County Description</b> | <b>DOS-SVI Index</b> | <b>DOS-SVI Percentile</b> | <b>SVI Percentile</b> |
|--------------------|---------------------------|----------------------|---------------------------|-----------------------|
| 30085              | Roosevelt, MT             | 0.284                | 98.69                     | 88.79                 |
| 30087              | Rosebud, MT               | 0.2                  | 96.91                     | 60.7                  |
| 30089              | Sanders, MT               | -0.03                | 42.5                      | 34.78                 |
| 30091              | Sheridan, MT              | -0.089               | 16.01                     | 9.49                  |
| 30093              | Silver Bow, MT            | -0.049               | 32.73                     | 52.58                 |
| 30095              | Stillwater, MT            | -0.061               | 27.41                     | 3.6                   |
| 30097              | Sweet Grass, MT           | -0.203               | 0.57                      | 0.86                  |
| 30099              | Teton, MT                 | -0.05                | 32.6                      | 29.81                 |
| 30101              | Toole, MT                 | -0.11                | 10.31                     | 47.68                 |
| 30103              | Treasure, MT              | -0.128               | 6.21                      | 5.67                  |
| 30105              | Valley, MT                | -0.061               | 27.09                     | 11.62                 |
| 30107              | Wheatland, MT             | -0.012               | 50.88                     | 54.36                 |
| 30109              | Wibaux, MT                | -0.099               | 12.67                     | 39.33                 |
| 30111              | Yellowstone, MT           | -0.037               | 38.97                     | 24.97                 |
| 31001              | Adams, NE                 | -0.06                | 27.76                     | 35.92                 |
| 31003              | Antelope, NE              | -0.125               | 6.94                      | 10.32                 |
| 31005              | Arthur, NE                | -0.122               | 7.42                      | 0.83                  |
| 31007              | Banner, NE                | -0.148               | 3.63                      | 0.41                  |
| 31009              | Blaine, NE                | -0.107               | 10.76                     | 9.08                  |
| 31011              | Boone, NE                 | -0.126               | 6.59                      | 2.83                  |
| 31013              | Box Butte, NE             | -0.033               | 41.13                     | 35.86                 |
| 31015              | Boyd, NE                  | -0.157               | 2.61                      | 9.2                   |
| 31017              | Brown, NE                 | -0.173               | 1.85                      | 12.52                 |
| 31019              | Buffalo, NE               | -0.036               | 39.48                     | 26.56                 |
| 31021              | Burt, NE                  | -0.107               | 10.86                     | 25.41                 |
| 31023              | Butler, NE                | -0.088               | 16.75                     | 11.72                 |
| 31025              | Cass, NE                  | -0.069               | 23.94                     | 1.08                  |
| 31027              | Cedar, NE                 | -0.115               | 9.2                       | 1.21                  |
| 31029              | Chase, NE                 | -0.128               | 6.24                      | 15.51                 |
| 31031              | Cherry, NE                | -0.129               | 6.05                      | 22.61                 |
| 31033              | Cheyenne, NE              | -0.057               | 29.23                     | 12.1                  |
| 31035              | Clay, NE                  | -0.069               | 23.66                     | 16.46                 |
| 31037              | Colfax, NE                | 0.083                | 83.38                     | 51.88                 |
| 31039              | Cuming, NE                | -0.112               | 9.9                       | 19.36                 |
| 31041              | Custer, NE                | -0.115               | 9.04                      | 18.18                 |
| 31043              | Dakota, NE                | 0.104                | 87.39                     | 86.15                 |
| 31045              | Dawes, NE                 | -0.11                | 10.38                     | 17.17                 |
| 31047              | Dawson, NE                | -0.006               | 53.23                     | 79.33                 |
| 31049              | Deuel, NE                 | -0.122               | 7.51                      | 16.5                  |
| 31051              | Dixon, NE                 | -0.055               | 30.09                     | 37.9                  |
| 31053              | Dodge, NE                 | -0.051               | 31.9                      | 56.91                 |
| 31055              | Douglas, NE               | -0.036               | 39.7                      | 46.69                 |
| 31057              | Dundy, NE                 | -0.116               | 8.79                      | 30.38                 |
| 31059              | Fillmore, NE              | -0.167               | 2.07                      | 6.18                  |
| 31061              | Franklin, NE              | -0.183               | 1.21                      | 7.68                  |
| 31063              | Frontier, NE              | -0.118               | 8.28                      | 9.94                  |
| 31065              | Furnas, NE                | -0.145               | 3.98                      | 18.25                 |
| 31067              | Gage, NE                  | -0.117               | 8.69                      | 11.05                 |
| 31069              | Garden, NE                | -0.167               | 2.04                      | 1.43                  |
| 31071              | Garfield, NE              | -0.21                | 0.45                      | 4.3                   |
| 31073              | Gosper, NE                | -0.147               | 3.69                      | 0.51                  |
| 31075              | Grant, NE                 | -0.025               | 44.57                     | 13.28                 |
| 31077              | Greeley, NE               | -0.13                | 5.76                      | 4.11                  |
| 31079              | Hall, NE                  | -0.011               | 51.13                     | 67.01                 |
| 31081              | Hamilton, NE              | -0.117               | 8.63                      | 0.89                  |

| <b>County FIPS</b> | <b>County Description</b> | <b>DOS-SVI Index</b> | <b>DOS-SVI Percentile</b> | <b>SVI Percentile</b> |
|--------------------|---------------------------|----------------------|---------------------------|-----------------------|
| 31083              | Harlan, NE                | -0.119               | 8.09                      | 12.39                 |
| 31085              | Hayes, NE                 | -0.122               | 7.61                      | 4.36                  |
| 31087              | Hitchcock, NE             | -0.08                | 19.04                     | 19.43                 |
| 31089              | Holt, NE                  | -0.118               | 8.44                      | 9.81                  |
| 31091              | Hooker, NE                | -0.234               | 0.29                      | 14.68                 |
| 31093              | Howard, NE                | -0.095               | 13.91                     | 8.03                  |
| 31095              | Jefferson, NE             | -0.176               | 1.62                      | 21.85                 |
| 31097              | Johnson, NE               | -0.096               | 13.4                      | 57.77                 |
| 31099              | Kearney, NE               | -0.061               | 27.44                     | 9.39                  |
| 31101              | Keith, NE                 | -0.105               | 11.11                     | 22.68                 |
| 31103              | Keya Paha, NE             | -0.151               | 3.28                      | 0.1                   |
| 31105              | Kimball, NE               | -0.061               | 27.12                     | 56.11                 |
| 31107              | Knox, NE                  | -0.064               | 25.98                     | 32.77                 |
| 31109              | Lancaster, NE             | -0.049               | 32.92                     | 30.25                 |
| 31111              | Lincoln, NE               | -0.075               | 20.95                     | 36.75                 |
| 31113              | Logan, NE                 | -0.019               | 47.41                     | 10.73                 |
| 31115              | Loup, NE                  | -0.207               | 0.48                      | 0.45                  |
| 31117              | McPherson, NE             | -0.037               | 39                        | 8.38                  |
| 31119              | Madison, NE               | -0.049               | 32.89                     | 51.05                 |
| 31121              | Merrick, NE               | -0.078               | 19.74                     | 19.75                 |
| 31123              | Morrill, NE               | -0.054               | 30.82                     | 42.2                  |
| 31125              | Nance, NE                 | -0.12                | 7.8                       | 8.25                  |
| 31127              | Nemaha, NE                | -0.091               | 15.22                     | 16.59                 |
| 31129              | Nuckolls, NE              | -0.189               | 0.99                      | 17.36                 |
| 31131              | Otoe, NE                  | -0.103               | 11.81                     | 22.87                 |
| 31133              | Pawnee, NE                | -0.115               | 8.98                      | 23.18                 |
| 31135              | Perkins, NE               | -0.139               | 4.71                      | 5.38                  |
| 31137              | Phelps, NE                | -0.135               | 5.22                      | 12.26                 |
| 31139              | Pierce, NE                | -0.094               | 13.98                     | 2.29                  |
| 31141              | Platte, NE                | -0.029               | 43.14                     | 29.94                 |
| 31143              | Polk, NE                  | -0.033               | 41.32                     | 19.08                 |
| 31145              | Red Willow, NE            | -0.102               | 11.97                     | 23.73                 |
| 31147              | Richardson, NE            | -0.145               | 3.95                      | 10.25                 |
| 31149              | Rock, NE                  | -0.216               | 0.41                      | 0.92                  |
| 31151              | Saline, NE                | -0.006               | 53.26                     | 59.78                 |
| 31153              | Sarpy, NE                 | -0.026               | 44.09                     | 9.71                  |
| 31155              | Saunders, NE              | -0.095               | 13.79                     | 4.24                  |
| 31157              | Scotts Bluff, NE          | -0.061               | 27.19                     | 56.75                 |
| 31159              | Seward, NE                | -0.096               | 13.47                     | 4.68                  |
| 31161              | Sheridan, NE              | -0.089               | 16.4                      | 59.68                 |
| 31163              | Sherman, NE               | -0.145               | 4.08                      | 7.39                  |
| 31165              | Sioux, NE                 | -0.141               | 4.42                      | 1.78                  |
| 31167              | Stanton, NE               | -0.079               | 19.32                     | 5.7                   |
| 31169              | Thayer, NE                | -0.176               | 1.59                      | 5.8                   |
| 31171              | Thomas, NE                | -0.155               | 2.8                       | 0.35                  |
| 31173              | Thurston, NE              | 0.438                | 99.46                     | 88.66                 |
| 31175              | Valley, NE                | -0.151               | 3.25                      | 14.84                 |
| 31177              | Washington, NE            | -0.096               | 13.53                     | 3.79                  |
| 31179              | Wayne, NE                 | -0.073               | 21.71                     | 8.47                  |
| 31181              | Webster, NE               | -0.135               | 5.19                      | 10.92                 |
| 31183              | Wheeler, NE               | -0.155               | 2.93                      | 0.48                  |
| 31185              | York, NE                  | -0.104               | 11.49                     | 18.28                 |
| 32001              | Churchill, NV             | 0.034                | 69.88                     | 60.48                 |
| 32003              | Clark, NV                 | 0.032                | 69.18                     | 74.04                 |
| 32005              | Douglas, NV               | -0.122               | 7.58                      | 17.93                 |



| <b>County FIPS</b> | <b>County Description</b> | <b>DOS-SVI Index</b> | <b>DOS-SVI Percentile</b> | <b>SVI Percentile</b> |
|--------------------|---------------------------|----------------------|---------------------------|-----------------------|
| 32007              | Elko, NV                  | 0.077                | 82.23                     | 51.78                 |
| 32009              | Esmeralda, NV             | -0.037               | 39.38                     | 63.95                 |
| 32011              | Eureka, NV                | -0.026               | 44.06                     | 6.75                  |
| 32013              | Humboldt, NV              | 0.136                | 92.14                     | 58.69                 |
| 32015              | Lander, NV                | 0.21                 | 97.14                     | 82.61                 |
| 32017              | Lincoln, NV               | 0.023                | 65.81                     | 42.13                 |
| 32019              | Lyon, NV                  | 0.051                | 75.52                     | 57.83                 |
| 32021              | Mineral, NV               | 0.134                | 91.79                     | 88.15                 |
| 32023              | Nye, NV                   | 0.047                | 74.28                     | 73.09                 |
| 32027              | Pershing, NV              | 0.168                | 94.94                     | 90.38                 |
| 32029              | Storey, NV                | -0.181               | 1.3                       | 7.17                  |
| 32031              | Washoe, NV                | 0.011                | 61                        | 52.71                 |
| 32033              | White Pine, NV            | 0.007                | 59.22                     | 37.42                 |
| 32510              | Carson City, NV           | -0.009               | 52.12                     | 84.43                 |
| 33001              | Belknap, NH               | -0.09                | 15.47                     | 8.41                  |
| 33003              | Carroll, NH               | -0.161               | 2.42                      | 5.83                  |
| 33005              | Cheshire, NH              | -0.108               | 10.7                      | 14.17                 |
| 33007              | Coos, NH                  | -0.088               | 16.62                     | 52.9                  |
| 33009              | Grafton, NH               | -0.115               | 9.17                      | 18.82                 |
| 33011              | Hillsborough, NH          | -0.073               | 21.78                     | 19.11                 |
| 33013              | Merrimack, NH             | -0.091               | 15.25                     | 14.55                 |
| 33015              | Rockingham, NH            | -0.1                 | 12.35                     | 1.11                  |
| 33017              | Strafford, NH             | -0.047               | 33.81                     | 17.48                 |
| 33019              | Sullivan, NH              | -0.124               | 7.1                       | 15.13                 |
| 34001              | Atlantic, NJ              | 0.015                | 62.18                     | 79.11                 |
| 34003              | Bergen, NJ                | -0.076               | 20.54                     | 23.95                 |
| 34005              | Burlington, NJ            | -0.045               | 34.89                     | 20.54                 |
| 34007              | Camden, NJ                | -0.028               | 43.52                     | 61.18                 |
| 34009              | Cape May, NJ              | -0.084               | 17.83                     | 33.98                 |
| 34011              | Cumberland, NJ            | 0.024                | 66.25                     | 95.92                 |
| 34013              | Essex, NJ                 | 0.053                | 75.77                     | 84.04                 |
| 34015              | Gloucester, NJ            | -0.029               | 43.23                     | 16.75                 |
| 34017              | Hudson, NJ                | 0.048                | 74.53                     | 64.24                 |
| 34019              | Hunterdon, NJ             | -0.106               | 11.05                     | 2.64                  |
| 34021              | Mercer, NJ                | -0.03                | 42.6                      | 55.8                  |
| 34023              | Middlesex, NJ             | 0.001                | 56.61                     | 46.59                 |
| 34025              | Monmouth, NJ              | -0.069               | 23.75                     | 16.05                 |
| 34027              | Morris, NJ                | -0.077               | 20.34                     | 12.01                 |
| 34029              | Ocean, NJ                 | -0.042               | 36.42                     | 33.54                 |
| 34031              | Passaic, NJ               | 0.037                | 70.74                     | 77.64                 |
| 34033              | Salem, NJ                 | -0.03                | 42.66                     | 59.01                 |
| 34035              | Somerset, NJ              | -0.066               | 25.02                     | 10                    |
| 34037              | Sussex, NJ                | -0.056               | 29.96                     | 1.91                  |
| 34039              | Union, NJ                 | -0.006               | 53.39                     | 62.32                 |
| 34041              | Warren, NJ                | -0.057               | 29.16                     | 21.78                 |
| 35001              | Bernalillo, NM            | -0.006               | 53.42                     | 68.28                 |
| 35003              | Catron, NM                | -0.252               | 0.16                      | 33.57                 |
| 35005              | Chaves, NM                | 0.041                | 72.24                     | 95.51                 |
| 35006              | Cibola, NM                | 0.35                 | 99.14                     | 99.84                 |
| 35007              | Colfax, NM                | 0.018                | 63.67                     | 96.27                 |
| 35009              | Curry, NM                 | 0.069                | 80.36                     | 87.74                 |
| 35011              | De Baca, NM               | -0.015               | 49.09                     | 69.39                 |
| 35013              | Dona Ana, NM              | 0.118                | 89.78                     | 98.41                 |
| 35015              | Eddy, NM                  | 0.054                | 76.41                     | 70.32                 |
| 35017              | Grant, NM                 | 0.023                | 65.78                     | 92.96                 |

| <b>County FIPS</b> | <b>County Description</b> | <b>DOS-SVI Index</b> | <b>DOS-SVI Percentile</b> | <b>SVI Percentile</b> |
|--------------------|---------------------------|----------------------|---------------------------|-----------------------|
| 35019              | Guadalupe, NM             | -0.017               | 48.17                     | 95.29                 |
| 35021              | Harding, NM               | -0.149               | 3.44                      | 36.15                 |
| 35023              | Hidalgo, NM               | 0.115                | 89.46                     | 96.31                 |
| 35025              | Lea, NM                   | 0.151                | 93.79                     | 92.17                 |
| 35027              | Lincoln, NM               | -0.081               | 18.91                     | 47.96                 |
| 35028              | Los Alamos, NM            | -0.098               | 12.99                     | 2.48                  |
| 35029              | Luna, NM                  | 0.171                | 95.03                     | 99.9                  |
| 35031              | McKinley, NM              | 0.505                | 99.59                     | 98.89                 |
| 35033              | Mora, NM                  | 0.066                | 79.62                     | 79.59                 |
| 35035              | Otero, NM                 | 0.102                | 86.98                     | 91.4                  |
| 35037              | Quay, NM                  | -0.041               | 36.96                     | 80.96                 |
| 35041              | Roosevelt, NM             | 0.149                | 93.5                      | 94.3                  |
| 35043              | Sandoval, NM              | 0.059                | 77.81                     | 48.18                 |
| 35045              | San Juan, NM              | 0.23                 | 97.77                     | 91.94                 |
| 35047              | San Miguel, NM            | 0.017                | 63.2                      | 98.63                 |
| 35049              | Santa Fe, NM              | -0.083               | 18.21                     | 52.55                 |
| 35051              | Sierra, NM                | -0.041               | 37.03                     | 91.46                 |
| 35053              | Socorro, NM               | 0.071                | 80.74                     | 97.45                 |
| 35055              | Taos, NM                  | -0.009               | 52.21                     | 85.86                 |
| 35057              | Torrance, NM              | 0.093                | 85.42                     | 74.9                  |
| 35059              | Union, NM                 | -0.115               | 9.11                      | 67.93                 |
| 35061              | Valencia, NM              | 0.119                | 89.88                     | 90.41                 |
| 36001              | Albany, NY                | -0.085               | 17.45                     | 30.41                 |
| 36003              | Allegany, NY              | 0                    | 56.03                     | 58.18                 |
| 36005              | Bronx, NY                 | 0.189                | 96.37                     | 99.27                 |
| 36007              | Broome, NY                | -0.038               | 38.46                     | 61.66                 |
| 36009              | Cattaraugus, NY           | 0.004                | 57.62                     | 72.83                 |
| 36011              | Cayuga, NY                | -0.067               | 24.51                     | 50.25                 |
| 36013              | Chautauqua, NY            | -0.027               | 43.74                     | 72.48                 |
| 36015              | Chemung, NY               | -0.073               | 21.75                     | 48.5                  |
| 36017              | Chenango, NY              | -0.006               | 53.14                     | 56.46                 |
| 36019              | Clinton, NY               | -0.045               | 35.21                     | 53.12                 |
| 36021              | Columbia, NY              | -0.108               | 10.66                     | 38.54                 |
| 36023              | Cortland, NY              | -0.05                | 32.57                     | 34.52                 |
| 36025              | Delaware, NY              | -0.066               | 25.09                     | 63.31                 |
| 36027              | Dutchess, NY              | -0.01                | 51.64                     | 42.07                 |
| 36029              | Erie, NY                  | -0.082               | 18.69                     | 41.4                  |
| 36031              | Essex, NY                 | -0.086               | 17.32                     | 38.69                 |
| 36033              | Franklin, NY              | 0.011                | 60.87                     | 70.73                 |
| 36035              | Fulton, NY                | -0.061               | 27.35                     | 50.1                  |
| 36037              | Genesee, NY               | -0.077               | 20.41                     | 58.79                 |
| 36039              | Greene, NY                | -0.071               | 22.76                     | 41.59                 |
| 36041              | Hamilton, NY              | -0.093               | 14.42                     | 38.98                 |
| 36043              | Herkimer, NY              | -0.014               | 49.51                     | 53.22                 |
| 36045              | Jefferson, NY             | 0.045                | 73.61                     | 64.84                 |
| 36047              | Kings, NY                 | 0.151                | 93.76                     | 81.53                 |
| 36049              | Lewis, NY                 | 0.013                | 61.54                     | 29.11                 |
| 36051              | Livingston, NY            | -0.054               | 30.44                     | 34.24                 |
| 36053              | Madison, NY               | -0.05                | 32.22                     | 16.66                 |
| 36055              | Monroe, NY                | -0.065               | 25.37                     | 52.04                 |
| 36057              | Montgomery, NY            | 0.001                | 56.48                     | 83.06                 |
| 36059              | Nassau, NY                | -0.068               | 24.29                     | 24.3                  |
| 36061              | New York, NY              | -0.056               | 29.89                     | 55.1                  |
| 36063              | Niagara, NY               | -0.078               | 20.02                     | 33.18                 |
| 36065              | Oneida, NY                | -0.055               | 30.21                     | 69.46                 |

| <b>County FIPS</b> | <b>County Description</b> | <b>DOS-SVI Index</b> | <b>DOS-SVI Percentile</b> | <b>SVI Percentile</b> |
|--------------------|---------------------------|----------------------|---------------------------|-----------------------|
| 36067              | Onondaga, NY              | -0.053               | 31.07                     | 52.07                 |
| 36069              | Ontario, NY               | -0.095               | 13.69                     | 23.15                 |
| 36071              | Orange, NY                | 0.029                | 68.16                     | 55.38                 |
| 36073              | Orleans, NY               | -0.031               | 42.06                     | 64.3                  |
| 36075              | Oswego, NY                | 0.042                | 72.65                     | 64.97                 |
| 36077              | Otsego, NY                | -0.03                | 42.92                     | 42.36                 |
| 36079              | Putnam, NY                | -0.056               | 29.51                     | 8.12                  |
| 36081              | Queens, NY                | 0.086                | 84.18                     | 62.01                 |
| 36083              | Rensselaer, NY            | -0.068               | 24.26                     | 34.3                  |
| 36085              | Richmond, NY              | -0.004               | 54.44                     | 47.64                 |
| 36087              | Rockland, NY              | 0.084                | 83.57                     | 60.38                 |
| 36089              | St. Lawrence, NY          | 0.02                 | 64.53                     | 74.75                 |
| 36091              | Saratoga, NY              | -0.088               | 16.46                     | 4.75                  |
| 36093              | Schenectady, NY           | -0.034               | 40.81                     | 39.43                 |
| 36095              | Schoharie, NY             | -0.076               | 20.79                     | 40.13                 |
| 36097              | Schuyler, NY              | -0.023               | 45.27                     | 36.91                 |
| 36099              | Seneca, NY                | -0.074               | 21.55                     | 44.9                  |
| 36101              | Steuben, NY               | -0.02                | 46.86                     | 46.91                 |
| 36103              | Suffolk, NY               | -0.044               | 35.53                     | 21.46                 |
| 36105              | Sullivan, NY              | 0.014                | 61.89                     | 79.39                 |
| 36107              | Tioga, NY                 | -0.024               | 44.83                     | 19.94                 |
| 36109              | Tompkins, NY              | -0.038               | 38.71                     | 34.62                 |
| 36111              | Ulster, NY                | -0.049               | 32.82                     | 47.04                 |
| 36113              | Warren, NY                | -0.113               | 9.68                      | 17.42                 |
| 36115              | Washington, NY            | -0.044               | 35.44                     | 40                    |
| 36117              | Wayne, NY                 | -0.037               | 39.03                     | 34.14                 |
| 36119              | Westchester, NY           | -0.032               | 41.48                     | 55.16                 |
| 36121              | Wyoming, NY               | -0.037               | 39.41                     | 31.21                 |
| 36123              | Yates, NY                 | -0.018               | 47.88                     | 43.92                 |
| 37001              | Alamance, NC              | -0.009               | 52.18                     | 78.38                 |
| 37003              | Alexander, NC             | 0.067                | 79.88                     | 63.41                 |
| 37005              | Alleghany, NC             | -0.077               | 20.06                     | 62.68                 |
| 37007              | Anson, NC                 | 0.124                | 90.48                     | 94.43                 |
| 37009              | Ashe, NC                  | -0.087               | 17                        | 49.94                 |
| 37011              | Avery, NC                 | -0.051               | 31.84                     | 64.46                 |
| 37013              | Beaufort, NC              | 0.025                | 66.64                     | 71.56                 |
| 37015              | Bertie, NC                | 0.148                | 93.44                     | 93.85                 |
| 37017              | Bladen, NC                | 0.062                | 78.61                     | 94.46                 |
| 37019              | Brunswick, NC             | -0.088               | 16.55                     | 35.83                 |
| 37021              | Buncombe, NC              | -0.036               | 39.64                     | 37.99                 |
| 37023              | Burke, NC                 | 0.084                | 83.6                      | 84.87                 |
| 37025              | Cabarrus, NC              | 0.056                | 76.98                     | 41.75                 |
| 37027              | Caldwell, NC              | 0.011                | 60.97                     | 65.1                  |
| 37029              | Camden, NC                | 0.049                | 75.04                     | 30.7                  |
| 37031              | Carteret, NC              | -0.071               | 22.57                     | 42.55                 |
| 37033              | Caswell, NC               | 0.042                | 72.72                     | 83.6                  |
| 37035              | Catawba, NC               | 0.037                | 70.68                     | 64.81                 |
| 37037              | Chatham, NC               | -0.076               | 20.5                      | 38.09                 |
| 37039              | Cherokee, NC              | -0.048               | 33.27                     | 48.69                 |
| 37041              | Chowan, NC                | 0.054                | 76.38                     | 81.18                 |
| 37043              | Clay, NC                  | -0.153               | 3.12                      | 21.91                 |
| 37045              | Cleveland, NC             | 0.074                | 81.63                     | 83.5                  |
| 37047              | Columbus, NC              | 0.058                | 77.52                     | 94.81                 |
| 37049              | Craven, NC                | 0.035                | 70.36                     | 80.99                 |
| 37051              | Cumberland, NC            | 0.085                | 83.86                     | 86.4                  |

| <b>County FIPS</b> | <b>County Description</b> | <b>DOS-SVI Index</b> | <b>DOS-SVI Percentile</b> | <b>SVI Percentile</b> |
|--------------------|---------------------------|----------------------|---------------------------|-----------------------|
| 37053              | Currituck, NC             | -0.011               | 51.16                     | 11.94                 |
| 37055              | Dare, NC                  | -0.057               | 29.32                     | 14.49                 |
| 37057              | Davidson, NC              | 0.035                | 70.07                     | 68.41                 |
| 37059              | Davie, NC                 | -0.005               | 53.93                     | 44.11                 |
| 37061              | Duplin, NC                | 0.171                | 95                        | 97.9                  |
| 37063              | Durham, NC                | -0.032               | 41.8                      | 61.97                 |
| 37065              | Edgecombe, NC             | 0.056                | 76.92                     | 97.26                 |
| 37067              | Forsyth, NC               | -0.011               | 51.1                      | 68.34                 |
| 37069              | Franklin, NC              | 0.042                | 72.56                     | 63.76                 |
| 37071              | Gaston, NC                | 0.03                 | 68.51                     | 67.2                  |
| 37073              | Gates, NC                 | 0.048                | 74.78                     | 35.67                 |
| 37075              | Graham, NC                | 0.019                | 64.15                     | 63.38                 |
| 37077              | Granville, NC             | -0.005               | 54.06                     | 65.61                 |
| 37079              | Greene, NC                | 0.162                | 94.65                     | 99.24                 |
| 37081              | Guilford, NC              | -0.021               | 46.42                     | 63.69                 |
| 37083              | Halifax, NC               | 0.041                | 72.36                     | 96.46                 |
| 37085              | Harnett, NC               | 0.125                | 90.61                     | 78.69                 |
| 37087              | Haywood, NC               | -0.091               | 15.41                     | 28.09                 |
| 37089              | Henderson, NC             | -0.113               | 9.71                      | 32.1                  |
| 37091              | Hertford, NC              | 0.106                | 87.84                     | 98.73                 |
| 37093              | Hoke, NC                  | 0.164                | 94.68                     | 89.24                 |
| 37095              | Hyde, NC                  | 0.147                | 93.28                     | 86.27                 |
| 37097              | Iredell, NC               | 0.017                | 63.52                     | 37.45                 |
| 37099              | Jackson, NC               | -0.03                | 42.57                     | 62.36                 |
| 37101              | Johnston, NC              | 0.043                | 72.88                     | 53.95                 |
| 37103              | Jones, NC                 | 0.087                | 84.34                     | 87.61                 |
| 37105              | Lee, NC                   | 0.064                | 78.96                     | 84.81                 |
| 37107              | Lenoir, NC                | 0.127                | 90.83                     | 99.33                 |
| 37109              | Lincoln, NC               | 0.023                | 66.16                     | 35.64                 |
| 37111              | McDowell, NC              | 0.031                | 69.09                     | 78.95                 |
| 37113              | Macon, NC                 | -0.107               | 10.89                     | 35.48                 |
| 37115              | Madison, NC               | -0.008               | 52.44                     | 45.86                 |
| 37117              | Martin, NC                | 0.043                | 72.97                     | 75.41                 |
| 37119              | Mecklenburg, NC           | -0.011               | 51.35                     | 44.08                 |
| 37121              | Mitchell, NC              | -0.09                | 15.63                     | 42.23                 |
| 37123              | Montgomery, NC            | 0.043                | 73.07                     | 87.13                 |
| 37125              | Moore, NC                 | -0.06                | 27.64                     | 36.21                 |
| 37127              | Nash, NC                  | 0.025                | 66.73                     | 82.87                 |
| 37129              | New Hanover, NC           | -0.055               | 30.15                     | 37.71                 |
| 37131              | Northampton, NC           | -0.049               | 32.95                     | 90.22                 |
| 37133              | Onslow, NC                | 0.138                | 92.26                     | 74.65                 |
| 37135              | Orange, NC                | -0.027               | 43.9                      | 29.59                 |
| 37137              | Pamlico, NC               | -0.009               | 52.15                     | 71.62                 |
| 37139              | Pasquotank, NC            | 0.014                | 62.02                     | 77.48                 |
| 37141              | Pender, NC                | 0.074                | 81.53                     | 54.78                 |
| 37143              | Perquimans, NC            | -0.041               | 37.15                     | 50.48                 |
| 37145              | Person, NC                | 0.068                | 80.26                     | 77.32                 |
| 37147              | Pitt, NC                  | 0.084                | 83.51                     | 82.42                 |
| 37149              | Polk, NC                  | -0.101               | 12.26                     | 38.25                 |
| 37151              | Randolph, NC              | 0.018                | 63.64                     | 69.65                 |
| 37153              | Richmond, NC              | 0.102                | 87.11                     | 97.96                 |
| 37155              | Robeson, NC               | 0.172                | 95.13                     | 99.11                 |
| 37157              | Rockingham, NC            | -0.004               | 54.54                     | 78.57                 |
| 37159              | Rowan, NC                 | 0.044                | 73.45                     | 81.43                 |
| 37161              | Rutherford, NC            | 0.034                | 69.82                     | 75.51                 |

| <b>County FIPS</b> | <b>County Description</b> | <b>DOS-SVI Index</b> | <b>DOS-SVI Percentile</b> | <b>SVI Percentile</b> |
|--------------------|---------------------------|----------------------|---------------------------|-----------------------|
| 37163              | Sampson, NC               | 0.143                | 92.71                     | 97.23                 |
| 37165              | Scotland, NC              | 0.189                | 96.28                     | 99.36                 |
| 37167              | Stanly, NC                | 0.016                | 62.75                     | 63.25                 |
| 37169              | Stokes, NC                | -0.007               | 52.85                     | 30.67                 |
| 37171              | Surry, NC                 | 0.001                | 56.51                     | 72.58                 |
| 37173              | Swain, NC                 | 0.071                | 80.64                     | 77.74                 |
| 37175              | Transylvania, NC          | -0.103               | 11.78                     | 39.75                 |
| 37177              | Tyrrell, NC               | -0.002               | 55.3                      | 87.64                 |
| 37179              | Union, NC                 | 0.044                | 73.16                     | 18.73                 |
| 37181              | Vance, NC                 | 0.101                | 86.72                     | 97.87                 |
| 37183              | Wake, NC                  | -0.019               | 47.47                     | 27.74                 |
| 37185              | Warren, NC                | 0.041                | 72.05                     | 89.43                 |
| 37187              | Washington, NC            | -0.028               | 43.43                     | 87.87                 |
| 37189              | Watauga, NC               | 0.01                 | 60.33                     | 41.21                 |
| 37191              | Wayne, NC                 | 0.07                 | 80.48                     | 95.03                 |
| 37193              | Wilkes, NC                | 0.005                | 58.61                     | 69.24                 |
| 37195              | Wilson, NC                | 0.055                | 76.63                     | 93.6                  |
| 37197              | Yadkin, NC                | 0.015                | 62.21                     | 64.04                 |
| 37199              | Yancey, NC                | -0.011               | 51.19                     | 57.36                 |
| 38001              | Adams, ND                 | -0.15                | 3.38                      | 2.99                  |
| 38003              | Barnes, ND                | -0.133               | 5.54                      | 12.45                 |
| 38005              | Benson, ND                | 0.213                | 97.29                     | 84.33                 |
| 38007              | Billings, ND              | -0.043               | 35.94                     | 3.12                  |
| 38009              | Bottineau, ND             | -0.1                 | 12.42                     | 6.91                  |
| 38011              | Bowman, ND                | -0.056               | 29.8                      | 17.55                 |
| 38013              | Burke, ND                 | -0.006               | 53.45                     | 0.7                   |
| 38015              | Burleigh, ND              | -0.093               | 14.23                     | 17.39                 |
| 38017              | Cass, ND                  | -0.083               | 18.37                     | 14.27                 |
| 38019              | Cavalier, ND              | -0.178               | 1.4                       | 1.72                  |
| 38021              | Dickey, ND                | -0.081               | 18.82                     | 11.59                 |
| 38023              | Divide, ND                | -0.238               | 0.26                      | 3.34                  |
| 38025              | Dunn, ND                  | 0.014                | 62.08                     | 22.26                 |
| 38027              | Eddy, ND                  | -0.194               | 0.8                       | 29.04                 |
| 38029              | Emmons, ND                | -0.205               | 0.51                      | 9.55                  |
| 38031              | Foster, ND                | -0.142               | 4.39                      | 1.75                  |
| 38033              | Golden Valley, ND         | -0.117               | 8.53                      | 9.3                   |
| 38035              | Grand Forks, ND           | -0.046               | 34.58                     | 30.29                 |
| 38037              | Grant, ND                 | -0.129               | 5.99                      | 7.1                   |
| 38039              | Griggs, ND                | -0.251               | 0.19                      | 7.32                  |
| 38041              | Hettinger, ND             | -0.177               | 1.5                       | 5.61                  |
| 38043              | Kidder, ND                | -0.086               | 17.38                     | 2.9                   |
| 38045              | LaMoure, ND               | -0.177               | 1.53                      | 4.43                  |
| 38047              | Logan, ND                 | -0.183               | 1.24                      | 3.82                  |
| 38049              | McHenry, ND               | -0.124               | 7.13                      | 2.96                  |
| 38051              | McIntosh, ND              | -0.283               | 0.1                       | 10.61                 |
| 38053              | McKenzie, ND              | 0.15                 | 93.73                     | 39.2                  |
| 38055              | McLean, ND                | -0.127               | 6.46                      | 8.34                  |
| 38057              | Mercer, ND                | -0.079               | 19.58                     | 10.16                 |
| 38059              | Morton, ND                | -0.052               | 31.61                     | 10.35                 |
| 38061              | Mountrail, ND             | 0.116                | 89.49                     | 37.58                 |
| 38063              | Nelson, ND                | -0.203               | 0.54                      | 3.5                   |
| 38065              | Oliver, ND                | -0.072               | 22.29                     | 21.08                 |
| 38067              | Pembina, ND               | -0.124               | 7.07                      | 4.17                  |
| 38069              | Pierce, ND                | -0.174               | 1.72                      | 19.14                 |
| 38071              | Ramsey, ND                | -0.134               | 5.29                      | 35.32                 |

| <b>County FIPS</b> | <b>County Description</b> | <b>DOS-SVI Index</b> | <b>DOS-SVI Percentile</b> | <b>SVI Percentile</b> |
|--------------------|---------------------------|----------------------|---------------------------|-----------------------|
| 38073              | Ransom, ND                | -0.186               | 1.11                      | 8.57                  |
| 38075              | Renville, ND              | -0.078               | 19.64                     | 2.8                   |
| 38077              | Richland, ND              | -0.092               | 14.84                     | 12.17                 |
| 38079              | Rolette, ND               | 0.188                | 96.24                     | 90.7                  |
| 38081              | Sargent, ND               | -0.138               | 4.81                      | 2.32                  |
| 38083              | Sheridan, ND              | -0.196               | 0.73                      | 7.42                  |
| 38085              | Sioux, ND                 | 0.496                | 99.52                     | 88.44                 |
| 38087              | Slope, ND                 | -0.173               | 1.75                      | 1.37                  |
| 38089              | Stark, ND                 | -0.008               | 52.66                     | 21.4                  |
| 38091              | Steele, ND                | -0.129               | 6.02                      | 0.19                  |
| 38093              | Stutsman, ND              | -0.098               | 12.89                     | 24.24                 |
| 38095              | Towner, ND                | -0.058               | 28.49                     | 19.46                 |
| 38097              | Traill, ND                | -0.104               | 11.65                     | 9.27                  |
| 38099              | Walsh, ND                 | -0.117               | 8.56                      | 36.82                 |
| 38101              | Ward, ND                  | -0.018               | 48.01                     | 16.78                 |
| 38103              | Wells, ND                 | -0.153               | 3.09                      | 6.11                  |
| 38105              | Williams, ND              | -0.001               | 55.81                     | 25.1                  |
| 39001              | Adams, OH                 | 0.053                | 75.93                     | 77.04                 |
| 39003              | Allen, OH                 | -0.042               | 36.36                     | 57.93                 |
| 39005              | Ashland, OH               | -0.041               | 36.99                     | 43.34                 |
| 39007              | Ashtabula, OH             | 0.012                | 61.29                     | 78.57                 |
| 39009              | Athens, OH                | 0.074                | 81.5                      | 73.25                 |
| 39011              | Auglaize, OH              | -0.078               | 19.96                     | 5.35                  |
| 39013              | Belmont, OH               | -0.066               | 24.99                     | 35.96                 |
| 39015              | Brown, OH                 | -0.002               | 55.33                     | 40.48                 |
| 39017              | Butler, OH                | -0.031               | 42.15                     | 36.18                 |
| 39019              | Carroll, OH               | -0.06                | 27.48                     | 15.38                 |
| 39021              | Champaign, OH             | -0.034               | 40.62                     | 29.78                 |
| 39023              | Clark, OH                 | -0.035               | 40.24                     | 72.71                 |
| 39025              | Clermont, OH              | -0.05                | 32.16                     | 10.29                 |
| 39027              | Clinton, OH               | -0.012               | 50.84                     | 44.24                 |
| 39029              | Columbiana, OH            | -0.012               | 50.78                     | 48.54                 |
| 39031              | Coshocton, OH             | 0.026                | 67.27                     | 62.07                 |
| 39033              | Crawford, OH              | -0.089               | 16.3                      | 31.91                 |
| 39035              | Cuyahoga, OH              | -0.036               | 39.86                     | 68.09                 |
| 39037              | Darke, OH                 | -0.057               | 28.84                     | 13.47                 |
| 39039              | Defiance, OH              | -0.064               | 25.76                     | 21.66                 |
| 39041              | Delaware, OH              | -0.06                | 27.83                     | 1.66                  |
| 39043              | Erie, OH                  | -0.11                | 10.22                     | 29.14                 |
| 39045              | Fairfield, OH             | -0.044               | 35.63                     | 23.54                 |
| 39047              | Fayette, OH               | -0.045               | 35.37                     | 50.16                 |
| 39049              | Franklin, OH              | -0.02                | 47.12                     | 51.24                 |
| 39051              | Fulton, OH                | -0.034               | 40.66                     | 17.77                 |
| 39053              | Gallia, OH                | 0.034                | 69.6                      | 66.4                  |
| 39055              | Geauga, OH                | -0.068               | 24.23                     | 9.01                  |
| 39057              | Greene, OH                | -0.065               | 25.28                     | 20.76                 |
| 39059              | Guernsey, OH              | 0.001                | 56.45                     | 67.07                 |
| 39061              | Hamilton, OH              | -0.038               | 38.68                     | 53.69                 |
| 39063              | Hancock, OH               | -0.064               | 25.91                     | 21.11                 |
| 39065              | Hardin, OH                | 0.027                | 67.3                      | 47.1                  |
| 39067              | Harrison, OH              | -0.02                | 46.99                     | 51.94                 |
| 39069              | Henry, OH                 | -0.088               | 16.68                     | 15.57                 |
| 39071              | Highland, OH              | 0.022                | 65.36                     | 68.98                 |
| 39073              | Hocking, OH               | 0.003                | 57.47                     | 46.85                 |
| 39075              | Holmes, OH                | 0.108                | 88.12                     | 43.6                  |

| <b>County FIPS</b> | <b>County Description</b> | <b>DOS-SVI Index</b> | <b>DOS-SVI Percentile</b> | <b>SVI Percentile</b> |
|--------------------|---------------------------|----------------------|---------------------------|-----------------------|
| 39077              | Huron, OH                 | -0.032               | 41.64                     | 43.25                 |
| 39079              | Jackson, OH               | 0.104                | 87.49                     | 77.26                 |
| 39081              | Jefferson, OH             | -0.042               | 36.39                     | 54.94                 |
| 39083              | Knox, OH                  | -0.034               | 40.75                     | 29.43                 |
| 39085              | Lake, OH                  | -0.116               | 8.91                      | 12.93                 |
| 39087              | Lawrence, OH              | -0.009               | 51.96                     | 55.83                 |
| 39089              | Licking, OH               | -0.037               | 38.87                     | 22.9                  |
| 39091              | Logan, OH                 | -0.013               | 50.08                     | 31.69                 |
| 39093              | Lorain, OH                | -0.058               | 28.75                     | 50.89                 |
| 39095              | Lucas, OH                 | -0.026               | 44                        | 68.76                 |
| 39097              | Madison, OH               | -0.039               | 37.79                     | 33.82                 |
| 39099              | Mahoning, OH              | -0.056               | 29.86                     | 58.89                 |
| 39101              | Marion, OH                | -0.011               | 51.32                     | 64.14                 |
| 39103              | Medina, OH                | -0.089               | 16.08                     | 1.02                  |
| 39105              | Meigs, OH                 | 0.079                | 82.55                     | 67.87                 |
| 39107              | Mercer, OH                | -0.063               | 26.07                     | 5.1                   |
| 39109              | Miami, OH                 | -0.077               | 20.25                     | 11.91                 |
| 39111              | Monroe, OH                | -0.048               | 33.4                      | 44.3                  |
| 39113              | Montgomery, OH            | -0.039               | 38.14                     | 67.26                 |
| 39115              | Morgan, OH                | -0.03                | 42.69                     | 56.59                 |
| 39117              | Morrow, OH                | -0.008               | 52.37                     | 19.2                  |
| 39119              | Muskingum, OH             | -0.006               | 53.74                     | 59.81                 |
| 39121              | Noble, OH                 | -0.066               | 24.9                      | 42.93                 |
| 39123              | Ottawa, OH                | -0.12                | 7.74                      | 15.41                 |
| 39125              | Paulding, OH              | -0.024               | 45.15                     | 28.85                 |
| 39127              | Perry, OH                 | 0.039                | 71.57                     | 55.45                 |
| 39129              | Pickaway, OH              | -0.035               | 40.18                     | 28.18                 |
| 39131              | Pike, OH                  | 0.082                | 83.19                     | 79.94                 |
| 39133              | Portage, OH               | -0.039               | 38.17                     | 24.55                 |
| 39135              | Preble, OH                | -0.048               | 33.62                     | 16.91                 |
| 39137              | Putnam, OH                | -0.06                | 27.67                     | 1.53                  |
| 39139              | Richland, OH              | -0.03                | 42.41                     | 61.69                 |
| 39141              | Ross, OH                  | 0.034                | 69.79                     | 72.55                 |
| 39143              | Sandusky, OH              | -0.077               | 20.12                     | 39.87                 |
| 39145              | Scioto, OH                | 0.035                | 69.98                     | 83.47                 |
| 39147              | Seneca, OH                | -0.074               | 21.62                     | 37.55                 |
| 39149              | Shelby, OH                | -0.035               | 40.34                     | 18.92                 |
| 39151              | Stark, OH                 | -0.069               | 23.3                      | 36.66                 |
| 39153              | Summit, OH                | -0.072               | 22.32                     | 33.34                 |
| 39155              | Trumbull, OH              | -0.087               | 16.91                     | 46.4                  |
| 39157              | Tuscarawas, OH            | -0.054               | 30.56                     | 34.43                 |
| 39159              | Union, OH                 | -0.041               | 37.47                     | 7.71                  |
| 39161              | Van Wert, OH              | -0.086               | 17.13                     | 16.97                 |
| 39163              | Vinton, OH                | 0.123                | 90.32                     | 72.29                 |
| 39165              | Warren, OH                | -0.059               | 28.3                      | 4.78                  |
| 39167              | Washington, OH            | -0.087               | 16.84                     | 34.97                 |
| 39169              | Wayne, OH                 | -0.013               | 49.92                     | 47.9                  |
| 39171              | Williams, OH              | -0.053               | 31.14                     | 26.91                 |
| 39173              | Wood, OH                  | -0.044               | 35.78                     | 16.62                 |
| 39175              | Wyandot, OH               | -0.093               | 14.29                     | 22.74                 |
| 40001              | Adair, OK                 | 0.13                 | 91.25                     | 89.65                 |
| 40003              | Alfalfa, OK               | -0.069               | 23.56                     | 25.35                 |
| 40005              | Atoka, OK                 | 0.033                | 69.47                     | 80.76                 |
| 40007              | Beaver, OK                | 0.006                | 58.9                      | 45.54                 |
| 40009              | Beckham, OK               | 0.044                | 73.42                     | 71.18                 |

| <b>County FIPS</b> | <b>County Description</b> | <b>DOS-SVI Index</b> | <b>DOS-SVI Percentile</b> | <b>SVI Percentile</b> |
|--------------------|---------------------------|----------------------|---------------------------|-----------------------|
| 40011              | Blaine, OK                | -0.043               | 36.04                     | 66.78                 |
| 40013              | Bryan, OK                 | 0.049                | 74.94                     | 81.27                 |
| 40015              | Caddo, OK                 | 0.092                | 85.2                      | 94.59                 |
| 40017              | Canadian, OK              | 0.015                | 62.37                     | 26.21                 |
| 40019              | Carter, OK                | 0.033                | 69.37                     | 79.14                 |
| 40021              | Cherokee, OK              | 0.107                | 87.93                     | 92.71                 |
| 40023              | Choctaw, OK               | 0.074                | 81.44                     | 96.02                 |
| 40025              | Cimarron, OK              | -0.092               | 14.71                     | 44.75                 |
| 40027              | Cleveland, OK             | -0.019               | 47.53                     | 34.36                 |
| 40029              | Coal, OK                  | 0.014                | 61.8                      | 82.55                 |
| 40031              | Comanche, OK              | 0.056                | 76.95                     | 83.54                 |
| 40033              | Cotton, OK                | 0.035                | 70.26                     | 67.42                 |
| 40035              | Craig, OK                 | -0.024               | 45.02                     | 85.38                 |
| 40037              | Creek, OK                 | 0.015                | 62.5                      | 49.01                 |
| 40039              | Custer, OK                | 0.031                | 68.86                     | 75.03                 |
| 40041              | Delaware, OK              | 0.035                | 70.33                     | 76.97                 |
| 40043              | Dewey, OK                 | -0.045               | 35.34                     | 22.48                 |
| 40045              | Ellis, OK                 | -0.038               | 38.62                     | 30.19                 |
| 40047              | Garfield, OK              | -0.014               | 49.67                     | 59.08                 |
| 40049              | Garvin, OK                | -0.017               | 48.36                     | 51.15                 |
| 40051              | Grady, OK                 | -0.004               | 54.28                     | 30.8                  |
| 40053              | Grant, OK                 | -0.107               | 10.92                     | 16.34                 |
| 40055              | Greer, OK                 | -0.011               | 51.26                     | 77.42                 |
| 40057              | Harmon, OK                | -0.049               | 32.66                     | 81.08                 |
| 40059              | Harper, OK                | -0.031               | 42.18                     | 31.85                 |
| 40061              | Haskell, OK               | 0.13                 | 91.31                     | 87.36                 |
| 40063              | Hughes, OK                | 0.073                | 81.38                     | 81.15                 |
| 40065              | Jackson, OK               | 0.005                | 58.39                     | 82.26                 |
| 40067              | Jefferson, OK             | 0.017                | 63.1                      | 87.45                 |
| 40069              | Johnston, OK              | 0.061                | 78.42                     | 84.68                 |
| 40071              | Kay, OK                   | 0.021                | 65.04                     | 84.2                  |
| 40073              | Kingfisher, OK            | 0.02                 | 64.66                     | 38.06                 |
| 40075              | Kiowa, OK                 | -0.045               | 35.02                     | 65.45                 |
| 40077              | Latimer, OK               | 0.061                | 78.22                     | 89.36                 |
| 40079              | Le Flore, OK              | 0.027                | 67.37                     | 90.32                 |
| 40081              | Lincoln, OK               | 0.049                | 75.01                     | 47.87                 |
| 40083              | Logan, OK                 | 0.03                 | 68.55                     | 29.84                 |
| 40085              | Love, OK                  | 0.017                | 63.16                     | 62.93                 |
| 40087              | McClain, OK               | -0.017               | 48.33                     | 16.24                 |
| 40089              | McCurtain, OK             | 0.088                | 84.53                     | 91.37                 |
| 40091              | McIntosh, OK              | 0.087                | 84.4                      | 78.28                 |
| 40093              | Major, OK                 | -0.035               | 40.21                     | 32.04                 |
| 40095              | Marshall, OK              | -0.002               | 55.37                     | 85.45                 |
| 40097              | Mayes, OK                 | 0.05                 | 75.17                     | 75.19                 |
| 40099              | Murray, OK                | -0.02                | 46.77                     | 70.92                 |
| 40101              | Muskogee, OK              | 0.022                | 65.3                      | 93.38                 |
| 40103              | Noble, OK                 | -0.01                | 51.8                      | 33.85                 |
| 40105              | Nowata, OK                | 0.039                | 71.51                     | 58.95                 |
| 40107              | Okfuskee, OK              | 0.149                | 93.63                     | 92.87                 |
| 40109              | Oklahoma, OK              | -0.005               | 54                        | 68.18                 |
| 40111              | Okmulgee, OK              | 0.081                | 83.03                     | 86.59                 |
| 40113              | Osage, OK                 | 0.043                | 72.84                     | 62.39                 |
| 40115              | Ottawa, OK                | 0.044                | 73.48                     | 95.76                 |
| 40117              | Pawnee, OK                | 0.039                | 71.54                     | 54.24                 |
| 40119              | Payne, OK                 | 0.047                | 74.18                     | 51.31                 |



| <b>County FIPS</b> | <b>County Description</b> | <b>DOS-SVI Index</b> | <b>DOS-SVI Percentile</b> | <b>SVI Percentile</b> |
|--------------------|---------------------------|----------------------|---------------------------|-----------------------|
| 40121              | Pittsburg, OK             | 0.007                | 59.44                     | 82.64                 |
| 40123              | Pontotoc, OK              | -0.004               | 54.47                     | 65                    |
| 40125              | Pottawatomie, OK          | 0.04                 | 71.98                     | 78.15                 |
| 40127              | Pushmataha, OK            | 0.055                | 76.54                     | 78.63                 |
| 40129              | Roger Mills, OK           | 0.021                | 65.23                     | 40.03                 |
| 40131              | Rogers, OK                | 0.002                | 56.7                      | 28.34                 |
| 40133              | Seminole, OK              | 0.085                | 83.76                     | 92.9                  |
| 40135              | Sequoyah, OK              | 0.119                | 89.84                     | 91.59                 |
| 40137              | Stephens, OK              | -0.021               | 46.55                     | 60.51                 |
| 40139              | Texas, OK                 | 0.089                | 84.69                     | 82.1                  |
| 40141              | Tillman, OK               | -0.006               | 53.65                     | 87.1                  |
| 40143              | Tulsa, OK                 | -0.006               | 53.07                     | 61.59                 |
| 40145              | Wagoner, OK               | 0.038                | 71.16                     | 42.45                 |
| 40147              | Washington, OK            | -0.053               | 30.91                     | 43.82                 |
| 40149              | Washita, OK               | -0.009               | 52.09                     | 40.45                 |
| 40151              | Woods, OK                 | -0.08                | 19.29                     | 31.4                  |
| 40153              | Woodward, OK              | 0.02                 | 64.79                     | 57.45                 |
| 41001              | Baker, OR                 | 0.009                | 60.05                     | 68.54                 |
| 41003              | Benton, OR                | -0.013               | 50.3                      | 34.9                  |
| 41005              | Clackamas, OR             | -0.045               | 35.08                     | 18.95                 |
| 41007              | Clatsop, OR               | -0.052               | 31.36                     | 51.85                 |
| 41009              | Columbia, OR              | 0.004                | 58.13                     | 40.25                 |
| 41011              | Coos, OR                  | -0.017               | 48.07                     | 74.3                  |
| 41013              | Crook, OR                 | 0.024                | 66.35                     | 57.29                 |
| 41015              | Curry, OR                 | -0.114               | 9.49                      | 48.79                 |
| 41017              | Deschutes, OR             | -0.049               | 32.79                     | 16.37                 |
| 41019              | Douglas, OR               | 0.007                | 59.31                     | 72.77                 |
| 41021              | Gilliam, OR               | -0.008               | 52.53                     | 50.92                 |
| 41023              | Grant, OR                 | -0.025               | 44.63                     | 54.65                 |
| 41025              | Harney, OR                | 0.129                | 91.21                     | 71.08                 |
| 41027              | Hood River, OR            | 0.037                | 70.71                     | 54.55                 |
| 41029              | Jackson, OR               | -0.015               | 49.28                     | 73.54                 |
| 41031              | Jefferson, OR             | 0.146                | 93.19                     | 91.18                 |
| 41033              | Josephine, OR             | 0.038                | 71.38                     | 65.57                 |
| 41035              | Klamath, OR               | 0.065                | 79.31                     | 86.88                 |
| 41037              | Lake, OR                  | -0.012               | 50.4                      | 76.08                 |
| 41039              | Lane, OR                  | -0.012               | 50.59                     | 64.9                  |
| 41041              | Lincoln, OR               | -0.083               | 18.27                     | 55.22                 |
| 41043              | Linn, OR                  | 0.041                | 72.14                     | 67.9                  |
| 41045              | Malheur, OR               | 0.135                | 91.94                     | 99.65                 |
| 41047              | Marion, OR                | 0.054                | 76.09                     | 85.35                 |
| 41049              | Morrow, OR                | 0.19                 | 96.5                      | 76.43                 |
| 41051              | Multnomah, OR             | -0.012               | 50.81                     | 46.75                 |
| 41053              | Polk, OR                  | 0.017                | 63.26                     | 57.77                 |
| 41055              | Sherman, OR               | -0.14                | 4.49                      | 13.5                  |
| 41057              | Tillamook, OR             | -0.065               | 25.41                     | 65.86                 |
| 41059              | Umatilla, OR              | 0.135                | 92.01                     | 96.88                 |
| 41061              | Union, OR                 | 0.018                | 63.8                      | 67.29                 |
| 41063              | Wallowa, OR               | -0.099               | 12.51                     | 50.32                 |
| 41065              | Wasco, OR                 | -0.027               | 43.94                     | 83.89                 |
| 41067              | Washington, OR            | 0.001                | 56.54                     | 31.94                 |
| 41069              | Wheeler, OR               | -0.094               | 14.07                     | 39.01                 |
| 41071              | Yamhill, OR               | 0.024                | 66.38                     | 66.08                 |
| 42001              | Adams, PA                 | -0.072               | 22.13                     | 21.18                 |
| 42003              | Allegheny, PA             | -0.091               | 15.31                     | 25.06                 |

| <b>County FIPS</b> | <b>County Description</b> | <b>DOS-SVI Index</b> | <b>DOS-SVI Percentile</b> | <b>SVI Percentile</b> |
|--------------------|---------------------------|----------------------|---------------------------|-----------------------|
| 42005              | Armstrong, PA             | -0.052               | 31.33                     | 24.75                 |
| 42007              | Beaver, PA                | -0.095               | 13.75                     | 24.81                 |
| 42009              | Bedford, PA               | -0.049               | 32.76                     | 27.29                 |
| 42011              | Berks, PA                 | -0.035               | 40.05                     | 61.62                 |
| 42013              | Blair, PA                 | -0.081               | 18.94                     | 39.81                 |
| 42015              | Bradford, PA              | -0.045               | 34.92                     | 34.71                 |
| 42017              | Bucks, PA                 | -0.094               | 14.17                     | 8.31                  |
| 42019              | Butler, PA                | -0.074               | 21.3                      | 7.9                   |
| 42021              | Cambria, PA               | -0.063               | 26.3                      | 48.92                 |
| 42023              | Cameron, PA               | -0.16                | 2.48                      | 30.06                 |
| 42025              | Carbon, PA                | -0.039               | 38.11                     | 30.48                 |
| 42027              | Centre, PA                | -0.022               | 45.75                     | 28.92                 |
| 42029              | Chester, PA               | -0.06                | 27.7                      | 14.36                 |
| 42031              | Clarion, PA               | -0.024               | 45.05                     | 47.71                 |
| 42033              | Clearfield, PA            | -0.019               | 47.69                     | 60.54                 |
| 42035              | Clinton, PA               | -0.026               | 44.22                     | 48.6                  |
| 42037              | Columbia, PA              | -0.08                | 19.26                     | 27.68                 |
| 42039              | Crawford, PA              | -0.029               | 43.01                     | 50.64                 |
| 42041              | Cumberland, PA            | -0.096               | 13.34                     | 16.15                 |
| 42043              | Dauphin, PA               | -0.062               | 26.65                     | 49.75                 |
| 42045              | Delaware, PA              | -0.048               | 33.17                     | 41.31                 |
| 42047              | Elk, PA                   | -0.12                | 7.83                      | 11.66                 |
| 42049              | Erie, PA                  | -0.045               | 35.4                      | 61.94                 |
| 42051              | Fayette, PA               | -0.02                | 47.15                     | 62.48                 |
| 42053              | Forest, PA                | 0.03                 | 68.42                     | 71.15                 |
| 42055              | Franklin, PA              | -0.054               | 30.59                     | 33.73                 |
| 42057              | Fulton, PA                | -0.047               | 34.07                     | 22.01                 |
| 42059              | Greene, PA                | -0.04                | 37.66                     | 43.5                  |
| 42061              | Huntingdon, PA            | -0.03                | 42.53                     | 49.08                 |
| 42063              | Indiana, PA               | 0.008                | 59.73                     | 54.84                 |
| 42065              | Jefferson, PA             | -0.078               | 19.8                      | 33.12                 |
| 42067              | Juniata, PA               | -0.042               | 36.58                     | 44.84                 |
| 42069              | Lackawanna, PA            | -0.086               | 17.03                     | 52.52                 |
| 42071              | Lancaster, PA             | -0.047               | 34                        | 45.73                 |
| 42073              | Lawrence, PA              | -0.075               | 21.04                     | 46.94                 |
| 42075              | Lebanon, PA               | -0.042               | 36.45                     | 53.28                 |
| 42077              | Lehigh, PA                | -0.036               | 39.57                     | 63.5                  |
| 42079              | Luzerne, PA               | -0.074               | 21.36                     | 60.89                 |
| 42081              | Lycoming, PA              | -0.068               | 24.04                     | 42.1                  |
| 42083              | McKean, PA                | -0.035               | 40.02                     | 54.62                 |
| 42085              | Mercer, PA                | -0.062               | 26.68                     | 54.2                  |
| 42087              | Mifflin, PA               | -0.077               | 20.28                     | 47.23                 |
| 42089              | Monroe, PA                | 0.002                | 56.89                     | 30.64                 |
| 42091              | Montgomery, PA            | -0.088               | 16.71                     | 16.53                 |
| 42093              | Montour, PA               | -0.124               | 7.2                       | 31.11                 |
| 42095              | Northampton, PA           | -0.083               | 18.15                     | 28.76                 |
| 42097              | Northumberland, PA        | -0.087               | 16.87                     | 50.06                 |
| 42099              | Perry, PA                 | -0.061               | 26.87                     | 10.89                 |
| 42101              | Philadelphia, PA          | 0.065                | 79.18                     | 92.04                 |
| 42103              | Pike, PA                  | -0.069               | 23.5                      | 12.87                 |
| 42105              | Potter, PA                | -0.042               | 36.52                     | 44.17                 |
| 42107              | Schuylkill, PA            | -0.069               | 23.37                     | 45.06                 |
| 42109              | Snyder, PA                | -0.073               | 21.9                      | 22.99                 |
| 42111              | Somerset, PA              | -0.06                | 27.95                     | 42.26                 |
| 42113              | Sullivan, PA              | -0.11                | 10.35                     | 35.76                 |

| <b>County FIPS</b> | <b>County Description</b> | <b>DOS-SVI Index</b> | <b>DOS-SVI Percentile</b> | <b>SVI Percentile</b> |
|--------------------|---------------------------|----------------------|---------------------------|-----------------------|
| 42115              | Susquehanna, PA           | -0.067               | 24.45                     | 20.64                 |
| 42117              | Tioga, PA                 | -0.041               | 37.41                     | 31.53                 |
| 42119              | Union, PA                 | -0.041               | 37.12                     | 36.05                 |
| 42121              | Venango, PA               | -0.044               | 35.72                     | 42.29                 |
| 42123              | Warren, PA                | -0.084               | 18.05                     | 21.34                 |
| 42125              | Washington, PA            | -0.08                | 19.2                      | 16.94                 |
| 42127              | Wayne, PA                 | -0.079               | 19.42                     | 26.31                 |
| 42129              | Westmoreland, PA          | -0.118               | 8.31                      | 13.79                 |
| 42131              | Wyoming, PA               | -0.057               | 29.35                     | 11.21                 |
| 42133              | York, PA                  | -0.054               | 30.47                     | 32.9                  |
| 44001              | Bristol, RI               | -0.138               | 4.78                      | 12.36                 |
| 44003              | Kent, RI                  | -0.09                | 15.95                     | 15.19                 |
| 44005              | Newport, RI               | -0.135               | 5.09                      | 17.9                  |
| 44007              | Providence, RI            | -0.039               | 38.01                     | 75.92                 |
| 44009              | Washington, RI            | -0.085               | 17.51                     | 8.89                  |
| 45001              | Abbeville, SC             | 0.031                | 69.05                     | 85.64                 |
| 45003              | Aiken, SC                 | 0.025                | 67.05                     | 66.66                 |
| 45005              | Allendale, SC             | 0.242                | 97.99                     | 99.3                  |
| 45007              | Anderson, SC              | 0.01                 | 60.36                     | 70.1                  |
| 45009              | Bamberg, SC               | 0.013                | 61.73                     | 95.16                 |
| 45011              | Barnwell, SC              | 0.111                | 88.7                      | 99.04                 |
| 45013              | Beaufort, SC              | -0.108               | 10.6                      | 40.06                 |
| 45015              | Berkeley, SC              | 0.019                | 64.28                     | 51.46                 |
| 45017              | Calhoun, SC               | 0.028                | 67.88                     | 56.27                 |
| 45019              | Charleston, SC            | -0.062               | 26.55                     | 31.56                 |
| 45021              | Cherokee, SC              | 0.053                | 76                        | 69.78                 |
| 45023              | Chester, SC               | 0.061                | 78.13                     | 73.63                 |
| 45025              | Chesterfield, SC          | 0.17                 | 94.97                     | 94.87                 |
| 45027              | Clarendon, SC             | 0.155                | 94.02                     | 97.93                 |
| 45029              | Colleton, SC              | 0.097                | 86.15                     | 80                    |
| 45031              | Darlington, SC            | 0.149                | 93.47                     | 92.68                 |
| 45033              | Dillon, SC                | 0.167                | 94.87                     | 96.82                 |
| 45035              | Dorchester, SC            | 0.021                | 64.92                     | 41.88                 |
| 45037              | Edgefield, SC             | 0.012                | 61.16                     | 84.84                 |
| 45039              | Fairfield, SC             | 0.052                | 75.71                     | 74.84                 |
| 45041              | Florence, SC              | 0.064                | 78.89                     | 89.87                 |
| 45043              | Georgetown, SC            | -0.045               | 35.24                     | 67.71                 |
| 45045              | Greenville, SC            | -0.02                | 46.7                      | 50.38                 |
| 45047              | Greenwood, SC             | 0.025                | 67.11                     | 93.44                 |
| 45049              | Hampton, SC               | 0.131                | 91.53                     | 80.32                 |
| 45051              | Horry, SC                 | -0.07                | 23.08                     | 61.02                 |
| 45053              | Jasper, SC                | 0.103                | 87.2                      | 94.49                 |
| 45055              | Kershaw, SC               | 0.021                | 65.17                     | 49.59                 |
| 45057              | Lancaster, SC             | -0.013               | 50.27                     | 51.21                 |
| 45059              | Laurens, SC               | 0.096                | 85.8                      | 91.72                 |
| 45061              | Lee, SC                   | 0.137                | 92.17                     | 92.1                  |
| 45063              | Lexington, SC             | 0.019                | 64.34                     | 44.2                  |
| 45065              | McCormick, SC             | 0.004                | 58.1                      | 73.73                 |
| 45067              | Marion, SC                | 0.12                 | 90.03                     | 92.93                 |
| 45069              | Marlboro, SC              | 0.19                 | 96.43                     | 98.69                 |
| 45071              | Newberry, SC              | 0.044                | 73.38                     | 92.32                 |
| 45073              | Oconee, SC                | -0.021               | 46.23                     | 72.93                 |
| 45075              | Orangeburg, SC            | 0.113                | 89.11                     | 92.29                 |
| 45077              | Pickens, SC               | 0.007                | 59.34                     | 59.9                  |
| 45079              | Richland, SC              | 0.004                | 57.72                     | 63.09                 |

| <b>County FIPS</b> | <b>County Description</b> | <b>DOS-SVI Index</b> | <b>DOS-SVI Percentile</b> | <b>SVI Percentile</b> |
|--------------------|---------------------------|----------------------|---------------------------|-----------------------|
| 45081              | Saluda, SC                | 0.021                | 64.98                     | 79.49                 |
| 45083              | Spartanburg, SC           | 0.017                | 63.29                     | 76.18                 |
| 45085              | Sumter, SC                | 0.138                | 92.33                     | 97.32                 |
| 45087              | Union, SC                 | 0.022                | 65.52                     | 86.78                 |
| 45089              | Williamsburg, SC          | 0.105                | 87.55                     | 97.04                 |
| 45091              | York, SC                  | 0.004                | 58.17                     | 36.62                 |
| 46003              | Aurora, SD                | -0.1                 | 12.38                     | 27.26                 |
| 46005              | Beadle, SD                | -0.036               | 39.67                     | 65.06                 |
| 46007              | Bennett, SD               | 0.384                | 99.33                     | 79.27                 |
| 46009              | Bon Homme, SD             | -0.117               | 8.72                      | 23.82                 |
| 46011              | Brookings, SD             | -0.023               | 45.53                     | 15.61                 |
| 46013              | Brown, SD                 | -0.093               | 14.55                     | 32.87                 |
| 46015              | Brule, SD                 | -0.079               | 19.55                     | 57.13                 |
| 46017              | Buffalo, SD               | 0.529                | 99.65                     | 97.1                  |
| 46019              | Butte, SD                 | -0.041               | 37.09                     | 36.27                 |
| 46021              | Campbell, SD              | -0.133               | 5.44                      | 0.64                  |
| 46023              | Charles Mix, SD           | 0.08                 | 82.78                     | 73.89                 |
| 46025              | Clark, SD                 | -0.057               | 28.97                     | 17.1                  |
| 46027              | Clay, SD                  | 0.001                | 56.64                     | 24.68                 |
| 46029              | Codington, SD             | -0.061               | 27                        | 24.49                 |
| 46031              | Corson, SD                | 0.611                | 99.78                     | 83.95                 |
| 46033              | Custer, SD                | -0.14                | 4.55                      | 22.8                  |
| 46035              | Davison, SD               | -0.095               | 13.85                     | 23.38                 |
| 46037              | Day, SD                   | -0.172               | 1.88                      | 18.5                  |
| 46039              | Deuel, SD                 | -0.109               | 10.44                     | 8.22                  |
| 46041              | Dewey, SD                 | 0.598                | 99.75                     | 88.31                 |
| 46043              | Douglas, SD               | -0.105               | 11.33                     | 15.03                 |
| 46045              | Edmunds, SD               | -0.083               | 18.46                     | 3.41                  |
| 46047              | Fall River, SD            | -0.155               | 2.96                      | 41.72                 |
| 46049              | Faulk, SD                 | -0.159               | 2.55                      | 7.77                  |
| 46051              | Grant, SD                 | -0.155               | 2.9                       | 5.51                  |
| 46053              | Gregory, SD               | -0.146               | 3.82                      | 28.47                 |
| 46055              | Haakon, SD                | -0.093               | 14.49                     | 36.24                 |
| 46057              | Hamlin, SD                | -0.016               | 48.87                     | 15.86                 |
| 46059              | Hand, SD                  | -0.186               | 1.08                      | 3.09                  |
| 46061              | Hanson, SD                | -0.043               | 36.1                      | 0.13                  |
| 46063              | Harding, SD               | -0.022               | 45.72                     | 8.28                  |
| 46065              | Hughes, SD                | -0.037               | 39.32                     | 40.61                 |
| 46067              | Hutchinson, SD            | -0.079               | 19.48                     | 24.87                 |
| 46069              | Hyde, SD                  | -0.12                | 7.77                      | 9.43                  |
| 46071              | Jackson, SD               | 0.348                | 99.11                     | 96.66                 |
| 46073              | Jerauld, SD               | -0.188               | 1.05                      | 5.06                  |
| 46075              | Jones, SD                 | -0.118               | 8.37                      | 0.51                  |
| 46077              | Kingsbury, SD             | -0.168               | 1.94                      | 2.23                  |
| 46079              | Lake, SD                  | -0.048               | 33.49                     | 19.65                 |
| 46081              | Lawrence, SD              | -0.116               | 8.82                      | 26.18                 |
| 46083              | Lincoln, SD               | -0.055               | 30.25                     | 2.01                  |
| 46085              | Lyman, SD                 | 0.128                | 91.02                     | 71.37                 |
| 46087              | McCook, SD                | -0.04                | 37.6                      | 22.29                 |
| 46089              | McPherson, SD             | -0.074               | 21.2                      | 28.89                 |
| 46091              | Marshall, SD              | -0.087               | 16.97                     | 21.31                 |
| 46093              | Meade, SD                 | -0.05                | 32.63                     | 8.92                  |
| 46095              | Mellette, SD              | 0.305                | 98.82                     | 91.56                 |
| 46097              | Miner, SD                 | -0.059               | 28.08                     | 10.57                 |
| 46099              | Minnehaha, SD             | -0.049               | 32.7                      | 35.89                 |

| <b>County FIPS</b> | <b>County Description</b> | <b>DOS-SVI Index</b> | <b>DOS-SVI Percentile</b> | <b>SVI Percentile</b> |
|--------------------|---------------------------|----------------------|---------------------------|-----------------------|
| 46101              | Moody, SD                 | -0.034               | 40.85                     | 39.08                 |
| 46102              | Oglala Lakota, SD         | 1.052                | 99.97                     | 99.43                 |
| 46103              | Pennington, SD            | -0.044               | 35.56                     | 41.62                 |
| 46105              | Perkins, SD               | -0.086               | 17.19                     | 10.96                 |
| 46107              | Potter, SD                | -0.146               | 3.85                      | 5.16                  |
| 46109              | Roberts, SD               | -0.009               | 51.93                     | 71.78                 |
| 46111              | Sanborn, SD               | -0.097               | 13.28                     | 3.85                  |
| 46115              | Spink, SD                 | -0.109               | 10.51                     | 17.68                 |
| 46117              | Stanley, SD               | -0.073               | 21.68                     | 10.99                 |
| 46119              | Sully, SD                 | -0.151               | 3.22                      | 0.73                  |
| 46121              | Todd, SD                  | 0.497                | 99.55                     | 95.64                 |
| 46123              | Tripp, SD                 | -0.097               | 13.12                     | 34.11                 |
| 46125              | Turner, SD                | -0.119               | 8.05                      | 10.8                  |
| 46127              | Union, SD                 | -0.123               | 7.35                      | 2.74                  |
| 46129              | Walworth, SD              | -0.04                | 37.5                      | 39.39                 |
| 46135              | Yankton, SD               | -0.115               | 9.3                       | 31.59                 |
| 46137              | Ziebach, SD               | 0.678                | 99.81                     | 95.38                 |
| 47001              | Anderson, TN              | -0.038               | 38.3                      | 60.64                 |
| 47003              | Bedford, TN               | 0.048                | 74.72                     | 77.58                 |
| 47005              | Benton, TN                | 0.01                 | 60.52                     | 70.29                 |
| 47007              | Bledsoe, TN               | 0.091                | 85.04                     | 81.59                 |
| 47009              | Blount, TN                | -0.046               | 34.7                      | 24.52                 |
| 47011              | Bradley, TN               | 0.006                | 59.12                     | 69.14                 |
| 47013              | Campbell, TN              | 0.003                | 57.27                     | 73.38                 |
| 47015              | Cannon, TN                | 0.002                | 56.67                     | 37.04                 |
| 47017              | Carroll, TN               | 0.002                | 56.83                     | 74.43                 |
| 47019              | Carter, TN                | -0.041               | 36.9                      | 61.53                 |
| 47021              | Cheatham, TN              | -0.011               | 51.23                     | 23.69                 |
| 47023              | Chester, TN               | 0.073                | 81.31                     | 64.36                 |
| 47025              | Claiborne, TN             | 0.047                | 74.05                     | 71.02                 |
| 47027              | Clay, TN                  | -0.032               | 41.52                     | 59.39                 |
| 47029              | Cocke, TN                 | 0.061                | 78.25                     | 68.57                 |
| 47031              | Coffee, TN                | 0.015                | 62.46                     | 49.14                 |
| 47033              | Crockett, TN              | 0.023                | 65.74                     | 78.12                 |
| 47035              | Cumberland, TN            | -0.091               | 15.19                     | 53.73                 |
| 47037              | Davidson, TN              | -0.038               | 38.43                     | 53.63                 |
| 47039              | Decatur, TN               | 0.018                | 63.99                     | 50.86                 |
| 47041              | DeKalb, TN                | 0.006                | 58.8                      | 43.06                 |
| 47043              | Dickson, TN               | 0.004                | 57.94                     | 42.9                  |
| 47045              | Dyer, TN                  | 0.019                | 64.22                     | 75.96                 |
| 47047              | Fayette, TN               | -0.027               | 43.78                     | 25.54                 |
| 47049              | Fentress, TN              | 0.047                | 74.02                     | 63.73                 |
| 47051              | Franklin, TN              | -0.053               | 30.88                     | 37.64                 |
| 47053              | Gibson, TN                | 0                    | 55.91                     | 73.5                  |
| 47055              | Giles, TN                 | -0.004               | 54.31                     | 60.32                 |
| 47057              | Grainger, TN              | 0.063                | 78.67                     | 59.3                  |
| 47059              | Greene, TN                | -0.007               | 52.82                     | 54.46                 |
| 47061              | Grundy, TN                | 0.082                | 83.29                     | 86.85                 |
| 47063              | Hamblen, TN               | 0.045                | 73.67                     | 81.46                 |
| 47065              | Hamilton, TN              | -0.05                | 32.12                     | 41.37                 |
| 47067              | Hancock, TN               | 0.047                | 74.37                     | 76.66                 |
| 47069              | Hardeman, TN              | 0.144                | 92.81                     | 86.72                 |
| 47071              | Hardin, TN                | 0                    | 55.97                     | 70.64                 |
| 47073              | Hawkins, TN               | 0.01                 | 60.46                     | 70.8                  |
| 47075              | Haywood, TN               | 0.019                | 64.44                     | 87.17                 |

| <b>County FIPS</b> | <b>County Description</b> | <b>DOS-SVI Index</b> | <b>DOS-SVI Percentile</b> | <b>SVI Percentile</b> |
|--------------------|---------------------------|----------------------|---------------------------|-----------------------|
| 47077              | Henderson, TN             | 0.085                | 83.89                     | 69.81                 |
| 47079              | Henry, TN                 | -0.016               | 49.03                     | 63.47                 |
| 47081              | Hickman, TN               | 0.023                | 65.65                     | 56.62                 |
| 47083              | Houston, TN               | 0.005                | 58.45                     | 55.51                 |
| 47085              | Humphreys, TN             | 0.02                 | 64.5                      | 36.88                 |
| 47087              | Jackson, TN               | 0.038                | 71.31                     | 60                    |
| 47089              | Jefferson, TN             | 0.016                | 62.94                     | 56.08                 |
| 47091              | Johnson, TN               | -0.047               | 33.84                     | 56.53                 |
| 47093              | Knox, TN                  | -0.054               | 30.66                     | 30.35                 |
| 47095              | Lake, TN                  | 0.056                | 76.76                     | 91.85                 |
| 47097              | Lauderdale, TN            | 0.081                | 82.94                     | 96.72                 |
| 47099              | Lawrence, TN              | 0.08                 | 82.74                     | 83.18                 |
| 47101              | Lewis, TN                 | -0.03                | 42.47                     | 63.63                 |
| 47103              | Lincoln, TN               | -0.016               | 48.77                     | 67.77                 |
| 47105              | Loudon, TN                | -0.069               | 23.21                     | 38.63                 |
| 47107              | McMinn, TN                | 0.016                | 63.07                     | 65.51                 |
| 47109              | McNairy, TN               | 0.119                | 90                        | 71.72                 |
| 47111              | Macon, TN                 | 0.008                | 59.85                     | 69.27                 |
| 47113              | Madison, TN               | -0.031               | 41.96                     | 71.24                 |
| 47115              | Marion, TN                | -0.013               | 49.86                     | 50.61                 |
| 47117              | Marshall, TN              | 0.013                | 61.51                     | 60.99                 |
| 47119              | Maury, TN                 | -0.001               | 55.72                     | 39.49                 |
| 47121              | Meigs, TN                 | 0.101                | 86.69                     | 49.33                 |
| 47123              | Monroe, TN                | 0.1                  | 86.56                     | 64.78                 |
| 47125              | Montgomery, TN            | 0.067                | 79.85                     | 51.72                 |
| 47127              | Moore, TN                 | -0.047               | 34.13                     | 9.14                  |
| 47129              | Morgan, TN                | 0.098                | 86.44                     | 74.94                 |
| 47131              | Obion, TN                 | -0.013               | 49.79                     | 76.94                 |
| 47133              | Overton, TN               | -0.017               | 48.2                      | 45.76                 |
| 47135              | Perry, TN                 | 0.107                | 88.03                     | 67.99                 |
| 47137              | Pickett, TN               | -0.047               | 33.72                     | 41.53                 |
| 47139              | Polk, TN                  | 0.047                | 74.4                      | 49.04                 |
| 47141              | Putnam, TN                | -0.028               | 43.62                     | 61.82                 |
| 47143              | Rhea, TN                  | 0.056                | 76.82                     | 82.07                 |
| 47145              | Roane, TN                 | -0.001               | 55.65                     | 38.44                 |
| 47147              | Robertson, TN             | 0.025                | 67.08                     | 42.87                 |
| 47149              | Rutherford, TN            | 0.008                | 59.79                     | 32.68                 |
| 47151              | Scott, TN                 | 0.065                | 79.24                     | 76.37                 |
| 47153              | Sequatchie, TN            | 0.028                | 67.78                     | 57.2                  |
| 47155              | Sevier, TN                | -0.011               | 51.03                     | 61.11                 |
| 47157              | Shelby, TN                | 0.029                | 68.26                     | 78.47                 |
| 47159              | Smith, TN                 | -0.017               | 48.27                     | 26.08                 |
| 47161              | Stewart, TN               | 0.029                | 68                        | 40.86                 |
| 47163              | Sullivan, TN              | -0.047               | 33.68                     | 54.11                 |
| 47165              | Sumner, TN                | -0.053               | 30.98                     | 20.57                 |
| 47167              | Tipton, TN                | 0.05                 | 75.2                      | 45                    |
| 47169              | Trousdale, TN             | 0.063                | 78.86                     | 52.2                  |
| 47171              | Unicoi, TN                | -0.012               | 50.65                     | 79.81                 |
| 47173              | Union, TN                 | 0.121                | 90.1                      | 66.72                 |
| 47175              | Van Buren, TN             | 0.127                | 90.89                     | 60.25                 |
| 47177              | Warren, TN                | 0.006                | 58.87                     | 83.22                 |
| 47179              | Washington, TN            | -0.063               | 26.39                     | 45.89                 |
| 47181              | Wayne, TN                 | 0.071                | 80.61                     | 76.24                 |
| 47183              | Weakley, TN               | -0.012               | 50.33                     | 65.83                 |
| 47185              | White, TN                 | 0.046                | 73.93                     | 59.84                 |

| <b>County FIPS</b> | <b>County Description</b> | <b>DOS-SVI Index</b> | <b>DOS-SVI Percentile</b> | <b>SVI Percentile</b> |
|--------------------|---------------------------|----------------------|---------------------------|-----------------------|
| 47187              | Williamson, TN            | -0.034               | 40.56                     | 2.1                   |
| 47189              | Wilson, TN                | -0.046               | 34.48                     | 14.65                 |
| 48001              | Anderson, TX              | 0.054                | 76.15                     | 79.46                 |
| 48003              | Andrews, TX               | 0.195                | 96.66                     | 47.36                 |
| 48005              | Angelina, TX              | 0.117                | 89.56                     | 97.71                 |
| 48007              | Aransas, TX               | -0.014               | 49.7                      | 80.19                 |
| 48009              | Archer, TX                | -0.074               | 21.39                     | 8.98                  |
| 48011              | Armstrong, TX             | -0.11                | 10.25                     | 15.99                 |
| 48013              | Atascosa, TX              | 0.226                | 97.61                     | 84.97                 |
| 48015              | Austin, TX                | 0.044                | 73.13                     | 49.36                 |
| 48017              | Bailey, TX                | 0.057                | 77.14                     | 80.03                 |
| 48019              | Bandera, TX               | -0.035               | 40.31                     | 50.76                 |
| 48021              | Bastrop, TX               | 0.146                | 93.22                     | 74.59                 |
| 48023              | Baylor, TX                | -0.128               | 6.27                      | 15.54                 |
| 48025              | Bee, TX                   | 0.205                | 97.04                     | 96.94                 |
| 48027              | Bell, TX                  | 0.105                | 87.71                     | 80.51                 |
| 48029              | Bexar, TX                 | 0.042                | 72.78                     | 82.58                 |
| 48031              | Blanco, TX                | -0.034               | 40.97                     | 27.83                 |
| 48033              | Borden, TX                | -0.116               | 8.95                      | 6.21                  |
| 48035              | Bosque, TX                | -0.034               | 40.59                     | 61.75                 |
| 48037              | Bowie, TX                 | 0.042                | 72.59                     | 85.29                 |
| 48039              | Brazoria, TX              | 0.055                | 76.6                      | 51.34                 |
| 48041              | Brazos, TX                | 0.029                | 67.97                     | 65.32                 |
| 48043              | Brewster, TX              | -0.025               | 44.76                     | 65.73                 |
| 48045              | Briscoe, TX               | -0.081               | 18.78                     | 45.64                 |
| 48047              | Brooks, TX                | 0.213                | 97.26                     | 100                   |
| 48049              | Brown, TX                 | -0.026               | 44.25                     | 62.77                 |
| 48051              | Burleson, TX              | 0.097                | 86.12                     | 60.8                  |
| 48053              | Burnet, TX                | -0.044               | 35.47                     | 52.99                 |
| 48055              | Caldwell, TX              | 0.101                | 86.82                     | 87.32                 |
| 48057              | Calhoun, TX               | 0.146                | 93.09                     | 86.18                 |
| 48059              | Callahan, TX              | -0.006               | 53.33                     | 29.68                 |
| 48061              | Cameron, TX               | 0.207                | 97.07                     | 97.58                 |
| 48063              | Camp, TX                  | 0.093                | 85.48                     | 90.19                 |
| 48065              | Carson, TX                | -0.088               | 16.65                     | 3.38                  |
| 48067              | Cass, TX                  | 0.075                | 81.89                     | 78.41                 |
| 48069              | Castro, TX                | 0.036                | 70.39                     | 77.74                 |
| 48071              | Chambers, TX              | 0.09                 | 84.78                     | 41.08                 |
| 48073              | Cherokee, TX              | 0.111                | 88.76                     | 91.91                 |
| 48075              | Childress, TX             | 0.097                | 86.28                     | 75                    |
| 48077              | Clay, TX                  | 0.012                | 61.38                     | 31.82                 |
| 48079              | Cochran, TX               | 0.128                | 90.99                     | 86.08                 |
| 48081              | Coke, TX                  | -0.093               | 14.39                     | 62.04                 |
| 48083              | Coleman, TX               | -0.101               | 12.22                     | 41.85                 |
| 48085              | Collin, TX                | -0.016               | 48.71                     | 15.06                 |
| 48087              | Collingsworth, TX         | 0.068                | 80.17                     | 88.76                 |
| 48089              | Colorado, TX              | 0.033                | 69.5                      | 68.47                 |
| 48091              | Comal, TX                 | -0.048               | 33.52                     | 23.79                 |
| 48093              | Comanche, TX              | -0.056               | 29.58                     | 72.64                 |
| 48095              | Concho, TX                | -0.125               | 6.91                      | 42.83                 |
| 48097              | Cooke, TX                 | 0.011                | 60.74                     | 62.26                 |
| 48099              | Coryell, TX               | 0.134                | 91.88                     | 78.09                 |
| 48101              | Cottle, TX                | 0.085                | 83.83                     | 93.63                 |
| 48103              | Crane, TX                 | 0.095                | 85.64                     | 47.39                 |
| 48105              | Crockett, TX              | -0.024               | 44.95                     | 68.92                 |

| <b>County FIPS</b> | <b>County Description</b> | <b>DOS-SVI Index</b> | <b>DOS-SVI Percentile</b> | <b>SVI Percentile</b> |
|--------------------|---------------------------|----------------------|---------------------------|-----------------------|
| 48107              | Crosby, TX                | 0.126                | 90.67                     | 93.95                 |
| 48109              | Culberson, TX             | 0.077                | 82.36                     | 99.71                 |
| 48111              | Dallam, TX                | 0.053                | 75.8                      | 55.03                 |
| 48113              | Dallas, TX                | 0.057                | 77.2                      | 75.38                 |
| 48115              | Dawson, TX                | 0.059                | 77.59                     | 94.75                 |
| 48117              | Deaf Smith, TX            | 0.065                | 79.34                     | 84.11                 |
| 48119              | Delta, TX                 | -0.006               | 53.3                      | 57.04                 |
| 48121              | Denton, TX                | -0.004               | 54.66                     | 22.1                  |
| 48123              | DeWitt, TX                | 0.055                | 76.57                     | 82.29                 |
| 48125              | Dickens, TX               | 0.175                | 95.51                     | 87.96                 |
| 48127              | Dimmit, TX                | 0.353                | 99.2                      | 99.97                 |
| 48129              | Donley, TX                | -0.07                | 23.18                     | 45.25                 |
| 48131              | Duval, TX                 | 0.175                | 95.45                     | 99.94                 |
| 48133              | Eastland, TX              | 0.001                | 56.16                     | 80.67                 |
| 48135              | Ector, TX                 | 0.138                | 92.39                     | 79.24                 |
| 48137              | Edwards, TX               | -0.058               | 28.43                     | 43.85                 |
| 48139              | Ellis, TX                 | 0.029                | 68.13                     | 39.24                 |
| 48141              | El Paso, TX               | 0.08                 | 82.84                     | 95.35                 |
| 48143              | Erath, TX                 | 0.008                | 59.69                     | 62.52                 |
| 48145              | Falls, TX                 | 0.104                | 87.42                     | 97.99                 |
| 48147              | Fannin, TX                | -0.003               | 54.98                     | 57.58                 |
| 48149              | Fayette, TX               | -0.116               | 8.85                      | 43.63                 |
| 48151              | Fisher, TX                | -0.03                | 42.76                     | 43.12                 |
| 48153              | Floyd, TX                 | 0.086                | 84.02                     | 82.99                 |
| 48155              | Foard, TX                 | -0.016               | 48.39                     | 47.83                 |
| 48157              | Fort Bend, TX             | 0.051                | 75.49                     | 28.73                 |
| 48159              | Franklin, TX              | 0.033                | 69.53                     | 52.77                 |
| 48161              | Freestone, TX             | 0.044                | 73.19                     | 84.3                  |
| 48163              | Frio, TX                  | 0.156                | 94.11                     | 98.66                 |
| 48165              | Gaines, TX                | 0.214                | 97.36                     | 68.25                 |
| 48167              | Galveston, TX             | 0.019                | 64.41                     | 58.5                  |
| 48169              | Garza, TX                 | -0.012               | 50.46                     | 72.13                 |
| 48171              | Gillespie, TX             | -0.089               | 16.36                     | 35.73                 |
| 48173              | Glasscock, TX             | -0.021               | 46.04                     | 17.61                 |
| 48175              | Goliad, TX                | -0.004               | 54.57                     | 58.15                 |
| 48177              | Gonzales, TX              | 0.161                | 94.56                     | 89.59                 |
| 48179              | Gray, TX                  | 0.045                | 73.58                     | 84.46                 |
| 48181              | Grayson, TX               | 0                    | 55.94                     | 65.92                 |
| 48183              | Gregg, TX                 | 0.011                | 60.78                     | 88.25                 |
| 48185              | Grimes, TX                | 0.057                | 77.24                     | 86.02                 |
| 48187              | Guadalupe, TX             | 0.016                | 62.69                     | 43.44                 |
| 48189              | Hale, TX                  | 0.128                | 91.05                     | 93.12                 |
| 48191              | Hall, TX                  | 0.029                | 68.1                      | 95                    |
| 48193              | Hamilton, TX              | -0.14                | 4.65                      | 60.83                 |
| 48195              | Hansford, TX              | 0.033                | 69.44                     | 76.15                 |
| 48197              | Hardeman, TX              | 0.024                | 66.32                     | 72.8                  |
| 48199              | Hardin, TX                | 0.018                | 63.55                     | 25.32                 |
| 48201              | Harris, TX                | 0.059                | 77.68                     | 72.36                 |
| 48203              | Harrison, TX              | 0.076                | 82.17                     | 73.06                 |
| 48205              | Hartley, TX               | 0.036                | 70.49                     | 53.44                 |
| 48207              | Haskell, TX               | 0.037                | 70.77                     | 97.55                 |
| 48209              | Hays, TX                  | 0.064                | 79.08                     | 49.24                 |
| 48211              | Hemphill, TX              | 0.138                | 92.36                     | 74.27                 |
| 48213              | Henderson, TX             | 0.011                | 61.03                     | 72.01                 |
| 48215              | Hidalgo, TX               | 0.28                 | 98.6                      | 97.8                  |



| <b>County FIPS</b> | <b>County Description</b> | <b>DOS-SVI Index</b> | <b>DOS-SVI Percentile</b> | <b>SVI Percentile</b> |
|--------------------|---------------------------|----------------------|---------------------------|-----------------------|
| 48217              | Hill, TX                  | 0.088                | 84.5                      | 87.07                 |
| 48219              | Hockley, TX               | 0.147                | 93.35                     | 90.25                 |
| 48221              | Hood, TX                  | -0.085               | 17.57                     | 26.02                 |
| 48223              | Hopkins, TX               | 0.021                | 65.2                      | 70.67                 |
| 48225              | Houston, TX               | -0.031               | 42.25                     | 91.31                 |
| 48227              | Howard, TX                | 0.044                | 73.29                     | 91.53                 |
| 48229              | Hudspeth, TX              | 0.166                | 94.81                     | 98.25                 |
| 48231              | Hunt, TX                  | 0.075                | 81.98                     | 83.41                 |
| 48233              | Hutchinson, TX            | 0.024                | 66.41                     | 66.31                 |
| 48235              | Irion, TX                 | 0.034                | 69.72                     | 20.13                 |
| 48237              | Jack, TX                  | 0.006                | 59.09                     | 65.38                 |
| 48239              | Jackson, TX               | 0.087                | 84.43                     | 67.74                 |
| 48241              | Jasper, TX                | 0.097                | 85.99                     | 82.39                 |
| 48243              | Jeff Davis, TX            | -0.097               | 13.15                     | 36.11                 |
| 48245              | Jefferson, TX             | -0.01                | 51.73                     | 85.67                 |
| 48247              | Jim Hogg, TX              | 0.223                | 97.55                     | 99.17                 |
| 48249              | Jim Wells, TX             | 0.115                | 89.4                      | 92.26                 |
| 48251              | Johnson, TX               | 0.054                | 76.34                     | 50.73                 |
| 48253              | Jones, TX                 | 0.017                | 63.39                     | 63.28                 |
| 48255              | Karnes, TX                | 0.049                | 74.82                     | 84.24                 |
| 48257              | Kaufman, TX               | 0.1                  | 86.53                     | 56.91                 |
| 48259              | Kendall, TX               | -0.066               | 24.96                     | 22.83                 |
| 48261              | Kenedy, TX                | -0.083               | 18.43                     | 73.28                 |
| 48263              | Kent, TX                  | -0.129               | 6.08                      | 44.27                 |
| 48265              | Kerr, TX                  | -0.077               | 20.09                     | 69.59                 |
| 48267              | Kimble, TX                | -0.15                | 3.31                      | 58.85                 |
| 48269              | King, TX                  | 0.028                | 67.84                     | 19.55                 |
| 48271              | Kinney, TX                | 0.004                | 58.29                     | 85.61                 |
| 48273              | Kleberg, TX               | 0.171                | 95.06                     | 98.34                 |
| 48275              | Knox, TX                  | 0.013                | 61.45                     | 79.62                 |
| 48277              | Lamar, TX                 | -0.024               | 45.18                     | 83.57                 |
| 48279              | Lamb, TX                  | -0.032               | 41.58                     | 89.75                 |
| 48281              | Lampasas, TX              | 0.028                | 67.91                     | 54.43                 |
| 48283              | La Salle, TX              | 0.129                | 91.15                     | 81.91                 |
| 48285              | Lavaca, TX                | 0.022                | 65.33                     | 68.79                 |
| 48287              | Lee, TX                   | 0.003                | 57.24                     | 67.52                 |
| 48289              | Leon, TX                  | 0.023                | 65.87                     | 61.56                 |
| 48291              | Liberty, TX               | 0.173                | 95.22                     | 94.27                 |
| 48293              | Limestone, TX             | 0.119                | 89.91                     | 95.32                 |
| 48295              | Lipscomb, TX              | 0.049                | 74.91                     | 46.05                 |
| 48297              | Live Oak, TX              | -0.009               | 52.34                     | 69.17                 |
| 48299              | Llano, TX                 | -0.103               | 11.75                     | 46.66                 |
| 48301              | Loving, TX                | 0.351                | 99.17                     | 75.73                 |
| 48303              | Lubbock, TX               | 0.004                | 58.23                     | 74.97                 |
| 48305              | Lynn, TX                  | 0.079                | 82.52                     | 89.08                 |
| 48307              | McCulloch, TX             | -0.112               | 9.84                      | 73.95                 |
| 48309              | McLennan, TX              | -0.005               | 54.12                     | 84.36                 |
| 48311              | McMullen, TX              | 0.41                 | 99.36                     | 76.31                 |
| 48313              | Madison, TX               | 0.112                | 88.89                     | 83.76                 |
| 48315              | Marion, TX                | 0.112                | 88.83                     | 68.85                 |
| 48317              | Martin, TX                | 0.126                | 90.7                      | 42.39                 |
| 48319              | Mason, TX                 | -0.092               | 15.06                     | 35.7                  |
| 48321              | Matagorda, TX             | 0.101                | 86.76                     | 90.67                 |
| 48323              | Maverick, TX              | 0.283                | 98.63                     | 97.42                 |
| 48325              | Medina, TX                | 0.031                | 68.99                     | 66.97                 |

| <b>County FIPS</b> | <b>County Description</b> | <b>DOS-SVI Index</b> | <b>DOS-SVI Percentile</b> | <b>SVI Percentile</b> |
|--------------------|---------------------------|----------------------|---------------------------|-----------------------|
| 48327              | Menard, TX                | -0.143               | 4.23                      | 58.54                 |
| 48329              | Midland, TX               | 0.067                | 79.69                     | 47.48                 |
| 48331              | Milam, TX                 | 0.027                | 67.4                      | 76.27                 |
| 48333              | Mills, TX                 | -0.156               | 2.77                      | 76.88                 |
| 48335              | Mitchell, TX              | 0.127                | 90.86                     | 62.13                 |
| 48337              | Montague, TX              | -0.013               | 49.73                     | 58.41                 |
| 48339              | Montgomery, TX            | 0.037                | 70.84                     | 39.14                 |
| 48341              | Moore, TX                 | 0.187                | 96.15                     | 69.9                  |
| 48343              | Morris, TX                | 0.065                | 79.21                     | 72.99                 |
| 48345              | Motley, TX                | 0.002                | 56.73                     | 70.03                 |
| 48347              | Nacogdoches, TX           | 0.124                | 90.42                     | 98.22                 |
| 48349              | Navarro, TX               | 0.097                | 86.09                     | 96.62                 |
| 48351              | Newton, TX                | 0.065                | 79.15                     | 72.07                 |
| 48353              | Nolan, TX                 | 0.099                | 86.5                      | 88.66                 |
| 48355              | Nueces, TX                | 0.056                | 76.89                     | 83.63                 |
| 48357              | Ochiltree, TX             | 0.179                | 95.73                     | 57.87                 |
| 48359              | Oldham, TX                | 0.161                | 94.46                     | 43.22                 |
| 48361              | Orange, TX                | 0.034                | 69.69                     | 58.12                 |
| 48363              | Palo Pinto, TX            | 0.074                | 81.47                     | 87.99                 |
| 48365              | Panola, TX                | 0.049                | 74.85                     | 69.52                 |
| 48367              | Parker, TX                | 0.045                | 73.54                     | 25.61                 |
| 48369              | Parmer, TX                | 0.111                | 88.6                      | 75.76                 |
| 48371              | Pecos, TX                 | 0.11                 | 88.38                     | 82.13                 |
| 48373              | Polk, TX                  | 0.051                | 75.55                     | 91.21                 |
| 48375              | Potter, TX                | 0.066                | 79.66                     | 92.48                 |
| 48377              | Presidio, TX              | 0.158                | 94.27                     | 99.81                 |
| 48379              | Rains, TX                 | 0.001                | 56.22                     | 40.16                 |
| 48381              | Randall, TX               | -0.04                | 37.63                     | 22.04                 |
| 48383              | Reagan, TX                | 0.056                | 77.01                     | 48.06                 |
| 48385              | Real, TX                  | -0.147               | 3.76                      | 71.69                 |
| 48387              | Red River, TX             | -0.001               | 55.62                     | 56.5                  |
| 48389              | Reeves, TX                | 0.123                | 90.39                     | 78.03                 |
| 48391              | Refugio, TX               | 0.047                | 74.15                     | 94.14                 |
| 48393              | Roberts, TX               | -0.123               | 7.26                      | 9.11                  |
| 48395              | Robertson, TX             | 0.086                | 84.08                     | 75.29                 |
| 48397              | Rockwall, TX              | 0.015                | 62.56                     | 11.24                 |
| 48399              | Runnels, TX               | -0.091               | 15.38                     | 54.49                 |
| 48401              | Rusk, TX                  | 0.054                | 76.28                     | 79.65                 |
| 48403              | Sabine, TX                | -0.01                | 51.48                     | 53.09                 |
| 48405              | San Augustine, TX         | 0.077                | 82.33                     | 88.89                 |
| 48407              | San Jacinto, TX           | 0.096                | 85.9                      | 68.69                 |
| 48409              | San Patricio, TX          | 0.09                 | 84.88                     | 83.09                 |
| 48411              | San Saba, TX              | -0.063               | 26.04                     | 73.15                 |
| 48413              | Schleicher, TX            | 0.221                | 97.45                     | 58.57                 |
| 48415              | Scurry, TX                | 0.092                | 85.23                     | 69.94                 |
| 48417              | Shackelford, TX           | 0.118                | 89.69                     | 68.5                  |
| 48419              | Shelby, TX                | 0.118                | 89.81                     | 95.22                 |
| 48421              | Sherman, TX               | -0.021               | 46.13                     | 46.11                 |
| 48423              | Smith, TX                 | 0.04                 | 71.89                     | 74.62                 |
| 48425              | Somervell, TX             | 0.066                | 79.56                     | 56.05                 |
| 48427              | Starr, TX                 | 0.366                | 99.3                      | 98.15                 |
| 48429              | Stephens, TX              | 0.008                | 59.92                     | 88.5                  |
| 48431              | Sterling, TX              | -0.08                | 19.13                     | 41.27                 |
| 48433              | Stonewall, TX             | -0.104               | 11.62                     | 32.36                 |
| 48435              | Sutton, TX                | 0.066                | 79.47                     | 60.41                 |

| <b>County FIPS</b> | <b>County Description</b> | <b>DOS-SVI Index</b> | <b>DOS-SVI Percentile</b> | <b>SVI Percentile</b> |
|--------------------|---------------------------|----------------------|---------------------------|-----------------------|
| 48437              | Swisher, TX               | 0.074                | 81.57                     | 97.01                 |
| 48439              | Tarrant, TX               | 0.03                 | 68.74                     | 54.75                 |
| 48441              | Taylor, TX                | -0.018               | 47.72                     | 69.33                 |
| 48443              | Terrell, TX               | -0.113               | 9.58                      | 47.13                 |
| 48445              | Terry, TX                 | 0.165                | 94.78                     | 98.76                 |
| 48447              | Throckmorton, TX          | -0.117               | 8.66                      | 26.78                 |
| 48449              | Titus, TX                 | 0.174                | 95.38                     | 89.01                 |
| 48451              | Tom Green, TX             | -0.023               | 45.46                     | 66.43                 |
| 48453              | Travis, TX                | 0.005                | 58.64                     | 38.12                 |
| 48455              | Trinity, TX               | 0.045                | 73.77                     | 80.16                 |
| 48457              | Tyler, TX                 | 0.153                | 93.89                     | 88.34                 |
| 48459              | Upshur, TX                | 0.118                | 89.65                     | 58.98                 |
| 48461              | Upton, TX                 | -0.009               | 51.89                     | 65.19                 |
| 48463              | Uvalde, TX                | 0.062                | 78.48                     | 95.48                 |
| 48465              | Val Verde, TX             | 0.136                | 92.04                     | 96.78                 |
| 48467              | Van Zandt, TX             | 0.015                | 62.4                      | 55.89                 |
| 48469              | Victoria, TX              | 0.07                 | 80.45                     | 78.34                 |
| 48471              | Walker, TX                | 0.041                | 72.17                     | 69.97                 |
| 48473              | Waller, TX                | 0.173                | 95.29                     | 83.31                 |
| 48475              | Ward, TX                  | 0.13                 | 91.34                     | 64.94                 |
| 48477              | Washington, TX            | 0.01                 | 60.49                     | 73.12                 |
| 48479              | Webb, TX                  | 0.234                | 97.8                      | 94.97                 |
| 48481              | Wharton, TX               | 0.053                | 75.87                     | 87.58                 |
| 48483              | Wheeler, TX               | 0.025                | 66.79                     | 69.62                 |
| 48485              | Wichita, TX               | 0.003                | 57.15                     | 81.66                 |
| 48487              | Wilbarger, TX             | -0.041               | 37.06                     | 90.83                 |
| 48489              | Willacy, TX               | 0.32                 | 98.89                     | 98.92                 |
| 48491              | Williamson, TX            | -0.002               | 55.2                      | 20.16                 |
| 48493              | Wilson, TX                | 0.125                | 90.64                     | 44.36                 |
| 48495              | Winkler, TX               | 0.06                 | 78.06                     | 65.41                 |
| 48497              | Wise, TX                  | 0.073                | 81.41                     | 57.68                 |
| 48499              | Wood, TX                  | -0.068               | 24.2                      | 63.22                 |
| 48501              | Yoakum, TX                | 0.234                | 97.83                     | 49.2                  |
| 48503              | Young, TX                 | -0.057               | 28.81                     | 55.32                 |
| 48505              | Zapata, TX                | 0.458                | 99.49                     | 98.95                 |
| 48507              | Zavala, TX                | 0.181                | 95.8                      | 99.87                 |
| 49001              | Beaver, UT                | 0.112                | 88.86                     | 25.22                 |
| 49003              | Box Elder, UT             | 0.053                | 75.9                      | 15.92                 |
| 49005              | Cache, UT                 | 0.073                | 81.15                     | 32.01                 |
| 49007              | Carbon, UT                | 0.039                | 71.6                      | 56.15                 |
| 49009              | Daggett, UT               | 0.061                | 78.35                     | 7.55                  |
| 49011              | Davis, UT                 | 0.047                | 73.96                     | 7.96                  |
| 49013              | Duchesne, UT              | 0.188                | 96.21                     | 48.22                 |
| 49015              | Emery, UT                 | 0.084                | 83.54                     | 26.27                 |
| 49017              | Garfield, UT              | -0.023               | 45.56                     | 45.92                 |
| 49019              | Grand, UT                 | 0.075                | 81.85                     | 52.13                 |
| 49021              | Iron, UT                  | 0.081                | 83.06                     | 45.25                 |
| 49023              | Juab, UT                  | 0.119                | 89.94                     | 23.31                 |
| 49025              | Kane, UT                  | -0.07                | 22.89                     | 10.54                 |
| 49027              | Millard, UT               | 0.031                | 68.96                     | 35.54                 |
| 49029              | Morgan, UT                | 0.045                | 73.73                     | 0.03                  |
| 49031              | Piute, UT                 | -0.064               | 25.69                     | 27.13                 |
| 49033              | Rich, UT                  | 0.025                | 66.7                      | 19.71                 |
| 49035              | Salt Lake, UT             | 0.026                | 67.14                     | 32.29                 |
| 49037              | San Juan, UT              | 0.269                | 98.44                     | 97.52                 |

| <b>County FIPS</b> | <b>County Description</b> | <b>DOS-SVI Index</b> | <b>DOS-SVI Percentile</b> | <b>SVI Percentile</b> |
|--------------------|---------------------------|----------------------|---------------------------|-----------------------|
| 49039              | Sanpete, UT               | 0.182                | 95.89                     | 60.19                 |
| 49041              | Sevier, UT                | 0.047                | 74.44                     | 32.61                 |
| 49043              | Summit, UT                | -0.074               | 21.52                     | 5                     |
| 49045              | Tooele, UT                | 0.115                | 89.33                     | 31.43                 |
| 49047              | Uintah, UT                | 0.176                | 95.61                     | 48.38                 |
| 49049              | Utah, UT                  | 0.147                | 93.31                     | 27.8                  |
| 49051              | Wasatch, UT               | 0.034                | 69.63                     | 6.43                  |
| 49053              | Washington, UT            | 0.029                | 68.07                     | 41.43                 |
| 49055              | Wayne, UT                 | -0.022               | 45.94                     | 29.08                 |
| 49057              | Weber, UT                 | 0.034                | 69.85                     | 42.71                 |
| 50001              | Addison, VT               | -0.09                | 15.92                     | 9.65                  |
| 50003              | Bennington, VT            | -0.125               | 6.65                      | 29.24                 |
| 50005              | Caledonia, VT             | -0.079               | 19.61                     | 26.72                 |
| 50007              | Chittenden, VT            | -0.073               | 21.94                     | 18.31                 |
| 50009              | Essex, VT                 | -0.126               | 6.5                       | 20.67                 |
| 50011              | Franklin, VT              | -0.035               | 40.4                      | 11.11                 |
| 50013              | Grand Isle, VT            | -0.092               | 14.87                     | 0.25                  |
| 50015              | Lamoille, VT              | -0.042               | 36.26                     | 13.09                 |
| 50017              | Orange, VT                | -0.062               | 26.46                     | 17.2                  |
| 50019              | Orleans, VT               | -0.095               | 13.88                     | 42.58                 |
| 50021              | Rutland, VT               | -0.033               | 41.1                      | 27.87                 |
| 50023              | Washington, VT            | -0.125               | 6.84                      | 17.52                 |
| 50025              | Windham, VT               | -0.08                | 19.17                     | 30.54                 |
| 50027              | Windsor, VT               | -0.114               | 9.52                      | 12.8                  |
| 51001              | Accomack, VA              | -0.063               | 26.43                     | 80.25                 |
| 51003              | Albemarle, VA             | -0.107               | 10.82                     | 17.32                 |
| 51005              | Alleghany, VA             | -0.077               | 20.44                     | 44.62                 |
| 51007              | Amelia, VA                | -0.016               | 48.93                     | 31.66                 |
| 51009              | Amherst, VA               | -0.016               | 48.62                     | 46.82                 |
| 51011              | Appomattox, VA            | -0.057               | 28.88                     | 36.37                 |
| 51013              | Arlington, VA             | -0.095               | 13.95                     | 14.01                 |
| 51015              | Augusta, VA               | -0.094               | 14.04                     | 14.9                  |
| 51017              | Bath, VA                  | -0.008               | 52.72                     | 24.71                 |
| 51019              | Bedford, VA               | -0.069               | 23.59                     | 9.84                  |
| 51021              | Bland, VA                 | 0.012                | 61.19                     | 34.49                 |
| 51023              | Botetourt, VA             | -0.102               | 12.07                     | 4.14                  |
| 51025              | Brunswick, VA             | -0.02                | 47.18                     | 89.55                 |
| 51027              | Buchanan, VA              | 0.044                | 73.26                     | 75.45                 |
| 51029              | Buckingham, VA            | 0.042                | 72.49                     | 79.01                 |
| 51031              | Campbell, VA              | -0.076               | 20.69                     | 26.15                 |
| 51033              | Caroline, VA              | 0.003                | 57.34                     | 34.81                 |
| 51035              | Carroll, VA               | -0.094               | 14.01                     | 33.69                 |
| 51036              | Charles City, VA          | -0.084               | 17.86                     | 23.66                 |
| 51037              | Charlotte, VA             | -0.033               | 41.23                     | 70.57                 |
| 51041              | Chesterfield, VA          | -0.049               | 33.02                     | 17.99                 |
| 51043              | Clarke, VA                | -0.136               | 4.93                      | 11.31                 |
| 51045              | Craig, VA                 | -0.15                | 3.34                      | 7.45                  |
| 51047              | Culpeper, VA              | 0.013                | 61.67                     | 48.82                 |
| 51049              | Cumberland, VA            | -0.015               | 49.35                     | 58.31                 |
| 51051              | Dickenson, VA             | -0.007               | 53.01                     | 68.06                 |
| 51053              | Dinwiddie, VA             | 0.005                | 58.74                     | 41.82                 |
| 51057              | Essex, VA                 | -0.076               | 20.73                     | 56.34                 |
| 51059              | Fairfax, VA               | -0.034               | 40.72                     | 18.76                 |
| 51061              | Fauquier, VA              | -0.091               | 15.12                     | 2.87                  |
| 51063              | Floyd, VA                 | -0.096               | 13.5                      | 11.15                 |

| <b>County FIPS</b> | <b>County Description</b> | <b>DOS-SVI Index</b> | <b>DOS-SVI Percentile</b> | <b>SVI Percentile</b> |
|--------------------|---------------------------|----------------------|---------------------------|-----------------------|
| 51065              | Fluvanna, VA              | -0.076               | 20.89                     | 6.31                  |
| 51067              | Franklin, VA              | -0.057               | 28.94                     | 40.1                  |
| 51069              | Frederick, VA             | -0.055               | 30.31                     | 18.22                 |
| 51071              | Giles, VA                 | -0.097               | 13.24                     | 27.42                 |
| 51073              | Gloucester, VA            | -0.095               | 13.82                     | 3.66                  |
| 51075              | Goochland, VA             | -0.124               | 7.04                      | 4.59                  |
| 51077              | Grayson, VA               | -0.03                | 42.79                     | 64.59                 |
| 51079              | Greene, VA                | -0.002               | 55.05                     | 16.31                 |
| 51081              | Greensville, VA           | 0.068                | 80.2                      | 81.4                  |
| 51083              | Halifax, VA               | -0.06                | 27.54                     | 67.23                 |
| 51085              | Hanover, VA               | -0.1                 | 12.32                     | 1.56                  |
| 51087              | Henrico, VA               | -0.056               | 29.61                     | 25.73                 |
| 51089              | Henry, VA                 | 0.03                 | 68.32                     | 88.57                 |
| 51091              | Highland, VA              | -0.305               | 0.06                      | 6.5                   |
| 51093              | Isle of Wight, VA         | 0.002                | 56.77                     | 33.92                 |
| 51095              | James City, VA            | -0.145               | 4.04                      | 11.5                  |
| 51097              | King and Queen, VA        | -0.034               | 40.47                     | 32.45                 |
| 51099              | King George, VA           | -0.021               | 46.16                     | 1.59                  |
| 51101              | King William, VA          | -0.061               | 27.06                     | 3.57                  |
| 51103              | Lancaster, VA             | -0.241               | 0.22                      | 15.83                 |
| 51105              | Lee, VA                   | 0.074                | 81.6                      | 80.73                 |
| 51107              | Loudoun, VA               | -0.003               | 54.85                     | 9.04                  |
| 51109              | Louisa, VA                | -0.006               | 53.8                      | 33.25                 |
| 51111              | Lunenburg, VA             | -0.012               | 50.68                     | 86.43                 |
| 51113              | Madison, VA               | -0.028               | 43.46                     | 16.4                  |
| 51115              | Mathews, VA               | -0.2                 | 0.6                       | 2.07                  |
| 51117              | Mecklenburg, VA           | -0.084               | 17.8                      | 77.68                 |
| 51119              | Middlesex, VA             | -0.153               | 3.18                      | 20.25                 |
| 51121              | Montgomery, VA            | -0.012               | 50.56                     | 29.59                 |
| 51125              | Nelson, VA                | -0.134               | 5.41                      | 30                    |
| 51127              | New Kent, VA              | -0.047               | 34.23                     | 0.61                  |
| 51131              | Northampton, VA           | -0.147               | 3.66                      | 67.64                 |
| 51133              | Northumberland, VA        | -0.195               | 0.76                      | 12.13                 |
| 51135              | Nottoway, VA              | -0.025               | 44.73                     | 90.96                 |
| 51137              | Orange, VA                | -0.041               | 36.8                      | 46.5                  |
| 51139              | Page, VA                  | -0.015               | 49.44                     | 39.36                 |
| 51141              | Patrick, VA               | -0.034               | 41.01                     | 63.89                 |
| 51143              | Pittsylvania, VA          | -0.02                | 46.96                     | 64.27                 |
| 51145              | Powhatan, VA              | -0.114               | 9.36                      | 0.57                  |
| 51147              | Prince Edward, VA         | 0.001                | 56.57                     | 72.96                 |
| 51149              | Prince George, VA         | 0.034                | 69.75                     | 31.75                 |
| 51153              | Prince William, VA        | 0.027                | 67.56                     | 30.22                 |
| 51155              | Pulaski, VA               | -0.075               | 20.92                     | 48.31                 |
| 51157              | Rappahannock, VA          | -0.157               | 2.64                      | 2.13                  |
| 51159              | Richmond, VA              | -0.073               | 21.87                     | 61.43                 |
| 51161              | Roanoke, VA               | -0.135               | 5.16                      | 13.12                 |
| 51163              | Rockbridge, VA            | -0.097               | 13.18                     | 14.33                 |
| 51165              | Rockingham, VA            | -0.056               | 29.74                     | 31.97                 |
| 51167              | Russell, VA               | 0.009                | 59.95                     | 44.87                 |
| 51169              | Scott, VA                 | -0.006               | 53.58                     | 67.58                 |
| 51171              | Shenandoah, VA            | -0.086               | 17.07                     | 36.43                 |
| 51173              | Smyth, VA                 | -0.03                | 42.88                     | 75.48                 |
| 51175              | Southampton, VA           | -0.074               | 21.59                     | 47.55                 |
| 51177              | Spotsylvania, VA          | 0.001                | 56.19                     | 21.59                 |
| 51179              | Stafford, VA              | -0.028               | 43.59                     | 15.41                 |

| <b>County FIPS</b> | <b>County Description</b>    | <b>DOS-SVI Index</b> | <b>DOS-SVI Percentile</b> | <b>SVI Percentile</b> |
|--------------------|------------------------------|----------------------|---------------------------|-----------------------|
| 51181              | Surry, VA                    | -0.02                | 46.64                     | 36.59                 |
| 51183              | Sussex, VA                   | 0.063                | 78.83                     | 90.92                 |
| 51185              | Tazewell, VA                 | 0.019                | 64.18                     | 59.36                 |
| 51187              | Warren, VA                   | -0.032               | 41.71                     | 25.64                 |
| 51191              | Washington, VA               | -0.054               | 30.79                     | 36.46                 |
| 51193              | Westmoreland, VA             | -0.05                | 32.54                     | 29.2                  |
| 51195              | Wise, VA                     | 0.076                | 82.01                     | 85.99                 |
| 51197              | Wythe, VA                    | -0.016               | 48.84                     | 39.65                 |
| 51199              | York, VA                     | -0.043               | 36.01                     | 19.97                 |
| 51510              | Alexandria City, VA          | -0.074               | 21.33                     | 20.03                 |
| 51520              | Bristol City, VA             | -0.098               | 12.77                     | 75.1                  |
| 51530              | Buena Vista City, VA         | -0.127               | 6.3                       | 32.42                 |
| 51540              | Charlottesville City,<br>VA  | -0.063               | 26.36                     | 40.92                 |
| 51550              | Chesapeake City, VA          | -0.029               | 43.36                     | 25.92                 |
| 51570              | Colonial Heights City,<br>VA | -0.031               | 41.93                     | 56.85                 |
| 51580              | Covington City, VA           | -0.051               | 31.77                     | 46.34                 |
| 51590              | Danville City, VA            | -0.002               | 55.43                     | 95.89                 |
| 51595              | Emporia City, VA             | 0.262                | 98.31                     | 95.67                 |
| 51600              | Fairfax City, VA             | -0.037               | 39.1                      | 24.11                 |
| 51610              | Falls Church City, VA        | -0.036               | 39.51                     | 13.89                 |
| 51620              | Franklin City, VA            | 0.047                | 74.21                     | 71.75                 |
| 51630              | Fredericksburg City,<br>VA   | -0.032               | 41.61                     | 56.31                 |
| 51640              | Galax City, VA               | -0.069               | 23.69                     | 98.38                 |
| 51650              | Hampton City, VA             | -0.006               | 53.1                      | 66.75                 |
| 51660              | Harrisonburg City, VA        | -0.011               | 51.07                     | 79.3                  |
| 51670              | Hopewell City, VA            | 0.048                | 74.56                     | 94.08                 |
| 51678              | Lexington City, VA           | -0.064               | 25.72                     | 32.26                 |
| 51680              | Lynchburg City, VA           | -0.02                | 46.9                      | 73.69                 |
| 51683              | Manassas City, VA            | 0.04                 | 71.86                     | 44.46                 |
| 51685              | Manassas Park City,<br>VA    | 0.019                | 64.02                     | 52.8                  |
| 51690              | Martinsville City, VA        | -0.055               | 30.28                     | 91.05                 |
| 51700              | Newport News City,<br>VA     | 0.015                | 62.27                     | 81.56                 |
| 51710              | Norfolk City, VA             | 0.031                | 68.83                     | 77.17                 |
| 51720              | Norton City, VA              | 0.11                 | 88.47                     | 90.54                 |
| 51730              | Petersburg City, VA          | 0.062                | 78.57                     | 96.43                 |
| 51735              | Poquoson City, VA            | -0.101               | 12.13                     | 1.27                  |
| 51740              | Portsmouth City, VA          | 0.037                | 70.97                     | 80.06                 |
| 51750              | Radford City, VA             | 0.001                | 56.26                     | 41.24                 |
| 51760              | Richmond City, VA            | -0.013               | 50.17                     | 77.29                 |
| 51770              | Roanoke City, VA             | -0.033               | 41.42                     | 80.38                 |
| 51775              | Salem City, VA               | -0.104               | 11.53                     | 30.89                 |
| 51790              | Staunton City, VA            | -0.143               | 4.3                       | 44.49                 |
| 51800              | Suffolk City, VA             | -0.005               | 54.16                     | 34.68                 |
| 51810              | Virginia Beach City,<br>VA   | -0.059               | 28.14                     | 18.89                 |
| 51820              | Waynesboro City, VA          | -0.084               | 17.89                     | 60.13                 |
| 51830              | Williamsburg City, VA        | -0.03                | 42.73                     | 38.5                  |
| 51840              | Winchester City, VA          | -0.078               | 19.71                     | 72.2                  |
| 53001              | Adams, WA                    | 0.297                | 98.73                     | 96.21                 |
| 53003              | Asotin, WA                   | -0.037               | 39.19                     | 42.48                 |

| <b>County FIPS</b> | <b>County Description</b> | <b>DOS-SVI Index</b> | <b>DOS-SVI Percentile</b> | <b>SVI Percentile</b> |
|--------------------|---------------------------|----------------------|---------------------------|-----------------------|
| 53005              | Benton, WA                | 0.029                | 68.29                     | 51.4                  |
| 53007              | Chelan, WA                | -0.015               | 49.22                     | 67.8                  |
| 53009              | Clallam, WA               | -0.066               | 25.15                     | 61.46                 |
| 53011              | Clark, WA                 | 0.005                | 58.58                     | 28.57                 |
| 53013              | Columbia, WA              | -0.134               | 5.38                      | 31.46                 |
| 53015              | Cowlitz, WA               | 0.022                | 65.62                     | 78.85                 |
| 53017              | Douglas, WA               | 0.054                | 76.47                     | 77.07                 |
| 53019              | Ferry, WA                 | 0.033                | 69.28                     | 82.23                 |
| 53021              | Franklin, WA              | 0.196                | 96.75                     | 86.91                 |
| 53023              | Garfield, WA              | 0.004                | 57.82                     | 18.34                 |
| 53025              | Grant, WA                 | 0.142                | 92.61                     | 84.52                 |
| 53027              | Grays Harbor, WA          | 0.012                | 61.22                     | 83.92                 |
| 53029              | Island, WA                | -0.083               | 18.4                      | 18.57                 |
| 53031              | Jefferson, WA             | -0.168               | 1.97                      | 24.14                 |
| 53033              | King, WA                  | -0.029               | 42.95                     | 28.54                 |
| 53035              | Kitsap, WA                | -0.046               | 34.61                     | 28.25                 |
| 53037              | Kittitas, WA              | -0.017               | 48.3                      | 28.31                 |
| 53039              | Klickitat, WA             | 0.027                | 67.43                     | 57.23                 |
| 53041              | Lewis, WA                 | 0.045                | 73.7                      | 78.89                 |
| 53043              | Lincoln, WA               | -0.071               | 22.7                      | 19.84                 |
| 53045              | Mason, WA                 | 0.009                | 60.2                      | 63.82                 |
| 53047              | Okanogan, WA              | 0.02                 | 64.82                     | 92.55                 |
| 53049              | Pacific, WA               | -0.099               | 12.61                     | 73.6                  |
| 53051              | Pend Oreille, WA          | -0.006               | 53.84                     | 53.6                  |
| 53053              | Pierce, WA                | 0.012                | 61.09                     | 48.73                 |
| 53055              | San Juan, WA              | -0.197               | 0.7                       | 8.63                  |
| 53057              | Skagit, WA                | 0.016                | 62.97                     | 53.82                 |
| 53059              | Skamania, WA              | -0.013               | 50.05                     | 21.94                 |
| 53061              | Snohomish, WA             | -0.011               | 50.97                     | 27.55                 |
| 53063              | Spokane, WA               | -0.032               | 41.67                     | 48.25                 |
| 53065              | Stevens, WA               | 0.017                | 63.48                     | 46.15                 |
| 53067              | Thurston, WA              | -0.005               | 53.9                      | 32.99                 |
| 53069              | Wahkiakum, WA             | -0.139               | 4.68                      | 18.09                 |
| 53071              | Walla Walla, WA           | -0.015               | 49.16                     | 68.31                 |
| 53073              | Whatcom, WA               | -0.003               | 54.7                      | 45.41                 |
| 53075              | Whitman, WA               | 0.072                | 80.96                     | 51.08                 |
| 53077              | Yakima, WA                | 0.146                | 93.16                     | 92.77                 |
| 54001              | Barbour, WV               | 0.023                | 65.71                     | 65.13                 |
| 54003              | Berkeley, WV              | 0.038                | 71.12                     | 44.33                 |
| 54005              | Boone, WV                 | 0.113                | 89.17                     | 70.41                 |
| 54007              | Braxton, WV               | 0.153                | 93.98                     | 66.46                 |
| 54009              | Brooke, WV                | -0.119               | 7.9                       | 33.06                 |
| 54011              | Cabell, WV                | -0.056               | 29.48                     | 62.45                 |
| 54013              | Calhoun, WV               | 0.143                | 92.74                     | 52.39                 |
| 54015              | Clay, WV                  | 0.102                | 87.04                     | 68.85                 |
| 54017              | Doddridge, WV             | -0.021               | 46.48                     | 36.08                 |
| 54019              | Fayette, WV               | 0.003                | 57.43                     | 76.4                  |
| 54021              | Gilmer, WV                | 0.075                | 81.82                     | 75.64                 |
| 54023              | Grant, WV                 | -0.065               | 25.18                     | 36.75                 |
| 54025              | Greenbrier, WV            | -0.029               | 43.08                     | 55.57                 |
| 54027              | Hampshire, WV             | -0.022               | 45.84                     | 64.33                 |
| 54029              | Hancock, WV               | -0.052               | 31.49                     | 40.51                 |
| 54031              | Hardy, WV                 | -0.108               | 10.57                     | 28.5                  |
| 54033              | Harrison, WV              | -0.004               | 54.41                     | 40.89                 |
| 54035              | Jackson, WV               | -0.013               | 49.95                     | 25.29                 |

| <b>County FIPS</b> | <b>County Description</b> | <b>DOS-SVI Index</b> | <b>DOS-SVI Percentile</b> | <b>SVI Percentile</b> |
|--------------------|---------------------------|----------------------|---------------------------|-----------------------|
| 54037              | Jefferson, WV             | 0.016                | 62.78                     | 22.55                 |
| 54039              | Kanawha, WV               | -0.053               | 31.11                     | 56.56                 |
| 54041              | Lewis, WV                 | 0.009                | 60.01                     | 67.61                 |
| 54043              | Lincoln, WV               | 0.091                | 85.1                      | 60.57                 |
| 54045              | Logan, WV                 | 0.132                | 91.66                     | 74.71                 |
| 54047              | McDowell, WV              | 0.113                | 89.21                     | 90.29                 |
| 54049              | Marion, WV                | -0.03                | 42.85                     | 49.39                 |
| 54051              | Marshall, WV              | -0.062               | 26.77                     | 21.53                 |
| 54053              | Mason, WV                 | 0.023                | 65.68                     | 54.97                 |
| 54055              | Mercer, WV                | -0.042               | 36.55                     | 80.89                 |
| 54057              | Mineral, WV               | -0.067               | 24.55                     | 59.33                 |
| 54059              | Mingo, WV                 | 0.241                | 97.96                     | 78.5                  |
| 54061              | Monongalia, WV            | 0.048                | 74.63                     | 41.11                 |
| 54063              | Monroe, WV                | -0.016               | 48.65                     | 46.62                 |
| 54065              | Morgan, WV                | 0.033                | 69.56                     | 17.64                 |
| 54067              | Nicholas, WV              | 0.019                | 64.09                     | 54.11                 |
| 54069              | Ohio, WV                  | -0.092               | 14.77                     | 31.08                 |
| 54071              | Pendleton, WV             | -0.083               | 18.08                     | 35.8                  |
| 54073              | Pleasants, WV             | 0.027                | 67.53                     | 44.68                 |
| 54075              | Pocahontas, WV            | -0.102               | 11.91                     | 49.71                 |
| 54077              | Preston, WV               | 0.05                 | 75.29                     | 57.32                 |
| 54079              | Putnam, WV                | -0.056               | 29.7                      | 4.08                  |
| 54081              | Raleigh, WV               | 0.005                | 58.36                     | 76.85                 |
| 54083              | Randolph, WV              | -0.021               | 46.32                     | 58.06                 |
| 54085              | Ritchie, WV               | -0.005               | 54.03                     | 36.4                  |
| 54087              | Roane, WV                 | 0.072                | 81.06                     | 64.65                 |
| 54089              | Summers, WV               | 0.021                | 65.01                     | 82.9                  |
| 54091              | Taylor, WV                | -0.002               | 55.24                     | 49.49                 |
| 54093              | Tucker, WV                | -0.096               | 13.56                     | 36.72                 |
| 54095              | Tyler, WV                 | -0.031               | 42.12                     | 22.13                 |
| 54097              | Upshur, WV                | 0.022                | 65.55                     | 69.11                 |
| 54099              | Wayne, WV                 | 0.03                 | 68.64                     | 60.06                 |
| 54101              | Webster, WV               | 0.039                | 71.67                     | 74.87                 |
| 54103              | Wetzel, WV                | -0.032               | 41.77                     | 47.52                 |
| 54105              | Wirt, WV                  | -0.002               | 55.14                     | 37.48                 |
| 54107              | Wood, WV                  | -0.068               | 24.07                     | 37.23                 |
| 54109              | Wyoming, WV               | 0.158                | 94.24                     | 64.43                 |
| 55001              | Adams, WI                 | -0.052               | 31.55                     | 56.85                 |
| 55003              | Ashland, WI               | -0.016               | 48.42                     | 55                    |
| 55005              | Barron, WI                | -0.09                | 15.66                     | 32.71                 |
| 55007              | Bayfield, WI              | -0.115               | 9.01                      | 9.9                   |
| 55009              | Brown, WI                 | -0.058               | 28.62                     | 32.99                 |
| 55011              | Buffalo, WI               | -0.14                | 4.52                      | 5.76                  |
| 55013              | Burnett, WI               | -0.137               | 4.87                      | 16.72                 |
| 55015              | Calumet, WI               | -0.078               | 19.9                      | 1.82                  |
| 55017              | Chippewa, WI              | -0.072               | 22.16                     | 21.05                 |
| 55019              | Clark, WI                 | 0.027                | 67.62                     | 53.5                  |
| 55021              | Columbia, WI              | -0.089               | 16.17                     | 12.04                 |
| 55023              | Crawford, WI              | -0.081               | 18.85                     | 39.71                 |
| 55025              | Dane, WI                  | -0.08                | 19.23                     | 16.88                 |
| 55027              | Dodge, WI                 | -0.072               | 22.38                     | 20.19                 |
| 55029              | Door, WI                  | -0.184               | 1.18                      | 5.57                  |
| 55031              | Douglas, WI               | -0.078               | 19.93                     | 27.48                 |
| 55033              | Dunn, WI                  | -0.038               | 38.59                     | 18.47                 |
| 55035              | Eau Claire, WI            | -0.061               | 27.22                     | 21.75                 |



| <b>County FIPS</b> | <b>County Description</b> | <b>DOS-SVI Index</b> | <b>DOS-SVI Percentile</b> | <b>SVI Percentile</b> |
|--------------------|---------------------------|----------------------|---------------------------|-----------------------|
| 55037              | Florence, WI              | -0.065               | 25.25                     | 14.52                 |
| 55039              | Fond du Lac, WI           | -0.08                | 19.01                     | 20.38                 |
| 55041              | Forest, WI                | -0.043               | 35.88                     | 57.74                 |
| 55043              | Grant, WI                 | -0.058               | 28.72                     | 19.39                 |
| 55045              | Green, WI                 | -0.118               | 8.12                      | 5.29                  |
| 55047              | Green Lake, WI            | -0.094               | 14.1                      | 28.69                 |
| 55049              | Iowa, WI                  | -0.084               | 17.99                     | 1.31                  |
| 55051              | Iron, WI                  | -0.126               | 6.53                      | 36.02                 |
| 55053              | Jackson, WI               | -0.016               | 48.52                     | 50.03                 |
| 55055              | Jefferson, WI             | -0.064               | 25.66                     | 18.54                 |
| 55057              | Juneau, WI                | -0.038               | 38.49                     | 37.8                  |
| 55059              | Kenosha, WI               | -0.001               | 55.75                     | 51.11                 |
| 55061              | Kewaunee, WI              | -0.092               | 14.93                     | 5.86                  |
| 55063              | La Crosse, WI             | -0.063               | 26.01                     | 20.89                 |
| 55065              | Lafayette, WI             | -0.081               | 18.72                     | 15.96                 |
| 55067              | Langlade, WI              | -0.063               | 26.11                     | 35.35                 |
| 55069              | Lincoln, WI               | -0.111               | 10.09                     | 10.13                 |
| 55071              | Manitowoc, WI             | -0.113               | 9.62                      | 16.21                 |
| 55073              | Marathon, WI              | -0.056               | 29.45                     | 14.43                 |
| 55075              | Marinette, WI             | -0.086               | 17.16                     | 29.71                 |
| 55077              | Marquette, WI             | -0.068               | 24.16                     | 25.96                 |
| 55078              | Menominee, WI             | 0.159                | 94.3                      | 76.72                 |
| 55079              | Milwaukee, WI             | -0.012               | 50.62                     | 80.61                 |
| 55081              | Monroe, WI                | -0.039               | 37.95                     | 46.21                 |
| 55083              | Oconto, WI                | -0.072               | 22.09                     | 6.4                   |
| 55085              | Oneida, WI                | -0.165               | 2.13                      | 1.4                   |
| 55087              | Outagamie, WI             | -0.064               | 25.82                     | 9.78                  |
| 55089              | Ozaukee, WI               | -0.127               | 6.4                       | 1.34                  |
| 55091              | Pepin, WI                 | -0.13                | 5.83                      | 10.19                 |
| 55093              | Pierce, WI                | -0.07                | 23.11                     | 8.06                  |
| 55095              | Polk, WI                  | -0.085               | 17.7                      | 8.73                  |
| 55097              | Portage, WI               | -0.069               | 23.34                     | 16.53                 |
| 55099              | Price, WI                 | -0.147               | 3.79                      | 16.02                 |
| 55101              | Racine, WI                | -0.072               | 22.45                     | 45.51                 |
| 55103              | Richland, WI              | -0.103               | 11.72                     | 30.73                 |
| 55105              | Rock, WI                  | -0.043               | 36.2                      | 45.61                 |
| 55107              | Rusk, WI                  | -0.092               | 14.8                      | 34.65                 |
| 55109              | St. Croix, WI             | -0.07                | 22.92                     | 1.46                  |
| 55111              | Sauk, WI                  | -0.077               | 20.47                     | 23.44                 |
| 55113              | Sawyer, WI                | -0.086               | 17.29                     | 42.68                 |
| 55115              | Shawano, WI               | -0.105               | 11.24                     | 13.82                 |
| 55117              | Sheboygan, WI             | -0.072               | 22.25                     | 22.45                 |
| 55119              | Taylor, WI                | -0.05                | 32.35                     | 20                    |
| 55121              | Trempealeau, WI           | -0.062               | 26.62                     | 28.12                 |
| 55123              | Vernon, WI                | -0.017               | 48.04                     | 38.34                 |
| 55125              | Vilas, WI                 | -0.131               | 5.73                      | 13.95                 |
| 55127              | Walworth, WI              | -0.067               | 24.42                     | 26.88                 |
| 55129              | Washburn, WI              | -0.118               | 8.47                      | 10.8                  |
| 55131              | Washington, WI            | -0.117               | 8.6                       | 0.99                  |
| 55133              | Waukesha, WI              | -0.114               | 9.42                      | 1.94                  |
| 55135              | Waupaca, WI               | -0.122               | 7.54                      | 18.15                 |
| 55137              | Waushara, WI              | -0.098               | 12.93                     | 36.53                 |
| 55139              | Winnebago, WI             | -0.097               | 13.09                     | 16.08                 |
| 55141              | Wood, WI                  | -0.106               | 11.08                     | 15.35                 |
| 56001              | Albany, WY                | 0.02                 | 64.63                     | 24.94                 |

| <b>County FIPS</b> | <b>County Description</b> | <b>DOS-SVI Index</b> | <b>DOS-SVI Percentile</b> | <b>SVI Percentile</b> |
|--------------------|---------------------------|----------------------|---------------------------|-----------------------|
| 56003              | Big Horn, WY              | 0.011                | 60.94                     | 39.55                 |
| 56005              | Campbell, WY              | 0.096                | 85.96                     | 33.15                 |
| 56007              | Carbon, WY                | -0.012               | 50.43                     | 50.29                 |
| 56009              | Converse, WY              | 0.041                | 72.08                     | 20.48                 |
| 56011              | Crook, WY                 | 0.015                | 62.15                     | 3.28                  |
| 56013              | Fremont, WY               | 0.068                | 80.23                     | 56.24                 |
| 56015              | Goshen, WY                | -0.038               | 38.36                     | 32.64                 |
| 56017              | Hot Springs, WY           | -0.119               | 7.86                      | 12.29                 |
| 56019              | Johnson, WY               | -0.094               | 14.14                     | 17.74                 |
| 56021              | Laramie, WY               | -0.019               | 47.63                     | 26.97                 |
| 56023              | Lincoln, WY               | 0.021                | 65.11                     | 8.09                  |
| 56025              | Natrona, WY               | -0.024               | 44.86                     | 29.52                 |
| 56027              | Niobrara, WY              | -0.073               | 21.97                     | 33.6                  |
| 56029              | Park, WY                  | -0.101               | 12.29                     | 6.59                  |
| 56031              | Platte, WY                | -0.134               | 5.25                      | 9.52                  |
| 56033              | Sheridan, WY              | -0.103               | 11.84                     | 8.95                  |
| 56035              | Sublette, WY              | -0.053               | 31.3                      | 2.93                  |
| 56037              | Sweetwater, WY            | 0.059                | 77.71                     | 37.01                 |
| 56039              | Teton, WY                 | -0.017               | 48.23                     | 11.27                 |
| 56041              | Uinta, WY                 | 0.136                | 92.07                     | 45.22                 |
| 56043              | Washakie, WY              | -0.004               | 54.35                     | 37.32                 |
| 56045              | Weston, WY                | -0.018               | 47.95                     | 34.75                 |

Appendix Table 4: COVID DOS-SVI and CDC SVI Percentiles by County

| County FIPS | County Description | DOS-SVI Index | DOS-SVI Percentile | SVI Percentile |
|-------------|--------------------|---------------|--------------------|----------------|
| 01001       | Autauga, AL        | 0.008         | 56.73              | 43.54          |
| 01003       | Baldwin, AL        | -0.175        | 7.32               | 21.62          |
| 01005       | Barbour, AL        | 0.188         | 91.66              | 99.59          |
| 01007       | Bibb, AL           | 0.145         | 86.5               | 60.03          |
| 01009       | Blount, AL         | 0.064         | 72.11              | 42.42          |
| 01011       | Bullock, AL        | -0.035        | 44.8               | 88.98          |
| 01013       | Butler, AL         | 0.058         | 70.33              | 86.53          |
| 01015       | Calhoun, AL        | -0.002        | 54.12              | 82.52          |
| 01017       | Chambers, AL       | -0.006        | 52.88              | 73.82          |
| 01019       | Cherokee, AL       | 0.077         | 75.17              | 45.16          |
| 01021       | Chilton, AL        | 0.133         | 85.04              | 76.02          |
| 01023       | Choctaw, AL        | 0.101         | 79.81              | 87.48          |
| 01025       | Clarke, AL         | 0.171         | 90.07              | 84.71          |
| 01027       | Clay, AL           | -0.016        | 50.37              | 56.4           |
| 01029       | Cleburne, AL       | 0.13          | 84.46              | 54.17          |
| 01031       | Coffee, AL         | -0.025        | 47.72              | 54.08          |
| 01033       | Colbert, AL        | -0.081        | 30.85              | 42.74          |
| 01035       | Conecuh, AL        | 0.06          | 70.84              | 80.86          |
| 01037       | Coosa, AL          | 0.021         | 60.94              | 52.61          |
| 01039       | Covington, AL      | 0.072         | 73.99              | 77.23          |
| 01041       | Crenshaw, AL       | 0.039         | 65.62              | 68.73          |
| 01043       | Cullman, AL        | 0.08          | 75.8               | 51.82          |
| 01045       | Dale, AL           | 0.074         | 74.63              | 75.99          |
| 01047       | Dallas, AL         | 0.151         | 87.2               | 94.9           |
| 01049       | DeKalb, AL         | 0.099         | 79.11              | 80.22          |
| 01051       | Elmore, AL         | 0.005         | 56                 | 54.01          |
| 01053       | Escambia, AL       | 0.154         | 87.74              | 85.57          |
| 01055       | Etowah, AL         | -0.045        | 41.55              | 65.64          |
| 01057       | Fayette, AL        | 0.068         | 73.13              | 70.38          |
| 01059       | Franklin, AL       | 0.069         | 73.29              | 84.17          |
| 01061       | Geneva, AL         | 0.119         | 82.81              | 79.55          |
| 01063       | Greene, AL         | 0.274         | 96.97              | 98.54          |
| 01065       | Hale, AL           | 0.232         | 95.22              | 95.99          |
| 01067       | Henry, AL          | 0.012         | 58.55              | 55.19          |
| 01069       | Houston, AL        | -0.054        | 38.97              | 68.38          |
| 01071       | Jackson, AL        | 0.073         | 74.18              | 57.26          |
| 01073       | Jefferson, AL      | -0.17         | 7.86               | 66.21          |
| 01075       | Lamar, AL          | 0.118         | 82.65              | 62.64          |
| 01077       | Lauderdale, AL     | -0.075        | 32.44              | 44.68          |
| 01079       | Lawrence, AL       | 0.059         | 70.61              | 49.52          |
| 01081       | Lee, AL            | -0.021        | 48.84              | 66.02          |
| 01083       | Limestone, AL      | 0.007         | 56.67              | 52.96          |
| 01085       | Lowndes, AL        | 0.13          | 84.56              | 91.88          |
| 01087       | Macon, AL          | 0.069         | 73.32              | 89.71          |
| 01089       | Madison, AL        | -0.16         | 9.58               | 30.76          |
| 01091       | Marengo, AL        | 0.085         | 76.5               | 76.21          |
| 01093       | Marion, AL         | 0.074         | 74.66              | 67.1           |
| 01095       | Marshall, AL       | 0.021         | 61.09              | 72.61          |
| 01097       | Mobile, AL         | -0.076        | 32.38              | 75.32          |
| 01099       | Monroe, AL         | 0.161         | 88.95              | 74.81          |
| 01101       | Montgomery, AL     | -0.131        | 15.7               | 84.27          |
| 01103       | Morgan, AL         | -0.033        | 45.46              | 68.95          |
| 01105       | Perry, AL          | 0.21          | 93.73              | 99.49          |
| 01107       | Pickens, AL        | 0.095         | 78.32              | 92.07          |

| <b>County FIPS</b> | <b>County Description</b>        | <b>DOS-SVI Index</b> | <b>DOS-SVI Percentile</b> | <b>SVI Percentile</b> |
|--------------------|----------------------------------|----------------------|---------------------------|-----------------------|
| 01109              | Pike, AL                         | 0.049                | 68.07                     | 90.16                 |
| 01111              | Randolph, AL                     | 0.096                | 78.42                     | 71.91                 |
| 01113              | Russell, AL                      | 0.093                | 78.13                     | 91.15                 |
| 01115              | St. Clair, AL                    | 0.042                | 66.57                     | 36.56                 |
| 01117              | Shelby, AL                       | -0.122               | 18.18                     | 11.69                 |
| 01119              | Sumter, AL                       | 0.151                | 87.27                     | 95.57                 |
| 01121              | Talladega, AL                    | 0.06                 | 70.87                     | 87.36                 |
| 01123              | Tallapoosa, AL                   | 0.084                | 76.31                     | 88.63                 |
| 01125              | Tuscaloosa, AL                   | -0.13                | 16.14                     | 62.55                 |
| 01127              | Walker, AL                       | 0.153                | 87.65                     | 74.52                 |
| 01129              | Washington, AL                   | 0.154                | 87.71                     | 73.03                 |
| 01131              | Wilcox, AL                       | 0.306                | 97.64                     | 92.8                  |
| 01133              | Winston, AL                      | 0.093                | 78.06                     | 70.25                 |
| 02013              | Aleutians East, AK               | -0.041               | 42.76                     | 58.03                 |
| 02016              | Aleutians West, AK               | 0.163                | 89.17                     | 49.27                 |
| 02020              | Anchorage, AK                    | -0.045               | 41.8                      | 46.02                 |
| 02050              | Bethel, AK                       | 1.836                | 99.94                     | 97.48                 |
| 02060              | Bristol Bay, AK                  | 0.097                | 78.92                     | 35.25                 |
| 02068              | Denali, AK                       | 0.147                | 86.85                     | 10.1                  |
| 02070              | Dillingham, AK                   | 1.085                | 99.81                     | 86.82                 |
| 02090              | Fairbanks North Star,<br>AK      | 0.101                | 79.85                     | 34.46                 |
| 02100              | Haines, AK                       | 0.158                | 88.35                     | 20.7                  |
| 02105              | Hoonah-Angoon, AK                | 0.183                | 91.05                     | 41.78                 |
| 02110              | Juneau City and<br>Borough, AK   | 0.002                | 55.14                     | 29.87                 |
| 02122              | Kenai Peninsula, AK              | 0.088                | 77.2                      | 40.73                 |
| 02130              | Ketchikan Gateway,<br>AK         | -0.026               | 47.21                     | 55.48                 |
| 02150              | Kodiak Island, AK                | 0.121                | 83.22                     | 70.06                 |
| 02158              | Kusilvak, AK                     | 2.76                 | 100                       | 93.34                 |
| 02164              | Lake and Peninsula, AK           | 0.652                | 99.62                     | 79.78                 |
| 02170              | Matanuska-Susitna, AK            | 0.16                 | 88.79                     | 31.72                 |
| 02180              | Nome, AK                         | 1.57                 | 99.87                     | 92.99                 |
| 02185              | North Slope, AK                  | 1.41                 | 99.84                     | 73.44                 |
| 02188              | Northwest Arctic, AK             | 1.84                 | 99.97                     | 93.54                 |
| 02195              | Petersburg, AK                   | 0.017                | 59.79                     | 66.5                  |
| 02198              | Prince of Wales-Hyder,<br>AK     | 0.243                | 95.83                     | 76.62                 |
| 02220              | Sitka City and Borough,<br>AK    | -0.015               | 50.59                     | 40.22                 |
| 02230              | Skagway, AK                      | 0.111                | 81.63                     | 16.85                 |
| 02240              | Southeast Fairbanks,<br>AK       | 0.336                | 98.31                     | 58.38                 |
| 02261              | Valdez-Cordova, AK               | 0.024                | 61.92                     | 27.04                 |
| 02275              | Wrangell City and<br>Borough, AK | -0.003               | 53.8                      | 56.18                 |
| 02282              | Yakutat City and<br>Borough, AK  | 0.207                | 93.28                     | 58.73                 |
| 02290              | Yukon-Koyukuk, AK                | 1.019                | 99.78                     | 88.12                 |
| 04001              | Apache, AZ                       | 0.575                | 99.46                     | 98.85                 |
| 04003              | Cochise, AZ                      | -0.045               | 41.67                     | 90.64                 |
| 04005              | Coconino, AZ                     | 0.191                | 91.85                     | 71.31                 |
| 04007              | Gila, AZ                         | 0.067                | 72.75                     | 89.9                  |
| 04009              | Graham, AZ                       | 0.346                | 98.38                     | 96.4                  |

| <b>County FIPS</b> | <b>County Description</b> | <b>DOS-SVI Index</b> | <b>DOS-SVI Percentile</b> | <b>SVI Percentile</b> |
|--------------------|---------------------------|----------------------|---------------------------|-----------------------|
| 04011              | Greenlee, AZ              | 0.119                | 82.71                     | 61.88                 |
| 04012              | La Paz, AZ                | 0.119                | 82.84                     | 92.36                 |
| 04013              | Maricopa, AZ              | -0.105               | 23.14                     | 63.54                 |
| 04015              | Mohave, AZ                | 0.029                | 63.07                     | 86.24                 |
| 04017              | Navajo, AZ                | 0.419                | 98.89                     | 99.55                 |
| 04019              | Pima, AZ                  | -0.089               | 28.49                     | 88.28                 |
| 04021              | Pinal, AZ                 | 0.08                 | 75.77                     | 85.92                 |
| 04023              | Santa Cruz, AZ            | -0.12                | 18.88                     | 93.18                 |
| 04025              | Yavapai, AZ               | -0.086               | 29.29                     | 52.1                  |
| 04027              | Yuma, AZ                  | 0.106                | 80.55                     | 98.95                 |
| 05001              | Arkansas, AR              | 0.025                | 62.08                     | 77.87                 |
| 05003              | Ashley, AR                | 0.061                | 71.03                     | 85.76                 |
| 05005              | Baxter, AR                | -0.085               | 29.8                      | 27.93                 |
| 05007              | Benton, AR                | -0.048               | 40.66                     | 27.07                 |
| 05009              | Boone, AR                 | 0.031                | 63.74                     | 43.79                 |
| 05011              | Bradley, AR               | 0.079                | 75.64                     | 98.03                 |
| 05013              | Calhoun, AR               | 0.053                | 68.96                     | 54.81                 |
| 05015              | Carroll, AR               | 0.118                | 82.55                     | 59.52                 |
| 05017              | Chicot, AR                | 0.061                | 71.16                     | 99.68                 |
| 05019              | Clark, AR                 | 0.033                | 64.18                     | 78.92                 |
| 05021              | Clay, AR                  | 0.005                | 56.03                     | 65.29                 |
| 05023              | Cleburne, AR              | -0.057               | 38.08                     | 20.83                 |
| 05025              | Cleveland, AR             | 0.063                | 71.6                      | 56.43                 |
| 05027              | Columbia, AR              | 0.133                | 84.85                     | 93.98                 |
| 05029              | Conway, AR                | 0.062                | 71.44                     | 75.89                 |
| 05031              | Craighead, AR             | -0.025               | 47.66                     | 80.41                 |
| 05033              | Crawford, AR              | 0.057                | 69.75                     | 61.05                 |
| 05035              | Crittenden, AR            | 0.071                | 73.8                      | 93.41                 |
| 05037              | Cross, AR                 | 0.03                 | 63.58                     | 70.13                 |
| 05039              | Dallas, AR                | 0.064                | 71.92                     | 87.77                 |
| 05041              | Desha, AR                 | 0.106                | 80.67                     | 95.96                 |
| 05043              | Drew, AR                  | 0.089                | 77.36                     | 80.1                  |
| 05045              | Faulkner, AR              | 0.005                | 56.16                     | 47.74                 |
| 05047              | Franklin, AR              | 0.139                | 85.9                      | 59.43                 |
| 05049              | Fulton, AR                | 0.134                | 85.29                     | 66.88                 |
| 05051              | Garland, AR               | -0.078               | 31.9                      | 82.8                  |
| 05053              | Grant, AR                 | 0.061                | 70.93                     | 35.41                 |
| 05055              | Greene, AR                | 0.08                 | 75.74                     | 58.34                 |
| 05057              | Hempstead, AR             | 0.022                | 61.45                     | 94.68                 |
| 05059              | Hot Spring, AR            | 0.162                | 89.08                     | 81.88                 |
| 05061              | Howard, AR                | 0.01                 | 57.62                     | 90.45                 |
| 05063              | Independence, AR          | 0.05                 | 68.45                     | 75.25                 |
| 05065              | Izard, AR                 | 0.109                | 81.06                     | 56.97                 |
| 05067              | Jackson, AR               | 0.155                | 87.81                     | 76.5                  |
| 05069              | Jefferson, AR             | 0.047                | 67.75                     | 94.36                 |
| 05071              | Johnson, AR               | 0.098                | 79.08                     | 87.68                 |
| 05073              | Lafayette, AR             | 0.021                | 61                        | 78.98                 |
| 05075              | Lawrence, AR              | 0.053                | 68.99                     | 64.71                 |
| 05077              | Lee, AR                   | 0.245                | 95.92                     | 96.56                 |
| 05079              | Lincoln, AR               | 0.436                | 99.05                     | 81.34                 |
| 05081              | Little River, AR          | 0.045                | 67.11                     | 63.06                 |
| 05083              | Logan, AR                 | 0.06                 | 70.9                      | 80.45                 |
| 05085              | Lonoke, AR                | 0.039                | 65.65                     | 33.09                 |
| 05087              | Madison, AR               | 0.132                | 84.78                     | 65.35                 |
| 05089              | Marion, AR                | 0.045                | 67.27                     | 51.75                 |

| <b>County FIPS</b> | <b>County Description</b> | <b>DOS-SVI Index</b> | <b>DOS-SVI Percentile</b> | <b>SVI Percentile</b> |
|--------------------|---------------------------|----------------------|---------------------------|-----------------------|
| 05091              | Miller, AR                | 0.061                | 71.19                     | 91.24                 |
| 05093              | Mississippi, AR           | 0.136                | 85.55                     | 95.54                 |
| 05095              | Monroe, AR                | -0.033               | 45.53                     | 85.16                 |
| 05097              | Montgomery, AR            | 0.07                 | 73.67                     | 70                    |
| 05099              | Nevada, AR                | 0.19                 | 91.72                     | 88.41                 |
| 05101              | Newton, AR                | 0.014                | 59.09                     | 28.15                 |
| 05103              | Ouachita, AR              | 0.05                 | 68.51                     | 86.56                 |
| 05105              | Perry, AR                 | 0.231                | 95.1                      | 63.6                  |
| 05107              | Phillips, AR              | 0.028                | 62.72                     | 92.39                 |
| 05109              | Pike, AR                  | 0.064                | 72.08                     | 71.24                 |
| 05111              | Poinsett, AR              | 0.157                | 88.22                     | 82.68                 |
| 05113              | Polk, AR                  | 0.192                | 91.98                     | 89.49                 |
| 05115              | Pope, AR                  | 0.033                | 64.25                     | 79.36                 |
| 05117              | Prairie, AR               | 0.112                | 81.66                     | 65.48                 |
| 05119              | Pulaski, AR               | -0.187               | 5.83                      | 62.87                 |
| 05121              | Randolph, AR              | 0.048                | 68                        | 71.66                 |
| 05123              | St. Francis, AR           | 0.18                 | 90.86                     | 96.91                 |
| 05125              | Saline, AR                | -0.039               | 43.52                     | 33.25                 |
| 05127              | Scott, AR                 | 0.251                | 96.24                     | 88.73                 |
| 05129              | Searcy, AR                | 0.019                | 60.46                     | 43.76                 |
| 05131              | Sebastian, AR             | -0.047               | 40.81                     | 83.28                 |
| 05133              | Sevier, AR                | 0.255                | 96.37                     | 76.75                 |
| 05135              | Sharp, AR                 | 0.036                | 65.08                     | 61.91                 |
| 05137              | Stone, AR                 | 0.073                | 74.31                     | 51.02                 |
| 05139              | Union, AR                 | 0.146                | 86.79                     | 80.54                 |
| 05141              | Van Buren, AR             | 0.047                | 67.59                     | 72.26                 |
| 05143              | Washington, AR            | -0.064               | 35.69                     | 67.45                 |
| 05145              | White, AR                 | 0.056                | 69.66                     | 74.46                 |
| 05147              | Woodruff, AR              | 0.009                | 57.4                      | 84.9                  |
| 05149              | Yell, AR                  | 0.096                | 78.61                     | 87.83                 |
| 06001              | Alameda, CA               | -0.128               | 16.43                     | 47.01                 |
| 06003              | Alpine, CA                | -0.127               | 16.62                     | 72.87                 |
| 06005              | Amador, CA                | -0.048               | 40.56                     | 53.34                 |
| 06007              | Butte, CA                 | 0.004                | 55.84                     | 80.64                 |
| 06009              | Calaveras, CA             | -0.16                | 9.39                      | 23.5                  |
| 06011              | Colusa, CA                | -0.08                | 31.26                     | 74.36                 |
| 06013              | Contra Costa, CA          | -0.175               | 7.2                       | 40.57                 |
| 06015              | Del Norte, CA             | 0.229                | 95.03                     | 97.13                 |
| 06017              | El Dorado, CA             | -0.125               | 17.26                     | 18.38                 |
| 06019              | Fresno, CA                | 0.107                | 80.74                     | 96.11                 |
| 06021              | Glenn, CA                 | -0.022               | 48.49                     | 88.95                 |
| 06023              | Humboldt, CA              | 0.023                | 61.83                     | 76.05                 |
| 06025              | Imperial, CA              | 0.181                | 90.93                     | 99.78                 |
| 06027              | Inyo, CA                  | -0.061               | 36.52                     | 57.01                 |
| 06029              | Kern, CA                  | 0.197                | 92.42                     | 96.59                 |
| 06031              | Kings, CA                 | 0.127                | 84.08                     | 97.07                 |
| 06033              | Lake, CA                  | 0.042                | 66.64                     | 91.78                 |
| 06035              | Lassen, CA                | 0.134                | 85.23                     | 59.97                 |
| 06037              | Los Angeles, CA           | -0.059               | 37.28                     | 76.82                 |
| 06039              | Madera, CA                | 0.144                | 86.37                     | 95.41                 |
| 06041              | Marin, CA                 | -0.257               | 1.53                      | 27.01                 |
| 06043              | Mariposa, CA              | -0.036               | 44.25                     | 52.93                 |
| 06045              | Mendocino, CA             | 0.014                | 58.99                     | 88.18                 |
| 06047              | Merced, CA                | 0.177                | 90.61                     | 97.17                 |
| 06049              | Modoc, CA                 | 0.005                | 55.97                     | 75.16                 |

| <b>County FIPS</b> | <b>County Description</b> | <b>DOS-SVI Index</b> | <b>DOS-SVI Percentile</b> | <b>SVI Percentile</b> |
|--------------------|---------------------------|----------------------|---------------------------|-----------------------|
| 06051              | Mono, CA                  | -0.245               | 2.04                      | 14.08                 |
| 06053              | Monterey, CA              | 0.109                | 81.25                     | 79.9                  |
| 06055              | Napa, CA                  | -0.103               | 23.85                     | 50.51                 |
| 06057              | Nevada, CA                | -0.169               | 8.02                      | 20.45                 |
| 06059              | Orange, CA                | -0.098               | 25.31                     | 41.91                 |
| 06061              | Placer, CA                | -0.163               | 8.85                      | 15.19                 |
| 06063              | Plumas, CA                | -0.143               | 12.99                     | 26.53                 |
| 06065              | Riverside, CA             | 0.037                | 65.39                     | 79.39                 |
| 06067              | Sacramento, CA            | -0.102               | 24.13                     | 73.38                 |
| 06069              | San Benito, CA            | 0.029                | 63.29                     | 52.45                 |
| 06071              | San Bernardino, CA        | 0.113                | 81.79                     | 90.1                  |
| 06073              | San Diego, CA             | -0.12                | 18.98                     | 55.96                 |
| 06075              | San Francisco, CA         | -0.217               | 3.66                      | 39.11                 |
| 06077              | San Joaquin, CA           | 0.038                | 65.49                     | 88.92                 |
| 06079              | San Luis Obispo, CA       | -0.114               | 20.73                     | 37.39                 |
| 06081              | San Mateo, CA             | -0.176               | 7.04                      | 26.5                  |
| 06083              | Santa Barbara, CA         | 0.041                | 66.25                     | 71.11                 |
| 06085              | Santa Clara, CA           | -0.151               | 11.21                     | 35.57                 |
| 06087              | Santa Cruz, CA            | -0.013               | 51.1                      | 54.3                  |
| 06089              | Shasta, CA                | 0.009                | 57.21                     | 70.22                 |
| 06091              | Sierra, CA                | -0.223               | 3.28                      | 4.52                  |
| 06093              | Siskiyou, CA              | -0.006               | 53.01                     | 72.23                 |
| 06095              | Solano, CA                | -0.097               | 25.6                      | 59.11                 |
| 06097              | Sonoma, CA                | -0.12                | 18.82                     | 40.35                 |
| 06099              | Stanislaus, CA            | 0.046                | 67.49                     | 86.75                 |
| 06101              | Sutter, CA                | -0.01                | 51.89                     | 88.22                 |
| 06103              | Tehama, CA                | 0.159                | 88.63                     | 96.24                 |
| 06105              | Trinity, CA               | -0.003               | 53.61                     | 74.11                 |
| 06107              | Tulare, CA                | 0.155                | 87.93                     | 94.17                 |
| 06109              | Tuolumne, CA              | -0.041               | 42.85                     | 46.88                 |
| 06111              | Ventura, CA               | -0.095               | 26.39                     | 48.28                 |
| 06113              | Yolo, CA                  | -0.055               | 38.49                     | 67.68                 |
| 06115              | Yuba, CA                  | 0.177                | 90.64                     | 94.2                  |
| 08001              | Adams, CO                 | -0.07                | 33.97                     | 58.92                 |
| 08003              | Alamosa, CO               | 0.136                | 85.51                     | 94.52                 |
| 08005              | Arapahoe, CO              | -0.256               | 1.62                      | 26.62                 |
| 08007              | Archuleta, CO             | -0.051               | 39.86                     | 25.7                  |
| 08009              | Baca, CO                  | -0.081               | 30.79                     | 60.86                 |
| 08011              | Bent, CO                  | 0.199                | 92.65                     | 89.81                 |
| 08013              | Boulder, CO               | -0.222               | 3.38                      | 17.04                 |
| 08014              | Broomfield, CO            | -0.256               | 1.69                      | 4.9                   |
| 08015              | Chaffee, CO               | -0.138               | 14.29                     | 23.89                 |
| 08017              | Cheyenne, CO              | 0.146                | 86.63                     | 25.89                 |
| 08019              | Clear Creek, CO           | -0.235               | 2.61                      | 1.97                  |
| 08021              | Conejos, CO               | 0.16                 | 88.7                      | 93.25                 |
| 08023              | Costilla, CO              | -0.071               | 33.59                     | 93.79                 |
| 08025              | Crowley, CO               | 0.222                | 94.65                     | 89.3                  |
| 08027              | Custer, CO                | -0.145               | 12.67                     | 24.33                 |
| 08029              | Delta, CO                 | 0.037                | 65.14                     | 68.66                 |
| 08031              | Denver, CO                | -0.34                | 0.45                      | 41.97                 |
| 08033              | Dolores, CO               | -0.091               | 27.86                     | 15.16                 |
| 08035              | Douglas, CO               | -0.181               | 6.53                      | 1.5                   |
| 08037              | Eagle, CO                 | -0.256               | 1.66                      | 13.69                 |
| 08039              | Elbert, CO                | -0.095               | 26.33                     | 0                     |
| 08041              | El Paso, CO               | -0.085               | 29.67                     | 39.27                 |

| <b>County FIPS</b> | <b>County Description</b>   | <b>DOS-SVI Index</b> | <b>DOS-SVI Percentile</b> | <b>SVI Percentile</b> |
|--------------------|-----------------------------|----------------------|---------------------------|-----------------------|
| 08043              | Fremont, CO                 | 0.045                | 67.18                     | 65.25                 |
| 08045              | Garfield, CO                | 0.048                | 67.91                     | 35.1                  |
| 08047              | Gilpin, CO                  | -0.182               | 6.34                      | 0.22                  |
| 08049              | Grand, CO                   | -0.191               | 5.57                      | 9.87                  |
| 08051              | Gunnison, CO                | -0.096               | 26.14                     | 13.92                 |
| 08053              | Hinsdale, CO                | -0.117               | 19.8                      | 6.24                  |
| 08055              | Huerfano, CO                | -0.115               | 20.47                     | 59.55                 |
| 08057              | Jackson, CO                 | -0.094               | 26.74                     | 11.37                 |
| 08059              | Jefferson, CO               | -0.252               | 1.85                      | 6.27                  |
| 08061              | Kiowa, CO                   | -0.022               | 48.65                     | 31.88                 |
| 08063              | Kit Carson, CO              | -0.085               | 29.7                      | 51.53                 |
| 08065              | Lake, CO                    | -0.094               | 26.77                     | 44.52                 |
| 08067              | La Plata, CO                | -0.081               | 30.82                     | 10.86                 |
| 08069              | Larimer, CO                 | -0.161               | 9.3                       | 11.94                 |
| 08071              | Las Animas, CO              | -0.036               | 44.38                     | 83.73                 |
| 08073              | Lincoln, CO                 | 0.163                | 89.21                     | 48.57                 |
| 08075              | Logan, CO                   | -0.011               | 51.77                     | 62.8                  |
| 08077              | Mesa, CO                    | -0.035               | 44.86                     | 57.55                 |
| 08079              | Mineral, CO                 | -0.341               | 0.41                      | 2.61                  |
| 08081              | Moffat, CO                  | -0.02                | 49.16                     | 54.71                 |
| 08083              | Montezuma, CO               | 0.02                 | 60.62                     | 49.46                 |
| 08085              | Montrose, CO                | 0.005                | 56.22                     | 71.53                 |
| 08087              | Morgan, CO                  | -0.068               | 34.54                     | 74.14                 |
| 08089              | Otero, CO                   | -0.08                | 31.39                     | 95.61                 |
| 08091              | Ouray, CO                   | -0.201               | 4.71                      | 2.39                  |
| 08093              | Park, CO                    | -0.121               | 18.53                     | 0.06                  |
| 08095              | Phillips, CO                | 0.015                | 59.38                     | 29.55                 |
| 08097              | Pitkin, CO                  | -0.396               | 0.16                      | 6.56                  |
| 08099              | Prowers, CO                 | 0.059                | 70.52                     | 93.92                 |
| 08101              | Pueblo, CO                  | -0.06                | 37.09                     | 86.69                 |
| 08103              | Rio Blanco, CO              | 0.06                 | 70.74                     | 34.01                 |
| 08105              | Rio Grande, CO              | 0.11                 | 81.31                     | 95.86                 |
| 08107              | Routt, CO                   | -0.212               | 3.88                      | 6.34                  |
| 08109              | Saguache, CO                | 0.185                | 91.21                     | 80.7                  |
| 08111              | San Juan, CO                | -0.262               | 1.43                      | 12.83                 |
| 08113              | San Miguel, CO              | -0.284               | 0.92                      | 3.31                  |
| 08115              | Sedgwick, CO                | -0.026               | 47.34                     | 69.36                 |
| 08117              | Summit, CO                  | -0.267               | 1.37                      | 7.07                  |
| 08119              | Teller, CO                  | -0.118               | 19.52                     | 7.29                  |
| 08121              | Washington, CO              | -0.017               | 50.02                     | 28.22                 |
| 08123              | Weld, CO                    | -0.035               | 44.76                     | 39.94                 |
| 08125              | Yuma, CO                    | 0.006                | 56.29                     | 56.37                 |
| 09001              | Fairfield, CT               | -0.233               | 2.71                      | 44.97                 |
| 09003              | Hartford, CT                | -0.223               | 3.31                      | 51.5                  |
| 09005              | Litchfield, CT              | -0.202               | 4.68                      | 8.18                  |
| 09007              | Middlesex, CT               | -0.235               | 2.58                      | 11.82                 |
| 09009              | New Haven, CT               | -0.182               | 6.46                      | 52.23                 |
| 09011              | New London, CT              | -0.198               | 5.16                      | 35.61                 |
| 09013              | Tolland, CT                 | -0.147               | 12.32                     | 6.94                  |
| 09015              | Windham, CT                 | -0.108               | 22                        | 42.32                 |
| 10001              | Kent, DE                    | -0.072               | 33.37                     | 72.68                 |
| 10003              | New Castle, DE              | -0.209               | 4.04                      | 37.61                 |
| 10005              | Sussex, DE                  | -0.16                | 9.42                      | 40.19                 |
| 11001              | District of Columbia,<br>DC | -0.16                | 9.55                      | 59.65                 |



| <b>County FIPS</b> | <b>County Description</b> | <b>DOS-SVI Index</b> | <b>DOS-SVI Percentile</b> | <b>SVI Percentile</b> |
|--------------------|---------------------------|----------------------|---------------------------|-----------------------|
| 12001              | Alachua, FL               | -0.143               | 13.28                     | 47.29                 |
| 12003              | Baker, FL                 | 0.212                | 93.86                     | 68.03                 |
| 12005              | Bay, FL                   | -0.13                | 16.05                     | 60.76                 |
| 12007              | Bradford, FL              | 0.18                 | 90.8                      | 92.64                 |
| 12009              | Brevard, FL               | -0.214               | 3.79                      | 37.13                 |
| 12011              | Broward, FL               | -0.356               | 0.32                      | 58.44                 |
| 12013              | Calhoun, FL               | 0.293                | 97.36                     | 84.01                 |
| 12015              | Charlotte, FL             | -0.277               | 1.08                      | 48.89                 |
| 12017              | Citrus, FL                | -0.098               | 25.41                     | 60.22                 |
| 12019              | Clay, FL                  | -0.05                | 40.05                     | 38.03                 |
| 12021              | Collier, FL               | -0.447               | 0.13                      | 46.18                 |
| 12023              | Columbia, FL              | 0.218                | 94.3                      | 85.96                 |
| 12027              | DeSoto, FL                | 0.103                | 80.17                     | 96.18                 |
| 12029              | Dixie, FL                 | 0.347                | 98.47                     | 89.94                 |
| 12031              | Duval, FL                 | -0.167               | 8.34                      | 69.2                  |
| 12033              | Escambia, FL              | -0.086               | 29.32                     | 48.63                 |
| 12035              | Flagler, FL               | -0.266               | 1.4                       | 27.99                 |
| 12037              | Franklin, FL              | 0.125                | 83.95                     | 80.83                 |
| 12039              | Gadsden, FL               | 0.149                | 87.04                     | 99.01                 |
| 12041              | Gilchrist, FL             | 0.179                | 90.73                     | 75.67                 |
| 12043              | Glades, FL                | 0.144                | 86.41                     | 90.48                 |
| 12045              | Gulf, FL                  | 0.039                | 65.71                     | 59.2                  |
| 12047              | Hamilton, FL              | 0.4                  | 98.76                     | 99.08                 |
| 12049              | Hardee, FL                | 0.285                | 97.33                     | 98.31                 |
| 12051              | Hendry, FL                | 0.197                | 92.45                     | 99.39                 |
| 12053              | Hernando, FL              | -0.104               | 23.21                     | 54.9                  |
| 12055              | Highlands, FL             | -0.028               | 46.64                     | 87.29                 |
| 12057              | Hillsborough, FL          | -0.188               | 5.76                      | 67.01                 |
| 12059              | Holmes, FL                | 0.233                | 95.29                     | 93.47                 |
| 12061              | Indian River, FL          | -0.28                | 0.99                      | 39.62                 |
| 12063              | Jackson, FL               | 0.242                | 95.77                     | 95.83                 |
| 12065              | Jefferson, FL             | 0.087                | 76.92                     | 57.48                 |
| 12067              | Lafayette, FL             | 0.48                 | 99.24                     | 98.06                 |
| 12069              | Lake, FL                  | -0.098               | 25.28                     | 60.29                 |
| 12071              | Lee, FL                   | -0.303               | 0.6                       | 55.25                 |
| 12073              | Leon, FL                  | -0.149               | 12                        | 49.43                 |
| 12075              | Levy, FL                  | 0.152                | 87.39                     | 77.93                 |
| 12077              | Liberty, FL               | 0.277                | 97.1                      | 83.34                 |
| 12079              | Madison, FL               | 0.278                | 97.14                     | 96.08                 |
| 12081              | Manatee, FL               | -0.207               | 4.11                      | 51.97                 |
| 12083              | Marion, FL                | -0.055               | 38.71                     | 75.35                 |
| 12085              | Martin, FL                | -0.287               | 0.86                      | 39.9                  |
| 12086              | Miami-Dade, FL            | -0.472               | 0.03                      | 81.75                 |
| 12087              | Monroe, FL                | -0.215               | 3.73                      | 45.57                 |
| 12089              | Nassau, FL                | -0.126               | 17.03                     | 24.59                 |
| 12091              | Okaloosa, FL              | -0.152               | 11.05                     | 38.6                  |
| 12093              | Okeechobee, FL            | 0.173                | 90.26                     | 94.65                 |
| 12095              | Orange, FL                | -0.244               | 2.13                      | 66.91                 |
| 12097              | Osceola, FL               | -0.177               | 6.88                      | 81.78                 |
| 12099              | Palm Beach, FL            | -0.358               | 0.29                      | 55.92                 |
| 12101              | Pasco, FL                 | -0.075               | 32.57                     | 63.44                 |
| 12103              | Pinellas, FL              | -0.289               | 0.76                      | 51.69                 |
| 12105              | Polk, FL                  | 0.005                | 56.1                      | 90.35                 |
| 12107              | Putnam, FL                | 0.192                | 91.91                     | 95.25                 |
| 12109              | St. Johns, FL             | -0.2                 | 5                         | 7.61                  |

| <b>County FIPS</b> | <b>County Description</b> | <b>DOS-SVI Index</b> | <b>DOS-SVI Percentile</b> | <b>SVI Percentile</b> |
|--------------------|---------------------------|----------------------|---------------------------|-----------------------|
| 12111              | St. Lucie, FL             | -0.194               | 5.29                      | 71.85                 |
| 12113              | Santa Rosa, FL            | -0.044               | 42.09                     | 30.96                 |
| 12115              | Sarasota, FL              | -0.378               | 0.22                      | 25.38                 |
| 12117              | Seminole, FL              | -0.226               | 3.02                      | 18.44                 |
| 12119              | Sumter, FL                | -0.376               | 0.26                      | 23.6                  |
| 12121              | Suwannee, FL              | 0.214                | 93.92                     | 94.24                 |
| 12123              | Taylor, FL                | 0.296                | 97.42                     | 89.84                 |
| 12125              | Union, FL                 | 0.415                | 98.85                     | 83.82                 |
| 12127              | Volusia, FL               | -0.221               | 3.47                      | 53.47                 |
| 12129              | Wakulla, FL               | 0.138                | 85.7                      | 40.32                 |
| 12131              | Walton, FL                | -0.114               | 20.76                     | 58.22                 |
| 12133              | Washington, FL            | 0.231                | 95.16                     | 89.39                 |
| 13001              | Appling, GA               | 0.198                | 92.55                     | 96.69                 |
| 13003              | Atkinson, GA              | 0.208                | 93.44                     | 96.15                 |
| 13005              | Bacon, GA                 | 0.182                | 91.02                     | 93.89                 |
| 13007              | Baker, GA                 | 0.151                | 87.17                     | 74.24                 |
| 13009              | Baldwin, GA               | 0.079                | 75.58                     | 86.66                 |
| 13011              | Banks, GA                 | 0.131                | 84.72                     | 55.86                 |
| 13013              | Barrow, GA                | -0.021               | 48.9                      | 42.04                 |
| 13015              | Bartow, GA                | 0.002                | 55.27                     | 59.14                 |
| 13017              | Ben Hill, GA              | 0.079                | 75.52                     | 87.26                 |
| 13019              | Berrien, GA               | 0.235                | 95.38                     | 85                    |
| 13021              | Bibb, GA                  | -0.058               | 37.7                      | 91.75                 |
| 13023              | Bleckley, GA              | 0.125                | 83.89                     | 73.95                 |
| 13025              | Brantley, GA              | 0.318                | 97.93                     | 62.29                 |
| 13027              | Brooks, GA                | 0.138                | 85.77                     | 83.98                 |
| 13029              | Bryan, GA                 | -0.005               | 53.2                      | 33.89                 |
| 13031              | Bulloch, GA               | 0.065                | 72.36                     | 81.21                 |
| 13033              | Burke, GA                 | 0.187                | 91.56                     | 84.55                 |
| 13035              | Butts, GA                 | 0.107                | 80.8                      | 76.53                 |
| 13037              | Calhoun, GA               | 0.274                | 97.01                     | 97.74                 |
| 13039              | Camden, GA                | 0.002                | 55.2                      | 51.59                 |
| 13043              | Candler, GA               | 0.247                | 96.05                     | 98.28                 |
| 13045              | Carroll, GA               | 0.009                | 57.56                     | 78.25                 |
| 13047              | Catoosa, GA               | -0.02                | 49.06                     | 13.18                 |
| 13049              | Charlton, GA              | 0.217                | 94.17                     | 87.52                 |
| 13051              | Chatham, GA               | -0.143               | 13.09                     | 69.49                 |
| 13053              | Chattahoochee, GA         | 0.346                | 98.41                     | 63.79                 |
| 13055              | Chattooga, GA             | 0.333                | 98.25                     | 92.52                 |
| 13057              | Cherokee, GA              | -0.115               | 20.5                      | 11.85                 |
| 13059              | Clarke, GA                | -0.093               | 27.19                     | 76.75                 |
| 13061              | Clay, GA                  | 0.227                | 95                        | 93.09                 |
| 13063              | Clayton, GA               | -0.118               | 19.45                     | 91.02                 |
| 13065              | Clinch, GA                | 0.318                | 97.96                     | 97.77                 |
| 13067              | Cobb, GA                  | -0.254               | 1.75                      | 26.69                 |
| 13069              | Coffee, GA                | 0.188                | 91.63                     | 95.06                 |
| 13071              | Colquitt, GA              | 0.132                | 84.75                     | 98.12                 |
| 13073              | Columbia, GA              | -0.109               | 21.75                     | 13.34                 |
| 13075              | Cook, GA                  | 0.171                | 90.13                     | 85.1                  |
| 13077              | Coweta, GA                | -0.116               | 19.96                     | 24.27                 |
| 13079              | Crawford, GA              | 0.217                | 94.08                     | 68.15                 |
| 13081              | Crisp, GA                 | 0.157                | 88.16                     | 98.57                 |
| 13083              | Dade, GA                  | 0.14                 | 86.09                     | 51.56                 |
| 13085              | Dawson, GA                | -0.049               | 40.27                     | 10.38                 |
| 13087              | Decatur, GA               | 0.225                | 94.87                     | 94.55                 |

| <b>County FIPS</b> | <b>County Description</b> | <b>DOS-SVI Index</b> | <b>DOS-SVI Percentile</b> | <b>SVI Percentile</b> |
|--------------------|---------------------------|----------------------|---------------------------|-----------------------|
| 13089              | DeKalb, GA                | -0.269               | 1.24                      | 66.11                 |
| 13091              | Dodge, GA                 | 0.165                | 89.37                     | 92.23                 |
| 13093              | Dooly, GA                 | 0.145                | 86.53                     | 94.84                 |
| 13095              | Dougherty, GA             | 0.021                | 61.16                     | 95.13                 |
| 13097              | Douglas, GA               | -0.136               | 14.68                     | 54.04                 |
| 13099              | Early, GA                 | 0.221                | 94.59                     | 92.01                 |
| 13101              | Echols, GA                | 0.171                | 90.03                     | 66.15                 |
| 13103              | Effingham, GA             | 0.039                | 65.74                     | 23.63                 |
| 13105              | Elbert, GA                | 0.07                 | 73.64                     | 83.38                 |
| 13107              | Emanuel, GA               | 0.139                | 85.86                     | 97.68                 |
| 13109              | Evans, GA                 | 0.151                | 87.14                     | 98.47                 |
| 13111              | Fannin, GA                | -0.088               | 28.68                     | 30.03                 |
| 13113              | Fayette, GA               | -0.201               | 4.87                      | 6.08                  |
| 13115              | Floyd, GA                 | 0.009                | 57.47                     | 88.54                 |
| 13117              | Forsyth, GA               | -0.102               | 24.04                     | 3.73                  |
| 13119              | Franklin, GA              | 0.099                | 79.15                     | 84.62                 |
| 13121              | Fulton, GA                | -0.3                 | 0.64                      | 52.68                 |
| 13123              | Gilmer, GA                | -0.028               | 46.67                     | 55.99                 |
| 13125              | Glascock, GA              | 0.322                | 98.03                     | 68.6                  |
| 13127              | Glynn, GA                 | -0.134               | 15.06                     | 71.59                 |
| 13129              | Gordon, GA                | 0.023                | 61.76                     | 88.06                 |
| 13131              | Grady, GA                 | 0.067                | 72.81                     | 92.58                 |
| 13133              | Greene, GA                | -0.182               | 6.43                      | 53.79                 |
| 13135              | Gwinnett, GA              | -0.193               | 5.44                      | 43.47                 |
| 13137              | Habersham, GA             | 0.057                | 69.85                     | 71.46                 |
| 13139              | Hall, GA                  | -0.019               | 49.48                     | 66.18                 |
| 13141              | Hancock, GA               | 0.198                | 92.58                     | 79.84                 |
| 13143              | Haralson, GA              | 0.043                | 66.76                     | 54.27                 |
| 13145              | Harris, GA                | -0.067               | 34.64                     | 13.41                 |
| 13147              | Hart, GA                  | 0.004                | 55.75                     | 71.94                 |
| 13149              | Heard, GA                 | 0.21                 | 93.76                     | 72.32                 |
| 13151              | Henry, GA                 | -0.18                | 6.56                      | 31.37                 |
| 13153              | Houston, GA               | -0.015               | 50.56                     | 56.69                 |
| 13155              | Irwin, GA                 | 0.089                | 77.46                     | 84.08                 |
| 13157              | Jackson, GA               | 0.022                | 61.41                     | 35.16                 |
| 13159              | Jasper, GA                | 0.178                | 90.67                     | 69.27                 |
| 13161              | Jeff Davis, GA            | 0.269                | 96.72                     | 93.73                 |
| 13163              | Jefferson, GA             | 0.194                | 92.14                     | 94.39                 |
| 13165              | Jenkins, GA               | 0.129                | 84.34                     | 82.83                 |
| 13167              | Johnson, GA               | 0.248                | 96.12                     | 90.61                 |
| 13169              | Jones, GA                 | 0.041                | 66.32                     | 37.93                 |
| 13171              | Lamar, GA                 | 0.096                | 78.67                     | 49.17                 |
| 13173              | Lanier, GA                | 0.144                | 86.47                     | 86.97                 |
| 13175              | Laurens, GA               | 0.097                | 78.86                     | 80.13                 |
| 13177              | Lee, GA                   | 0.042                | 66.48                     | 35.19                 |
| 13179              | Liberty, GA               | 0.093                | 78.03                     | 88.82                 |
| 13181              | Lincoln, GA               | 0.007                | 56.61                     | 55.64                 |
| 13183              | Long, GA                  | 0.233                | 95.32                     | 82.71                 |
| 13185              | Lowndes, GA               | 0.043                | 66.83                     | 86.62                 |
| 13187              | Lumpkin, GA               | -0.019               | 49.51                     | 43.38                 |
| 13189              | McDuffie, GA              | 0.039                | 65.78                     | 93.76                 |
| 13191              | McIntosh, GA              | -0.061               | 36.77                     | 58.63                 |
| 13193              | Macon, GA                 | 0.25                 | 96.18                     | 93.12                 |
| 13195              | Madison, GA               | 0.134                | 85.13                     | 64.17                 |
| 13197              | Marion, GA                | 0.07                 | 73.7                      | 85.19                 |

| <b>County FIPS</b> | <b>County Description</b> | <b>DOS-SVI Index</b> | <b>DOS-SVI Percentile</b> | <b>SVI Percentile</b> |
|--------------------|---------------------------|----------------------|---------------------------|-----------------------|
| 13199              | Meriwether, GA            | 0.033                | 64.28                     | 87.01                 |
| 13201              | Miller, GA                | 0.239                | 95.64                     | 77.99                 |
| 13205              | Mitchell, GA              | 0.213                | 93.89                     | 98.79                 |
| 13207              | Monroe, GA                | 0.023                | 61.8                      | 45.96                 |
| 13209              | Montgomery, GA            | 0.184                | 91.15                     | 84.65                 |
| 13211              | Morgan, GA                | -0.06                | 36.93                     | 24.46                 |
| 13213              | Murray, GA                | 0.223                | 94.75                     | 71.34                 |
| 13215              | Muscogee, GA              | -0.082               | 30.53                     | 90.03                 |
| 13217              | Newton, GA                | -0.029               | 46.45                     | 70.7                  |
| 13219              | Oconee, GA                | -0.081               | 31.17                     | 3.54                  |
| 13221              | Oglethorpe, GA            | 0.049                | 68.1                      | 52.17                 |
| 13223              | Paulding, GA              | -0.046               | 41.16                     | 13.76                 |
| 13225              | Peach, GA                 | 0.023                | 61.64                     | 94.04                 |
| 13227              | Pickens, GA               | 0.009                | 57.18                     | 27.96                 |
| 13229              | Pierce, GA                | 0.07                 | 73.58                     | 65.7                  |
| 13231              | Pike, GA                  | 0.071                | 73.77                     | 15.1                  |
| 13233              | Polk, GA                  | 0.049                | 68.26                     | 80.48                 |
| 13235              | Pulaski, GA               | -0.016               | 50.27                     | 84.59                 |
| 13237              | Putnam, GA                | -0.07                | 34.03                     | 42.8                  |
| 13239              | Quitman, GA               | 0.217                | 94.11                     | 94.33                 |
| 13241              | Rabun, GA                 | -0.09                | 28.14                     | 53.41                 |
| 13243              | Randolph, GA              | 0.196                | 92.33                     | 97.39                 |
| 13245              | Richmond, GA              | -0.016               | 50.4                      | 93.28                 |
| 13247              | Rockdale, GA              | -0.163               | 8.88                      | 55.29                 |
| 13249              | Schley, GA                | 0.185                | 91.28                     | 82.48                 |
| 13251              | Screven, GA               | 0.189                | 91.69                     | 85.25                 |
| 13253              | Seminole, GA              | 0.153                | 87.46                     | 83.44                 |
| 13255              | Spalding, GA              | -0.005               | 53.3                      | 86.91                 |
| 13257              | Stephens, GA              | 0.153                | 87.58                     | 79.68                 |
| 13259              | Stewart, GA               | 0.158                | 88.44                     | 92.45                 |
| 13261              | Sumter, GA                | 0.068                | 73.1                      | 97.64                 |
| 13263              | Talbot, GA                | 0.075                | 74.94                     | 85.89                 |
| 13265              | Taliaferro, GA            | 0.084                | 76.28                     | 90.89                 |
| 13267              | Tattall, GA               | 0.32                 | 97.99                     | 90.8                  |
| 13269              | Taylor, GA                | 0.224                | 94.78                     | 91.97                 |
| 13271              | Telfair, GA               | 0.054                | 69.18                     | 83.69                 |
| 13273              | Terrell, GA               | 0.087                | 76.95                     | 95.7                  |
| 13275              | Thomas, GA                | 0.046                | 67.37                     | 91.08                 |
| 13277              | Tift, GA                  | 0.094                | 78.19                     | 88.09                 |
| 13279              | Toombs, GA                | 0.172                | 90.16                     | 97.61                 |
| 13281              | Towns, GA                 | -0.169               | 8.15                      | 32.58                 |
| 13283              | Treutlen, GA              | 0.202                | 92.96                     | 94.71                 |
| 13285              | Troup, GA                 | -0.024               | 47.79                     | 90.13                 |
| 13287              | Turner, GA                | 0.061                | 71.28                     | 98.09                 |
| 13289              | Twiggs, GA                | 0.054                | 69.21                     | 75.8                  |
| 13291              | Union, GA                 | -0.175               | 7.26                      | 31.15                 |
| 13293              | Upson, GA                 | 0.112                | 81.73                     | 85.32                 |
| 13295              | Walker, GA                | 0.036                | 65.04                     | 64.08                 |
| 13297              | Walton, GA                | -0.037               | 44.19                     | 29.3                  |
| 13299              | Ware, GA                  | 0.065                | 72.4                      | 84.49                 |
| 13301              | Warren, GA                | 0.078                | 75.39                     | 89.46                 |
| 13303              | Washington, GA            | 0.164                | 89.27                     | 94.62                 |
| 13305              | Wayne, GA                 | 0.263                | 96.59                     | 91.66                 |
| 13307              | Webster, GA               | -0.002               | 54.25                     | 78.76                 |
| 13309              | Wheeler, GA               | 0.43                 | 98.98                     | 81.24                 |

| <b>County FIPS</b> | <b>County Description</b> | <b>DOS-SVI Index</b> | <b>DOS-SVI Percentile</b> | <b>SVI Percentile</b> |
|--------------------|---------------------------|----------------------|---------------------------|-----------------------|
| 13311              | White, GA                 | -0.043               | 42.38                     | 23.57                 |
| 13313              | Whitfield, GA             | 0.089                | 77.33                     | 87.93                 |
| 13315              | Wilcox, GA                | 0.242                | 95.73                     | 81.69                 |
| 13317              | Wilkes, GA                | -0.067               | 34.83                     | 75.61                 |
| 13319              | Wilkinson, GA             | 0.151                | 87.23                     | 78.73                 |
| 13321              | Worth, GA                 | 0.009                | 57.53                     | 73.57                 |
| 15001              | Hawaii, HI                | -0.043               | 42.5                      | 57.71                 |
| 15003              | Honolulu, HI              | -0.091               | 27.83                     | 47.2                  |
| 15005              | Kalawao, HI               | -0.191               | 5.54                      | 31.62                 |
| 15007              | Kauai, HI                 | -0.054               | 38.87                     | 30.99                 |
| 15009              | Maui, HI                  | 0.001                | 54.92                     | 38.79                 |
| 16001              | Ada, ID                   | -0.105               | 23.18                     | 13.73                 |
| 16003              | Adams, ID                 | -0.016               | 50.3                      | 29.36                 |
| 16005              | Bannock, ID               | 0.07                 | 73.51                     | 57.9                  |
| 16007              | Bear Lake, ID             | -0.001               | 54.47                     | 21.43                 |
| 16009              | Benewah, ID               | 0.201                | 92.81                     | 73.34                 |
| 16011              | Bingham, ID               | 0.119                | 82.87                     | 50.7                  |
| 16013              | Blaine, ID                | -0.257               | 1.56                      | 32.39                 |
| 16015              | Boise, ID                 | -0.08                | 31.45                     | 6.72                  |
| 16017              | Bonner, ID                | -0.068               | 34.45                     | 24.01                 |
| 16019              | Bonneville, ID            | 0.061                | 71.06                     | 36.34                 |
| 16021              | Boundary, ID              | 0.029                | 63.26                     | 30.83                 |
| 16023              | Butte, ID                 | 0.011                | 58.01                     | 24.62                 |
| 16025              | Camas, ID                 | -0.048               | 40.53                     | 13.38                 |
| 16027              | Canyon, ID                | 0.114                | 82.08                     | 73.66                 |
| 16029              | Caribou, ID               | 0.097                | 78.89                     | 19.17                 |
| 16031              | Cassia, ID                | 0.062                | 71.51                     | 67.32                 |
| 16033              | Clark, ID                 | 0.326                | 98.15                     | 89.11                 |
| 16035              | Clearwater, ID            | 0.017                | 60.05                     | 44.01                 |
| 16037              | Custer, ID                | -0.124               | 17.57                     | 43.69                 |
| 16039              | Elmore, ID                | 0.035                | 64.76                     | 58.82                 |
| 16041              | Franklin, ID              | 0.152                | 87.36                     | 14.14                 |
| 16043              | Fremont, ID               | 0.174                | 90.35                     | 51.37                 |
| 16045              | Gem, ID                   | -0.028               | 46.83                     | 66.27                 |
| 16047              | Gooding, ID               | 0.103                | 80.07                     | 70.76                 |
| 16049              | Idaho, ID                 | 0.095                | 78.35                     | 53.92                 |
| 16051              | Jefferson, ID             | 0.219                | 94.52                     | 25.25                 |
| 16053              | Jerome, ID                | 0.094                | 78.22                     | 67.36                 |
| 16055              | Kootenai, ID              | -0.078               | 31.74                     | 23.28                 |
| 16057              | Latah, ID                 | -0.025               | 47.53                     | 24.84                 |
| 16059              | Lemhi, ID                 | 0.013                | 58.84                     | 29.97                 |
| 16061              | Lewis, ID                 | 0.074                | 74.72                     | 56.78                 |
| 16063              | Lincoln, ID               | 0.207                | 93.35                     | 55.76                 |
| 16065              | Madison, ID               | 0.232                | 95.26                     | 40.29                 |
| 16067              | Minidoka, ID              | -0.054               | 38.84                     | 67.83                 |
| 16069              | Nez Perce, ID             | -0.047               | 40.91                     | 50.67                 |
| 16071              | Oneida, ID                | 0.101                | 79.56                     | 34.24                 |
| 16073              | Owyhee, ID                | 0.142                | 86.25                     | 82.45                 |
| 16075              | Payette, ID               | 0.159                | 88.51                     | 60.1                  |
| 16077              | Power, ID                 | 0.162                | 88.98                     | 51.62                 |
| 16079              | Shoshone, ID              | 0.033                | 64.31                     | 75.7                  |
| 16081              | Teton, ID                 | 0.031                | 63.67                     | 13.44                 |
| 16083              | Twin Falls, ID            | 0.018                | 60.08                     | 49.55                 |
| 16085              | Valley, ID                | -0.11                | 21.59                     | 8.82                  |
| 16087              | Washington, ID            | -0.078               | 31.87                     | 85.06                 |

| <b>County FIPS</b> | <b>County Description</b> | <b>DOS-SVI Index</b> | <b>DOS-SVI Percentile</b> | <b>SVI Percentile</b> |
|--------------------|---------------------------|----------------------|---------------------------|-----------------------|
| 17001              | Adams, IL                 | -0.085               | 29.74                     | 24.9                  |
| 17003              | Alexander, IL             | -0.053               | 39.32                     | 95.73                 |
| 17005              | Bond, IL                  | 0.107                | 80.83                     | 37.32                 |
| 17007              | Boone, IL                 | -0.052               | 39.48                     | 46.97                 |
| 17009              | Brown, IL                 | 0.158                | 88.41                     | 47.45                 |
| 17011              | Bureau, IL                | -0.148               | 12.13                     | 28.63                 |
| 17013              | Calhoun, IL               | 0.013                | 58.87                     | 19.01                 |
| 17015              | Carroll, IL               | -0.133               | 15.28                     | 16.82                 |
| 17017              | Cass, IL                  | -0.055               | 38.78                     | 69.71                 |
| 17019              | Champaign, IL             | -0.02                | 49.32                     | 49.9                  |
| 17021              | Christian, IL             | -0.095               | 26.55                     | 24.08                 |
| 17023              | Clark, IL                 | -0.045               | 41.58                     | 20.73                 |
| 17025              | Clay, IL                  | 0.043                | 66.79                     | 61.15                 |
| 17027              | Clinton, IL               | -0.018               | 49.86                     | 17.87                 |
| 17029              | Coles, IL                 | -0.096               | 25.91                     | 49.78                 |
| 17031              | Cook, IL                  | -0.162               | 9.01                      | 67.55                 |
| 17033              | Crawford, IL              | 0.001                | 54.79                     | 38.38                 |
| 17035              | Cumberland, IL            | -0.001               | 54.51                     | 16.27                 |
| 17037              | DeKalb, IL                | -0.104               | 23.43                     | 48.66                 |
| 17039              | De Witt, IL               | -0.077               | 32.09                     | 12.9                  |
| 17041              | Douglas, IL               | 0.058                | 70.14                     | 44.39                 |
| 17043              | DuPage, IL                | -0.236               | 2.36                      | 16.11                 |
| 17045              | Edgar, IL                 | -0.099               | 24.8                      | 34.33                 |
| 17047              | Edwards, IL               | 0.033                | 64.37                     | 24.43                 |
| 17049              | Effingham, IL             | -0.031               | 46.1                      | 19.9                  |
| 17051              | Fayette, IL               | 0.062                | 71.54                     | 59.49                 |
| 17053              | Ford, IL                  | -0.098               | 25.15                     | 30.51                 |
| 17055              | Franklin, IL              | 0.034                | 64.53                     | 60.92                 |
| 17057              | Fulton, IL                | -0.076               | 32.35                     | 57.61                 |
| 17059              | Gallatin, IL              | -0.066               | 35.05                     | 45.38                 |
| 17061              | Greene, IL                | -0.026               | 47.47                     | 19.52                 |
| 17063              | Grundy, IL                | -0.069               | 34.32                     | 8.44                  |
| 17065              | Hamilton, IL              | -0.03                | 46.26                     | 15.29                 |
| 17067              | Hancock, IL               | -0.063               | 35.94                     | 12.32                 |
| 17069              | Hardin, IL                | 0.15                 | 87.11                     | 50.19                 |
| 17071              | Henderson, IL             | -0.107               | 22.41                     | 6.69                  |
| 17073              | Henry, IL                 | -0.122               | 18.21                     | 20.1                  |
| 17075              | Iroquois, IL              | -0.073               | 33.11                     | 34.04                 |
| 17077              | Jackson, IL               | -0.023               | 48.23                     | 70.45                 |
| 17079              | Jasper, IL                | 0.032                | 63.99                     | 24.17                 |
| 17081              | Jefferson, IL             | 0.031                | 63.77                     | 81.08                 |
| 17083              | Jersey, IL                | -0.056               | 38.36                     | 10.41                 |
| 17085              | Jo Daviess, IL            | -0.158               | 9.9                       | 5.25                  |
| 17087              | Johnson, IL               | 0.104                | 80.26                     | 46.24                 |
| 17089              | Kane, IL                  | -0.118               | 19.42                     | 41.69                 |
| 17091              | Kankakee, IL              | -0.037               | 44.13                     | 66.56                 |
| 17093              | Kendall, IL               | -0.087               | 28.88                     | 13.98                 |
| 17095              | Knox, IL                  | -0.046               | 41.23                     | 64.62                 |
| 17097              | Lake, IL                  | -0.18                | 6.65                      | 35.13                 |
| 17099              | LaSalle, IL               | -0.086               | 29.39                     | 43.03                 |
| 17101              | Lawrence, IL              | 0.118                | 82.52                     | 77.83                 |
| 17103              | Lee, IL                   | -0.059               | 37.38                     | 30.1                  |
| 17105              | Livingston, IL            | -0.054               | 39                        | 48.41                 |
| 17107              | Logan, IL                 | -0.02                | 49.25                     | 22.71                 |
| 17109              | McDonough, IL             | -0.014               | 50.72                     | 51.66                 |

| <b>County FIPS</b> | <b>County Description</b> | <b>DOS-SVI Index</b> | <b>DOS-SVI Percentile</b> | <b>SVI Percentile</b> |
|--------------------|---------------------------|----------------------|---------------------------|-----------------------|
| 17111              | McHenry, IL               | -0.13                | 16.08                     | 7.01                  |
| 17113              | McLean, IL                | -0.144               | 12.8                      | 19.04                 |
| 17115              | Macon, IL                 | -0.097               | 25.47                     | 59.71                 |
| 17117              | Macoupin, IL              | -0.044               | 42.22                     | 19.87                 |
| 17119              | Madison, IL               | -0.07                | 34                        | 29.65                 |
| 17121              | Marion, IL                | 0.055                | 69.41                     | 73.85                 |
| 17123              | Marshall, IL              | -0.117               | 19.68                     | 5.45                  |
| 17125              | Mason, IL                 | -0.057               | 37.92                     | 29.46                 |
| 17127              | Massac, IL                | 0.07                 | 73.48                     | 75.13                 |
| 17129              | Menard, IL                | -0.104               | 23.24                     | 4.84                  |
| 17131              | Mercer, IL                | -0.108               | 22.03                     | 11.34                 |
| 17133              | Monroe, IL                | -0.131               | 15.79                     | 0.16                  |
| 17135              | Montgomery, IL            | 0.022                | 61.38                     | 39.14                 |
| 17137              | Morgan, IL                | -0.072               | 33.49                     | 50.45                 |
| 17139              | Moultrie, IL              | 0.105                | 80.33                     | 29.49                 |
| 17141              | Ogle, IL                  | -0.088               | 28.75                     | 29.17                 |
| 17143              | Peoria, IL                | -0.137               | 14.45                     | 61.31                 |
| 17145              | Perry, IL                 | 0.015                | 59.47                     | 64.87                 |
| 17147              | Piatt, IL                 | -0.136               | 14.64                     | 0.32                  |
| 17149              | Pike, IL                  | -0.01                | 51.93                     | 34.94                 |
| 17151              | Pope, IL                  | 0.063                | 71.57                     | 45.45                 |
| 17153              | Pulaski, IL               | 0.09                 | 77.49                     | 69.43                 |
| 17155              | Putnam, IL                | -0.176               | 7.07                      | 2.77                  |
| 17157              | Randolph, IL              | 0.011                | 58.23                     | 45.67                 |
| 17159              | Richland, IL              | -0.043               | 42.34                     | 41.05                 |
| 17161              | Rock Island, IL           | -0.144               | 12.86                     | 71.37                 |
| 17163              | St. Clair, IL             | -0.077               | 32.06                     | 52.29                 |
| 17165              | Saline, IL                | 0.044                | 66.95                     | 86.37                 |
| 17167              | Sangamon, IL              | -0.103               | 23.56                     | 43.57                 |
| 17169              | Schuyler, IL              | -0.062               | 36.42                     | 57.07                 |
| 17171              | Scott, IL                 | 0.006                | 56.35                     | 13.54                 |
| 17173              | Shelby, IL                | -0.027               | 46.9                      | 8.5                   |
| 17175              | Stark, IL                 | -0.128               | 16.46                     | 6.34                  |
| 17177              | Stephenson, IL            | -0.157               | 10.19                     | 50                    |
| 17179              | Tazewell, IL              | -0.105               | 22.73                     | 10.7                  |
| 17181              | Union, IL                 | 0.037                | 65.3                      | 68.44                 |
| 17183              | Vermilion, IL             | -0.02                | 49.09                     | 81.31                 |
| 17185              | Wabash, IL                | -0.033               | 45.62                     | 32.07                 |
| 17187              | Warren, IL                | 0.034                | 64.6                      | 60.73                 |
| 17189              | Washington, IL            | -0.038               | 43.84                     | 6.53                  |
| 17191              | Wayne, IL                 | 0.066                | 72.62                     | 43.31                 |
| 17193              | White, IL                 | 0.021                | 61.19                     | 53.82                 |
| 17195              | Whiteside, IL             | -0.12                | 18.94                     | 32.83                 |
| 17197              | Will, IL                  | -0.124               | 17.83                     | 20.22                 |
| 17199              | Williamson, IL            | -0.033               | 45.56                     | 48.06                 |
| 17201              | Winnebago, IL             | -0.092               | 27.51                     | 72.04                 |
| 17203              | Woodford, IL              | -0.065               | 35.5                      | 1.88                  |
| 18001              | Adams, IN                 | 0.23                 | 95.06                     | 59.04                 |
| 18003              | Allen, IN                 | -0.113               | 20.95                     | 52.36                 |
| 18005              | Bartholomew, IN           | -0.056               | 38.3                      | 36.31                 |
| 18007              | Benton, IN                | -0.034               | 45.18                     | 33.47                 |
| 18009              | Blackford, IN             | -0.012               | 51.61                     | 37.1                  |
| 18011              | Boone, IN                 | -0.119               | 19.23                     | 4.49                  |
| 18013              | Brown, IN                 | -0.138               | 14.2                      | 6.02                  |
| 18015              | Carroll, IN               | -0.031               | 46.13                     | 11.75                 |

| <b>County FIPS</b> | <b>County Description</b> | <b>DOS-SVI Index</b> | <b>DOS-SVI Percentile</b> | <b>SVI Percentile</b> |
|--------------------|---------------------------|----------------------|---------------------------|-----------------------|
| 18017              | Cass, IN                  | -0.062               | 36.26                     | 71.97                 |
| 18019              | Clark, IN                 | -0.103               | 23.72                     | 25.48                 |
| 18021              | Clay, IN                  | -0.009               | 52.21                     | 33.38                 |
| 18023              | Clinton, IN               | -0.03                | 46.35                     | 57.1                  |
| 18025              | Crawford, IN              | 0.098                | 79.02                     | 38.89                 |
| 18027              | Daviess, IN               | 0.222                | 94.68                     | 68.82                 |
| 18029              | Dearborn, IN              | -0.089               | 28.3                      | 7.99                  |
| 18031              | Decatur, IN               | -0.053               | 39.19                     | 21.02                 |
| 18033              | DeKalb, IN                | -0.068               | 34.61                     | 23.34                 |
| 18035              | Delaware, IN              | -0.054               | 38.91                     | 56.66                 |
| 18037              | Dubois, IN                | -0.048               | 40.75                     | 20.8                  |
| 18039              | Elkhart, IN               | -0.018               | 49.92                     | 77.01                 |
| 18041              | Fayette, IN               | -0.02                | 49.12                     | 61.08                 |
| 18043              | Floyd, IN                 | -0.143               | 13.24                     | 16.69                 |
| 18045              | Fountain, IN              | -0.006               | 52.91                     | 20.32                 |
| 18047              | Franklin, IN              | -0.035               | 44.67                     | 14.71                 |
| 18049              | Fulton, IN                | -0.005               | 53.14                     | 34.59                 |
| 18051              | Gibson, IN                | 0.018                | 60.24                     | 31.5                  |
| 18053              | Grant, IN                 | -0.046               | 41.2                      | 73.31                 |
| 18055              | Greene, IN                | 0.121                | 83.19                     | 44.43                 |
| 18057              | Hamilton, IN              | -0.167               | 8.31                      | 2.55                  |
| 18059              | Hancock, IN               | -0.132               | 15.66                     | 1.69                  |
| 18061              | Harrison, IN              | 0.02                 | 60.74                     | 18.66                 |
| 18063              | Hendricks, IN             | -0.13                | 16.11                     | 8.15                  |
| 18065              | Henry, IN                 | -0.045               | 41.77                     | 37.93                 |
| 18067              | Howard, IN                | -0.124               | 17.61                     | 48.15                 |
| 18069              | Huntington, IN            | -0.031               | 45.88                     | 12.48                 |
| 18071              | Jackson, IN               | -0.021               | 48.77                     | 53.89                 |
| 18073              | Jasper, IN                | -0.034               | 45.34                     | 26.85                 |
| 18075              | Jay, IN                   | 0.112                | 81.76                     | 67.48                 |
| 18077              | Jefferson, IN             | -0.01                | 51.83                     | 44.14                 |
| 18079              | Jennings, IN              | 0.1                  | 79.53                     | 38.47                 |
| 18081              | Johnson, IN               | -0.112               | 21.2                      | 14.24                 |
| 18083              | Knox, IN                  | -0.023               | 48.36                     | 59.27                 |
| 18085              | Kosciusko, IN             | 0.002                | 55.17                     | 46.08                 |
| 18087              | LaGrange, IN              | 0.384                | 98.69                     | 37.07                 |
| 18089              | Lake, IN                  | -0.105               | 23.11                     | 72.52                 |
| 18091              | LaPorte, IN               | 0.014                | 59.06                     | 72.17                 |
| 18093              | Lawrence, IN              | -0.033               | 45.4                      | 27.52                 |
| 18095              | Madison, IN               | -0.052               | 39.57                     | 67.13                 |
| 18097              | Marion, IN                | -0.131               | 15.76                     | 79.71                 |
| 18099              | Marshall, IN              | 0.084                | 76.22                     | 57.96                 |
| 18101              | Martin, IN                | 0.007                | 56.54                     | 23.98                 |
| 18103              | Miami, IN                 | 0.041                | 66.12                     | 58.79                 |
| 18105              | Monroe, IN                | -0.096               | 26.01                     | 45.19                 |
| 18107              | Montgomery, IN            | -0.071               | 33.72                     | 36.85                 |
| 18109              | Morgan, IN                | -0.004               | 53.42                     | 21.56                 |
| 18111              | Newton, IN                | -0.087               | 29.16                     | 33.66                 |
| 18113              | Noble, IN                 | 0.012                | 58.36                     | 47.42                 |
| 18115              | Ohio, IN                  | -0.132               | 15.44                     | 2.52                  |
| 18117              | Orange, IN                | 0.056                | 69.6                      | 64.55                 |
| 18119              | Owen, IN                  | 0.088                | 77.17                     | 34.55                 |
| 18121              | Parke, IN                 | 0.171                | 90.1                      | 58.09                 |
| 18123              | Perry, IN                 | -0.038               | 43.94                     | 31.02                 |
| 18125              | Pike, IN                  | -0.005               | 53.33                     | 17.45                 |



| <b>County FIPS</b> | <b>County Description</b> | <b>DOS-SVI Index</b> | <b>DOS-SVI Percentile</b> | <b>SVI Percentile</b> |
|--------------------|---------------------------|----------------------|---------------------------|-----------------------|
| 18127              | Porter, IN                | -0.12                | 19.01                     | 14.78                 |
| 18129              | Posey, IN                 | -0.065               | 35.31                     | 1.05                  |
| 18131              | Pulaski, IN               | 0.017                | 59.76                     | 23.09                 |
| 18133              | Putnam, IN                | 0.064                | 71.89                     | 34.84                 |
| 18135              | Randolph, IN              | -0.068               | 34.48                     | 42.96                 |
| 18137              | Ripley, IN                | 0.033                | 64.12                     | 37.74                 |
| 18139              | Rush, IN                  | -0.067               | 34.73                     | 25.67                 |
| 18141              | St. Joseph, IN            | -0.098               | 25.21                     | 62.23                 |
| 18143              | Scott, IN                 | 0.059                | 70.58                     | 42.01                 |
| 18145              | Shelby, IN                | -0.074               | 32.73                     | 21.82                 |
| 18147              | Spencer, IN               | -0.032               | 45.78                     | 8.79                  |
| 18149              | Starke, IN                | 0.044                | 66.89                     | 34.17                 |
| 18151              | Steuben, IN               | -0.072               | 33.52                     | 27.1                  |
| 18153              | Sullivan, IN              | 0.051                | 68.61                     | 64.01                 |
| 18155              | Switzerland, IN           | 0.159                | 88.54                     | 62.71                 |
| 18157              | Tippecanoe, IN            | -0.093               | 27.09                     | 49.3                  |
| 18159              | Tipton, IN                | -0.079               | 31.61                     | 7.26                  |
| 18161              | Union, IN                 | -0.024               | 47.95                     | 17.13                 |
| 18163              | Vanderburgh, IN           | -0.111               | 21.33                     | 52.42                 |
| 18165              | Vermillion, IN            | -0.017               | 49.98                     | 45.03                 |
| 18167              | Vigo, IN                  | 0.008                | 56.92                     | 72.74                 |
| 18169              | Wabash, IN                | -0.053               | 39.41                     | 28.82                 |
| 18171              | Warren, IN                | -0.09                | 28.11                     | 7.8                   |
| 18173              | Warrick, IN               | -0.091               | 27.95                     | 6.78                  |
| 18175              | Washington, IN            | 0.073                | 74.34                     | 37.77                 |
| 18177              | Wayne, IN                 | -0.072               | 33.33                     | 71.05                 |
| 18179              | Wells, IN                 | -0.084               | 29.89                     | 14.39                 |
| 18181              | White, IN                 | -0.039               | 43.39                     | 24.39                 |
| 18183              | Whitley, IN               | -0.117               | 19.74                     | 3.15                  |
| 19001              | Adair, IA                 | -0.133               | 15.35                     | 5.38                  |
| 19003              | Adams, IA                 | -0.09                | 28.21                     | 3.76                  |
| 19005              | Allamakee, IA             | -0.032               | 45.69                     | 32.2                  |
| 19007              | Appanoose, IA             | 0.001                | 54.95                     | 37.83                 |
| 19009              | Audubon, IA               | -0.168               | 8.28                      | 2.26                  |
| 19011              | Benton, IA                | -0.096               | 26.07                     | 1.18                  |
| 19013              | Black Hawk, IA            | -0.139               | 14.01                     | 42.64                 |
| 19015              | Boone, IA                 | -0.102               | 23.97                     | 11.78                 |
| 19017              | Bremer, IA                | -0.131               | 15.82                     | 3.22                  |
| 19019              | Buchanan, IA              | -0.044               | 41.87                     | 6.62                  |
| 19021              | Buena Vista, IA           | -0.007               | 52.47                     | 74.08                 |
| 19023              | Butler, IA                | -0.117               | 19.77                     | 2.36                  |
| 19025              | Calhoun, IA               | -0.111               | 21.36                     | 15.8                  |
| 19027              | Carroll, IA               | -0.15                | 11.81                     | 4.55                  |
| 19029              | Cass, IA                  | -0.156               | 10.35                     | 19.81                 |
| 19031              | Cedar, IA                 | -0.099               | 24.83                     | 0.8                   |
| 19033              | Cerro Gordo, IA           | -0.166               | 8.63                      | 24.97                 |
| 19035              | Cherokee, IA              | -0.206               | 4.2                       | 17.01                 |
| 19037              | Chickasaw, IA             | -0.119               | 19.29                     | 5.99                  |
| 19039              | Clarke, IA                | 0.007                | 56.51                     | 48.47                 |
| 19041              | Clay, IA                  | -0.119               | 19.36                     | 34.39                 |
| 19043              | Clayton, IA               | -0.086               | 29.48                     | 18.41                 |
| 19045              | Clinton, IA               | -0.143               | 13.31                     | 26.46                 |
| 19047              | Crawford, IA              | -0.022               | 48.46                     | 85.51                 |
| 19049              | Dallas, IA                | -0.131               | 16.01                     | 5.96                  |
| 19051              | Davis, IA                 | 0.367                | 98.53                     | 35.03                 |

| <b>County FIPS</b> | <b>County Description</b> | <b>DOS-SVI Index</b> | <b>DOS-SVI Percentile</b> | <b>SVI Percentile</b> |
|--------------------|---------------------------|----------------------|---------------------------|-----------------------|
| 19053              | Decatur, IA               | 0.092                | 77.84                     | 68.22                 |
| 19055              | Delaware, IA              | -0.069               | 34.19                     | 3.44                  |
| 19057              | Des Moines, IA            | -0.136               | 14.8                      | 46.53                 |
| 19059              | Dickinson, IA             | -0.244               | 2.1                       | 9.17                  |
| 19061              | Dubuque, IA               | -0.095               | 26.43                     | 23.47                 |
| 19063              | Emmet, IA                 | -0.051               | 39.7                      | 39.46                 |
| 19065              | Fayette, IA               | -0.139               | 14.04                     | 22.52                 |
| 19067              | Floyd, IA                 | -0.081               | 30.75                     | 35.96                 |
| 19069              | Franklin, IA              | -0.146               | 12.35                     | 19.62                 |
| 19071              | Fremont, IA               | -0.058               | 37.57                     | 5.54                  |
| 19073              | Greene, IA                | -0.063               | 35.91                     | 19.78                 |
| 19075              | Grundy, IA                | -0.132               | 15.51                     | 0.38                  |
| 19077              | Guthrie, IA               | -0.124               | 17.7                      | 12.2                  |
| 19079              | Hamilton, IA              | -0.122               | 18.31                     | 11.53                 |
| 19081              | Hancock, IA               | -0.132               | 15.63                     | 7.13                  |
| 19083              | Hardin, IA                | -0.084               | 30.05                     | 12.42                 |
| 19085              | Harrison, IA              | -0.113               | 20.92                     | 6.46                  |
| 19087              | Henry, IA                 | -0.105               | 22.83                     | 31.34                 |
| 19089              | Howard, IA                | -0.086               | 29.23                     | 15.67                 |
| 19091              | Humboldt, IA              | -0.124               | 17.67                     | 14.46                 |
| 19093              | Ida, IA                   | -0.098               | 25.34                     | 8.66                  |
| 19095              | Iowa, IA                  | -0.098               | 25.09                     | 3.47                  |
| 19097              | Jackson, IA               | -0.088               | 28.62                     | 12.68                 |
| 19099              | Jasper, IA                | -0.062               | 36.01                     | 25.48                 |
| 19101              | Jefferson, IA             | -0.094               | 26.87                     | 48.95                 |
| 19103              | Johnson, IA               | -0.158               | 9.93                      | 26.75                 |
| 19105              | Jones, IA                 | -0.033               | 45.59                     | 19.24                 |
| 19107              | Keokuk, IA                | -0.093               | 27                        | 3.98                  |
| 19109              | Kossuth, IA               | -0.173               | 7.42                      | 10.48                 |
| 19111              | Lee, IA                   | -0.073               | 33.05                     | 50.41                 |
| 19113              | Linn, IA                  | -0.156               | 10.28                     | 18.06                 |
| 19115              | Louisa, IA                | -0.01                | 51.86                     | 45.7                  |
| 19117              | Lucas, IA                 | -0.115               | 20.44                     | 27.55                 |
| 19119              | Lyon, IA                  | -0.071               | 33.62                     | 4.39                  |
| 19121              | Madison, IA               | -0.061               | 36.55                     | 2.04                  |
| 19123              | Mahaska, IA               | -0.014               | 50.84                     | 46.37                 |
| 19125              | Marion, IA                | -0.049               | 40.4                      | 19.49                 |
| 19127              | Marshall, IA              | -0.081               | 31.2                      | 68.63                 |
| 19129              | Mills, IA                 | -0.062               | 36.2                      | 10.76                 |
| 19131              | Mitchell, IA              | -0.091               | 27.7                      | 8.6                   |
| 19133              | Monona, IA                | -0.167               | 8.5                       | 17.96                 |
| 19135              | Monroe, IA                | 0.053                | 69.02                     | 25.19                 |
| 19137              | Montgomery, IA            | -0.067               | 34.7                      | 52.8                  |
| 19139              | Muscatine, IA             | -0.12                | 19.13                     | 39.04                 |
| 19141              | O'Brien, IA               | -0.057               | 38.05                     | 23.22                 |
| 19143              | Osceola, IA               | -0.073               | 33.21                     | 26.34                 |
| 19145              | Page, IA                  | -0.127               | 16.78                     | 33.41                 |
| 19147              | Palo Alto, IA             | -0.126               | 16.87                     | 17.29                 |
| 19149              | Plymouth, IA              | -0.133               | 15.22                     | 12.71                 |
| 19151              | Pocahontas, IA            | -0.116               | 19.99                     | 14.62                 |
| 19153              | Polk, IA                  | -0.161               | 9.14                      | 37.68                 |
| 19155              | Pottawattamie, IA         | -0.1                 | 24.71                     | 45.99                 |
| 19157              | Poweshiek, IA             | -0.123               | 17.89                     | 15.48                 |
| 19159              | Ringgold, IA              | -0.073               | 32.98                     | 12.99                 |
| 19161              | Sac, IA                   | -0.186               | 5.92                      | 7.48                  |

| <b>County FIPS</b> | <b>County Description</b> | <b>DOS-SVI Index</b> | <b>DOS-SVI Percentile</b> | <b>SVI Percentile</b> |
|--------------------|---------------------------|----------------------|---------------------------|-----------------------|
| 19163              | Scott, IA                 | -0.151               | 11.24                     | 26.59                 |
| 19165              | Shelby, IA                | -0.13                | 16.2                      | 13.03                 |
| 19167              | Sioux, IA                 | 0.038                | 65.46                     | 22.07                 |
| 19169              | Story, IA                 | -0.165               | 8.66                      | 21.24                 |
| 19171              | Tama, IA                  | -0.06                | 37.03                     | 32.74                 |
| 19173              | Taylor, IA                | -0.09                | 28.27                     | 27.71                 |
| 19175              | Union, IA                 | -0.092               | 27.64                     | 44.55                 |
| 19177              | Van Buren, IA             | 0.063                | 71.79                     | 24.65                 |
| 19179              | Wapello, IA               | -0.044               | 42.18                     | 74.39                 |
| 19181              | Warren, IA                | -0.113               | 20.98                     | 7.2                   |
| 19183              | Washington, IA            | -0.098               | 25.12                     | 22.39                 |
| 19185              | Wayne, IA                 | 0.125                | 83.92                     | 45.83                 |
| 19187              | Webster, IA               | -0.087               | 29.13                     | 45.8                  |
| 19189              | Winnebago, IA             | -0.106               | 22.54                     | 20.61                 |
| 19191              | Winneshiek, IA            | -0.104               | 23.46                     | 1.15                  |
| 19193              | Woodbury, IA              | -0.096               | 25.95                     | 69.68                 |
| 19195              | Worth, IA                 | -0.145               | 12.64                     | 6.97                  |
| 19197              | Wright, IA                | -0.124               | 17.77                     | 48.03                 |
| 20001              | Allen, KS                 | -0.018               | 49.89                     | 39.78                 |
| 20003              | Anderson, KS              | 0.023                | 61.6                      | 22.74                 |
| 20005              | Atchison, KS              | 0.042                | 66.51                     | 49.11                 |
| 20007              | Barber, KS                | -0.081               | 31.14                     | 28.03                 |
| 20009              | Barton, KS                | -0.089               | 28.34                     | 54.39                 |
| 20011              | Bourbon, KS               | 0.092                | 77.97                     | 58.28                 |
| 20013              | Brown, KS                 | -0.046               | 41.39                     | 27.17                 |
| 20015              | Butler, KS                | 0.026                | 62.4                      | 26.24                 |
| 20017              | Chase, KS                 | 0.037                | 65.33                     | 40.67                 |
| 20019              | Chautauqua, KS            | 0.029                | 63.04                     | 71.88                 |
| 20021              | Cherokee, KS              | 0.043                | 66.67                     | 38.28                 |
| 20023              | Cheyenne, KS              | -0.188               | 5.7                       | 10.03                 |
| 20025              | Clark, KS                 | -0.091               | 27.73                     | 31.24                 |
| 20027              | Clay, KS                  | -0.159               | 9.62                      | 4.94                  |
| 20029              | Cloud, KS                 | -0.133               | 15.25                     | 27.39                 |
| 20031              | Coffey, KS                | -0.073               | 32.95                     | 20.35                 |
| 20033              | Comanche, KS              | -0.14                | 13.88                     | 7.93                  |
| 20035              | Cowley, KS                | -0.012               | 51.26                     | 73.18                 |
| 20037              | Crawford, KS              | 0.083                | 76.09                     | 69.87                 |
| 20039              | Decatur, KS               | -0.198               | 5.06                      | 15.73                 |
| 20041              | Dickinson, KS             | 0.002                | 55.3                      | 33.22                 |
| 20043              | Doniphan, KS              | 0.012                | 58.52                     | 23.06                 |
| 20045              | Douglas, KS               | -0.122               | 18.24                     | 22.32                 |
| 20047              | Edwards, KS               | -0.149               | 11.84                     | 37.2                  |
| 20049              | Elk, KS                   | 0.011                | 58.1                      | 38.95                 |
| 20051              | Ellis, KS                 | -0.094               | 26.71                     | 15.64                 |
| 20053              | Ellsworth, KS             | 0.028                | 62.78                     | 39.52                 |
| 20055              | Finney, KS                | 0.1                  | 79.47                     | 82.36                 |
| 20057              | Ford, KS                  | 0.057                | 70.11                     | 85.7                  |
| 20059              | Franklin, KS              | -0.005               | 53.07                     | 21.37                 |
| 20061              | Geary, KS                 | 0.049                | 68.16                     | 65.76                 |
| 20063              | Gove, KS                  | -0.155               | 10.47                     | 9.75                  |
| 20065              | Graham, KS                | -0.15                | 11.65                     | 12.55                 |
| 20067              | Grant, KS                 | 0.114                | 82.04                     | 38.15                 |
| 20069              | Gray, KS                  | 0.04                 | 66.03                     | 27.36                 |
| 20071              | Greeley, KS               | -0.009               | 52.09                     | 57.52                 |
| 20073              | Greenwood, KS             | -0.044               | 42.15                     | 21.27                 |

| <b>County FIPS</b> | <b>County Description</b> | <b>DOS-SVI Index</b> | <b>DOS-SVI Percentile</b> | <b>SVI Percentile</b> |
|--------------------|---------------------------|----------------------|---------------------------|-----------------------|
| 20075              | Hamilton, KS              | -0.057               | 37.98                     | 25.86                 |
| 20077              | Harper, KS                | -0.097               | 25.79                     | 32.23                 |
| 20079              | Harvey, KS                | -0.075               | 32.47                     | 33.5                  |
| 20081              | Haskell, KS               | 0.211                | 93.79                     | 41.15                 |
| 20083              | Hodgeman, KS              | -0.046               | 41.36                     | 11.18                 |
| 20085              | Jackson, KS               | -0.05                | 39.99                     | 26.94                 |
| 20087              | Jefferson, KS             | -0.062               | 36.1                      | 5.48                  |
| 20089              | Jewell, KS                | -0.137               | 14.36                     | 8.76                  |
| 20091              | Johnson, KS               | -0.209               | 4.08                      | 6.15                  |
| 20093              | Kearny, KS                | 0.013                | 58.8                      | 46.56                 |
| 20095              | Kingman, KS               | -0.119               | 19.26                     | 5.13                  |
| 20097              | Kiowa, KS                 | -0.022               | 48.68                     | 25.8                  |
| 20099              | Labette, KS               | 0.013                | 58.77                     | 63.92                 |
| 20101              | Lane, KS                  | -0.059               | 37.34                     | 3.03                  |
| 20103              | Leavenworth, KS           | -0.047               | 40.97                     | 24.04                 |
| 20105              | Lincoln, KS               | -0.043               | 42.31                     | 13.22                 |
| 20107              | Linn, KS                  | 0.035                | 64.98                     | 44.78                 |
| 20109              | Logan, KS                 | -0.065               | 35.53                     | 12.96                 |
| 20111              | Lyon, KS                  | -0.036               | 44.22                     | 73.22                 |
| 20113              | McPherson, KS             | -0.119               | 19.39                     | 10.67                 |
| 20115              | Marion, KS                | -0.021               | 48.81                     | 17.71                 |
| 20117              | Marshall, KS              | -0.047               | 41.04                     | 12.64                 |
| 20119              | Meade, KS                 | -0.103               | 23.81                     | 37.17                 |
| 20121              | Miami, KS                 | -0.073               | 33.02                     | 2.58                  |
| 20123              | Mitchell, KS              | -0.02                | 49                        | 28.44                 |
| 20125              | Montgomery, KS            | -0.035               | 44.63                     | 80.29                 |
| 20127              | Morris, KS                | -0.123               | 17.99                     | 24.36                 |
| 20129              | Morton, KS                | -0.101               | 24.36                     | 40.8                  |
| 20131              | Nemaha, KS                | -0.061               | 36.87                     | 9.62                  |
| 20133              | Neosho, KS                | -0.013               | 51.13                     | 65.8                  |
| 20135              | Ness, KS                  | -0.185               | 6.08                      | 15                    |
| 20137              | Norton, KS                | -0.054               | 39.1                      | 29.75                 |
| 20139              | Osage, KS                 | -0.034               | 44.99                     | 23.41                 |
| 20141              | Osborne, KS               | -0.152               | 11.18                     | 7.23                  |
| 20143              | Ottawa, KS                | -0.072               | 33.3                      | 2.71                  |
| 20145              | Pawnee, KS                | -0.101               | 24.55                     | 28.66                 |
| 20147              | Phillips, KS              | -0.041               | 42.88                     | 24.2                  |
| 20149              | Pottawatomie, KS          | 0.065                | 72.3                      | 14.87                 |
| 20151              | Pratt, KS                 | 0.044                | 67.05                     | 38.73                 |
| 20153              | Rawlins, KS               | -0.143               | 13.15                     | 13.6                  |
| 20155              | Reno, KS                  | -0.012               | 51.73                     | 58.66                 |
| 20157              | Republic, KS              | -0.146               | 12.42                     | 6.05                  |
| 20159              | Rice, KS                  | -0.008               | 52.37                     | 42.52                 |
| 20161              | Riley, KS                 | -0.046               | 41.32                     | 43.73                 |
| 20163              | Rooks, KS                 | -0.105               | 22.67                     | 14.2                  |
| 20165              | Rush, KS                  | -0.103               | 23.75                     | 7.83                  |
| 20167              | Russell, KS               | -0.092               | 27.48                     | 23.92                 |
| 20169              | Saline, KS                | -0.076               | 32.28                     | 41.62                 |
| 20171              | Scott, KS                 | 0.008                | 57.05                     | 30.61                 |
| 20173              | Sedgwick, KS              | -0.097               | 25.85                     | 53.57                 |
| 20175              | Seward, KS                | -0.006               | 52.82                     | 91.11                 |
| 20177              | Shawnee, KS               | -0.097               | 25.69                     | 50.99                 |
| 20179              | Sheridan, KS              | -0.166               | 8.56                      | 6.85                  |
| 20181              | Sherman, KS               | -0.039               | 43.46                     | 49.84                 |
| 20183              | Smith, KS                 | -0.204               | 4.52                      | 5.03                  |

| <b>County FIPS</b> | <b>County Description</b> | <b>DOS-SVI Index</b> | <b>DOS-SVI Percentile</b> | <b>SVI Percentile</b> |
|--------------------|---------------------------|----------------------|---------------------------|-----------------------|
| 20185              | Stafford, KS              | -0.068               | 34.42                     | 27.77                 |
| 20187              | Stanton, KS               | 0.021                | 61.03                     | 49.65                 |
| 20189              | Stevens, KS               | 0.028                | 62.69                     | 67.39                 |
| 20191              | Sumner, KS                | -0.02                | 49.19                     | 22.23                 |
| 20193              | Thomas, KS                | -0.039               | 43.49                     | 7.04                  |
| 20195              | Trego, KS                 | -0.309               | 0.51                      | 3.89                  |
| 20197              | Wabaunsee, KS             | -0.024               | 48.01                     | 5.32                  |
| 20199              | Wallace, KS               | -0.105               | 22.89                     | 14.3                  |
| 20201              | Washington, KS            | -0.097               | 25.5                      | 14.81                 |
| 20203              | Wichita, KS               | -0.018               | 49.79                     | 46.78                 |
| 20205              | Wilson, KS                | 0.04                 | 65.97                     | 63.66                 |
| 20207              | Woodson, KS               | 0.018                | 60.14                     | 43.98                 |
| 20209              | Wyandotte, KS             | -0.06                | 37.19                     | 92.42                 |
| 21001              | Adair, KY                 | 0.197                | 92.49                     | 71.21                 |
| 21003              | Allen, KY                 | 0.12                 | 83.13                     | 67.96                 |
| 21005              | Anderson, KY              | 0.025                | 62.05                     | 26.37                 |
| 21007              | Ballard, KY               | 0.027                | 62.46                     | 44.59                 |
| 21009              | Barren, KY                | 0.092                | 77.94                     | 77.61                 |
| 21011              | Bath, KY                  | 0.202                | 92.93                     | 72.9                  |
| 21013              | Bell, KY                  | 0.244                | 95.89                     | 89.27                 |
| 21015              | Boone, KY                 | -0.143               | 13.05                     | 12.77                 |
| 21017              | Bourbon, KY               | -0.066               | 35.24                     | 55.61                 |
| 21019              | Boyd, KY                  | -0.009               | 52.12                     | 69.08                 |
| 21021              | Boyle, KY                 | -0.014               | 50.75                     | 43.15                 |
| 21023              | Bracken, KY               | 0.147                | 86.88                     | 38.66                 |
| 21025              | Breathitt, KY             | 0.405                | 98.79                     | 82.2                  |
| 21027              | Breckinridge, KY          | 0.241                | 95.67                     | 73.76                 |
| 21029              | Bullitt, KY               | -0.038               | 43.9                      | 13.85                 |
| 21031              | Butler, KY                | 0.114                | 81.98                     | 79.2                  |
| 21033              | Caldwell, KY              | 0.037                | 65.17                     | 49.81                 |
| 21035              | Calloway, KY              | 0.011                | 57.94                     | 49.97                 |
| 21037              | Campbell, KY              | -0.117               | 19.71                     | 21.88                 |
| 21039              | Carlisle, KY              | 0.058                | 70.36                     | 33.95                 |
| 21041              | Carroll, KY               | 0.279                | 97.2                      | 89.04                 |
| 21043              | Carter, KY                | 0.194                | 92.17                     | 82.04                 |
| 21045              | Casey, KY                 | 0.196                | 92.36                     | 76.56                 |
| 21047              | Christian, KY             | 0.125                | 83.99                     | 91.27                 |
| 21049              | Clark, KY                 | -0.03                | 46.2                      | 60.61                 |
| 21051              | Clay, KY                  | 0.427                | 98.95                     | 90.99                 |
| 21053              | Clinton, KY               | 0.218                | 94.27                     | 77.8                  |
| 21055              | Crittenden, KY            | 0.057                | 69.98                     | 48.44                 |
| 21057              | Cumberland, KY            | 0.111                | 81.57                     | 53.15                 |
| 21059              | Daviess, KY               | -0.017               | 50.14                     | 61.69                 |
| 21061              | Edmonson, KY              | 0.157                | 88.09                     | 63.57                 |
| 21063              | Elliott, KY               | 0.226                | 94.91                     | 72.39                 |
| 21065              | Estill, KY                | 0.201                | 92.9                      | 79.97                 |
| 21067              | Fayette, KY               | -0.178               | 6.81                      | 48.76                 |
| 21069              | Fleming, KY               | 0.185                | 91.34                     | 77.1                  |
| 21071              | Floyd, KY                 | 0.27                 | 96.78                     | 85.03                 |
| 21073              | Franklin, KY              | -0.087               | 29.04                     | 54.68                 |
| 21075              | Fulton, KY                | 0.006                | 56.45                     | 87.04                 |
| 21077              | Gallatin, KY              | 0.165                | 89.46                     | 61.24                 |
| 21079              | Garrard, KY               | 0.048                | 67.94                     | 42.99                 |
| 21081              | Grant, KY                 | 0.2                  | 92.74                     | 56.02                 |
| 21083              | Graves, KY                | 0.101                | 79.59                     | 77.52                 |

| <b>County FIPS</b> | <b>County Description</b> | <b>DOS-SVI Index</b> | <b>DOS-SVI Percentile</b> | <b>SVI Percentile</b> |
|--------------------|---------------------------|----------------------|---------------------------|-----------------------|
| 21085              | Grayson, KY               | 0.133                | 84.88                     | 60.96                 |
| 21087              | Green, KY                 | 0.044                | 67.08                     | 52.26                 |
| 21089              | Greenup, KY               | 0.005                | 55.91                     | 32.17                 |
| 21091              | Hancock, KY               | 0.059                | 70.45                     | 38.22                 |
| 21093              | Hardin, KY                | -0.012               | 51.7                      | 56.72                 |
| 21095              | Harlan, KY                | 0.256                | 96.4                      | 88.03                 |
| 21097              | Harrison, KY              | 0.073                | 74.44                     | 50.57                 |
| 21099              | Hart, KY                  | 0.205                | 93.12                     | 76.59                 |
| 21101              | Henderson, KY             | -0.042               | 42.69                     | 70.89                 |
| 21103              | Henry, KY                 | 0.068                | 72.91                     | 52.74                 |
| 21105              | Hickman, KY               | 0.037                | 65.27                     | 57.39                 |
| 21107              | Hopkins, KY               | 0.014                | 58.96                     | 55.41                 |
| 21109              | Jackson, KY               | 0.191                | 91.82                     | 66.62                 |
| 21111              | Jefferson, KY             | -0.139               | 13.91                     | 56.82                 |
| 21113              | Jessamine, KY             | -0.045               | 41.71                     | 52.01                 |
| 21115              | Johnson, KY               | 0.227                | 94.97                     | 81.02                 |
| 21117              | Kenton, KY                | -0.09                | 28.02                     | 33.79                 |
| 21119              | Knott, KY                 | 0.464                | 99.17                     | 85.48                 |
| 21121              | Knox, KY                  | 0.218                | 94.21                     | 83.25                 |
| 21123              | Larue, KY                 | 0.002                | 55.24                     | 53.18                 |
| 21125              | Laurel, KY                | 0.185                | 91.18                     | 75.22                 |
| 21127              | Lawrence, KY              | 0.329                | 98.22                     | 75.83                 |
| 21129              | Lee, KY                   | 0.21                 | 93.7                      | 81.82                 |
| 21131              | Leslie, KY                | 0.414                | 98.82                     | 77.45                 |
| 21133              | Letcher, KY               | 0.25                 | 96.21                     | 87.55                 |
| 21135              | Lewis, KY                 | 0.145                | 86.56                     | 62.42                 |
| 21137              | Lincoln, KY               | 0.194                | 92.1                      | 70.83                 |
| 21139              | Livingston, KY            | 0.087                | 76.98                     | 26.4                  |
| 21141              | Logan, KY                 | 0.028                | 62.56                     | 52.87                 |
| 21143              | Lyon, KY                  | 0.05                 | 68.35                     | 32.52                 |
| 21145              | McCracken, KY             | -0.091               | 27.76                     | 41.53                 |
| 21147              | McCreary, KY              | 0.447                | 99.11                     | 87.8                  |
| 21149              | McLean, KY                | 0.087                | 77.11                     | 42.17                 |
| 21151              | Madison, KY               | -0.008               | 52.4                      | 49.68                 |
| 21153              | Magoffin, KY              | 0.453                | 99.14                     | 80.57                 |
| 21155              | Marion, KY                | 0.16                 | 88.73                     | 90.57                 |
| 21157              | Marshall, KY              | 0.025                | 62.21                     | 27.23                 |
| 21159              | Martin, KY                | 0.441                | 99.08                     | 84.94                 |
| 21161              | Mason, KY                 | -0.001               | 54.44                     | 66.82                 |
| 21163              | Meade, KY                 | 0.14                 | 86.02                     | 31.78                 |
| 21165              | Menifee, KY               | 0.155                | 87.87                     | 58.47                 |
| 21167              | Mercer, KY                | 0.017                | 59.92                     | 41.34                 |
| 21169              | Metcalfe, KY              | 0.09                 | 77.59                     | 68.12                 |
| 21171              | Monroe, KY                | 0.13                 | 84.59                     | 69.75                 |
| 21173              | Montgomery, KY            | 0.121                | 83.35                     | 79.87                 |
| 21175              | Morgan, KY                | 0.243                | 95.8                      | 82.93                 |
| 21177              | Muhlenberg, KY            | 0.121                | 83.38                     | 61.34                 |
| 21179              | Nelson, KY                | 0.029                | 63.23                     | 28.95                 |
| 21181              | Nicholas, KY              | 0.246                | 95.96                     | 81.97                 |
| 21183              | Ohio, KY                  | 0.108                | 80.87                     | 57.99                 |
| 21185              | Oldham, KY                | -0.061               | 36.58                     | 3.95                  |
| 21187              | Owen, KY                  | 0.209                | 93.5                      | 52.64                 |
| 21189              | Owsley, KY                | 0.188                | 91.59                     | 84.14                 |
| 21191              | Pendleton, KY             | 0.074                | 74.47                     | 41.5                  |
| 21193              | Perry, KY                 | 0.307                | 97.68                     | 90.51                 |

| <b>County FIPS</b> | <b>County Description</b> | <b>DOS-SVI Index</b> | <b>DOS-SVI Percentile</b> | <b>SVI Percentile</b> |
|--------------------|---------------------------|----------------------|---------------------------|-----------------------|
| 21195              | Pike, KY                  | 0.195                | 92.23                     | 79.08                 |
| 21197              | Powell, KY                | 0.247                | 96.08                     | 77.32                 |
| 21199              | Pulaski, KY               | 0.075                | 74.78                     | 74.2                  |
| 21201              | Robertson, KY             | -0.015               | 50.65                     | 35.38                 |
| 21203              | Rockcastle, KY            | 0.183                | 91.09                     | 78.82                 |
| 21205              | Rowan, KY                 | 0.174                | 90.39                     | 75.57                 |
| 21207              | Russell, KY               | 0.21                 | 93.66                     | 86.34                 |
| 21209              | Scott, KY                 | -0.009               | 51.99                     | 33.31                 |
| 21211              | Shelby, KY                | -0.006               | 52.75                     | 42.61                 |
| 21213              | Simpson, KY               | -0.058               | 37.79                     | 28.79                 |
| 21215              | Spencer, KY               | -0.064               | 35.66                     | 3.69                  |
| 21217              | Taylor, KY                | 0.012                | 58.58                     | 72.1                  |
| 21219              | Todd, KY                  | 0.219                | 94.49                     | 80.92                 |
| 21221              | Trigg, KY                 | 0.047                | 67.69                     | 36.5                  |
| 21223              | Trimble, KY               | 0.179                | 90.77                     | 71.43                 |
| 21225              | Union, KY                 | 0.085                | 76.44                     | 53.66                 |
| 21227              | Warren, KY                | -0.019               | 49.38                     | 70.96                 |
| 21229              | Washington, KY            | 0.073                | 74.08                     | 51.27                 |
| 21231              | Wayne, KY                 | 0.225                | 94.81                     | 74.78                 |
| 21233              | Webster, KY               | 0.13                 | 84.53                     | 78.54                 |
| 21235              | Whitley, KY               | 0.254                | 96.34                     | 83.79                 |
| 21237              | Wolfe, KY                 | 0.37                 | 98.6                      | 86.21                 |
| 21239              | Woodford, KY              | -0.152               | 11.14                     | 20.41                 |
| 22001              | Acadia, LA                | 0.153                | 87.61                     | 91.82                 |
| 22003              | Allen, LA                 | 0.317                | 97.9                      | 92.61                 |
| 22005              | Ascension, LA             | 0.033                | 64.06                     | 39.68                 |
| 22007              | Assumption, LA            | 0.084                | 76.34                     | 77.9                  |
| 22009              | Avoyelles, LA             | 0.175                | 90.48                     | 96.34                 |
| 22011              | Beauregard, LA            | 0.159                | 88.6                      | 65.19                 |
| 22013              | Bienville, LA             | 0.157                | 88.19                     | 94.01                 |
| 22015              | Bossier, LA               | -0.019               | 49.54                     | 58.76                 |
| 22017              | Caddo, LA                 | -0.07                | 33.88                     | 83.85                 |
| 22019              | Calcasieu, LA             | 0.01                 | 57.75                     | 73.92                 |
| 22021              | Caldwell, LA              | 0.305                | 97.58                     | 93.31                 |
| 22023              | Cameron, LA               | 0.147                | 86.82                     | 26.43                 |
| 22025              | Catahoula, LA             | 0.156                | 88                        | 78.06                 |
| 22027              | Claiborne, LA             | 0.119                | 83.03                     | 94.78                 |
| 22029              | Concordia, LA             | 0.231                | 95.13                     | 91.34                 |
| 22031              | De Soto, LA               | 0.134                | 85.1                      | 89.17                 |
| 22033              | East Baton Rouge, LA      | -0.173               | 7.39                      | 66.53                 |
| 22035              | East Carroll, LA          | 0.431                | 99.01                     | 93.57                 |
| 22037              | East Feliciana, LA        | 0.236                | 95.48                     | 81.85                 |
| 22039              | Evangeline, LA            | 0.206                | 93.19                     | 99.75                 |
| 22041              | Franklin, LA              | 0.195                | 92.3                      | 95.19                 |
| 22043              | Grant, LA                 | 0.217                | 94.14                     | 62.74                 |
| 22045              | Iberia, LA                | 0.146                | 86.66                     | 96.05                 |
| 22047              | Iberville, LA             | 0.123                | 83.8                      | 88.6                  |
| 22049              | Jackson, LA               | 0.088                | 77.3                      | 93.82                 |
| 22051              | Jefferson, LA             | -0.225               | 3.15                      | 61.21                 |
| 22053              | Jefferson Davis, LA       | 0.135                | 85.36                     | 81.05                 |
| 22055              | Lafayette, LA             | -0.075               | 32.54                     | 62.17                 |
| 22057              | Lafourche, LA             | 0.034                | 64.66                     | 76.69                 |
| 22059              | LaSalle, LA               | 0.121                | 83.32                     | 76.34                 |
| 22061              | Lincoln, LA               | 0.05                 | 68.42                     | 84.78                 |
| 22063              | Livingston, LA            | 0.099                | 79.27                     | 43.09                 |

| <b>County FIPS</b> | <b>County Description</b> | <b>DOS-SVI Index</b> | <b>DOS-SVI Percentile</b> | <b>SVI Percentile</b> |
|--------------------|---------------------------|----------------------|---------------------------|-----------------------|
| 22065              | Madison, LA               | 0.247                | 96.02                     | 96.97                 |
| 22067              | Morehouse, LA             | 0.109                | 81.15                     | 88.47                 |
| 22069              | Natchitoches, LA          | 0.119                | 83                        | 85.73                 |
| 22071              | Orleans, LA               | -0.108               | 21.94                     | 74.49                 |
| 22073              | Ouachita, LA              | 0.057                | 70.01                     | 85.22                 |
| 22075              | Plaquemines, LA           | 0.035                | 64.85                     | 70.61                 |
| 22077              | Pointe Coupee, LA         | 0.157                | 88.25                     | 84.75                 |
| 22079              | Rapides, LA               | 0.025                | 62.18                     | 90.86                 |
| 22081              | Red River, LA             | 0.122                | 83.51                     | 81.37                 |
| 22083              | Richland, LA              | 0.079                | 75.61                     | 85.54                 |
| 22085              | Sabine, LA                | 0.21                 | 93.63                     | 83.15                 |
| 22087              | St. Bernard, LA           | 0.054                | 69.25                     | 77.13                 |
| 22089              | St. Charles, LA           | -0.039               | 43.62                     | 35.29                 |
| 22091              | St. Helena, LA            | 0.191                | 91.88                     | 90                    |
| 22093              | St. James, LA             | 0.101                | 79.78                     | 62.99                 |
| 22095              | St. John the Baptist, LA  | -0.016               | 50.17                     | 74.68                 |
| 22097              | St. Landry, LA            | 0.144                | 86.34                     | 92.2                  |
| 22099              | St. Martin, LA            | 0.121                | 83.41                     | 78.31                 |
| 22101              | St. Mary, LA              | 0.076                | 75.04                     | 91.62                 |
| 22103              | St. Tammany, LA           | -0.109               | 21.84                     | 31.05                 |
| 22105              | Tangipahoa, LA            | 0.097                | 78.83                     | 88.85                 |
| 22107              | Tensas, LA                | 0.218                | 94.36                     | 83.66                 |
| 22109              | Terrebonne, LA            | 0.069                | 73.35                     | 89.52                 |
| 22111              | Union, LA                 | 0.165                | 89.4                      | 80.8                  |
| 22113              | Vermilion, LA             | 0.186                | 91.44                     | 82.01                 |
| 22115              | Vernon, LA                | 0.137                | 85.58                     | 74.33                 |
| 22117              | Washington, LA            | 0.187                | 91.53                     | 99.62                 |
| 22119              | Webster, LA               | 0.056                | 69.72                     | 87.9                  |
| 22121              | West Baton Rouge, LA      | 0.029                | 63.32                     | 76.11                 |
| 22123              | West Carroll, LA          | 0.083                | 76.19                     | 66.85                 |
| 22125              | West Feliciana, LA        | 0.075                | 74.75                     | 69.01                 |
| 22127              | Winn, LA                  | 0.099                | 79.31                     | 77.55                 |
| 23001              | Androscoggin, ME          | -0.034               | 45.21                     | 55.67                 |
| 23003              | Aroostook, ME             | -0.044               | 42.28                     | 59.46                 |
| 23005              | Cumberland, ME            | -0.159               | 9.74                      | 13.63                 |
| 23007              | Franklin, ME              | -0.06                | 37.12                     | 21.5                  |
| 23009              | Hancock, ME               | -0.086               | 29.26                     | 19.3                  |
| 23011              | Kennebec, ME              | -0.034               | 44.92                     | 37.87                 |
| 23013              | Knox, ME                  | -0.12                | 18.85                     | 14.75                 |
| 23015              | Lincoln, ME               | -0.176               | 7.13                      | 11.43                 |
| 23017              | Oxford, ME                | -0.05                | 40.02                     | 37.26                 |
| 23019              | Penobscot, ME             | -0.017               | 49.95                     | 45.32                 |
| 23021              | Piscataquis, ME           | -0.058               | 37.63                     | 48.98                 |
| 23023              | Sagadahoc, ME             | -0.167               | 8.47                      | 5.22                  |
| 23025              | Somerset, ME              | 0.067                | 72.72                     | 62.2                  |
| 23027              | Waldo, ME                 | -0.034               | 44.95                     | 21.97                 |
| 23029              | Washington, ME            | -0.042               | 42.6                      | 64.39                 |
| 23031              | York, ME                  | -0.126               | 16.97                     | 9.36                  |
| 24001              | Allegany, MD              | 0.008                | 56.99                     | 62.1                  |
| 24003              | Anne Arundel, MD          | -0.212               | 3.85                      | 17.83                 |
| 24005              | Baltimore, MD             | -0.275               | 1.11                      | 38.18                 |
| 24009              | Calvert, MD               | -0.166               | 8.6                       | 4.71                  |
| 24011              | Caroline, MD              | -0.051               | 39.8                      | 55.35                 |
| 24013              | Carroll, MD               | -0.145               | 12.7                      | 4.04                  |
| 24015              | Cecil, MD                 | -0.046               | 41.29                     | 29.33                 |



| <b>County FIPS</b> | <b>County Description</b> | <b>DOS-SVI Index</b> | <b>DOS-SVI Percentile</b> | <b>SVI Percentile</b> |
|--------------------|---------------------------|----------------------|---------------------------|-----------------------|
| 24017              | Charles, MD               | -0.228               | 2.93                      | 17.23                 |
| 24019              | Dorchester, MD            | -0.142               | 13.34                     | 75.06                 |
| 24021              | Frederick, MD             | -0.203               | 4.58                      | 15.89                 |
| 24023              | Garrett, MD               | -0.084               | 30.15                     | 18.12                 |
| 24025              | Harford, MD               | -0.179               | 6.69                      | 9.33                  |
| 24027              | Howard, MD                | -0.29                | 0.7                       | 13.06                 |
| 24029              | Kent, MD                  | -0.204               | 4.42                      | 42.77                 |
| 24031              | Montgomery, MD            | -0.342               | 0.38                      | 32.55                 |
| 24033              | Prince George's, MD       | -0.282               | 0.96                      | 62.61                 |
| 24035              | Queen Anne's, MD          | -0.161               | 9.17                      | 2.2                   |
| 24037              | St. Mary's, MD            | -0.126               | 16.91                     | 20.86                 |
| 24039              | Somerset, MD              | 0.03                 | 63.39                     | 89.78                 |
| 24041              | Talbot, MD                | -0.324               | 0.48                      | 13.31                 |
| 24043              | Washington, MD            | -0.063               | 35.88                     | 61.4                  |
| 24045              | Wicomico, MD              | -0.074               | 32.86                     | 77.39                 |
| 24047              | Worcester, MD             | -0.393               | 0.19                      | 28.03                 |
| 24510              | Baltimore City, MD        | -0.025               | 47.63                     | 83.12                 |
| 25001              | Barnstable, MA            | -0.274               | 1.18                      | 5.64                  |
| 25003              | Berkshire, MA             | -0.183               | 6.27                      | 40.83                 |
| 25005              | Bristol, MA               | -0.164               | 8.76                      | 52.48                 |
| 25007              | Dukes, MA                 | -0.234               | 2.64                      | 0.96                  |
| 25009              | Essex, MA                 | -0.22                | 3.6                       | 50.8                  |
| 25011              | Franklin, MA              | -0.173               | 7.45                      | 20.96                 |
| 25013              | Hampden, MA               | -0.145               | 12.58                     | 82.32                 |
| 25015              | Hampshire, MA             | -0.124               | 17.51                     | 23.25                 |
| 25017              | Middlesex, MA             | -0.236               | 2.42                      | 22.64                 |
| 25019              | Nantucket, MA             | -0.177               | 6.91                      | 2.68                  |
| 25021              | Norfolk, MA               | -0.239               | 2.26                      | 20.92                 |
| 25023              | Plymouth, MA              | -0.189               | 5.63                      | 23.03                 |
| 25025              | Suffolk, MA               | -0.157               | 10.09                     | 73.79                 |
| 25027              | Worcester, MA             | -0.136               | 14.61                     | 40.96                 |
| 26001              | Alcona, MI                | -0.149               | 11.94                     | 25.57                 |
| 26003              | Alger, MI                 | -0.023               | 48.17                     | 44.81                 |
| 26005              | Allegan, MI               | 0.005                | 55.94                     | 17.58                 |
| 26007              | Alpena, MI                | -0.098               | 25.44                     | 34.08                 |
| 26009              | Antrim, MI                | -0.129               | 16.3                      | 11.56                 |
| 26011              | Arenac, MI                | -0.007               | 52.5                      | 50.54                 |
| 26013              | Baraga, MI                | 0.061                | 71.12                     | 65.99                 |
| 26015              | Barry, MI                 | -0.036               | 44.35                     | 8.69                  |
| 26017              | Bay, MI                   | -0.107               | 22.25                     | 44.04                 |
| 26019              | Benzie, MI                | -0.119               | 19.32                     | 10.51                 |
| 26021              | Berrien, MI               | -0.076               | 32.22                     | 64.75                 |
| 26023              | Branch, MI                | 0.016                | 59.69                     | 63.15                 |
| 26025              | Calhoun, MI               | -0.097               | 25.57                     | 72.42                 |
| 26027              | Cass, MI                  | -0.037               | 44                        | 32.8                  |
| 26029              | Charlevoix, MI            | -0.155               | 10.44                     | 9.68                  |
| 26031              | Cheboygan, MI             | -0.096               | 26.2                      | 28.6                  |
| 26033              | Chippewa, MI              | -0.012               | 51.42                     | 72.45                 |
| 26035              | Clare, MI                 | 0.102                | 79.97                     | 77.2                  |
| 26037              | Clinton, MI               | -0.131               | 15.73                     | 4.01                  |
| 26039              | Crawford, MI              | -0.044               | 41.9                      | 36.97                 |
| 26041              | Delta, MI                 | -0.086               | 29.42                     | 35.45                 |
| 26043              | Dickinson, MI             | -0.087               | 29.1                      | 22.96                 |
| 26045              | Eaton, MI                 | -0.152               | 11.11                     | 31.31                 |
| 26047              | Emmet, MI                 | -0.141               | 13.59                     | 13.57                 |

| <b>County FIPS</b> | <b>County Description</b> | <b>DOS-SVI Index</b> | <b>DOS-SVI Percentile</b> | <b>SVI Percentile</b> |
|--------------------|---------------------------|----------------------|---------------------------|-----------------------|
| 26049              | Genesee, MI               | -0.076               | 32.31                     | 66.24                 |
| 26051              | Gladwin, MI               | 0.011                | 58.04                     | 53.98                 |
| 26053              | Gogebic, MI               | -0.093               | 26.97                     | 40.38                 |
| 26055              | Grand Traverse, MI        | -0.103               | 23.91                     | 18.03                 |
| 26057              | Gratiot, MI               | 0.009                | 57.5                      | 60.35                 |
| 26059              | Hillsdale, MI             | 0.035                | 64.82                     | 50.19                 |
| 26061              | Houghton, MI              | 0.075                | 74.91                     | 49.62                 |
| 26063              | Huron, MI                 | -0.077               | 32                        | 27.45                 |
| 26065              | Ingham, MI                | -0.115               | 20.22                     | 57.42                 |
| 26067              | Ionia, MI                 | 0.055                | 69.47                     | 47.8                  |
| 26069              | Iosco, MI                 | -0.103               | 23.88                     | 44.94                 |
| 26071              | Iron, MI                  | -0.155               | 10.57                     | 28.25                 |
| 26073              | Isabella, MI              | -0.027               | 47.12                     | 60.16                 |
| 26075              | Jackson, MI               | -0.051               | 39.89                     | 55.06                 |
| 26077              | Kalamazoo, MI             | -0.141               | 13.66                     | 40.7                  |
| 26079              | Kalkaska, MI              | 0.064                | 72.14                     | 50.83                 |
| 26081              | Kent, MI                  | -0.112               | 21.04                     | 47.61                 |
| 26083              | Keweenaw, MI              | -0.207               | 4.17                      | 7.87                  |
| 26085              | Lake, MI                  | 0.128                | 84.18                     | 78.18                 |
| 26087              | Lapeer, MI                | -0.025               | 47.56                     | 23.82                 |
| 26089              | Leelanau, MI              | -0.22                | 3.53                      | 2.45                  |
| 26091              | Lenawee, MI               | -0.073               | 32.92                     | 40.76                 |
| 26093              | Livingston, MI            | -0.115               | 20.54                     | 0.67                  |
| 26095              | Luce, MI                  | 0.039                | 65.81                     | 53.38                 |
| 26097              | Mackinac, MI              | -0.062               | 35.98                     | 64.52                 |
| 26099              | Macomb, MI                | -0.129               | 16.27                     | 32.96                 |
| 26101              | Manistee, MI              | -0.039               | 43.59                     | 39.97                 |
| 26103              | Marquette, MI             | -0.081               | 31.23                     | 30.57                 |
| 26105              | Mason, MI                 | -0.092               | 27.57                     | 33.76                 |
| 26107              | Mecosta, MI               | 0.061                | 71.09                     | 59.75                 |
| 26109              | Menominee, MI             | -0.095               | 26.46                     | 27.64                 |
| 26111              | Midland, MI               | -0.082               | 30.4                      | 16.18                 |
| 26113              | Missaukee, MI             | 0.106                | 80.58                     | 47.55                 |
| 26115              | Monroe, MI                | -0.078               | 31.77                     | 14.94                 |
| 26117              | Montcalm, MI              | 0.047                | 67.62                     | 61.27                 |
| 26119              | Montmorency, MI           | -0.048               | 40.59                     | 37.29                 |
| 26121              | Muskegon, MI              | -0.02                | 49.22                     | 70.35                 |
| 26123              | Newaygo, MI               | 0.096                | 78.48                     | 63.18                 |
| 26125              | Oakland, MI               | -0.214               | 3.76                      | 11.4                  |
| 26127              | Oceana, MI                | 0.123                | 83.7                      | 85.8                  |
| 26129              | Ogemaw, MI                | 0.02                 | 60.68                     | 62.58                 |
| 26131              | Ontonagon, MI             | -0.135               | 14.9                      | 27.32                 |
| 26133              | Osceola, MI               | 0.1                  | 79.37                     | 74.01                 |
| 26135              | Oscoda, MI                | 0.077                | 75.2                      | 66.94                 |
| 26137              | Otsego, MI                | -0.016               | 50.21                     | 36.94                 |
| 26139              | Ottawa, MI                | -0.057               | 37.95                     | 21.72                 |
| 26141              | Presque Isle, MI          | -0.116               | 20.06                     | 27.61                 |
| 26143              | Roscommon, MI             | -0.087               | 29                        | 46.27                 |
| 26145              | Saginaw, MI               | -0.091               | 27.89                     | 70.48                 |
| 26147              | St. Clair, MI             | -0.071               | 33.65                     | 27.9                  |
| 26149              | St. Joseph, MI            | 0.015                | 59.28                     | 65.16                 |
| 26151              | Sanilac, MI               | -0.003               | 53.93                     | 48.34                 |
| 26153              | Schoolcraft, MI           | -0.066               | 35.02                     | 54.52                 |
| 26155              | Shiawassee, MI            | -0.09                | 27.98                     | 13.25                 |
| 26157              | Tuscola, MI               | 0.025                | 62.15                     | 39.59                 |

| <b>County FIPS</b> | <b>County Description</b> | <b>DOS-SVI Index</b> | <b>DOS-SVI Percentile</b> | <b>SVI Percentile</b> |
|--------------------|---------------------------|----------------------|---------------------------|-----------------------|
| 26159              | Van Buren, MI             | 0.027                | 62.5                      | 65.89                 |
| 26161              | Washtenaw, MI             | -0.168               | 8.18                      | 22.36                 |
| 26163              | Wayne, MI                 | -0.065               | 35.4                      | 87.23                 |
| 26165              | Wexford, MI               | 0.028                | 62.62                     | 50.35                 |
| 27001              | Aitkin, MN                | -0.121               | 18.46                     | 30.83                 |
| 27003              | Anoka, MN                 | -0.143               | 13.02                     | 14.04                 |
| 27005              | Becker, MN                | -0.062               | 36.29                     | 29.9                  |
| 27007              | Beltrami, MN              | 0.015                | 59.44                     | 77.71                 |
| 27009              | Benton, MN                | -0.094               | 26.62                     | 43.18                 |
| 27011              | Big Stone, MN             | -0.15                | 11.78                     | 20.06                 |
| 27013              | Blue Earth, MN            | -0.135               | 14.84                     | 28.38                 |
| 27015              | Brown, MN                 | -0.176               | 7.1                       | 12.74                 |
| 27017              | Carlton, MN               | -0.027               | 46.93                     | 26.66                 |
| 27019              | Carver, MN                | -0.125               | 17.45                     | 1.24                  |
| 27021              | Cass, MN                  | -0.061               | 36.61                     | 35                    |
| 27023              | Chippewa, MN              | -0.168               | 8.25                      | 35.22                 |
| 27025              | Chisago, MN               | -0.081               | 31.04                     | 5.92                  |
| 27027              | Clay, MN                  | -0.123               | 18.08                     | 22.17                 |
| 27029              | Clearwater, MN            | 0.087                | 76.89                     | 79.17                 |
| 27031              | Cook, MN                  | 0.008                | 57.12                     | 20.29                 |
| 27033              | Cottonwood, MN            | -0.067               | 34.86                     | 47.26                 |
| 27035              | Crow Wing, MN             | -0.151               | 11.59                     | 12.23                 |
| 27037              | Dakota, MN                | -0.235               | 2.52                      | 12.07                 |
| 27039              | Dodge, MN                 | -0.128               | 16.36                     | 5.73                  |
| 27041              | Douglas, MN               | -0.196               | 5.19                      | 4.46                  |
| 27043              | Faribault, MN             | -0.17                | 7.8                       | 15.7                  |
| 27045              | Fillmore, MN              | -0.052               | 39.64                     | 21.69                 |
| 27047              | Freeborn, MN              | -0.204               | 4.46                      | 43.28                 |
| 27049              | Goodhue, MN               | -0.139               | 13.95                     | 17.07                 |
| 27051              | Grant, MN                 | -0.151               | 11.27                     | 9.46                  |
| 27053              | Hennepin, MN              | -0.252               | 1.82                      | 30.92                 |
| 27055              | Houston, MN               | -0.142               | 13.5                      | 1.85                  |
| 27057              | Hubbard, MN               | -0.058               | 37.66                     | 20.51                 |
| 27059              | Isanti, MN                | -0.095               | 26.49                     | 10.22                 |
| 27061              | Itasca, MN                | -0.035               | 44.7                      | 32.93                 |
| 27063              | Jackson, MN               | -0.161               | 9.11                      | 3.06                  |
| 27065              | Kanabec, MN               | -0.012               | 51.54                     | 28.41                 |
| 27067              | Kandiyohi, MN             | -0.12                | 19.17                     | 40.64                 |
| 27069              | Kittson, MN               | -0.109               | 21.78                     | 9.97                  |
| 27071              | Koochiching, MN           | -0.136               | 14.58                     | 43.66                 |
| 27073              | Lac qui Parle, MN         | -0.206               | 4.23                      | 10.06                 |
| 27075              | Lake, MN                  | -0.165               | 8.69                      | 11.02                 |
| 27077              | Lake of the Woods, MN     | -0.022               | 48.55                     | 15.76                 |
| 27079              | Le Sueur, MN              | -0.098               | 25.06                     | 11.46                 |
| 27081              | Lincoln, MN               | -0.131               | 15.89                     | 6.66                  |
| 27083              | Lyon, MN                  | -0.092               | 27.25                     | 45.32                 |
| 27085              | McLeod, MN                | -0.186               | 6.05                      | 12.61                 |
| 27087              | Mahnomen, MN              | 0.07                 | 73.73                     | 87.17                 |
| 27089              | Marshall, MN              | -0.092               | 27.32                     | 14.11                 |
| 27091              | Martin, MN                | -0.194               | 5.25                      | 19.33                 |
| 27093              | Meeker, MN                | -0.057               | 38.14                     | 18.69                 |
| 27095              | Mille Lacs, MN            | -0.023               | 48.07                     | 59.17                 |
| 27097              | Morrison, MN              | -0.055               | 38.75                     | 26.82                 |
| 27099              | Mower, MN                 | -0.1                 | 24.61                     | 62.83                 |
| 27101              | Murray, MN                | -0.185               | 6.11                      | 10.64                 |

| <b>County FIPS</b> | <b>County Description</b> | <b>DOS-SVI Index</b> | <b>DOS-SVI Percentile</b> | <b>SVI Percentile</b> |
|--------------------|---------------------------|----------------------|---------------------------|-----------------------|
| 27103              | Nicollet, MN              | -0.132               | 15.6                      | 25.13                 |
| 27105              | Nobles, MN                | -0.145               | 12.73                     | 81.5                  |
| 27107              | Norman, MN                | -0.06                | 36.99                     | 32.48                 |
| 27109              | Olmsted, MN               | -0.146               | 12.48                     | 25.99                 |
| 27111              | Otter Tail, MN            | -0.101               | 24.42                     | 20.99                 |
| 27113              | Pennington, MN            | -0.111               | 21.43                     | 30.16                 |
| 27115              | Pine, MN                  | 0.015                | 59.34                     | 46.31                 |
| 27117              | Pipestone, MN             | -0.113               | 21.01                     | 46.46                 |
| 27119              | Polk, MN                  | -0.092               | 27.44                     | 36.69                 |
| 27121              | Pope, MN                  | -0.142               | 13.37                     | 3.15                  |
| 27123              | Ramsey, MN                | -0.184               | 6.14                      | 63.34                 |
| 27125              | Red Lake, MN              | -0.032               | 45.65                     | 15.25                 |
| 27127              | Redwood, MN               | -0.147               | 12.26                     | 22.93                 |
| 27129              | Renville, MN              | -0.136               | 14.52                     | 19.68                 |
| 27131              | Rice, MN                  | -0.056               | 38.27                     | 39.3                  |
| 27133              | Rock, MN                  | -0.102               | 24.16                     | 15.32                 |
| 27135              | Roseau, MN                | -0.026               | 47.15                     | 24.78                 |
| 27137              | St. Louis, MN             | -0.097               | 25.82                     | 31.18                 |
| 27139              | Scott, MN                 | -0.053               | 39.26                     | 11.08                 |
| 27141              | Sherburne, MN             | -0.078               | 31.68                     | 8.85                  |
| 27143              | Sibley, MN                | -0.127               | 16.75                     | 13.15                 |
| 27145              | Stearns, MN               | -0.105               | 22.76                     | 38.85                 |
| 27147              | Steele, MN                | -0.066               | 35.18                     | 30.13                 |
| 27149              | Stevens, MN               | -0.121               | 18.5                      | 22.58                 |
| 27151              | Swift, MN                 | -0.169               | 8.09                      | 32.13                 |
| 27153              | Todd, MN                  | 0.033                | 64.34                     | 48.12                 |
| 27155              | Traverse, MN              | -0.158               | 9.87                      | 26.02                 |
| 27157              | Wabasha, MN               | -0.142               | 13.44                     | 5.89                  |
| 27159              | Wadena, MN                | 0                    | 54.63                     | 65.54                 |
| 27161              | Waseca, MN                | -0.093               | 27.03                     | 25.03                 |
| 27163              | Washington, MN            | -0.176               | 7.16                      | 6.82                  |
| 27165              | Watonwan, MN              | -0.186               | 5.89                      | 51.91                 |
| 27167              | Wilkin, MN                | -0.126               | 17                        | 19.24                 |
| 27169              | Winona, MN                | -0.093               | 27.16                     | 21.15                 |
| 27171              | Wright, MN                | -0.036               | 44.51                     | 4.62                  |
| 27173              | Yellow Medicine, MN       | -0.143               | 13.12                     | 33.44                 |
| 28001              | Adams, MS                 | -0.036               | 44.41                     | 99.14                 |
| 28003              | Alcorn, MS                | 0.075                | 74.82                     | 69.55                 |
| 28005              | Amite, MS                 | 0.094                | 78.25                     | 81.91                 |
| 28007              | Attala, MS                | 0.185                | 91.4                      | 98.44                 |
| 28009              | Benton, MS                | 0.103                | 80.2                      | 66.05                 |
| 28011              | Bolivar, MS               | 0.044                | 66.98                     | 96.75                 |
| 28013              | Calhoun, MS               | 0.133                | 85                        | 96.5                  |
| 28015              | Carroll, MS               | 0.169                | 89.88                     | 63.03                 |
| 28017              | Chickasaw, MS             | 0.085                | 76.63                     | 91.43                 |
| 28019              | Choctaw, MS               | 0.174                | 90.42                     | 85.41                 |
| 28021              | Claiborne, MS             | 0.326                | 98.12                     | 99.2                  |
| 28023              | Clarke, MS                | 0.037                | 65.2                      | 66.69                 |
| 28025              | Clay, MS                  | -0.032               | 45.81                     | 70.54                 |
| 28027              | Coahoma, MS               | 0.117                | 82.46                     | 93.22                 |
| 28029              | Copiah, MS                | 0.193                | 92.01                     | 94.11                 |
| 28031              | Covington, MS             | 0.155                | 87.84                     | 78.79                 |
| 28033              | DeSoto, MS                | -0.047               | 40.85                     | 30.32                 |
| 28035              | Forrest, MS               | 0.011                | 58.17                     | 93.66                 |
| 28037              | Franklin, MS              | 0.068                | 73.16                     | 57.17                 |

| <b>County FIPS</b> | <b>County Description</b> | <b>DOS-SVI Index</b> | <b>DOS-SVI Percentile</b> | <b>SVI Percentile</b> |
|--------------------|---------------------------|----------------------|---------------------------|-----------------------|
| 28039              | George, MS                | 0.225                | 94.84                     | 61.37                 |
| 28041              | Greene, MS                | 0.322                | 98.06                     | 60.67                 |
| 28043              | Grenada, MS               | 0.028                | 62.59                     | 87.71                 |
| 28045              | Hancock, MS               | -0.052               | 39.6                      | 59.24                 |
| 28047              | Harrison, MS              | -0.04                | 43.17                     | 88.38                 |
| 28049              | Hinds, MS                 | -0.057               | 37.85                     | 87.42                 |
| 28051              | Holmes, MS                | 0.274                | 97.07                     | 98.18                 |
| 28053              | Humphreys, MS             | 0.211                | 93.82                     | 93.69                 |
| 28055              | Issaquena, MS             | 0.344                | 98.34                     | 95.1                  |
| 28057              | Itawamba, MS              | 0.062                | 71.38                     | 54.87                 |
| 28059              | Jackson, MS               | -0.08                | 31.49                     | 54.33                 |
| 28061              | Jasper, MS                | 0.05                 | 68.48                     | 76.91                 |
| 28063              | Jefferson, MS             | 0.237                | 95.54                     | 96.37                 |
| 28065              | Jefferson Davis, MS       | 0.081                | 75.84                     | 84.39                 |
| 28067              | Jones, MS                 | 0.078                | 75.42                     | 89.2                  |
| 28069              | Kemper, MS                | 0.109                | 81.12                     | 92.74                 |
| 28071              | Lafayette, MS             | -0.043               | 42.44                     | 50.96                 |
| 28073              | Lamar, MS                 | 0.011                | 58.07                     | 53.06                 |
| 28075              | Lauderdale, MS            | 0.039                | 65.84                     | 92.83                 |
| 28077              | Lawrence, MS              | 0.152                | 87.42                     | 66.34                 |
| 28079              | Leake, MS                 | 0.197                | 92.52                     | 99.46                 |
| 28081              | Lee, MS                   | 0.066                | 72.53                     | 79.52                 |
| 28083              | Leflore, MS               | 0.11                 | 81.28                     | 96.53                 |
| 28085              | Lincoln, MS               | 0.121                | 83.29                     | 75.86                 |
| 28087              | Lowndes, MS               | -0.038               | 43.87                     | 79.75                 |
| 28089              | Madison, MS               | -0.155               | 10.6                      | 28.98                 |
| 28091              | Marion, MS                | 0.231                | 95.19                     | 93.5                  |
| 28093              | Marshall, MS              | 0.04                 | 66                        | 69.04                 |
| 28095              | Monroe, MS                | 0.068                | 72.94                     | 63.98                 |
| 28097              | Montgomery, MS            | -0.016               | 50.46                     | 89.14                 |
| 28099              | Neshoba, MS               | 0.312                | 97.8                      | 96.85                 |
| 28101              | Newton, MS                | 0.166                | 89.53                     | 92.13                 |
| 28103              | Noxubee, MS               | 0.284                | 97.29                     | 98.6                  |
| 28105              | Oktibbeha, MS             | 0.012                | 58.64                     | 64.2                  |
| 28107              | Panola, MS                | 0.162                | 89.05                     | 89.33                 |
| 28109              | Pearl River, MS           | 0.103                | 80.13                     | 70.51                 |
| 28111              | Perry, MS                 | 0.181                | 90.96                     | 70.86                 |
| 28113              | Pike, MS                  | 0.102                | 79.94                     | 98.82                 |
| 28115              | Pontotoc, MS              | 0.239                | 95.61                     | 89.62                 |
| 28117              | Prentiss, MS              | 0.166                | 89.56                     | 85.13                 |
| 28119              | Quitman, MS               | 0.313                | 97.83                     | 95.45                 |
| 28121              | Rankin, MS                | -0.014               | 50.91                     | 31.27                 |
| 28123              | Scott, MS                 | 0.169                | 89.91                     | 98.5                  |
| 28125              | Sharkey, MS               | 0.347                | 98.44                     | 97.29                 |
| 28127              | Simpson, MS               | 0.235                | 95.42                     | 90.73                 |
| 28129              | Smith, MS                 | 0.061                | 70.97                     | 47.32                 |
| 28131              | Stone, MS                 | 0.214                | 93.98                     | 60.45                 |
| 28133              | Sunflower, MS             | 0.222                | 94.72                     | 94.94                 |
| 28135              | Tallahatchie, MS          | 0.269                | 96.75                     | 97.36                 |
| 28137              | Tate, MS                  | 0.2                  | 92.71                     | 86.5                  |
| 28139              | Tippah, MS                | 0.183                | 91.12                     | 86.46                 |
| 28141              | Tishomingo, MS            | 0.14                 | 85.99                     | 66.59                 |
| 28143              | Tunica, MS                | 0.026                | 62.43                     | 97.2                  |
| 28145              | Union, MS                 | 0.145                | 86.6                      | 82.77                 |
| 28147              | Walthall, MS              | 0.148                | 86.98                     | 86.11                 |

| <b>County FIPS</b> | <b>County Description</b> | <b>DOS-SVI Index</b> | <b>DOS-SVI Percentile</b> | <b>SVI Percentile</b> |
|--------------------|---------------------------|----------------------|---------------------------|-----------------------|
| 28149              | Warren, MS                | 0.003                | 55.52                     | 86.05                 |
| 28151              | Washington, MS            | 0.097                | 78.8                      | 97.83                 |
| 28153              | Wayne, MS                 | 0.153                | 87.55                     | 89.97                 |
| 28155              | Webster, MS               | 0.01                 | 57.72                     | 59.62                 |
| 28157              | Wilkinson, MS             | 0.268                | 96.66                     | 91.69                 |
| 28159              | Winston, MS               | 0.086                | 76.86                     | 93.06                 |
| 28161              | Yalobusha, MS             | 0.114                | 81.95                     | 73.47                 |
| 28163              | Yazoo, MS                 | 0.247                | 95.99                     | 99.52                 |
| 29001              | Adair, MO                 | 0.024                | 61.95                     | 45.48                 |
| 29003              | Andrew, MO                | -0.035               | 44.6                      | 3.25                  |
| 29005              | Atchison, MO              | -0.12                | 19.2                      | 7.36                  |
| 29007              | Audrain, MO               | 0.058                | 70.3                      | 61.5                  |
| 29009              | Barry, MO                 | 0.111                | 81.6                      | 70.99                 |
| 29011              | Barton, MO                | 0.063                | 71.76                     | 59.94                 |
| 29013              | Bates, MO                 | 0.057                | 69.79                     | 38.57                 |
| 29015              | Benton, MO                | 0.061                | 71.31                     | 55.13                 |
| 29017              | Bollinger, MO             | 0.106                | 80.71                     | 47.93                 |
| 29019              | Boone, MO                 | -0.082               | 30.5                      | 29.27                 |
| 29021              | Buchanan, MO              | -0.026               | 47.18                     | 71.82                 |
| 29023              | Butler, MO                | 0.073                | 74.24                     | 81.72                 |
| 29025              | Caldwell, MO              | 0.135                | 85.32                     | 45.13                 |
| 29027              | Callaway, MO              | 0.021                | 61.29                     | 32.32                 |
| 29029              | Camden, MO                | -0.202               | 4.65                      | 33.63                 |
| 29031              | Cape Girardeau, MO        | -0.023               | 48.27                     | 41.18                 |
| 29033              | Carroll, MO               | 0.035                | 64.95                     | 53.25                 |
| 29035              | Carter, MO                | 0.167                | 89.69                     | 74.55                 |
| 29037              | Cass, MO                  | -0.064               | 35.63                     | 11.88                 |
| 29039              | Cedar, MO                 | 0.044                | 67.02                     | 64.11                 |
| 29041              | Chariton, MO              | 0.006                | 56.26                     | 18.98                 |
| 29043              | Christian, MO             | 0.001                | 54.7                      | 14.97                 |
| 29045              | Clark, MO                 | 0.017                | 59.88                     | 34.2                  |
| 29047              | Clay, MO                  | -0.151               | 11.3                      | 13.63                 |
| 29049              | Clinton, MO               | -0.084               | 29.86                     | 16.43                 |
| 29051              | Cole, MO                  | -0.101               | 24.32                     | 25.83                 |
| 29053              | Cooper, MO                | 0.019                | 60.49                     | 38.92                 |
| 29055              | Crawford, MO              | 0.129                | 84.37                     | 75.54                 |
| 29057              | Dade, MO                  | 0.096                | 78.45                     | 66.37                 |
| 29059              | Dallas, MO                | 0.119                | 82.94                     | 70.19                 |
| 29061              | Daviess, MO               | 0.109                | 81.09                     | 47.07                 |
| 29063              | DeKalb, MO                | 0.163                | 89.14                     | 40.54                 |
| 29065              | Dent, MO                  | 0.111                | 81.5                      | 63.12                 |
| 29067              | Douglas, MO               | 0.107                | 80.77                     | 52.32                 |
| 29069              | Dunklin, MO               | 0.091                | 77.81                     | 95.8                  |
| 29071              | Franklin, MO              | -0.038               | 43.68                     | 14.59                 |
| 29073              | Gasconade, MO             | -0.07                | 34.07                     | 8.54                  |
| 29075              | Gentry, MO                | 0.058                | 70.17                     | 43.89                 |
| 29077              | Greene, MO                | -0.08                | 31.42                     | 43.95                 |
| 29079              | Grundy, MO                | -0.013               | 51.23                     | 61.85                 |
| 29081              | Harrison, MO              | -0.019               | 49.41                     | 74.17                 |
| 29083              | Henry, MO                 | 0.047                | 67.53                     | 59.59                 |
| 29085              | Hickory, MO               | 0.02                 | 60.59                     | 46.72                 |
| 29087              | Holt, MO                  | -0.068               | 34.51                     | 19.59                 |
| 29089              | Howard, MO                | 0.037                | 65.36                     | 40.41                 |
| 29091              | Howell, MO                | 0.083                | 76.15                     | 67.17                 |
| 29093              | Iron, MO                  | 0.133                | 84.94                     | 78.22                 |

| <b>County FIPS</b> | <b>County Description</b> | <b>DOS-SVI Index</b> | <b>DOS-SVI Percentile</b> | <b>SVI Percentile</b> |
|--------------------|---------------------------|----------------------|---------------------------|-----------------------|
| 29095              | Jackson, MO               | -0.167               | 8.44                      | 53.54                 |
| 29097              | Jasper, MO                | 0.012                | 58.48                     | 65.64                 |
| 29099              | Jefferson, MO             | -0.024               | 47.98                     | 18.63                 |
| 29101              | Johnson, MO               | 0.096                | 78.51                     | 35.06                 |
| 29103              | Knox, MO                  | 0.019                | 60.36                     | 55.7                  |
| 29105              | Laclede, MO               | 0.174                | 90.32                     | 61.78                 |
| 29107              | Lafayette, MO             | -0.021               | 48.74                     | 38.82                 |
| 29109              | Lawrence, MO              | 0.11                 | 81.44                     | 78.66                 |
| 29111              | Lewis, MO                 | 0.105                | 80.42                     | 44.65                 |
| 29113              | Lincoln, MO               | 0.068                | 73                        | 29.39                 |
| 29115              | Linn, MO                  | -0.062               | 36.07                     | 27.2                  |
| 29117              | Livingston, MO            | 0.001                | 54.82                     | 37.48                 |
| 29119              | McDonald, MO              | 0.257                | 96.43                     | 86.31                 |
| 29121              | Macon, MO                 | 0.013                | 58.71                     | 58.6                  |
| 29123              | Madison, MO               | 0.135                | 85.39                     | 47.77                 |
| 29125              | Maries, MO                | 0.074                | 74.59                     | 51.18                 |
| 29127              | Marion, MO                | -0.008               | 52.34                     | 54.59                 |
| 29129              | Mercer, MO                | 0.058                | 70.39                     | 30.45                 |
| 29131              | Miller, MO                | 0.02                 | 60.78                     | 50.1                  |
| 29133              | Mississippi, MO           | 0.143                | 86.31                     | 90.76                 |
| 29135              | Moniteau, MO              | 0.141                | 86.15                     | 51.43                 |
| 29137              | Monroe, MO                | -0.012               | 51.67                     | 38.76                 |
| 29139              | Montgomery, MO            | 0.025                | 62.11                     | 53.31                 |
| 29141              | Morgan, MO                | 0.045                | 67.21                     | 62.9                  |
| 29143              | New Madrid, MO            | 0.073                | 74.37                     | 89.68                 |
| 29145              | Newton, MO                | 0.035                | 64.72                     | 43.41                 |
| 29147              | Nodaway, MO               | 0.003                | 55.59                     | 22.2                  |
| 29149              | Oregon, MO                | 0.047                | 67.72                     | 48.85                 |
| 29151              | Osage, MO                 | 0.021                | 60.9                      | 4.97                  |
| 29153              | Ozark, MO                 | 0.09                 | 77.62                     | 58.25                 |
| 29155              | Pemiscot, MO              | 0.137                | 85.61                     | 93.03                 |
| 29157              | Perry, MO                 | 0.009                | 57.34                     | 23.12                 |
| 29159              | Pettis, MO                | -0.002               | 54.06                     | 80.35                 |
| 29161              | Phelps, MO                | 0.032                | 63.9                      | 65.96                 |
| 29163              | Pike, MO                  | 0.045                | 67.33                     | 53.76                 |
| 29165              | Platte, MO                | -0.207               | 4.14                      | 9.59                  |
| 29167              | Polk, MO                  | 0.069                | 73.38                     | 59.87                 |
| 29169              | Pulaski, MO               | 0.161                | 88.89                     | 65.03                 |
| 29171              | Putnam, MO                | -0.044               | 42.12                     | 57.64                 |
| 29173              | Ralls, MO                 | -0.03                | 46.39                     | 10.45                 |
| 29175              | Randolph, MO              | 0.071                | 73.83                     | 55.54                 |
| 29177              | Ray, MO                   | -0.031               | 46.16                     | 25.73                 |
| 29179              | Reynolds, MO              | 0.068                | 73.19                     | 55.73                 |
| 29181              | Ripley, MO                | 0.167                | 89.72                     | 71.5                  |
| 29183              | St. Charles, MO           | -0.159               | 9.68                      | 3.63                  |
| 29185              | St. Clair, MO             | 0                    | 54.57                     | 49.87                 |
| 29186              | Ste. Genevieve, MO        | -0.07                | 33.91                     | 18.85                 |
| 29187              | St. Francois, MO          | 0.101                | 79.62                     | 70.16                 |
| 29189              | St. Louis, MO             | -0.227               | 2.99                      | 26.11                 |
| 29195              | Saline, MO                | -0.001               | 54.41                     | 81.62                 |
| 29197              | Schuyler, MO              | 0.086                | 76.79                     | 38.31                 |
| 29199              | Scotland, MO              | 0.207                | 93.25                     | 53.03                 |
| 29201              | Scott, MO                 | 0.047                | 67.65                     | 78.44                 |
| 29203              | Shannon, MO               | 0.146                | 86.76                     | 64.49                 |
| 29205              | Shelby, MO                | 0.029                | 63.2                      | 39.84                 |

| <b>County FIPS</b> | <b>County Description</b> | <b>DOS-SVI Index</b> | <b>DOS-SVI Percentile</b> | <b>SVI Percentile</b> |
|--------------------|---------------------------|----------------------|---------------------------|-----------------------|
| 29207              | Stoddard, MO              | 0.053                | 69.05                     | 46.43                 |
| 29209              | Stone, MO                 | -0.073               | 33.24                     | 34.87                 |
| 29211              | Sullivan, MO              | -0.007               | 52.66                     | 62.96                 |
| 29213              | Taney, MO                 | -0.059               | 37.25                     | 82.17                 |
| 29215              | Texas, MO                 | 0.116                | 82.36                     | 83.03                 |
| 29217              | Vernon, MO                | 0.055                | 69.5                      | 45.1                  |
| 29219              | Warren, MO                | 0.108                | 80.9                      | 38.41                 |
| 29221              | Washington, MO            | 0.271                | 96.88                     | 79.04                 |
| 29223              | Wayne, MO                 | 0.237                | 95.51                     | 76.46                 |
| 29225              | Webster, MO               | 0.201                | 92.84                     | 63.85                 |
| 29227              | Worth, MO                 | -0.074               | 32.82                     | 22.39                 |
| 29229              | Wright, MO                | 0.173                | 90.23                     | 90.06                 |
| 29510              | St. Louis City, MO        | -0.108               | 21.9                      | 77.96                 |
| 30001              | Beaverhead, MT            | -0.013               | 51.07                     | 25.16                 |
| 30003              | Big Horn, MT              | 0.664                | 99.65                     | 82.74                 |
| 30005              | Blaine, MT                | 0.353                | 98.5                      | 91.5                  |
| 30007              | Broadwater, MT            | -0.103               | 23.62                     | 4.2                   |
| 30009              | Carbon, MT                | -0.154               | 10.76                     | 4.33                  |
| 30011              | Carter, MT                | -0.042               | 42.53                     | 4.87                  |
| 30013              | Cascade, MT               | -0.06                | 37.15                     | 41.02                 |
| 30015              | Chouteau, MT              | 0.028                | 62.85                     | 47.99                 |
| 30017              | Custer, MT                | -0.104               | 23.34                     | 29.01                 |
| 30019              | Daniels, MT               | -0.21                | 3.95                      | 2.42                  |
| 30021              | Dawson, MT                | -0.016               | 50.24                     | 7.52                  |
| 30023              | Deer Lodge, MT            | -0.061               | 36.68                     | 47.17                 |
| 30025              | Fallon, MT                | -0.004               | 53.52                     | 2.17                  |
| 30027              | Fergus, MT                | -0.04                | 43.04                     | 23.76                 |
| 30029              | Flathead, MT              | -0.018               | 49.7                      | 9.24                  |
| 30031              | Gallatin, MT              | -0.069               | 34.35                     | 4.27                  |
| 30033              | Garfield, MT              | 0.022                | 61.51                     | 0.76                  |
| 30035              | Glacier, MT               | 0.281                | 97.26                     | 85.83                 |
| 30037              | Golden Valley, MT         | -0.154               | 10.82                     | 5.19                  |
| 30039              | Granite, MT               | -0.035               | 44.57                     | 7.64                  |
| 30041              | Hill, MT                  | -0.002               | 54                        | 69.84                 |
| 30043              | Jefferson, MT             | -0.062               | 36.39                     | 4.81                  |
| 30045              | Judith Basin, MT          | -0.136               | 14.77                     | 1.62                  |
| 30047              | Lake, MT                  | 0.018                | 60.11                     | 64.68                 |
| 30049              | Lewis and Clark, MT       | -0.079               | 31.65                     | 12.58                 |
| 30051              | Liberty, MT               | -0.128               | 16.4                      | 40.99                 |
| 30053              | Lincoln, MT               | -0.003               | 53.9                      | 41.94                 |
| 30055              | McCone, MT                | 0.008                | 56.8                      | 7.74                  |
| 30057              | Madison, MT               | -0.232               | 2.77                      | 17.26                 |
| 30059              | Meagher, MT               | -0.069               | 34.26                     | 4.65                  |
| 30061              | Mineral, MT               | 0.008                | 56.96                     | 56.21                 |
| 30063              | Missoula, MT              | -0.092               | 27.28                     | 17.8                  |
| 30065              | Musselshell, MT           | 0.166                | 89.59                     | 35.51                 |
| 30067              | Park, MT                  | -0.112               | 21.11                     | 6.88                  |
| 30069              | Petroleum, MT             | -0.029               | 46.55                     | 0.29                  |
| 30071              | Phillips, MT              | 0.133                | 84.97                     | 41.46                 |
| 30073              | Pondera, MT               | 0.037                | 65.23                     | 82.96                 |
| 30075              | Powder River, MT          | -0.146               | 12.51                     | 3.92                  |
| 30077              | Powell, MT                | 0.071                | 73.96                     | 25.45                 |
| 30079              | Prairie, MT               | -0.05                | 40.12                     | 7.58                  |
| 30081              | Ravalli, MT               | -0.058               | 37.73                     | 18.6                  |
| 30083              | Richland, MT              | 0.025                | 62.34                     | 21.21                 |



| <b>County FIPS</b> | <b>County Description</b> | <b>DOS-SVI Index</b> | <b>DOS-SVI Percentile</b> | <b>SVI Percentile</b> |
|--------------------|---------------------------|----------------------|---------------------------|-----------------------|
| 30085              | Roosevelt, MT             | 0.303                | 97.48                     | 88.79                 |
| 30087              | Rosebud, MT               | 0.269                | 96.69                     | 60.7                  |
| 30089              | Sanders, MT               | -0.025               | 47.5                      | 34.78                 |
| 30091              | Sheridan, MT              | -0.048               | 40.78                     | 9.49                  |
| 30093              | Silver Bow, MT            | -0.038               | 43.71                     | 52.58                 |
| 30095              | Stillwater, MT            | -0.048               | 40.47                     | 3.6                   |
| 30097              | Sweet Grass, MT           | -0.176               | 7                         | 0.86                  |
| 30099              | Teton, MT                 | 0.058                | 70.23                     | 29.81                 |
| 30101              | Toole, MT                 | 0.023                | 61.57                     | 47.68                 |
| 30103              | Treasure, MT              | -0.052               | 39.51                     | 5.67                  |
| 30105              | Valley, MT                | -0.092               | 27.35                     | 11.62                 |
| 30107              | Wheatland, MT             | 0.099                | 79.34                     | 54.36                 |
| 30109              | Wibaux, MT                | -0.059               | 37.41                     | 39.33                 |
| 30111              | Yellowstone, MT           | -0.045               | 41.61                     | 24.97                 |
| 31001              | Adams, NE                 | -0.054               | 39.06                     | 35.92                 |
| 31003              | Antelope, NE              | -0.092               | 27.22                     | 10.32                 |
| 31005              | Arthur, NE                | -0.082               | 30.66                     | 0.83                  |
| 31007              | Banner, NE                | -0.17                | 7.77                      | 0.41                  |
| 31009              | Blaine, NE                | 0.015                | 59.22                     | 9.08                  |
| 31011              | Boone, NE                 | -0.1                 | 24.64                     | 2.83                  |
| 31013              | Box Butte, NE             | -0.105               | 22.99                     | 35.86                 |
| 31015              | Boyd, NE                  | -0.103               | 23.78                     | 9.2                   |
| 31017              | Brown, NE                 | -0.125               | 17.19                     | 12.52                 |
| 31019              | Buffalo, NE               | -0.066               | 35.21                     | 26.56                 |
| 31021              | Burt, NE                  | -0.065               | 35.37                     | 25.41                 |
| 31023              | Butler, NE                | -0.081               | 30.95                     | 11.72                 |
| 31025              | Cass, NE                  | -0.083               | 30.25                     | 1.08                  |
| 31027              | Cedar, NE                 | -0.078               | 31.93                     | 1.21                  |
| 31029              | Chase, NE                 | -0.157               | 9.96                      | 15.51                 |
| 31031              | Cherry, NE                | -0.123               | 17.92                     | 22.61                 |
| 31033              | Cheyenne, NE              | -0.049               | 40.24                     | 12.1                  |
| 31035              | Clay, NE                  | -0.077               | 32.16                     | 16.46                 |
| 31037              | Colfax, NE                | 0.021                | 60.97                     | 51.88                 |
| 31039              | Cuming, NE                | -0.131               | 15.86                     | 19.36                 |
| 31041              | Custer, NE                | -0.112               | 21.08                     | 18.18                 |
| 31043              | Dakota, NE                | 0.03                 | 63.36                     | 86.15                 |
| 31045              | Dawes, NE                 | -0.045               | 41.52                     | 17.17                 |
| 31047              | Dawson, NE                | -0.08                | 31.3                      | 79.33                 |
| 31049              | Deuel, NE                 | -0.154               | 10.73                     | 16.5                  |
| 31051              | Dixon, NE                 | -0.054               | 39.03                     | 37.9                  |
| 31053              | Dodge, NE                 | -0.096               | 26.11                     | 56.91                 |
| 31055              | Douglas, NE               | -0.183               | 6.24                      | 46.69                 |
| 31057              | Dundy, NE                 | -0.108               | 22.09                     | 30.38                 |
| 31059              | Fillmore, NE              | -0.182               | 6.4                       | 6.18                  |
| 31061              | Franklin, NE              | -0.171               | 7.54                      | 7.68                  |
| 31063              | Frontier, NE              | -0.094               | 26.81                     | 9.94                  |
| 31065              | Furnas, NE                | -0.12                | 19.04                     | 18.25                 |
| 31067              | Gage, NE                  | -0.125               | 17.22                     | 11.05                 |
| 31069              | Garden, NE                | -0.146               | 12.54                     | 1.43                  |
| 31071              | Garfield, NE              | -0.169               | 7.96                      | 4.3                   |
| 31073              | Gosper, NE                | -0.149               | 11.88                     | 0.51                  |
| 31075              | Grant, NE                 | 0.04                 | 65.87                     | 13.28                 |
| 31077              | Greeley, NE               | -0.081               | 30.88                     | 4.11                  |
| 31079              | Hall, NE                  | -0.099               | 24.86                     | 67.01                 |
| 31081              | Hamilton, NE              | -0.137               | 14.39                     | 0.89                  |

| <b>County FIPS</b> | <b>County Description</b> | <b>DOS-SVI Index</b> | <b>DOS-SVI Percentile</b> | <b>SVI Percentile</b> |
|--------------------|---------------------------|----------------------|---------------------------|-----------------------|
| 31083              | Harlan, NE                | -0.062               | 36.45                     | 12.39                 |
| 31085              | Hayes, NE                 | -0.118               | 19.55                     | 4.36                  |
| 31087              | Hitchcock, NE             | -0.039               | 43.33                     | 19.43                 |
| 31089              | Holt, NE                  | -0.094               | 26.9                      | 9.81                  |
| 31091              | Hooker, NE                | -0.155               | 10.41                     | 14.68                 |
| 31093              | Howard, NE                | -0.099               | 24.96                     | 8.03                  |
| 31095              | Jefferson, NE             | -0.186               | 6.02                      | 21.85                 |
| 31097              | Johnson, NE               | 0.004                | 55.78                     | 57.77                 |
| 31099              | Kearney, NE               | -0.037               | 44.16                     | 9.39                  |
| 31101              | Keith, NE                 | -0.063               | 35.78                     | 22.68                 |
| 31103              | Keya Paha, NE             | -0.121               | 18.62                     | 0.1                   |
| 31105              | Kimball, NE               | -0.069               | 34.38                     | 56.11                 |
| 31107              | Knox, NE                  | 0.003                | 55.68                     | 32.77                 |
| 31109              | Lancaster, NE             | -0.153               | 10.89                     | 30.25                 |
| 31111              | Lincoln, NE               | -0.073               | 33.08                     | 36.75                 |
| 31113              | Logan, NE                 | 0.085                | 76.66                     | 10.73                 |
| 31115              | Loup, NE                  | -0.184               | 6.21                      | 0.45                  |
| 31117              | McPherson, NE             | 0.098                | 78.99                     | 8.38                  |
| 31119              | Madison, NE               | -0.096               | 26.04                     | 51.05                 |
| 31121              | Merrick, NE               | -0.034               | 44.89                     | 19.75                 |
| 31123              | Morrill, NE               | -0.085               | 29.58                     | 42.2                  |
| 31125              | Nance, NE                 | -0.125               | 17.32                     | 8.25                  |
| 31127              | Nemaha, NE                | -0.107               | 22.32                     | 16.59                 |
| 31129              | Nuckolls, NE              | -0.156               | 10.38                     | 17.36                 |
| 31131              | Otoe, NE                  | -0.109               | 21.71                     | 22.87                 |
| 31133              | Pawnee, NE                | -0.022               | 48.42                     | 23.18                 |
| 31135              | Perkins, NE               | -0.127               | 16.81                     | 5.38                  |
| 31137              | Phelps, NE                | -0.122               | 18.15                     | 12.26                 |
| 31139              | Pierce, NE                | -0.089               | 28.43                     | 2.29                  |
| 31141              | Platte, NE                | -0.084               | 30.09                     | 29.94                 |
| 31143              | Polk, NE                  | -0.019               | 49.63                     | 19.08                 |
| 31145              | Red Willow, NE            | -0.117               | 19.87                     | 23.73                 |
| 31147              | Richardson, NE            | -0.163               | 8.95                      | 10.25                 |
| 31149              | Rock, NE                  | -0.206               | 4.3                       | 0.92                  |
| 31151              | Saline, NE                | -0.041               | 42.95                     | 59.78                 |
| 31153              | Sarpy, NE                 | -0.133               | 15.31                     | 9.71                  |
| 31155              | Saunders, NE              | -0.105               | 22.8                      | 4.24                  |
| 31157              | Scotts Bluff, NE          | -0.122               | 18.37                     | 56.75                 |
| 31159              | Seward, NE                | -0.094               | 26.84                     | 4.68                  |
| 31161              | Sheridan, NE              | -0.008               | 52.31                     | 59.68                 |
| 31163              | Sherman, NE               | -0.102               | 24.2                      | 7.39                  |
| 31165              | Sioux, NE                 | -0.099               | 24.99                     | 1.78                  |
| 31167              | Stanton, NE               | -0.107               | 22.22                     | 5.7                   |
| 31169              | Thayer, NE                | -0.138               | 14.23                     | 5.8                   |
| 31171              | Thomas, NE                | -0.18                | 6.62                      | 0.35                  |
| 31173              | Thurston, NE              | 0.499                | 99.33                     | 88.66                 |
| 31175              | Valley, NE                | -0.133               | 15.12                     | 14.84                 |
| 31177              | Washington, NE            | -0.116               | 20.15                     | 3.79                  |
| 31179              | Wayne, NE                 | -0.057               | 38.24                     | 8.47                  |
| 31181              | Webster, NE               | -0.108               | 21.97                     | 10.92                 |
| 31183              | Wheeler, NE               | -0.11                | 21.49                     | 0.48                  |
| 31185              | York, NE                  | -0.131               | 15.92                     | 18.28                 |
| 32001              | Churchill, NV             | -0.004               | 53.55                     | 60.48                 |
| 32003              | Clark, NV                 | -0.152               | 11.08                     | 74.04                 |
| 32005              | Douglas, NV               | -0.206               | 4.39                      | 17.93                 |

| <b>County FIPS</b> | <b>County Description</b> | <b>DOS-SVI Index</b> | <b>DOS-SVI Percentile</b> | <b>SVI Percentile</b> |
|--------------------|---------------------------|----------------------|---------------------------|-----------------------|
| 32007              | Elko, NV                  | 0.055                | 69.53                     | 51.78                 |
| 32009              | Esmeralda, NV             | 0.045                | 67.24                     | 63.95                 |
| 32011              | Eureka, NV                | 0.09                 | 77.52                     | 6.75                  |
| 32013              | Humboldt, NV              | 0.16                 | 88.67                     | 58.69                 |
| 32015              | Lander, NV                | 0.273                | 96.91                     | 82.61                 |
| 32017              | Lincoln, NV               | 0.017                | 59.82                     | 42.13                 |
| 32019              | Lyon, NV                  | 0.021                | 61.06                     | 57.83                 |
| 32021              | Mineral, NV               | 0.096                | 78.64                     | 88.15                 |
| 32023              | Nye, NV                   | 0.067                | 72.84                     | 73.09                 |
| 32027              | Pershing, NV              | 0.38                 | 98.66                     | 90.38                 |
| 32029              | Storey, NV                | -0.237               | 2.32                      | 7.17                  |
| 32031              | Washoe, NV                | -0.096               | 25.98                     | 52.71                 |
| 32033              | White Pine, NV            | 0.086                | 76.73                     | 37.42                 |
| 32510              | Carson City, NV           | -0.085               | 29.83                     | 84.43                 |
| 33001              | Belknap, NH               | -0.115               | 20.41                     | 8.41                  |
| 33003              | Carroll, NH               | -0.178               | 6.78                      | 5.83                  |
| 33005              | Cheshire, NH              | -0.138               | 14.33                     | 14.17                 |
| 33007              | Coos, NH                  | -0.057               | 37.89                     | 52.9                  |
| 33009              | Grafton, NH               | -0.137               | 14.42                     | 18.82                 |
| 33011              | Hillsborough, NH          | -0.2                 | 4.97                      | 19.11                 |
| 33013              | Merrimack, NH             | -0.15                | 11.72                     | 14.55                 |
| 33015              | Rockingham, NH            | -0.21                | 4.01                      | 1.11                  |
| 33017              | Strafford, NH             | -0.073               | 33.14                     | 17.48                 |
| 33019              | Sullivan, NH              | -0.149               | 12.03                     | 15.13                 |
| 34001              | Atlantic, NJ              | -0.157               | 10.06                     | 79.11                 |
| 34003              | Bergen, NJ                | -0.289               | 0.73                      | 23.95                 |
| 34005              | Burlington, NJ            | -0.194               | 5.32                      | 20.54                 |
| 34007              | Camden, NJ                | -0.194               | 5.38                      | 61.18                 |
| 34009              | Cape May, NJ              | -0.162               | 8.98                      | 33.98                 |
| 34011              | Cumberland, NJ            | -0.063               | 35.82                     | 95.92                 |
| 34013              | Essex, NJ                 | -0.133               | 15.09                     | 84.04                 |
| 34015              | Gloucester, NJ            | -0.134               | 14.99                     | 16.75                 |
| 34017              | Hudson, NJ                | -0.112               | 21.14                     | 64.24                 |
| 34019              | Hunterdon, NJ             | -0.22                | 3.57                      | 2.64                  |
| 34021              | Mercer, NJ                | -0.233               | 2.67                      | 55.8                  |
| 34023              | Middlesex, NJ             | -0.186               | 5.95                      | 46.59                 |
| 34025              | Monmouth, NJ              | -0.227               | 2.96                      | 16.05                 |
| 34027              | Morris, NJ                | -0.274               | 1.15                      | 12.01                 |
| 34029              | Ocean, NJ                 | -0.075               | 32.66                     | 33.54                 |
| 34031              | Passaic, NJ               | -0.062               | 36.17                     | 77.64                 |
| 34033              | Salem, NJ                 | -0.125               | 17.29                     | 59.01                 |
| 34035              | Somerset, NJ              | -0.268               | 1.34                      | 10                    |
| 34037              | Sussex, NJ                | -0.158               | 9.77                      | 1.91                  |
| 34039              | Union, NJ                 | -0.225               | 3.12                      | 62.32                 |
| 34041              | Warren, NJ                | -0.169               | 7.93                      | 21.78                 |
| 35001              | Bernalillo, NM            | -0.18                | 6.59                      | 68.28                 |
| 35003              | Catron, NM                | -0.175               | 7.29                      | 33.57                 |
| 35005              | Chaves, NM                | -0.034               | 45.15                     | 95.51                 |
| 35006              | Cibola, NM                | 0.371                | 98.63                     | 99.84                 |
| 35007              | Colfax, NM                | -0.035               | 44.73                     | 96.27                 |
| 35009              | Curry, NM                 | -0.015               | 50.62                     | 87.74                 |
| 35011              | De Baca, NM               | 0.061                | 71.22                     | 69.39                 |
| 35013              | Dona Ana, NM              | 0.001                | 55.05                     | 98.41                 |
| 35015              | Eddy, NM                  | 0.024                | 61.86                     | 70.32                 |
| 35017              | Grant, NM                 | 0.018                | 60.17                     | 92.96                 |

| <b>County FIPS</b> | <b>County Description</b> | <b>DOS-SVI Index</b> | <b>DOS-SVI Percentile</b> | <b>SVI Percentile</b> |
|--------------------|---------------------------|----------------------|---------------------------|-----------------------|
| 35019              | Guadalupe, NM             | -0.005               | 53.17                     | 95.29                 |
| 35021              | Harding, NM               | -0.149               | 11.97                     | 36.15                 |
| 35023              | Hidalgo, NM               | 0.085                | 76.41                     | 96.31                 |
| 35025              | Lea, NM                   | 0.106                | 80.61                     | 92.17                 |
| 35027              | Lincoln, NM               | -0.114               | 20.66                     | 47.96                 |
| 35028              | Los Alamos, NM            | -0.247               | 1.97                      | 2.48                  |
| 35029              | Luna, NM                  | 0.07                 | 73.54                     | 99.9                  |
| 35031              | McKinley, NM              | 0.619                | 99.59                     | 98.89                 |
| 35033              | Mora, NM                  | 0.065                | 72.24                     | 79.59                 |
| 35035              | Otero, NM                 | 0.074                | 74.56                     | 91.4                  |
| 35037              | Quay, NM                  | -0.05                | 39.95                     | 80.96                 |
| 35041              | Roosevelt, NM             | 0.128                | 84.14                     | 94.3                  |
| 35043              | Sandoval, NM              | -0.04                | 43.3                      | 48.18                 |
| 35045              | San Juan, NM              | 0.258                | 96.5                      | 91.94                 |
| 35047              | San Miguel, NM            | -0.039               | 43.43                     | 98.63                 |
| 35049              | Santa Fe, NM              | -0.235               | 2.55                      | 52.55                 |
| 35051              | Sierra, NM                | -0.096               | 26.27                     | 91.46                 |
| 35053              | Socorro, NM               | 0.128                | 84.21                     | 97.45                 |
| 35055              | Taos, NM                  | -0.098               | 25.02                     | 85.86                 |
| 35057              | Torrance, NM              | 0.16                 | 88.83                     | 74.9                  |
| 35059              | Union, NM                 | -0.059               | 37.5                      | 67.93                 |
| 35061              | Valencia, NM              | 0.064                | 72.17                     | 90.41                 |
| 36001              | Albany, NY                | -0.155               | 10.54                     | 30.41                 |
| 36003              | Allegany, NY              | 0.091                | 77.71                     | 58.18                 |
| 36005              | Bronx, NY                 | 0.11                 | 81.34                     | 99.27                 |
| 36007              | Broome, NY                | -0.05                | 40.15                     | 61.66                 |
| 36009              | Cattaraugus, NY           | 0.066                | 72.59                     | 72.83                 |
| 36011              | Cayuga, NY                | -0.06                | 37.22                     | 50.25                 |
| 36013              | Chautauqua, NY            | -0.012               | 51.51                     | 72.48                 |
| 36015              | Chemung, NY               | -0.061               | 36.48                     | 48.5                  |
| 36017              | Chenango, NY              | 0.057                | 69.88                     | 56.46                 |
| 36019              | Clinton, NY               | -0.006               | 52.85                     | 53.12                 |
| 36021              | Columbia, NY              | -0.136               | 14.49                     | 38.54                 |
| 36023              | Cortland, NY              | -0.026               | 47.44                     | 34.52                 |
| 36025              | Delaware, NY              | -0.006               | 52.79                     | 63.31                 |
| 36027              | Dutchess, NY              | -0.055               | 38.52                     | 42.07                 |
| 36029              | Erie, NY                  | -0.12                | 18.78                     | 41.4                  |
| 36031              | Essex, NY                 | -0.064               | 35.59                     | 38.69                 |
| 36033              | Franklin, NY              | 0.055                | 69.56                     | 70.73                 |
| 36035              | Fulton, NY                | -0.057               | 38.01                     | 50.1                  |
| 36037              | Genesee, NY               | -0.088               | 28.78                     | 18.79                 |
| 36039              | Greene, NY                | -0.028               | 46.8                      | 41.59                 |
| 36041              | Hamilton, NY              | -0.094               | 26.68                     | 38.98                 |
| 36043              | Herkimer, NY              | 0.007                | 56.7                      | 53.22                 |
| 36045              | Jefferson, NY             | 0.06                 | 70.77                     | 64.84                 |
| 36047              | Kings, NY                 | 0.27                 | 96.82                     | 81.53                 |
| 36049              | Lewis, NY                 | 0.023                | 61.67                     | 29.11                 |
| 36051              | Livingston, NY            | -0.007               | 52.56                     | 34.24                 |
| 36053              | Madison, NY               | -0.035               | 44.83                     | 16.66                 |
| 36055              | Monroe, NY                | -0.157               | 10                        | 52.04                 |
| 36057              | Montgomery, NY            | 0.017                | 59.85                     | 83.06                 |
| 36059              | Nassau, NY                | -0.225               | 3.18                      | 24.3                  |
| 36061              | New York, NY              | -0.147               | 12.29                     | 55.1                  |
| 36063              | Niagara, NY               | -0.113               | 20.89                     | 33.18                 |
| 36065              | Oneida, NY                | -0.067               | 34.67                     | 69.46                 |

| <b>County FIPS</b> | <b>County Description</b> | <b>DOS-SVI Index</b> | <b>DOS-SVI Percentile</b> | <b>SVI Percentile</b> |
|--------------------|---------------------------|----------------------|---------------------------|-----------------------|
| 36067              | Onondaga, NY              | -0.129               | 16.33                     | 52.07                 |
| 36069              | Ontario, NY               | -0.135               | 14.96                     | 23.15                 |
| 36071              | Orange, NY                | -0.013               | 51                        | 55.38                 |
| 36073              | Orleans, NY               | 0.012                | 58.45                     | 64.3                  |
| 36075              | Oswego, NY                | 0.064                | 72.21                     | 64.97                 |
| 36077              | Otsego, NY                | 0.019                | 60.4                      | 42.36                 |
| 36079              | Putnam, NY                | -0.16                | 9.52                      | 8.12                  |
| 36081              | Queens, NY                | 0.028                | 62.81                     | 62.01                 |
| 36083              | Rensselaer, NY            | -0.12                | 19.1                      | 34.3                  |
| 36085              | Richmond, NY              | -0.033               | 45.49                     | 47.64                 |
| 36087              | Rockland, NY              | 0.04                 | 65.9                      | 60.38                 |
| 36089              | St. Lawrence, NY          | 0.07                 | 73.61                     | 74.75                 |
| 36091              | Saratoga, NY              | -0.167               | 8.37                      | 4.75                  |
| 36093              | Schenectady, NY           | -0.105               | 22.7                      | 39.43                 |
| 36095              | Schoharie, NY             | -0.085               | 29.64                     | 40.13                 |
| 36097              | Schuyler, NY              | 0.018                | 60.27                     | 36.91                 |
| 36099              | Seneca, NY                | -0.006               | 52.98                     | 44.9                  |
| 36101              | Steuben, NY               | -0.007               | 52.53                     | 46.91                 |
| 36103              | Suffolk, NY               | -0.153               | 10.86                     | 21.46                 |
| 36105              | Sullivan, NY              | 0.008                | 56.83                     | 79.39                 |
| 36107              | Tioga, NY                 | -0.034               | 45.02                     | 19.94                 |
| 36109              | Tompkins, NY              | -0.034               | 45.24                     | 34.62                 |
| 36111              | Ulster, NY                | -0.096               | 26.17                     | 47.04                 |
| 36113              | Warren, NY                | -0.123               | 18.11                     | 17.42                 |
| 36115              | Washington, NY            | -0.023               | 48.11                     | 40                    |
| 36117              | Wayne, NY                 | -0.051               | 39.83                     | 34.14                 |
| 36119              | Westchester, NY           | -0.243               | 2.17                      | 55.16                 |
| 36121              | Wyoming, NY               | -0.028               | 46.7                      | 31.21                 |
| 36123              | Yates, NY                 | 0.097                | 78.96                     | 43.92                 |
| 37001              | Alamance, NC              | -0.082               | 30.47                     | 78.38                 |
| 37003              | Alexander, NC             | 0.138                | 85.8                      | 63.41                 |
| 37005              | Alleghany, NC             | -0.061               | 36.64                     | 62.68                 |
| 37007              | Anson, NC                 | 0.157                | 88.06                     | 94.43                 |
| 37009              | Ashe, NC                  | -0.057               | 38.11                     | 49.94                 |
| 37011              | Avery, NC                 | 0.029                | 63.01                     | 64.46                 |
| 37013              | Beaufort, NC              | -0.003               | 53.84                     | 71.56                 |
| 37015              | Bertie, NC                | 0.166                | 89.65                     | 93.85                 |
| 37017              | Bladen, NC                | 0.12                 | 83.06                     | 94.46                 |
| 37019              | Brunswick, NC             | -0.122               | 18.27                     | 35.83                 |
| 37021              | Buncombe, NC              | -0.053               | 39.38                     | 37.99                 |
| 37023              | Burke, NC                 | 0.119                | 82.9                      | 84.87                 |
| 37025              | Cabarrus, NC              | -0.003               | 53.77                     | 41.75                 |
| 37027              | Caldwell, NC              | 0.032                | 63.83                     | 65.1                  |
| 37029              | Camden, NC                | -0.027               | 46.99                     | 30.7                  |
| 37031              | Carteret, NC              | -0.144               | 12.93                     | 42.55                 |
| 37033              | Caswell, NC               | 0.105                | 80.36                     | 83.6                  |
| 37035              | Catawba, NC               | 0                    | 54.66                     | 64.81                 |
| 37037              | Chatham, NC               | -0.151               | 11.4                      | 38.09                 |
| 37039              | Cherokee, NC              | 0.012                | 58.61                     | 48.69                 |
| 37041              | Chowan, NC                | 0.031                | 63.64                     | 81.18                 |
| 37043              | Clay, NC                  | -0.082               | 30.44                     | 21.91                 |
| 37045              | Cleveland, NC             | 0.076                | 74.98                     | 83.5                  |
| 37047              | Columbus, NC              | 0.109                | 81.22                     | 94.81                 |
| 37049              | Craven, NC                | -0.009               | 52.02                     | 80.99                 |
| 37051              | Cumberland, NC            | -0.047               | 40.94                     | 86.4                  |

| <b>County FIPS</b> | <b>County Description</b> | <b>DOS-SVI Index</b> | <b>DOS-SVI Percentile</b> | <b>SVI Percentile</b> |
|--------------------|---------------------------|----------------------|---------------------------|-----------------------|
| 37053              | Currituck, NC             | -0.016               | 50.43                     | 11.94                 |
| 37055              | Dare, NC                  | -0.114               | 20.6                      | 14.49                 |
| 37057              | Davidson, NC              | 0.029                | 62.88                     | 68.41                 |
| 37059              | Davie, NC                 | -0.019               | 49.44                     | 44.11                 |
| 37061              | Duplin, NC                | 0.193                | 92.04                     | 97.9                  |
| 37063              | Durham, NC                | -0.249               | 1.94                      | 61.97                 |
| 37065              | Edgecombe, NC             | 0.054                | 69.34                     | 97.26                 |
| 37067              | Forsyth, NC               | -0.155               | 10.51                     | 68.34                 |
| 37069              | Franklin, NC              | 0.051                | 68.7                      | 63.76                 |
| 37071              | Gaston, NC                | 0.001                | 54.76                     | 67.2                  |
| 37073              | Gates, NC                 | 0.068                | 72.88                     | 35.67                 |
| 37075              | Graham, NC                | 0.101                | 79.72                     | 63.38                 |
| 37077              | Granville, NC             | -0.041               | 42.73                     | 65.61                 |
| 37079              | Greene, NC                | 0.204                | 93.06                     | 99.24                 |
| 37081              | Guilford, NC              | -0.179               | 6.72                      | 63.69                 |
| 37083              | Halifax, NC               | 0.022                | 61.48                     | 96.46                 |
| 37085              | Harnett, NC               | 0.117                | 82.49                     | 78.69                 |
| 37087              | Haywood, NC               | -0.082               | 30.69                     | 28.09                 |
| 37089              | Henderson, NC             | -0.111               | 21.27                     | 32.1                  |
| 37091              | Hertford, NC              | 0.095                | 78.38                     | 98.73                 |
| 37093              | Hoke, NC                  | 0.108                | 80.96                     | 89.24                 |
| 37095              | Hyde, NC                  | 0.146                | 86.69                     | 86.27                 |
| 37097              | Iredell, NC               | -0.041               | 42.82                     | 37.45                 |
| 37099              | Jackson, NC               | 0.001                | 54.85                     | 62.36                 |
| 37101              | Johnston, NC              | 0.012                | 58.39                     | 53.95                 |
| 37103              | Jones, NC                 | 0.123                | 83.73                     | 87.61                 |
| 37105              | Lee, NC                   | -0.004               | 53.49                     | 84.81                 |
| 37107              | Lenoir, NC                | 0.097                | 78.73                     | 99.33                 |
| 37109              | Lincoln, NC               | 0.013                | 58.68                     | 35.64                 |
| 37111              | McDowell, NC              | 0.115                | 82.17                     | 78.95                 |
| 37113              | Macon, NC                 | -0.082               | 30.59                     | 35.48                 |
| 37115              | Madison, NC               | 0.063                | 71.73                     | 45.86                 |
| 37117              | Martin, NC                | -0.026               | 47.37                     | 75.41                 |
| 37119              | Mecklenburg, NC           | -0.268               | 1.3                       | 44.08                 |
| 37121              | Mitchell, NC              | -0.042               | 42.66                     | 42.23                 |
| 37123              | Montgomery, NC            | 0.105                | 80.48                     | 87.13                 |
| 37125              | Moore, NC                 | -0.095               | 26.52                     | 36.21                 |
| 37127              | Nash, NC                  | 0.004                | 55.81                     | 82.87                 |
| 37129              | New Hanover, NC           | -0.193               | 5.48                      | 37.71                 |
| 37131              | Northampton, NC           | -0.055               | 38.55                     | 90.22                 |
| 37133              | Onslow, NC                | 0.092                | 77.91                     | 74.65                 |
| 37135              | Orange, NC                | -0.157               | 10.22                     | 29.59                 |
| 37137              | Pamlico, NC               | 0.038                | 65.52                     | 71.62                 |
| 37139              | Pasquotank, NC            | -0.005               | 53.1                      | 77.48                 |
| 37141              | Pender, NC                | 0.073                | 74.28                     | 54.78                 |
| 37143              | Perquimans, NC            | -0.038               | 43.78                     | 50.48                 |
| 37145              | Person, NC                | 0.076                | 75.01                     | 77.32                 |
| 37147              | Pitt, NC                  | -0.046               | 41.45                     | 82.42                 |
| 37149              | Polk, NC                  | -0.09                | 28.05                     | 38.25                 |
| 37151              | Randolph, NC              | 0.026                | 62.37                     | 69.65                 |
| 37153              | Richmond, NC              | 0.109                | 81.03                     | 97.96                 |
| 37155              | Robeson, NC               | 0.208                | 93.47                     | 99.11                 |
| 37157              | Rockingham, NC            | 0.006                | 56.38                     | 78.57                 |
| 37159              | Rowan, NC                 | 0.016                | 59.5                      | 81.43                 |
| 37161              | Rutherford, NC            | 0.058                | 70.26                     | 75.51                 |

| <b>County FIPS</b> | <b>County Description</b> | <b>DOS-SVI Index</b> | <b>DOS-SVI Percentile</b> | <b>SVI Percentile</b> |
|--------------------|---------------------------|----------------------|---------------------------|-----------------------|
| 37163              | Sampson, NC               | 0.154                | 87.78                     | 97.23                 |
| 37165              | Scotland, NC              | 0.221                | 94.62                     | 99.36                 |
| 37167              | Stanly, NC                | 0.045                | 67.3                      | 63.25                 |
| 37169              | Stokes, NC                | 0.012                | 58.33                     | 30.67                 |
| 37171              | Surry, NC                 | 0.077                | 75.14                     | 72.58                 |
| 37173              | Swain, NC                 | 0.123                | 83.83                     | 77.74                 |
| 37175              | Transylvania, NC          | -0.091               | 27.92                     | 39.75                 |
| 37177              | Tyrrell, NC               | 0.127                | 84.05                     | 87.64                 |
| 37179              | Union, NC                 | -0.012               | 51.32                     | 18.73                 |
| 37181              | Vance, NC                 | 0.099                | 79.24                     | 97.87                 |
| 37183              | Wake, NC                  | -0.2                 | 4.9                       | 27.74                 |
| 37185              | Warren, NC                | 0.042                | 66.6                      | 89.43                 |
| 37187              | Washington, NC            | -0.03                | 46.32                     | 87.87                 |
| 37189              | Watauga, NC               | -0.032               | 45.75                     | 41.21                 |
| 37191              | Wayne, NC                 | 0.029                | 63.1                      | 95.03                 |
| 37193              | Wilkes, NC                | 0.057                | 70.07                     | 69.24                 |
| 37195              | Wilson, NC                | 0.024                | 61.89                     | 93.6                  |
| 37197              | Yadkin, NC                | 0.059                | 70.49                     | 64.04                 |
| 37199              | Yancey, NC                | 0.004                | 55.87                     | 57.36                 |
| 38001              | Adams, ND                 | -0.161               | 9.27                      | 2.99                  |
| 38003              | Barnes, ND                | -0.152               | 11.02                     | 12.45                 |
| 38005              | Benson, ND                | 0.329                | 98.19                     | 84.33                 |
| 38007              | Billings, ND              | -0.079               | 31.52                     | 3.12                  |
| 38009              | Bottineau, ND             | -0.108               | 22.16                     | 6.91                  |
| 38011              | Bowman, ND                | -0.025               | 47.69                     | 17.55                 |
| 38013              | Burke, ND                 | 0.059                | 70.65                     | 0.7                   |
| 38015              | Burleigh, ND              | -0.176               | 6.97                      | 17.39                 |
| 38017              | Cass, ND                  | -0.309               | 0.54                      | 14.27                 |
| 38019              | Cavalier, ND              | -0.184               | 6.18                      | 1.72                  |
| 38021              | Dickey, ND                | -0.047               | 41.01                     | 11.59                 |
| 38023              | Divide, ND                | -0.28                | 1.02                      | 3.34                  |
| 38025              | Dunn, ND                  | 0.024                | 61.99                     | 22.26                 |
| 38027              | Eddy, ND                  | -0.236               | 2.45                      | 29.04                 |
| 38029              | Emmons, ND                | -0.177               | 6.94                      | 9.55                  |
| 38031              | Foster, ND                | -0.12                | 19.07                     | 1.75                  |
| 38033              | Golden Valley, ND         | -0.074               | 32.79                     | 9.3                   |
| 38035              | Grand Forks, ND           | -0.21                | 3.98                      | 30.29                 |
| 38037              | Grant, ND                 | -0.082               | 30.56                     | 7.1                   |
| 38039              | Griggs, ND                | -0.279               | 1.05                      | 7.32                  |
| 38041              | Hettinger, ND             | -0.178               | 6.75                      | 5.61                  |
| 38043              | Kidder, ND                | -0.033               | 45.43                     | 2.9                   |
| 38045              | LaMoure, ND               | -0.154               | 10.66                     | 4.43                  |
| 38047              | Logan, ND                 | -0.122               | 18.34                     | 3.82                  |
| 38049              | McHenry, ND               | -0.124               | 17.8                      | 2.96                  |
| 38051              | McIntosh, ND              | -0.269               | 1.27                      | 10.61                 |
| 38053              | McKenzie, ND              | 0.122                | 83.6                      | 39.2                  |
| 38055              | McLean, ND                | -0.12                | 18.91                     | 8.34                  |
| 38057              | Mercer, ND                | -0.088               | 28.81                     | 10.16                 |
| 38059              | Morton, ND                | -0.092               | 27.6                      | 10.35                 |
| 38061              | Mountrail, ND             | 0.139                | 85.93                     | 37.58                 |
| 38063              | Nelson, ND                | -0.173               | 7.48                      | 3.5                   |
| 38065              | Oliver, ND                | -0.088               | 28.53                     | 21.08                 |
| 38067              | Pembina, ND               | -0.133               | 15.15                     | 4.17                  |
| 38069              | Pierce, ND                | -0.167               | 8.4                       | 19.14                 |
| 38071              | Ramsey, ND                | -0.15                | 11.75                     | 35.32                 |

| <b>County FIPS</b> | <b>County Description</b> | <b>DOS-SVI Index</b> | <b>DOS-SVI Percentile</b> | <b>SVI Percentile</b> |
|--------------------|---------------------------|----------------------|---------------------------|-----------------------|
| 38073              | Ransom, ND                | -0.233               | 2.74                      | 8.57                  |
| 38075              | Renville, ND              | -0.057               | 38.17                     | 2.8                   |
| 38077              | Richland, ND              | -0.146               | 12.45                     | 12.17                 |
| 38079              | Rolette, ND               | 0.176                | 90.58                     | 90.7                  |
| 38081              | Sargent, ND               | -0.156               | 10.31                     | 2.32                  |
| 38083              | Sheridan, ND              | -0.206               | 4.33                      | 7.42                  |
| 38085              | Sioux, ND                 | 0.546                | 99.39                     | 88.44                 |
| 38087              | Slope, ND                 | -0.162               | 9.04                      | 1.37                  |
| 38089              | Stark, ND                 | -0.084               | 29.93                     | 21.4                  |
| 38091              | Steele, ND                | -0.138               | 14.17                     | 0.19                  |
| 38093              | Stutsman, ND              | -0.111               | 21.39                     | 24.24                 |
| 38095              | Towner, ND                | -0.044               | 41.93                     | 19.46                 |
| 38097              | Traill, ND                | -0.133               | 15.38                     | 9.27                  |
| 38099              | Walsh, ND                 | -0.114               | 20.69                     | 36.82                 |
| 38101              | Ward, ND                  | -0.101               | 24.51                     | 16.78                 |
| 38103              | Wells, ND                 | -0.135               | 14.87                     | 6.11                  |
| 38105              | Williams, ND              | -0.164               | 8.79                      | 25.1                  |
| 39001              | Adams, OH                 | 0.156                | 88.03                     | 77.04                 |
| 39003              | Allen, OH                 | -0.071               | 33.81                     | 57.93                 |
| 39005              | Ashland, OH               | 0.003                | 55.56                     | 43.34                 |
| 39007              | Ashtabula, OH             | 0.041                | 66.22                     | 78.57                 |
| 39009              | Athens, OH                | 0.113                | 81.82                     | 73.25                 |
| 39011              | Auglaize, OH              | -0.086               | 29.35                     | 5.35                  |
| 39013              | Belmont, OH               | -0.066               | 35.12                     | 35.96                 |
| 39015              | Brown, OH                 | 0.041                | 66.16                     | 40.48                 |
| 39017              | Butler, OH                | -0.107               | 22.35                     | 36.18                 |
| 39019              | Carroll, OH               | -0.032               | 45.84                     | 15.38                 |
| 39021              | Champaign, OH             | -0.038               | 43.81                     | 29.78                 |
| 39023              | Clark, OH                 | -0.077               | 32.12                     | 72.71                 |
| 39025              | Clermont, OH              | -0.11                | 21.65                     | 10.29                 |
| 39027              | Clinton, OH               | -0.013               | 50.97                     | 44.24                 |
| 39029              | Columbiana, OH            | 0.011                | 58.13                     | 48.54                 |
| 39031              | Coshocton, OH             | 0.129                | 84.27                     | 62.07                 |
| 39033              | Crawford, OH              | -0.097               | 25.66                     | 31.91                 |
| 39035              | Cuyahoga, OH              | -0.198               | 5.09                      | 68.09                 |
| 39037              | Darke, OH                 | -0.04                | 43.23                     | 13.47                 |
| 39039              | Defiance, OH              | -0.09                | 28.18                     | 21.66                 |
| 39041              | Delaware, OH              | -0.145               | 12.61                     | 1.66                  |
| 39043              | Erie, OH                  | -0.192               | 5.51                      | 29.14                 |
| 39045              | Fairfield, OH             | -0.076               | 32.25                     | 23.54                 |
| 39047              | Fayette, OH               | -0.055               | 38.68                     | 50.16                 |
| 39049              | Franklin, OH              | -0.16                | 9.49                      | 51.24                 |
| 39051              | Fulton, OH                | -0.048               | 40.62                     | 17.77                 |
| 39053              | Gallia, OH                | 0.144                | 86.44                     | 66.4                  |
| 39055              | Geauga, OH                | -0.024               | 47.85                     | 9.01                  |
| 39057              | Greene, OH                | -0.154               | 10.63                     | 20.76                 |
| 39059              | Guernsey, OH              | 0.031                | 63.71                     | 67.07                 |
| 39061              | Hamilton, OH              | -0.164               | 8.82                      | 53.69                 |
| 39063              | Hancock, OH               | -0.102               | 24.29                     | 21.11                 |
| 39065              | Hardin, OH                | 0.085                | 76.57                     | 47.1                  |
| 39067              | Harrison, OH              | 0.055                | 69.44                     | 51.94                 |
| 39069              | Henry, OH                 | -0.124               | 17.64                     | 15.57                 |
| 39071              | Highland, OH              | 0.081                | 75.96                     | 68.98                 |
| 39073              | Hocking, OH               | 0.054                | 69.28                     | 46.85                 |
| 39075              | Holmes, OH                | 0.486                | 99.27                     | 43.6                  |



| <b>County FIPS</b> | <b>County Description</b> | <b>DOS-SVI Index</b> | <b>DOS-SVI Percentile</b> | <b>SVI Percentile</b> |
|--------------------|---------------------------|----------------------|---------------------------|-----------------------|
| 39077              | Huron, OH                 | -0.025               | 47.6                      | 43.25                 |
| 39079              | Jackson, OH               | 0.131                | 84.62                     | 77.26                 |
| 39081              | Jefferson, OH             | -0.067               | 34.92                     | 54.94                 |
| 39083              | Knox, OH                  | 0.009                | 57.24                     | 29.43                 |
| 39085              | Lake, OH                  | -0.222               | 3.34                      | 12.93                 |
| 39087              | Lawrence, OH              | 0.033                | 64.15                     | 55.83                 |
| 39089              | Licking, OH               | -0.056               | 38.43                     | 22.9                  |
| 39091              | Logan, OH                 | 0.005                | 56.06                     | 31.69                 |
| 39093              | Lorain, OH                | -0.144               | 12.83                     | 50.89                 |
| 39095              | Lucas, OH                 | -0.141               | 13.63                     | 68.76                 |
| 39097              | Madison, OH               | -0.018               | 49.83                     | 33.82                 |
| 39099              | Mahoning, OH              | -0.151               | 11.56                     | 58.89                 |
| 39101              | Marion, OH                | 0.027                | 62.53                     | 64.14                 |
| 39103              | Medina, OH                | -0.14                | 13.75                     | 1.02                  |
| 39105              | Meigs, OH                 | 0.159                | 88.47                     | 67.87                 |
| 39107              | Mercer, OH                | -0.043               | 42.47                     | 5.1                   |
| 39109              | Miami, OH                 | -0.106               | 22.51                     | 11.91                 |
| 39111              | Monroe, OH                | -0.012               | 51.48                     | 44.3                  |
| 39113              | Montgomery, OH            | -0.124               | 17.73                     | 67.26                 |
| 39115              | Morgan, OH                | 0.035                | 64.88                     | 56.59                 |
| 39117              | Morrow, OH                | 0.073                | 74.12                     | 19.2                  |
| 39119              | Muskingum, OH             | 0.003                | 55.49                     | 59.81                 |
| 39121              | Noble, OH                 | 0.064                | 72.05                     | 42.93                 |
| 39123              | Ottawa, OH                | -0.161               | 9.23                      | 15.41                 |
| 39125              | Paulding, OH              | 0.016                | 59.57                     | 28.85                 |
| 39127              | Perry, OH                 | 0.066                | 72.56                     | 55.45                 |
| 39129              | Pickaway, OH              | 0.006                | 56.48                     | 28.18                 |
| 39131              | Pike, OH                  | 0.166                | 89.62                     | 79.94                 |
| 39133              | Portage, OH               | -0.107               | 22.38                     | 24.55                 |
| 39135              | Preble, OH                | -0.032               | 45.72                     | 16.91                 |
| 39137              | Putnam, OH                | -0.059               | 37.47                     | 1.53                  |
| 39139              | Richland, OH              | -0.014               | 50.78                     | 61.69                 |
| 39141              | Ross, OH                  | 0.068                | 72.97                     | 72.55                 |
| 39143              | Sandusky, OH              | -0.108               | 22.06                     | 39.87                 |
| 39145              | Scioto, OH                | 0.085                | 76.6                      | 83.47                 |
| 39147              | Seneca, OH                | -0.084               | 29.96                     | 37.55                 |
| 39149              | Shelby, OH                | -0.044               | 42.06                     | 18.92                 |
| 39151              | Stark, OH                 | -0.123               | 18.05                     | 36.66                 |
| 39153              | Summit, OH                | -0.17                | 7.64                      | 33.34                 |
| 39155              | Trumbull, OH              | -0.114               | 20.63                     | 46.4                  |
| 39157              | Tuscarawas, OH            | -0.015               | 50.68                     | 34.43                 |
| 39159              | Union, OH                 | -0.036               | 44.44                     | 7.71                  |
| 39161              | Van Wert, OH              | -0.104               | 23.4                      | 16.97                 |
| 39163              | Vinton, OH                | 0.207                | 93.41                     | 72.29                 |
| 39165              | Warren, OH                | -0.131               | 15.98                     | 4.78                  |
| 39167              | Washington, OH            | -0.067               | 34.8                      | 34.97                 |
| 39169              | Wayne, OH                 | 0.064                | 71.98                     | 47.9                  |
| 39171              | Williams, OH              | -0.028               | 46.74                     | 26.91                 |
| 39173              | Wood, OH                  | -0.121               | 18.43                     | 16.62                 |
| 39175              | Wyandot, OH               | -0.102               | 24.1                      | 22.74                 |
| 40001              | Adair, OK                 | 0.219                | 94.46                     | 89.65                 |
| 40003              | Alfalfa, OK               | -0.007               | 52.63                     | 25.35                 |
| 40005              | Atoka, OK                 | 0.131                | 84.69                     | 80.76                 |
| 40007              | Beaver, OK                | 0.009                | 57.37                     | 45.54                 |
| 40009              | Beckham, OK               | 0.122                | 83.54                     | 71.18                 |

| <b>County FIPS</b> | <b>County Description</b> | <b>DOS-SVI Index</b> | <b>DOS-SVI Percentile</b> | <b>SVI Percentile</b> |
|--------------------|---------------------------|----------------------|---------------------------|-----------------------|
| 40011              | Blaine, OK                | 0.02                 | 60.65                     | 66.78                 |
| 40013              | Bryan, OK                 | 0.094                | 78.29                     | 81.27                 |
| 40015              | Caddo, OK                 | 0.108                | 80.93                     | 94.59                 |
| 40017              | Canadian, OK              | -0.027               | 46.96                     | 26.21                 |
| 40019              | Carter, OK                | 0.048                | 67.88                     | 79.14                 |
| 40021              | Cherokee, OK              | 0.118                | 82.68                     | 92.71                 |
| 40023              | Choctaw, OK               | 0.087                | 77.01                     | 96.02                 |
| 40025              | Cimarron, OK              | -0.079               | 31.55                     | 44.75                 |
| 40027              | Cleveland, OK             | -0.093               | 27.12                     | 34.36                 |
| 40029              | Coal, OK                  | 0.054                | 69.31                     | 82.55                 |
| 40031              | Comanche, OK              | 0.005                | 56.13                     | 83.54                 |
| 40033              | Cotton, OK                | 0.078                | 75.36                     | 67.42                 |
| 40035              | Craig, OK                 | -0.005               | 53.23                     | 85.38                 |
| 40037              | Creek, OK                 | 0.064                | 72.02                     | 49.01                 |
| 40039              | Custer, OK                | 0.043                | 66.7                      | 75.03                 |
| 40041              | Delaware, OK              | 0.059                | 70.68                     | 76.97                 |
| 40043              | Dewey, OK                 | -0.002               | 54.28                     | 22.48                 |
| 40045              | Ellis, OK                 | -0.041               | 42.98                     | 30.19                 |
| 40047              | Garfield, OK              | -0.067               | 34.77                     | 59.08                 |
| 40049              | Garvin, OK                | 0.017                | 59.98                     | 51.15                 |
| 40051              | Grady, OK                 | 0.015                | 59.25                     | 30.8                  |
| 40053              | Grant, OK                 | -0.117               | 19.93                     | 16.34                 |
| 40055              | Greer, OK                 | 0.023                | 61.73                     | 77.42                 |
| 40057              | Harmon, OK                | -0.03                | 46.29                     | 81.08                 |
| 40059              | Harper, OK                | -0.007               | 52.69                     | 31.85                 |
| 40061              | Haskell, OK               | 0.195                | 92.26                     | 87.36                 |
| 40063              | Hughes, OK                | 0.123                | 83.64                     | 81.15                 |
| 40065              | Jackson, OK               | -0.013               | 51.19                     | 82.26                 |
| 40067              | Jefferson, OK             | 0.058                | 70.2                      | 87.45                 |
| 40069              | Johnston, OK              | 0.114                | 82.01                     | 84.68                 |
| 40071              | Kay, OK                   | 0.02                 | 60.84                     | 84.2                  |
| 40073              | Kingfisher, OK            | -0.006               | 52.95                     | 38.06                 |
| 40075              | Kiowa, OK                 | -0.02                | 48.97                     | 65.45                 |
| 40077              | Latimer, OK               | 0.097                | 78.7                      | 89.36                 |
| 40079              | Le Flore, OK              | 0.053                | 69.15                     | 90.32                 |
| 40081              | Lincoln, OK               | 0.117                | 82.43                     | 47.87                 |
| 40083              | Logan, OK                 | 0.046                | 67.4                      | 29.84                 |
| 40085              | Love, OK                  | 0.056                | 69.69                     | 62.93                 |
| 40087              | McClain, OK               | -0.024               | 48.04                     | 16.24                 |
| 40089              | McCurtain, OK             | 0.174                | 90.45                     | 91.37                 |
| 40091              | McIntosh, OK              | 0.193                | 92.07                     | 78.28                 |
| 40093              | Major, OK                 | 0.006                | 56.41                     | 32.04                 |
| 40095              | Marshall, OK              | 0.054                | 69.37                     | 85.45                 |
| 40097              | Mayes, OK                 | 0.098                | 79.05                     | 75.19                 |
| 40099              | Murray, OK                | 0.016                | 59.73                     | 70.92                 |
| 40101              | Muskogee, OK              | 0.008                | 57.08                     | 93.38                 |
| 40103              | Noble, OK                 | 0.043                | 66.73                     | 33.85                 |
| 40105              | Nowata, OK                | 0.033                | 64.09                     | 58.95                 |
| 40107              | Okfuskee, OK              | 0.273                | 96.94                     | 92.87                 |
| 40109              | Oklahoma, OK              | -0.127               | 16.84                     | 68.18                 |
| 40111              | Okmulgee, OK              | 0.078                | 75.33                     | 86.59                 |
| 40113              | Osage, OK                 | 0.063                | 71.86                     | 62.39                 |
| 40115              | Ottawa, OK                | 0.069                | 73.42                     | 95.76                 |
| 40117              | Pawnee, OK                | 0.118                | 82.62                     | 54.24                 |
| 40119              | Payne, OK                 | 0.049                | 68.23                     | 51.31                 |

| <b>County FIPS</b> | <b>County Description</b> | <b>DOS-SVI Index</b> | <b>DOS-SVI Percentile</b> | <b>SVI Percentile</b> |
|--------------------|---------------------------|----------------------|---------------------------|-----------------------|
| 40121              | Pittsburg, OK             | 0.034                | 64.41                     | 82.64                 |
| 40123              | Pontotoc, OK              | -0.012               | 51.64                     | 65                    |
| 40125              | Pottawatomie, OK          | 0.062                | 71.41                     | 78.15                 |
| 40127              | Pushmataha, OK            | 0.134                | 85.2                      | 78.63                 |
| 40129              | Roger Mills, OK           | 0.032                | 63.93                     | 40.03                 |
| 40131              | Rogers, OK                | -0.029               | 46.48                     | 28.34                 |
| 40133              | Seminole, OK              | 0.128                | 84.24                     | 92.9                  |
| 40135              | Sequoyah, OK              | 0.176                | 90.54                     | 91.59                 |
| 40137              | Stephens, OK              | -0.046               | 41.26                     | 60.51                 |
| 40139              | Texas, OK                 | 0.053                | 69.09                     | 82.1                  |
| 40141              | Tillman, OK               | 0.001                | 54.98                     | 87.1                  |
| 40143              | Tulsa, OK                 | -0.142               | 13.4                      | 61.59                 |
| 40145              | Wagoner, OK               | 0.019                | 60.3                      | 42.45                 |
| 40147              | Washington, OK            | -0.101               | 24.45                     | 43.82                 |
| 40149              | Washita, OK               | 0.019                | 60.33                     | 40.45                 |
| 40151              | Woods, OK                 | -0.123               | 18.02                     | 31.4                  |
| 40153              | Woodward, OK              | 0.008                | 56.89                     | 57.45                 |
| 41001              | Baker, OR                 | 0.05                 | 68.39                     | 68.54                 |
| 41003              | Benton, OR                | -0.098               | 25.37                     | 34.9                  |
| 41005              | Clackamas, OR             | -0.14                | 13.85                     | 18.95                 |
| 41007              | Clatsop, OR               | -0.08                | 31.33                     | 51.85                 |
| 41009              | Columbia, OR              | -0.01                | 51.96                     | 40.25                 |
| 41011              | Coos, OR                  | 0.009                | 57.43                     | 74.3                  |
| 41013              | Crook, OR                 | 0.041                | 66.28                     | 57.29                 |
| 41015              | Curry, OR                 | -0.141               | 13.56                     | 48.79                 |
| 41017              | Deschutes, OR             | -0.107               | 22.48                     | 16.37                 |
| 41019              | Douglas, OR               | 0.029                | 63.13                     | 72.77                 |
| 41021              | Gilliam, OR               | -0.023               | 48.14                     | 50.92                 |
| 41023              | Grant, OR                 | 0.022                | 61.32                     | 54.65                 |
| 41025              | Harney, OR                | 0.121                | 83.25                     | 71.08                 |
| 41027              | Hood River, OR            | -0.012               | 51.45                     | 54.55                 |
| 41029              | Jackson, OR               | -0.038               | 43.74                     | 73.54                 |
| 41031              | Jefferson, OR             | 0.148                | 86.92                     | 91.18                 |
| 41033              | Josephine, OR             | 0.088                | 77.14                     | 65.57                 |
| 41035              | Klamath, OR               | 0.068                | 73.22                     | 86.88                 |
| 41037              | Lake, OR                  | 0.085                | 76.47                     | 76.08                 |
| 41039              | Lane, OR                  | -0.071               | 33.84                     | 64.9                  |
| 41041              | Lincoln, OR               | -0.085               | 29.61                     | 55.22                 |
| 41043              | Linn, OR                  | 0.015                | 59.15                     | 67.9                  |
| 41045              | Malheur, OR               | 0.201                | 92.87                     | 99.65                 |
| 41047              | Marion, OR                | 0                    | 54.54                     | 85.35                 |
| 41049              | Morrow, OR                | 0.279                | 97.17                     | 76.43                 |
| 41051              | Multnomah, OR             | -0.16                | 9.46                      | 46.75                 |
| 41053              | Polk, OR                  | -0.067               | 34.89                     | 57.77                 |
| 41055              | Sherman, OR               | -0.151               | 11.53                     | 13.5                  |
| 41057              | Tillamook, OR             | -0.031               | 46.07                     | 65.86                 |
| 41059              | Umatilla, OR              | 0.151                | 87.3                      | 96.88                 |
| 41061              | Union, OR                 | 0.032                | 63.87                     | 67.29                 |
| 41063              | Wallowa, OR               | -0.054               | 38.94                     | 50.32                 |
| 41065              | Wasco, OR                 | -0.017               | 50.08                     | 83.89                 |
| 41067              | Washington, OR            | -0.15                | 11.68                     | 31.94                 |
| 41069              | Wheeler, OR               | -0.082               | 30.37                     | 39.01                 |
| 41071              | Yamhill, OR               | 0.008                | 56.86                     | 66.08                 |
| 42001              | Adams, PA                 | -0.082               | 30.63                     | 21.18                 |
| 42003              | Allegheny, PA             | -0.167               | 8.53                      | 25.06                 |

| <b>County FIPS</b> | <b>County Description</b> | <b>DOS-SVI Index</b> | <b>DOS-SVI Percentile</b> | <b>SVI Percentile</b> |
|--------------------|---------------------------|----------------------|---------------------------|-----------------------|
| 42005              | Armstrong, PA             | -0.042               | 42.57                     | 24.75                 |
| 42007              | Beaver, PA                | -0.117               | 19.83                     | 24.81                 |
| 42009              | Bedford, PA               | -0.002               | 54.31                     | 27.29                 |
| 42011              | Berks, PA                 | -0.13                | 16.24                     | 61.62                 |
| 42013              | Blair, PA                 | -0.074               | 32.89                     | 39.81                 |
| 42015              | Bradford, PA              | 0.001                | 54.73                     | 34.71                 |
| 42017              | Bucks, PA                 | -0.221               | 3.44                      | 8.31                  |
| 42019              | Butler, PA                | -0.104               | 23.27                     | 7.9                   |
| 42021              | Cambria, PA               | -0.043               | 42.41                     | 48.92                 |
| 42023              | Cameron, PA               | -0.115               | 20.25                     | 30.06                 |
| 42025              | Carbon, PA                | -0.062               | 36.13                     | 30.48                 |
| 42027              | Centre, PA                | -0.044               | 41.99                     | 28.92                 |
| 42029              | Chester, PA               | -0.186               | 5.99                      | 14.36                 |
| 42031              | Clarion, PA               | -0.006               | 53.04                     | 47.71                 |
| 42033              | Clearfield, PA            | 0.017                | 59.95                     | 60.54                 |
| 42035              | Clinton, PA               | 0.025                | 62.3                      | 48.6                  |
| 42037              | Columbia, PA              | -0.084               | 30.18                     | 27.68                 |
| 42039              | Crawford, PA              | 0.029                | 62.97                     | 50.64                 |
| 42041              | Cumberland, PA            | -0.148               | 12.16                     | 16.15                 |
| 42043              | Dauphin, PA               | -0.149               | 11.91                     | 49.75                 |
| 42045              | Delaware, PA              | -0.157               | 10.16                     | 41.31                 |
| 42047              | Elk, PA                   | -0.106               | 22.6                      | 11.66                 |
| 42049              | Erie, PA                  | -0.059               | 37.31                     | 61.94                 |
| 42051              | Fayette, PA               | -0.002               | 54.19                     | 62.48                 |
| 42053              | Forest, PA                | 0.306                | 97.61                     | 71.15                 |
| 42055              | Franklin, PA              | -0.072               | 33.27                     | 33.73                 |
| 42057              | Fulton, PA                | -0.02                | 49.35                     | 22.01                 |
| 42059              | Greene, PA                | 0.039                | 65.68                     | 43.5                  |
| 42061              | Huntingdon, PA            | 0.03                 | 63.55                     | 49.08                 |
| 42063              | Indiana, PA               | 0.028                | 62.66                     | 54.84                 |
| 42065              | Jefferson, PA             | -0.044               | 42.02                     | 33.12                 |
| 42067              | Juniata, PA               | 0.019                | 60.43                     | 44.84                 |
| 42069              | Lackawanna, PA            | -0.097               | 25.53                     | 52.52                 |
| 42071              | Lancaster, PA             | -0.052               | 39.45                     | 45.73                 |
| 42073              | Lawrence, PA              | -0.083               | 30.31                     | 46.94                 |
| 42075              | Lebanon, PA               | -0.066               | 35.27                     | 53.28                 |
| 42077              | Lehigh, PA                | -0.157               | 10.03                     | 63.5                  |
| 42079              | Luzerne, PA               | -0.114               | 20.79                     | 60.89                 |
| 42081              | Lycoming, PA              | -0.061               | 36.8                      | 42.1                  |
| 42083              | McKean, PA                | -0.009               | 52.05                     | 54.62                 |
| 42085              | Mercer, PA                | -0.022               | 48.58                     | 54.2                  |
| 42087              | Mifflin, PA               | 0.009                | 57.15                     | 47.23                 |
| 42089              | Monroe, PA                | -0.088               | 28.59                     | 30.64                 |
| 42091              | Montgomery, PA            | -0.244               | 2.07                      | 16.53                 |
| 42093              | Montour, PA               | -0.062               | 36.23                     | 31.11                 |
| 42095              | Northampton, PA           | -0.171               | 7.58                      | 28.76                 |
| 42097              | Northumberland, PA        | -0.037               | 43.97                     | 50.06                 |
| 42099              | Perry, PA                 | -0.04                | 43.01                     | 10.89                 |
| 42101              | Philadelphia, PA          | 0.011                | 58.2                      | 92.04                 |
| 42103              | Pike, PA                  | -0.162               | 9.07                      | 12.87                 |
| 42105              | Potter, PA                | -0.007               | 52.72                     | 44.17                 |
| 42107              | Schuylkill, PA            | -0.062               | 36.33                     | 45.06                 |
| 42109              | Snyder, PA                | -0.012               | 51.29                     | 22.99                 |
| 42111              | Somerset, PA              | -0.014               | 50.81                     | 42.26                 |
| 42113              | Sullivan, PA              | -0.136               | 14.55                     | 35.76                 |

| <b>County FIPS</b> | <b>County Description</b> | <b>DOS-SVI Index</b> | <b>DOS-SVI Percentile</b> | <b>SVI Percentile</b> |
|--------------------|---------------------------|----------------------|---------------------------|-----------------------|
| 42115              | Susquehanna, PA           | -0.072               | 33.43                     | 20.64                 |
| 42117              | Tioga, PA                 | -0.018               | 49.73                     | 31.53                 |
| 42119              | Union, PA                 | 0.071                | 73.86                     | 36.05                 |
| 42121              | Venango, PA               | -0.031               | 45.94                     | 42.29                 |
| 42123              | Warren, PA                | -0.078               | 31.8                      | 21.34                 |
| 42125              | Washington, PA            | -0.102               | 23.94                     | 16.94                 |
| 42127              | Wayne, PA                 | -0.063               | 35.85                     | 26.31                 |
| 42129              | Westmoreland, PA          | -0.14                | 13.82                     | 13.79                 |
| 42131              | Wyoming, PA               | -0.064               | 35.72                     | 11.21                 |
| 42133              | York, PA                  | -0.104               | 23.5                      | 32.9                  |
| 44001              | Bristol, RI               | -0.195               | 5.22                      | 12.36                 |
| 44003              | Kent, RI                  | -0.213               | 3.82                      | 15.19                 |
| 44005              | Newport, RI               | -0.226               | 3.09                      | 17.9                  |
| 44007              | Providence, RI            | -0.187               | 5.79                      | 75.92                 |
| 44009              | Washington, RI            | -0.172               | 7.51                      | 8.89                  |
| 45001              | Abbeville, SC             | 0.093                | 78.1                      | 85.64                 |
| 45003              | Aiken, SC                 | -0.028               | 46.86                     | 66.66                 |
| 45005              | Allendale, SC             | 0.3                  | 97.45                     | 99.3                  |
| 45007              | Anderson, SC              | 0.023                | 61.7                      | 70.1                  |
| 45009              | Bamberg, SC               | 0.05                 | 68.32                     | 95.16                 |
| 45011              | Barnwell, SC              | 0.168                | 89.78                     | 99.04                 |
| 45013              | Beaufort, SC              | -0.258               | 1.47                      | 40.06                 |
| 45015              | Berkeley, SC              | -0.049               | 40.31                     | 51.46                 |
| 45017              | Calhoun, SC               | 0.061                | 71.25                     | 56.27                 |
| 45019              | Charleston, SC            | -0.19                | 5.6                       | 31.56                 |
| 45021              | Cherokee, SC              | 0.12                 | 83.16                     | 69.78                 |
| 45023              | Chester, SC               | 0.089                | 77.4                      | 73.63                 |
| 45025              | Chesterfield, SC          | 0.26                 | 96.53                     | 94.87                 |
| 45027              | Clarendon, SC             | 0.203                | 93                        | 97.93                 |
| 45029              | Colleton, SC              | 0.081                | 75.9                      | 80                    |
| 45031              | Darlington, SC            | 0.153                | 87.52                     | 92.68                 |
| 45033              | Dillon, SC                | 0.253                | 96.31                     | 96.82                 |
| 45035              | Dorchester, SC            | -0.066               | 34.99                     | 41.88                 |
| 45037              | Edgefield, SC             | 0.016                | 59.66                     | 84.84                 |
| 45039              | Fairfield, SC             | 0.03                 | 63.42                     | 74.84                 |
| 45041              | Florence, SC              | 0.034                | 64.63                     | 89.87                 |
| 45043              | Georgetown, SC            | -0.118               | 19.48                     | 67.71                 |
| 45045              | Greenville, SC            | -0.105               | 23.08                     | 50.38                 |
| 45047              | Greenwood, SC             | -0.022               | 48.62                     | 93.44                 |
| 45049              | Hampton, SC               | 0.133                | 84.91                     | 80.32                 |
| 45051              | Horry, SC                 | -0.231               | 2.87                      | 61.02                 |
| 45053              | Jasper, SC                | 0.024                | 62.02                     | 94.49                 |
| 45055              | Kershaw, SC               | -0.004               | 53.45                     | 49.59                 |
| 45057              | Lancaster, SC             | -0.051               | 39.73                     | 51.21                 |
| 45059              | Laurens, SC               | 0.138                | 85.74                     | 91.72                 |
| 45061              | Lee, SC                   | 0.214                | 93.95                     | 92.1                  |
| 45063              | Lexington, SC             | -0.023               | 48.2                      | 44.2                  |
| 45065              | McCormick, SC             | -0.036               | 44.28                     | 73.73                 |
| 45067              | Marion, SC                | 0.128                | 84.11                     | 92.93                 |
| 45069              | Marlboro, SC              | 0.244                | 95.86                     | 98.69                 |
| 45071              | Newberry, SC              | 0.043                | 66.86                     | 92.32                 |
| 45073              | Oconee, SC                | -0.014               | 50.94                     | 72.93                 |
| 45075              | Orangeburg, SC            | 0.104                | 80.29                     | 92.29                 |
| 45077              | Pickens, SC               | 0.012                | 58.42                     | 59.9                  |
| 45079              | Richland, SC              | -0.151               | 11.49                     | 63.09                 |

| <b>County FIPS</b> | <b>County Description</b> | <b>DOS-SVI Index</b> | <b>DOS-SVI Percentile</b> | <b>SVI Percentile</b> |
|--------------------|---------------------------|----------------------|---------------------------|-----------------------|
| 45081              | Saluda, SC                | -0.002               | 54.09                     | 79.49                 |
| 45083              | Spartanburg, SC           | -0.007               | 52.59                     | 76.18                 |
| 45085              | Sumter, SC                | 0.105                | 80.39                     | 97.32                 |
| 45087              | Union, SC                 | 0.052                | 68.77                     | 86.78                 |
| 45089              | Williamsburg, SC          | 0.19                 | 91.75                     | 97.04                 |
| 45091              | York, SC                  | -0.101               | 24.58                     | 36.62                 |
| 46003              | Aurora, SD                | -0.081               | 31.11                     | 27.26                 |
| 46005              | Beadle, SD                | -0.06                | 36.9                      | 65.06                 |
| 46007              | Bennett, SD               | 0.464                | 99.2                      | 79.27                 |
| 46009              | Bon Homme, SD             | -0.009               | 52.15                     | 23.82                 |
| 46011              | Brookings, SD             | -0.075               | 32.51                     | 15.61                 |
| 46013              | Brown, SD                 | -0.133               | 15.41                     | 32.87                 |
| 46015              | Brule, SD                 | -0.045               | 41.48                     | 57.13                 |
| 46017              | Buffalo, SD               | 0.594                | 99.49                     | 97.1                  |
| 46019              | Butte, SD                 | -0.003               | 53.65                     | 36.27                 |
| 46021              | Campbell, SD              | -0.094               | 26.65                     | 0.64                  |
| 46023              | Charles Mix, SD           | 0.116                | 82.3                      | 73.89                 |
| 46025              | Clark, SD                 | -0.019               | 49.6                      | 17.1                  |
| 46027              | Clay, SD                  | -0.046               | 41.42                     | 24.68                 |
| 46029              | Codington, SD             | -0.063               | 35.75                     | 24.49                 |
| 46031              | Corson, SD                | 0.596                | 99.55                     | 83.95                 |
| 46033              | Custer, SD                | -0.132               | 15.47                     | 22.8                  |
| 46035              | Davison, SD               | -0.124               | 17.48                     | 23.38                 |
| 46037              | Day, SD                   | -0.187               | 5.86                      | 18.5                  |
| 46039              | Deuel, SD                 | -0.101               | 24.39                     | 8.22                  |
| 46041              | Dewey, SD                 | 0.594                | 99.52                     | 88.31                 |
| 46043              | Douglas, SD               | -0.031               | 46                        | 15.03                 |
| 46045              | Edmunds, SD               | -0.04                | 43.11                     | 3.41                  |
| 46047              | Fall River, SD            | -0.116               | 20.02                     | 41.72                 |
| 46049              | Faulk, SD                 | -0.061               | 36.74                     | 7.77                  |
| 46051              | Grant, SD                 | -0.168               | 8.21                      | 5.51                  |
| 46053              | Gregory, SD               | -0.11                | 21.55                     | 28.47                 |
| 46055              | Haakon, SD                | -0.027               | 47.09                     | 36.24                 |
| 46057              | Hamlin, SD                | 0.053                | 69.12                     | 15.86                 |
| 46059              | Hand, SD                  | -0.2                 | 4.93                      | 3.09                  |
| 46061              | Hanson, SD                | 0.009                | 57.27                     | 0.13                  |
| 46063              | Harding, SD               | 0.025                | 62.24                     | 8.28                  |
| 46065              | Hughes, SD                | -0.017               | 50.05                     | 40.61                 |
| 46067              | Hutchinson, SD            | -0.034               | 45.11                     | 24.87                 |
| 46069              | Hyde, SD                  | -0.081               | 30.98                     | 9.43                  |
| 46071              | Jackson, SD               | 0.573                | 99.43                     | 96.66                 |
| 46073              | Jerauld, SD               | -0.17                | 7.83                      | 5.06                  |
| 46075              | Jones, SD                 | -0.151               | 11.33                     | 0.51                  |
| 46077              | Kingsbury, SD             | -0.161               | 9.2                       | 2.23                  |
| 46079              | Lake, SD                  | -0.047               | 41.1                      | 19.65                 |
| 46081              | Lawrence, SD              | -0.113               | 20.82                     | 26.18                 |
| 46083              | Lincoln, SD               | -0.145               | 12.77                     | 2.01                  |
| 46085              | Lyman, SD                 | 0.173                | 90.29                     | 71.37                 |
| 46087              | McCook, SD                | -0.008               | 52.28                     | 22.29                 |
| 46089              | McPherson, SD             | -0.072               | 33.46                     | 28.89                 |
| 46091              | Marshall, SD              | -0.065               | 35.34                     | 21.31                 |
| 46093              | Meade, SD                 | -0.029               | 46.42                     | 8.92                  |
| 46095              | Mellette, SD              | 0.507                | 99.36                     | 91.56                 |
| 46097              | Miner, SD                 | -0.003               | 53.68                     | 10.57                 |
| 46099              | Minnehaha, SD             | -0.158               | 9.81                      | 35.89                 |

| <b>County FIPS</b> | <b>County Description</b> | <b>DOS-SVI Index</b> | <b>DOS-SVI Percentile</b> | <b>SVI Percentile</b> |
|--------------------|---------------------------|----------------------|---------------------------|-----------------------|
| 46101              | Moody, SD                 | -0.056               | 38.4                      | 39.08                 |
| 46102              | Oglala Lakota, SD         | 1.588                | 99.9                      | 99.43                 |
| 46103              | Pennington, SD            | -0.089               | 28.4                      | 41.62                 |
| 46105              | Perkins, SD               | -0.055               | 38.65                     | 10.96                 |
| 46107              | Potter, SD                | -0.087               | 28.97                     | 5.16                  |
| 46109              | Roberts, SD               | -0.065               | 35.47                     | 71.78                 |
| 46111              | Sanborn, SD               | -0.121               | 18.4                      | 3.85                  |
| 46115              | Spink, SD                 | -0.115               | 20.18                     | 17.68                 |
| 46117              | Stanley, SD               | -0.097               | 25.63                     | 10.99                 |
| 46119              | Sully, SD                 | -0.161               | 9.36                      | 0.73                  |
| 46121              | Todd, SD                  | 0.699                | 99.68                     | 95.64                 |
| 46123              | Tripp, SD                 | -0.121               | 18.56                     | 34.11                 |
| 46125              | Turner, SD                | -0.127               | 16.71                     | 10.8                  |
| 46127              | Union, SD                 | -0.216               | 3.69                      | 2.74                  |
| 46129              | Walworth, SD              | 0.017                | 60.01                     | 39.39                 |
| 46135              | Yankton, SD               | -0.158               | 9.84                      | 31.59                 |
| 46137              | Ziebach, SD               | 0.745                | 99.71                     | 95.38                 |
| 47001              | Anderson, TN              | -0.066               | 35.15                     | 60.64                 |
| 47003              | Bedford, TN               | 0.072                | 74.02                     | 77.58                 |
| 47005              | Benton, TN                | 0.096                | 78.57                     | 70.29                 |
| 47007              | Bledsoe, TN               | 0.16                 | 88.76                     | 81.59                 |
| 47009              | Blount, TN                | -0.065               | 35.44                     | 24.52                 |
| 47011              | Bradley, TN               | 0.009                | 57.59                     | 69.14                 |
| 47013              | Campbell, TN              | 0.035                | 64.92                     | 73.38                 |
| 47015              | Cannon, TN                | 0.057                | 69.91                     | 37.04                 |
| 47017              | Carroll, TN               | 0.073                | 74.05                     | 74.43                 |
| 47019              | Carter, TN                | 0.015                | 59.41                     | 61.53                 |
| 47021              | Cheatham, TN              | -0.011               | 51.8                      | 23.69                 |
| 47023              | Chester, TN               | 0.081                | 75.93                     | 64.36                 |
| 47025              | Claiborne, TN             | 0.102                | 80.01                     | 71.02                 |
| 47027              | Clay, TN                  | 0.063                | 71.63                     | 59.39                 |
| 47029              | Cocke, TN                 | 0.083                | 76.03                     | 68.57                 |
| 47031              | Coffee, TN                | 0.038                | 65.58                     | 49.14                 |
| 47033              | Crockett, TN              | 0.068                | 73.03                     | 78.12                 |
| 47035              | Cumberland, TN            | -0.07                | 33.94                     | 53.73                 |
| 47037              | Davidson, TN              | -0.255               | 1.72                      | 53.63                 |
| 47039              | Decatur, TN               | 0.037                | 65.11                     | 50.86                 |
| 47041              | DeKalb, TN                | 0.057                | 70.04                     | 43.06                 |
| 47043              | Dickson, TN               | 0.052                | 68.83                     | 42.9                  |
| 47045              | Dyer, TN                  | -0.012               | 51.35                     | 75.96                 |
| 47047              | Fayette, TN               | -0.084               | 30.12                     | 25.54                 |
| 47049              | Fentress, TN              | 0.18                 | 90.89                     | 63.73                 |
| 47051              | Franklin, TN              | -0.027               | 47.05                     | 37.64                 |
| 47053              | Gibson, TN                | 0.008                | 56.77                     | 73.5                  |
| 47055              | Giles, TN                 | 0.019                | 60.55                     | 60.32                 |
| 47057              | Grainger, TN              | 0.158                | 88.38                     | 59.3                  |
| 47059              | Greene, TN                | 0.041                | 66.35                     | 54.46                 |
| 47061              | Grundy, TN                | 0.161                | 88.86                     | 86.85                 |
| 47063              | Hamblen, TN               | 0.029                | 62.94                     | 81.46                 |
| 47065              | Hamilton, TN              | -0.144               | 12.89                     | 41.37                 |
| 47067              | Hancock, TN               | 0.14                 | 85.96                     | 76.66                 |
| 47069              | Hardeman, TN              | 0.146                | 86.72                     | 86.72                 |
| 47071              | Hardin, TN                | 0.029                | 62.91                     | 70.64                 |
| 47073              | Hawkins, TN               | 0.053                | 68.93                     | 70.8                  |
| 47075              | Haywood, TN               | -0.013               | 51.16                     | 87.17                 |

| <b>County FIPS</b> | <b>County Description</b> | <b>DOS-SVI Index</b> | <b>DOS-SVI Percentile</b> | <b>SVI Percentile</b> |
|--------------------|---------------------------|----------------------|---------------------------|-----------------------|
| 47077              | Henderson, TN             | 0.156                | 87.97                     | 69.81                 |
| 47079              | Henry, TN                 | 0.016                | 59.6                      | 63.47                 |
| 47081              | Hickman, TN               | 0.122                | 83.44                     | 56.62                 |
| 47083              | Houston, TN               | 0.092                | 78                        | 55.51                 |
| 47085              | Humphreys, TN             | 0.071                | 73.89                     | 36.88                 |
| 47087              | Jackson, TN               | 0.113                | 81.92                     | 60                    |
| 47089              | Jefferson, TN             | 0.066                | 72.49                     | 56.08                 |
| 47091              | Johnson, TN               | 0.094                | 78.16                     | 56.53                 |
| 47093              | Knox, TN                  | -0.153               | 10.92                     | 30.35                 |
| 47095              | Lake, TN                  | 0.214                | 94.02                     | 91.85                 |
| 47097              | Lauderdale, TN            | 0.173                | 90.19                     | 96.72                 |
| 47099              | Lawrence, TN              | 0.13                 | 84.5                      | 83.18                 |
| 47101              | Lewis, TN                 | 0.097                | 78.77                     | 63.63                 |
| 47103              | Lincoln, TN               | 0.049                | 68.19                     | 67.77                 |
| 47105              | Loudon, TN                | -0.081               | 31.07                     | 38.63                 |
| 47107              | McMinn, TN                | 0.047                | 67.56                     | 65.51                 |
| 47109              | McNairy, TN               | 0.135                | 85.45                     | 71.72                 |
| 47111              | Macon, TN                 | 0.061                | 71.35                     | 69.27                 |
| 47113              | Madison, TN               | -0.068               | 34.58                     | 71.24                 |
| 47115              | Marion, TN                | 0.047                | 67.78                     | 50.61                 |
| 47117              | Marshall, TN              | 0.01                 | 57.82                     | 60.99                 |
| 47119              | Maury, TN                 | -0.026               | 47.28                     | 39.49                 |
| 47121              | Meigs, TN                 | 0.164                | 89.24                     | 49.33                 |
| 47123              | Monroe, TN                | 0.161                | 88.92                     | 64.78                 |
| 47125              | Montgomery, TN            | -0.026               | 47.31                     | 51.72                 |
| 47127              | Moore, TN                 | -0.02                | 49.03                     | 9.14                  |
| 47129              | Morgan, TN                | 0.234                | 95.35                     | 74.94                 |
| 47131              | Obion, TN                 | 0.013                | 58.9                      | 76.94                 |
| 47133              | Overton, TN               | 0.099                | 79.21                     | 45.76                 |
| 47135              | Perry, TN                 | 0.195                | 92.2                      | 67.99                 |
| 47137              | Pickett, TN               | 0.07                 | 73.45                     | 41.53                 |
| 47139              | Polk, TN                  | 0.101                | 79.66                     | 49.04                 |
| 47141              | Putnam, TN                | -0.062               | 36.36                     | 61.82                 |
| 47143              | Rhea, TN                  | 0.106                | 80.64                     | 82.07                 |
| 47145              | Roane, TN                 | 0.016                | 59.53                     | 38.44                 |
| 47147              | Robertson, TN             | 0.003                | 55.46                     | 42.87                 |
| 47149              | Rutherford, TN            | -0.102               | 24.07                     | 32.68                 |
| 47151              | Scott, TN                 | 0.101                | 79.75                     | 76.37                 |
| 47153              | Sequatchie, TN            | 0.118                | 82.58                     | 57.2                  |
| 47155              | Sevier, TN                | -0.04                | 43.14                     | 61.11                 |
| 47157              | Shelby, TN                | -0.133               | 15.19                     | 78.47                 |
| 47159              | Smith, TN                 | 0.045                | 67.14                     | 26.08                 |
| 47161              | Stewart, TN               | 0.065                | 72.27                     | 40.86                 |
| 47163              | Sullivan, TN              | -0.049               | 40.37                     | 54.11                 |
| 47165              | Sumner, TN                | -0.121               | 18.59                     | 20.57                 |
| 47167              | Tipton, TN                | 0.009                | 57.31                     | 45                    |
| 47169              | Trousdale, TN             | 0.015                | 59.12                     | 52.2                  |
| 47171              | Unicoi, TN                | -0.019               | 49.57                     | 79.81                 |
| 47173              | Union, TN                 | 0.2                  | 92.68                     | 66.72                 |
| 47175              | Van Buren, TN             | 0.206                | 93.22                     | 60.25                 |
| 47177              | Warren, TN                | 0.035                | 64.79                     | 83.22                 |
| 47179              | Washington, TN            | -0.092               | 27.38                     | 45.89                 |
| 47181              | Wayne, TN                 | 0.209                | 93.6                      | 76.24                 |
| 47183              | Weakley, TN               | 0.036                | 65.01                     | 65.83                 |
| 47185              | White, TN                 | 0.1                  | 79.43                     | 59.84                 |



| <b>County FIPS</b> | <b>County Description</b> | <b>DOS-SVI Index</b> | <b>DOS-SVI Percentile</b> | <b>SVI Percentile</b> |
|--------------------|---------------------------|----------------------|---------------------------|-----------------------|
| 47187              | Williamson, TN            | -0.14                | 13.69                     | 2.1                   |
| 47189              | Wilson, TN                | -0.099               | 24.77                     | 14.65                 |
| 48001              | Anderson, TX              | 0.201                | 92.77                     | 79.46                 |
| 48003              | Andrews, TX               | 0.197                | 92.39                     | 47.36                 |
| 48005              | Angelina, TX              | 0.115                | 82.2                      | 97.71                 |
| 48007              | Aransas, TX               | -0.039               | 43.55                     | 80.19                 |
| 48009              | Archer, TX                | -0.071               | 33.75                     | 8.98                  |
| 48011              | Armstrong, TX             | -0.069               | 34.29                     | 15.99                 |
| 48013              | Atascosa, TX              | 0.274                | 97.04                     | 84.97                 |
| 48015              | Austin, TX                | 0.044                | 66.92                     | 49.36                 |
| 48017              | Bailey, TX                | 0.028                | 62.75                     | 80.03                 |
| 48019              | Bandera, TX               | -0.034               | 45.3                      | 50.76                 |
| 48021              | Bastrop, TX               | 0.159                | 88.57                     | 74.59                 |
| 48023              | Baylor, TX                | -0.102               | 24.26                     | 15.54                 |
| 48025              | Bee, TX                   | 0.323                | 98.09                     | 96.94                 |
| 48027              | Bell, TX                  | 0.011                | 58.26                     | 80.51                 |
| 48029              | Bexar, TX                 | -0.136               | 14.71                     | 82.58                 |
| 48031              | Blanco, TX                | -0.045               | 41.74                     | 27.83                 |
| 48033              | Borden, TX                | -0.074               | 32.76                     | 6.21                  |
| 48035              | Bosque, TX                | -0.005               | 53.26                     | 61.75                 |
| 48037              | Bowie, TX                 | 0.032                | 63.96                     | 85.29                 |
| 48039              | Brazoria, TX              | -0.06                | 36.96                     | 51.34                 |
| 48041              | Brazos, TX                | -0.102               | 24                        | 65.32                 |
| 48043              | Brewster, TX              | -0.048               | 40.69                     | 65.73                 |
| 48045              | Briscoe, TX               | -0.174               | 7.35                      | 45.64                 |
| 48047              | Brooks, TX                | 0.099                | 79.18                     | 100                   |
| 48049              | Brown, TX                 | -0.007               | 52.44                     | 62.77                 |
| 48051              | Burleson, TX              | 0.162                | 89.02                     | 60.8                  |
| 48053              | Burnet, TX                | -0.056               | 38.33                     | 52.99                 |
| 48055              | Caldwell, TX              | 0.169                | 89.84                     | 87.32                 |
| 48057              | Calhoun, TX               | 0.138                | 85.83                     | 86.18                 |
| 48059              | Callahan, TX              | 0.071                | 73.93                     | 29.68                 |
| 48061              | Cameron, TX               | 0.119                | 82.97                     | 97.58                 |
| 48063              | Camp, TX                  | 0.131                | 84.66                     | 90.19                 |
| 48065              | Carson, TX                | -0.115               | 20.34                     | 3.38                  |
| 48067              | Cass, TX                  | 0.155                | 87.9                      | 78.41                 |
| 48069              | Castro, TX                | 0.003                | 55.65                     | 77.74                 |
| 48071              | Chambers, TX              | 0.032                | 64.02                     | 41.08                 |
| 48073              | Cherokee, TX              | 0.182                | 90.99                     | 91.91                 |
| 48075              | Childress, TX             | 0.067                | 72.78                     | 75                    |
| 48077              | Clay, TX                  | 0.021                | 61.25                     | 31.82                 |
| 48079              | Cochran, TX               | 0.091                | 77.75                     | 86.08                 |
| 48081              | Coke, TX                  | -0.051               | 39.67                     | 62.04                 |
| 48083              | Coleman, TX               | -0.105               | 22.92                     | 41.85                 |
| 48085              | Collin, TX                | -0.237               | 2.29                      | 15.06                 |
| 48087              | Collingsworth, TX         | 0.041                | 66.38                     | 88.76                 |
| 48089              | Colorado, TX              | 0.087                | 77.05                     | 68.47                 |
| 48091              | Comal, TX                 | -0.135               | 14.93                     | 23.79                 |
| 48093              | Comanche, TX              | -0.021               | 48.87                     | 72.64                 |
| 48095              | Concho, TX                | -0.128               | 16.49                     | 42.83                 |
| 48097              | Cooke, TX                 | 0.01                 | 57.69                     | 62.26                 |
| 48099              | Coryell, TX               | 0.135                | 85.42                     | 78.09                 |
| 48101              | Cottle, TX                | 0.13                 | 84.4                      | 93.63                 |
| 48103              | Crane, TX                 | 0.108                | 80.99                     | 47.39                 |
| 48105              | Crockett, TX              | -0.021               | 48.93                     | 68.92                 |

| <b>County FIPS</b> | <b>County Description</b> | <b>DOS-SVI Index</b> | <b>DOS-SVI Percentile</b> | <b>SVI Percentile</b> |
|--------------------|---------------------------|----------------------|---------------------------|-----------------------|
| 48107              | Crosby, TX                | 0.17                 | 89.97                     | 93.95                 |
| 48109              | Culberson, TX             | 0.05                 | 68.55                     | 99.71                 |
| 48111              | Dallam, TX                | -0.091               | 27.67                     | 55.03                 |
| 48113              | Dallas, TX                | -0.201               | 4.81                      | 75.38                 |
| 48115              | Dawson, TX                | 0.101                | 79.88                     | 94.75                 |
| 48117              | Deaf Smith, TX            | -0.037               | 44.06                     | 84.11                 |
| 48119              | Delta, TX                 | 0.052                | 68.89                     | 57.04                 |
| 48121              | Denton, TX                | -0.204               | 4.49                      | 22.1                  |
| 48123              | DeWitt, TX                | 0.09                 | 77.65                     | 82.29                 |
| 48125              | Dickens, TX               | 0.166                | 89.49                     | 87.96                 |
| 48127              | Dimmit, TX                | 0.308                | 97.77                     | 99.97                 |
| 48129              | Donley, TX                | 0.021                | 61.22                     | 45.25                 |
| 48131              | Duval, TX                 | 0.169                | 89.94                     | 99.94                 |
| 48133              | Eastland, TX              | 0.068                | 73.07                     | 80.67                 |
| 48135              | Ector, TX                 | 0.002                | 55.33                     | 79.24                 |
| 48137              | Edwards, TX               | -0.069               | 34.23                     | 43.85                 |
| 48139              | Ellis, TX                 | -0.029               | 46.51                     | 39.24                 |
| 48141              | El Paso, TX               | -0.131               | 15.95                     | 95.35                 |
| 48143              | Erath, TX                 | -0.002               | 54.03                     | 62.52                 |
| 48145              | Falls, TX                 | 0.218                | 94.24                     | 97.99                 |
| 48147              | Fannin, TX                | 0.051                | 68.67                     | 57.58                 |
| 48149              | Fayette, TX               | -0.097               | 25.76                     | 43.63                 |
| 48151              | Fisher, TX                | -0.078               | 31.71                     | 43.12                 |
| 48153              | Floyd, TX                 | 0.062                | 71.47                     | 82.99                 |
| 48155              | Foard, TX                 | -0.057               | 38.2                      | 47.83                 |
| 48157              | Fort Bend, TX             | -0.14                | 13.72                     | 28.73                 |
| 48159              | Franklin, TX              | 0.021                | 61.13                     | 52.77                 |
| 48161              | Freestone, TX             | 0.109                | 81.18                     | 84.3                  |
| 48163              | Frio, TX                  | 0.185                | 91.37                     | 98.66                 |
| 48165              | Gaines, TX                | 0.27                 | 96.85                     | 68.25                 |
| 48167              | Galveston, TX             | -0.126               | 17.1                      | 58.5                  |
| 48169              | Garza, TX                 | -0.047               | 41.13                     | 72.13                 |
| 48171              | Gillespie, TX             | -0.111               | 21.46                     | 35.73                 |
| 48173              | Glasscock, TX             | -0.115               | 20.28                     | 17.61                 |
| 48175              | Goliad, TX                | 0.003                | 55.43                     | 58.15                 |
| 48177              | Gonzales, TX              | 0.242                | 95.7                      | 89.59                 |
| 48179              | Gray, TX                  | 0.041                | 66.44                     | 84.46                 |
| 48181              | Grayson, TX               | -0.028               | 46.58                     | 65.92                 |
| 48183              | Gregg, TX                 | -0.048               | 40.43                     | 88.25                 |
| 48185              | Grimes, TX                | 0.132                | 84.81                     | 86.02                 |
| 48187              | Guadalupe, TX             | -0.051               | 39.76                     | 43.44                 |
| 48189              | Hale, TX                  | 0.112                | 81.69                     | 93.12                 |
| 48191              | Hall, TX                  | -0.053               | 39.16                     | 95                    |
| 48193              | Hamilton, TX              | -0.089               | 28.46                     | 60.83                 |
| 48195              | Hansford, TX              | -0.053               | 39.29                     | 76.15                 |
| 48197              | Hardeman, TX              | 0.006                | 56.32                     | 72.8                  |
| 48199              | Hardin, TX                | 0.06                 | 70.81                     | 25.32                 |
| 48201              | Harris, TX                | -0.231               | 2.83                      | 72.36                 |
| 48203              | Harrison, TX              | 0.101                | 79.91                     | 73.06                 |
| 48205              | Hartley, TX               | 0.169                | 89.81                     | 53.44                 |
| 48207              | Haskell, TX               | 0.015                | 59.19                     | 97.55                 |
| 48209              | Hays, TX                  | -0.066               | 35.08                     | 49.24                 |
| 48211              | Hemphill, TX              | 0.134                | 85.16                     | 74.27                 |
| 48213              | Henderson, TX             | 0.059                | 70.55                     | 72.01                 |
| 48215              | Hidalgo, TX               | 0.219                | 94.4                      | 97.8                  |

| <b>County FIPS</b> | <b>County Description</b> | <b>DOS-SVI Index</b> | <b>DOS-SVI Percentile</b> | <b>SVI Percentile</b> |
|--------------------|---------------------------|----------------------|---------------------------|-----------------------|
| 48217              | Hill, TX                  | 0.122                | 83.57                     | 87.07                 |
| 48219              | Hockley, TX               | 0.152                | 87.33                     | 90.25                 |
| 48221              | Hood, TX                  | -0.096               | 26.3                      | 26.02                 |
| 48223              | Hopkins, TX               | 0.03                 | 63.52                     | 70.67                 |
| 48225              | Houston, TX               | 0.119                | 82.78                     | 91.31                 |
| 48227              | Howard, TX                | -0.041               | 42.79                     | 91.53                 |
| 48229              | Hudspeth, TX              | 0.064                | 71.95                     | 98.25                 |
| 48231              | Hunt, TX                  | 0.116                | 82.39                     | 83.41                 |
| 48233              | Hutchinson, TX            | 0.008                | 57.02                     | 66.31                 |
| 48235              | Irion, TX                 | 0.001                | 55.08                     | 20.13                 |
| 48237              | Jack, TX                  | 0.115                | 82.27                     | 65.38                 |
| 48239              | Jackson, TX               | 0.157                | 88.28                     | 67.74                 |
| 48241              | Jasper, TX                | 0.123                | 83.76                     | 82.39                 |
| 48243              | Jeff Davis, TX            | -0.151               | 11.43                     | 36.11                 |
| 48245              | Jefferson, TX             | -0.123               | 17.96                     | 85.67                 |
| 48247              | Jim Hogg, TX              | 0.218                | 94.33                     | 99.17                 |
| 48249              | Jim Wells, TX             | 0.125                | 83.86                     | 92.26                 |
| 48251              | Johnson, TX               | 0.056                | 69.63                     | 50.73                 |
| 48253              | Jones, TX                 | 0.205                | 93.09                     | 63.28                 |
| 48255              | Karnes, TX                | 0.074                | 74.53                     | 84.24                 |
| 48257              | Kaufman, TX               | 0.065                | 72.33                     | 56.91                 |
| 48259              | Kendall, TX               | -0.17                | 7.7                       | 22.83                 |
| 48261              | Kenedy, TX                | -0.112               | 21.23                     | 73.28                 |
| 48263              | Kent, TX                  | -0.023               | 48.3                      | 44.27                 |
| 48265              | Kerr, TX                  | -0.105               | 22.95                     | 69.59                 |
| 48267              | Kimble, TX                | -0.159               | 9.65                      | 58.85                 |
| 48269              | King, TX                  | -0.087               | 29.07                     | 19.55                 |
| 48271              | Kinney, TX                | -0.086               | 29.45                     | 85.61                 |
| 48273              | Kleberg, TX               | 0.129                | 84.3                      | 98.34                 |
| 48275              | Knox, TX                  | 0.001                | 54.89                     | 79.62                 |
| 48277              | Lamar, TX                 | -0.03                | 46.23                     | 83.57                 |
| 48279              | Lamb, TX                  | -0.07                | 34.1                      | 89.75                 |
| 48281              | Lampasas, TX              | 0.011                | 57.88                     | 54.43                 |
| 48283              | La Salle, TX              | 0.163                | 89.11                     | 81.91                 |
| 48285              | Lavaca, TX                | 0.134                | 85.26                     | 68.79                 |
| 48287              | Lee, TX                   | 0.042                | 66.54                     | 67.52                 |
| 48289              | Leon, TX                  | 0.03                 | 63.48                     | 61.56                 |
| 48291              | Liberty, TX               | 0.264                | 96.62                     | 94.27                 |
| 48293              | Limestone, TX             | 0.113                | 81.89                     | 95.32                 |
| 48295              | Lipscomb, TX              | 0.005                | 56.19                     | 46.05                 |
| 48297              | Live Oak, TX              | 0.069                | 73.26                     | 69.17                 |
| 48299              | Llano, TX                 | -0.12                | 18.72                     | 46.66                 |
| 48301              | Loving, TX                | 0.791                | 99.75                     | 75.73                 |
| 48303              | Lubbock, TX               | -0.091               | 27.79                     | 74.97                 |
| 48305              | Lynn, TX                  | 0.041                | 66.19                     | 89.08                 |
| 48307              | McCulloch, TX             | -0.098               | 25.18                     | 73.95                 |
| 48309              | McLennan, TX              | -0.09                | 28.08                     | 84.36                 |
| 48311              | McMullen, TX              | 0.426                | 98.92                     | 76.31                 |
| 48313              | Madison, TX               | 0.307                | 97.71                     | 83.76                 |
| 48315              | Marion, TX                | 0.12                 | 83.09                     | 68.85                 |
| 48317              | Martin, TX                | 0.186                | 91.47                     | 42.39                 |
| 48319              | Mason, TX                 | -0.17                | 7.74                      | 35.7                  |
| 48321              | Matagorda, TX             | 0.049                | 68.29                     | 90.67                 |
| 48323              | Maverick, TX              | 0.078                | 75.45                     | 97.42                 |
| 48325              | Medina, TX                | 0.06                 | 70.71                     | 66.97                 |

| <b>County FIPS</b> | <b>County Description</b> | <b>DOS-SVI Index</b> | <b>DOS-SVI Percentile</b> | <b>SVI Percentile</b> |
|--------------------|---------------------------|----------------------|---------------------------|-----------------------|
| 48327              | Menard, TX                | -0.165               | 8.72                      | 58.54                 |
| 48329              | Midland, TX               | -0.031               | 46.04                     | 47.48                 |
| 48331              | Milam, TX                 | 0.085                | 76.54                     | 76.27                 |
| 48333              | Mills, TX                 | -0.102               | 24.23                     | 76.88                 |
| 48335              | Mitchell, TX              | 0.261                | 96.56                     | 62.13                 |
| 48337              | Montague, TX              | 0.007                | 56.57                     | 58.41                 |
| 48339              | Montgomery, TX            | -0.072               | 33.4                      | 39.14                 |
| 48341              | Moore, TX                 | 0.167                | 89.75                     | 69.9                  |
| 48343              | Morris, TX                | 0.074                | 74.5                      | 72.99                 |
| 48345              | Motley, TX                | 0.051                | 68.58                     | 70.03                 |
| 48347              | Nacogdoches, TX           | 0.092                | 77.87                     | 98.22                 |
| 48349              | Navarro, TX               | 0.066                | 72.65                     | 96.62                 |
| 48351              | Newton, TX                | 0.105                | 80.45                     | 72.07                 |
| 48353              | Nolan, TX                 | 0.119                | 82.74                     | 88.66                 |
| 48355              | Nueces, TX                | -0.034               | 45.37                     | 83.63                 |
| 48357              | Ochiltree, TX             | 0.123                | 83.67                     | 57.87                 |
| 48359              | Oldham, TX                | 0.393                | 98.73                     | 43.22                 |
| 48361              | Orange, TX                | 0.049                | 68.04                     | 58.12                 |
| 48363              | Palo Pinto, TX            | 0.088                | 77.24                     | 87.99                 |
| 48365              | Panola, TX                | 0.11                 | 81.38                     | 69.52                 |
| 48367              | Parker, TX                | 0.046                | 67.46                     | 25.61                 |
| 48369              | Parmer, TX                | 0.141                | 86.22                     | 75.76                 |
| 48371              | Pecos, TX                 | 0.137                | 85.67                     | 82.13                 |
| 48373              | Polk, TX                  | 0.101                | 79.69                     | 91.21                 |
| 48375              | Potter, TX                | 0.022                | 61.35                     | 92.48                 |
| 48377              | Presidio, TX              | -0.001               | 54.38                     | 99.81                 |
| 48379              | Rains, TX                 | 0.077                | 75.23                     | 40.16                 |
| 48381              | Randall, TX               | -0.127               | 16.55                     | 22.04                 |
| 48383              | Reagan, TX                | -0.085               | 29.55                     | 48.06                 |
| 48385              | Real, TX                  | -0.034               | 45.05                     | 71.69                 |
| 48387              | Red River, TX             | -0.002               | 54.35                     | 56.5                  |
| 48389              | Reeves, TX                | 0.049                | 68.13                     | 78.03                 |
| 48391              | Refugio, TX               | 0.007                | 56.64                     | 94.14                 |
| 48393              | Roberts, TX               | -0.108               | 22.13                     | 9.11                  |
| 48395              | Robertson, TX             | 0.148                | 86.95                     | 75.29                 |
| 48397              | Rockwall, TX              | -0.064               | 35.56                     | 11.24                 |
| 48399              | Runnels, TX               | -0.089               | 28.37                     | 54.49                 |
| 48401              | Rusk, TX                  | 0.077                | 75.29                     | 79.65                 |
| 48403              | Sabine, TX                | 0.063                | 71.82                     | 53.09                 |
| 48405              | San Augustine, TX         | 0.133                | 85.07                     | 88.89                 |
| 48407              | San Jacinto, TX           | 0.164                | 89.3                      | 68.69                 |
| 48409              | San Patricio, TX          | 0.103                | 80.1                      | 83.09                 |
| 48411              | San Saba, TX              | -0.02                | 49.28                     | 73.15                 |
| 48413              | Schleicher, TX            | 0.22                 | 94.56                     | 58.57                 |
| 48415              | Scurry, TX                | 0.192                | 91.94                     | 69.94                 |
| 48417              | Shackelford, TX           | 0.179                | 90.7                      | 68.5                  |
| 48419              | Shelby, TX                | 0.153                | 87.49                     | 95.22                 |
| 48421              | Sherman, TX               | -0.037               | 44.03                     | 46.11                 |
| 48423              | Smith, TX                 | -0.044               | 41.96                     | 74.62                 |
| 48425              | Somervell, TX             | 0.215                | 94.05                     | 56.05                 |
| 48427              | Starr, TX                 | 0.207                | 93.38                     | 98.15                 |
| 48429              | Stephens, TX              | 0.01                 | 57.66                     | 88.5                  |
| 48431              | Sterling, TX              | -0.115               | 20.31                     | 41.27                 |
| 48433              | Stonewall, TX             | -0.024               | 47.82                     | 32.36                 |
| 48435              | Sutton, TX                | 0.02                 | 60.81                     | 60.41                 |

| <b>County FIPS</b> | <b>County Description</b> | <b>DOS-SVI Index</b> | <b>DOS-SVI Percentile</b> | <b>SVI Percentile</b> |
|--------------------|---------------------------|----------------------|---------------------------|-----------------------|
| 48437              | Swisher, TX               | 0.126                | 84.02                     | 97.01                 |
| 48439              | Tarrant, TX               | -0.15                | 11.62                     | 54.75                 |
| 48441              | Taylor, TX                | -0.08                | 31.36                     | 69.33                 |
| 48443              | Terrell, TX               | -0.288               | 0.8                       | 47.13                 |
| 48445              | Terry, TX                 | 0.137                | 85.64                     | 98.76                 |
| 48447              | Throckmorton, TX          | -0.169               | 7.99                      | 26.78                 |
| 48449              | Titus, TX                 | 0.185                | 91.25                     | 89.01                 |
| 48451              | Tom Green, TX             | -0.11                | 21.52                     | 66.43                 |
| 48453              | Travis, TX                | -0.25                | 1.91                      | 38.12                 |
| 48455              | Trinity, TX               | 0.113                | 81.85                     | 80.16                 |
| 48457              | Tyler, TX                 | 0.303                | 97.52                     | 88.34                 |
| 48459              | Upshur, TX                | 0.185                | 91.31                     | 58.98                 |
| 48461              | Upton, TX                 | -0.045               | 41.83                     | 65.19                 |
| 48463              | Uvalde, TX                | 0.011                | 57.98                     | 95.48                 |
| 48465              | Val Verde, TX             | 0.077                | 75.26                     | 96.78                 |
| 48467              | Van Zandt, TX             | 0.066                | 72.68                     | 55.89                 |
| 48469              | Victoria, TX              | 0.041                | 66.09                     | 78.34                 |
| 48471              | Walker, TX                | 0.084                | 76.25                     | 69.97                 |
| 48473              | Waller, TX                | 0.19                 | 91.79                     | 83.31                 |
| 48475              | Ward, TX                  | 0.115                | 82.11                     | 64.94                 |
| 48477              | Washington, TX            | 0.001                | 55.01                     | 73.12                 |
| 48479              | Webb, TX                  | 0.13                 | 84.43                     | 94.97                 |
| 48481              | Wharton, TX               | 0.015                | 59.31                     | 87.58                 |
| 48483              | Wheeler, TX               | 0.04                 | 65.93                     | 69.62                 |
| 48485              | Wichita, TX               | -0.008               | 52.24                     | 81.66                 |
| 48487              | Wilbarger, TX             | -0.031               | 45.91                     | 90.83                 |
| 48489              | Willacy, TX               | 0.226                | 94.94                     | 98.92                 |
| 48491              | Williamson, TX            | -0.171               | 7.61                      | 20.16                 |
| 48493              | Wilson, TX                | 0.135                | 85.48                     | 44.36                 |
| 48495              | Winkler, TX               | -0.013               | 51.03                     | 65.41                 |
| 48497              | Wise, TX                  | 0.104                | 80.23                     | 57.68                 |
| 48499              | Wood, TX                  | -0.061               | 36.84                     | 63.22                 |
| 48501              | Yoakum, TX                | 0.209                | 93.57                     | 49.2                  |
| 48503              | Young, TX                 | -0.031               | 45.97                     | 55.32                 |
| 48505              | Zapata, TX                | 0.489                | 99.3                      | 98.95                 |
| 48507              | Zavala, TX                | 0.206                | 93.16                     | 99.87                 |
| 49001              | Beaver, UT                | 0.209                | 93.54                     | 25.22                 |
| 49003              | Box Elder, UT             | 0.091                | 77.68                     | 15.92                 |
| 49005              | Cache, UT                 | 0.091                | 77.78                     | 32.01                 |
| 49007              | Carbon, UT                | 0.076                | 75.1                      | 56.15                 |
| 49009              | Daggett, UT               | 0.307                | 97.74                     | 7.55                  |
| 49011              | Davis, UT                 | 0.031                | 63.8                      | 7.96                  |
| 49013              | Duchesne, UT              | 0.279                | 97.23                     | 48.22                 |
| 49015              | Emery, UT                 | 0.198                | 92.61                     | 26.27                 |
| 49017              | Garfield, UT              | 0.03                 | 63.61                     | 45.92                 |
| 49019              | Grand, UT                 | 0.111                | 81.47                     | 52.13                 |
| 49021              | Iron, UT                  | 0.083                | 76.06                     | 45.25                 |
| 49023              | Juab, UT                  | 0.249                | 96.15                     | 23.31                 |
| 49025              | Kane, UT                  | -0.023               | 48.33                     | 10.54                 |
| 49027              | Millard, UT               | 0.079                | 75.55                     | 35.54                 |
| 49029              | Morgan, UT                | 0.074                | 74.69                     | 0.03                  |
| 49031              | Piute, UT                 | 0.034                | 64.5                      | 27.13                 |
| 49033              | Rich, UT                  | 0.157                | 88.12                     | 19.71                 |
| 49035              | Salt Lake, UT             | -0.077               | 32.03                     | 32.29                 |
| 49037              | San Juan, UT              | 0.369                | 98.57                     | 97.52                 |

| <b>County FIPS</b> | <b>County Description</b> | <b>DOS-SVI Index</b> | <b>DOS-SVI Percentile</b> | <b>SVI Percentile</b> |
|--------------------|---------------------------|----------------------|---------------------------|-----------------------|
| 49039              | Sanpete, UT               | 0.293                | 97.39                     | 60.19                 |
| 49041              | Sevier, UT                | 0.075                | 74.85                     | 32.61                 |
| 49043              | Summit, UT                | -0.258               | 1.5                       | 5                     |
| 49045              | Tooele, UT                | 0.122                | 83.48                     | 31.43                 |
| 49047              | Uintah, UT                | 0.207                | 93.31                     | 48.38                 |
| 49049              | Utah, UT                  | 0.18                 | 90.83                     | 27.8                  |
| 49051              | Wasatch, UT               | 0.051                | 68.64                     | 6.43                  |
| 49053              | Washington, UT            | 0.083                | 76.12                     | 41.43                 |
| 49055              | Wayne, UT                 | 0.087                | 77.08                     | 29.08                 |
| 49057              | Weber, UT                 | 0.001                | 55.11                     | 42.71                 |
| 50001              | Addison, VT               | -0.094               | 26.58                     | 9.65                  |
| 50003              | Bennington, VT            | -0.117               | 19.9                      | 29.24                 |
| 50005              | Caledonia, VT             | -0.037               | 44.09                     | 26.72                 |
| 50007              | Chittenden, VT            | -0.14                | 13.79                     | 18.31                 |
| 50009              | Essex, VT                 | -0.116               | 20.12                     | 20.67                 |
| 50011              | Franklin, VT              | -0.036               | 44.54                     | 11.11                 |
| 50013              | Grand Isle, VT            | -0.152               | 10.98                     | 0.25                  |
| 50015              | Lamoille, VT              | -0.04                | 43.27                     | 13.09                 |
| 50017              | Orange, VT                | -0.041               | 42.92                     | 17.2                  |
| 50019              | Orleans, VT               | -0.052               | 39.54                     | 42.58                 |
| 50021              | Rutland, VT               | 0.041                | 66.41                     | 27.87                 |
| 50023              | Washington, VT            | -0.154               | 10.7                      | 17.52                 |
| 50025              | Windham, VT               | -0.088               | 28.65                     | 30.54                 |
| 50027              | Windsor, VT               | -0.136               | 14.74                     | 12.8                  |
| 51001              | Accomack, VA              | -0.054               | 38.81                     | 80.25                 |
| 51003              | Albemarle, VA             | -0.224               | 3.22                      | 17.32                 |
| 51005              | Alleghany, VA             | -0.074               | 32.7                      | 44.62                 |
| 51007              | Amelia, VA                | 0.034                | 64.56                     | 31.66                 |
| 51009              | Amherst, VA               | -0.004               | 53.58                     | 46.82                 |
| 51011              | Appomattox, VA            | -0.042               | 42.63                     | 36.37                 |
| 51013              | Arlington, VA             | -0.463               | 0.1                       | 14.01                 |
| 51015              | Augusta, VA               | -0.092               | 27.54                     | 14.9                  |
| 51017              | Bath, VA                  | -0.069               | 34.16                     | 24.71                 |
| 51019              | Bedford, VA               | -0.083               | 30.28                     | 9.84                  |
| 51021              | Bland, VA                 | 0.088                | 77.27                     | 34.49                 |
| 51023              | Botetourt, VA             | -0.126               | 17.07                     | 4.14                  |
| 51025              | Brunswick, VA             | -0.003               | 53.96                     | 89.55                 |
| 51027              | Buchanan, VA              | 0.141                | 86.12                     | 75.45                 |
| 51029              | Buckingham, VA            | 0.106                | 80.52                     | 79.01                 |
| 51031              | Campbell, VA              | -0.081               | 30.91                     | 26.15                 |
| 51033              | Caroline, VA              | -0.002               | 54.22                     | 34.81                 |
| 51035              | Carroll, VA               | -0.048               | 40.72                     | 33.69                 |
| 51036              | Charles City, VA          | -0.159               | 9.71                      | 23.66                 |
| 51037              | Charlotte, VA             | -0.004               | 53.39                     | 70.57                 |
| 51041              | Chesterfield, VA          | -0.206               | 4.36                      | 17.99                 |
| 51043              | Clarke, VA                | -0.221               | 3.5                       | 11.31                 |
| 51045              | Craig, VA                 | -0.108               | 22.19                     | 7.45                  |
| 51047              | Culpeper, VA              | -0.028               | 46.61                     | 48.82                 |
| 51049              | Cumberland, VA            | -0.015               | 50.49                     | 58.31                 |
| 51051              | Dickenson, VA             | 0.116                | 82.33                     | 68.06                 |
| 51053              | Dinwiddie, VA             | -0.054               | 39.13                     | 41.82                 |
| 51057              | Essex, VA                 | -0.142               | 13.53                     | 56.34                 |
| 51059              | Fairfax, VA               | -0.306               | 0.57                      | 18.76                 |
| 51061              | Fauquier, VA              | -0.198               | 5.03                      | 2.87                  |
| 51063              | Floyd, VA                 | -0.05                | 40.18                     | 11.15                 |

| <b>County FIPS</b> | <b>County Description</b> | <b>DOS-SVI Index</b> | <b>DOS-SVI Percentile</b> | <b>SVI Percentile</b> |
|--------------------|---------------------------|----------------------|---------------------------|-----------------------|
| 51065              | Fluvanna, VA              | -0.138               | 14.26                     | 6.31                  |
| 51067              | Franklin, VA              | -0.049               | 40.21                     | 40.1                  |
| 51069              | Frederick, VA             | -0.101               | 24.48                     | 18.22                 |
| 51071              | Giles, VA                 | -0.097               | 25.72                     | 27.42                 |
| 51073              | Gloucester, VA            | -0.105               | 22.86                     | 3.66                  |
| 51075              | Goochland, VA             | -0.194               | 5.35                      | 4.59                  |
| 51077              | Grayson, VA               | 0.034                | 64.44                     | 64.59                 |
| 51079              | Greene, VA                | -0.023               | 48.39                     | 16.31                 |
| 51081              | Greensville, VA           | 0.17                 | 90                        | 81.4                  |
| 51083              | Halifax, VA               | -0.028               | 46.77                     | 67.23                 |
| 51085              | Hanover, VA               | -0.181               | 6.5                       | 1.56                  |
| 51087              | Henrico, VA               | -0.25                | 1.88                      | 25.73                 |
| 51089              | Henry, VA                 | 0.052                | 68.8                      | 88.57                 |
| 51091              | Highland, VA              | -0.253               | 1.78                      | 6.5                   |
| 51093              | Isle of Wight, VA         | -0.096               | 26.23                     | 33.92                 |
| 51095              | James City, VA            | -0.27                | 1.21                      | 11.5                  |
| 51097              | King and Queen, VA        | -0.071               | 33.78                     | 32.45                 |
| 51099              | King George, VA           | -0.078               | 31.84                     | 1.59                  |
| 51101              | King William, VA          | -0.095               | 26.36                     | 3.57                  |
| 51103              | Lancaster, VA             | -0.285               | 0.89                      | 15.83                 |
| 51105              | Lee, VA                   | 0.165                | 89.43                     | 80.73                 |
| 51107              | Loudoun, VA               | -0.201               | 4.74                      | 9.04                  |
| 51109              | Louisa, VA                | -0.024               | 47.88                     | 33.25                 |
| 51111              | Lunenburg, VA             | 0.078                | 75.49                     | 86.43                 |
| 51113              | Madison, VA               | -0.018               | 49.76                     | 16.4                  |
| 51115              | Mathews, VA               | -0.231               | 2.8                       | 2.07                  |
| 51117              | Mecklenburg, VA           | -0.039               | 43.65                     | 77.68                 |
| 51119              | Middlesex, VA             | -0.132               | 15.54                     | 20.25                 |
| 51121              | Montgomery, VA            | -0.086               | 29.51                     | 29.59                 |
| 51125              | Nelson, VA                | -0.163               | 8.91                      | 30                    |
| 51127              | New Kent, VA              | -0.092               | 27.41                     | 0.61                  |
| 51131              | Northampton, VA           | -0.169               | 8.12                      | 67.64                 |
| 51133              | Northumberland, VA        | -0.292               | 0.67                      | 12.13                 |
| 51135              | Nottoway, VA              | 0.04                 | 66.06                     | 90.96                 |
| 51137              | Orange, VA                | -0.088               | 28.56                     | 46.5                  |
| 51139              | Page, VA                  | 0.012                | 58.29                     | 39.36                 |
| 51141              | Patrick, VA               | 0.03                 | 63.45                     | 63.89                 |
| 51143              | Pittsylvania, VA          | -0.015               | 50.52                     | 64.27                 |
| 51145              | Powhatan, VA              | -0.126               | 16.94                     | 0.57                  |
| 51147              | Prince Edward, VA         | 0.003                | 55.4                      | 72.96                 |
| 51149              | Prince George, VA         | -0.034               | 45.08                     | 31.75                 |
| 51153              | Prince William, VA        | -0.183               | 6.3                       | 30.22                 |
| 51155              | Pulaski, VA               | -0.087               | 28.94                     | 48.31                 |
| 51157              | Rappahannock, VA          | -0.203               | 4.62                      | 2.13                  |
| 51159              | Richmond, VA              | 0.022                | 61.54                     | 61.43                 |
| 51161              | Roanoke, VA               | -0.236               | 2.39                      | 13.12                 |
| 51163              | Rockbridge, VA            | -0.144               | 12.96                     | 14.33                 |
| 51165              | Rockingham, VA            | -0.036               | 44.32                     | 31.97                 |
| 51167              | Russell, VA               | 0.081                | 75.87                     | 44.87                 |
| 51169              | Scott, VA                 | 0.115                | 82.14                     | 67.58                 |
| 51171              | Shenandoah, VA            | -0.125               | 17.35                     | 36.43                 |
| 51173              | Smyth, VA                 | 0.048                | 67.84                     | 75.48                 |
| 51175              | Southampton, VA           | -0.058               | 37.54                     | 47.55                 |
| 51177              | Spotsylvania, VA          | -0.105               | 23.05                     | 21.59                 |
| 51179              | Stafford, VA              | -0.17                | 7.67                      | 15.41                 |

| County FIPS | County Description           | DOS-SVI Index | DOS-SVI Percentile | SVI Percentile |
|-------------|------------------------------|---------------|--------------------|----------------|
| 51181       | Surry, VA                    | -0.077        | 32.19              | 36.59          |
| 51183       | Sussex, VA                   | 0.148         | 87.01              | 90.92          |
| 51185       | Tazewell, VA                 | 0.086         | 76.69              | 59.36          |
| 51187       | Warren, VA                   | -0.082        | 30.72              | 25.64          |
| 51191       | Washington, VA               | -0.034        | 45.27              | 36.46          |
| 51193       | Westmoreland, VA             | -0.126        | 17.13              | 29.2           |
| 51195       | Wise, VA                     | 0.165         | 89.33              | 85.99          |
| 51197       | Wythe, VA                    | 0.016         | 59.63              | 39.65          |
| 51199       | York, VA                     | -0.203        | 4.55               | 19.97          |
| 51510       | Alexandria City, VA          | -0.471        | 0.06               | 20.03          |
| 51520       | Bristol City, VA             | -0.121        | 18.69              | 75.1           |
| 51530       | Buena Vista City, VA         | -0.125        | 17.41              | 32.42          |
| 51540       | Charlottesville City,<br>VA  | -0.198        | 5.13               | 40.92          |
| 51550       | Chesapeake City, VA          | -0.161        | 9.33               | 25.92          |
| 51570       | Colonial Heights City,<br>VA | -0.151        | 11.46              | 56.85          |
| 51580       | Covington City, VA           | 0.003         | 55.37              | 46.34          |
| 51590       | Danville City, VA            | -0.058        | 37.76              | 95.89          |
| 51595       | Emporia City, VA             | 0.075         | 74.88              | 95.67          |
| 51600       | Fairfax City, VA             | -0.235        | 2.48               | 24.11          |
| 51610       | Falls Church City, VA        | -0.346        | 0.35               | 13.89          |
| 51620       | Franklin City, VA            | -0.177        | 6.84               | 71.75          |
| 51630       | Fredericksburg City,<br>VA   | -0.256        | 1.59               | 56.31          |
| 51640       | Galax City, VA               | -0.058        | 37.6               | 98.38          |
| 51650       | Hampton City, VA             | -0.154        | 10.79              | 66.75          |
| 51660       | Harrisonburg City, VA        | -0.127        | 16.65              | 79.3           |
| 51670       | Hopewell City, VA            | -0.039        | 43.36              | 94.08          |
| 51678       | Lexington City, VA           | 0.089         | 77.43              | 32.26          |
| 51680       | Lynchburg City, VA           | -0.075        | 32.63              | 73.69          |
| 51683       | Manassas City, VA            | -0.211        | 3.92               | 44.46          |
| 51685       | Manassas Park City,<br>VA    | -0.287        | 0.83               | 52.8           |
| 51690       | Martinsville City, VA        | -0.148        | 12.1               | 91.05          |
| 51700       | Newport News City,<br>VA     | -0.117        | 19.61              | 81.56          |
| 51710       | Norfolk City, VA             | -0.103        | 23.66              | 77.17          |
| 51720       | Norton City, VA              | 0.063         | 71.7               | 90.54          |
| 51730       | Petersburg City, VA          | -0.087        | 28.91              | 96.43          |
| 51735       | Poquoson City, VA            | -0.189        | 5.67               | 1.27           |
| 51740       | Portsmouth City, VA          | -0.081        | 31.01              | 80.06          |
| 51750       | Radford City, VA             | -0.079        | 31.58              | 41.24          |
| 51760       | Richmond City, VA            | -0.188        | 5.73               | 77.29          |
| 51770       | Roanoke City, VA             | -0.132        | 15.57              | 80.38          |
| 51775       | Salem City, VA               | -0.193        | 5.41               | 30.89          |
| 51790       | Staunton City, VA            | -0.206        | 4.27               | 44.49          |
| 51800       | Suffolk City, VA             | -0.125        | 17.38              | 34.68          |
| 51810       | Virginia Beach City,<br>VA   | -0.221        | 3.41               | 18.89          |
| 51820       | Waynesboro City, VA          | -0.139        | 14.07              | 60.13          |
| 51830       | Williamsburg City, VA        | -0.106        | 22.64              | 38.5           |
| 51840       | Winchester City, VA          | -0.175        | 7.23               | 72.2           |
| 53001       | Adams, WA                    | 0.333         | 98.28              | 96.21          |
| 53003       | Asotin, WA                   | -0.059        | 37.44              | 42.48          |



| <b>County FIPS</b> | <b>County Description</b> | <b>DOS-SVI Index</b> | <b>DOS-SVI Percentile</b> | <b>SVI Percentile</b> |
|--------------------|---------------------------|----------------------|---------------------------|-----------------------|
| 53005              | Benton, WA                | -0.056               | 38.46                     | 51.4                  |
| 53007              | Chelan, WA                | -0.11                | 21.68                     | 67.8                  |
| 53009              | Clallam, WA               | -0.104               | 23.37                     | 61.46                 |
| 53011              | Clark, WA                 | -0.083               | 30.34                     | 28.57                 |
| 53013              | Columbia, WA              | -0.116               | 20.09                     | 31.46                 |
| 53015              | Cowlitz, WA               | -0.003               | 53.71                     | 78.85                 |
| 53017              | Douglas, WA               | 0.057                | 69.82                     | 77.07                 |
| 53019              | Ferry, WA                 | 0.085                | 76.38                     | 82.23                 |
| 53021              | Franklin, WA              | 0.141                | 86.18                     | 86.91                 |
| 53023              | Garfield, WA              | -0.012               | 51.58                     | 18.34                 |
| 53025              | Grant, WA                 | 0.103                | 80.04                     | 84.52                 |
| 53027              | Grays Harbor, WA          | -0.019               | 49.67                     | 83.92                 |
| 53029              | Island, WA                | -0.153               | 10.95                     | 18.57                 |
| 53031              | Jefferson, WA             | -0.219               | 3.63                      | 24.14                 |
| 53033              | King, WA                  | -0.242               | 2.2                       | 28.54                 |
| 53035              | Kitsap, WA                | -0.128               | 16.52                     | 28.25                 |
| 53037              | Kittitas, WA              | -0.087               | 28.84                     | 28.31                 |
| 53039              | Klickitat, WA             | 0.061                | 71                        | 57.23                 |
| 53041              | Lewis, WA                 | 0.038                | 65.42                     | 78.89                 |
| 53043              | Lincoln, WA               | -0.04                | 43.08                     | 19.84                 |
| 53045              | Mason, WA                 | -0.003               | 53.74                     | 63.82                 |
| 53047              | Okanogan, WA              | -0.003               | 53.87                     | 92.55                 |
| 53049              | Pacific, WA               | -0.127               | 16.68                     | 73.6                  |
| 53051              | Pend Oreille, WA          | 0.058                | 70.42                     | 53.6                  |
| 53053              | Pierce, WA                | -0.099               | 24.74                     | 48.73                 |
| 53055              | San Juan, WA              | -0.223               | 3.25                      | 8.63                  |
| 53057              | Skagit, WA                | -0.024               | 47.76                     | 53.82                 |
| 53059              | Skamania, WA              | 0.018                | 60.2                      | 21.94                 |
| 53061              | Snohomish, WA             | -0.146               | 12.38                     | 27.55                 |
| 53063              | Spokane, WA               | -0.117               | 19.64                     | 48.25                 |
| 53065              | Stevens, WA               | 0.046                | 67.43                     | 46.15                 |
| 53067              | Thurston, WA              | -0.113               | 20.85                     | 32.99                 |
| 53069              | Wahkiakum, WA             | -0.147               | 12.22                     | 18.09                 |
| 53071              | Walla Walla, WA           | -0.045               | 41.64                     | 68.31                 |
| 53073              | Whatcom, WA               | -0.084               | 29.99                     | 45.41                 |
| 53075              | Whitman, WA               | -0.026               | 47.41                     | 51.08                 |
| 53077              | Yakima, WA                | 0.096                | 78.54                     | 92.77                 |
| 54001              | Barbour, WV               | 0.079                | 75.68                     | 65.13                 |
| 54003              | Berkeley, WV              | 0.013                | 58.74                     | 44.33                 |
| 54005              | Boone, WV                 | 0.236                | 95.45                     | 70.41                 |
| 54007              | Braxton, WV               | 0.203                | 93.03                     | 66.46                 |
| 54009              | Brooke, WV                | -0.058               | 37.82                     | 33.06                 |
| 54011              | Cabell, WV                | -0.049               | 40.34                     | 62.45                 |
| 54013              | Calhoun, WV               | 0.158                | 88.32                     | 52.39                 |
| 54015              | Clay, WV                  | 0.252                | 96.28                     | 68.85                 |
| 54017              | Doddridge, WV             | 0.076                | 75.07                     | 36.08                 |
| 54019              | Fayette, WV               | 0.063                | 71.67                     | 76.4                  |
| 54021              | Gilmer, WV                | 0.14                 | 86.06                     | 75.64                 |
| 54023              | Grant, WV                 | 0.01                 | 57.78                     | 36.75                 |
| 54025              | Greenbrier, WV            | 0.02                 | 60.87                     | 55.57                 |
| 54027              | Hampshire, WV             | 0.065                | 72.43                     | 64.33                 |
| 54029              | Hancock, WV               | -0.051               | 39.92                     | 40.51                 |
| 54031              | Hardy, WV                 | -0.106               | 22.57                     | 28.5                  |
| 54033              | Harrison, WV              | 0.02                 | 60.71                     | 40.89                 |
| 54035              | Jackson, WV               | 0.086                | 76.76                     | 25.29                 |

| <b>County FIPS</b> | <b>County Description</b> | <b>DOS-SVI Index</b> | <b>DOS-SVI Percentile</b> | <b>SVI Percentile</b> |
|--------------------|---------------------------|----------------------|---------------------------|-----------------------|
| 54037              | Jefferson, WV             | -0.036               | 44.48                     | 22.55                 |
| 54039              | Kanawha, WV               | -0.06                | 37.06                     | 56.56                 |
| 54041              | Lewis, WV                 | 0.073                | 74.21                     | 67.61                 |
| 54043              | Lincoln, WV               | 0.257                | 96.47                     | 60.57                 |
| 54045              | Logan, WV                 | 0.176                | 90.51                     | 74.71                 |
| 54047              | McDowell, WV              | 0.314                | 97.87                     | 90.29                 |
| 54049              | Marion, WV                | -0.009               | 52.18                     | 49.39                 |
| 54051              | Marshall, WV              | -0.014               | 50.88                     | 21.53                 |
| 54053              | Mason, WV                 | 0.143                | 86.28                     | 54.97                 |
| 54055              | Mercer, WV                | 0.014                | 59.03                     | 80.89                 |
| 54057              | Mineral, WV               | -0.053               | 39.35                     | 59.33                 |
| 54059              | Mingo, WV                 | 0.304                | 97.55                     | 78.5                  |
| 54061              | Monongalia, WV            | 0.004                | 55.72                     | 41.11                 |
| 54063              | Monroe, WV                | 0.033                | 64.22                     | 46.62                 |
| 54065              | Morgan, WV                | 0.057                | 69.95                     | 17.64                 |
| 54067              | Nicholas, WV              | 0.11                 | 81.41                     | 54.11                 |
| 54069              | Ohio, WV                  | -0.085               | 29.77                     | 31.08                 |
| 54071              | Pendleton, WV             | -0.021               | 48.71                     | 35.8                  |
| 54073              | Pleasants, WV             | 0.048                | 67.97                     | 44.68                 |
| 54075              | Pocahontas, WV            | -0.107               | 22.45                     | 49.71                 |
| 54077              | Preston, WV               | 0.111                | 81.53                     | 57.32                 |
| 54079              | Putnam, WV                | -0.048               | 40.5                      | 4.08                  |
| 54081              | Raleigh, WV               | 0.034                | 64.47                     | 76.85                 |
| 54083              | Randolph, WV              | 0.048                | 67.81                     | 58.06                 |
| 54085              | Ritchie, WV               | 0.019                | 60.52                     | 36.4                  |
| 54087              | Roane, WV                 | 0.149                | 87.07                     | 64.65                 |
| 54089              | Summers, WV               | 0.08                 | 75.71                     | 82.9                  |
| 54091              | Taylor, WV                | 0                    | 54.6                      | 49.49                 |
| 54093              | Tucker, WV                | -0.075               | 32.41                     | 36.72                 |
| 54095              | Tyler, WV                 | -0.002               | 54.16                     | 22.13                 |
| 54097              | Upshur, WV                | 0.073                | 74.15                     | 69.11                 |
| 54099              | Wayne, WV                 | 0.115                | 82.23                     | 60.06                 |
| 54101              | Webster, WV               | 0.1                  | 79.5                      | 74.87                 |
| 54103              | Wetzel, WV                | 0.003                | 55.62                     | 47.52                 |
| 54105              | Wirt, WV                  | 0.073                | 74.4                      | 37.48                 |
| 54107              | Wood, WV                  | -0.044               | 42.25                     | 37.23                 |
| 54109              | Wyoming, WV               | 0.238                | 95.58                     | 64.43                 |
| 55001              | Adams, WI                 | -0.024               | 47.91                     | 56.85                 |
| 55003              | Ashland, WI               | 0.011                | 57.85                     | 55                    |
| 55005              | Barron, WI                | -0.067               | 34.96                     | 32.71                 |
| 55007              | Bayfield, WI              | -0.139               | 14.1                      | 9.9                   |
| 55009              | Brown, WI                 | -0.139               | 14.14                     | 32.99                 |
| 55011              | Buffalo, WI               | -0.143               | 13.18                     | 5.76                  |
| 55013              | Burnett, WI               | -0.157               | 10.12                     | 16.72                 |
| 55015              | Calumet, WI               | -0.117               | 19.58                     | 1.82                  |
| 55017              | Chippewa, WI              | -0.071               | 33.68                     | 21.05                 |
| 55019              | Clark, WI                 | 0.153                | 87.68                     | 53.5                  |
| 55021              | Columbia, WI              | -0.127               | 16.59                     | 12.04                 |
| 55023              | Crawford, WI              | -0.026               | 47.25                     | 39.71                 |
| 55025              | Dane, WI                  | -0.24                | 2.23                      | 16.88                 |
| 55027              | Dodge, WI                 | -0.108               | 21.87                     | 20.19                 |
| 55029              | Door, WI                  | -0.247               | 2.01                      | 5.57                  |
| 55031              | Douglas, WI               | -0.087               | 29.2                      | 27.48                 |
| 55033              | Dunn, WI                  | -0.012               | 51.38                     | 18.47                 |
| 55035              | Eau Claire, WI            | -0.093               | 26.93                     | 21.75                 |

| <b>County FIPS</b> | <b>County Description</b> | <b>DOS-SVI Index</b> | <b>DOS-SVI Percentile</b> | <b>SVI Percentile</b> |
|--------------------|---------------------------|----------------------|---------------------------|-----------------------|
| 55037              | Florence, WI              | -0.04                | 43.2                      | 14.52                 |
| 55039              | Fond du Lac, WI           | -0.115               | 20.57                     | 20.38                 |
| 55041              | Forest, WI                | -0.055               | 38.59                     | 57.74                 |
| 55043              | Grant, WI                 | -0.022               | 48.52                     | 19.39                 |
| 55045              | Green, WI                 | -0.143               | 13.21                     | 5.29                  |
| 55047              | Green Lake, WI            | -0.062               | 36.04                     | 28.69                 |
| 55049              | Iowa, WI                  | -0.103               | 23.69                     | 1.31                  |
| 55051              | Iron, WI                  | -0.156               | 10.25                     | 36.02                 |
| 55053              | Jackson, WI               | 0.035                | 64.69                     | 50.03                 |
| 55055              | Jefferson, WI             | -0.099               | 24.9                      | 18.54                 |
| 55057              | Juneau, WI                | 0.025                | 62.27                     | 37.8                  |
| 55059              | Kenosha, WI               | -0.11                | 21.62                     | 51.11                 |
| 55061              | Kewaunee, WI              | -0.09                | 28.24                     | 5.86                  |
| 55063              | La Crosse, WI             | -0.134               | 15.03                     | 20.89                 |
| 55065              | Lafayette, WI             | -0.053               | 39.22                     | 15.96                 |
| 55067              | Langlade, WI              | -0.099               | 24.93                     | 35.35                 |
| 55069              | Lincoln, WI               | -0.12                | 18.75                     | 10.13                 |
| 55071              | Manitowoc, WI             | -0.139               | 13.98                     | 16.21                 |
| 55073              | Marathon, WI              | -0.088               | 28.72                     | 14.43                 |
| 55075              | Marinette, WI             | -0.069               | 34.13                     | 29.71                 |
| 55077              | Marquette, WI             | -0.047               | 40.88                     | 25.96                 |
| 55078              | Menominee, WI             | 0.219                | 94.43                     | 76.72                 |
| 55079              | Milwaukee, WI             | -0.149               | 12.07                     | 80.61                 |
| 55081              | Monroe, WI                | -0.017               | 50.11                     | 46.21                 |
| 55083              | Oconto, WI                | -0.061               | 36.71                     | 6.4                   |
| 55085              | Oneida, WI                | -0.182               | 6.37                      | 1.4                   |
| 55087              | Outagamie, WI             | -0.126               | 17.16                     | 9.78                  |
| 55089              | Ozaukee, WI               | -0.231               | 2.9                       | 1.34                  |
| 55091              | Pepin, WI                 | -0.123               | 17.86                     | 10.19                 |
| 55093              | Pierce, WI                | -0.103               | 23.53                     | 8.06                  |
| 55095              | Polk, WI                  | -0.104               | 23.3                      | 8.73                  |
| 55097              | Portage, WI               | -0.098               | 25.25                     | 16.53                 |
| 55099              | Price, WI                 | -0.103               | 23.59                     | 16.02                 |
| 55101              | Racine, WI                | -0.169               | 8.05                      | 45.51                 |
| 55103              | Richland, WI              | -0.073               | 33.17                     | 30.73                 |
| 55105              | Rock, WI                  | -0.111               | 21.3                      | 45.61                 |
| 55107              | Rusk, WI                  | -0.047               | 41.07                     | 34.65                 |
| 55109              | St. Croix, WI             | -0.124               | 17.54                     | 1.46                  |
| 55111              | Sauk, WI                  | -0.105               | 23.02                     | 23.44                 |
| 55113              | Sawyer, WI                | -0.107               | 22.29                     | 42.68                 |
| 55115              | Shawano, WI               | -0.097               | 25.88                     | 13.82                 |
| 55117              | Sheboygan, WI             | -0.115               | 20.38                     | 22.45                 |
| 55119              | Taylor, WI                | -0.016               | 50.33                     | 20                    |
| 55121              | Trempealeau, WI           | -0.055               | 38.62                     | 28.12                 |
| 55123              | Vernon, WI                | 0.09                 | 77.56                     | 38.34                 |
| 55125              | Vilas, WI                 | -0.201               | 4.84                      | 13.95                 |
| 55127              | Walworth, WI              | -0.13                | 16.17                     | 26.88                 |
| 55129              | Washburn, WI              | -0.121               | 18.66                     | 10.8                  |
| 55131              | Washington, WI            | -0.201               | 4.78                      | 0.99                  |
| 55133              | Waukesha, WI              | -0.226               | 3.06                      | 1.94                  |
| 55135              | Waupaca, WI               | -0.142               | 13.47                     | 18.15                 |
| 55137              | Waushara, WI              | -0.071               | 33.56                     | 36.53                 |
| 55139              | Winnebago, WI             | -0.169               | 7.9                       | 16.08                 |
| 55141              | Wood, WI                  | -0.151               | 11.37                     | 15.35                 |
| 56001              | Albany, WY                | -0.027               | 47.02                     | 24.94                 |

| <b>County FIPS</b> | <b>County Description</b> | <b>DOS-SVI Index</b> | <b>DOS-SVI Percentile</b> | <b>SVI Percentile</b> |
|--------------------|---------------------------|----------------------|---------------------------|-----------------------|
| 56003              | Big Horn, WY              | 0.066                | 72.46                     | 39.55                 |
| 56005              | Campbell, WY              | 0.086                | 76.82                     | 33.15                 |
| 56007              | Carbon, WY                | -0.004               | 53.36                     | 50.29                 |
| 56009              | Converse, WY              | 0.052                | 68.86                     | 20.48                 |
| 56011              | Crook, WY                 | 0.083                | 76                        | 3.28                  |
| 56013              | Fremont, WY               | 0.1                  | 79.4                      | 56.24                 |
| 56015              | Goshen, WY                | -0.1                 | 24.67                     | 32.64                 |
| 56017              | Hot Springs, WY           | -0.093               | 27.06                     | 12.29                 |
| 56019              | Johnson, WY               | -0.084               | 30.02                     | 17.74                 |
| 56021              | Laramie, WY               | -0.077               | 31.96                     | 26.97                 |
| 56023              | Lincoln, WY               | 0.052                | 68.74                     | 8.09                  |
| 56025              | Natrona, WY               | -0.083               | 30.21                     | 29.52                 |
| 56027              | Niobrara, WY              | 0.038                | 65.55                     | 33.6                  |
| 56029              | Park, WY                  | -0.109               | 21.81                     | 6.59                  |
| 56031              | Platte, WY                | -0.147               | 12.19                     | 9.52                  |
| 56033              | Sheridan, WY              | -0.112               | 21.17                     | 8.95                  |
| 56035              | Sublette, WY              | -0.075               | 32.6                      | 2.93                  |
| 56037              | Sweetwater, WY            | 0.014                | 58.93                     | 37.01                 |
| 56039              | Teton, WY                 | -0.05                | 40.08                     | 11.27                 |
| 56041              | Uinta, WY                 | 0.186                | 91.5                      | 45.22                 |
| 56043              | Washakie, WY              | 0.011                | 57.91                     | 37.32                 |
| 56045              | Weston, WY                | 0.029                | 63.16                     | 34.75                 |

Appendix Table 5: HF DOS-SVI and CDC SVI Percentiles by County

| County FIPS | County Description | DOS-SVI Index | DOS-SVI Percentile | SVI Percentile |
|-------------|--------------------|---------------|--------------------|----------------|
| 01001       | Autauga, AL        | -0.042        | 28.46              | 43.54          |
| 01003       | Baldwin, AL        | -0.11         | 7.35               | 21.62          |
| 01005       | Barbour, AL        | 0.002         | 57.21              | 99.59          |
| 01007       | Bibb, AL           | 0.089         | 90.07              | 60.03          |
| 01009       | Blount, AL         | -0.027        | 36.87              | 42.42          |
| 01011       | Bullock, AL        | -0.269        | 0.26               | 88.98          |
| 01013       | Butler, AL         | -0.074        | 15.44              | 86.53          |
| 01015       | Calhoun, AL        | -0.071        | 16.46              | 82.52          |
| 01017       | Chambers, AL       | -0.047        | 25.76              | 73.82          |
| 01019       | Cherokee, AL       | -0.004        | 51.93              | 45.16          |
| 01021       | Chilton, AL        | -0.026        | 37.34              | 76.02          |
| 01023       | Choctaw, AL        | -0.06         | 20.82              | 87.48          |
| 01025       | Clarke, AL         | 0.014         | 64.56              | 84.71          |
| 01027       | Clay, AL           | -0.106        | 8.15               | 56.4           |
| 01029       | Cleburne, AL       | -0.031        | 34.19              | 54.17          |
| 01031       | Coffee, AL         | -0.062        | 19.8               | 54.08          |
| 01033       | Colbert, AL        | -0.094        | 10.31              | 42.74          |
| 01035       | Conecuh, AL        | -0.116        | 6.4                | 80.86          |
| 01037       | Coosa, AL          | -0.035        | 31.96              | 52.61          |
| 01039       | Covington, AL      | -0.017        | 43.71              | 77.23          |
| 01041       | Crenshaw, AL       | -0.09         | 11.27              | 68.73          |
| 01043       | Cullman, AL        | -0.004        | 52.34              | 51.82          |
| 01045       | Dale, AL           | -0.013        | 45.34              | 75.99          |
| 01047       | Dallas, AL         | -0.055        | 22.76              | 94.9           |
| 01049       | DeKalb, AL         | -0.071        | 16.27              | 80.22          |
| 01051       | Elmore, AL         | -0.005        | 51.32              | 54.01          |
| 01053       | Escambia, AL       | 0.044         | 78.42              | 85.57          |
| 01055       | Etowah, AL         | -0.081        | 13.21              | 65.64          |
| 01057       | Fayette, AL        | -0.04         | 29.55              | 70.38          |
| 01059       | Franklin, AL       | -0.071        | 16.36              | 84.17          |
| 01061       | Geneva, AL         | -0.056        | 22.48              | 79.55          |
| 01063       | Greene, AL         | -0.067        | 17.61              | 98.54          |
| 01065       | Hale, AL           | 0.014         | 64.6               | 95.99          |
| 01067       | Henry, AL          | -0.053        | 23.3               | 55.19          |
| 01069       | Houston, AL        | -0.113        | 6.84               | 68.38          |
| 01071       | Jackson, AL        | -0.011        | 47.15              | 57.26          |
| 01073       | Jefferson, AL      | -0.146        | 3.76               | 66.21          |
| 01075       | Lamar, AL          | 0.022         | 68.7               | 62.64          |
| 01077       | Lauderdale, AL     | -0.031        | 34.07              | 44.68          |
| 01079       | Lawrence, AL       | -0.047        | 25.79              | 49.52          |
| 01081       | Lee, AL            | -0.057        | 22.03              | 66.02          |
| 01083       | Limestone, AL      | -0.013        | 45.3               | 52.96          |
| 01085       | Lowndes, AL        | -0.145        | 3.79               | 91.88          |
| 01087       | Macon, AL          | 0.022         | 68.64              | 89.71          |
| 01089       | Madison, AL        | -0.086        | 12.1               | 30.76          |
| 01091       | Marengo, AL        | -0.052        | 23.66              | 76.21          |
| 01093       | Marion, AL         | -0.033        | 32.76              | 67.1           |
| 01095       | Marshall, AL       | -0.076        | 14.8               | 72.61          |
| 01097       | Mobile, AL         | -0.107        | 7.93               | 75.32          |
| 01099       | Monroe, AL         | -0.008        | 49.6               | 74.81          |
| 01101       | Montgomery, AL     | -0.162        | 2.67               | 84.27          |
| 01103       | Morgan, AL         | -0.066        | 18.34              | 68.95          |
| 01105       | Perry, AL          | -0.028        | 36.1               | 99.49          |
| 01107       | Pickens, AL        | -0.008        | 49.16              | 92.07          |

| County FIPS | County Description               | DOS-SVI Index | DOS-SVI Percentile | SVI Percentile |
|-------------|----------------------------------|---------------|--------------------|----------------|
| 01109       | Pike, AL                         | -0.063        | 19.55              | 90.16          |
| 01111       | Randolph, AL                     | 0.018         | 66.7               | 71.91          |
| 01113       | Russell, AL                      | -0.038        | 30.69              | 91.15          |
| 01115       | St. Clair, AL                    | -0.02         | 41.96              | 36.56          |
| 01117       | Shelby, AL                       | -0.041        | 28.78              | 11.69          |
| 01119       | Sumter, AL                       | -0.03         | 35.02              | 95.57          |
| 01121       | Talladega, AL                    | -0.05         | 24.55              | 87.36          |
| 01123       | Tallapoosa, AL                   | -0.004        | 51.67              | 88.63          |
| 01125       | Tuscaloosa, AL                   | -0.122        | 5.67               | 62.55          |
| 01127       | Walker, AL                       | 0.001         | 55.87              | 74.52          |
| 01129       | Washington, AL                   | -0.014        | 45.27              | 73.03          |
| 01131       | Wilcox, AL                       | 0.017         | 66.03              | 92.8           |
| 01133       | Winston, AL                      | -0.033        | 32.79              | 70.25          |
| 02013       | Aleutians East, AK               | 0.209         | 97.9               | 58.03          |
| 02016       | Aleutians West, AK               | 0.395         | 99.39              | 49.27          |
| 02020       | Anchorage, AK                    | 0.027         | 70.81              | 46.02          |
| 02050       | Bethel, AK                       | 1.575         | 99.9               | 97.48          |
| 02060       | Bristol Bay, AK                  | 0.23          | 98.19              | 35.25          |
| 02068       | Denali, AK                       | 0.455         | 99.65              | 10.1           |
| 02070       | Dillingham, AK                   | 0.989         | 99.81              | 86.82          |
| 02090       | Fairbanks North Star,<br>AK      | 0.18          | 97.1               | 34.46          |
| 02100       | Haines, AK                       | 0.326         | 99.01              | 20.7           |
| 02105       | Hoonah-Angoon, AK                | 0.338         | 99.14              | 41.78          |
| 02110       | Juneau City and<br>Borough, AK   | 0.124         | 94.24              | 29.87          |
| 02122       | Kenai Peninsula, AK              | 0.156         | 96.08              | 40.73          |
| 02130       | Ketchikan Gateway,<br>AK         | 0.046         | 79.21              | 55.48          |
| 02150       | Kodiak Island, AK                | 0.127         | 94.49              | 70.06          |
| 02158       | Kusilvak, AK                     | 2.29          | 100                | 93.34          |
| 02164       | Lake and Peninsula, AK           | 0.575         | 99.68              | 79.78          |
| 02170       | Matanuska-Susitna, AK            | 0.174         | 96.82              | 31.72          |
| 02180       | Nome, AK                         | 1.369         | 99.87              | 92.99          |
| 02185       | North Slope, AK                  | 1.594         | 99.94              | 73.44          |
| 02188       | Northwest Arctic, AK             | 1.603         | 99.97              | 93.54          |
| 02195       | Petersburg, AK                   | 0.085         | 89.33              | 66.5           |
| 02198       | Prince of Wales-Hyder,<br>AK     | 0.18          | 97.14              | 76.62          |
| 02220       | Sitka City and Borough,<br>AK    | 0.084         | 89.21              | 40.22          |
| 02230       | Skagway, AK                      | 0.309         | 98.85              | 16.85          |
| 02240       | Southeast Fairbanks,<br>AK       | 0.351         | 99.27              | 58.38          |
| 02261       | Valdez-Cordova, AK               | 0.104         | 92.17              | 27.04          |
| 02275       | Wrangell City and<br>Borough, AK | 0.063         | 84.53              | 56.18          |
| 02282       | Yakutat City and<br>Borough, AK  | 0.283         | 98.63              | 58.73          |
| 02290       | Yukon-Koyukuk, AK                | 0.889         | 99.78              | 88.12          |
| 04001       | Apache, AZ                       | 0.299         | 98.76              | 98.85          |
| 04003       | Cochise, AZ                      | -0.054        | 23.18              | 90.64          |
| 04005       | Coconino, AZ                     | 0.213         | 97.99              | 71.31          |
| 04007       | Gila, AZ                         | 0.014         | 64.12              | 89.9           |
| 04009       | Graham, AZ                       | 0.213         | 97.96              | 96.4           |

| County FIPS | County Description | DOS-SVI Index | DOS-SVI Percentile | SVI Percentile |
|-------------|--------------------|---------------|--------------------|----------------|
| 04011       | Greenlee, AZ       | 0             | 55.17              | 61.88          |
| 04012       | La Paz, AZ         | -0.011        | 47.31              | 92.36          |
| 04013       | Maricopa, AZ       | -0.086        | 12.16              | 63.54          |
| 04015       | Mohave, AZ         | 0.001         | 56.61              | 86.24          |
| 04017       | Navajo, AZ         | 0.208         | 97.8               | 99.55          |
| 04019       | Pima, AZ           | -0.074        | 15.63              | 88.28          |
| 04021       | Pinal, AZ          | 0.058         | 82.94              | 85.92          |
| 04023       | Santa Cruz, AZ     | -0.253        | 0.38               | 93.18          |
| 04025       | Yavapai, AZ        | 0.004         | 58.1               | 52.1           |
| 04027       | Yuma, AZ           | -0.082        | 12.93              | 98.95          |
| 05001       | Arkansas, AR       | -0.072        | 16.11              | 77.87          |
| 05003       | Ashley, AR         | -0.064        | 18.94              | 85.76          |
| 05005       | Baxter, AR         | -0.009        | 48.84              | 27.93          |
| 05007       | Benton, AR         | -0.012        | 46.48              | 27.07          |
| 05009       | Boone, AR          | 0.02          | 67.62              | 43.79          |
| 05011       | Bradley, AR        | -0.046        | 26.46              | 98.03          |
| 05013       | Calhoun, AR        | -0.03         | 34.61              | 54.81          |
| 05015       | Carroll, AR        | 0.115         | 93.44              | 59.52          |
| 05017       | Chicot, AR         | -0.078        | 14.29              | 99.68          |
| 05019       | Clark, AR          | 0.038         | 76.19              | 78.92          |
| 05021       | Clay, AR           | -0.093        | 10.6               | 65.29          |
| 05023       | Cleburne, AR       | -0.046        | 26.62              | 20.83          |
| 05025       | Cleveland, AR      | -0.049        | 24.96              | 56.43          |
| 05027       | Columbia, AR       | 0.054         | 81.66              | 93.98          |
| 05029       | Conway, AR         | -0.022        | 40.05              | 75.89          |
| 05031       | Craighead, AR      | -0.06         | 20.85              | 80.41          |
| 05033       | Crawford, AR       | -0.011        | 47.25              | 61.05          |
| 05035       | Crittenden, AR     | -0.071        | 16.33              | 93.41          |
| 05037       | Cross, AR          | -0.05         | 24.61              | 70.13          |
| 05039       | Dallas, AR         | -0.002        | 53.49              | 87.77          |
| 05041       | Desha, AR          | -0.092        | 10.73              | 95.96          |
| 05043       | Drew, AR           | -0.021        | 41.26              | 80.1           |
| 05045       | Faulkner, AR       | -0.006        | 51.07              | 47.74          |
| 05047       | Franklin, AR       | 0.05          | 80.67              | 59.43          |
| 05049       | Fulton, AR         | 0.049         | 79.94              | 66.88          |
| 05051       | Garland, AR        | -0.077        | 14.58              | 82.8           |
| 05053       | Grant, AR          | -0.006        | 51                 | 35.41          |
| 05055       | Greene, AR         | 0             | 55.27              | 58.34          |
| 05057       | Hempstead, AR      | -0.136        | 4.27               | 94.68          |
| 05059       | Hot Spring, AR     | 0.078         | 88.44              | 81.88          |
| 05061       | Howard, AR         | -0.094        | 10.47              | 90.45          |
| 05063       | Independence, AR   | -0.024        | 39.19              | 75.25          |
| 05065       | Izard, AR          | 0.11          | 92.77              | 56.97          |
| 05067       | Jackson, AR        | 0.138         | 95.22              | 76.5           |
| 05069       | Jefferson, AR      | -0.009        | 48.93              | 94.36          |
| 05071       | Johnson, AR        | -0.026        | 37.12              | 87.68          |
| 05073       | Lafayette, AR      | -0.064        | 18.98              | 78.98          |
| 05075       | Lawrence, AR       | -0.001        | 54.51              | 64.71          |
| 05077       | Lee, AR            | 0.153         | 95.99              | 96.56          |
| 05079       | Lincoln, AR        | 0.443         | 99.62              | 81.34          |
| 05081       | Little River, AR   | -0.01         | 47.82              | 63.06          |
| 05083       | Logan, AR          | -0.009        | 48.77              | 80.45          |
| 05085       | Lonoke, AR         | -0.009        | 48.52              | 33.09          |
| 05087       | Madison, AR        | 0.03          | 72.46              | 65.35          |
| 05089       | Marion, AR         | 0.011         | 62.75              | 51.75          |

| <b>County FIPS</b> | <b>County Description</b> | <b>DOS-SVI Index</b> | <b>DOS-SVI Percentile</b> | <b>SVI Percentile</b> |
|--------------------|---------------------------|----------------------|---------------------------|-----------------------|
| 05091              | Miller, AR                | -0.028               | 36.23                     | 91.24                 |
| 05093              | Mississippi, AR           | -0.026               | 37.5                      | 95.54                 |
| 05095              | Monroe, AR                | -0.144               | 3.85                      | 85.16                 |
| 05097              | Montgomery, AR            | -0.018               | 42.82                     | 70                    |
| 05099              | Nevada, AR                | 0.033                | 73.64                     | 88.41                 |
| 05101              | Newton, AR                | 0.002                | 56.83                     | 28.15                 |
| 05103              | Ouachita, AR              | -0.035               | 31.55                     | 86.56                 |
| 05105              | Perry, AR                 | 0.116                | 93.5                      | 63.6                  |
| 05107              | Phillips, AR              | -0.177               | 1.94                      | 92.39                 |
| 05109              | Pike, AR                  | -0.022               | 40.5                      | 71.24                 |
| 05111              | Poinsett, AR              | 0.031                | 72.91                     | 82.68                 |
| 05113              | Polk, AR                  | 0.067                | 85.77                     | 89.49                 |
| 05115              | Pope, AR                  | -0.01                | 48.17                     | 79.36                 |
| 05117              | Prairie, AR               | 0.049                | 80.07                     | 65.48                 |
| 05119              | Pulaski, AR               | -0.174               | 2.13                      | 62.87                 |
| 05121              | Randolph, AR              | -0.028               | 36.36                     | 71.66                 |
| 05123              | St. Francis, AR           | 0.076                | 87.61                     | 96.91                 |
| 05125              | Saline, AR                | -0.025               | 38.33                     | 33.25                 |
| 05127              | Scott, AR                 | 0.072                | 86.69                     | 88.73                 |
| 05129              | Searcy, AR                | -0.024               | 38.87                     | 43.76                 |
| 05131              | Sebastian, AR             | -0.1                 | 9.11                      | 83.28                 |
| 05133              | Sevier, AR                | 0.054                | 81.63                     | 76.75                 |
| 05135              | Sharp, AR                 | -0.026               | 37.25                     | 61.91                 |
| 05137              | Stone, AR                 | -0.052               | 23.88                     | 51.02                 |
| 05139              | Union, AR                 | 0.04                 | 76.79                     | 80.54                 |
| 05141              | Van Buren, AR             | -0.02                | 41.52                     | 72.26                 |
| 05143              | Washington, AR            | -0.075               | 15.35                     | 67.45                 |
| 05145              | White, AR                 | 0.001                | 55.97                     | 74.46                 |
| 05147              | Woodruff, AR              | -0.097               | 9.81                      | 84.9                  |
| 05149              | Yell, AR                  | -0.006               | 50.49                     | 87.83                 |
| 06001              | Alameda, CA               | -0.012               | 46.23                     | 47.01                 |
| 06003              | Alpine, CA                | -0.08                | 13.69                     | 72.87                 |
| 06005              | Amador, CA                | 0.135                | 94.94                     | 53.34                 |
| 06007              | Butte, CA                 | 0.002                | 56.96                     | 80.64                 |
| 06009              | Calaveras, CA             | -0.038               | 30.47                     | 23.5                  |
| 06011              | Colusa, CA                | -0.185               | 1.69                      | 74.36                 |
| 06013              | Contra Costa, CA          | -0.068               | 17.38                     | 40.57                 |
| 06015              | Del Norte, CA             | 0.159                | 96.24                     | 97.13                 |
| 06017              | El Dorado, CA             | 0.014                | 64.63                     | 18.38                 |
| 06019              | Fresno, CA                | -0.047               | 25.95                     | 96.11                 |
| 06021              | Glenn, CA                 | -0.151               | 3.44                      | 88.95                 |
| 06023              | Humboldt, CA              | 0.041                | 77.14                     | 76.05                 |
| 06025              | Imperial, CA              | -0.037               | 30.91                     | 99.78                 |
| 06027              | Inyo, CA                  | 0                    | 55.72                     | 57.01                 |
| 06029              | Kern, CA                  | 0.035                | 74.66                     | 96.59                 |
| 06031              | Kings, CA                 | 0.017                | 66.09                     | 97.07                 |
| 06033              | Lake, CA                  | -0.031               | 34.35                     | 91.78                 |
| 06035              | Lassen, CA                | 0.29                 | 98.69                     | 59.97                 |
| 06037              | Los Angeles, CA           | -0.053               | 23.37                     | 76.82                 |
| 06039              | Madera, CA                | 0.018                | 66.92                     | 95.41                 |
| 06041              | Marin, CA                 | -0.014               | 44.83                     | 27.01                 |
| 06043              | Mariposa, CA              | 0.065                | 85.16                     | 52.93                 |
| 06045              | Mendocino, CA             | 0.016                | 65.81                     | 88.18                 |
| 06047              | Merced, CA                | -0.03                | 35.24                     | 97.17                 |
| 06049              | Modoc, CA                 | 0.06                 | 83.48                     | 75.16                 |



| <b>County FIPS</b> | <b>County Description</b> | <b>DOS-SVI Index</b> | <b>DOS-SVI Percentile</b> | <b>SVI Percentile</b> |
|--------------------|---------------------------|----------------------|---------------------------|-----------------------|
| 06051              | Mono, CA                  | -0.12                | 5.92                      | 14.08                 |
| 06053              | Monterey, CA              | 0.061                | 84.02                     | 79.9                  |
| 06055              | Napa, CA                  | 0.009                | 61.29                     | 50.51                 |
| 06057              | Nevada, CA                | -0.002               | 53.65                     | 20.45                 |
| 06059              | Orange, CA                | -0.02                | 41.9                      | 41.91                 |
| 06061              | Placer, CA                | -0.013               | 45.69                     | 15.19                 |
| 06063              | Plumas, CA                | -0.003               | 52.79                     | 26.53                 |
| 06065              | Riverside, CA             | -0.011               | 46.77                     | 79.39                 |
| 06067              | Sacramento, CA            | -0.086               | 12.03                     | 73.38                 |
| 06069              | San Benito, CA            | 0.012                | 63.42                     | 52.45                 |
| 06071              | San Bernardino, CA        | 0.026                | 70.36                     | 90.1                  |
| 06073              | San Diego, CA             | -0.051               | 24.23                     | 55.96                 |
| 06075              | San Francisco, CA         | 0.002                | 56.99                     | 39.11                 |
| 06077              | San Joaquin, CA           | -0.036               | 31.45                     | 88.92                 |
| 06079              | San Luis Obispo, CA       | 0.028                | 71.31                     | 37.39                 |
| 06081              | San Mateo, CA             | -0.002               | 53.61                     | 26.5                  |
| 06083              | Santa Barbara, CA         | 0.083                | 88.95                     | 71.11                 |
| 06085              | Santa Clara, CA           | -0.02                | 41.87                     | 35.57                 |
| 06087              | Santa Cruz, CA            | 0.083                | 88.92                     | 54.3                  |
| 06089              | Shasta, CA                | 0.025                | 69.88                     | 70.22                 |
| 06091              | Sierra, CA                | -0.023               | 39.86                     | 4.52                  |
| 06093              | Siskiyou, CA              | 0.017                | 66.06                     | 72.23                 |
| 06095              | Solano, CA                | -0.031               | 33.94                     | 59.11                 |
| 06097              | Sonoma, CA                | -0.004               | 52.09                     | 40.35                 |
| 06099              | Stanislaus, CA            | -0.046               | 26.39                     | 86.75                 |
| 06101              | Sutter, CA                | -0.087               | 11.84                     | 88.22                 |
| 06103              | Tehama, CA                | 0.039                | 76.63                     | 96.24                 |
| 06105              | Trinity, CA               | -0.003               | 53.33                     | 74.11                 |
| 06107              | Tulare, CA                | -0.069               | 17.22                     | 94.17                 |
| 06109              | Tuolumne, CA              | 0.102                | 92.01                     | 46.88                 |
| 06111              | Ventura, CA               | -0.035               | 31.61                     | 48.28                 |
| 06113              | Yolo, CA                  | -0.018               | 43.01                     | 67.68                 |
| 06115              | Yuba, CA                  | 0.058                | 82.97                     | 94.2                  |
| 08001              | Adams, CO                 | -0.112               | 7.07                      | 58.92                 |
| 08003              | Alamosa, CO               | 0.044                | 78.54                     | 94.52                 |
| 08005              | Arapahoe, CO              | -0.161               | 2.71                      | 26.62                 |
| 08007              | Archuleta, CO             | 0.083                | 89.05                     | 25.7                  |
| 08009              | Baca, CO                  | -0.065               | 18.53                     | 60.86                 |
| 08011              | Bent, CO                  | 0.28                 | 98.53                     | 89.81                 |
| 08013              | Boulder, CO               | -0.066               | 18.31                     | 17.04                 |
| 08014              | Broomfield, CO            | -0.102               | 8.85                      | 4.9                   |
| 08015              | Chaffee, CO               | 0.035                | 74.91                     | 23.89                 |
| 08017              | Cheyenne, CO              | 0.063                | 84.4                      | 25.89                 |
| 08019              | Clear Creek, CO           | -0.012               | 46.45                     | 1.97                  |
| 08021              | Conejos, CO               | 0.011                | 62.66                     | 93.25                 |
| 08023              | Costilla, CO              | -0.199               | 1.27                      | 93.79                 |
| 08025              | Crowley, CO               | 0.197                | 97.64                     | 89.3                  |
| 08027              | Custer, CO                | 0.018                | 66.67                     | 24.33                 |
| 08029              | Delta, CO                 | 0.069                | 86.15                     | 68.66                 |
| 08031              | Denver, CO                | -0.246               | 0.45                      | 41.97                 |
| 08033              | Dolores, CO               | -0.059               | 21.17                     | 15.16                 |
| 08035              | Douglas, CO               | -0.031               | 34.32                     | 1.5                   |
| 08037              | Eagle, CO                 | -0.15                | 3.5                       | 13.69                 |
| 08039              | Elbert, CO                | 0.073                | 87.01                     | 0                     |
| 08041              | El Paso, CO               | -0.026               | 37.54                     | 39.27                 |

| <b>County FIPS</b> | <b>County Description</b>   | <b>DOS-SVI Index</b> | <b>DOS-SVI Percentile</b> | <b>SVI Percentile</b> |
|--------------------|-----------------------------|----------------------|---------------------------|-----------------------|
| 08043              | Fremont, CO                 | 0.193                | 97.52                     | 65.25                 |
| 08045              | Garfield, CO                | 0.077                | 88                        | 35.1                  |
| 08047              | Gilpin, CO                  | 0.066                | 85.39                     | 0.22                  |
| 08049              | Grand, CO                   | -0.03                | 34.92                     | 9.87                  |
| 08051              | Gunnison, CO                | 0.04                 | 76.73                     | 13.92                 |
| 08053              | Hinsdale, CO                | 0.034                | 74.21                     | 6.24                  |
| 08055              | Huerfano, CO                | -0.008               | 49.57                     | 59.55                 |
| 08057              | Jackson, CO                 | -0.022               | 40.91                     | 11.37                 |
| 08059              | Jefferson, CO               | -0.084               | 12.58                     | 6.27                  |
| 08061              | Kiowa, CO                   | -0.02                | 42.09                     | 31.88                 |
| 08063              | Kit Carson, CO              | -0.033               | 33.05                     | 51.53                 |
| 08065              | Lake, CO                    | -0.078               | 14.36                     | 44.52                 |
| 08067              | La Plata, CO                | 0.055                | 82.14                     | 10.86                 |
| 08069              | Larimer, CO                 | -0.027               | 36.58                     | 11.94                 |
| 08071              | Las Animas, CO              | 0.009                | 61.51                     | 83.73                 |
| 08073              | Lincoln, CO                 | 0.33                 | 99.08                     | 48.57                 |
| 08075              | Logan, CO                   | 0.033                | 73.8                      | 62.8                  |
| 08077              | Mesa, CO                    | -0.013               | 45.94                     | 57.55                 |
| 08079              | Mineral, CO                 | -0.075               | 15.28                     | 2.61                  |
| 08081              | Moffat, CO                  | -0.069               | 17.13                     | 54.71                 |
| 08083              | Montezuma, CO               | 0.001                | 56.26                     | 49.46                 |
| 08085              | Montrose, CO                | 0.002                | 56.89                     | 71.53                 |
| 08087              | Morgan, CO                  | -0.123               | 5.41                      | 74.14                 |
| 08089              | Otero, CO                   | -0.155               | 3.02                      | 95.61                 |
| 08091              | Ouray, CO                   | 0.007                | 59.88                     | 2.39                  |
| 08093              | Park, CO                    | 0.077                | 87.87                     | 0.06                  |
| 08095              | Phillips, CO                | 0.083                | 89.14                     | 29.55                 |
| 08097              | Pitkin, CO                  | -0.159               | 2.83                      | 6.56                  |
| 08099              | Prowers, CO                 | -0.033               | 32.89                     | 93.92                 |
| 08101              | Pueblo, CO                  | -0.076               | 15.06                     | 86.69                 |
| 08103              | Rio Blanco, CO              | 0.112                | 93.03                     | 34.01                 |
| 08105              | Rio Grande, CO              | 0.048                | 79.85                     | 95.86                 |
| 08107              | Routt, CO                   | -0.043               | 28.3                      | 6.34                  |
| 08109              | Saguache, CO                | 0.114                | 93.19                     | 80.7                  |
| 08111              | San Juan, CO                | -0.017               | 43.81                     | 12.83                 |
| 08113              | San Miguel, CO              | -0.114               | 6.78                      | 3.31                  |
| 08115              | Sedgwick, CO                | 0.015                | 65.3                      | 69.36                 |
| 08117              | Summit, CO                  | -0.1                 | 9.2                       | 7.07                  |
| 08119              | Teller, CO                  | 0.017                | 66.19                     | 7.29                  |
| 08121              | Washington, CO              | 0.081                | 88.73                     | 28.22                 |
| 08123              | Weld, CO                    | -0.022               | 40.88                     | 39.94                 |
| 08125              | Yuma, CO                    | -0.007               | 50.08                     | 56.37                 |
| 09001              | Fairfield, CT               | -0.09                | 11.18                     | 44.97                 |
| 09003              | Hartford, CT                | -0.109               | 7.54                      | 51.5                  |
| 09005              | Litchfield, CT              | -0.009               | 48.9                      | 8.18                  |
| 09007              | Middlesex, CT               | -0.023               | 39.73                     | 11.82                 |
| 09009              | New Haven, CT               | -0.067               | 17.77                     | 52.23                 |
| 09011              | New London, CT              | -0.06                | 20.89                     | 35.61                 |
| 09013              | Tolland, CT                 | 0.076                | 87.65                     | 6.94                  |
| 09015              | Windham, CT                 | -0.018               | 43.46                     | 42.32                 |
| 10001              | Kent, DE                    | -0.075               | 15.12                     | 72.68                 |
| 10003              | New Castle, DE              | -0.108               | 7.74                      | 37.61                 |
| 10005              | Sussex, DE                  | -0.071               | 16.3                      | 40.19                 |
| 11001              | District of Columbia,<br>DC | -0.027               | 36.8                      | 59.65                 |

| <b>County FIPS</b> | <b>County Description</b> | <b>DOS-SVI Index</b> | <b>DOS-SVI Percentile</b> | <b>SVI Percentile</b> |
|--------------------|---------------------------|----------------------|---------------------------|-----------------------|
| 12001              | Alachua, FL               | -0.077               | 14.49                     | 47.29                 |
| 12003              | Baker, FL                 | 0.098                | 91.53                     | 68.03                 |
| 12005              | Bay, FL                   | -0.137               | 4.14                      | 60.76                 |
| 12007              | Bradford, FL              | 0.079                | 88.47                     | 92.64                 |
| 12009              | Brevard, FL               | -0.108               | 7.86                      | 37.13                 |
| 12011              | Broward, FL               | -0.298               | 0.16                      | 58.44                 |
| 12013              | Calhoun, FL               | 0.189                | 97.42                     | 84.01                 |
| 12015              | Charlotte, FL             | -0.081               | 13.28                     | 48.89                 |
| 12017              | Citrus, FL                | -0.024               | 38.62                     | 60.22                 |
| 12019              | Clay, FL                  | -0.045               | 27.25                     | 38.03                 |
| 12021              | Collier, FL               | -0.265               | 0.35                      | 46.18                 |
| 12023              | Columbia, FL              | 0.117                | 93.54                     | 85.96                 |
| 12027              | DeSoto, FL                | -0.021               | 41.2                      | 96.18                 |
| 12029              | Dixie, FL                 | 0.182                | 97.23                     | 89.94                 |
| 12031              | Duval, FL                 | -0.147               | 3.69                      | 69.2                  |
| 12033              | Escambia, FL              | -0.021               | 41.23                     | 48.63                 |
| 12035              | Flagler, FL               | -0.118               | 6.14                      | 27.99                 |
| 12037              | Franklin, FL              | 0.147                | 95.64                     | 80.83                 |
| 12039              | Gadsden, FL               | -0.006               | 50.56                     | 99.01                 |
| 12041              | Gilchrist, FL             | 0.035                | 74.94                     | 75.67                 |
| 12043              | Glades, FL                | 0.029                | 71.89                     | 90.48                 |
| 12045              | Gulf, FL                  | 0.095                | 90.96                     | 59.2                  |
| 12047              | Hamilton, FL              | 0.21                 | 97.93                     | 99.08                 |
| 12049              | Hardee, FL                | 0.1                  | 91.72                     | 98.31                 |
| 12051              | Hendry, FL                | -0.122               | 5.7                       | 99.39                 |
| 12053              | Hernando, FL              | -0.071               | 16.4                      | 54.9                  |
| 12055              | Highlands, FL             | -0.022               | 40.72                     | 87.29                 |
| 12057              | Hillsborough, FL          | -0.17                | 2.2                       | 67.01                 |
| 12059              | Holmes, FL                | 0.07                 | 86.28                     | 93.47                 |
| 12061              | Indian River, FL          | -0.121               | 5.83                      | 39.62                 |
| 12063              | Jackson, FL               | 0.181                | 97.17                     | 95.83                 |
| 12065              | Jefferson, FL             | 0.109                | 92.68                     | 57.48                 |
| 12067              | Lafayette, FL             | 0.302                | 98.79                     | 98.06                 |
| 12069              | Lake, FL                  | -0.054               | 22.95                     | 60.29                 |
| 12071              | Lee, FL                   | -0.19                | 1.59                      | 55.25                 |
| 12073              | Leon, FL                  | -0.093               | 10.57                     | 49.43                 |
| 12075              | Levy, FL                  | -0.013               | 45.97                     | 77.93                 |
| 12077              | Liberty, FL               | 0.16                 | 96.31                     | 83.34                 |
| 12079              | Madison, FL               | 0.136                | 95.06                     | 96.08                 |
| 12081              | Manatee, FL               | -0.12                | 5.86                      | 51.97                 |
| 12083              | Marion, FL                | -0.033               | 32.7                      | 75.35                 |
| 12085              | Martin, FL                | -0.1                 | 9.23                      | 39.9                  |
| 12086              | Miami-Dade, FL            | -0.455               | 0.03                      | 81.75                 |
| 12087              | Monroe, FL                | -0.047               | 26.14                     | 45.57                 |
| 12089              | Nassau, FL                | -0.063               | 19.64                     | 24.59                 |
| 12091              | Okaloosa, FL              | -0.083               | 12.77                     | 38.6                  |
| 12093              | Okeechobee, FL            | 0.012                | 62.88                     | 94.65                 |
| 12095              | Orange, FL                | -0.225               | 0.8                       | 66.91                 |
| 12097              | Osceola, FL               | -0.24                | 0.51                      | 81.78                 |
| 12099              | Palm Beach, FL            | -0.228               | 0.73                      | 55.92                 |
| 12101              | Pasco, FL                 | -0.057               | 22.29                     | 63.44                 |
| 12103              | Pinellas, FL              | -0.166               | 2.42                      | 51.69                 |
| 12105              | Polk, FL                  | -0.051               | 24.2                      | 90.35                 |
| 12107              | Putnam, FL                | -0.004               | 52.47                     | 95.25                 |
| 12109              | St. Johns, FL             | -0.063               | 19.74                     | 7.61                  |

| <b>County FIPS</b> | <b>County Description</b> | <b>DOS-SVI Index</b> | <b>DOS-SVI Percentile</b> | <b>SVI Percentile</b> |
|--------------------|---------------------------|----------------------|---------------------------|-----------------------|
| 12111              | St. Lucie, FL             | -0.156               | 2.99                      | 71.85                 |
| 12113              | Santa Rosa, FL            | 0.009                | 61.13                     | 30.96                 |
| 12115              | Sarasota, FL              | -0.147               | 3.73                      | 25.38                 |
| 12117              | Seminole, FL              | -0.123               | 5.48                      | 18.44                 |
| 12119              | Sumter, FL                | -0.007               | 50.05                     | 23.6                  |
| 12121              | Suwannee, FL              | 0.015                | 64.98                     | 94.24                 |
| 12123              | Taylor, FL                | 0.217                | 98.09                     | 89.84                 |
| 12125              | Union, FL                 | 0.349                | 99.24                     | 83.82                 |
| 12127              | Volusia, FL               | -0.14                | 4.01                      | 53.47                 |
| 12129              | Wakulla, FL               | 0.124                | 94.27                     | 40.32                 |
| 12131              | Walton, FL                | -0.066               | 18.05                     | 58.22                 |
| 12133              | Washington, FL            | 0.089                | 90.13                     | 89.39                 |
| 13001              | Appling, GA               | -0.043               | 28.4                      | 96.69                 |
| 13003              | Atkinson, GA              | -0.158               | 2.93                      | 96.15                 |
| 13005              | Bacon, GA                 | -0.034               | 32.31                     | 93.89                 |
| 13007              | Baker, GA                 | 0.003                | 57.56                     | 74.24                 |
| 13009              | Baldwin, GA               | 0.014                | 64.5                      | 86.66                 |
| 13011              | Banks, GA                 | -0.013               | 45.37                     | 55.86                 |
| 13013              | Barrow, GA                | -0.085               | 12.19                     | 42.04                 |
| 13015              | Bartow, GA                | -0.054               | 23.14                     | 59.14                 |
| 13017              | Ben Hill, GA              | -0.126               | 5.06                      | 87.26                 |
| 13019              | Berrien, GA               | -0.001               | 54.76                     | 85                    |
| 13021              | Bibb, GA                  | -0.118               | 6.27                      | 91.75                 |
| 13023              | Bleckley, GA              | 0.073                | 86.92                     | 73.95                 |
| 13025              | Brantley, GA              | 0.013                | 63.52                     | 62.29                 |
| 13027              | Brooks, GA                | -0.004               | 52.44                     | 83.98                 |
| 13029              | Bryan, GA                 | -0.076               | 14.9                      | 33.89                 |
| 13031              | Bulloch, GA               | -0.003               | 53.39                     | 81.21                 |
| 13033              | Burke, GA                 | -0.041               | 29.16                     | 84.55                 |
| 13035              | Butts, GA                 | 0.07                 | 86.25                     | 76.53                 |
| 13037              | Calhoun, GA               | 0.168                | 96.53                     | 97.74                 |
| 13039              | Camden, GA                | 0.003                | 57.62                     | 51.59                 |
| 13043              | Candler, GA               | -0.042               | 28.56                     | 98.28                 |
| 13045              | Carroll, GA               | -0.059               | 21.08                     | 78.25                 |
| 13047              | Catoosa, GA               | -0.001               | 54.66                     | 13.18                 |
| 13049              | Charlton, GA              | 0.007                | 60.11                     | 87.52                 |
| 13051              | Chatham, GA               | -0.103               | 8.63                      | 69.49                 |
| 13053              | Chattahoochee, GA         | 0.439                | 99.55                     | 63.79                 |
| 13055              | Chattooga, GA             | 0.194                | 97.58                     | 92.52                 |
| 13057              | Cherokee, GA              | -0.043               | 28.27                     | 11.85                 |
| 13059              | Clarke, GA                | -0.091               | 11.02                     | 76.75                 |
| 13061              | Clay, GA                  | -0.05                | 24.77                     | 93.09                 |
| 13063              | Clayton, GA               | -0.235               | 0.6                       | 91.02                 |
| 13065              | Clinch, GA                | -0.007               | 50.17                     | 97.77                 |
| 13067              | Cobb, GA                  | -0.17                | 2.23                      | 26.69                 |
| 13069              | Coffee, GA                | -0.004               | 52.05                     | 95.06                 |
| 13071              | Colquitt, GA              | -0.116               | 6.5                       | 98.12                 |
| 13073              | Columbia, GA              | -0.066               | 17.96                     | 13.34                 |
| 13075              | Cook, GA                  | -0.05                | 24.64                     | 85.1                  |
| 13077              | Coweta, GA                | -0.079               | 14.01                     | 24.27                 |
| 13079              | Crawford, GA              | 0.05                 | 80.39                     | 68.15                 |
| 13081              | Crisp, GA                 | -0.047               | 25.91                     | 98.57                 |
| 13083              | Dade, GA                  | 0.129                | 94.62                     | 51.56                 |
| 13085              | Dawson, GA                | 0.023                | 69.5                      | 10.38                 |
| 13087              | Decatur, GA               | 0.068                | 85.93                     | 94.55                 |

| <b>County FIPS</b> | <b>County Description</b> | <b>DOS-SVI Index</b> | <b>DOS-SVI Percentile</b> | <b>SVI Percentile</b> |
|--------------------|---------------------------|----------------------|---------------------------|-----------------------|
| 13089              | DeKalb, GA                | -0.236               | 0.57                      | 66.11                 |
| 13091              | Dodge, GA                 | 0.043                | 77.94                     | 92.23                 |
| 13093              | Dooly, GA                 | 0.015                | 65.04                     | 94.84                 |
| 13095              | Dougherty, GA             | -0.104               | 8.56                      | 95.13                 |
| 13097              | Douglas, GA               | -0.164               | 2.61                      | 54.04                 |
| 13099              | Early, GA                 | 0.014                | 64.15                     | 92.01                 |
| 13101              | Echols, GA                | -0.098               | 9.68                      | 66.15                 |
| 13103              | Effingham, GA             | -0.013               | 46.04                     | 23.63                 |
| 13105              | Elbert, GA                | -0.06                | 20.73                     | 83.38                 |
| 13107              | Emanuel, GA               | -0.072               | 16.01                     | 97.68                 |
| 13109              | Evans, GA                 | -0.093               | 10.54                     | 98.47                 |
| 13111              | Fannin, GA                | -0.02                | 41.71                     | 30.03                 |
| 13113              | Fayette, GA               | -0.05                | 24.39                     | 6.08                  |
| 13115              | Floyd, GA                 | -0.033               | 32.86                     | 88.54                 |
| 13117              | Forsyth, GA               | -0.019               | 42.44                     | 3.73                  |
| 13119              | Franklin, GA              | -0.049               | 24.9                      | 84.62                 |
| 13121              | Fulton, GA                | -0.211               | 1.02                      | 52.68                 |
| 13123              | Gilmer, GA                | -0.051               | 24.13                     | 55.99                 |
| 13125              | Glascocock, GA            | 0.14                 | 95.32                     | 68.6                  |
| 13127              | Glynn, GA                 | -0.124               | 5.32                      | 71.59                 |
| 13129              | Gordon, GA                | -0.11                | 7.39                      | 88.06                 |
| 13131              | Grady, GA                 | -0.122               | 5.79                      | 92.58                 |
| 13133              | Greene, GA                | -0.148               | 3.63                      | 53.79                 |
| 13135              | Gwinnett, GA              | -0.188               | 1.62                      | 43.47                 |
| 13137              | Habersham, GA             | 0.014                | 64.85                     | 71.46                 |
| 13139              | Hall, GA                  | -0.076               | 14.84                     | 66.18                 |
| 13141              | Hancock, GA               | 0.196                | 97.61                     | 79.84                 |
| 13143              | Haralson, GA              | -0.064               | 18.85                     | 54.27                 |
| 13145              | Harris, GA                | 0.008                | 60.94                     | 13.41                 |
| 13147              | Hart, GA                  | -0.074               | 15.41                     | 71.94                 |
| 13149              | Heard, GA                 | 0.054                | 81.85                     | 72.32                 |
| 13151              | Henry, GA                 | -0.178               | 1.88                      | 31.37                 |
| 13153              | Houston, GA               | -0.041               | 28.97                     | 56.69                 |
| 13155              | Irwin, GA                 | -0.081               | 13.4                      | 84.08                 |
| 13157              | Jackson, GA               | -0.021               | 41.07                     | 35.16                 |
| 13159              | Jasper, GA                | 0.047                | 79.34                     | 69.27                 |
| 13161              | Jeff Davis, GA            | 0.027                | 70.77                     | 93.73                 |
| 13163              | Jefferson, GA             | 0.006                | 59.57                     | 94.39                 |
| 13165              | Jenkins, GA               | -0.068               | 17.35                     | 82.83                 |
| 13167              | Johnson, GA               | 0.104                | 92.2                      | 90.61                 |
| 13169              | Jones, GA                 | -0.02                | 42.15                     | 37.93                 |
| 13171              | Lamar, GA                 | 0.078                | 88.19                     | 49.17                 |
| 13173              | Lanier, GA                | -0.078               | 14.14                     | 86.97                 |
| 13175              | Laurens, GA               | -0.055               | 22.57                     | 80.13                 |
| 13177              | Lee, GA                   | 0.016                | 65.74                     | 35.19                 |
| 13179              | Liberty, GA               | -0.034               | 32.44                     | 88.82                 |
| 13181              | Lincoln, GA               | -0.073               | 15.76                     | 55.64                 |
| 13183              | Long, GA                  | -0.06                | 20.69                     | 82.71                 |
| 13185              | Lowndes, GA               | -0.043               | 27.95                     | 86.62                 |
| 13187              | Lumpkin, GA               | -0.032               | 33.3                      | 43.38                 |
| 13189              | McDuffie, GA              | -0.12                | 5.99                      | 93.76                 |
| 13191              | McIntosh, GA              | -0.118               | 6.18                      | 58.63                 |
| 13193              | Macon, GA                 | 0.091                | 90.45                     | 93.12                 |
| 13195              | Madison, GA               | 0.003                | 57.37                     | 64.17                 |
| 13197              | Marion, GA                | -0.083               | 12.73                     | 85.19                 |

| County FIPS | County Description | DOS-SVI Index | DOS-SVI Percentile | SVI Percentile |
|-------------|--------------------|---------------|--------------------|----------------|
| 13199       | Meriwether, GA     | -0.092        | 10.76              | 87.01          |
| 13201       | Miller, GA         | 0.16          | 96.28              | 77.99          |
| 13205       | Mitchell, GA       | 0.037         | 75.58              | 98.79          |
| 13207       | Monroe, GA         | 0.044         | 78.22              | 45.96          |
| 13209       | Montgomery, GA     | 0.067         | 85.8               | 84.65          |
| 13211       | Morgan, GA         | -0.034        | 32.57              | 24.46          |
| 13213       | Murray, GA         | -0.004        | 52.37              | 71.34          |
| 13215       | Muscogee, GA       | -0.13         | 4.68               | 90.03          |
| 13217       | Newton, GA         | -0.103        | 8.66               | 70.7           |
| 13219       | Oconee, GA         | 0.018         | 66.51              | 3.54           |
| 13221       | Oglethorpe, GA     | -0.063        | 19.48              | 52.17          |
| 13223       | Paulding, GA       | -0.036        | 31.14              | 13.76          |
| 13225       | Peach, GA          | -0.044        | 27.79              | 94.04          |
| 13227       | Pickens, GA        | 0.047         | 79.37              | 27.96          |
| 13229       | Pierce, GA         | -0.11         | 7.42               | 65.7           |
| 13231       | Pike, GA           | 0.067         | 85.7               | 15.1           |
| 13233       | Polk, GA           | -0.049        | 24.99              | 80.48          |
| 13235       | Pulaski, GA        | -0.068        | 17.45              | 84.59          |
| 13237       | Putnam, GA         | -0.089        | 11.49              | 42.8           |
| 13239       | Quitman, GA        | -0.075        | 15.38              | 94.33          |
| 13241       | Rabun, GA          | -0.027        | 36.77              | 53.41          |
| 13243       | Randolph, GA       | -0.024        | 38.65              | 97.39          |
| 13245       | Richmond, GA       | -0.101        | 9.04               | 93.28          |
| 13247       | Rockdale, GA       | -0.173        | 2.17               | 55.29          |
| 13249       | Schley, GA         | -0.016        | 44.06              | 82.48          |
| 13251       | Screven, GA        | 0.049         | 80.17              | 85.25          |
| 13253       | Seminole, GA       | 0.059         | 83                 | 83.44          |
| 13255       | Spalding, GA       | -0.082        | 12.96              | 86.91          |
| 13257       | Stephens, GA       | 0.07          | 86.22              | 79.68          |
| 13259       | Stewart, GA        | 0.117         | 93.57              | 92.45          |
| 13261       | Sumter, GA         | -0.052        | 23.75              | 97.64          |
| 13263       | Talbot, GA         | -0.038        | 30.66              | 85.89          |
| 13265       | Taliaferro, GA     | -0.12         | 5.95               | 90.89          |
| 13267       | Tattall, GA        | 0.223         | 98.12              | 90.8           |
| 13269       | Taylor, GA         | 0.012         | 62.97              | 91.97          |
| 13271       | Telfair, GA        | -0.032        | 33.37              | 83.69          |
| 13273       | Terrell, GA        | -0.079        | 13.85              | 95.7           |
| 13275       | Thomas, GA         | -0.06         | 20.54              | 91.08          |
| 13277       | Tift, GA           | -0.046        | 26.71              | 88.09          |
| 13279       | Toombs, GA         | 0.003         | 57.31              | 97.61          |
| 13281       | Towns, GA          | -0.005        | 51.38              | 32.58          |
| 13283       | Treutlen, GA       | 0.027         | 70.97              | 94.71          |
| 13285       | Troup, GA          | -0.112        | 6.94               | 90.13          |
| 13287       | Turner, GA         | -0.126        | 5.09               | 98.09          |
| 13289       | Twiggs, GA         | -0.153        | 3.09               | 75.8           |
| 13291       | Union, GA          | -0.05         | 24.48              | 31.15          |
| 13293       | Upson, GA          | -0.001        | 54.38              | 85.32          |
| 13295       | Walker, GA         | -0.016        | 44                 | 64.08          |
| 13297       | Walton, GA         | -0.047        | 26.01              | 29.3           |
| 13299       | Ware, GA           | -0.035        | 31.77              | 84.49          |
| 13301       | Warren, GA         | -0.104        | 8.53               | 89.46          |
| 13303       | Washington, GA     | 0.007         | 60.01              | 94.62          |
| 13305       | Wayne, GA          | 0.123         | 94.21              | 91.66          |
| 13307       | Webster, GA        | -0.221        | 0.86               | 78.76          |
| 13309       | Wheeler, GA        | 0.307         | 98.82              | 81.24          |

| <b>County FIPS</b> | <b>County Description</b> | <b>DOS-SVI Index</b> | <b>DOS-SVI Percentile</b> | <b>SVI Percentile</b> |
|--------------------|---------------------------|----------------------|---------------------------|-----------------------|
| 13311              | White, GA                 | -0.027               | 36.9                      | 23.57                 |
| 13313              | Whitfield, GA             | -0.056               | 22.38                     | 87.93                 |
| 13315              | Wilcox, GA                | 0.216                | 98.06                     | 81.69                 |
| 13317              | Wilkes, GA                | -0.145               | 3.82                      | 75.61                 |
| 13319              | Wilkinson, GA             | -0.003               | 52.95                     | 78.73                 |
| 13321              | Worth, GA                 | -0.151               | 3.47                      | 73.57                 |
| 15001              | Hawaii, HI                | 0.04                 | 76.92                     | 57.71                 |
| 15003              | Honolulu, HI              | 0.05                 | 80.64                     | 47.2                  |
| 15005              | Kalawao, HI               | 0.123                | 94.17                     | 31.62                 |
| 15007              | Kauai, HI                 | 0.075                | 87.39                     | 30.99                 |
| 15009              | Maui, HI                  | 0.117                | 93.6                      | 38.79                 |
| 16001              | Ada, ID                   | -0.02                | 41.93                     | 13.73                 |
| 16003              | Adams, ID                 | 0.05                 | 80.55                     | 29.36                 |
| 16005              | Bannock, ID               | 0.035                | 75.1                      | 57.9                  |
| 16007              | Bear Lake, ID             | 0.024                | 69.79                     | 21.43                 |
| 16009              | Benewah, ID               | 0.144                | 95.45                     | 73.34                 |
| 16011              | Bingham, ID               | 0.018                | 66.73                     | 50.7                  |
| 16013              | Blaine, ID                | -0.187               | 1.66                      | 32.39                 |
| 16015              | Boise, ID                 | 0.031                | 72.56                     | 6.72                  |
| 16017              | Bonner, ID                | -0.01                | 47.79                     | 24.01                 |
| 16019              | Bonneville, ID            | 0.031                | 73                        | 36.34                 |
| 16021              | Boundary, ID              | 0.06                 | 83.76                     | 30.83                 |
| 16023              | Butte, ID                 | 0.054                | 81.69                     | 24.62                 |
| 16025              | Camas, ID                 | -0.029               | 35.56                     | 13.38                 |
| 16027              | Canyon, ID                | 0.023                | 69.37                     | 73.66                 |
| 16029              | Caribou, ID               | 0.115                | 93.41                     | 19.17                 |
| 16031              | Cassia, ID                | -0.057               | 22.09                     | 67.32                 |
| 16033              | Clark, ID                 | 0.028                | 71.67                     | 89.11                 |
| 16035              | Clearwater, ID            | 0.113                | 93.16                     | 44.01                 |
| 16037              | Custer, ID                | -0.067               | 17.73                     | 43.69                 |
| 16039              | Elmore, ID                | -0.001               | 54.95                     | 58.82                 |
| 16041              | Franklin, ID              | 0.105                | 92.36                     | 14.14                 |
| 16043              | Fremont, ID               | 0.157                | 96.12                     | 51.37                 |
| 16045              | Gem, ID                   | -0.069               | 17.03                     | 66.27                 |
| 16047              | Gooding, ID               | -0.014               | 44.86                     | 70.76                 |
| 16049              | Idaho, ID                 | 0.133                | 94.81                     | 53.92                 |
| 16051              | Jefferson, ID             | 0.128                | 94.52                     | 25.25                 |
| 16053              | Jerome, ID                | -0.056               | 22.32                     | 67.36                 |
| 16055              | Kootenai, ID              | -0.028               | 36.04                     | 23.28                 |
| 16057              | Latah, ID                 | 0.048                | 79.69                     | 24.84                 |
| 16059              | Lemhi, ID                 | 0.104                | 92.04                     | 29.97                 |
| 16061              | Lewis, ID                 | 0.051                | 80.74                     | 56.78                 |
| 16063              | Lincoln, ID               | 0.034                | 74.37                     | 55.76                 |
| 16065              | Madison, ID               | 0.125                | 94.3                      | 40.29                 |
| 16067              | Minidoka, ID              | -0.165               | 2.52                      | 67.83                 |
| 16069              | Nez Perce, ID             | -0.004               | 51.64                     | 50.67                 |
| 16071              | Oneida, ID                | 0.077                | 87.93                     | 34.24                 |
| 16073              | Owyhee, ID                | -0.016               | 44.28                     | 82.45                 |
| 16075              | Payette, ID               | 0.096                | 91.15                     | 60.1                  |
| 16077              | Power, ID                 | 0.037                | 75.87                     | 51.62                 |
| 16079              | Shoshone, ID              | 0.018                | 66.76                     | 75.7                  |
| 16081              | Teton, ID                 | 0.053                | 81.53                     | 13.44                 |
| 16083              | Twin Falls, ID            | -0.016               | 44.09                     | 49.55                 |
| 16085              | Valley, ID                | 0.013                | 63.83                     | 8.82                  |
| 16087              | Washington, ID            | -0.101               | 9.01                      | 85.06                 |

| <b>County FIPS</b> | <b>County Description</b> | <b>DOS-SVI Index</b> | <b>DOS-SVI Percentile</b> | <b>SVI Percentile</b> |
|--------------------|---------------------------|----------------------|---------------------------|-----------------------|
| 17001              | Adams, IL                 | -0.001               | 54.22                     | 24.9                  |
| 17003              | Alexander, IL             | -0.198               | 1.34                      | 95.73                 |
| 17005              | Bond, IL                  | 0.199                | 97.71                     | 37.32                 |
| 17007              | Boone, IL                 | -0.042               | 28.43                     | 46.97                 |
| 17009              | Brown, IL                 | 0.331                | 99.11                     | 47.45                 |
| 17011              | Bureau, IL                | -0.059               | 21.23                     | 28.63                 |
| 17013              | Calhoun, IL               | 0.075                | 87.33                     | 19.01                 |
| 17015              | Carroll, IL               | -0.011               | 47.05                     | 16.82                 |
| 17017              | Cass, IL                  | -0.08                | 13.66                     | 69.71                 |
| 17019              | Champaign, IL             | 0.079                | 88.54                     | 49.9                  |
| 17021              | Christian, IL             | -0.007               | 49.79                     | 24.08                 |
| 17023              | Clark, IL                 | -0.013               | 45.49                     | 20.73                 |
| 17025              | Clay, IL                  | 0.008                | 60.71                     | 61.15                 |
| 17027              | Clinton, IL               | 0.066                | 85.36                     | 17.87                 |
| 17029              | Coles, IL                 | -0.031               | 34.03                     | 49.78                 |
| 17031              | Cook, IL                  | -0.108               | 7.77                      | 67.55                 |
| 17033              | Crawford, IL              | 0.095                | 90.99                     | 38.38                 |
| 17035              | Cumberland, IL            | 0.015                | 64.95                     | 16.27                 |
| 17037              | DeKalb, IL                | -0.046               | 26.3                      | 48.66                 |
| 17039              | De Witt, IL               | 0.007                | 60.05                     | 12.9                  |
| 17041              | Douglas, IL               | 0.067                | 85.74                     | 44.39                 |
| 17043              | DuPage, IL                | -0.088               | 11.68                     | 16.11                 |
| 17045              | Edgar, IL                 | -0.038               | 30.21                     | 34.33                 |
| 17047              | Edwards, IL               | 0.045                | 78.61                     | 24.43                 |
| 17049              | Effingham, IL             | 0.028                | 71.19                     | 19.9                  |
| 17051              | Fayette, IL               | 0.045                | 78.7                      | 59.49                 |
| 17053              | Ford, IL                  | -0.047               | 26.17                     | 30.51                 |
| 17055              | Franklin, IL              | -0.014               | 45.15                     | 60.92                 |
| 17057              | Fulton, IL                | -0.001               | 54.19                     | 57.61                 |
| 17059              | Gallatin, IL              | -0.105               | 8.28                      | 45.38                 |
| 17061              | Greene, IL                | -0.006               | 50.97                     | 19.52                 |
| 17063              | Grundy, IL                | -0.003               | 53.17                     | 8.44                  |
| 17065              | Hamilton, IL              | -0.01                | 47.98                     | 15.29                 |
| 17067              | Hancock, IL               | 0.031                | 73.03                     | 12.32                 |
| 17069              | Hardin, IL                | 0.087                | 89.72                     | 50.19                 |
| 17071              | Henderson, IL             | -0.006               | 50.72                     | 6.69                  |
| 17073              | Henry, IL                 | -0.035               | 31.74                     | 20.1                  |
| 17075              | Iroquois, IL              | -0.01                | 47.88                     | 34.04                 |
| 17077              | Jackson, IL               | -0.015               | 44.35                     | 70.45                 |
| 17079              | Jasper, IL                | 0.034                | 74.4                      | 24.17                 |
| 17081              | Jefferson, IL             | 0                    | 55.43                     | 81.08                 |
| 17083              | Jersey, IL                | 0.06                 | 83.73                     | 10.41                 |
| 17085              | Jo Daviess, IL            | 0.006                | 59.69                     | 5.25                  |
| 17087              | Johnson, IL               | 0.174                | 96.85                     | 46.24                 |
| 17089              | Kane, IL                  | -0.08                | 13.5                      | 41.69                 |
| 17091              | Kankakee, IL              | -0.012               | 46.58                     | 66.56                 |
| 17093              | Kendall, IL               | -0.035               | 31.87                     | 13.98                 |
| 17095              | Knox, IL                  | 0.036                | 75.17                     | 64.62                 |
| 17097              | Lake, IL                  | -0.07                | 16.49                     | 35.13                 |
| 17099              | LaSalle, IL               | -0.024               | 39.16                     | 43.03                 |
| 17101              | Lawrence, IL              | 0.147                | 95.61                     | 77.83                 |
| 17103              | Lee, IL                   | 0.073                | 86.88                     | 30.1                  |
| 17105              | Livingston, IL            | 0.014                | 64.37                     | 48.41                 |
| 17107              | Logan, IL                 | 0.137                | 95.13                     | 22.71                 |
| 17109              | McDonough, IL             | 0.088                | 89.91                     | 51.66                 |



| County FIPS | County Description | DOS-SVI Index | DOS-SVI Percentile | SVI Percentile |
|-------------|--------------------|---------------|--------------------|----------------|
| 17111       | McHenry, IL        | -0.018        | 42.79              | 7.01           |
| 17113       | McLean, IL         | -0.039        | 30.05              | 19.04          |
| 17115       | Macon, IL          | -0.045        | 27.32              | 59.71          |
| 17117       | Macoupin, IL       | 0.012         | 63.23              | 19.87          |
| 17119       | Madison, IL        | 0.001         | 56.22              | 29.65          |
| 17121       | Marion, IL         | 0.001         | 56.16              | 73.85          |
| 17123       | Marshall, IL       | 0.016         | 65.78              | 5.45           |
| 17125       | Mason, IL          | -0.023        | 39.51              | 29.46          |
| 17127       | Massac, IL         | 0.018         | 66.6               | 75.13          |
| 17129       | Menard, IL         | 0.001         | 56.54              | 4.84           |
| 17131       | Mercer, IL         | -0.014        | 45.08              | 11.34          |
| 17133       | Monroe, IL         | 0.033         | 74.02              | 0.16           |
| 17135       | Montgomery, IL     | 0.113         | 93.09              | 39.14          |
| 17137       | Morgan, IL         | 0.035         | 74.59              | 50.45          |
| 17139       | Moultrie, IL       | 0.159         | 96.21              | 29.49          |
| 17141       | Ogle, IL           | -0.012        | 46.07              | 29.17          |
| 17143       | Peoria, IL         | -0.094        | 10.41              | 61.31          |
| 17145       | Perry, IL          | 0.056         | 82.52              | 64.87          |
| 17147       | Piatt, IL          | -0.007        | 50.21              | 0.32           |
| 17149       | Pike, IL           | 0.021         | 68.35              | 34.94          |
| 17151       | Pope, IL           | 0.115         | 93.35              | 45.45          |
| 17153       | Pulaski, IL        | -0.004        | 52.5               | 69.43          |
| 17155       | Putnam, IL         | -0.039        | 29.96              | 2.77           |
| 17157       | Randolph, IL       | 0.079         | 88.6               | 45.67          |
| 17159       | Richland, IL       | -0.035        | 31.71              | 41.05          |
| 17161       | Rock Island, IL    | -0.092        | 10.86              | 71.37          |
| 17163       | St. Clair, IL      | -0.064        | 19.04              | 52.29          |
| 17165       | Saline, IL         | -0.031        | 33.97              | 86.37          |
| 17167       | Sangamon, IL       | -0.043        | 28.34              | 43.57          |
| 17169       | Schuyler, IL       | -0.008        | 49                 | 57.07          |
| 17171       | Scott, IL          | 0.059         | 83.13              | 13.54          |
| 17173       | Shelby, IL         | 0.043         | 78                 | 8.5            |
| 17175       | Stark, IL          | -0.038        | 30.5               | 6.34           |
| 17177       | Stephenson, IL     | -0.091        | 10.98              | 50             |
| 17179       | Tazewell, IL       | 0.008         | 60.68              | 10.7           |
| 17181       | Union, IL          | 0.027         | 70.87              | 68.44          |
| 17183       | Vermilion, IL      | -0.03         | 34.83              | 81.31          |
| 17185       | Wabash, IL         | -0.007        | 49.89              | 32.07          |
| 17187       | Warren, IL         | 0.104         | 92.07              | 60.73          |
| 17189       | Washington, IL     | 0.06          | 83.64              | 6.53           |
| 17191       | Wayne, IL          | 0.024         | 69.6               | 43.31          |
| 17193       | White, IL          | 0.038         | 76.31              | 53.82          |
| 17195       | Whiteside, IL      | -0.038        | 30.59              | 32.83          |
| 17197       | Will, IL           | -0.045        | 27.51              | 20.22          |
| 17199       | Williamson, IL     | -0.005        | 51.23              | 48.06          |
| 17201       | Winnebago, IL      | -0.078        | 14.26              | 72.04          |
| 17203       | Woodford, IL       | 0.064         | 84.88              | 1.88           |
| 18001       | Adams, IN          | 0.161         | 96.34              | 59.04          |
| 18003       | Allen, IN          | -0.11         | 7.45               | 52.36          |
| 18005       | Bartholomew, IN    | -0.02         | 41.42              | 36.31          |
| 18007       | Benton, IN         | -0.045        | 26.74              | 33.47          |
| 18009       | Blackford, IN      | 0.019         | 67.21              | 37.1           |
| 18011       | Boone, IN          | -0.015        | 44.63              | 4.49           |
| 18013       | Brown, IN          | 0.001         | 56.35              | 6.02           |
| 18015       | Carroll, IN        | 0.026         | 70.42              | 11.75          |

| <b>County FIPS</b> | <b>County Description</b> | <b>DOS-SVI Index</b> | <b>DOS-SVI Percentile</b> | <b>SVI Percentile</b> |
|--------------------|---------------------------|----------------------|---------------------------|-----------------------|
| 18017              | Cass, IN                  | -0.064               | 19.36                     | 71.97                 |
| 18019              | Clark, IN                 | -0.057               | 22.13                     | 25.48                 |
| 18021              | Clay, IN                  | 0.002                | 56.73                     | 33.38                 |
| 18023              | Clinton, IN               | -0.034               | 32.19                     | 57.1                  |
| 18025              | Crawford, IN              | 0.01                 | 62.05                     | 38.89                 |
| 18027              | Daviess, IN               | 0.117                | 93.66                     | 68.82                 |
| 18029              | Dearborn, IN              | -0.017               | 43.74                     | 7.99                  |
| 18031              | Decatur, IN               | -0.03                | 34.86                     | 21.02                 |
| 18033              | DeKalb, IN                | -0.06                | 20.6                      | 23.34                 |
| 18035              | Delaware, IN              | -0.013               | 45.78                     | 56.66                 |
| 18037              | Dubois, IN                | 0.017                | 66.22                     | 20.8                  |
| 18039              | Elkhart, IN               | -0.08                | 13.56                     | 77.01                 |
| 18041              | Fayette, IN               | -0.04                | 29.42                     | 61.08                 |
| 18043              | Floyd, IN                 | -0.065               | 18.75                     | 16.69                 |
| 18045              | Fountain, IN              | 0.02                 | 67.46                     | 20.32                 |
| 18047              | Franklin, IN              | -0.012               | 46.39                     | 14.71                 |
| 18049              | Fulton, IN                | -0.007               | 50.24                     | 34.59                 |
| 18051              | Gibson, IN                | 0.041                | 77.4                      | 31.5                  |
| 18053              | Grant, IN                 | -0.037               | 31.01                     | 73.31                 |
| 18055              | Greene, IN                | 0.08                 | 88.67                     | 44.43                 |
| 18057              | Hamilton, IN              | -0.048               | 25.6                      | 2.55                  |
| 18059              | Hancock, IN               | -0.026               | 37.22                     | 1.69                  |
| 18061              | Harrison, IN              | 0.022                | 68.55                     | 18.66                 |
| 18063              | Hendricks, IN             | -0.033               | 32.92                     | 8.15                  |
| 18065              | Henry, IN                 | 0.015                | 65.11                     | 37.93                 |
| 18067              | Howard, IN                | -0.1                 | 9.07                      | 48.15                 |
| 18069              | Huntington, IN            | 0.045                | 78.64                     | 12.48                 |
| 18071              | Jackson, IN               | -0.054               | 23.05                     | 53.89                 |
| 18073              | Jasper, IN                | 0.013                | 64.02                     | 26.85                 |
| 18075              | Jay, IN                   | 0.058                | 82.84                     | 67.48                 |
| 18077              | Jefferson, IN             | 0.037                | 75.68                     | 44.14                 |
| 18079              | Jennings, IN              | 0.033                | 73.67                     | 38.47                 |
| 18081              | Johnson, IN               | -0.04                | 29.58                     | 14.24                 |
| 18083              | Knox, IN                  | -0.016               | 44.32                     | 59.27                 |
| 18085              | Kosciusko, IN             | 0.004                | 58.07                     | 46.08                 |
| 18087              | LaGrange, IN              | 0.241                | 98.22                     | 37.07                 |
| 18089              | Lake, IN                  | -0.098               | 9.74                      | 72.52                 |
| 18091              | LaPorte, IN               | 0.062                | 84.14                     | 72.17                 |
| 18093              | Lawrence, IN              | -0.018               | 42.88                     | 27.52                 |
| 18095              | Madison, IN               | -0.036               | 31.26                     | 67.13                 |
| 18097              | Marion, IN                | -0.164               | 2.58                      | 79.71                 |
| 18099              | Marshall, IN              | 0.083                | 89.11                     | 57.96                 |
| 18101              | Martin, IN                | -0.006               | 50.84                     | 23.98                 |
| 18103              | Miami, IN                 | 0.037                | 75.84                     | 58.79                 |
| 18105              | Monroe, IN                | -0.004               | 51.99                     | 45.19                 |
| 18107              | Montgomery, IN            | -0.015               | 44.57                     | 36.85                 |
| 18109              | Morgan, IN                | 0.017                | 66.25                     | 21.56                 |
| 18111              | Newton, IN                | -0.058               | 21.75                     | 33.66                 |
| 18113              | Noble, IN                 | 0.007                | 60.08                     | 47.42                 |
| 18115              | Ohio, IN                  | -0.033               | 32.6                      | 2.52                  |
| 18117              | Orange, IN                | -0.025               | 37.89                     | 64.55                 |
| 18119              | Owen, IN                  | 0.03                 | 72.27                     | 34.55                 |
| 18121              | Parke, IN                 | 0.191                | 97.48                     | 58.09                 |
| 18123              | Perry, IN                 | 0.019                | 67.4                      | 31.02                 |
| 18125              | Pike, IN                  | 0.009                | 61.67                     | 17.45                 |

| <b>County FIPS</b> | <b>County Description</b> | <b>DOS-SVI Index</b> | <b>DOS-SVI Percentile</b> | <b>SVI Percentile</b> |
|--------------------|---------------------------|----------------------|---------------------------|-----------------------|
| 18127              | Porter, IN                | -0.025               | 38.43                     | 14.78                 |
| 18129              | Posey, IN                 | 0.021                | 68.1                      | 1.05                  |
| 18131              | Pulaski, IN               | 0.005                | 58.8                      | 23.09                 |
| 18133              | Putnam, IN                | 0.167                | 96.5                      | 34.84                 |
| 18135              | Randolph, IN              | -0.07                | 16.91                     | 42.96                 |
| 18137              | Ripley, IN                | 0.064                | 84.91                     | 37.74                 |
| 18139              | Rush, IN                  | -0.061               | 20.06                     | 25.67                 |
| 18141              | St. Joseph, IN            | -0.063               | 19.68                     | 62.23                 |
| 18143              | Scott, IN                 | -0.011               | 46.8                      | 42.01                 |
| 18145              | Shelby, IN                | -0.023               | 39.7                      | 21.82                 |
| 18147              | Spencer, IN               | 0.028                | 71.54                     | 8.79                  |
| 18149              | Starke, IN                | 0.017                | 66.44                     | 34.17                 |
| 18151              | Steuben, IN               | -0.005               | 51.42                     | 27.1                  |
| 18153              | Sullivan, IN              | 0.081                | 88.79                     | 64.01                 |
| 18155              | Switzerland, IN           | 0.048                | 79.75                     | 62.71                 |
| 18157              | Tippecanoe, IN            | -0.032               | 33.46                     | 49.3                  |
| 18159              | Tipton, IN                | -0.002               | 53.84                     | 7.26                  |
| 18161              | Union, IN                 | 0                    | 55.46                     | 17.13                 |
| 18163              | Vanderburgh, IN           | -0.068               | 17.51                     | 52.42                 |
| 18165              | Vermillion, IN            | -0.007               | 50.14                     | 45.03                 |
| 18167              | Vigo, IN                  | 0.035                | 74.88                     | 72.74                 |
| 18169              | Wabash, IN                | 0.031                | 72.75                     | 28.82                 |
| 18171              | Warren, IN                | -0.014               | 45.05                     | 7.8                   |
| 18173              | Warrick, IN               | 0.009                | 61.54                     | 6.78                  |
| 18175              | Washington, IN            | 0.004                | 58.01                     | 37.77                 |
| 18177              | Wayne, IN                 | -0.054               | 22.86                     | 71.05                 |
| 18179              | Wells, IN                 | -0.03                | 35.05                     | 14.39                 |
| 18181              | White, IN                 | -0.011               | 47.21                     | 24.39                 |
| 18183              | Whitley, IN               | -0.039               | 29.67                     | 3.15                  |
| 19001              | Adair, IA                 | -0.011               | 46.7                      | 5.38                  |
| 19003              | Adams, IA                 | 0.048                | 79.59                     | 3.76                  |
| 19005              | Allamakee, IA             | 0.03                 | 72.21                     | 32.2                  |
| 19007              | Appanoose, IA             | 0.049                | 79.91                     | 37.83                 |
| 19009              | Audubon, IA               | -0.02                | 42.06                     | 2.26                  |
| 19011              | Benton, IA                | 0.018                | 66.57                     | 1.18                  |
| 19013              | Black Hawk, IA            | -0.071               | 16.43                     | 42.64                 |
| 19015              | Boone, IA                 | 0.012                | 63.16                     | 11.78                 |
| 19017              | Bremer, IA                | 0.045                | 78.73                     | 3.22                  |
| 19019              | Buchanan, IA              | 0.026                | 70.33                     | 6.62                  |
| 19021              | Buena Vista, IA           | -0.011               | 47.28                     | 74.08                 |
| 19023              | Butler, IA                | 0.013                | 63.9                      | 2.36                  |
| 19025              | Calhoun, IA               | 0.051                | 80.9                      | 15.8                  |
| 19027              | Carroll, IA               | -0.027               | 36.45                     | 4.55                  |
| 19029              | Cass, IA                  | -0.057               | 21.97                     | 19.81                 |
| 19031              | Cedar, IA                 | 0.038                | 76                        | 0.8                   |
| 19033              | Cerro Gordo, IA           | -0.041               | 28.94                     | 24.97                 |
| 19035              | Cherokee, IA              | -0.052               | 23.72                     | 17.01                 |
| 19037              | Chickasaw, IA             | -0.001               | 54.89                     | 5.99                  |
| 19039              | Clarke, IA                | 0.031                | 72.97                     | 48.47                 |
| 19041              | Clay, IA                  | -0.026               | 37.44                     | 34.39                 |
| 19043              | Clayton, IA               | 0.023                | 69.18                     | 18.41                 |
| 19045              | Clinton, IA               | -0.069               | 16.97                     | 26.46                 |
| 19047              | Crawford, IA              | -0.049               | 25.09                     | 85.51                 |
| 19049              | Dallas, IA                | -0.027               | 37.03                     | 5.96                  |
| 19051              | Davis, IA                 | 0.345                | 99.2                      | 35.03                 |

| <b>County FIPS</b> | <b>County Description</b> | <b>DOS-SVI Index</b> | <b>DOS-SVI Percentile</b> | <b>SVI Percentile</b> |
|--------------------|---------------------------|----------------------|---------------------------|-----------------------|
| 19053              | Decatur, IA               | 0.134                | 94.91                     | 68.22                 |
| 19055              | Delaware, IA              | 0.029                | 71.98                     | 3.44                  |
| 19057              | Des Moines, IA            | -0.095               | 10.22                     | 46.53                 |
| 19059              | Dickinson, IA             | -0.075               | 15.15                     | 9.17                  |
| 19061              | Dubuque, IA               | 0.003                | 57.27                     | 23.47                 |
| 19063              | Emmet, IA                 | 0.084                | 89.17                     | 39.46                 |
| 19065              | Fayette, IA               | -0.039               | 30.12                     | 22.52                 |
| 19067              | Floyd, IA                 | -0.013               | 45.62                     | 35.96                 |
| 19069              | Franklin, IA              | -0.064               | 19.26                     | 19.62                 |
| 19071              | Fremont, IA               | 0.056                | 82.62                     | 5.54                  |
| 19073              | Greene, IA                | 0.043                | 77.97                     | 19.78                 |
| 19075              | Grundy, IA                | 0.021                | 68.23                     | 0.38                  |
| 19077              | Guthrie, IA               | -0.022               | 40.15                     | 12.2                  |
| 19079              | Hamilton, IA              | -0.01                | 48.04                     | 11.53                 |
| 19081              | Hancock, IA               | 0.004                | 58.45                     | 7.13                  |
| 19083              | Hardin, IA                | 0.066                | 85.58                     | 12.42                 |
| 19085              | Harrison, IA              | -0.012               | 46.35                     | 6.46                  |
| 19087              | Henry, IA                 | -0.011               | 47.37                     | 31.34                 |
| 19089              | Howard, IA                | -0.004               | 52.31                     | 15.67                 |
| 19091              | Humboldt, IA              | -0.03                | 34.7                      | 14.46                 |
| 19093              | Ida, IA                   | 0.02                 | 67.84                     | 8.66                  |
| 19095              | Iowa, IA                  | 0.02                 | 67.94                     | 3.47                  |
| 19097              | Jackson, IA               | -0.017               | 43.78                     | 12.68                 |
| 19099              | Jasper, IA                | 0.036                | 75.42                     | 25.48                 |
| 19101              | Jefferson, IA             | 0.015                | 65.17                     | 48.95                 |
| 19103              | Johnson, IA               | -0.047               | 25.88                     | 26.75                 |
| 19105              | Jones, IA                 | 0.09                 | 90.29                     | 19.24                 |
| 19107              | Keokuk, IA                | 0.006                | 59.66                     | 3.98                  |
| 19109              | Kossuth, IA               | -0.038               | 30.31                     | 10.48                 |
| 19111              | Lee, IA                   | -0.024               | 39.06                     | 50.41                 |
| 19113              | Linn, IA                  | -0.055               | 22.73                     | 18.06                 |
| 19115              | Louisa, IA                | -0.009               | 48.46                     | 45.7                  |
| 19117              | Lucas, IA                 | -0.042               | 28.53                     | 27.55                 |
| 19119              | Lyon, IA                  | 0.005                | 58.9                      | 4.39                  |
| 19121              | Madison, IA               | 0.029                | 71.76                     | 2.04                  |
| 19123              | Mahaska, IA               | 0.025                | 69.91                     | 46.37                 |
| 19125              | Marion, IA                | 0.045                | 78.57                     | 19.49                 |
| 19127              | Marshall, IA              | -0.053               | 23.21                     | 68.63                 |
| 19129              | Mills, IA                 | 0.038                | 76.06                     | 10.76                 |
| 19131              | Mitchell, IA              | 0.012                | 63.39                     | 8.6                   |
| 19133              | Monona, IA                | -0.053               | 23.5                      | 17.96                 |
| 19135              | Monroe, IA                | 0.055                | 82.08                     | 25.19                 |
| 19137              | Montgomery, IA            | -0.027               | 36.84                     | 52.8                  |
| 19139              | Muscatine, IA             | -0.09                | 11.11                     | 39.04                 |
| 19141              | O'Brien, IA               | 0.057                | 82.65                     | 23.22                 |
| 19143              | Osceola, IA               | 0.017                | 66.12                     | 26.34                 |
| 19145              | Page, IA                  | -0.004               | 51.77                     | 33.41                 |
| 19147              | Palo Alto, IA             | 0.024                | 69.75                     | 17.29                 |
| 19149              | Plymouth, IA              | -0.043               | 28.02                     | 12.71                 |
| 19151              | Pocahontas, IA            | -0.001               | 54.54                     | 14.62                 |
| 19153              | Polk, IA                  | -0.103               | 8.69                      | 37.68                 |
| 19155              | Pottawattamie, IA         | -0.047               | 25.98                     | 45.99                 |
| 19157              | Poweshiek, IA             | 0.052                | 81.03                     | 15.48                 |
| 19159              | Ringgold, IA              | 0.039                | 76.54                     | 12.99                 |
| 19161              | Sac, IA                   | -0.05                | 24.36                     | 7.48                  |

| <b>County FIPS</b> | <b>County Description</b> | <b>DOS-SVI Index</b> | <b>DOS-SVI Percentile</b> | <b>SVI Percentile</b> |
|--------------------|---------------------------|----------------------|---------------------------|-----------------------|
| 19163              | Scott, IA                 | -0.074               | 15.51                     | 26.59                 |
| 19165              | Shelby, IA                | -0.004               | 52.59                     | 13.03                 |
| 19167              | Sioux, IA                 | 0.132                | 94.78                     | 22.07                 |
| 19169              | Story, IA                 | -0.019               | 42.57                     | 21.24                 |
| 19171              | Tama, IA                  | 0.01                 | 61.92                     | 32.74                 |
| 19173              | Taylor, IA                | -0.015               | 44.44                     | 27.71                 |
| 19175              | Union, IA                 | -0.046               | 26.49                     | 44.55                 |
| 19177              | Van Buren, IA             | 0.11                 | 92.71                     | 24.65                 |
| 19179              | Wapello, IA               | -0.029               | 35.37                     | 74.39                 |
| 19181              | Warren, IA                | 0                    | 55.49                     | 7.2                   |
| 19183              | Washington, IA            | -0.028               | 36.01                     | 22.39                 |
| 19185              | Wayne, IA                 | 0.15                 | 95.77                     | 45.83                 |
| 19187              | Webster, IA               | -0.008               | 49.44                     | 45.8                  |
| 19189              | Winnebago, IA             | 0.023                | 69.21                     | 20.61                 |
| 19191              | Winneshiek, IA            | 0.115                | 93.31                     | 1.15                  |
| 19193              | Woodbury, IA              | -0.096               | 10                        | 69.68                 |
| 19195              | Worth, IA                 | -0.036               | 31.33                     | 6.97                  |
| 19197              | Wright, IA                | -0.048               | 25.66                     | 48.03                 |
| 20001              | Allen, KS                 | 0.008                | 60.43                     | 39.78                 |
| 20003              | Anderson, KS              | 0.045                | 78.86                     | 22.74                 |
| 20005              | Atchison, KS              | 0.101                | 91.94                     | 49.11                 |
| 20007              | Barber, KS                | -0.023               | 39.6                      | 28.03                 |
| 20009              | Barton, KS                | -0.082               | 13.02                     | 54.39                 |
| 20011              | Bourbon, KS               | 0.083                | 89.08                     | 58.28                 |
| 20013              | Brown, KS                 | -0.01                | 47.76                     | 27.17                 |
| 20015              | Butler, KS                | 0.077                | 87.84                     | 26.24                 |
| 20017              | Chase, KS                 | 0.093                | 90.61                     | 40.67                 |
| 20019              | Chautauqua, KS            | 0.028                | 71.47                     | 71.88                 |
| 20021              | Cherokee, KS              | 0.008                | 60.4                      | 38.28                 |
| 20023              | Cheyenne, KS              | -0.058               | 21.87                     | 10.03                 |
| 20025              | Clark, KS                 | -0.008               | 49.35                     | 31.24                 |
| 20027              | Clay, KS                  | -0.035               | 31.93                     | 4.94                  |
| 20029              | Cloud, KS                 | -0.054               | 22.99                     | 27.39                 |
| 20031              | Coffey, KS                | -0.006               | 51.03                     | 20.35                 |
| 20033              | Comanche, KS              | 0.022                | 68.77                     | 7.93                  |
| 20035              | Cowley, KS                | 0.004                | 58.13                     | 73.18                 |
| 20037              | Crawford, KS              | 0.088                | 90.03                     | 69.87                 |
| 20039              | Decatur, KS               | -0.072               | 15.98                     | 15.73                 |
| 20041              | Dickinson, KS             | 0.032                | 73.29                     | 33.22                 |
| 20043              | Doniphan, KS              | 0.097                | 91.28                     | 23.06                 |
| 20045              | Douglas, KS               | -0.005               | 51.29                     | 22.32                 |
| 20047              | Edwards, KS               | -0.088               | 11.65                     | 37.2                  |
| 20049              | Elk, KS                   | 0.023                | 69.28                     | 38.95                 |
| 20051              | Ellis, KS                 | -0.006               | 50.65                     | 15.64                 |
| 20053              | Ellsworth, KS             | 0.17                 | 96.66                     | 39.52                 |
| 20055              | Finney, KS                | -0.074               | 15.7                      | 82.36                 |
| 20057              | Ford, KS                  | -0.097               | 9.84                      | 85.7                  |
| 20059              | Franklin, KS              | 0.03                 | 72.24                     | 21.37                 |
| 20061              | Geary, KS                 | -0.01                | 47.66                     | 65.76                 |
| 20063              | Gove, KS                  | -0.037               | 31.04                     | 9.75                  |
| 20065              | Graham, KS                | -0.05                | 24.51                     | 12.55                 |
| 20067              | Grant, KS                 | -0.036               | 31.2                      | 38.15                 |
| 20069              | Gray, KS                  | 0.005                | 58.71                     | 27.36                 |
| 20071              | Greeley, KS               | -0.001               | 54.85                     | 57.52                 |
| 20073              | Greenwood, KS             | 0.021                | 68.19                     | 21.27                 |

| <b>County FIPS</b> | <b>County Description</b> | <b>DOS-SVI Index</b> | <b>DOS-SVI Percentile</b> | <b>SVI Percentile</b> |
|--------------------|---------------------------|----------------------|---------------------------|-----------------------|
| 20075              | Hamilton, KS              | -0.17                | 2.26                      | 25.86                 |
| 20077              | Harper, KS                | -0.041               | 29                        | 32.23                 |
| 20079              | Harvey, KS                | -0.001               | 54.35                     | 33.5                  |
| 20081              | Haskell, KS               | 0.069                | 86.09                     | 41.15                 |
| 20083              | Hodgeman, KS              | 0.063                | 84.62                     | 11.18                 |
| 20085              | Jackson, KS               | -0.008               | 49.06                     | 26.94                 |
| 20087              | Jefferson, KS             | 0.012                | 63.1                      | 5.48                  |
| 20089              | Jewell, KS                | -0.011               | 47.44                     | 8.76                  |
| 20091              | Johnson, KS               | -0.066               | 18.21                     | 6.15                  |
| 20093              | Kearny, KS                | -0.128               | 4.84                      | 46.56                 |
| 20095              | Kingman, KS               | 0.004                | 58.39                     | 5.13                  |
| 20097              | Kiowa, KS                 | 0.095                | 91.05                     | 25.8                  |
| 20099              | Labette, KS               | 0.004                | 57.94                     | 63.92                 |
| 20101              | Lane, KS                  | 0.012                | 63.48                     | 3.03                  |
| 20103              | Leavenworth, KS           | 0.051                | 80.93                     | 24.04                 |
| 20105              | Lincoln, KS               | 0.052                | 81.38                     | 13.22                 |
| 20107              | Linn, KS                  | 0.014                | 64.66                     | 44.78                 |
| 20109              | Logan, KS                 | 0.026                | 70.49                     | 12.96                 |
| 20111              | Lyon, KS                  | -0.022               | 40.21                     | 73.22                 |
| 20113              | McPherson, KS             | -0.009               | 48.65                     | 10.67                 |
| 20115              | Marion, KS                | 0.1                  | 91.85                     | 17.71                 |
| 20117              | Marshall, KS              | 0.048                | 79.81                     | 12.64                 |
| 20119              | Meade, KS                 | -0.095               | 10.19                     | 37.17                 |
| 20121              | Miami, KS                 | 0.032                | 73.16                     | 2.58                  |
| 20123              | Mitchell, KS              | 0.072                | 86.66                     | 28.44                 |
| 20125              | Montgomery, KS            | -0.047               | 26.2                      | 80.29                 |
| 20127              | Morris, KS                | -0.044               | 27.76                     | 24.36                 |
| 20129              | Morton, KS                | -0.104               | 8.6                       | 40.8                  |
| 20131              | Nemaha, KS                | 0.032                | 73.1                      | 9.62                  |
| 20133              | Neosho, KS                | -0.018               | 43.36                     | 65.8                  |
| 20135              | Ness, KS                  | -0.057               | 21.9                      | 15                    |
| 20137              | Norton, KS                | 0.113                | 93.06                     | 29.75                 |
| 20139              | Osage, KS                 | -0.015               | 44.67                     | 23.41                 |
| 20141              | Osborne, KS               | -0.032               | 33.33                     | 7.23                  |
| 20143              | Ottawa, KS                | 0.02                 | 67.59                     | 2.71                  |
| 20145              | Pawnee, KS                | 0.07                 | 86.31                     | 28.66                 |
| 20147              | Phillips, KS              | 0.046                | 79.02                     | 24.2                  |
| 20149              | Pottawatomie, KS          | 0.079                | 88.63                     | 14.87                 |
| 20151              | Pratt, KS                 | 0.121                | 93.98                     | 38.73                 |
| 20153              | Rawlins, KS               | 0.005                | 58.61                     | 13.6                  |
| 20155              | Reno, KS                  | 0.041                | 77.36                     | 58.66                 |
| 20157              | Republic, KS              | 0.035                | 74.44                     | 6.05                  |
| 20159              | Rice, KS                  | 0.049                | 80.13                     | 42.52                 |
| 20161              | Riley, KS                 | 0.067                | 85.67                     | 43.73                 |
| 20163              | Rooks, KS                 | -0.008               | 49.22                     | 14.2                  |
| 20165              | Rush, KS                  | 0.001                | 56.03                     | 7.83                  |
| 20167              | Russell, KS               | 0.014                | 64.41                     | 23.92                 |
| 20169              | Saline, KS                | -0.023               | 39.67                     | 41.62                 |
| 20171              | Scott, KS                 | 0.047                | 79.56                     | 30.61                 |
| 20173              | Sedgwick, KS              | -0.093               | 10.51                     | 53.57                 |
| 20175              | Seward, KS                | -0.217               | 0.89                      | 91.11                 |
| 20177              | Shawnee, KS               | -0.029               | 35.5                      | 50.99                 |
| 20179              | Sheridan, KS              | -0.039               | 29.61                     | 6.85                  |
| 20181              | Sherman, KS               | -0.039               | 29.86                     | 49.84                 |
| 20183              | Smith, KS                 | -0.057               | 22.22                     | 5.03                  |

| <b>County FIPS</b> | <b>County Description</b> | <b>DOS-SVI Index</b> | <b>DOS-SVI Percentile</b> | <b>SVI Percentile</b> |
|--------------------|---------------------------|----------------------|---------------------------|-----------------------|
| 20185              | Stafford, KS              | -0.004               | 51.7                      | 27.77                 |
| 20187              | Stanton, KS               | -0.081               | 13.34                     | 49.65                 |
| 20189              | Stevens, KS               | -0.112               | 7.16                      | 67.39                 |
| 20191              | Sumner, KS                | 0.008                | 60.59                     | 22.23                 |
| 20193              | Thomas, KS                | 0.038                | 76.38                     | 7.04                  |
| 20195              | Trego, KS                 | -0.129               | 4.81                      | 3.89                  |
| 20197              | Wabaunsee, KS             | 0.076                | 87.52                     | 5.32                  |
| 20199              | Wallace, KS               | -0.032               | 33.72                     | 14.3                  |
| 20201              | Washington, KS            | 0.008                | 60.62                     | 14.81                 |
| 20203              | Wichita, KS               | 0.006                | 59.31                     | 46.78                 |
| 20205              | Wilson, KS                | 0.008                | 60.65                     | 63.66                 |
| 20207              | Woodson, KS               | -0.008               | 49.41                     | 43.98                 |
| 20209              | Wyandotte, KS             | -0.184               | 1.72                      | 92.42                 |
| 21001              | Adair, KY                 | 0.115                | 93.38                     | 71.21                 |
| 21003              | Allen, KY                 | -0.019               | 42.76                     | 67.96                 |
| 21005              | Anderson, KY              | 0.007                | 60.27                     | 26.37                 |
| 21007              | Ballard, KY               | -0.006               | 50.75                     | 44.59                 |
| 21009              | Barren, KY                | -0.018               | 42.92                     | 77.61                 |
| 21011              | Bath, KY                  | -0.044               | 27.64                     | 72.9                  |
| 21013              | Bell, KY                  | -0.049               | 25.31                     | 89.27                 |
| 21015              | Boone, KY                 | -0.086               | 11.97                     | 12.77                 |
| 21017              | Bourbon, KY               | -0.07                | 16.62                     | 55.61                 |
| 21019              | Boyd, KY                  | -0.033               | 33.02                     | 69.08                 |
| 21021              | Boyle, KY                 | 0.063                | 84.43                     | 43.15                 |
| 21023              | Bracken, KY               | 0.049                | 80.04                     | 38.66                 |
| 21025              | Breathitt, KY             | 0.073                | 87.07                     | 82.2                  |
| 21027              | Breckinridge, KY          | 0.113                | 93.12                     | 73.76                 |
| 21029              | Bullitt, KY               | -0.025               | 38.36                     | 13.85                 |
| 21031              | Butler, KY                | -0.028               | 36.07                     | 79.2                  |
| 21033              | Caldwell, KY              | 0.02                 | 67.75                     | 49.81                 |
| 21035              | Calloway, KY              | 0.043                | 77.91                     | 49.97                 |
| 21037              | Campbell, KY              | -0.027               | 36.71                     | 21.88                 |
| 21039              | Carlisle, KY              | -0.001               | 54.82                     | 33.95                 |
| 21041              | Carroll, KY               | 0.108                | 92.55                     | 89.04                 |
| 21043              | Carter, KY                | -0.011               | 46.83                     | 82.04                 |
| 21045              | Casey, KY                 | -0.002               | 54.09                     | 76.56                 |
| 21047              | Christian, KY             | 0.055                | 81.95                     | 91.27                 |
| 21049              | Clark, KY                 | -0.05                | 24.67                     | 60.61                 |
| 21051              | Clay, KY                  | 0.094                | 90.77                     | 90.99                 |
| 21053              | Clinton, KY               | 0.007                | 60.3                      | 77.8                  |
| 21055              | Crittenden, KY            | 0.016                | 65.65                     | 48.44                 |
| 21057              | Cumberland, KY            | 0.036                | 75.23                     | 53.15                 |
| 21059              | Daviess, KY               | -0.002               | 54.06                     | 61.69                 |
| 21061              | Edmonson, KY              | 0.046                | 79.15                     | 63.57                 |
| 21063              | Elliott, KY               | 0.063                | 84.37                     | 72.39                 |
| 21065              | Estill, KY                | -0.041               | 28.91                     | 79.97                 |
| 21067              | Fayette, KY               | -0.109               | 7.58                      | 48.76                 |
| 21069              | Fleming, KY               | 0.002                | 56.92                     | 77.1                  |
| 21071              | Floyd, KY                 | -0.001               | 54.47                     | 85.03                 |
| 21073              | Franklin, KY              | -0.031               | 34.16                     | 54.68                 |
| 21075              | Fulton, KY                | -0.096               | 10.12                     | 87.04                 |
| 21077              | Gallatin, KY              | 0.015                | 65.33                     | 61.24                 |
| 21079              | Garrard, KY               | -0.009               | 48.33                     | 42.99                 |
| 21081              | Grant, KY                 | 0.051                | 80.71                     | 56.02                 |
| 21083              | Graves, KY                | 0.028                | 71.25                     | 77.52                 |

| <b>County FIPS</b> | <b>County Description</b> | <b>DOS-SVI Index</b> | <b>DOS-SVI Percentile</b> | <b>SVI Percentile</b> |
|--------------------|---------------------------|----------------------|---------------------------|-----------------------|
| 21085              | Grayson, KY               | -0.019               | 42.66                     | 60.96                 |
| 21087              | Green, KY                 | -0.052               | 24                        | 52.26                 |
| 21089              | Greenup, KY               | -0.013               | 46                        | 32.17                 |
| 21091              | Hancock, KY               | -0.026               | 37.28                     | 38.22                 |
| 21093              | Hardin, KY                | -0.03                | 34.77                     | 56.72                 |
| 21095              | Harlan, KY                | -0.023               | 39.57                     | 88.03                 |
| 21097              | Harrison, KY              | 0.016                | 65.62                     | 50.57                 |
| 21099              | Hart, KY                  | 0.03                 | 72.53                     | 76.59                 |
| 21101              | Henderson, KY             | -0.073               | 15.79                     | 70.89                 |
| 21103              | Henry, KY                 | -0.024               | 38.81                     | 52.74                 |
| 21105              | Hickman, KY               | 0.012                | 63.32                     | 57.39                 |
| 21107              | Hopkins, KY               | -0.03                | 34.73                     | 55.41                 |
| 21109              | Jackson, KY               | -0.067               | 17.7                      | 66.62                 |
| 21111              | Jefferson, KY             | -0.084               | 12.38                     | 56.82                 |
| 21113              | Jessamine, KY             | -0.049               | 25.02                     | 52.01                 |
| 21115              | Johnson, KY               | 0.057                | 82.71                     | 81.02                 |
| 21117              | Kenton, KY                | -0.052               | 23.91                     | 33.79                 |
| 21119              | Knott, KY                 | 0.168                | 96.56                     | 85.48                 |
| 21121              | Knox, KY                  | -0.046               | 26.36                     | 83.25                 |
| 21123              | Larue, KY                 | -0.07                | 16.94                     | 53.18                 |
| 21125              | Laurel, KY                | 0.014                | 64.82                     | 75.22                 |
| 21127              | Lawrence, KY              | 0.064                | 84.66                     | 75.83                 |
| 21129              | Lee, KY                   | -0.034               | 32.25                     | 81.82                 |
| 21131              | Leslie, KY                | 0.094                | 90.8                      | 77.45                 |
| 21133              | Letcher, KY               | -0.023               | 39.54                     | 87.55                 |
| 21135              | Lewis, KY                 | -0.064               | 19.17                     | 62.42                 |
| 21137              | Lincoln, KY               | 0.033                | 73.61                     | 70.83                 |
| 21139              | Livingston, KY            | 0.044                | 78.25                     | 26.4                  |
| 21141              | Logan, KY                 | -0.018               | 43.04                     | 52.87                 |
| 21143              | Lyon, KY                  | 0.183                | 97.29                     | 32.52                 |
| 21145              | McCracken, KY             | -0.05                | 24.74                     | 41.53                 |
| 21147              | McCreary, KY              | 0.169                | 96.59                     | 87.8                  |
| 21149              | McLean, KY                | 0.019                | 67.14                     | 42.17                 |
| 21151              | Madison, KY               | -0.005               | 51.58                     | 49.68                 |
| 21153              | Magoffin, KY              | 0.084                | 89.3                      | 80.57                 |
| 21155              | Marion, KY                | 0.034                | 74.31                     | 90.57                 |
| 21157              | Marshall, KY              | 0.052                | 81.41                     | 27.23                 |
| 21159              | Martin, KY                | 0.181                | 97.2                      | 84.94                 |
| 21161              | Mason, KY                 | -0.032               | 33.62                     | 66.82                 |
| 21163              | Meade, KY                 | 0.097                | 91.4                      | 31.78                 |
| 21165              | Menifee, KY               | 0.011                | 62.69                     | 58.47                 |
| 21167              | Mercer, KY                | 0.001                | 56.67                     | 41.34                 |
| 21169              | Metcalfe, KY              | -0.078               | 14.1                      | 68.12                 |
| 21171              | Monroe, KY                | -0.016               | 44.03                     | 69.75                 |
| 21173              | Montgomery, KY            | -0.024               | 38.59                     | 79.87                 |
| 21175              | Morgan, KY                | 0.072                | 86.72                     | 82.93                 |
| 21177              | Muhlenberg, KY            | 0.024                | 69.66                     | 61.34                 |
| 21179              | Nelson, KY                | 0.038                | 76.15                     | 28.95                 |
| 21181              | Nicholas, KY              | 0.06                 | 83.7                      | 81.97                 |
| 21183              | Ohio, KY                  | -0.019               | 42.38                     | 57.99                 |
| 21185              | Oldham, KY                | 0.078                | 88.28                     | 3.95                  |
| 21187              | Owen, KY                  | 0.074                | 87.17                     | 52.64                 |
| 21189              | Owsley, KY                | -0.092               | 10.7                      | 84.14                 |
| 21191              | Pendleton, KY             | -0.033               | 32.82                     | 41.5                  |
| 21193              | Perry, KY                 | 0.044                | 78.32                     | 90.51                 |



| <b>County FIPS</b> | <b>County Description</b> | <b>DOS-SVI Index</b> | <b>DOS-SVI Percentile</b> | <b>SVI Percentile</b> |
|--------------------|---------------------------|----------------------|---------------------------|-----------------------|
| 21195              | Pike, KY                  | -0.035               | 31.65                     | 79.08                 |
| 21197              | Powell, KY                | 0.069                | 86.18                     | 77.32                 |
| 21199              | Pulaski, KY               | -0.047               | 25.82                     | 74.2                  |
| 21201              | Robertson, KY             | -0.082               | 13.12                     | 35.38                 |
| 21203              | Rockcastle, KY            | -0.02                | 41.8                      | 78.82                 |
| 21205              | Rowan, KY                 | 0.087                | 89.78                     | 75.57                 |
| 21207              | Russell, KY               | 0.028                | 71.03                     | 86.34                 |
| 21209              | Scott, KY                 | 0.008                | 60.84                     | 33.31                 |
| 21211              | Shelby, KY                | 0.027                | 71                        | 42.61                 |
| 21213              | Simpson, KY               | -0.065               | 18.56                     | 28.79                 |
| 21215              | Spencer, KY               | -0.018               | 43.33                     | 3.69                  |
| 21217              | Taylor, KY                | -0.069               | 17.07                     | 72.1                  |
| 21219              | Todd, KY                  | 0.088                | 89.88                     | 80.92                 |
| 21221              | Trigg, KY                 | 0.045                | 78.67                     | 36.5                  |
| 21223              | Trimble, KY               | 0.046                | 79.24                     | 71.43                 |
| 21225              | Union, KY                 | 0.071                | 86.5                      | 53.66                 |
| 21227              | Warren, KY                | -0.014               | 44.76                     | 70.96                 |
| 21229              | Washington, KY            | 0.034                | 74.08                     | 51.27                 |
| 21231              | Wayne, KY                 | 0.034                | 74.12                     | 74.78                 |
| 21233              | Webster, KY               | 0.006                | 59.38                     | 78.54                 |
| 21235              | Whitley, KY               | 0.062                | 84.11                     | 83.79                 |
| 21237              | Wolfe, KY                 | -0.003               | 53.04                     | 86.21                 |
| 21239              | Woodford, KY              | -0.084               | 12.42                     | 20.41                 |
| 22001              | Acadia, LA                | -0.024               | 38.91                     | 91.82                 |
| 22003              | Allen, LA                 | 0.257                | 98.34                     | 92.61                 |
| 22005              | Ascension, LA             | -0.03                | 34.51                     | 39.68                 |
| 22007              | Assumption, LA            | -0.087               | 11.91                     | 77.9                  |
| 22009              | Avoyelles, LA             | 0.038                | 75.93                     | 96.34                 |
| 22011              | Beauregard, LA            | 0.009                | 61.41                     | 65.19                 |
| 22013              | Bienville, LA             | -0.03                | 35.15                     | 94.01                 |
| 22015              | Bossier, LA               | -0.05                | 24.71                     | 58.76                 |
| 22017              | Caddo, LA                 | -0.129               | 4.71                      | 83.85                 |
| 22019              | Calcasieu, LA             | -0.056               | 22.35                     | 73.92                 |
| 22021              | Caldwell, LA              | 0.117                | 93.63                     | 93.31                 |
| 22023              | Cameron, LA               | 0.05                 | 80.61                     | 26.43                 |
| 22025              | Catahoula, LA             | 0.055                | 82.2                      | 78.06                 |
| 22027              | Claiborne, LA             | 0.01                 | 62.02                     | 94.78                 |
| 22029              | Concordia, LA             | 0.088                | 89.94                     | 91.34                 |
| 22031              | De Soto, LA               | -0.058               | 21.62                     | 89.17                 |
| 22033              | East Baton Rouge, LA      | -0.152               | 3.34                      | 66.53                 |
| 22035              | East Carroll, LA          | 0.353                | 99.33                     | 93.57                 |
| 22037              | East Feliciana, LA        | 0.207                | 97.74                     | 81.85                 |
| 22039              | Evangeline, LA            | -0.017               | 43.49                     | 99.75                 |
| 22041              | Franklin, LA              | -0.009               | 48.74                     | 95.19                 |
| 22043              | Grant, LA                 | 0.145                | 95.54                     | 62.74                 |
| 22045              | Iberia, LA                | -0.037               | 30.88                     | 96.05                 |
| 22047              | Iberville, LA             | 0.056                | 82.27                     | 88.6                  |
| 22049              | Jackson, LA               | -0.029               | 35.88                     | 93.82                 |
| 22051              | Jefferson, LA             | -0.197               | 1.43                      | 61.21                 |
| 22053              | Jefferson Davis, LA       | 0.006                | 59.76                     | 81.05                 |
| 22055              | Lafayette, LA             | -0.088               | 11.72                     | 62.17                 |
| 22057              | Lafourche, LA             | -0.055               | 22.51                     | 76.69                 |
| 22059              | LaSalle, LA               | 0.01                 | 62.27                     | 76.34                 |
| 22061              | Lincoln, LA               | -0.028               | 36.17                     | 84.78                 |
| 22063              | Livingston, LA            | 0.01                 | 62.15                     | 43.09                 |

| <b>County FIPS</b> | <b>County Description</b> | <b>DOS-SVI Index</b> | <b>DOS-SVI Percentile</b> | <b>SVI Percentile</b> |
|--------------------|---------------------------|----------------------|---------------------------|-----------------------|
| 22065              | Madison, LA               | 0.084                | 89.24                     | 96.97                 |
| 22067              | Morehouse, LA             | -0.033               | 32.66                     | 88.47                 |
| 22069              | Natchitoches, LA          | -0.058               | 21.49                     | 85.73                 |
| 22071              | Orleans, LA               | -0.098               | 9.65                      | 74.49                 |
| 22073              | Ouachita, LA              | -0.023               | 39.89                     | 85.22                 |
| 22075              | Plaquemines, LA           | -0.115               | 6.59                      | 70.61                 |
| 22077              | Pointe Coupee, LA         | 0.039                | 76.41                     | 84.75                 |
| 22079              | Rapides, LA               | -0.059               | 21.2                      | 90.86                 |
| 22081              | Red River, LA             | -0.045               | 27.44                     | 81.37                 |
| 22083              | Richland, LA              | -0.066               | 17.89                     | 85.54                 |
| 22085              | Sabine, LA                | 0.043                | 78.03                     | 83.15                 |
| 22087              | St. Bernard, LA           | -0.077               | 14.77                     | 77.13                 |
| 22089              | St. Charles, LA           | -0.041               | 29.1                      | 35.29                 |
| 22091              | St. Helena, LA            | -0.022               | 40.12                     | 90                    |
| 22093              | St. James, LA             | 0.04                 | 76.86                     | 62.99                 |
| 22095              | St. John the Baptist, LA  | -0.09                | 11.08                     | 74.68                 |
| 22097              | St. Landry, LA            | -0.065               | 18.72                     | 92.2                  |
| 22099              | St. Martin, LA            | -0.021               | 41.01                     | 78.31                 |
| 22101              | St. Mary, LA              | -0.046               | 26.68                     | 91.62                 |
| 22103              | St. Tammany, LA           | -0.069               | 17.19                     | 31.05                 |
| 22105              | Tangipahoa, LA            | -0.046               | 26.52                     | 88.85                 |
| 22107              | Tensas, LA                | 0.009                | 61.7                      | 83.66                 |
| 22109              | Terrebonne, LA            | -0.069               | 17.26                     | 89.52                 |
| 22111              | Union, LA                 | 0.062                | 84.3                      | 80.8                  |
| 22113              | Vermilion, LA             | 0.043                | 78.06                     | 82.01                 |
| 22115              | Vernon, LA                | 0.032                | 73.32                     | 74.33                 |
| 22117              | Washington, LA            | -0.027               | 36.48                     | 99.62                 |
| 22119              | Webster, LA               | -0.065               | 18.69                     | 87.9                  |
| 22121              | West Baton Rouge, LA      | -0.045               | 27.22                     | 76.11                 |
| 22123              | West Carroll, LA          | -0.04                | 29.45                     | 66.85                 |
| 22125              | West Feliciana, LA        | 0.141                | 95.38                     | 69.01                 |
| 22127              | Winn, LA                  | 0.025                | 70.07                     | 77.55                 |
| 23001              | Androscoggin, ME          | -0.004               | 51.96                     | 55.67                 |
| 23003              | Aroostook, ME             | -0.01                | 47.69                     | 59.46                 |
| 23005              | Cumberland, ME            | 0.003                | 57.82                     | 13.63                 |
| 23007              | Franklin, ME              | 0.046                | 78.96                     | 21.5                  |
| 23009              | Hancock, ME               | 0.062                | 84.24                     | 19.3                  |
| 23011              | Kennebec, ME              | 0.033                | 73.54                     | 37.87                 |
| 23013              | Knox, ME                  | 0.031                | 72.62                     | 14.75                 |
| 23015              | Lincoln, ME               | -0.032               | 33.21                     | 11.43                 |
| 23017              | Oxford, ME                | -0.017               | 43.52                     | 37.26                 |
| 23019              | Penobscot, ME             | 0.029                | 72.17                     | 45.32                 |
| 23021              | Piscataquis, ME           | -0.029               | 35.34                     | 48.98                 |
| 23023              | Sagadahoc, ME             | -0.038               | 30.44                     | 5.22                  |
| 23025              | Somerset, ME              | 0.042                | 77.46                     | 62.2                  |
| 23027              | Waldo, ME                 | 0.031                | 72.65                     | 21.97                 |
| 23029              | Washington, ME            | -0.025               | 37.98                     | 64.39                 |
| 23031              | York, ME                  | 0.004                | 58.17                     | 9.36                  |
| 24001              | Allegany, MD              | 0.109                | 92.58                     | 62.1                  |
| 24003              | Anne Arundel, MD          | -0.066               | 18.18                     | 17.83                 |
| 24005              | Baltimore, MD             | -0.151               | 3.41                      | 38.18                 |
| 24009              | Calvert, MD               | -0.037               | 31.11                     | 4.71                  |
| 24011              | Caroline, MD              | -0.062               | 19.99                     | 55.35                 |
| 24013              | Carroll, MD               | 0.009                | 61.09                     | 4.04                  |
| 24015              | Cecil, MD                 | 0.008                | 60.78                     | 29.33                 |

| <b>County FIPS</b> | <b>County Description</b> | <b>DOS-SVI Index</b> | <b>DOS-SVI Percentile</b> | <b>SVI Percentile</b> |
|--------------------|---------------------------|----------------------|---------------------------|-----------------------|
| 24017              | Charles, MD               | -0.119               | 6.02                      | 17.23                 |
| 24019              | Dorchester, MD            | -0.112               | 7.04                      | 75.06                 |
| 24021              | Frederick, MD             | -0.081               | 13.31                     | 15.89                 |
| 24023              | Garrett, MD               | 0.008                | 60.33                     | 18.12                 |
| 24025              | Harford, MD               | -0.062               | 19.9                      | 9.33                  |
| 24027              | Howard, MD                | -0.131               | 4.49                      | 13.06                 |
| 24029              | Kent, MD                  | -0.008               | 49.03                     | 42.77                 |
| 24031              | Montgomery, MD            | -0.193               | 1.53                      | 32.55                 |
| 24033              | Prince George's, MD       | -0.21                | 1.11                      | 62.61                 |
| 24035              | Queen Anne's, MD          | -0.004               | 52.24                     | 2.2                   |
| 24037              | St. Mary's, MD            | -0.052               | 23.94                     | 20.86                 |
| 24039              | Somerset, MD              | 0.097                | 91.37                     | 89.78                 |
| 24041              | Talbot, MD                | -0.117               | 6.34                      | 13.31                 |
| 24043              | Washington, MD            | -0.005               | 51.51                     | 61.4                  |
| 24045              | Wicomico, MD              | -0.038               | 30.18                     | 77.39                 |
| 24047              | Worcester, MD             | -0.234               | 0.64                      | 28.03                 |
| 24510              | Baltimore City, MD        | -0.029               | 35.66                     | 83.12                 |
| 25001              | Barnstable, MA            | -0.009               | 48.71                     | 5.64                  |
| 25003              | Berkshire, MA             | -0.024               | 39.26                     | 40.83                 |
| 25005              | Bristol, MA               | -0.092               | 10.92                     | 52.48                 |
| 25007              | Dukes, MA                 | -0.009               | 48.42                     | 0.96                  |
| 25009              | Essex, MA                 | -0.108               | 7.67                      | 50.8                  |
| 25011              | Franklin, MA              | -0.022               | 40.18                     | 20.96                 |
| 25013              | Hampden, MA               | -0.129               | 4.74                      | 82.32                 |
| 25015              | Hampshire, MA             | 0.1                  | 91.79                     | 23.25                 |
| 25017              | Middlesex, MA             | -0.048               | 25.41                     | 22.64                 |
| 25019              | Nantucket, MA             | 0.007                | 59.92                     | 2.68                  |
| 25021              | Norfolk, MA               | -0.048               | 25.57                     | 20.92                 |
| 25023              | Plymouth, MA              | -0.049               | 24.8                      | 23.03                 |
| 25025              | Suffolk, MA               | -0.072               | 16.2                      | 73.79                 |
| 25027              | Worcester, MA             | -0.026               | 37.6                      | 40.96                 |
| 26001              | Alcona, MI                | -0.025               | 38.27                     | 25.57                 |
| 26003              | Alger, MI                 | 0.134                | 94.87                     | 44.81                 |
| 26005              | Allegan, MI               | 0.036                | 75.33                     | 17.58                 |
| 26007              | Alpena, MI                | -0.027               | 36.74                     | 34.08                 |
| 26009              | Antrim, MI                | -0.003               | 52.98                     | 11.56                 |
| 26011              | Arenac, MI                | -0.007               | 49.95                     | 50.54                 |
| 26013              | Baraga, MI                | 0.165                | 96.43                     | 65.99                 |
| 26015              | Barry, MI                 | 0.042                | 77.56                     | 8.69                  |
| 26017              | Bay, MI                   | -0.07                | 16.81                     | 44.04                 |
| 26019              | Benzie, MI                | 0.019                | 67.33                     | 10.51                 |
| 26021              | Berrien, MI               | -0.03                | 34.64                     | 64.75                 |
| 26023              | Branch, MI                | 0.023                | 69.34                     | 63.15                 |
| 26025              | Calhoun, MI               | -0.088               | 11.62                     | 72.42                 |
| 26027              | Cass, MI                  | 0.002                | 56.86                     | 32.8                  |
| 26029              | Charlevoix, MI            | -0.024               | 38.55                     | 9.68                  |
| 26031              | Cheboygan, MI             | -0.011               | 46.99                     | 28.6                  |
| 26033              | Chippewa, MI              | 0.032                | 73.48                     | 72.45                 |
| 26035              | Clare, MI                 | 0.035                | 74.75                     | 77.2                  |
| 26037              | Clinton, MI               | -0.041               | 29.2                      | 4.01                  |
| 26039              | Crawford, MI              | 0.001                | 56.13                     | 36.97                 |
| 26041              | Delta, MI                 | -0.01                | 48.07                     | 35.45                 |
| 26043              | Dickinson, MI             | 0.005                | 58.68                     | 22.96                 |
| 26045              | Eaton, MI                 | -0.066               | 18.27                     | 31.31                 |
| 26047              | Emmet, MI                 | -0.013               | 45.88                     | 13.57                 |

| <b>County FIPS</b> | <b>County Description</b> | <b>DOS-SVI Index</b> | <b>DOS-SVI Percentile</b> | <b>SVI Percentile</b> |
|--------------------|---------------------------|----------------------|---------------------------|-----------------------|
| 26049              | Genesee, MI               | -0.093               | 10.63                     | 66.24                 |
| 26051              | Gladwin, MI               | 0.016                | 65.9                      | 53.98                 |
| 26053              | Gogebic, MI               | 0.068                | 85.9                      | 40.38                 |
| 26055              | Grand Traverse, MI        | 0.016                | 65.58                     | 18.03                 |
| 26057              | Gratiot, MI               | 0.071                | 86.47                     | 60.35                 |
| 26059              | Hillsdale, MI             | 0.059                | 83.03                     | 50.19                 |
| 26061              | Houghton, MI              | 0.142                | 95.42                     | 49.62                 |
| 26063              | Huron, MI                 | 0.005                | 58.77                     | 27.45                 |
| 26065              | Ingham, MI                | -0.053               | 23.46                     | 57.42                 |
| 26067              | Ionia, MI                 | 0.066                | 85.48                     | 47.8                  |
| 26069              | Iosco, MI                 | -0.019               | 42.5                      | 44.94                 |
| 26071              | Iron, MI                  | -0.006               | 50.88                     | 28.25                 |
| 26073              | Isabella, MI              | -0.009               | 48.58                     | 60.16                 |
| 26075              | Jackson, MI               | 0                    | 55.08                     | 55.06                 |
| 26077              | Kalamazoo, MI             | -0.077               | 14.64                     | 40.7                  |
| 26079              | Kalkaska, MI              | 0.021                | 68.07                     | 50.83                 |
| 26081              | Kent, MI                  | -0.078               | 14.17                     | 47.61                 |
| 26083              | Keweenaw, MI              | -0.006               | 50.94                     | 7.87                  |
| 26085              | Lake, MI                  | 0.046                | 79.31                     | 78.18                 |
| 26087              | Lapeer, MI                | 0.038                | 76.09                     | 23.82                 |
| 26089              | Leelanau, MI              | 0.023                | 69.41                     | 2.45                  |
| 26091              | Lenawee, MI               | -0.005               | 51.61                     | 40.76                 |
| 26093              | Livingston, MI            | 0.023                | 68.93                     | 0.67                  |
| 26095              | Luce, MI                  | 0.152                | 95.96                     | 53.38                 |
| 26097              | Mackinac, MI              | 0.049                | 80.2                      | 64.52                 |
| 26099              | Macomb, MI                | -0.063               | 19.71                     | 32.96                 |
| 26101              | Manistee, MI              | 0.072                | 86.79                     | 39.97                 |
| 26103              | Marquette, MI             | 0.032                | 73.26                     | 30.57                 |
| 26105              | Mason, MI                 | -0.03                | 34.8                      | 33.76                 |
| 26107              | Mecosta, MI               | 0.071                | 86.56                     | 59.75                 |
| 26109              | Menominee, MI             | -0.008               | 49.51                     | 27.64                 |
| 26111              | Midland, MI               | 0.006                | 59.34                     | 16.18                 |
| 26113              | Missaukee, MI             | 0.068                | 86.02                     | 47.55                 |
| 26115              | Monroe, MI                | -0.017               | 43.55                     | 14.94                 |
| 26117              | Montcalm, MI              | 0.014                | 64.69                     | 61.27                 |
| 26119              | Montmorency, MI           | 0.014                | 64.31                     | 37.29                 |
| 26121              | Muskegon, MI              | -0.019               | 42.53                     | 70.35                 |
| 26123              | Newaygo, MI               | 0.023                | 69.44                     | 63.18                 |
| 26125              | Oakland, MI               | -0.075               | 15.09                     | 11.4                  |
| 26127              | Oceana, MI                | 0.068                | 85.96                     | 85.8                  |
| 26129              | Ogemaw, MI                | 0.023                | 69.15                     | 62.58                 |
| 26131              | Ontonagon, MI             | 0.037                | 75.61                     | 27.32                 |
| 26133              | Osceola, MI               | 0.041                | 77.17                     | 74.01                 |
| 26135              | Oscoda, MI                | 0.037                | 75.71                     | 66.94                 |
| 26137              | Otsego, MI                | 0.024                | 69.72                     | 36.94                 |
| 26139              | Ottawa, MI                | 0.022                | 68.61                     | 21.72                 |
| 26141              | Presque Isle, MI          | 0.004                | 57.98                     | 27.61                 |
| 26143              | Roscommon, MI             | -0.019               | 42.73                     | 46.27                 |
| 26145              | Saginaw, MI               | -0.061               | 20.25                     | 70.48                 |
| 26147              | St. Clair, MI             | -0.027               | 36.99                     | 27.9                  |
| 26149              | St. Joseph, MI            | -0.007               | 50.3                      | 65.16                 |
| 26151              | Sanilac, MI               | 0.001                | 55.78                     | 48.34                 |
| 26153              | Schoolcraft, MI           | -0.034               | 32.38                     | 54.52                 |
| 26155              | Shiawassee, MI            | -0.03                | 34.99                     | 13.25                 |
| 26157              | Tuscola, MI               | 0.045                | 78.83                     | 39.59                 |

| <b>County FIPS</b> | <b>County Description</b> | <b>DOS-SVI Index</b> | <b>DOS-SVI Percentile</b> | <b>SVI Percentile</b> |
|--------------------|---------------------------|----------------------|---------------------------|-----------------------|
| 26159              | Van Buren, MI             | 0.011                | 62.62                     | 65.89                 |
| 26161              | Washtenaw, MI             | -0.018               | 43.23                     | 22.36                 |
| 26163              | Wayne, MI                 | -0.117               | 6.3                       | 87.23                 |
| 26165              | Wexford, MI               | -0.01                | 47.6                      | 50.35                 |
| 27001              | Aitkin, MN                | 0.002                | 57.02                     | 30.83                 |
| 27003              | Anoka, MN                 | -0.045               | 27.48                     | 14.04                 |
| 27005              | Becker, MN                | -0.011               | 47.41                     | 29.9                  |
| 27007              | Beltrami, MN              | -0.011               | 46.86                     | 77.71                 |
| 27009              | Benton, MN                | -0.072               | 16.17                     | 43.18                 |
| 27011              | Big Stone, MN             | -0.014               | 44.92                     | 20.06                 |
| 27013              | Blue Earth, MN            | -0.049               | 25.34                     | 28.38                 |
| 27015              | Brown, MN                 | -0.026               | 37.15                     | 12.74                 |
| 27017              | Carlton, MN               | 0.055                | 82.11                     | 26.66                 |
| 27019              | Carver, MN                | 0.005                | 58.96                     | 1.24                  |
| 27021              | Cass, MN                  | 0.013                | 64.09                     | 35                    |
| 27023              | Chippewa, MN              | -0.069               | 17                        | 35.22                 |
| 27025              | Chisago, MN               | 0.037                | 75.8                      | 5.92                  |
| 27027              | Clay, MN                  | -0.028               | 36.2                      | 22.17                 |
| 27029              | Clearwater, MN            | 0.035                | 75.07                     | 79.17                 |
| 27031              | Cook, MN                  | 0.208                | 97.87                     | 20.29                 |
| 27033              | Cottonwood, MN            | 0.02                 | 67.72                     | 47.26                 |
| 27035              | Crow Wing, MN             | -0.043               | 27.89                     | 12.23                 |
| 27037              | Dakota, MN                | -0.123               | 5.57                      | 12.07                 |
| 27039              | Dodge, MN                 | -0.049               | 24.93                     | 5.73                  |
| 27041              | Douglas, MN               | -0.046               | 26.55                     | 4.46                  |
| 27043              | Faribault, MN             | -0.048               | 25.47                     | 15.7                  |
| 27045              | Fillmore, MN              | 0.039                | 76.66                     | 21.69                 |
| 27047              | Freeborn, MN              | -0.118               | 6.24                      | 43.28                 |
| 27049              | Goodhue, MN               | -0.021               | 41.1                      | 17.07                 |
| 27051              | Grant, MN                 | -0.04                | 29.48                     | 9.46                  |
| 27053              | Hennepin, MN              | -0.125               | 5.29                      | 30.92                 |
| 27055              | Houston, MN               | -0.008               | 49.63                     | 1.85                  |
| 27057              | Hubbard, MN               | 0.036                | 75.39                     | 20.51                 |
| 27059              | Isanti, MN                | -0.018               | 42.98                     | 10.22                 |
| 27061              | Itasca, MN                | 0.052                | 81.09                     | 32.93                 |
| 27063              | Jackson, MN               | -0.011               | 46.93                     | 3.06                  |
| 27065              | Kanabec, MN               | 0.016                | 65.55                     | 28.41                 |
| 27067              | Kandiyohi, MN             | -0.046               | 26.27                     | 40.64                 |
| 27069              | Kittson, MN               | 0.037                | 75.74                     | 9.97                  |
| 27071              | Koochiching, MN           | -0.059               | 21.27                     | 43.66                 |
| 27073              | Lac qui Parle, MN         | -0.035               | 32.03                     | 10.06                 |
| 27075              | Lake, MN                  | 0.03                 | 72.49                     | 11.02                 |
| 27077              | Lake of the Woods, MN     | 0.017                | 66.28                     | 15.76                 |
| 27079              | Le Sueur, MN              | -0.001               | 55.01                     | 11.46                 |
| 27081              | Lincoln, MN               | 0.001                | 56.57                     | 6.66                  |
| 27083              | Lyon, MN                  | -0.022               | 40.31                     | 45.32                 |
| 27085              | McLeod, MN                | -0.088               | 11.59                     | 12.61                 |
| 27087              | Mahnomen, MN              | -0.062               | 19.93                     | 87.17                 |
| 27089              | Marshall, MN              | -0.023               | 39.95                     | 14.11                 |
| 27091              | Martin, MN                | -0.083               | 12.67                     | 19.33                 |
| 27093              | Meeker, MN                | 0.042                | 77.75                     | 18.69                 |
| 27095              | Mille Lacs, MN            | -0.02                | 42.22                     | 59.17                 |
| 27097              | Morrison, MN              | 0                    | 55.68                     | 26.82                 |
| 27099              | Mower, MN                 | -0.059               | 20.98                     | 62.83                 |
| 27101              | Murray, MN                | -0.031               | 33.91                     | 10.64                 |

| <b>County FIPS</b> | <b>County Description</b> | <b>DOS-SVI Index</b> | <b>DOS-SVI Percentile</b> | <b>SVI Percentile</b> |
|--------------------|---------------------------|----------------------|---------------------------|-----------------------|
| 27103              | Nicollet, MN              | -0.007               | 49.83                     | 25.13                 |
| 27105              | Nobles, MN                | -0.183               | 1.75                      | 81.5                  |
| 27107              | Norman, MN                | 0.033                | 73.93                     | 32.48                 |
| 27109              | Olmsted, MN               | -0.039               | 29.93                     | 25.99                 |
| 27111              | Otter Tail, MN            | 0.014                | 64.53                     | 20.99                 |
| 27113              | Pennington, MN            | -0.057               | 22                        | 30.16                 |
| 27115              | Pine, MN                  | 0.048                | 79.72                     | 46.31                 |
| 27117              | Pipestone, MN             | -0.046               | 26.43                     | 46.46                 |
| 27119              | Polk, MN                  | -0.023               | 39.92                     | 36.69                 |
| 27121              | Pope, MN                  | 0.012                | 63.04                     | 3.15                  |
| 27123              | Ramsey, MN                | -0.126               | 5.03                      | 63.34                 |
| 27125              | Red Lake, MN              | 0.032                | 73.13                     | 15.25                 |
| 27127              | Redwood, MN               | -0.059               | 21.14                     | 22.93                 |
| 27129              | Renville, MN              | -0.032               | 33.75                     | 19.68                 |
| 27131              | Rice, MN                  | 0.076                | 87.68                     | 39.3                  |
| 27133              | Rock, MN                  | 0.005                | 58.55                     | 15.32                 |
| 27135              | Roseau, MN                | -0.002               | 53.93                     | 24.78                 |
| 27137              | St. Louis, MN             | 0.016                | 65.46                     | 31.18                 |
| 27139              | Scott, MN                 | 0.039                | 76.5                      | 11.08                 |
| 27141              | Sherburne, MN             | 0.001                | 56.38                     | 8.85                  |
| 27143              | Sibley, MN                | -0.024               | 38.84                     | 13.15                 |
| 27145              | Stearns, MN               | -0.023               | 39.41                     | 38.85                 |
| 27147              | Steele, MN                | 0                    | 55.37                     | 30.13                 |
| 27149              | Stevens, MN               | 0                    | 55.05                     | 22.58                 |
| 27151              | Swift, MN                 | -0.084               | 12.48                     | 32.13                 |
| 27153              | Todd, MN                  | 0.059                | 83.25                     | 48.12                 |
| 27155              | Traverse, MN              | -0.034               | 32.51                     | 26.02                 |
| 27157              | Wabasha, MN               | -0.02                | 41.61                     | 5.89                  |
| 27159              | Wadena, MN                | -0.003               | 53.14                     | 65.54                 |
| 27161              | Waseca, MN                | 0.012                | 63.36                     | 25.03                 |
| 27163              | Washington, MN            | -0.031               | 34.29                     | 6.82                  |
| 27165              | Watonwan, MN              | -0.153               | 3.12                      | 51.91                 |
| 27167              | Wilkin, MN                | -0.015               | 44.41                     | 19.24                 |
| 27169              | Winona, MN                | 0.043                | 78.1                      | 21.15                 |
| 27171              | Wright, MN                | 0.032                | 73.51                     | 4.62                  |
| 27173              | Yellow Medicine, MN       | -0.059               | 21.11                     | 33.44                 |
| 28001              | Adams, MS                 | -0.159               | 2.8                       | 99.14                 |
| 28003              | Alcorn, MS                | -0.022               | 40.27                     | 69.55                 |
| 28005              | Amite, MS                 | -0.065               | 18.43                     | 81.91                 |
| 28007              | Attala, MS                | -0.008               | 49.28                     | 98.44                 |
| 28009              | Benton, MS                | -0.099               | 9.39                      | 66.05                 |
| 28011              | Bolivar, MS               | -0.158               | 2.9                       | 96.75                 |
| 28013              | Calhoun, MS               | -0.045               | 27.16                     | 96.5                  |
| 28015              | Carroll, MS               | 0.098                | 91.5                      | 63.03                 |
| 28017              | Chickasaw, MS             | -0.114               | 6.65                      | 91.43                 |
| 28019              | Choctaw, MS               | 0.029                | 71.82                     | 85.41                 |
| 28021              | Claiborne, MS             | 0.009                | 61.45                     | 99.2                  |
| 28023              | Clarke, MS                | -0.112               | 7.13                      | 66.69                 |
| 28025              | Clay, MS                  | -0.152               | 3.28                      | 70.54                 |
| 28027              | Coahoma, MS               | -0.107               | 8.02                      | 93.22                 |
| 28029              | Copiah, MS                | 0.021                | 68.39                     | 94.11                 |
| 28031              | Covington, MS             | -0.041               | 28.88                     | 78.79                 |
| 28033              | DeSoto, MS                | -0.035               | 32.09                     | 30.32                 |
| 28035              | Forrest, MS               | -0.089               | 11.3                      | 93.66                 |
| 28037              | Franklin, MS              | -0.058               | 21.46                     | 57.17                 |

| <b>County FIPS</b> | <b>County Description</b> | <b>DOS-SVI Index</b> | <b>DOS-SVI Percentile</b> | <b>SVI Percentile</b> |
|--------------------|---------------------------|----------------------|---------------------------|-----------------------|
| 28039              | George, MS                | 0.082                | 88.86                     | 61.37                 |
| 28041              | Greene, MS                | 0.34                 | 99.17                     | 60.67                 |
| 28043              | Grenada, MS               | -0.104               | 8.4                       | 87.71                 |
| 28045              | Hancock, MS               | -0.082               | 13.05                     | 59.24                 |
| 28047              | Harrison, MS              | -0.103               | 8.72                      | 88.38                 |
| 28049              | Hinds, MS                 | -0.111               | 7.29                      | 87.42                 |
| 28051              | Holmes, MS                | -0.111               | 7.2                       | 98.18                 |
| 28053              | Humphreys, MS             | -0.082               | 13.09                     | 93.69                 |
| 28055              | Issaquena, MS             | 0.188                | 97.39                     | 95.1                  |
| 28057              | Itawamba, MS              | -0.029               | 35.69                     | 54.87                 |
| 28059              | Jackson, MS               | -0.114               | 6.75                      | 54.33                 |
| 28061              | Jasper, MS                | -0.112               | 6.97                      | 76.91                 |
| 28063              | Jefferson, MS             | -0.086               | 12.07                     | 96.37                 |
| 28065              | Jefferson Davis, MS       | -0.062               | 19.96                     | 84.39                 |
| 28067              | Jones, MS                 | -0.054               | 23.02                     | 89.2                  |
| 28069              | Kemper, MS                | -0.005               | 51.13                     | 92.74                 |
| 28071              | Lafayette, MS             | -0.002               | 53.71                     | 50.96                 |
| 28073              | Lamar, MS                 | -0.033               | 33.14                     | 53.06                 |
| 28075              | Lauderdale, MS            | -0.039               | 29.99                     | 92.83                 |
| 28077              | Lawrence, MS              | 0.009                | 61                        | 66.34                 |
| 28079              | Leake, MS                 | -0.049               | 25.06                     | 99.46                 |
| 28081              | Lee, MS                   | -0.011               | 47.18                     | 79.52                 |
| 28083              | Leflore, MS               | -0.102               | 8.82                      | 96.53                 |
| 28085              | Lincoln, MS               | -0.015               | 44.7                      | 75.86                 |
| 28087              | Lowndes, MS               | -0.101               | 8.88                      | 79.75                 |
| 28089              | Madison, MS               | -0.089               | 11.46                     | 28.98                 |
| 28091              | Marion, MS                | 0.038                | 76.03                     | 93.5                  |
| 28093              | Marshall, MS              | -0.026               | 37.38                     | 69.04                 |
| 28095              | Monroe, MS                | -0.03                | 34.89                     | 63.98                 |
| 28097              | Montgomery, MS            | -0.167               | 2.32                      | 89.14                 |
| 28099              | Neshoba, MS               | 0.086                | 89.46                     | 96.85                 |
| 28101              | Newton, MS                | 0.002                | 57.15                     | 92.13                 |
| 28103              | Noxubee, MS               | -0.03                | 34.96                     | 98.6                  |
| 28105              | Oktibbeha, MS             | 0.019                | 67.3                      | 64.2                  |
| 28107              | Panola, MS                | -0.042               | 28.65                     | 89.33                 |
| 28109              | Pearl River, MS           | 0.028                | 71.16                     | 70.51                 |
| 28111              | Perry, MS                 | -0.003               | 53.2                      | 70.86                 |
| 28113              | Pike, MS                  | -0.123               | 5.51                      | 98.82                 |
| 28115              | Pontotoc, MS              | 0.021                | 68.51                     | 89.62                 |
| 28117              | Prentiss, MS              | 0.046                | 79.18                     | 85.13                 |
| 28119              | Quitman, MS               | 0.042                | 77.49                     | 95.45                 |
| 28121              | Rankin, MS                | 0.016                | 65.52                     | 31.27                 |
| 28123              | Scott, MS                 | -0.117               | 6.37                      | 98.5                  |
| 28125              | Sharkey, MS               | 0.108                | 92.42                     | 97.29                 |
| 28127              | Simpson, MS               | 0.043                | 78.19                     | 90.73                 |
| 28129              | Smith, MS                 | -0.052               | 24.07                     | 47.32                 |
| 28131              | Stone, MS                 | 0.123                | 94.14                     | 60.45                 |
| 28133              | Sunflower, MS             | 0.086                | 89.4                      | 94.94                 |
| 28135              | Tallahatchie, MS          | 0.111                | 92.87                     | 97.36                 |
| 28137              | Tate, MS                  | 0.114                | 93.28                     | 86.5                  |
| 28139              | Tippah, MS                | -0.002               | 53.87                     | 86.46                 |
| 28141              | Tishomingo, MS            | 0.035                | 74.63                     | 66.59                 |
| 28143              | Tunica, MS                | -0.193               | 1.5                       | 97.2                  |
| 28145              | Union, MS                 | -0.007               | 49.7                      | 82.77                 |
| 28147              | Walthall, MS              | -0.039               | 29.89                     | 86.11                 |

| <b>County FIPS</b> | <b>County Description</b> | <b>DOS-SVI Index</b> | <b>DOS-SVI Percentile</b> | <b>SVI Percentile</b> |
|--------------------|---------------------------|----------------------|---------------------------|-----------------------|
| 28149              | Warren, MS                | -0.088               | 11.75                     | 86.05                 |
| 28151              | Washington, MS            | -0.116               | 6.43                      | 97.83                 |
| 28153              | Wayne, MS                 | -0.061               | 20.31                     | 89.97                 |
| 28155              | Webster, MS               | -0.129               | 4.78                      | 59.62                 |
| 28157              | Wilkinson, MS             | 0.001                | 56.19                     | 91.69                 |
| 28159              | Winston, MS               | -0.028               | 36.42                     | 93.06                 |
| 28161              | Yalobusha, MS             | 0.015                | 65.01                     | 73.47                 |
| 28163              | Yazoo, MS                 | 0.062                | 84.27                     | 99.52                 |
| 29001              | Adair, MO                 | 0.074                | 87.14                     | 45.48                 |
| 29003              | Andrew, MO                | 0.038                | 75.9                      | 3.25                  |
| 29005              | Atchison, MO              | 0.012                | 62.91                     | 7.36                  |
| 29007              | Audrain, MO               | 0.072                | 86.76                     | 61.5                  |
| 29009              | Barry, MO                 | 0.031                | 72.59                     | 70.99                 |
| 29011              | Barton, MO                | 0.023                | 68.96                     | 59.94                 |
| 29013              | Bates, MO                 | 0.055                | 82.04                     | 38.57                 |
| 29015              | Benton, MO                | 0.043                | 78.13                     | 55.13                 |
| 29017              | Bollinger, MO             | 0.02                 | 67.65                     | 47.93                 |
| 29019              | Boone, MO                 | -0.006               | 50.68                     | 29.27                 |
| 29021              | Buchanan, MO              | -0.013               | 45.53                     | 71.82                 |
| 29023              | Butler, MO                | -0.043               | 27.86                     | 81.72                 |
| 29025              | Caldwell, MO              | 0.136                | 95.1                      | 45.13                 |
| 29027              | Callaway, MO              | 0.048                | 79.62                     | 32.32                 |
| 29029              | Camden, MO                | -0.114               | 6.62                      | 33.63                 |
| 29031              | Cape Girardeau, MO        | 0.023                | 69.47                     | 41.18                 |
| 29033              | Carroll, MO               | 0.028                | 71.22                     | 53.25                 |
| 29035              | Carter, MO                | 0.031                | 72.88                     | 74.55                 |
| 29037              | Cass, MO                  | 0                    | 55.52                     | 11.88                 |
| 29039              | Cedar, MO                 | -0.031               | 34.38                     | 64.11                 |
| 29041              | Chariton, MO              | 0.056                | 82.39                     | 18.98                 |
| 29043              | Christian, MO             | 0.028                | 71.28                     | 14.97                 |
| 29045              | Clark, MO                 | 0.009                | 61.16                     | 34.2                  |
| 29047              | Clay, MO                  | -0.07                | 16.59                     | 13.63                 |
| 29049              | Clinton, MO               | -0.031               | 34.23                     | 16.43                 |
| 29051              | Cole, MO                  | -0.004               | 51.89                     | 25.83                 |
| 29053              | Cooper, MO                | 0.077                | 87.81                     | 38.92                 |
| 29055              | Crawford, MO              | 0.003                | 57.4                      | 75.54                 |
| 29057              | Dade, MO                  | 0.047                | 79.43                     | 66.37                 |
| 29059              | Dallas, MO                | 0.025                | 69.85                     | 70.19                 |
| 29061              | Daviess, MO               | 0.11                 | 92.74                     | 47.07                 |
| 29063              | DeKalb, MO                | 0.322                | 98.98                     | 40.54                 |
| 29065              | Dent, MO                  | 0.004                | 58.23                     | 63.12                 |
| 29067              | Douglas, MO               | 0.042                | 77.78                     | 52.32                 |
| 29069              | Dunklin, MO               | -0.083               | 12.83                     | 95.8                  |
| 29071              | Franklin, MO              | -0.01                | 47.91                     | 14.59                 |
| 29073              | Gasconade, MO             | -0.002               | 53.96                     | 8.54                  |
| 29075              | Gentry, MO                | 0.064                | 84.94                     | 43.89                 |
| 29077              | Greene, MO                | -0.025               | 38.46                     | 43.95                 |
| 29079              | Grundy, MO                | 0.012                | 63.2                      | 61.85                 |
| 29081              | Harrison, MO              | -0.043               | 28.11                     | 74.17                 |
| 29083              | Henry, MO                 | 0.017                | 66.35                     | 59.59                 |
| 29085              | Hickory, MO               | -0.017               | 43.62                     | 46.72                 |
| 29087              | Holt, MO                  | 0.01                 | 62.24                     | 19.59                 |
| 29089              | Howard, MO                | 0.054                | 81.73                     | 40.41                 |
| 29091              | Howell, MO                | -0.007               | 50.37                     | 67.17                 |
| 29093              | Iron, MO                  | 0.052                | 81.34                     | 78.22                 |



| <b>County FIPS</b> | <b>County Description</b> | <b>DOS-SVI Index</b> | <b>DOS-SVI Percentile</b> | <b>SVI Percentile</b> |
|--------------------|---------------------------|----------------------|---------------------------|-----------------------|
| 29095              | Jackson, MO               | -0.13                | 4.65                      | 53.54                 |
| 29097              | Jasper, MO                | -0.015               | 44.38                     | 65.64                 |
| 29099              | Jefferson, MO             | -0.015               | 44.6                      | 18.63                 |
| 29101              | Johnson, MO               | 0.144                | 95.48                     | 35.06                 |
| 29103              | Knox, MO                  | -0.031               | 34.45                     | 55.7                  |
| 29105              | Laclede, MO               | 0.077                | 88.12                     | 61.78                 |
| 29107              | Lafayette, MO             | 0.01                 | 61.89                     | 38.82                 |
| 29109              | Lawrence, MO              | 0.036                | 75.49                     | 78.66                 |
| 29111              | Lewis, MO                 | 0.118                | 93.7                      | 44.65                 |
| 29113              | Lincoln, MO               | 0.005                | 58.87                     | 29.39                 |
| 29115              | Linn, MO                  | -0.045               | 26.97                     | 27.2                  |
| 29117              | Livingston, MO            | 0.058                | 82.78                     | 37.48                 |
| 29119              | McDonald, MO              | 0.065                | 85.29                     | 86.31                 |
| 29121              | Macon, MO                 | -0.012               | 46.26                     | 58.6                  |
| 29123              | Madison, MO               | 0.09                 | 90.32                     | 47.77                 |
| 29125              | Maries, MO                | 0.049                | 80.26                     | 51.18                 |
| 29127              | Marion, MO                | 0.004                | 58.04                     | 54.59                 |
| 29129              | Mercer, MO                | 0.079                | 88.51                     | 30.45                 |
| 29131              | Miller, MO                | -0.03                | 35.21                     | 50.1                  |
| 29133              | Mississippi, MO           | 0.061                | 83.92                     | 90.76                 |
| 29135              | Moniteau, MO              | 0.15                 | 95.8                      | 51.43                 |
| 29137              | Monroe, MO                | -0.013               | 45.46                     | 38.76                 |
| 29139              | Montgomery, MO            | -0.009               | 48.87                     | 53.31                 |
| 29141              | Morgan, MO                | -0.036               | 31.36                     | 62.9                  |
| 29143              | New Madrid, MO            | -0.069               | 17.32                     | 89.68                 |
| 29145              | Newton, MO                | 0.02                 | 68.04                     | 43.41                 |
| 29147              | Nodaway, MO               | 0.112                | 92.93                     | 22.2                  |
| 29149              | Oregon, MO                | -0.053               | 23.27                     | 48.85                 |
| 29151              | Osage, MO                 | 0.094                | 90.7                      | 4.97                  |
| 29153              | Ozark, MO                 | 0.017                | 66.32                     | 58.25                 |
| 29155              | Pemiscot, MO              | -0.064               | 19.23                     | 93.03                 |
| 29157              | Perry, MO                 | 0.035                | 74.53                     | 23.12                 |
| 29159              | Pettis, MO                | -0.043               | 28.08                     | 80.35                 |
| 29161              | Phelps, MO                | 0.026                | 70.61                     | 65.96                 |
| 29163              | Pike, MO                  | 0.084                | 89.27                     | 53.76                 |
| 29165              | Platte, MO                | -0.087               | 11.94                     | 9.59                  |
| 29167              | Polk, MO                  | 0.059                | 83.29                     | 59.87                 |
| 29169              | Pulaski, MO               | 0.194                | 97.55                     | 65.03                 |
| 29171              | Putnam, MO                | -0.045               | 27.12                     | 57.64                 |
| 29173              | Ralls, MO                 | 0.006                | 59.53                     | 10.45                 |
| 29175              | Randolph, MO              | 0.061                | 83.95                     | 55.54                 |
| 29177              | Ray, MO                   | -0.009               | 48.81                     | 25.73                 |
| 29179              | Reynolds, MO              | -0.001               | 54.92                     | 55.73                 |
| 29181              | Ripley, MO                | -0.043               | 28.24                     | 71.5                  |
| 29183              | St. Charles, MO           | -0.032               | 33.84                     | 3.63                  |
| 29185              | St. Clair, MO             | -0.02                | 41.48                     | 49.87                 |
| 29186              | Ste. Genevieve, MO        | -0.054               | 23.11                     | 18.85                 |
| 29187              | St. Francois, MO          | 0.087                | 89.62                     | 70.16                 |
| 29189              | St. Louis, MO             | -0.094               | 10.35                     | 26.11                 |
| 29195              | Saline, MO                | 0                    | 55.59                     | 81.62                 |
| 29197              | Schuyler, MO              | 0.019                | 67.43                     | 38.31                 |
| 29199              | Scotland, MO              | 0.112                | 93                        | 53.03                 |
| 29201              | Scott, MO                 | -0.032               | 33.59                     | 78.44                 |
| 29203              | Shannon, MO               | -0.022               | 40.69                     | 64.49                 |
| 29205              | Shelby, MO                | 0.049                | 80.36                     | 39.84                 |

| <b>County FIPS</b> | <b>County Description</b> | <b>DOS-SVI Index</b> | <b>DOS-SVI Percentile</b> | <b>SVI Percentile</b> |
|--------------------|---------------------------|----------------------|---------------------------|-----------------------|
| 29207              | Stoddard, MO              | -0.001               | 54.41                     | 46.43                 |
| 29209              | Stone, MO                 | 0.01                 | 61.99                     | 34.87                 |
| 29211              | Sullivan, MO              | -0.005               | 51.1                      | 62.96                 |
| 29213              | Taney, MO                 | -0.077               | 14.61                     | 82.17                 |
| 29215              | Texas, MO                 | 0.016                | 65.87                     | 83.03                 |
| 29217              | Vernon, MO                | 0.056                | 82.3                      | 45.1                  |
| 29219              | Warren, MO                | 0.092                | 90.51                     | 38.41                 |
| 29221              | Washington, MO            | 0.063                | 84.56                     | 79.04                 |
| 29223              | Wayne, MO                 | 0.042                | 77.68                     | 76.46                 |
| 29225              | Webster, MO               | 0.135                | 94.97                     | 63.85                 |
| 29227              | Worth, MO                 | -0.027               | 36.93                     | 22.39                 |
| 29229              | Wright, MO                | 0.032                | 73.22                     | 90.06                 |
| 29510              | St. Louis City, MO        | -0.109               | 7.51                      | 77.96                 |
| 30001              | Beaverhead, MT            | 0.097                | 91.31                     | 25.16                 |
| 30003              | Big Horn, MT              | 0.44                 | 99.59                     | 82.74                 |
| 30005              | Blaine, MT                | 0.158                | 96.15                     | 91.5                  |
| 30007              | Broadwater, MT            | 0.004                | 57.91                     | 4.2                   |
| 30009              | Carbon, MT                | -0.025               | 38.14                     | 4.33                  |
| 30011              | Carter, MT                | 0.048                | 79.78                     | 4.87                  |
| 30013              | Cascade, MT               | -0.008               | 49.32                     | 41.02                 |
| 30015              | Chouteau, MT              | 0.041                | 77.11                     | 47.99                 |
| 30017              | Custer, MT                | -0.033               | 32.73                     | 29.01                 |
| 30019              | Daniels, MT               | -0.034               | 32.47                     | 2.42                  |
| 30021              | Dawson, MT                | 0.086                | 89.43                     | 7.52                  |
| 30023              | Deer Lodge, MT            | 0.046                | 78.89                     | 47.17                 |
| 30025              | Fallon, MT                | 0.064                | 84.72                     | 2.17                  |
| 30027              | Fergus, MT                | 0.061                | 83.99                     | 23.76                 |
| 30029              | Flathead, MT              | 0.056                | 82.58                     | 9.24                  |
| 30031              | Gallatin, MT              | 0.053                | 81.5                      | 4.27                  |
| 30033              | Garfield, MT              | 0.125                | 94.36                     | 0.76                  |
| 30035              | Glacier, MT               | 0.101                | 91.91                     | 85.83                 |
| 30037              | Golden Valley, MT         | -0.064               | 19.13                     | 5.19                  |
| 30039              | Granite, MT               | 0.083                | 89.02                     | 7.64                  |
| 30041              | Hill, MT                  | -0.093               | 10.66                     | 69.84                 |
| 30043              | Jefferson, MT             | 0.054                | 81.89                     | 4.81                  |
| 30045              | Judith Basin, MT          | -0.044               | 27.57                     | 1.62                  |
| 30047              | Lake, MT                  | 0.003                | 57.69                     | 64.68                 |
| 30049              | Lewis and Clark, MT       | 0.01                 | 62.34                     | 12.58                 |
| 30051              | Liberty, MT               | -0.09                | 11.24                     | 40.99                 |
| 30053              | Lincoln, MT               | 0.007                | 60.24                     | 41.94                 |
| 30055              | McCone, MT                | 0.146                | 95.58                     | 7.74                  |
| 30057              | Madison, MT               | -0.014               | 44.89                     | 17.26                 |
| 30059              | Meagher, MT               | 0.018                | 66.54                     | 4.65                  |
| 30061              | Mineral, MT               | 0.001                | 55.84                     | 56.21                 |
| 30063              | Missoula, MT              | -0.002               | 53.68                     | 17.8                  |
| 30065              | Musselshell, MT           | 0.182                | 97.26                     | 35.51                 |
| 30067              | Park, MT                  | 0.025                | 69.98                     | 6.88                  |
| 30069              | Petroleum, MT             | 0.074                | 87.27                     | 0.29                  |
| 30071              | Phillips, MT              | 0.131                | 94.72                     | 41.46                 |
| 30073              | Pondera, MT               | 0.011                | 62.53                     | 82.96                 |
| 30075              | Powder River, MT          | -0.037               | 30.85                     | 3.92                  |
| 30077              | Powell, MT                | 0.279                | 98.5                      | 25.45                 |
| 30079              | Prairie, MT               | 0.033                | 73.99                     | 7.58                  |
| 30081              | Ravalli, MT               | 0.009                | 61.19                     | 18.6                  |
| 30083              | Richland, MT              | 0.059                | 83.19                     | 21.21                 |

| County FIPS | County Description | DOS-SVI Index | DOS-SVI Percentile | SVI Percentile |
|-------------|--------------------|---------------|--------------------|----------------|
| 30085       | Roosevelt, MT      | 0.105         | 92.26              | 88.79          |
| 30087       | Rosebud, MT        | 0.14          | 95.29              | 60.7           |
| 30089       | Sanders, MT        | 0.023         | 69.25              | 34.78          |
| 30091       | Sheridan, MT       | 0.085         | 89.37              | 9.49           |
| 30093       | Silver Bow, MT     | -0.001        | 54.31              | 52.58          |
| 30095       | Stillwater, MT     | 0.07          | 86.34              | 3.6            |
| 30097       | Sweet Grass, MT    | -0.011        | 46.96              | 0.86           |
| 30099       | Teton, MT          | 0.132         | 94.75              | 29.81          |
| 30101       | Toole, MT          | 0.108         | 92.52              | 47.68          |
| 30103       | Treasure, MT       | -0.009        | 48.3               | 5.67           |
| 30105       | Valley, MT         | 0.026         | 70.52              | 11.62          |
| 30107       | Wheatland, MT      | 0.059         | 83.06              | 54.36          |
| 30109       | Wibaux, MT         | -0.094        | 10.38              | 39.33          |
| 30111       | Yellowstone, MT    | 0.021         | 68.32              | 24.97          |
| 31001       | Adams, NE          | 0.02          | 67.49              | 35.92          |
| 31003       | Antelope, NE       | -0.005        | 51.45              | 10.32          |
| 31005       | Arthur, NE         | 0.02          | 67.56              | 0.83           |
| 31007       | Banner, NE         | -0.042        | 28.59              | 0.41           |
| 31009       | Blaine, NE         | 0.133         | 94.84              | 9.08           |
| 31011       | Boone, NE          | 0.052         | 81.06              | 2.83           |
| 31013       | Box Butte, NE      | -0.057        | 22.06              | 35.86          |
| 31015       | Boyd, NE           | 0.005         | 59.19              | 9.2            |
| 31017       | Brown, NE          | -0.003        | 53.3               | 12.52          |
| 31019       | Buffalo, NE        | -0.001        | 54.44              | 26.56          |
| 31021       | Burt, NE           | 0.021         | 68.26              | 25.41          |
| 31023       | Butler, NE         | 0.02          | 67.78              | 11.72          |
| 31025       | Cass, NE           | 0.033         | 73.58              | 1.08           |
| 31027       | Cedar, NE          | 0.035         | 74.5               | 1.21           |
| 31029       | Chase, NE          | -0.061        | 20.22              | 15.51          |
| 31031       | Cherry, NE         | -0.035        | 31.58              | 22.61          |
| 31033       | Cheyenne, NE       | 0.036         | 75.52              | 12.1           |
| 31035       | Clay, NE           | -0.01         | 47.95              | 16.46          |
| 31037       | Colfax, NE         | -0.095        | 10.16              | 51.88          |
| 31039       | Cuming, NE         | -0.028        | 36.39              | 19.36          |
| 31041       | Custer, NE         | -0.008        | 49.38              | 18.18          |
| 31043       | Dakota, NE         | -0.098        | 9.71               | 86.15          |
| 31045       | Dawes, NE          | 0.1           | 91.75              | 17.17          |
| 31047       | Dawson, NE         | -0.15         | 3.53               | 79.33          |
| 31049       | Deuel, NE          | -0.058        | 21.43              | 16.5           |
| 31051       | Dixon, NE          | -0.022        | 40.34              | 37.9           |
| 31053       | Dodge, NE          | -0.049        | 25.25              | 56.91          |
| 31055       | Douglas, NE        | -0.137        | 4.17               | 46.69          |
| 31057       | Dundy, NE          | -0.097        | 9.93               | 30.38          |
| 31059       | Fillmore, NE       | -0.016        | 44.22              | 6.18           |
| 31061       | Franklin, NE       | -0.029        | 35.72              | 7.68           |
| 31063       | Frontier, NE       | 0.028         | 71.57              | 9.94           |
| 31065       | Furnas, NE         | -0.023        | 39.35              | 18.25          |
| 31067       | Gage, NE           | -0.022        | 40.08              | 11.05          |
| 31069       | Garden, NE         | 0.029         | 71.73              | 1.43           |
| 31071       | Garfield, NE       | -0.021        | 41.04              | 4.3            |
| 31073       | Gosper, NE         | 0.043         | 78.16              | 0.51           |
| 31075       | Grant, NE          | 0.092         | 90.48              | 13.28          |
| 31077       | Greeley, NE        | 0.041         | 77.08              | 4.11           |
| 31079       | Hall, NE           | -0.127        | 4.93               | 67.01          |
| 31081       | Hamilton, NE       | -0.009        | 48.55              | 0.89           |

| <b>County FIPS</b> | <b>County Description</b> | <b>DOS-SVI Index</b> | <b>DOS-SVI Percentile</b> | <b>SVI Percentile</b> |
|--------------------|---------------------------|----------------------|---------------------------|-----------------------|
| 31083              | Harlan, NE                | -0.024               | 38.71                     | 12.39                 |
| 31085              | Hayes, NE                 | -0.059               | 21.36                     | 4.36                  |
| 31087              | Hitchcock, NE             | -0.003               | 53.36                     | 19.43                 |
| 31089              | Holt, NE                  | 0.016                | 65.84                     | 9.81                  |
| 31091              | Hooker, NE                | 0                    | 55.56                     | 14.68                 |
| 31093              | Howard, NE                | -0.03                | 34.58                     | 8.03                  |
| 31095              | Jefferson, NE             | -0.092               | 10.95                     | 21.85                 |
| 31097              | Johnson, NE               | 0.163                | 96.4                      | 57.77                 |
| 31099              | Kearney, NE               | 0.064                | 84.69                     | 9.39                  |
| 31101              | Keith, NE                 | -0.007               | 50.33                     | 22.68                 |
| 31103              | Keya Paha, NE             | 0.02                 | 67.53                     | 0.1                   |
| 31105              | Kimball, NE               | -0.032               | 33.56                     | 56.11                 |
| 31107              | Knox, NE                  | 0.101                | 91.98                     | 32.77                 |
| 31109              | Lancaster, NE             | -0.064               | 19.1                      | 30.25                 |
| 31111              | Lincoln, NE               | -0.016               | 44.25                     | 36.75                 |
| 31113              | Logan, NE                 | 0.121                | 93.92                     | 10.73                 |
| 31115              | Loup, NE                  | -0.021               | 41.39                     | 0.45                  |
| 31117              | McPherson, NE             | 0.166                | 96.47                     | 8.38                  |
| 31119              | Madison, NE               | -0.056               | 22.45                     | 51.05                 |
| 31121              | Merrick, NE               | 0.064                | 84.97                     | 19.75                 |
| 31123              | Morrill, NE               | -0.041               | 29.13                     | 42.2                  |
| 31125              | Nance, NE                 | -0.025               | 38.08                     | 8.25                  |
| 31127              | Nemaha, NE                | 0.019                | 66.98                     | 16.59                 |
| 31129              | Nuckolls, NE              | -0.022               | 40.81                     | 17.36                 |
| 31131              | Otoe, NE                  | -0.036               | 31.42                     | 22.87                 |
| 31133              | Pawnee, NE                | 0.074                | 87.2                      | 23.18                 |
| 31135              | Perkins, NE               | 0.011                | 62.4                      | 5.38                  |
| 31137              | Phelps, NE                | -0.002               | 53.52                     | 12.26                 |
| 31139              | Pierce, NE                | 0.014                | 64.22                     | 2.29                  |
| 31141              | Platte, NE                | -0.022               | 40.59                     | 29.94                 |
| 31143              | Polk, NE                  | 0.078                | 88.41                     | 19.08                 |
| 31145              | Red Willow, NE            | -0.032               | 33.65                     | 23.73                 |
| 31147              | Richardson, NE            | -0.049               | 25.18                     | 10.25                 |
| 31149              | Rock, NE                  | 0.02                 | 67.97                     | 0.92                  |
| 31151              | Saline, NE                | -0.03                | 34.67                     | 59.78                 |
| 31153              | Sarpy, NE                 | -0.053               | 23.4                      | 9.71                  |
| 31155              | Saunders, NE              | -0.01                | 47.72                     | 4.24                  |
| 31157              | Scotts Bluff, NE          | -0.107               | 8.05                      | 56.75                 |
| 31159              | Seward, NE                | 0.056                | 82.33                     | 4.68                  |
| 31161              | Sheridan, NE              | 0.039                | 76.47                     | 59.68                 |
| 31163              | Sherman, NE               | -0.003               | 52.85                     | 7.39                  |
| 31165              | Sioux, NE                 | 0.007                | 59.95                     | 1.78                  |
| 31167              | Stanton, NE               | -0.038               | 30.75                     | 5.7                   |
| 31169              | Thayer, NE                | 0.013                | 63.99                     | 5.8                   |
| 31171              | Thomas, NE                | -0.046               | 26.33                     | 0.35                  |
| 31173              | Thurston, NE              | 0.28                 | 98.57                     | 88.66                 |
| 31175              | Valley, NE                | -0.015               | 44.54                     | 14.84                 |
| 31177              | Washington, NE            | -0.004               | 52.15                     | 3.79                  |
| 31179              | Wayne, NE                 | 0.125                | 94.33                     | 8.47                  |
| 31181              | Webster, NE               | -0.008               | 49.54                     | 10.92                 |
| 31183              | Wheeler, NE               | -0.01                | 47.56                     | 0.48                  |
| 31185              | York, NE                  | 0.009                | 61.38                     | 18.28                 |
| 32001              | Churchill, NV             | 0.013                | 63.58                     | 60.48                 |
| 32003              | Clark, NV                 | -0.143               | 3.95                      | 74.04                 |
| 32005              | Douglas, NV               | -0.029               | 35.63                     | 17.93                 |

| <b>County FIPS</b> | <b>County Description</b> | <b>DOS-SVI Index</b> | <b>DOS-SVI Percentile</b> | <b>SVI Percentile</b> |
|--------------------|---------------------------|----------------------|---------------------------|-----------------------|
| 32007              | Elko, NV                  | -0.012               | 46.13                     | 51.78                 |
| 32009              | Esmeralda, NV             | 0.004                | 58.36                     | 63.95                 |
| 32011              | Eureka, NV                | 0.04                 | 76.82                     | 6.75                  |
| 32013              | Humboldt, NV              | 0.013                | 63.77                     | 58.69                 |
| 32015              | Lander, NV                | 0.062                | 84.18                     | 82.61                 |
| 32017              | Lincoln, NV               | 0.105                | 92.3                      | 42.13                 |
| 32019              | Lyon, NV                  | 0.015                | 65.14                     | 57.83                 |
| 32021              | Mineral, NV               | 0.066                | 85.51                     | 88.15                 |
| 32023              | Nye, NV                   | 0.026                | 70.45                     | 73.09                 |
| 32027              | Pershing, NV              | 0.398                | 99.43                     | 90.38                 |
| 32029              | Storey, NV                | -0.104               | 8.47                      | 7.17                  |
| 32031              | Washoe, NV                | -0.04                | 29.32                     | 52.71                 |
| 32033              | White Pine, NV            | 0.17                 | 96.69                     | 37.42                 |
| 32510              | Carson City, NV           | -0.06                | 20.5                      | 84.43                 |
| 33001              | Belknap, NH               | 0.01                 | 62.18                     | 8.41                  |
| 33003              | Carroll, NH               | 0.007                | 59.85                     | 5.83                  |
| 33005              | Cheshire, NH              | 0.013                | 63.64                     | 14.17                 |
| 33007              | Coos, NH                  | 0.033                | 73.96                     | 52.9                  |
| 33009              | Grafton, NH               | 0.04                 | 76.98                     | 18.82                 |
| 33011              | Hillsborough, NH          | -0.072               | 16.14                     | 19.11                 |
| 33013              | Merrimack, NH             | -0.001               | 54.25                     | 14.55                 |
| 33015              | Rockingham, NH            | -0.038               | 30.15                     | 1.11                  |
| 33017              | Strafford, NH             | 0.049                | 79.97                     | 17.48                 |
| 33019              | Sullivan, NH              | -0.049               | 25.12                     | 15.13                 |
| 34001              | Atlantic, NJ              | -0.116               | 6.46                      | 79.11                 |
| 34003              | Bergen, NJ                | -0.113               | 6.88                      | 23.95                 |
| 34005              | Burlington, NJ            | -0.039               | 29.77                     | 20.54                 |
| 34007              | Camden, NJ                | -0.142               | 3.98                      | 61.18                 |
| 34009              | Cape May, NJ              | 0.012                | 63.01                     | 33.98                 |
| 34011              | Cumberland, NJ            | -0.1                 | 9.17                      | 95.92                 |
| 34013              | Essex, NJ                 | -0.112               | 7                         | 84.04                 |
| 34015              | Gloucester, NJ            | -0.022               | 40.24                     | 16.75                 |
| 34017              | Hudson, NJ                | -0.07                | 16.52                     | 64.24                 |
| 34019              | Hunterdon, NJ             | 0.014                | 64.34                     | 2.64                  |
| 34021              | Mercer, NJ                | -0.115               | 6.56                      | 55.8                  |
| 34023              | Middlesex, NJ             | -0.059               | 21.39                     | 46.59                 |
| 34025              | Monmouth, NJ              | -0.063               | 19.61                     | 16.05                 |
| 34027              | Morris, NJ                | -0.066               | 17.99                     | 12.01                 |
| 34029              | Ocean, NJ                 | 0.038                | 75.96                     | 33.54                 |
| 34031              | Passaic, NJ               | -0.045               | 27.09                     | 77.64                 |
| 34033              | Salem, NJ                 | -0.069               | 17.1                      | 59.01                 |
| 34035              | Somerset, NJ              | -0.076               | 15.03                     | 10                    |
| 34037              | Sussex, NJ                | 0.017                | 66.38                     | 1.91                  |
| 34039              | Union, NJ                 | -0.149               | 3.6                       | 62.32                 |
| 34041              | Warren, NJ                | -0.031               | 34.13                     | 21.78                 |
| 35001              | Bernalillo, NM            | -0.166               | 2.48                      | 68.28                 |
| 35003              | Catron, NM                | -0.124               | 5.38                      | 33.57                 |
| 35005              | Chaves, NM                | -0.167               | 2.39                      | 95.51                 |
| 35006              | Cibola, NM                | 0.141                | 95.35                     | 99.84                 |
| 35007              | Colfax, NM                | -0.059               | 21.01                     | 96.27                 |
| 35009              | Curry, NM                 | -0.125               | 5.19                      | 87.74                 |
| 35011              | De Baca, NM               | -0.024               | 39.03                     | 69.39                 |
| 35013              | Doña Ana, NM              | -0.167               | 2.36                      | 98.41                 |
| 35015              | Eddy, NM                  | -0.046               | 26.58                     | 70.32                 |
| 35017              | Grant, NM                 | -0.053               | 23.59                     | 92.96                 |

| <b>County FIPS</b> | <b>County Description</b> | <b>DOS-SVI Index</b> | <b>DOS-SVI Percentile</b> | <b>SVI Percentile</b> |
|--------------------|---------------------------|----------------------|---------------------------|-----------------------|
| 35019              | Guadalupe, NM             | -0.032               | 33.78                     | 95.29                 |
| 35021              | Harding, NM               | -0.054               | 22.89                     | 36.15                 |
| 35023              | Hidalgo, NM               | -0.118               | 6.21                      | 96.31                 |
| 35025              | Lea, NM                   | -0.07                | 16.55                     | 92.17                 |
| 35027              | Lincoln, NM               | -0.055               | 22.6                      | 47.96                 |
| 35028              | Los Alamos, NM            | -0.047               | 26.11                     | 2.48                  |
| 35029              | Luna, NM                  | -0.232               | 0.67                      | 99.9                  |
| 35031              | McKinley, NM              | 0.273                | 98.44                     | 98.89                 |
| 35033              | Mora, NM                  | -0.029               | 35.44                     | 79.59                 |
| 35035              | Otero, NM                 | -0.04                | 29.35                     | 91.4                  |
| 35037              | Quay, NM                  | -0.176               | 2.04                      | 80.96                 |
| 35041              | Roosevelt, NM             | -0.02                | 41.77                     | 94.3                  |
| 35043              | Sandoval, NM              | -0.032               | 33.68                     | 48.18                 |
| 35045              | San Juan, NM              | 0.064                | 85                        | 91.94                 |
| 35047              | San Miguel, NM            | -0.226               | 0.76                      | 98.63                 |
| 35049              | Santa Fe, NM              | -0.139               | 4.04                      | 52.55                 |
| 35051              | Sierra, NM                | -0.174               | 2.07                      | 91.46                 |
| 35053              | Socorro, NM               | -0.109               | 7.61                      | 97.45                 |
| 35055              | Taos, NM                  | -0.104               | 8.5                       | 85.86                 |
| 35057              | Torrance, NM              | 0.009                | 61.06                     | 74.9                  |
| 35059              | Union, NM                 | -0.005               | 51.48                     | 67.93                 |
| 35061              | Valencia, NM              | -0.085               | 12.22                     | 90.41                 |
| 36001              | Albany, NY                | -0.001               | 54.6                      | 30.41                 |
| 36003              | Allegany, NY              | 0.121                | 93.95                     | 58.18                 |
| 36005              | Bronx, NY                 | -0.088               | 11.78                     | 99.27                 |
| 36007              | Broome, NY                | 0.024                | 69.56                     | 61.66                 |
| 36009              | Cattaraugus, NY           | 0.055                | 82.01                     | 72.83                 |
| 36011              | Cayuga, NY                | -0.002               | 54.03                     | 50.25                 |
| 36013              | Chautauqua, NY            | 0.02                 | 67.69                     | 72.48                 |
| 36015              | Chemung, NY               | -0.001               | 54.16                     | 48.5                  |
| 36017              | Chenango, NY              | 0.031                | 72.94                     | 56.46                 |
| 36019              | Clinton, NY               | 0.052                | 81.28                     | 53.12                 |
| 36021              | Columbia, NY              | -0.004               | 52.02                     | 38.54                 |
| 36023              | Cortland, NY              | 0.053                | 81.57                     | 34.52                 |
| 36025              | Delaware, NY              | 0.066                | 85.45                     | 63.31                 |
| 36027              | Dutchess, NY              | 0.094                | 90.86                     | 42.07                 |
| 36029              | Erie, NY                  | -0.023               | 39.48                     | 41.4                  |
| 36031              | Essex, NY                 | 0.087                | 89.75                     | 38.69                 |
| 36033              | Franklin, NY              | 0.093                | 90.54                     | 70.73                 |
| 36035              | Fulton, NY                | -0.043               | 28.18                     | 50.1                  |
| 36037              | Genesee, NY               | -0.01                | 47.63                     | 18.79                 |
| 36039              | Greene, NY                | 0.097                | 91.25                     | 41.59                 |
| 36041              | Hamilton, NY              | 0.013                | 63.71                     | 38.98                 |
| 36043              | Herkimer, NY              | 0.039                | 76.69                     | 53.22                 |
| 36045              | Jefferson, NY             | 0.052                | 81.31                     | 64.84                 |
| 36047              | Kings, NY                 | 0.244                | 98.28                     | 81.53                 |
| 36049              | Lewis, NY                 | 0.021                | 68.42                     | 29.11                 |
| 36051              | Livingston, NY            | 0.096                | 91.12                     | 34.24                 |
| 36053              | Madison, NY               | 0.075                | 87.46                     | 16.66                 |
| 36055              | Monroe, NY                | -0.074               | 15.6                      | 52.04                 |
| 36057              | Montgomery, NY            | -0.01                | 48.01                     | 83.06                 |
| 36059              | Nassau, NY                | -0.044               | 27.83                     | 24.3                  |
| 36061              | New York, NY              | 0.024                | 69.63                     | 55.1                  |
| 36063              | Niagara, NY               | -0.029               | 35.4                      | 33.18                 |
| 36065              | Oneida, NY                | -0.014               | 44.8                      | 69.46                 |

| <b>County FIPS</b> | <b>County Description</b> | <b>DOS-SVI Index</b> | <b>DOS-SVI Percentile</b> | <b>SVI Percentile</b> |
|--------------------|---------------------------|----------------------|---------------------------|-----------------------|
| 36067              | Onondaga, NY              | -0.043               | 28.21                     | 52.07                 |
| 36069              | Ontario, NY               | -0.01                | 48.2                      | 23.15                 |
| 36071              | Orange, NY                | 0.038                | 76.12                     | 55.38                 |
| 36073              | Orleans, NY               | 0.05                 | 80.58                     | 64.3                  |
| 36075              | Oswego, NY                | 0.039                | 76.6                      | 64.97                 |
| 36077              | Otsego, NY                | 0.137                | 95.16                     | 42.36                 |
| 36079              | Putnam, NY                | 0.028                | 71.38                     | 8.12                  |
| 36081              | Queens, NY                | 0.07                 | 86.37                     | 62.01                 |
| 36083              | Rensselaer, NY            | -0.012               | 46.64                     | 34.3                  |
| 36085              | Richmond, NY              | 0.054                | 81.76                     | 47.64                 |
| 36087              | Rockland, NY              | 0.09                 | 90.19                     | 60.38                 |
| 36089              | St. Lawrence, NY          | 0.104                | 92.14                     | 74.75                 |
| 36091              | Saratoga, NY              | -0.021               | 41.32                     | 4.75                  |
| 36093              | Schenectady, NY           | -0.012               | 46.1                      | 39.43                 |
| 36095              | Schoharie, NY             | -0.012               | 46.61                     | 40.13                 |
| 36097              | Schuyler, NY              | 0.033                | 73.86                     | 36.91                 |
| 36099              | Seneca, NY                | 0.052                | 80.96                     | 44.9                  |
| 36101              | Steuben, NY               | 0.001                | 56.64                     | 46.91                 |
| 36103              | Suffolk, NY               | -0.004               | 52.28                     | 21.46                 |
| 36105              | Sullivan, NY              | 0.035                | 74.98                     | 79.39                 |
| 36107              | Tioga, NY                 | 0.01                 | 61.95                     | 19.94                 |
| 36109              | Tompkins, NY              | 0.125                | 94.4                      | 34.62                 |
| 36111              | Ulster, NY                | 0.029                | 71.86                     | 47.04                 |
| 36113              | Warren, NY                | 0.004                | 58.2                      | 17.42                 |
| 36115              | Washington, NY            | 0.056                | 82.36                     | 40                    |
| 36117              | Wayne, NY                 | -0.003               | 53.26                     | 34.14                 |
| 36119              | Westchester, NY           | -0.098               | 9.62                      | 55.16                 |
| 36121              | Wyoming, NY               | 0.059                | 83.22                     | 31.21                 |
| 36123              | Yates, NY                 | 0.151                | 95.89                     | 43.92                 |
| 37001              | Alamance, NC              | -0.101               | 8.98                      | 78.38                 |
| 37003              | Alexander, NC             | 0.06                 | 83.38                     | 63.41                 |
| 37005              | Alleghany, NC             | -0.131               | 4.52                      | 62.68                 |
| 37007              | Anson, NC                 | 0.064                | 84.75                     | 94.43                 |
| 37009              | Ashe, NC                  | -0.064               | 19.07                     | 49.94                 |
| 37011              | Avery, NC                 | 0.128                | 94.56                     | 64.46                 |
| 37013              | Beaufort, NC              | -0.06                | 20.95                     | 71.56                 |
| 37015              | Bertie, NC                | 0.03                 | 72.43                     | 93.85                 |
| 37017              | Bladen, NC                | -0.075               | 15.22                     | 94.46                 |
| 37019              | Brunswick, NC             | -0.036               | 31.23                     | 35.83                 |
| 37021              | Buncombe, NC              | 0.028                | 71.7                      | 37.99                 |
| 37023              | Burke, NC                 | 0.031                | 72.81                     | 84.87                 |
| 37025              | Cabarrus, NC              | 0.013                | 63.87                     | 41.75                 |
| 37027              | Caldwell, NC              | -0.039               | 29.74                     | 65.1                  |
| 37029              | Camden, NC                | -0.056               | 22.41                     | 30.7                  |
| 37031              | Carteret, NC              | -0.079               | 14.04                     | 42.55                 |
| 37033              | Caswell, NC               | 0.033                | 73.7                      | 83.6                  |
| 37035              | Catawba, NC               | -0.013               | 45.43                     | 64.81                 |
| 37037              | Chatham, NC               | -0.076               | 14.96                     | 38.09                 |
| 37039              | Cherokee, NC              | 0.036                | 75.26                     | 48.69                 |
| 37041              | Chowan, NC                | -0.029               | 35.59                     | 81.18                 |
| 37043              | Clay, NC                  | -0.018               | 43.27                     | 21.91                 |
| 37045              | Cleveland, NC             | -0.015               | 44.48                     | 83.5                  |
| 37047              | Columbus, NC              | -0.027               | 36.68                     | 94.81                 |
| 37049              | Craven, NC                | 0                    | 55.4                      | 80.99                 |
| 37051              | Cumberland, NC            | -0.097               | 9.77                      | 86.4                  |

| <b>County FIPS</b> | <b>County Description</b> | <b>DOS-SVI Index</b> | <b>DOS-SVI Percentile</b> | <b>SVI Percentile</b> |
|--------------------|---------------------------|----------------------|---------------------------|-----------------------|
| 37053              | Currituck, NC             | 0.001                | 56.48                     | 11.94                 |
| 37055              | Dare, NC                  | 0.019                | 66.95                     | 14.49                 |
| 37057              | Davidson, NC              | -0.018               | 43.43                     | 68.41                 |
| 37059              | Davie, NC                 | -0.018               | 43.17                     | 44.11                 |
| 37061              | Duplin, NC                | -0.055               | 22.64                     | 97.9                  |
| 37063              | Durham, NC                | -0.178               | 1.85                      | 61.97                 |
| 37065              | Edgecombe, NC             | -0.111               | 7.23                      | 97.26                 |
| 37067              | Forsyth, NC               | -0.122               | 5.73                      | 68.34                 |
| 37069              | Franklin, NC              | -0.016               | 44.16                     | 63.76                 |
| 37071              | Gaston, NC                | -0.033               | 32.98                     | 67.2                  |
| 37073              | Gates, NC                 | -0.011               | 47.47                     | 35.67                 |
| 37075              | Graham, NC                | 0.012                | 62.94                     | 63.38                 |
| 37077              | Granville, NC             | -0.065               | 18.82                     | 65.61                 |
| 37079              | Greene, NC                | -0.012               | 46.32                     | 99.24                 |
| 37081              | Guilford, NC              | -0.132               | 4.36                      | 63.69                 |
| 37083              | Halifax, NC               | -0.123               | 5.44                      | 96.46                 |
| 37085              | Harnett, NC               | -0.003               | 53.23                     | 78.69                 |
| 37087              | Haywood, NC               | -0.037               | 30.98                     | 28.09                 |
| 37089              | Henderson, NC             | -0.022               | 40.53                     | 32.1                  |
| 37091              | Hertford, NC              | -0.026               | 37.41                     | 98.73                 |
| 37093              | Hoke, NC                  | -0.067               | 17.8                      | 89.24                 |
| 37095              | Hyde, NC                  | 0.089                | 90.16                     | 86.27                 |
| 37097              | Iredell, NC               | -0.032               | 33.17                     | 37.45                 |
| 37099              | Jackson, NC               | 0.049                | 80.33                     | 62.36                 |
| 37101              | Johnston, NC              | -0.064               | 19.2                      | 53.95                 |
| 37103              | Jones, NC                 | -0.034               | 32.12                     | 87.61                 |
| 37105              | Lee, NC                   | -0.077               | 14.55                     | 84.81                 |
| 37107              | Lenoir, NC                | -0.064               | 19.01                     | 99.33                 |
| 37109              | Lincoln, NC               | -0.02                | 41.83                     | 35.64                 |
| 37111              | McDowell, NC              | 0.011                | 62.72                     | 78.95                 |
| 37113              | Macon, NC                 | -0.009               | 48.39                     | 35.48                 |
| 37115              | Madison, NC               | 0.056                | 82.43                     | 45.86                 |
| 37117              | Martin, NC                | -0.108               | 7.83                      | 75.41                 |
| 37119              | Mecklenburg, NC           | -0.21                | 1.08                      | 44.08                 |
| 37121              | Mitchell, NC              | -0.025               | 37.79                     | 42.23                 |
| 37123              | Montgomery, NC            | 0.021                | 68.16                     | 87.13                 |
| 37125              | Moore, NC                 | -0.024               | 38.52                     | 36.21                 |
| 37127              | Nash, NC                  | -0.042               | 28.49                     | 82.87                 |
| 37129              | New Hanover, NC           | -0.096               | 10.09                     | 37.71                 |
| 37131              | Northampton, NC           | -0.126               | 5                         | 90.22                 |
| 37133              | Onslow, NC                | 0.06                 | 83.54                     | 74.65                 |
| 37135              | Orange, NC                | -0.023               | 39.64                     | 29.59                 |
| 37137              | Pamlico, NC               | 0.099                | 91.59                     | 71.62                 |
| 37139              | Pasquotank, NC            | -0.012               | 46.16                     | 77.48                 |
| 37141              | Pender, NC                | 0.034                | 74.28                     | 54.78                 |
| 37143              | Perquimans, NC            | -0.023               | 40.02                     | 50.48                 |
| 37145              | Person, NC                | 0.006                | 59.5                      | 77.32                 |
| 37147              | Pitt, NC                  | -0.09                | 11.21                     | 82.42                 |
| 37149              | Polk, NC                  | 0.038                | 76.28                     | 38.25                 |
| 37151              | Randolph, NC              | -0.061               | 20.15                     | 69.65                 |
| 37153              | Richmond, NC              | -0.06                | 20.66                     | 97.96                 |
| 37155              | Robeson, NC               | -0.07                | 16.65                     | 99.11                 |
| 37157              | Rockingham, NC            | -0.038               | 30.34                     | 78.57                 |
| 37159              | Rowan, NC                 | -0.027               | 36.52                     | 81.43                 |
| 37161              | Rutherford, NC            | -0.017               | 43.87                     | 75.51                 |



| <b>County FIPS</b> | <b>County Description</b> | <b>DOS-SVI Index</b> | <b>DOS-SVI Percentile</b> | <b>SVI Percentile</b> |
|--------------------|---------------------------|----------------------|---------------------------|-----------------------|
| 37163              | Sampson, NC               | -0.068               | 17.41                     | 97.23                 |
| 37165              | Scotland, NC              | 0.046                | 79.27                     | 99.36                 |
| 37167              | Stanly, NC                | 0.042                | 77.62                     | 63.25                 |
| 37169              | Stokes, NC                | -0.025               | 38.01                     | 30.67                 |
| 37171              | Surry, NC                 | -0.018               | 43.11                     | 72.58                 |
| 37173              | Swain, NC                 | -0.004               | 52.72                     | 77.74                 |
| 37175              | Transylvania, NC          | 0.023                | 69.02                     | 39.75                 |
| 37177              | Tyrrell, NC               | 0.09                 | 90.39                     | 87.64                 |
| 37179              | Union, NC                 | 0.018                | 66.89                     | 18.73                 |
| 37181              | Vance, NC                 | -0.065               | 18.78                     | 97.87                 |
| 37183              | Wake, NC                  | -0.114               | 6.69                      | 27.74                 |
| 37185              | Warren, NC                | -0.038               | 30.4                      | 89.43                 |
| 37187              | Washington, NC            | -0.165               | 2.55                      | 87.87                 |
| 37189              | Watauga, NC               | 0.062                | 84.21                     | 41.21                 |
| 37191              | Wayne, NC                 | -0.099               | 9.42                      | 95.03                 |
| 37193              | Wilkes, NC                | -0.05                | 24.45                     | 69.24                 |
| 37195              | Wilson, NC                | -0.069               | 17.16                     | 93.6                  |
| 37197              | Yadkin, NC                | -0.025               | 37.92                     | 64.04                 |
| 37199              | Yancey, NC                | -0.027               | 36.96                     | 57.36                 |
| 38001              | Adams, ND                 | 0.005                | 58.64                     | 2.99                  |
| 38003              | Barnes, ND                | -0.003               | 53.07                     | 12.45                 |
| 38005              | Benson, ND                | 0.077                | 87.9                      | 84.33                 |
| 38007              | Billings, ND              | 0.029                | 72.11                     | 3.12                  |
| 38009              | Bottineau, ND             | 0.031                | 72.72                     | 6.91                  |
| 38011              | Bowman, ND                | 0.072                | 86.63                     | 17.55                 |
| 38013              | Burke, ND                 | 0.121                | 94.02                     | 0.7                   |
| 38015              | Burleigh, ND              | -0.065               | 18.66                     | 17.39                 |
| 38017              | Cass, ND                  | -0.201               | 1.24                      | 14.27                 |
| 38019              | Cavalier, ND              | 0.018                | 66.86                     | 1.72                  |
| 38021              | Dickey, ND                | 0.098                | 91.47                     | 11.59                 |
| 38023              | Divide, ND                | -0.048               | 25.53                     | 3.34                  |
| 38025              | Dunn, ND                  | 0.06                 | 83.57                     | 22.26                 |
| 38027              | Eddy, ND                  | -0.134               | 4.3                       | 29.04                 |
| 38029              | Emmons, ND                | -0.058               | 21.78                     | 9.55                  |
| 38031              | Foster, ND                | 0.04                 | 76.95                     | 1.75                  |
| 38033              | Golden Valley, ND         | 0.075                | 87.42                     | 9.3                   |
| 38035              | Grand Forks, ND           | -0.119               | 6.05                      | 30.29                 |
| 38037              | Grant, ND                 | 0.063                | 84.5                      | 7.1                   |
| 38039              | Griggs, ND                | -0.079               | 13.91                     | 7.32                  |
| 38041              | Hettinger, ND             | -0.033               | 32.63                     | 5.61                  |
| 38043              | Kidder, ND                | 0.026                | 70.55                     | 2.9                   |
| 38045              | LaMoure, ND               | -0.012               | 46.29                     | 4.43                  |
| 38047              | Logan, ND                 | 0.081                | 88.76                     | 3.82                  |
| 38049              | McHenry, ND               | -0.035               | 32                        | 2.96                  |
| 38051              | McIntosh, ND              | -0.1                 | 9.14                      | 10.61                 |
| 38053              | McKenzie, ND              | 0.087                | 89.69                     | 39.2                  |
| 38055              | McLean, ND                | 0.011                | 62.5                      | 8.34                  |
| 38057              | Mercer, ND                | 0.019                | 67.08                     | 10.16                 |
| 38059              | Morton, ND                | 0.005                | 59.09                     | 10.35                 |
| 38061              | Mountrail, ND             | 0.101                | 91.88                     | 37.58                 |
| 38063              | Nelson, ND                | 0.009                | 61.03                     | 3.5                   |
| 38065              | Oliver, ND                | -0.022               | 40.85                     | 21.08                 |
| 38067              | Pembina, ND               | 0.01                 | 61.76                     | 4.17                  |
| 38069              | Pierce, ND                | -0.063               | 19.58                     | 19.14                 |
| 38071              | Ramsey, ND                | -0.058               | 21.71                     | 35.32                 |

| <b>County FIPS</b> | <b>County Description</b> | <b>DOS-SVI Index</b> | <b>DOS-SVI Percentile</b> | <b>SVI Percentile</b> |
|--------------------|---------------------------|----------------------|---------------------------|-----------------------|
| 38073              | Ransom, ND                | -0.085               | 12.29                     | 8.57                  |
| 38075              | Renville, ND              | 0.056                | 82.49                     | 2.8                   |
| 38077              | Richland, ND              | -0.022               | 40.78                     | 12.17                 |
| 38079              | Rolette, ND               | -0.094               | 10.44                     | 90.7                  |
| 38081              | Sargent, ND               | -0.006               | 50.52                     | 2.32                  |
| 38083              | Sheridan, ND              | -0.078               | 14.39                     | 7.42                  |
| 38085              | Sioux, ND                 | 0.214                | 98.03                     | 88.44                 |
| 38087              | Slope, ND                 | -0.045               | 27.41                     | 1.37                  |
| 38089              | Stark, ND                 | -0.013               | 45.56                     | 21.4                  |
| 38091              | Steele, ND                | 0.051                | 80.83                     | 0.19                  |
| 38093              | Stutsman, ND              | 0.009                | 60.97                     | 24.24                 |
| 38095              | Towner, ND                | 0.078                | 88.35                     | 19.46                 |
| 38097              | Traill, ND                | 0.01                 | 62.08                     | 9.27                  |
| 38099              | Walsh, ND                 | -0.042               | 28.62                     | 36.82                 |
| 38101              | Ward, ND                  | -0.02                | 41.74                     | 16.78                 |
| 38103              | Wells, ND                 | 0.001                | 56.41                     | 6.11                  |
| 38105              | Williams, ND              | -0.113               | 6.91                      | 25.1                  |
| 39001              | Adams, OH                 | -0.021               | 41.36                     | 77.04                 |
| 39003              | Allen, OH                 | -0.045               | 26.81                     | 57.93                 |
| 39005              | Ashland, OH               | 0.052                | 80.99                     | 43.34                 |
| 39007              | Ashtabula, OH             | 0.014                | 64.72                     | 78.57                 |
| 39009              | Athens, OH                | 0.119                | 93.82                     | 73.25                 |
| 39011              | Auglaize, OH              | 0.003                | 57.72                     | 5.35                  |
| 39013              | Belmont, OH               | 0.013                | 64.06                     | 35.96                 |
| 39015              | Brown, OH                 | 0.003                | 57.47                     | 40.48                 |
| 39017              | Butler, OH                | -0.053               | 23.53                     | 36.18                 |
| 39019              | Carroll, OH               | 0.013                | 63.67                     | 15.38                 |
| 39021              | Champaign, OH             | 0.005                | 59.15                     | 29.78                 |
| 39023              | Clark, OH                 | -0.066               | 18.15                     | 72.71                 |
| 39025              | Clermont, OH              | -0.052               | 23.85                     | 10.29                 |
| 39027              | Clinton, OH               | 0.002                | 56.77                     | 44.24                 |
| 39029              | Columbiana, OH            | 0.045                | 78.8                      | 48.54                 |
| 39031              | Coshocton, OH             | 0.077                | 87.71                     | 62.07                 |
| 39033              | Crawford, OH              | -0.061               | 20.12                     | 31.91                 |
| 39035              | Cuyahoga, OH              | -0.148               | 3.66                      | 68.09                 |
| 39037              | Darke, OH                 | 0.016                | 65.68                     | 13.47                 |
| 39039              | Defiance, OH              | -0.029               | 35.47                     | 21.66                 |
| 39041              | Delaware, OH              | -0.005               | 51.54                     | 1.66                  |
| 39043              | Erie, OH                  | -0.089               | 11.56                     | 29.14                 |
| 39045              | Fairfield, OH             | -0.007               | 50.11                     | 23.54                 |
| 39047              | Fayette, OH               | -0.082               | 12.99                     | 50.16                 |
| 39049              | Franklin, OH              | -0.119               | 6.11                      | 51.24                 |
| 39051              | Fulton, OH                | -0.003               | 52.88                     | 17.77                 |
| 39053              | Gallia, OH                | 0.025                | 70.17                     | 66.4                  |
| 39055              | Geauga, OH                | 0.12                 | 93.86                     | 9.01                  |
| 39057              | Greene, OH                | -0.022               | 40.75                     | 20.76                 |
| 39059              | Guernsey, OH              | -0.033               | 33.08                     | 67.07                 |
| 39061              | Hamilton, OH              | -0.107               | 7.99                      | 53.69                 |
| 39063              | Hancock, OH               | -0.025               | 37.82                     | 21.11                 |
| 39065              | Hardin, OH                | 0.1                  | 91.82                     | 47.1                  |
| 39067              | Harrison, OH              | 0.031                | 72.84                     | 51.94                 |
| 39069              | Henry, OH                 | -0.064               | 19.45                     | 15.57                 |
| 39071              | Highland, OH              | -0.011               | 47.34                     | 68.98                 |
| 39073              | Hocking, OH               | 0.035                | 74.47                     | 46.85                 |
| 39075              | Holmes, OH                | 0.321                | 98.92                     | 43.6                  |

| <b>County FIPS</b> | <b>County Description</b> | <b>DOS-SVI Index</b> | <b>DOS-SVI Percentile</b> | <b>SVI Percentile</b> |
|--------------------|---------------------------|----------------------|---------------------------|-----------------------|
| 39077              | Huron, OH                 | -0.023               | 39.83                     | 43.25                 |
| 39079              | Jackson, OH               | 0.011                | 62.46                     | 77.26                 |
| 39081              | Jefferson, OH             | -0.02                | 41.45                     | 54.94                 |
| 39083              | Knox, OH                  | 0.075                | 87.36                     | 29.43                 |
| 39085              | Lake, OH                  | -0.092               | 10.89                     | 12.93                 |
| 39087              | Lawrence, OH              | -0.041               | 28.75                     | 55.83                 |
| 39089              | Licking, OH               | 0                    | 55.62                     | 22.9                  |
| 39091              | Logan, OH                 | 0.03                 | 72.3                      | 31.69                 |
| 39093              | Lorain, OH                | -0.087               | 11.88                     | 50.89                 |
| 39095              | Lucas, OH                 | -0.137               | 4.11                      | 68.76                 |
| 39097              | Madison, OH               | 0.078                | 88.32                     | 33.82                 |
| 39099              | Mahoning, OH              | -0.081               | 13.18                     | 58.89                 |
| 39101              | Marion, OH                | 0.068                | 85.83                     | 64.14                 |
| 39103              | Medina, OH                | 0.001                | 55.81                     | 1.02                  |
| 39105              | Meigs, OH                 | 0.013                | 63.61                     | 67.87                 |
| 39107              | Mercer, OH                | 0.023                | 69.05                     | 5.1                   |
| 39109              | Miami, OH                 | -0.028               | 35.98                     | 11.91                 |
| 39111              | Monroe, OH                | -0.018               | 43.08                     | 44.3                  |
| 39113              | Montgomery, OH            | -0.081               | 13.44                     | 67.26                 |
| 39115              | Morgan, OH                | -0.041               | 28.81                     | 56.59                 |
| 39117              | Morrow, OH                | 0.071                | 86.53                     | 19.2                  |
| 39119              | Muskingum, OH             | -0.021               | 41.16                     | 59.81                 |
| 39121              | Noble, OH                 | 0.176                | 96.97                     | 42.93                 |
| 39123              | Ottawa, OH                | -0.047               | 25.85                     | 15.41                 |
| 39125              | Paulding, OH              | 0.033                | 73.73                     | 28.85                 |
| 39127              | Perry, OH                 | -0.031               | 33.88                     | 55.45                 |
| 39129              | Pickaway, OH              | 0.063                | 84.59                     | 28.18                 |
| 39131              | Pike, OH                  | 0.011                | 62.59                     | 79.94                 |
| 39133              | Portage, OH               | -0.022               | 40.37                     | 24.55                 |
| 39135              | Preble, OH                | 0.013                | 63.55                     | 16.91                 |
| 39137              | Putnam, OH                | 0.022                | 68.89                     | 1.53                  |
| 39139              | Richland, OH              | 0.035                | 74.82                     | 61.69                 |
| 39141              | Ross, OH                  | 0.041                | 77.33                     | 72.55                 |
| 39143              | Sandusky, OH              | -0.073               | 15.89                     | 39.87                 |
| 39145              | Scioto, OH                | 0.008                | 60.49                     | 83.47                 |
| 39147              | Seneca, OH                | -0.027               | 36.61                     | 37.55                 |
| 39149              | Shelby, OH                | -0.004               | 51.86                     | 18.92                 |
| 39151              | Stark, OH                 | -0.047               | 25.69                     | 36.66                 |
| 39153              | Summit, OH                | -0.08                | 13.59                     | 33.34                 |
| 39155              | Trumbull, OH              | -0.066               | 17.86                     | 46.4                  |
| 39157              | Tuscarawas, OH            | 0.003                | 57.34                     | 34.43                 |
| 39159              | Union, OH                 | 0.064                | 85.07                     | 7.71                  |
| 39161              | Van Wert, OH              | -0.061               | 20.18                     | 16.97                 |
| 39163              | Vinton, OH                | 0.013                | 63.8                      | 72.29                 |
| 39165              | Warren, OH                | 0.003                | 57.59                     | 4.78                  |
| 39167              | Washington, OH            | -0.028               | 35.94                     | 34.97                 |
| 39169              | Wayne, OH                 | 0.087                | 89.81                     | 47.9                  |
| 39171              | Williams, OH              | 0.01                 | 62.11                     | 26.91                 |
| 39173              | Wood, OH                  | -0.019               | 42.69                     | 16.62                 |
| 39175              | Wyandot, OH               | -0.043               | 27.98                     | 22.74                 |
| 40001              | Adair, OK                 | 0                    | 55.33                     | 89.65                 |
| 40003              | Alfalfa, OK               | 0.151                | 95.83                     | 25.35                 |
| 40005              | Atoka, OK                 | 0.073                | 86.95                     | 80.76                 |
| 40007              | Beaver, OK                | -0.028               | 36.13                     | 45.54                 |
| 40009              | Beckham, OK               | 0.11                 | 92.81                     | 71.18                 |

| <b>County FIPS</b> | <b>County Description</b> | <b>DOS-SVI Index</b> | <b>DOS-SVI Percentile</b> | <b>SVI Percentile</b> |
|--------------------|---------------------------|----------------------|---------------------------|-----------------------|
| 40011              | Blaine, OK                | 0.054                | 81.79                     | 66.78                 |
| 40013              | Bryan, OK                 | 0.028                | 71.44                     | 81.27                 |
| 40015              | Caddo, OK                 | 0.019                | 67.11                     | 94.59                 |
| 40017              | Canadian, OK              | 0.009                | 61.25                     | 26.21                 |
| 40019              | Carter, OK                | -0.016               | 44.19                     | 79.14                 |
| 40021              | Cherokee, OK              | 0.02                 | 67.91                     | 92.71                 |
| 40023              | Choctaw, OK               | -0.062               | 19.87                     | 96.02                 |
| 40025              | Cimarron, OK              | -0.076               | 14.87                     | 44.75                 |
| 40027              | Cleveland, OK             | -0.031               | 34.1                      | 34.36                 |
| 40029              | Coal, OK                  | -0.036               | 31.39                     | 82.55                 |
| 40031              | Comanche, OK              | 0.004                | 58.42                     | 83.54                 |
| 40033              | Cotton, OK                | 0.047                | 79.5                      | 67.42                 |
| 40035              | Craig, OK                 | -0.024               | 39.1                      | 85.38                 |
| 40037              | Creek, OK                 | 0.011                | 62.85                     | 49.01                 |
| 40039              | Custer, OK                | 0.008                | 60.81                     | 75.03                 |
| 40041              | Delaware, OK              | -0.024               | 39.13                     | 76.97                 |
| 40043              | Dewey, OK                 | -0.012               | 46.67                     | 22.48                 |
| 40045              | Ellis, OK                 | -0.045               | 27.38                     | 30.19                 |
| 40047              | Garfield, OK              | -0.062               | 19.83                     | 59.08                 |
| 40049              | Garvin, OK                | -0.022               | 40.43                     | 51.15                 |
| 40051              | Grady, OK                 | 0.01                 | 62.3                      | 30.8                  |
| 40053              | Grant, OK                 | -0.061               | 20.28                     | 16.34                 |
| 40055              | Greer, OK                 | 0.047                | 79.53                     | 77.42                 |
| 40057              | Harmon, OK                | -0.066               | 18.11                     | 81.08                 |
| 40059              | Harper, OK                | -0.023               | 39.45                     | 31.85                 |
| 40061              | Haskell, OK               | 0.047                | 79.47                     | 87.36                 |
| 40063              | Hughes, OK                | 0.077                | 87.78                     | 81.15                 |
| 40065              | Jackson, OK               | -0.068               | 17.54                     | 82.26                 |
| 40067              | Jefferson, OK             | -0.05                | 24.58                     | 87.45                 |
| 40069              | Johnston, OK              | -0.002               | 53.58                     | 84.68                 |
| 40071              | Kay, OK                   | -0.014               | 45.18                     | 84.2                  |
| 40073              | Kingfisher, OK            | -0.038               | 30.79                     | 38.06                 |
| 40075              | Kiowa, OK                 | -0.078               | 14.42                     | 65.45                 |
| 40077              | Latimer, OK               | 0.036                | 75.29                     | 89.36                 |
| 40079              | Le Flore, OK              | -0.065               | 18.4                      | 90.32                 |
| 40081              | Lincoln, OK               | 0.041                | 77.43                     | 47.87                 |
| 40083              | Logan, OK                 | 0.046                | 79.05                     | 29.84                 |
| 40085              | Love, OK                  | -0.027               | 37.09                     | 62.93                 |
| 40087              | McClain, OK               | -0.018               | 43.14                     | 16.24                 |
| 40089              | McCurtain, OK             | 0.039                | 76.44                     | 91.37                 |
| 40091              | McIntosh, OK              | 0.077                | 87.97                     | 78.28                 |
| 40093              | Major, OK                 | 0.017                | 66.16                     | 32.04                 |
| 40095              | Marshall, OK              | -0.099               | 9.46                      | 85.45                 |
| 40097              | Mayes, OK                 | 0.009                | 61.57                     | 75.19                 |
| 40099              | Murray, OK                | -0.016               | 43.97                     | 70.92                 |
| 40101              | Muskogee, OK              | -0.057               | 22.16                     | 93.38                 |
| 40103              | Noble, OK                 | 0.046                | 78.99                     | 33.85                 |
| 40105              | Nowata, OK                | -0.025               | 37.73                     | 58.95                 |
| 40107              | Okfuskee, OK              | 0.169                | 96.62                     | 92.87                 |
| 40109              | Oklahoma, OK              | -0.13                | 4.62                      | 68.18                 |
| 40111              | Okmulgee, OK              | -0.01                | 47.53                     | 86.59                 |
| 40113              | Osage, OK                 | 0.035                | 74.85                     | 62.39                 |
| 40115              | Ottawa, OK                | -0.029               | 35.82                     | 95.76                 |
| 40117              | Pawnee, OK                | 0.042                | 77.52                     | 54.24                 |
| 40119              | Payne, OK                 | 0.077                | 87.74                     | 51.31                 |

| <b>County FIPS</b> | <b>County Description</b> | <b>DOS-SVI Index</b> | <b>DOS-SVI Percentile</b> | <b>SVI Percentile</b> |
|--------------------|---------------------------|----------------------|---------------------------|-----------------------|
| 40121              | Pittsburg, OK             | 0.008                | 60.46                     | 82.64                 |
| 40123              | Pontotoc, OK              | -0.022               | 40.62                     | 65                    |
| 40125              | Pottawatomie, OK          | 0.02                 | 68                        | 78.15                 |
| 40127              | Pushmataha, OK            | 0.051                | 80.8                      | 78.63                 |
| 40129              | Roger Mills, OK           | -0.024               | 38.68                     | 40.03                 |
| 40131              | Rogers, OK                | 0.004                | 58.48                     | 28.34                 |
| 40133              | Seminole, OK              | 0.005                | 58.99                     | 92.9                  |
| 40135              | Sequoyah, OK              | 0.009                | 61.73                     | 91.59                 |
| 40137              | Stephens, OK              | -0.058               | 21.68                     | 60.51                 |
| 40139              | Texas, OK                 | -0.101               | 8.91                      | 82.1                  |
| 40141              | Tillman, OK               | -0.044               | 27.54                     | 87.1                  |
| 40143              | Tulsa, OK                 | -0.131               | 4.46                      | 61.59                 |
| 40145              | Wagoner, OK               | 0                    | 55.75                     | 42.45                 |
| 40147              | Washington, OK            | -0.058               | 21.52                     | 43.82                 |
| 40149              | Washita, OK               | 0.024                | 69.82                     | 40.45                 |
| 40151              | Woods, OK                 | -0.035               | 31.49                     | 31.4                  |
| 40153              | Woodward, OK              | -0.013               | 45.59                     | 57.45                 |
| 41001              | Baker, OR                 | 0.089                | 90.1                      | 68.54                 |
| 41003              | Benton, OR                | 0.033                | 73.83                     | 34.9                  |
| 41005              | Clackamas, OR             | -0.023               | 39.38                     | 18.95                 |
| 41007              | Clatsop, OR               | 0.007                | 60.14                     | 51.85                 |
| 41009              | Columbia, OR              | 0.002                | 57.12                     | 40.25                 |
| 41011              | Coos, OR                  | 0.022                | 68.74                     | 74.3                  |
| 41013              | Crook, OR                 | 0.052                | 81.15                     | 57.29                 |
| 41015              | Curry, OR                 | -0.045               | 27.06                     | 48.79                 |
| 41017              | Deschutes, OR             | 0.001                | 56.06                     | 16.37                 |
| 41019              | Douglas, OR               | 0.029                | 72.14                     | 72.77                 |
| 41021              | Gilliam, OR               | 0.01                 | 61.8                      | 50.92                 |
| 41023              | Grant, OR                 | 0.05                 | 80.42                     | 54.65                 |
| 41025              | Harney, OR                | 0.082                | 88.83                     | 71.08                 |
| 41027              | Hood River, OR            | 0.016                | 65.39                     | 54.55                 |
| 41029              | Jackson, OR               | -0.012               | 46.2                      | 73.54                 |
| 41031              | Jefferson, OR             | 0.065                | 85.2                      | 91.18                 |
| 41033              | Josephine, OR             | 0.097                | 91.34                     | 65.57                 |
| 41035              | Klamath, OR               | 0.017                | 66                        | 86.88                 |
| 41037              | Lake, OR                  | 0.097                | 91.44                     | 76.08                 |
| 41039              | Lane, OR                  | -0.029               | 35.85                     | 64.9                  |
| 41041              | Lincoln, OR               | -0.017               | 43.65                     | 55.22                 |
| 41043              | Linn, OR                  | 0.002                | 57.05                     | 67.9                  |
| 41045              | Malheur, OR               | 0.105                | 92.33                     | 99.65                 |
| 41047              | Marion, OR                | -0.031               | 34.42                     | 85.35                 |
| 41049              | Morrow, OR                | 0.086                | 89.53                     | 76.43                 |
| 41051              | Multnomah, OR             | -0.07                | 16.84                     | 46.75                 |
| 41053              | Polk, OR                  | -0.04                | 29.23                     | 57.77                 |
| 41055              | Sherman, OR               | -0.081               | 13.15                     | 13.5                  |
| 41057              | Tillamook, OR             | 0.034                | 74.24                     | 65.86                 |
| 41059              | Umatilla, OR              | 0.065                | 85.13                     | 96.88                 |
| 41061              | Union, OR                 | 0.044                | 78.29                     | 67.29                 |
| 41063              | Wallowa, OR               | 0.025                | 70.23                     | 50.32                 |
| 41065              | Wasco, OR                 | -0.018               | 43.3                      | 83.89                 |
| 41067              | Washington, OR            | -0.064               | 19.29                     | 31.94                 |
| 41069              | Wheeler, OR               | -0.03                | 35.18                     | 39.01                 |
| 41071              | Yamhill, OR               | 0.036                | 75.36                     | 66.08                 |
| 42001              | Adams, PA                 | 0.025                | 70.14                     | 21.18                 |
| 42003              | Allegheny, PA             | -0.017               | 43.94                     | 25.06                 |

| <b>County FIPS</b> | <b>County Description</b> | <b>DOS-SVI Index</b> | <b>DOS-SVI Percentile</b> | <b>SVI Percentile</b> |
|--------------------|---------------------------|----------------------|---------------------------|-----------------------|
| 42005              | Armstrong, PA             | 0.008                | 60.74                     | 24.75                 |
| 42007              | Beaver, PA                | -0.006               | 50.91                     | 24.81                 |
| 42009              | Bedford, PA               | 0.025                | 70.04                     | 27.29                 |
| 42011              | Berks, PA                 | -0.08                | 13.63                     | 61.62                 |
| 42013              | Blair, PA                 | -0.018               | 43.39                     | 39.81                 |
| 42015              | Bradford, PA              | 0.019                | 67.37                     | 34.71                 |
| 42017              | Bucks, PA                 | -0.048               | 25.5                      | 8.31                  |
| 42019              | Butler, PA                | 0.027                | 70.93                     | 7.9                   |
| 42021              | Cambria, PA               | 0.042                | 77.81                     | 48.92                 |
| 42023              | Cameron, PA               | -0.03                | 35.27                     | 30.06                 |
| 42025              | Carbon, PA                | 0.011                | 62.81                     | 30.48                 |
| 42027              | Centre, PA                | 0.119                | 93.76                     | 28.92                 |
| 42029              | Chester, PA               | -0.025               | 38.2                      | 14.36                 |
| 42031              | Clarion, PA               | 0.024                | 69.53                     | 47.71                 |
| 42033              | Clearfield, PA            | 0.053                | 81.6                      | 60.54                 |
| 42035              | Clinton, PA               | 0.049                | 80.01                     | 48.6                  |
| 42037              | Columbia, PA              | 0.015                | 65.23                     | 27.68                 |
| 42039              | Crawford, PA              | 0.049                | 80.23                     | 50.64                 |
| 42041              | Cumberland, PA            | 0.009                | 61.32                     | 16.15                 |
| 42043              | Dauphin, PA               | -0.079               | 13.98                     | 49.75                 |
| 42045              | Delaware, PA              | -0.032               | 33.52                     | 41.31                 |
| 42047              | Elk, PA                   | -0.006               | 50.62                     | 11.66                 |
| 42049              | Erie, PA                  | -0.014               | 45.11                     | 61.94                 |
| 42051              | Fayette, PA               | 0.023                | 69.12                     | 62.48                 |
| 42053              | Forest, PA                | 0.587                | 99.71                     | 71.15                 |
| 42055              | Franklin, PA              | -0.026               | 37.31                     | 33.73                 |
| 42057              | Fulton, PA                | -0.014               | 45.21                     | 22.01                 |
| 42059              | Greene, PA                | 0.078                | 88.22                     | 43.5                  |
| 42061              | Huntingdon, PA            | 0.119                | 93.79                     | 49.08                 |
| 42063              | Indiana, PA               | 0.09                 | 90.35                     | 54.84                 |
| 42065              | Jefferson, PA             | -0.007               | 50.4                      | 33.12                 |
| 42067              | Juniata, PA               | 0.022                | 68.83                     | 44.84                 |
| 42069              | Lackawanna, PA            | -0.011               | 47.02                     | 52.52                 |
| 42071              | Lancaster, PA             | 0.004                | 58.26                     | 45.73                 |
| 42073              | Lawrence, PA              | -0.02                | 42.02                     | 46.94                 |
| 42075              | Lebanon, PA               | -0.009               | 48.62                     | 53.28                 |
| 42077              | Lehigh, PA                | -0.099               | 9.36                      | 63.5                  |
| 42079              | Luzerne, PA               | -0.037               | 30.82                     | 60.89                 |
| 42081              | Lycoming, PA              | 0.007                | 59.82                     | 42.1                  |
| 42083              | McKean, PA                | 0.04                 | 77.01                     | 54.62                 |
| 42085              | Mercer, PA                | 0.058                | 82.87                     | 54.2                  |
| 42087              | Mifflin, PA               | 0.017                | 65.97                     | 47.23                 |
| 42089              | Monroe, PA                | -0.025               | 37.85                     | 30.64                 |
| 42091              | Montgomery, PA            | -0.064               | 18.91                     | 16.53                 |
| 42093              | Montour, PA               | 0.056                | 82.46                     | 31.11                 |
| 42095              | Northampton, PA           | -0.038               | 30.25                     | 28.76                 |
| 42097              | Northumberland, PA        | 0.031                | 72.68                     | 50.06                 |
| 42099              | Perry, PA                 | 0.005                | 58.84                     | 10.89                 |
| 42101              | Philadelphia, PA          | -0.038               | 30.28                     | 92.04                 |
| 42103              | Pike, PA                  | -0.035               | 31.84                     | 12.87                 |
| 42105              | Potter, PA                | 0.002                | 57.18                     | 44.17                 |
| 42107              | Schuylkill, PA            | 0.015                | 64.88                     | 45.06                 |
| 42109              | Snyder, PA                | 0.064                | 84.81                     | 22.99                 |
| 42111              | Somerset, PA              | 0.068                | 85.99                     | 42.26                 |
| 42113              | Sullivan, PA              | 0.029                | 71.95                     | 35.76                 |

| <b>County FIPS</b> | <b>County Description</b> | <b>DOS-SVI Index</b> | <b>DOS-SVI Percentile</b> | <b>SVI Percentile</b> |
|--------------------|---------------------------|----------------------|---------------------------|-----------------------|
| 42115              | Susquehanna, PA           | -0.006               | 50.78                     | 20.64                 |
| 42117              | Tioga, PA                 | -0.001               | 54.73                     | 31.53                 |
| 42119              | Union, PA                 | 0.246                | 98.31                     | 36.05                 |
| 42121              | Venango, PA               | 0.004                | 57.88                     | 42.29                 |
| 42123              | Warren, PA                | -0.003               | 52.91                     | 21.34                 |
| 42125              | Washington, PA            | 0.026                | 70.39                     | 16.94                 |
| 42127              | Wayne, PA                 | 0.071                | 86.44                     | 26.31                 |
| 42129              | Westmoreland, PA          | 0.002                | 57.24                     | 13.79                 |
| 42131              | Wyoming, PA               | 0.021                | 68.13                     | 11.21                 |
| 42133              | York, PA                  | -0.035               | 31.8                      | 32.9                  |
| 44001              | Bristol, RI               | 0.019                | 67.27                     | 12.36                 |
| 44003              | Kent, RI                  | -0.076               | 14.93                     | 15.19                 |
| 44005              | Newport, RI               | -0.013               | 45.84                     | 17.9                  |
| 44007              | Providence, RI            | -0.144               | 3.88                      | 75.92                 |
| 44009              | Washington, RI            | 0.035                | 74.78                     | 8.89                  |
| 45001              | Abbeville, SC             | -0.031               | 34.26                     | 85.64                 |
| 45003              | Aiken, SC                 | -0.058               | 21.81                     | 66.66                 |
| 45005              | Allendale, SC             | 0.109                | 92.61                     | 99.3                  |
| 45007              | Anderson, SC              | -0.026               | 37.19                     | 70.1                  |
| 45009              | Bamberg, SC               | -0.086               | 12.13                     | 95.16                 |
| 45011              | Barnwell, SC              | -0.07                | 16.87                     | 99.04                 |
| 45013              | Beaufort, SC              | -0.108               | 7.7                       | 40.06                 |
| 45015              | Berkeley, SC              | -0.083               | 12.7                      | 51.46                 |
| 45017              | Calhoun, SC               | -0.002               | 53.77                     | 56.27                 |
| 45019              | Charleston, SC            | -0.088               | 11.81                     | 31.56                 |
| 45021              | Cherokee, SC              | -0.034               | 32.22                     | 69.78                 |
| 45023              | Chester, SC               | -0.026               | 37.57                     | 73.63                 |
| 45025              | Chesterfield, SC          | 0.051                | 80.87                     | 94.87                 |
| 45027              | Clarendon, SC             | 0.023                | 69.31                     | 97.93                 |
| 45029              | Colleton, SC              | -0.067               | 17.83                     | 80                    |
| 45031              | Darlington, SC            | -0.011               | 47.09                     | 92.68                 |
| 45033              | Dillon, SC                | -0.05                | 24.42                     | 96.82                 |
| 45035              | Dorchester, SC            | -0.081               | 13.24                     | 41.88                 |
| 45037              | Edgefield, SC             | 0.005                | 59.12                     | 84.84                 |
| 45039              | Fairfield, SC             | -0.063               | 19.77                     | 74.84                 |
| 45041              | Florence, SC              | -0.059               | 21.33                     | 89.87                 |
| 45043              | Georgetown, SC            | -0.092               | 10.79                     | 67.71                 |
| 45045              | Greenville, SC            | -0.075               | 15.31                     | 50.38                 |
| 45047              | Greenwood, SC             | -0.092               | 10.82                     | 93.44                 |
| 45049              | Hampton, SC               | -0.006               | 50.59                     | 80.32                 |
| 45051              | Horry, SC                 | -0.199               | 1.3                       | 61.02                 |
| 45053              | Jasper, SC                | -0.114               | 6.72                      | 94.49                 |
| 45055              | Kershaw, SC               | -0.091               | 11.05                     | 49.59                 |
| 45057              | Lancaster, SC             | -0.024               | 38.49                     | 51.21                 |
| 45059              | Laurens, SC               | -0.011               | 46.9                      | 91.72                 |
| 45061              | Lee, SC                   | 0.051                | 80.77                     | 92.1                  |
| 45063              | Lexington, SC             | -0.039               | 29.8                      | 44.2                  |
| 45065              | McCormick, SC             | 0.034                | 74.34                     | 73.73                 |
| 45067              | Marion, SC                | -0.072               | 16.05                     | 92.93                 |
| 45069              | Marlboro, SC              | 0.068                | 86.06                     | 98.69                 |
| 45071              | Newberry, SC              | -0.06                | 20.63                     | 92.32                 |
| 45073              | Oconee, SC                | -0.057               | 21.94                     | 72.93                 |
| 45075              | Orangeburg, SC            | -0.041               | 29.04                     | 92.29                 |
| 45077              | Pickens, SC               | -0.002               | 54.12                     | 59.9                  |
| 45079              | Richland, SC              | -0.104               | 8.44                      | 63.09                 |

| <b>County FIPS</b> | <b>County Description</b> | <b>DOS-SVI Index</b> | <b>DOS-SVI Percentile</b> | <b>SVI Percentile</b> |
|--------------------|---------------------------|----------------------|---------------------------|-----------------------|
| 45081              | Saluda, SC                | -0.119               | 6.08                      | 79.49                 |
| 45083              | Spartanburg, SC           | -0.04                | 29.51                     | 76.18                 |
| 45085              | Sumter, SC                | -0.047               | 26.07                     | 97.32                 |
| 45087              | Union, SC                 | -0.07                | 16.71                     | 86.78                 |
| 45089              | Williamsburg, SC          | -0.004               | 52.21                     | 97.04                 |
| 45091              | York, SC                  | -0.084               | 12.54                     | 36.62                 |
| 46003              | Aurora, SD                | -0.013               | 45.4                      | 27.26                 |
| 46005              | Beadle, SD                | -0.059               | 21.3                      | 65.06                 |
| 46007              | Bennett, SD               | 0.177                | 97.04                     | 79.27                 |
| 46009              | Bon Homme, SD             | 0.187                | 97.36                     | 23.82                 |
| 46011              | Brookings, SD             | 0.041                | 77.24                     | 15.61                 |
| 46013              | Brown, SD                 | -0.051               | 24.16                     | 32.87                 |
| 46015              | Brule, SD                 | -0.055               | 22.54                     | 57.13                 |
| 46017              | Buffalo, SD               | 0.149                | 95.7                      | 97.1                  |
| 46019              | Butte, SD                 | -0.029               | 35.75                     | 36.27                 |
| 46021              | Campbell, SD              | 0.064                | 85.1                      | 0.64                  |
| 46023              | Charles Mix, SD           | 0.059                | 83.16                     | 73.89                 |
| 46025              | Clark, SD                 | 0.06                 | 83.8                      | 17.1                  |
| 46027              | Clay, SD                  | 0.052                | 81.22                     | 24.68                 |
| 46029              | Codington, SD             | -0.013               | 45.81                     | 24.49                 |
| 46031              | Corson, SD                | 0.208                | 97.77                     | 83.95                 |
| 46033              | Custer, SD                | 0.023                | 69.09                     | 22.8                  |
| 46035              | Davison, SD               | -0.043               | 28.14                     | 23.38                 |
| 46037              | Day, SD                   | -0.107               | 8.09                      | 18.5                  |
| 46039              | Deuel, SD                 | 0.006                | 59.22                     | 8.22                  |
| 46041              | Dewey, SD                 | 0.276                | 98.47                     | 88.31                 |
| 46043              | Douglas, SD               | 0.1                  | 91.66                     | 15.03                 |
| 46045              | Edmunds, SD               | 0.066                | 85.42                     | 3.41                  |
| 46047              | Fall River, SD            | -0.02                | 42.25                     | 41.72                 |
| 46049              | Faulk, SD                 | 0.121                | 93.89                     | 7.77                  |
| 46051              | Grant, SD                 | -0.054               | 22.92                     | 5.51                  |
| 46053              | Gregory, SD               | -0.052               | 23.81                     | 28.47                 |
| 46055              | Haakon, SD                | -0.039               | 29.64                     | 36.24                 |
| 46057              | Hamlin, SD                | 0.096                | 91.09                     | 15.86                 |
| 46059              | Hand, SD                  | -0.064               | 18.88                     | 3.09                  |
| 46061              | Hanson, SD                | 0.028                | 71.35                     | 0.13                  |
| 46063              | Harding, SD               | 0.111                | 92.84                     | 8.28                  |
| 46065              | Hughes, SD                | 0.065                | 85.26                     | 40.61                 |
| 46067              | Hutchinson, SD            | 0.063                | 84.46                     | 24.87                 |
| 46069              | Hyde, SD                  | 0.06                 | 83.6                      | 9.43                  |
| 46071              | Jackson, SD               | 0.243                | 98.25                     | 96.66                 |
| 46073              | Jerauld, SD               | -0.003               | 53.1                      | 5.06                  |
| 46075              | Jones, SD                 | -0.003               | 53.01                     | 0.51                  |
| 46077              | Kingsbury, SD             | -0.031               | 34                        | 2.23                  |
| 46079              | Lake, SD                  | 0.09                 | 90.23                     | 19.65                 |
| 46081              | Lawrence, SD              | 0.009                | 61.48                     | 26.18                 |
| 46083              | Lincoln, SD               | -0.044               | 27.73                     | 2.01                  |
| 46085              | Lyman, SD                 | 0.087                | 89.84                     | 71.37                 |
| 46087              | McCook, SD                | 0.046                | 79.08                     | 22.29                 |
| 46089              | McPherson, SD             | 0.054                | 81.92                     | 28.89                 |
| 46091              | Marshall, SD              | 0.001                | 55.91                     | 21.31                 |
| 46093              | Meade, SD                 | 0.025                | 70.26                     | 8.92                  |
| 46095              | Mellette, SD              | 0.173                | 96.78                     | 91.56                 |
| 46097              | Miner, SD                 | 0.079                | 88.57                     | 10.57                 |
| 46099              | Minnehaha, SD             | -0.106               | 8.18                      | 35.89                 |



| <b>County FIPS</b> | <b>County Description</b> | <b>DOS-SVI Index</b> | <b>DOS-SVI Percentile</b> | <b>SVI Percentile</b> |
|--------------------|---------------------------|----------------------|---------------------------|-----------------------|
| 46101              | Moody, SD                 | 0                    | 55.3                      | 39.08                 |
| 46102              | Oglala Lakota, SD         | 1.03                 | 99.84                     | 99.43                 |
| 46103              | Pennington, SD            | -0.044               | 27.67                     | 41.62                 |
| 46105              | Perkins, SD               | 0.053                | 81.44                     | 10.96                 |
| 46107              | Potter, SD                | 0.001                | 56.32                     | 5.16                  |
| 46109              | Roberts, SD               | -0.095               | 10.25                     | 71.78                 |
| 46111              | Sanborn, SD               | -0.028               | 36.29                     | 3.85                  |
| 46115              | Spink, SD                 | -0.024               | 39.29                     | 17.68                 |
| 46117              | Stanley, SD               | -0.06                | 20.79                     | 10.99                 |
| 46119              | Sully, SD                 | -0.02                | 42.28                     | 0.73                  |
| 46121              | Todd, SD                  | 0.176                | 97.01                     | 95.64                 |
| 46123              | Tripp, SD                 | -0.101               | 8.95                      | 34.11                 |
| 46125              | Turner, SD                | -0.033               | 33.11                     | 10.8                  |
| 46127              | Union, SD                 | -0.097               | 9.9                       | 2.74                  |
| 46129              | Walworth, SD              | 0.109                | 92.65                     | 39.39                 |
| 46135              | Yankton, SD               | -0.049               | 25.21                     | 31.59                 |
| 46137              | Ziebach, SD               | 0.352                | 99.3                      | 95.38                 |
| 47001              | Anderson, TN              | -0.065               | 18.37                     | 60.64                 |
| 47003              | Bedford, TN               | -0.03                | 35.12                     | 77.58                 |
| 47005              | Benton, TN                | -0.018               | 42.85                     | 70.29                 |
| 47007              | Bledsoe, TN               | 0.05                 | 80.52                     | 81.59                 |
| 47009              | Blount, TN                | -0.014               | 44.95                     | 24.52                 |
| 47011              | Bradley, TN               | -0.014               | 45.02                     | 69.14                 |
| 47013              | Campbell, TN              | -0.08                | 13.72                     | 73.38                 |
| 47015              | Cannon, TN                | 0.014                | 64.28                     | 37.04                 |
| 47017              | Carroll, TN               | -0.007               | 49.98                     | 74.43                 |
| 47019              | Carter, TN                | -0.045               | 26.77                     | 61.53                 |
| 47021              | Cheatham, TN              | -0.025               | 38.17                     | 23.69                 |
| 47023              | Chester, TN               | 0.041                | 77.2                      | 64.36                 |
| 47025              | Claiborne, TN             | 0                    | 55.11                     | 71.02                 |
| 47027              | Clay, TN                  | -0.055               | 22.83                     | 59.39                 |
| 47029              | Cocke, TN                 | -0.085               | 12.26                     | 68.57                 |
| 47031              | Coffee, TN                | 0.006                | 59.25                     | 49.14                 |
| 47033              | Crockett, TN              | -0.01                | 47.85                     | 78.12                 |
| 47035              | Cumberland, TN            | -0.043               | 28.37                     | 53.73                 |
| 47037              | Davidson, TN              | -0.197               | 1.4                       | 53.63                 |
| 47039              | Decatur, TN               | -0.024               | 39                        | 50.86                 |
| 47041              | DeKalb, TN                | 0.008                | 60.9                      | 43.06                 |
| 47043              | Dickson, TN               | 0.012                | 63.45                     | 42.9                  |
| 47045              | Dyer, TN                  | -0.078               | 14.2                      | 75.96                 |
| 47047              | Fayette, TN               | -0.044               | 27.6                      | 25.54                 |
| 47049              | Fentress, TN              | 0.052                | 81.12                     | 63.73                 |
| 47051              | Franklin, TN              | 0.006                | 59.63                     | 37.64                 |
| 47053              | Gibson, TN                | -0.052               | 23.69                     | 73.5                  |
| 47055              | Giles, TN                 | 0                    | 55.2                      | 60.32                 |
| 47057              | Grainger, TN              | 0.008                | 60.52                     | 59.3                  |
| 47059              | Greene, TN                | -0.013               | 45.72                     | 54.46                 |
| 47061              | Grundy, TN                | -0.034               | 32.28                     | 86.85                 |
| 47063              | Hamblen, TN               | -0.04                | 29.29                     | 81.46                 |
| 47065              | Hamilton, TN              | -0.066               | 18.08                     | 41.37                 |
| 47067              | Hancock, TN               | -0.023               | 39.76                     | 76.66                 |
| 47069              | Hardeman, TN              | 0.076                | 87.55                     | 86.72                 |
| 47071              | Hardin, TN                | -0.019               | 42.6                      | 70.64                 |
| 47073              | Hawkins, TN               | -0.04                | 29.39                     | 70.8                  |
| 47075              | Haywood, TN               | -0.08                | 13.82                     | 87.17                 |

| <b>County FIPS</b> | <b>County Description</b> | <b>DOS-SVI Index</b> | <b>DOS-SVI Percentile</b> | <b>SVI Percentile</b> |
|--------------------|---------------------------|----------------------|---------------------------|-----------------------|
| 47077              | Henderson, TN             | 0.028                | 71.41                     | 69.81                 |
| 47079              | Henry, TN                 | -0.06                | 20.92                     | 63.47                 |
| 47081              | Hickman, TN               | 0.032                | 73.35                     | 56.62                 |
| 47083              | Houston, TN               | -0.011               | 46.74                     | 55.51                 |
| 47085              | Humphreys, TN             | 0.014                | 64.47                     | 36.88                 |
| 47087              | Jackson, TN               | -0.009               | 48.68                     | 60                    |
| 47089              | Jefferson, TN             | 0.029                | 72.02                     | 56.08                 |
| 47091              | Johnson, TN               | 0.073                | 86.98                     | 56.53                 |
| 47093              | Knox, TN                  | -0.084               | 12.64                     | 30.35                 |
| 47095              | Lake, TN                  | 0.258                | 98.38                     | 91.85                 |
| 47097              | Lauderdale, TN            | 0.048                | 79.88                     | 96.72                 |
| 47099              | Lawrence, TN              | 0.027                | 70.74                     | 83.18                 |
| 47101              | Lewis, TN                 | 0.012                | 63.13                     | 63.63                 |
| 47103              | Lincoln, TN               | -0.008               | 49.48                     | 67.77                 |
| 47105              | Loudon, TN                | -0.004               | 52.63                     | 38.63                 |
| 47107              | McMinn, TN                | -0.008               | 48.97                     | 65.51                 |
| 47109              | McNairy, TN               | 0.031                | 73.07                     | 71.72                 |
| 47111              | Macon, TN                 | -0.089               | 11.53                     | 69.27                 |
| 47113              | Madison, TN               | -0.061               | 20.41                     | 71.24                 |
| 47115              | Marion, TN                | -0.034               | 32.54                     | 50.61                 |
| 47117              | Marshall, TN              | -0.058               | 21.84                     | 60.99                 |
| 47119              | Maury, TN                 | -0.024               | 38.94                     | 39.49                 |
| 47121              | Meigs, TN                 | 0.057                | 82.68                     | 49.33                 |
| 47123              | Monroe, TN                | 0.042                | 77.84                     | 64.78                 |
| 47125              | Montgomery, TN            | -0.059               | 21.04                     | 51.72                 |
| 47127              | Moore, TN                 | 0.035                | 74.72                     | 9.14                  |
| 47129              | Morgan, TN                | 0.135                | 95                        | 74.94                 |
| 47131              | Obion, TN                 | -0.051               | 24.1                      | 76.94                 |
| 47133              | Overton, TN               | 0.024                | 69.69                     | 45.76                 |
| 47135              | Perry, TN                 | 0.015                | 64.92                     | 67.99                 |
| 47137              | Pickett, TN               | 0.003                | 57.5                      | 41.53                 |
| 47139              | Polk, TN                  | 0.032                | 73.45                     | 49.04                 |
| 47141              | Putnam, TN                | -0.061               | 20.34                     | 61.82                 |
| 47143              | Rhea, TN                  | -0.03                | 34.54                     | 82.07                 |
| 47145              | Roane, TN                 | 0.033                | 73.89                     | 38.44                 |
| 47147              | Robertson, TN             | -0.004               | 52.4                      | 42.87                 |
| 47149              | Rutherford, TN            | -0.08                | 13.75                     | 32.68                 |
| 47151              | Scott, TN                 | -0.112               | 7.1                       | 76.37                 |
| 47153              | Sequatchie, TN            | 0.021                | 68.48                     | 57.2                  |
| 47155              | Sevier, TN                | -0.061               | 20.02                     | 61.11                 |
| 47157              | Shelby, TN                | -0.153               | 3.22                      | 78.47                 |
| 47159              | Smith, TN                 | -0.021               | 41.29                     | 26.08                 |
| 47161              | Stewart, TN               | -0.001               | 54.57                     | 40.86                 |
| 47163              | Sullivan, TN              | -0.04                | 29.26                     | 54.11                 |
| 47165              | Sumner, TN                | -0.075               | 15.25                     | 20.57                 |
| 47167              | Tipton, TN                | -0.037               | 30.95                     | 45                    |
| 47169              | Trousdale, TN             | -0.053               | 23.43                     | 52.2                  |
| 47171              | Unicoi, TN                | -0.065               | 18.62                     | 79.81                 |
| 47173              | Union, TN                 | 0.033                | 73.77                     | 66.72                 |
| 47175              | Van Buren, TN             | 0.111                | 92.9                      | 60.25                 |
| 47177              | Warren, TN                | -0.079               | 13.95                     | 83.22                 |
| 47179              | Washington, TN            | -0.052               | 23.97                     | 45.89                 |
| 47181              | Wayne, TN                 | 0.15                 | 95.73                     | 76.24                 |
| 47183              | Weakley, TN               | 0.028                | 71.63                     | 65.83                 |
| 47185              | White, TN                 | 0.021                | 68.45                     | 59.84                 |

| <b>County FIPS</b> | <b>County Description</b> | <b>DOS-SVI Index</b> | <b>DOS-SVI Percentile</b> | <b>SVI Percentile</b> |
|--------------------|---------------------------|----------------------|---------------------------|-----------------------|
| 47187              | Williamson, TN            | -0.007               | 49.67                     | 2.1                   |
| 47189              | Wilson, TN                | -0.038               | 30.56                     | 14.65                 |
| 48001              | Anderson, TX              | 0.225                | 98.15                     | 79.46                 |
| 48003              | Andrews, TX               | 0.07                 | 86.41                     | 47.36                 |
| 48005              | Angelina, TX              | -0.018               | 42.95                     | 97.71                 |
| 48007              | Aransas, TX               | -0.036               | 31.17                     | 80.19                 |
| 48009              | Archer, TX                | 0.007                | 59.98                     | 8.98                  |
| 48011              | Armstrong, TX             | 0.032                | 73.19                     | 15.99                 |
| 48013              | Atascosa, TX              | 0.091                | 90.42                     | 84.97                 |
| 48015              | Austin, TX                | 0.038                | 76.22                     | 49.36                 |
| 48017              | Bailey, TX                | -0.081               | 13.37                     | 80.03                 |
| 48019              | Bandera, TX               | -0.012               | 46.42                     | 50.76                 |
| 48021              | Bastrop, TX               | 0.069                | 86.12                     | 74.59                 |
| 48023              | Baylor, TX                | -0.045               | 26.9                      | 15.54                 |
| 48025              | Bee, TX                   | 0.282                | 98.6                      | 96.94                 |
| 48027              | Bell, TX                  | -0.034               | 32.35                     | 80.51                 |
| 48029              | Bexar, TX                 | -0.178               | 1.91                      | 82.58                 |
| 48031              | Blanco, TX                | 0.055                | 82.17                     | 27.83                 |
| 48033              | Borden, TX                | -0.009               | 48.36                     | 6.21                  |
| 48035              | Bosque, TX                | 0.005                | 58.58                     | 61.75                 |
| 48037              | Bowie, TX                 | 0.019                | 67.05                     | 85.29                 |
| 48039              | Brazoria, TX              | -0.045               | 27                        | 51.34                 |
| 48041              | Brazos, TX                | -0.097               | 9.87                      | 65.32                 |
| 48043              | Brewster, TX              | -0.045               | 27.03                     | 65.73                 |
| 48045              | Briscoe, TX               | -0.13                | 4.58                      | 45.64                 |
| 48047              | Brooks, TX                | -0.177               | 1.97                      | 100                   |
| 48049              | Brown, TX                 | -0.013               | 45.75                     | 62.77                 |
| 48051              | Burleson, TX              | 0.097                | 91.21                     | 60.8                  |
| 48053              | Burnet, TX                | -0.025               | 37.66                     | 52.99                 |
| 48055              | Caldwell, TX              | 0.082                | 88.89                     | 87.32                 |
| 48057              | Calhoun, TX               | 0.056                | 82.55                     | 86.18                 |
| 48059              | Callahan, TX              | 0.025                | 70.2                      | 29.68                 |
| 48061              | Cameron, TX               | -0.161               | 2.74                      | 97.58                 |
| 48063              | Camp, TX                  | 0.005                | 59.06                     | 90.19                 |
| 48065              | Carson, TX                | -0.045               | 27.19                     | 3.38                  |
| 48067              | Cass, TX                  | 0.09                 | 90.26                     | 78.41                 |
| 48069              | Castro, TX                | -0.122               | 5.76                      | 77.74                 |
| 48071              | Chambers, TX              | -0.025               | 38.11                     | 41.08                 |
| 48073              | Cherokee, TX              | 0.088                | 89.97                     | 91.91                 |
| 48075              | Childress, TX             | 0.118                | 93.73                     | 75                    |
| 48077              | Clay, TX                  | 0.045                | 78.77                     | 31.82                 |
| 48079              | Cochran, TX               | -0.07                | 16.75                     | 86.08                 |
| 48081              | Coke, TX                  | -0.068               | 17.48                     | 62.04                 |
| 48083              | Coleman, TX               | -0.114               | 6.81                      | 41.85                 |
| 48085              | Collin, TX                | -0.138               | 4.08                      | 15.06                 |
| 48087              | Collingsworth, TX         | -0.024               | 38.97                     | 88.76                 |
| 48089              | Colorado, TX              | 0.078                | 88.38                     | 68.47                 |
| 48091              | Comal, TX                 | -0.052               | 23.78                     | 23.79                 |
| 48093              | Comanche, TX              | -0.052               | 24.04                     | 72.64                 |
| 48095              | Concho, TX                | -0.001               | 54.63                     | 42.83                 |
| 48097              | Cooke, TX                 | 0.006                | 59.47                     | 62.26                 |
| 48099              | Coryell, TX               | 0.175                | 96.91                     | 78.09                 |
| 48101              | Cottle, TX                | -0.064               | 19.42                     | 93.63                 |
| 48103              | Crane, TX                 | 0.022                | 68.86                     | 47.39                 |
| 48105              | Crockett, TX              | -0.105               | 8.34                      | 68.92                 |

| <b>County FIPS</b> | <b>County Description</b> | <b>DOS-SVI Index</b> | <b>DOS-SVI Percentile</b> | <b>SVI Percentile</b> |
|--------------------|---------------------------|----------------------|---------------------------|-----------------------|
| 48107              | Crosby, TX                | 0.027                | 70.68                     | 93.95                 |
| 48109              | Culberson, TX             | -0.202               | 1.21                      | 99.71                 |
| 48111              | Dallam, TX                | -0.269               | 0.29                      | 55.03                 |
| 48113              | Dallas, TX                | -0.247               | 0.41                      | 75.38                 |
| 48115              | Dawson, TX                | 0.035                | 74.56                     | 94.75                 |
| 48117              | Deaf Smith, TX            | -0.193               | 1.56                      | 84.11                 |
| 48119              | Delta, TX                 | -0.004               | 52.56                     | 57.04                 |
| 48121              | Denton, TX                | -0.126               | 5.16                      | 22.1                  |
| 48123              | DeWitt, TX                | 0.095                | 91.02                     | 82.29                 |
| 48125              | Dickens, TX               | 0.139                | 95.26                     | 87.96                 |
| 48127              | Dimmit, TX                | -0.007               | 50.02                     | 99.97                 |
| 48129              | Donley, TX                | 0.073                | 86.82                     | 45.25                 |
| 48131              | Duval, TX                 | -0.067               | 17.57                     | 99.94                 |
| 48133              | Eastland, TX              | 0.044                | 78.51                     | 80.67                 |
| 48135              | Ector, TX                 | -0.131               | 4.55                      | 79.24                 |
| 48137              | Edwards, TX               | -0.063               | 19.52                     | 43.85                 |
| 48139              | Ellis, TX                 | -0.041               | 28.72                     | 39.24                 |
| 48141              | El Paso, TX               | -0.266               | 0.32                      | 95.35                 |
| 48143              | Erath, TX                 | -0.025               | 37.95                     | 62.52                 |
| 48145              | Falls, TX                 | 0.131                | 94.68                     | 97.99                 |
| 48147              | Fannin, TX                | 0.096                | 91.18                     | 57.58                 |
| 48149              | Fayette, TX               | -0.032               | 33.27                     | 43.63                 |
| 48151              | Fisher, TX                | -0.025               | 38.05                     | 43.12                 |
| 48153              | Floyd, TX                 | -0.02                | 41.99                     | 82.99                 |
| 48155              | Foard, TX                 | -0.004               | 52.66                     | 47.83                 |
| 48157              | Fort Bend, TX             | -0.086               | 12                        | 28.73                 |
| 48159              | Franklin, TX              | 0.036                | 75.2                      | 52.77                 |
| 48161              | Freestone, TX             | 0.046                | 79.11                     | 84.3                  |
| 48163              | Frio, TX                  | 0.043                | 77.87                     | 98.66                 |
| 48165              | Gaines, TX                | -0.025               | 37.63                     | 68.25                 |
| 48167              | Galveston, TX             | -0.096               | 10.06                     | 58.5                  |
| 48169              | Garza, TX                 | -0.017               | 43.59                     | 72.13                 |
| 48171              | Gillespie, TX             | 0.013                | 63.96                     | 35.73                 |
| 48173              | Glasscock, TX             | -0.123               | 5.6                       | 17.61                 |
| 48175              | Goliad, TX                | 0.006                | 59.28                     | 58.15                 |
| 48177              | Gonzales, TX              | 0.099                | 91.56                     | 89.59                 |
| 48179              | Gray, TX                  | 0.012                | 63.07                     | 84.46                 |
| 48181              | Grayson, TX               | -0.027               | 36.64                     | 65.92                 |
| 48183              | Gregg, TX                 | -0.098               | 9.55                      | 88.25                 |
| 48185              | Grimes, TX                | 0.087                | 89.65                     | 86.02                 |
| 48187              | Guadalupe, TX             | -0.058               | 21.55                     | 43.44                 |
| 48189              | Hale, TX                  | 0.016                | 65.42                     | 93.12                 |
| 48191              | Hall, TX                  | -0.125               | 5.25                      | 95                    |
| 48193              | Hamilton, TX              | -0.046               | 26.65                     | 60.83                 |
| 48195              | Hansford, TX              | -0.208               | 1.15                      | 76.15                 |
| 48197              | Hardeman, TX              | -0.049               | 24.83                     | 72.8                  |
| 48199              | Hardin, TX                | -0.001               | 54.98                     | 25.32                 |
| 48201              | Harris, TX                | -0.274               | 0.22                      | 72.36                 |
| 48203              | Harrison, TX              | 0.028                | 71.12                     | 73.06                 |
| 48205              | Hartley, TX               | 0.272                | 98.41                     | 53.44                 |
| 48207              | Haskell, TX               | -0.061               | 20.47                     | 97.55                 |
| 48209              | Hays, TX                  | -0.039               | 29.7                      | 49.24                 |
| 48211              | Hemphill, TX              | -0.015               | 44.51                     | 74.27                 |
| 48213              | Henderson, TX             | -0.01                | 48.23                     | 72.01                 |
| 48215              | Hidalgo, TX               | -0.115               | 6.53                      | 97.8                  |

| <b>County FIPS</b> | <b>County Description</b> | <b>DOS-SVI Index</b> | <b>DOS-SVI Percentile</b> | <b>SVI Percentile</b> |
|--------------------|---------------------------|----------------------|---------------------------|-----------------------|
| 48217              | Hill, TX                  | 0.068                | 85.86                     | 87.07                 |
| 48219              | Hockley, TX               | 0.028                | 71.09                     | 90.25                 |
| 48221              | Hood, TX                  | -0.019               | 42.47                     | 26.02                 |
| 48223              | Hopkins, TX               | -0.02                | 42.18                     | 70.67                 |
| 48225              | Houston, TX               | 0.073                | 87.04                     | 91.31                 |
| 48227              | Howard, TX                | -0.035               | 31.9                      | 91.53                 |
| 48229              | Hudspeth, TX              | -0.222               | 0.83                      | 98.25                 |
| 48231              | Hunt, TX                  | 0.056                | 82.23                     | 83.41                 |
| 48233              | Hutchinson, TX            | -0.055               | 22.7                      | 66.31                 |
| 48235              | Irion, TX                 | 0.042                | 77.65                     | 20.13                 |
| 48237              | Jack, TX                  | 0.13                 | 94.65                     | 65.38                 |
| 48239              | Jackson, TX               | 0.094                | 90.83                     | 67.74                 |
| 48241              | Jasper, TX                | 0.029                | 71.92                     | 82.39                 |
| 48243              | Jeff Davis, TX            | -0.028               | 36.33                     | 36.11                 |
| 48245              | Jefferson, TX             | -0.126               | 5.13                      | 85.67                 |
| 48247              | Jim Hogg, TX              | -0.043               | 27.92                     | 99.17                 |
| 48249              | Jim Wells, TX             | -0.047               | 25.72                     | 92.26                 |
| 48251              | Johnson, TX               | 0.004                | 58.29                     | 50.73                 |
| 48253              | Jones, TX                 | 0.319                | 98.89                     | 63.28                 |
| 48255              | Karnes, TX                | 0.093                | 90.67                     | 84.24                 |
| 48257              | Kaufman, TX               | -0.006               | 50.43                     | 56.91                 |
| 48259              | Kendall, TX               | -0.049               | 24.86                     | 22.83                 |
| 48261              | Kenedy, TX                | -0.335               | 0.1                       | 73.28                 |
| 48263              | Kent, TX                  | 0.05                 | 80.48                     | 44.27                 |
| 48265              | Kerr, TX                  | -0.045               | 26.84                     | 69.59                 |
| 48267              | Kimble, TX                | -0.169               | 2.29                      | 58.85                 |
| 48269              | King, TX                  | -0.1                 | 9.33                      | 19.55                 |
| 48271              | Kinney, TX                | -0.179               | 1.82                      | 85.61                 |
| 48273              | Kleberg, TX               | 0.025                | 70.3                      | 98.34                 |
| 48275              | Knox, TX                  | -0.052               | 23.62                     | 79.62                 |
| 48277              | Lamar, TX                 | -0.074               | 15.66                     | 83.57                 |
| 48279              | Lamb, TX                  | -0.211               | 0.99                      | 89.75                 |
| 48281              | Lampasas, TX              | 0.007                | 59.79                     | 54.43                 |
| 48283              | La Salle, TX              | 0.074                | 87.3                      | 81.91                 |
| 48285              | Lavaca, TX                | 0.144                | 95.51                     | 68.79                 |
| 48287              | Lee, TX                   | 0.006                | 59.73                     | 67.52                 |
| 48289              | Leon, TX                  | -0.02                | 41.55                     | 61.56                 |
| 48291              | Liberty, TX               | 0.121                | 94.08                     | 94.27                 |
| 48293              | Limestone, TX             | 0.012                | 63.26                     | 95.32                 |
| 48295              | Lipscomb, TX              | -0.02                | 41.58                     | 46.05                 |
| 48297              | Live Oak, TX              | 0.067                | 85.64                     | 69.17                 |
| 48299              | Llano, TX                 | 0.022                | 68.58                     | 46.66                 |
| 48301              | Loving, TX                | 0.607                | 99.75                     | 75.73                 |
| 48303              | Lubbock, TX               | -0.11                | 7.48                      | 74.97                 |
| 48305              | Lynn, TX                  | -0.077               | 14.71                     | 89.08                 |
| 48307              | McCulloch, TX             | -0.127               | 4.97                      | 73.95                 |
| 48309              | McLennan, TX              | -0.123               | 5.54                      | 84.36                 |
| 48311              | McMullen, TX              | 0.321                | 98.95                     | 76.31                 |
| 48313              | Madison, TX               | 0.328                | 99.05                     | 83.76                 |
| 48315              | Marion, TX                | 0.042                | 77.59                     | 68.85                 |
| 48317              | Martin, TX                | 0.081                | 88.7                      | 42.39                 |
| 48319              | Mason, TX                 | -0.132               | 4.42                      | 35.7                  |
| 48321              | Matagorda, TX             | -0.077               | 14.52                     | 90.67                 |
| 48323              | Maverick, TX              | -0.232               | 0.7                       | 97.42                 |
| 48325              | Medina, TX                | 0.003                | 57.53                     | 66.97                 |

| <b>County FIPS</b> | <b>County Description</b> | <b>DOS-SVI Index</b> | <b>DOS-SVI Percentile</b> | <b>SVI Percentile</b> |
|--------------------|---------------------------|----------------------|---------------------------|-----------------------|
| 48327              | Menard, TX                | -0.083               | 12.8                      | 58.54                 |
| 48329              | Midland, TX               | -0.038               | 30.72                     | 47.48                 |
| 48331              | Milam, TX                 | 0.044                | 78.35                     | 76.27                 |
| 48333              | Mills, TX                 | -0.105               | 8.21                      | 76.88                 |
| 48335              | Mitchell, TX              | 0.364                | 99.36                     | 62.13                 |
| 48337              | Montague, TX              | 0.004                | 57.85                     | 58.41                 |
| 48339              | Montgomery, TX            | -0.066               | 18.02                     | 39.14                 |
| 48341              | Moore, TX                 | -0.039               | 30.09                     | 69.9                  |
| 48343              | Morris, TX                | 0.061                | 84.08                     | 72.99                 |
| 48345              | Motley, TX                | 0.055                | 81.98                     | 70.03                 |
| 48347              | Nacogdoches, TX           | -0.007               | 49.92                     | 98.22                 |
| 48349              | Navarro, TX               | -0.064               | 19.39                     | 96.62                 |
| 48351              | Newton, TX                | -0.03                | 35.08                     | 72.07                 |
| 48353              | Nolan, TX                 | 0.061                | 84.05                     | 88.66                 |
| 48355              | Nueces, TX                | -0.061               | 20.38                     | 83.63                 |
| 48357              | Ochiltree, TX             | -0.01                | 48.14                     | 57.87                 |
| 48359              | Oldham, TX                | 0.415                | 99.49                     | 43.22                 |
| 48361              | Orange, TX                | 0.003                | 57.43                     | 58.12                 |
| 48363              | Palo Pinto, TX            | 0.014                | 64.44                     | 87.99                 |
| 48365              | Panola, TX                | 0.009                | 61.22                     | 69.52                 |
| 48367              | Parker, TX                | 0.062                | 84.34                     | 25.61                 |
| 48369              | Parmer, TX                | -0.007               | 49.76                     | 75.76                 |
| 48371              | Pecos, TX                 | 0.064                | 85.04                     | 82.13                 |
| 48373              | Polk, TX                  | 0.032                | 73.42                     | 91.21                 |
| 48375              | Potter, TX                | -0.069               | 17.29                     | 92.48                 |
| 48377              | Presidio, TX              | -0.351               | 0.06                      | 99.81                 |
| 48379              | Rains, TX                 | 0.076                | 87.58                     | 40.16                 |
| 48381              | Randall, TX               | -0.057               | 22.19                     | 22.04                 |
| 48383              | Reagan, TX                | -0.237               | 0.54                      | 48.06                 |
| 48385              | Real, TX                  | -0.078               | 14.33                     | 71.69                 |
| 48387              | Red River, TX             | -0.032               | 33.81                     | 56.5                  |
| 48389              | Reeves, TX                | 0.014                | 64.79                     | 78.03                 |
| 48391              | Refugio, TX               | -0.066               | 18.24                     | 94.14                 |
| 48393              | Roberts, TX               | -0.09                | 11.14                     | 9.11                  |
| 48395              | Robertson, TX             | 0.095                | 90.93                     | 75.29                 |
| 48397              | Rockwall, TX              | 0.009                | 61.6                      | 11.24                 |
| 48399              | Runnels, TX               | -0.105               | 8.25                      | 54.49                 |
| 48401              | Rusk, TX                  | 0.041                | 77.05                     | 79.65                 |
| 48403              | Sabine, TX                | -0.022               | 40.4                      | 53.09                 |
| 48405              | San Augustine, TX         | 0.038                | 76.34                     | 88.89                 |
| 48407              | San Jacinto, TX           | 0.074                | 87.23                     | 68.69                 |
| 48409              | San Patricio, TX          | 0.012                | 63.29                     | 83.09                 |
| 48411              | San Saba, TX              | 0.011                | 62.37                     | 73.15                 |
| 48413              | Schleicher, TX            | 0.122                | 94.11                     | 58.57                 |
| 48415              | Scurry, TX                | 0.185                | 97.33                     | 69.94                 |
| 48417              | Shackelford, TX           | 0.108                | 92.45                     | 68.5                  |
| 48419              | Shelby, TX                | -0.098               | 9.49                      | 95.22                 |
| 48421              | Sherman, TX               | -0.089               | 11.4                      | 46.11                 |
| 48423              | Smith, TX                 | -0.07                | 16.78                     | 74.62                 |
| 48425              | Somervell, TX             | 0.151                | 95.86                     | 56.05                 |
| 48427              | Starr, TX                 | -0.212               | 0.96                      | 98.15                 |
| 48429              | Stephens, TX              | -0.083               | 12.86                     | 88.5                  |
| 48431              | Sterling, TX              | -0.198               | 1.37                      | 41.27                 |
| 48433              | Stonewall, TX             | 0.06                 | 83.83                     | 32.36                 |
| 48435              | Sutton, TX                | -0.032               | 33.49                     | 60.41                 |

| <b>County FIPS</b> | <b>County Description</b> | <b>DOS-SVI Index</b> | <b>DOS-SVI Percentile</b> | <b>SVI Percentile</b> |
|--------------------|---------------------------|----------------------|---------------------------|-----------------------|
| 48437              | Swisher, TX               | 0.036                | 75.14                     | 97.01                 |
| 48439              | Tarrant, TX               | -0.152               | 3.25                      | 54.75                 |
| 48441              | Taylor, TX                | -0.073               | 15.92                     | 69.33                 |
| 48443              | Terrell, TX               | -0.181               | 1.78                      | 47.13                 |
| 48445              | Terry, TX                 | 0.002                | 57.08                     | 98.76                 |
| 48447              | Throckmorton, TX          | -0.133               | 4.33                      | 26.78                 |
| 48449              | Titus, TX                 | 0.002                | 56.7                      | 89.01                 |
| 48451              | Tom Green, TX             | -0.082               | 12.89                     | 66.43                 |
| 48453              | Travis, TX                | -0.177               | 2.01                      | 38.12                 |
| 48455              | Trinity, TX               | 0.015                | 65.27                     | 80.16                 |
| 48457              | Tyler, TX                 | 0.283                | 98.66                     | 88.34                 |
| 48459              | Upshur, TX                | 0.114                | 93.22                     | 58.98                 |
| 48461              | Upton, TX                 | -0.128               | 4.9                       | 65.19                 |
| 48463              | Uvalde, TX                | -0.151               | 3.38                      | 95.48                 |
| 48465              | Val Verde, TX             | -0.096               | 10.03                     | 96.78                 |
| 48467              | Van Zandt, TX             | 0.01                 | 62.21                     | 55.89                 |
| 48469              | Victoria, TX              | -0.005               | 51.16                     | 78.34                 |
| 48471              | Walker, TX                | 0.155                | 96.02                     | 69.97                 |
| 48473              | Waller, TX                | 0.116                | 93.47                     | 83.31                 |
| 48475              | Ward, TX                  | 0.025                | 69.95                     | 64.94                 |
| 48477              | Washington, TX            | 0.047                | 79.4                      | 73.12                 |
| 48479              | Webb, TX                  | -0.166               | 2.45                      | 94.97                 |
| 48481              | Wharton, TX               | -0.071               | 16.24                     | 87.58                 |
| 48483              | Wheeler, TX               | -0.017               | 43.84                     | 69.62                 |
| 48485              | Wichita, TX               | 0.017                | 66.41                     | 81.66                 |
| 48487              | Wilbarger, TX             | -0.074               | 15.57                     | 90.83                 |
| 48489              | Willacy, TX               | -0.019               | 42.41                     | 98.92                 |
| 48491              | Williamson, TX            | -0.098               | 9.52                      | 20.16                 |
| 48493              | Wilson, TX                | 0.093                | 90.64                     | 44.36                 |
| 48495              | Winkler, TX               | -0.163               | 2.64                      | 65.41                 |
| 48497              | Wise, TX                  | 0.015                | 65.08                     | 57.68                 |
| 48499              | Wood, TX                  | -0.024               | 39.22                     | 63.22                 |
| 48501              | Yoakum, TX                | 0.06                 | 83.41                     | 49.2                  |
| 48503              | Young, TX                 | -0.034               | 32.16                     | 55.32                 |
| 48505              | Zapata, TX                | 0.02                 | 67.81                     | 98.95                 |
| 48507              | Zavala, TX                | -0.194               | 1.47                      | 99.87                 |
| 49001              | Beaver, UT                | 0.176                | 96.94                     | 25.22                 |
| 49003              | Box Elder, UT             | 0.073                | 86.85                     | 15.92                 |
| 49005              | Cache, UT                 | 0.067                | 85.61                     | 32.01                 |
| 49007              | Carbon, UT                | 0.044                | 78.38                     | 56.15                 |
| 49009              | Daggett, UT               | 0.413                | 99.46                     | 7.55                  |
| 49011              | Davis, UT                 | 0.05                 | 80.45                     | 7.96                  |
| 49013              | Duchesne, UT              | 0.151                | 95.92                     | 48.22                 |
| 49015              | Emery, UT                 | 0.135                | 95.03                     | 26.27                 |
| 49017              | Garfield, UT              | 0.06                 | 83.44                     | 45.92                 |
| 49019              | Grand, UT                 | 0.112                | 92.96                     | 52.13                 |
| 49021              | Iron, UT                  | 0.026                | 70.58                     | 45.25                 |
| 49023              | Juab, UT                  | 0.19                 | 97.45                     | 23.31                 |
| 49025              | Kane, UT                  | 0.059                | 83.09                     | 10.54                 |
| 49027              | Millard, UT               | 0.06                 | 83.35                     | 35.54                 |
| 49029              | Morgan, UT                | 0.126                | 94.43                     | 0.03                  |
| 49031              | Piute, UT                 | 0.014                | 64.76                     | 27.13                 |
| 49033              | Rich, UT                  | 0.077                | 88.09                     | 19.71                 |
| 49035              | Salt Lake, UT             | -0.048               | 25.37                     | 32.29                 |
| 49037              | San Juan, UT              | 0.149                | 95.67                     | 97.52                 |

| <b>County FIPS</b> | <b>County Description</b> | <b>DOS-SVI Index</b> | <b>DOS-SVI Percentile</b> | <b>SVI Percentile</b> |
|--------------------|---------------------------|----------------------|---------------------------|-----------------------|
| 49039              | Sanpete, UT               | 0.292                | 98.73                     | 60.19                 |
| 49041              | Sevier, UT                | 0.035                | 74.69                     | 32.61                 |
| 49043              | Summit, UT                | -0.106               | 8.12                      | 5                     |
| 49045              | Tooele, UT                | 0.061                | 83.89                     | 31.43                 |
| 49047              | Uintah, UT                | 0.094                | 90.73                     | 48.38                 |
| 49049              | Utah, UT                  | 0.156                | 96.05                     | 27.8                  |
| 49051              | Wasatch, UT               | 0.1                  | 91.69                     | 6.43                  |
| 49053              | Washington, UT            | 0.121                | 94.05                     | 41.43                 |
| 49055              | Wayne, UT                 | 0.138                | 95.19                     | 29.08                 |
| 49057              | Weber, UT                 | -0.009               | 48.49                     | 42.71                 |
| 50001              | Addison, VT               | 0.071                | 86.6                      | 9.65                  |
| 50003              | Bennington, VT            | 0                    | 55.14                     | 29.24                 |
| 50005              | Caledonia, VT             | 0.036                | 75.45                     | 26.72                 |
| 50007              | Chittenden, VT            | 0.014                | 64.18                     | 18.31                 |
| 50009              | Essex, VT                 | -0.067               | 17.67                     | 20.67                 |
| 50011              | Franklin, VT              | 0.023                | 68.99                     | 11.11                 |
| 50013              | Grand Isle, VT            | -0.002               | 53.9                      | 0.25                  |
| 50015              | Lamoille, VT              | 0.038                | 76.25                     | 13.09                 |
| 50017              | Orange, VT                | 0.048                | 79.66                     | 17.2                  |
| 50019              | Orleans, VT               | 0                    | 55.65                     | 42.58                 |
| 50021              | Rutland, VT               | 0.175                | 96.88                     | 27.87                 |
| 50023              | Washington, VT            | -0.024               | 38.75                     | 17.52                 |
| 50025              | Windham, VT               | 0.034                | 74.18                     | 30.54                 |
| 50027              | Windsor, VT               | 0.001                | 56.29                     | 12.8                  |
| 51001              | Accomack, VA              | -0.08                | 13.47                     | 80.25                 |
| 51003              | Albemarle, VA             | -0.047               | 26.23                     | 17.32                 |
| 51005              | Alleghany, VA             | -0.044               | 27.7                      | 44.62                 |
| 51007              | Amelia, VA                | 0.007                | 60.17                     | 31.66                 |
| 51009              | Amherst, VA               | 0.028                | 71.6                      | 46.82                 |
| 51011              | Appomattox, VA            | -0.074               | 15.47                     | 36.37                 |
| 51013              | Arlington, VA             | -0.242               | 0.48                      | 14.01                 |
| 51015              | Augusta, VA               | 0.016                | 65.71                     | 14.9                  |
| 51017              | Bath, VA                  | 0.022                | 68.8                      | 24.71                 |
| 51019              | Bedford, VA               | -0.009               | 48.27                     | 9.84                  |
| 51021              | Bland, VA                 | 0.17                 | 96.75                     | 34.49                 |
| 51023              | Botetourt, VA             | -0.004               | 51.8                      | 4.14                  |
| 51025              | Brunswick, VA             | -0.038               | 30.37                     | 89.55                 |
| 51027              | Buchanan, VA              | -0.065               | 18.5                      | 75.45                 |
| 51029              | Buckingham, VA            | 0.037                | 75.77                     | 79.01                 |
| 51031              | Campbell, VA              | -0.065               | 18.46                     | 26.15                 |
| 51033              | Caroline, VA              | 0.06                 | 83.32                     | 34.81                 |
| 51035              | Carroll, VA               | -0.075               | 15.19                     | 33.69                 |
| 51036              | Charles City, VA          | -0.102               | 8.79                      | 23.66                 |
| 51037              | Charlotte, VA             | -0.105               | 8.37                      | 70.57                 |
| 51041              | Chesterfield, VA          | -0.107               | 7.96                      | 17.99                 |
| 51043              | Clarke, VA                | -0.077               | 14.45                     | 11.31                 |
| 51045              | Craig, VA                 | -0.01                | 47.5                      | 7.45                  |
| 51047              | Culpeper, VA              | 0.019                | 67.18                     | 48.82                 |
| 51049              | Cumberland, VA            | -0.074               | 15.54                     | 58.31                 |
| 51051              | Dickenson, VA             | -0.045               | 26.93                     | 68.06                 |
| 51053              | Dinwiddie, VA             | -0.053               | 23.56                     | 41.82                 |
| 51057              | Essex, VA                 | -0.124               | 5.35                      | 56.34                 |
| 51059              | Fairfax, VA               | -0.152               | 3.31                      | 18.76                 |
| 51061              | Fauquier, VA              | -0.057               | 22.25                     | 2.87                  |
| 51063              | Floyd, VA                 | -0.02                | 42.12                     | 11.15                 |



| <b>County FIPS</b> | <b>County Description</b> | <b>DOS-SVI Index</b> | <b>DOS-SVI Percentile</b> | <b>SVI Percentile</b> |
|--------------------|---------------------------|----------------------|---------------------------|-----------------------|
| 51065              | Fluvanna, VA              | 0.022                | 68.67                     | 6.31                  |
| 51067              | Franklin, VA              | -0.013               | 45.65                     | 40.1                  |
| 51069              | Frederick, VA             | -0.016               | 44.13                     | 18.22                 |
| 51071              | Giles, VA                 | -0.076               | 14.99                     | 27.42                 |
| 51073              | Gloucester, VA            | -0.023               | 39.99                     | 3.66                  |
| 51075              | Goochland, VA             | 0.027                | 70.9                      | 4.59                  |
| 51077              | Grayson, VA               | 0.018                | 66.64                     | 64.59                 |
| 51079              | Greene, VA                | 0.016                | 65.49                     | 16.31                 |
| 51081              | Greensville, VA           | 0.208                | 97.83                     | 81.4                  |
| 51083              | Halifax, VA               | -0.051               | 24.29                     | 67.23                 |
| 51085              | Hanover, VA               | -0.024               | 38.78                     | 1.56                  |
| 51087              | Henrico, VA               | -0.153               | 3.18                      | 25.73                 |
| 51089              | Henry, VA                 | -0.032               | 33.4                      | 88.57                 |
| 51091              | Highland, VA              | -0.064               | 19.32                     | 6.5                   |
| 51093              | Isle of Wight, VA         | -0.048               | 25.44                     | 33.92                 |
| 51095              | James City, VA            | -0.079               | 13.88                     | 11.5                  |
| 51097              | King and Queen, VA        | -0.047               | 26.04                     | 32.45                 |
| 51099              | King George, VA           | 0.002                | 56.8                      | 1.59                  |
| 51101              | King William, VA          | -0.025               | 37.76                     | 3.57                  |
| 51103              | Lancaster, VA             | -0.07                | 16.68                     | 15.83                 |
| 51105              | Lee, VA                   | 0.032                | 73.38                     | 80.73                 |
| 51107              | Loudoun, VA               | -0.084               | 12.61                     | 9.04                  |
| 51109              | Louisa, VA                | -0.007               | 50.27                     | 33.25                 |
| 51111              | Lunenburg, VA             | 0.014                | 64.25                     | 86.43                 |
| 51113              | Madison, VA               | 0.093                | 90.58                     | 16.4                  |
| 51115              | Mathews, VA               | -0.029               | 35.91                     | 2.07                  |
| 51117              | Mecklenburg, VA           | -0.079               | 14.07                     | 77.68                 |
| 51119              | Middlesex, VA             | 0.035                | 75.01                     | 20.25                 |
| 51121              | Montgomery, VA            | 0                    | 55.24                     | 29.59                 |
| 51125              | Nelson, VA                | -0.072               | 16.08                     | 30                    |
| 51127              | New Kent, VA              | 0.066                | 85.55                     | 0.61                  |
| 51131              | Northampton, VA           | -0.12                | 5.89                      | 67.64                 |
| 51133              | Northumberland, VA        | -0.108               | 7.9                       | 12.13                 |
| 51135              | Nottoway, VA              | 0.029                | 71.79                     | 90.96                 |
| 51137              | Orange, VA                | -0.023               | 39.32                     | 46.5                  |
| 51139              | Page, VA                  | -0.018               | 43.2                      | 39.36                 |
| 51141              | Patrick, VA               | -0.019               | 42.34                     | 63.89                 |
| 51143              | Pittsylvania, VA          | -0.055               | 22.67                     | 64.27                 |
| 51145              | Powhatan, VA              | 0.086                | 89.49                     | 0.57                  |
| 51147              | Prince Edward, VA         | 0.095                | 90.89                     | 72.96                 |
| 51149              | Prince George, VA         | 0.06                 | 83.67                     | 31.75                 |
| 51153              | Prince William, VA        | -0.128               | 4.87                      | 30.22                 |
| 51155              | Pulaski, VA               | -0.036               | 31.3                      | 48.31                 |
| 51157              | Rappahannock, VA          | -0.028               | 36.26                     | 2.13                  |
| 51159              | Richmond, VA              | 0.159                | 96.18                     | 61.43                 |
| 51161              | Roanoke, VA               | -0.08                | 13.53                     | 13.12                 |
| 51163              | Rockbridge, VA            | -0.053               | 23.24                     | 14.33                 |
| 51165              | Rockingham, VA            | 0.011                | 62.56                     | 31.97                 |
| 51167              | Russell, VA               | -0.032               | 33.43                     | 44.87                 |
| 51169              | Scott, VA                 | 0.046                | 78.92                     | 67.58                 |
| 51171              | Shenandoah, VA            | -0.055               | 22.8                      | 36.43                 |
| 51173              | Smyth, VA                 | -0.021               | 40.94                     | 75.48                 |
| 51175              | Southampton, VA           | -0.005               | 51.35                     | 47.55                 |
| 51177              | Spotsylvania, VA          | -0.049               | 25.15                     | 21.59                 |
| 51179              | Stafford, VA              | -0.072               | 15.95                     | 15.41                 |

| County FIPS | County Description           | DOS-SVI Index | DOS-SVI Percentile | SVI Percentile |
|-------------|------------------------------|---------------|--------------------|----------------|
| 51181       | Surry, VA                    | -0.039        | 29.83              | 36.59          |
| 51183       | Sussex, VA                   | 0.198         | 97.68              | 90.92          |
| 51185       | Tazewell, VA                 | 0.029         | 72.08              | 59.36          |
| 51187       | Warren, VA                   | -0.022        | 40.56              | 25.64          |
| 51191       | Washington, VA               | -0.021        | 40.97              | 36.46          |
| 51193       | Westmoreland, VA             | -0.029        | 35.78              | 29.2           |
| 51195       | Wise, VA                     | 0.009         | 61.64              | 85.99          |
| 51197       | Wythe, VA                    | -0.013        | 45.91              | 39.65          |
| 51199       | York, VA                     | -0.078        | 14.23              | 19.97          |
| 51510       | Alexandria City, VA          | -0.293        | 0.19               | 20.03          |
| 51520       | Bristol City, VA             | -0.153        | 3.15               | 75.1           |
| 51530       | Buena Vista City, VA         | -0.077        | 14.74              | 32.42          |
| 51540       | Charlottesville City,<br>VA  | -0.089        | 11.33              | 40.92          |
| 51550       | Chesapeake City, VA          | -0.084        | 12.45              | 25.92          |
| 51570       | Colonial Heights City,<br>VA | -0.096        | 9.96               | 56.85          |
| 51580       | Covington City, VA           | 0.053         | 81.47              | 46.34          |
| 51590       | Danville City, VA            | -0.1          | 9.27               | 95.89          |
| 51595       | Emporia City, VA             | -0.111        | 7.26               | 95.67          |
| 51600       | Fairfax City, VA             | -0.066        | 17.92              | 24.11          |
| 51610       | Falls Church City, VA        | -0.154        | 3.06               | 13.89          |
| 51620       | Franklin City, VA            | -0.213        | 0.92               | 71.75          |
| 51630       | Fredericksburg City,<br>VA   | -0.156        | 2.96               | 56.31          |
| 51640       | Galax City, VA               | -0.149        | 3.57               | 98.38          |
| 51650       | Hampton City, VA             | -0.105        | 8.31               | 66.75          |
| 51660       | Harrisonburg City, VA        | -0.085        | 12.35              | 79.3           |
| 51670       | Hopewell City, VA            | -0.137        | 4.2                | 94.08          |
| 51678       | Lexington City, VA           | 0.43          | 99.52              | 32.26          |
| 51680       | Lynchburg City, VA           | -0.001        | 54.79              | 73.69          |
| 51683       | Manassas City, VA            | -0.204        | 1.18               | 44.46          |
| 51685       | Manassas Park City,<br>VA    | -0.305        | 0.13               | 52.8           |
| 51690       | Martinsville City, VA        | -0.21         | 1.05               | 91.05          |
| 51700       | Newport News City,<br>VA     | -0.102        | 8.76               | 81.56          |
| 51710       | Norfolk City, VA             | -0.051        | 24.32              | 77.17          |
| 51720       | Norton City, VA              | -0.125        | 5.22               | 90.54          |
| 51730       | Petersburg City, VA          | -0.174        | 2.1                | 96.43          |
| 51735       | Poquoson City, VA            | -0.026        | 37.47              | 1.27           |
| 51740       | Portsmouth City, VA          | -0.085        | 12.32              | 80.06          |
| 51750       | Radford City, VA             | 0.006         | 59.41              | 41.24          |
| 51760       | Richmond City, VA            | -0.16         | 2.77               | 77.29          |
| 51770       | Roanoke City, VA             | -0.136        | 4.23               | 80.38          |
| 51775       | Salem City, VA               | -0.038        | 30.63              | 30.89          |
| 51790       | Staunton City, VA            | -0.084        | 12.51              | 44.49          |
| 51800       | Suffolk City, VA             | -0.089        | 11.37              | 34.68          |
| 51810       | Virginia Beach City,<br>VA   | -0.108        | 7.8                | 18.89          |
| 51820       | Waynesboro City, VA          | -0.132        | 4.39               | 60.13          |
| 51830       | Williamsburg City, VA        | 0.178         | 97.07              | 38.5           |
| 51840       | Winchester City, VA          | -0.144        | 3.92               | 72.2           |
| 53001       | Adams, WA                    | 0.011         | 62.78              | 96.21          |
| 53003       | Asotin, WA                   | -0.029        | 35.53              | 42.48          |

| <b>County FIPS</b> | <b>County Description</b> | <b>DOS-SVI Index</b> | <b>DOS-SVI Percentile</b> | <b>SVI Percentile</b> |
|--------------------|---------------------------|----------------------|---------------------------|-----------------------|
| 53005              | Benton, WA                | -0.065               | 18.59                     | 51.4                  |
| 53007              | Chelan, WA                | -0.098               | 9.58                      | 67.8                  |
| 53009              | Clallam, WA               | -0.014               | 45.24                     | 61.46                 |
| 53011              | Clark, WA                 | -0.017               | 43.9                      | 28.57                 |
| 53013              | Columbia, WA              | -0.005               | 51.19                     | 31.46                 |
| 53015              | Cowlitz, WA               | -0.025               | 38.24                     | 78.85                 |
| 53017              | Douglas, WA               | -0.027               | 36.55                     | 77.07                 |
| 53019              | Ferry, WA                 | 0.065                | 85.32                     | 82.23                 |
| 53021              | Franklin, WA              | -0.037               | 31.07                     | 86.91                 |
| 53023              | Garfield, WA              | 0.025                | 70.01                     | 18.34                 |
| 53025              | Grant, WA                 | -0.077               | 14.68                     | 84.52                 |
| 53027              | Grays Harbor, WA          | -0.007               | 49.73                     | 83.92                 |
| 53029              | Island, WA                | 0.008                | 60.55                     | 18.57                 |
| 53031              | Jefferson, WA             | -0.008               | 49.19                     | 24.14                 |
| 53033              | King, WA                  | -0.095               | 10.28                     | 28.54                 |
| 53035              | Kitsap, WA                | -0.022               | 40.66                     | 28.25                 |
| 53037              | Kittitas, WA              | -0.002               | 53.74                     | 28.31                 |
| 53039              | Klickitat, WA             | 0.087                | 89.56                     | 57.23                 |
| 53041              | Lewis, WA                 | 0.006                | 59.6                      | 78.89                 |
| 53043              | Lincoln, WA               | -0.008               | 49.25                     | 19.84                 |
| 53045              | Mason, WA                 | -0.003               | 53.42                     | 63.82                 |
| 53047              | Okanogan, WA              | -0.067               | 17.64                     | 92.55                 |
| 53049              | Pacific, WA               | -0.111               | 7.32                      | 73.6                  |
| 53051              | Pend Oreille, WA          | 0.074                | 87.11                     | 53.6                  |
| 53053              | Pierce, WA                | -0.054               | 23.08                     | 48.73                 |
| 53055              | San Juan, WA              | 0.044                | 78.45                     | 8.63                  |
| 53057              | Skagit, WA                | 0.04                 | 76.89                     | 53.82                 |
| 53059              | Skamania, WA              | 0.058                | 82.81                     | 21.94                 |
| 53061              | Snohomish, WA             | -0.058               | 21.59                     | 27.55                 |
| 53063              | Spokane, WA               | -0.06                | 20.57                     | 48.25                 |
| 53065              | Stevens, WA               | 0.031                | 72.78                     | 46.15                 |
| 53067              | Thurston, WA              | -0.042               | 28.68                     | 32.99                 |
| 53069              | Wahkiakum, WA             | -0.007               | 49.86                     | 18.09                 |
| 53071              | Walla Walla, WA           | 0.028                | 71.51                     | 68.31                 |
| 53073              | Whatcom, WA               | -0.008               | 49.09                     | 45.41                 |
| 53075              | Whitman, WA               | 0.064                | 84.78                     | 51.08                 |
| 53077              | Yakima, WA                | -0.073               | 15.82                     | 92.77                 |
| 54001              | Barbour, WV               | 0.03                 | 72.4                      | 65.13                 |
| 54003              | Berkeley, WV              | -0.012               | 46.55                     | 44.33                 |
| 54005              | Boone, WV                 | 0.013                | 63.74                     | 70.41                 |
| 54007              | Braxton, WV               | 0.105                | 92.23                     | 66.46                 |
| 54009              | Brooke, WV                | 0.052                | 81.25                     | 33.06                 |
| 54011              | Cabell, WV                | -0.049               | 25.28                     | 62.45                 |
| 54013              | Calhoun, WV               | 0.005                | 58.93                     | 52.39                 |
| 54015              | Clay, WV                  | 0.003                | 57.75                     | 68.85                 |
| 54017              | Doddridge, WV             | 0.104                | 92.1                      | 36.08                 |
| 54019              | Fayette, WV               | -0.003               | 52.82                     | 76.4                  |
| 54021              | Gilmer, WV                | 0.17                 | 96.72                     | 75.64                 |
| 54023              | Grant, WV                 | -0.001               | 54.7                      | 36.75                 |
| 54025              | Greenbrier, WV            | 0.001                | 56.51                     | 55.57                 |
| 54027              | Hampshire, WV             | -0.004               | 52.75                     | 64.33                 |
| 54029              | Hancock, WV               | -0.002               | 54                        | 40.51                 |
| 54031              | Hardy, WV                 | -0.123               | 5.63                      | 28.5                  |
| 54033              | Harrison, WV              | 0.03                 | 72.33                     | 40.89                 |
| 54035              | Jackson, WV               | 0.054                | 81.82                     | 25.29                 |

| <b>County FIPS</b> | <b>County Description</b> | <b>DOS-SVI Index</b> | <b>DOS-SVI Percentile</b> | <b>SVI Percentile</b> |
|--------------------|---------------------------|----------------------|---------------------------|-----------------------|
| 54037              | Jefferson, WV             | 0.027                | 70.84                     | 22.55                 |
| 54039              | Kanawha, WV               | -0.045               | 27.28                     | 56.56                 |
| 54041              | Lewis, WV                 | 0.006                | 59.44                     | 67.61                 |
| 54043              | Lincoln, WV               | 0.06                 | 83.51                     | 60.57                 |
| 54045              | Logan, WV                 | 0.015                | 65.36                     | 74.71                 |
| 54047              | McDowell, WV              | 0.049                | 80.29                     | 90.29                 |
| 54049              | Marion, WV                | 0.018                | 66.48                     | 49.39                 |
| 54051              | Marshall, WV              | 0.029                | 72.05                     | 21.53                 |
| 54053              | Mason, WV                 | 0.076                | 87.49                     | 54.97                 |
| 54055              | Mercer, WV                | -0.08                | 13.79                     | 80.89                 |
| 54057              | Mineral, WV               | -0.035               | 32.06                     | 59.33                 |
| 54059              | Mingo, WV                 | 0.013                | 63.93                     | 78.5                  |
| 54061              | Monongalia, WV            | 0.064                | 84.85                     | 41.11                 |
| 54063              | Monroe, WV                | -0.027               | 37.06                     | 46.62                 |
| 54065              | Morgan, WV                | 0.114                | 93.25                     | 17.64                 |
| 54067              | Nicholas, WV              | 0.034                | 74.05                     | 54.11                 |
| 54069              | Ohio, WV                  | 0.042                | 77.71                     | 31.08                 |
| 54071              | Pendleton, WV             | -0.025               | 38.4                      | 35.8                  |
| 54073              | Pleasants, WV             | 0.052                | 81.18                     | 44.68                 |
| 54075              | Pocahontas, WV            | -0.089               | 11.43                     | 49.71                 |
| 54077              | Preston, WV               | 0.126                | 94.46                     | 57.32                 |
| 54079              | Putnam, WV                | 0.001                | 56                        | 4.08                  |
| 54081              | Raleigh, WV               | -0.004               | 52.12                     | 76.85                 |
| 54083              | Randolph, WV              | 0.058                | 82.9                      | 58.06                 |
| 54085              | Ritchie, WV               | -0.032               | 33.24                     | 36.4                  |
| 54087              | Roane, WV                 | 0.005                | 59.03                     | 64.65                 |
| 54089              | Summers, WV               | 0.041                | 77.27                     | 82.9                  |
| 54091              | Taylor, WV                | -0.004               | 52.53                     | 49.49                 |
| 54093              | Tucker, WV                | -0.003               | 53.45                     | 36.72                 |
| 54095              | Tyler, WV                 | -0.001               | 54.28                     | 22.13                 |
| 54097              | Upshur, WV                | 0.027                | 70.71                     | 69.11                 |
| 54099              | Wayne, WV                 | -0.023               | 39.8                      | 60.06                 |
| 54101              | Webster, WV               | -0.058               | 21.65                     | 74.87                 |
| 54103              | Wetzel, WV                | -0.041               | 28.84                     | 47.52                 |
| 54105              | Wirt, WV                  | -0.061               | 20.44                     | 37.48                 |
| 54107              | Wood, WV                  | -0.021               | 41.13                     | 37.23                 |
| 54109              | Wyoming, WV               | 0.037                | 75.55                     | 64.43                 |
| 55001              | Adams, WI                 | 0.041                | 77.3                      | 56.85                 |
| 55003              | Ashland, WI               | 0.037                | 75.64                     | 55                    |
| 55005              | Barron, WI                | 0.01                 | 61.86                     | 32.71                 |
| 55007              | Bayfield, WI              | 0.008                | 60.87                     | 9.9                   |
| 55009              | Brown, WI                 | -0.06                | 20.76                     | 32.99                 |
| 55011              | Buffalo, WI               | -0.025               | 38.3                      | 5.76                  |
| 55013              | Burnett, WI               | -0.045               | 26.87                     | 16.72                 |
| 55015              | Calumet, WI               | -0.008               | 49.12                     | 1.82                  |
| 55017              | Chippewa, WI              | 0.018                | 66.79                     | 21.05                 |
| 55019              | Clark, WI                 | 0.107                | 92.39                     | 53.5                  |
| 55021              | Columbia, WI              | -0.006               | 50.46                     | 12.04                 |
| 55023              | Crawford, WI              | 0.039                | 76.57                     | 39.71                 |
| 55025              | Dane, WI                  | -0.1                 | 9.3                       | 16.88                 |
| 55027              | Dodge, WI                 | 0.003                | 57.66                     | 20.19                 |
| 55029              | Door, WI                  | -0.043               | 28.05                     | 5.57                  |
| 55031              | Douglas, WI               | -0.004               | 52.69                     | 27.48                 |
| 55033              | Dunn, WI                  | 0.088                | 90                        | 18.47                 |
| 55035              | Eau Claire, WI            | 0.004                | 58.33                     | 21.75                 |

| <b>County FIPS</b> | <b>County Description</b> | <b>DOS-SVI Index</b> | <b>DOS-SVI Percentile</b> | <b>SVI Percentile</b> |
|--------------------|---------------------------|----------------------|---------------------------|-----------------------|
| 55037              | Florence, WI              | 0.087                | 89.59                     | 14.52                 |
| 55039              | Fond du Lac, WI           | -0.002               | 53.8                      | 20.38                 |
| 55041              | Forest, WI                | -0.017               | 43.68                     | 57.74                 |
| 55043              | Grant, WI                 | 0.077                | 88.06                     | 19.39                 |
| 55045              | Green, WI                 | -0.038               | 30.53                     | 5.29                  |
| 55047              | Green Lake, WI            | 0.015                | 65.2                      | 28.69                 |
| 55049              | Iowa, WI                  | 0.01                 | 61.83                     | 1.31                  |
| 55051              | Iron, WI                  | 0.005                | 58.52                     | 36.02                 |
| 55053              | Jackson, WI               | 0.078                | 88.25                     | 50.03                 |
| 55055              | Jefferson, WI             | 0.008                | 60.36                     | 18.54                 |
| 55057              | Juneau, WI                | 0.06                 | 83.86                     | 37.8                  |
| 55059              | Kenosha, WI               | -0.073               | 15.73                     | 51.11                 |
| 55061              | Kewaunee, WI              | 0.021                | 68.29                     | 5.86                  |
| 55063              | La Crosse, WI             | -0.019               | 42.31                     | 20.89                 |
| 55065              | Lafayette, WI             | 0.001                | 56.45                     | 15.96                 |
| 55067              | Langlade, WI              | -0.033               | 32.95                     | 35.35                 |
| 55069              | Lincoln, WI               | 0.001                | 55.94                     | 10.13                 |
| 55071              | Manitowoc, WI             | -0.03                | 34.48                     | 16.21                 |
| 55073              | Marathon, WI              | 0.009                | 61.35                     | 14.43                 |
| 55075              | Marinette, WI             | -0.014               | 44.99                     | 29.71                 |
| 55077              | Marquette, WI             | 0.017                | 65.93                     | 25.96                 |
| 55078              | Menominee, WI             | 0.018                | 66.83                     | 76.72                 |
| 55079              | Milwaukee, WI             | -0.159               | 2.87                      | 80.61                 |
| 55081              | Monroe, WI                | -0.006               | 50.81                     | 46.21                 |
| 55083              | Oconto, WI                | 0.011                | 62.43                     | 6.4                   |
| 55085              | Oneida, WI                | -0.005               | 51.26                     | 1.4                   |
| 55087              | Outagamie, WI             | -0.025               | 37.7                      | 9.78                  |
| 55089              | Ozaukee, WI               | -0.02                | 41.64                     | 1.34                  |
| 55091              | Pepin, WI                 | -0.022               | 40.47                     | 10.19                 |
| 55093              | Pierce, WI                | 0.03                 | 72.36                     | 8.06                  |
| 55095              | Polk, WI                  | -0.02                | 41.67                     | 8.73                  |
| 55097              | Portage, WI               | 0.019                | 67.02                     | 16.53                 |
| 55099              | Price, WI                 | 0.007                | 60.2                      | 16.02                 |
| 55101              | Racine, WI                | -0.109               | 7.64                      | 45.51                 |
| 55103              | Richland, WI              | -0.004               | 52.18                     | 30.73                 |
| 55105              | Rock, WI                  | -0.073               | 15.86                     | 45.61                 |
| 55107              | Rusk, WI                  | -0.01                | 48.11                     | 34.65                 |
| 55109              | St. Croix, WI             | -0.004               | 51.73                     | 1.46                  |
| 55111              | Sauk, WI                  | -0.035               | 31.68                     | 23.44                 |
| 55113              | Sawyer, WI                | -0.011               | 47.12                     | 42.68                 |
| 55115              | Shawano, WI               | -0.004               | 51.83                     | 13.82                 |
| 55117              | Sheboygan, WI             | 0.001                | 56.1                      | 22.45                 |
| 55119              | Taylor, WI                | 0.019                | 67.24                     | 20                    |
| 55121              | Trempealeau, WI           | 0.005                | 58.74                     | 28.12                 |
| 55123              | Vernon, WI                | 0.1                  | 91.63                     | 38.34                 |
| 55125              | Vilas, WI                 | -0.039               | 30.02                     | 13.95                 |
| 55127              | Walworth, WI              | -0.035               | 31.52                     | 26.88                 |
| 55129              | Washburn, WI              | -0.002               | 53.55                     | 10.8                  |
| 55131              | Washington, WI            | -0.048               | 25.63                     | 0.99                  |
| 55133              | Waukesha, WI              | -0.034               | 32.41                     | 1.94                  |
| 55135              | Waupaca, WI               | -0.03                | 35.31                     | 18.15                 |
| 55137              | Waushara, WI              | 0.027                | 70.65                     | 36.53                 |
| 55139              | Winnebago, WI             | -0.045               | 27.35                     | 16.08                 |
| 55141              | Wood, WI                  | -0.053               | 23.34                     | 15.35                 |
| 56001              | Albany, WY                | 0.057                | 82.74                     | 24.94                 |

| <b>County FIPS</b> | <b>County Description</b> | <b>DOS-SVI Index</b> | <b>DOS-SVI Percentile</b> | <b>SVI Percentile</b> |
|--------------------|---------------------------|----------------------|---------------------------|-----------------------|
| 56003              | Big Horn, WY              | 0.065                | 85.23                     | 39.55                 |
| 56005              | Campbell, WY              | 0.034                | 74.15                     | 33.15                 |
| 56007              | Carbon, WY                | 0.02                 | 67.88                     | 50.29                 |
| 56009              | Converse, WY              | 0.044                | 78.48                     | 20.48                 |
| 56011              | Crook, WY                 | 0.129                | 94.59                     | 3.28                  |
| 56013              | Fremont, WY               | 0.078                | 88.16                     | 56.24                 |
| 56015              | Goshen, WY                | -0.014               | 44.73                     | 32.64                 |
| 56017              | Hot Springs, WY           | 0.025                | 70.11                     | 12.29                 |
| 56019              | Johnson, WY               | 0.003                | 57.78                     | 17.74                 |
| 56021              | Laramie, WY               | -0.019               | 42.63                     | 26.97                 |
| 56023              | Lincoln, WY               | 0.077                | 88.03                     | 8.09                  |
| 56025              | Natrona, WY               | -0.051               | 24.26                     | 29.52                 |
| 56027              | Niobrara, WY              | 0.108                | 92.49                     | 33.6                  |
| 56029              | Park, WY                  | 0.035                | 75.04                     | 6.59                  |
| 56031              | Platte, WY                | -0.061               | 20.09                     | 9.52                  |
| 56033              | Sheridan, WY              | 0.028                | 71.06                     | 8.95                  |
| 56035              | Sublette, WY              | -0.012               | 46.51                     | 2.93                  |
| 56037              | Sweetwater, WY            | -0.041               | 29.07                     | 37.01                 |
| 56039              | Teton, WY                 | 0.161                | 96.37                     | 11.27                 |
| 56041              | Uinta, WY                 | 0.083                | 88.98                     | 45.22                 |
| 56043              | Washakie, WY              | 0.04                 | 76.76                     | 37.32                 |
| 56045              | Weston, WY                | 0.049                | 80.1                      | 34.75                 |

Appendix Table 6: PN DOS-SVI and CDC SVI Percentiles by County

| County FIPS | County Description | DOS-SVI Index | DOS-SVI Percentile | SVI Percentile |
|-------------|--------------------|---------------|--------------------|----------------|
| 01001       | Autauga, AL        | -0.089        | 19.8               | 43.54          |
| 01003       | Baldwin, AL        | -0.215        | 0.76               | 21.62          |
| 01005       | Barbour, AL        | 0.131         | 90.48              | 99.59          |
| 01007       | Bibb, AL           | 0.046         | 77.24              | 60.03          |
| 01009       | Blount, AL         | -0.088        | 20.57              | 42.42          |
| 01011       | Bullock, AL        | -0.042        | 41.74              | 88.98          |
| 01013       | Butler, AL         | 0             | 62.3               | 86.53          |
| 01015       | Calhoun, AL        | -0.054        | 35.94              | 82.52          |
| 01017       | Chambers, AL       | 0.003         | 63.39              | 73.82          |
| 01019       | Cherokee, AL       | -0.092        | 18.5               | 45.16          |
| 01021       | Chilton, AL        | -0.003        | 60.9               | 76.02          |
| 01023       | Choctaw, AL        | -0.001        | 61.76              | 87.48          |
| 01025       | Clarke, AL         | 0.126         | 90.16              | 84.71          |
| 01027       | Clay, AL           | -0.124        | 8.05               | 56.4           |
| 01029       | Cleburne, AL       | -0.124        | 8.09               | 54.17          |
| 01031       | Coffee, AL         | -0.055        | 35.4               | 54.08          |
| 01033       | Colbert, AL        | -0.136        | 5.89               | 42.74          |
| 01035       | Conecuh, AL        | -0.03         | 48.49              | 80.86          |
| 01037       | Coosa, AL          | -0.085        | 21.17              | 52.61          |
| 01039       | Covington, AL      | -0.011        | 57.43              | 77.23          |
| 01041       | Crenshaw, AL       | -0.109        | 12.03              | 68.73          |
| 01043       | Cullman, AL        | -0.073        | 26.23              | 51.82          |
| 01045       | Dale, AL           | -0.007        | 59.44              | 75.99          |
| 01047       | Dallas, AL         | 0.167         | 93.09              | 94.9           |
| 01049       | DeKalb, AL         | -0.086        | 21.14              | 80.22          |
| 01051       | Elmore, AL         | -0.021        | 52.79              | 54.01          |
| 01053       | Escambia, AL       | 0.106         | 87.68              | 85.57          |
| 01055       | Etowah, AL         | -0.105        | 13.31              | 65.64          |
| 01057       | Fayette, AL        | -0.092        | 18.46              | 70.38          |
| 01059       | Franklin, AL       | -0.079        | 23.56              | 84.17          |
| 01061       | Geneva, AL         | -0.056        | 34.99              | 79.55          |
| 01063       | Greene, AL         | 0.142         | 91.44              | 98.54          |
| 01065       | Hale, AL           | 0.182         | 93.86              | 95.99          |
| 01067       | Henry, AL          | -0.069        | 28.14              | 55.19          |
| 01069       | Houston, AL        | -0.098        | 15.82              | 68.38          |
| 01071       | Jackson, AL        | -0.054        | 35.63              | 57.26          |
| 01073       | Jefferson, AL      | -0.11         | 11.84              | 66.21          |
| 01075       | Lamar, AL          | -0.025        | 50.43              | 62.64          |
| 01077       | Lauderdale, AL     | -0.069        | 28.02              | 44.68          |
| 01079       | Lawrence, AL       | -0.089        | 19.52              | 49.52          |
| 01081       | Lee, AL            | -0.048        | 38.87              | 66.02          |
| 01083       | Limestone, AL      | -0.046        | 39.67              | 52.96          |
| 01085       | Lowndes, AL        | 0.056         | 79.18              | 91.88          |
| 01087       | Macon, AL          | 0.202         | 94.87              | 89.71          |
| 01089       | Madison, AL        | -0.104        | 13.82              | 30.76          |
| 01091       | Marengo, AL        | -0.007        | 59.41              | 76.21          |
| 01093       | Marion, AL         | -0.097        | 16.68              | 67.1           |
| 01095       | Marshall, AL       | -0.088        | 20.22              | 72.61          |
| 01097       | Mobile, AL         | -0.07         | 27.73              | 75.32          |
| 01099       | Monroe, AL         | 0.125         | 89.94              | 74.81          |
| 01101       | Montgomery, AL     | -0.057        | 33.97              | 84.27          |
| 01103       | Morgan, AL         | -0.082        | 22.6               | 68.95          |
| 01105       | Perry, AL          | 0.134         | 90.8               | 99.49          |
| 01107       | Pickens, AL        | 0.038         | 74.88              | 92.07          |

| County FIPS | County Description               | DOS-SVI Index | DOS-SVI Percentile | SVI Percentile |
|-------------|----------------------------------|---------------|--------------------|----------------|
| 01109       | Pike, AL                         | -0.025        | 50.49              | 90.16          |
| 01111       | Randolph, AL                     | 0.036         | 74.24              | 71.91          |
| 01113       | Russell, AL                      | 0.063         | 80.96              | 91.15          |
| 01115       | St. Clair, AL                    | -0.091        | 19.04              | 36.56          |
| 01117       | Shelby, AL                       | -0.114        | 10.7               | 11.69          |
| 01119       | Sumter, AL                       | 0.098         | 86.47              | 95.57          |
| 01121       | Talladega, AL                    | -0.007        | 59.38              | 87.36          |
| 01123       | Tallapoosa, AL                   | 0.077         | 83.86              | 88.63          |
| 01125       | Tuscaloosa, AL                   | -0.125        | 7.67               | 62.55          |
| 01127       | Walker, AL                       | -0.03         | 48.36              | 74.52          |
| 01129       | Washington, AL                   | 0.007         | 65.04              | 73.03          |
| 01131       | Wilcox, AL                       | 0.182         | 93.79              | 92.8           |
| 01133       | Winston, AL                      | -0.099        | 15.76              | 70.25          |
| 02013       | Aleutians East, AK               | 0.415         | 98.69              | 58.03          |
| 02016       | Aleutians West, AK               | 0.605         | 99.3               | 49.27          |
| 02020       | Anchorage, AK                    | 0.088         | 85.23              | 46.02          |
| 02050       | Bethel, AK                       | 2.636         | 99.94              | 97.48          |
| 02060       | Bristol Bay, AK                  | 0.36          | 98.38              | 35.25          |
| 02068       | Denali, AK                       | 0.356         | 98.31              | 10.1           |
| 02070       | Dillingham, AK                   | 1.718         | 99.81              | 86.82          |
| 02090       | Fairbanks North Star,<br>AK      | 0.25          | 96.28              | 34.46          |
| 02100       | Haines, AK                       | 0.426         | 98.82              | 20.7           |
| 02105       | Hoonah-Angoon, AK                | 0.581         | 99.27              | 41.78          |
| 02110       | Juneau City and<br>Borough, AK   | 0.156         | 92.36              | 29.87          |
| 02122       | Kenai Peninsula, AK              | 0.211         | 95.35              | 40.73          |
| 02130       | Ketchikan Gateway,<br>AK         | 0.123         | 89.56              | 55.48          |
| 02150       | Kodiak Island, AK                | 0.304         | 97.55              | 70.06          |
| 02158       | Kusilvak, AK                     | 3.907         | 100                | 93.34          |
| 02164       | Lake and Peninsula, AK           | 1.074         | 99.75              | 79.78          |
| 02170       | Matanuska-Susitna, AK            | 0.228         | 95.64              | 31.72          |
| 02180       | Nome, AK                         | 2.383         | 99.87              | 92.99          |
| 02185       | North Slope, AK                  | 2.408         | 99.9               | 73.44          |
| 02188       | Northwest Arctic, AK             | 2.764         | 99.97              | 93.54          |
| 02195       | Petersburg, AK                   | 0.163         | 92.81              | 66.5           |
| 02198       | Prince of Wales-Hyder,<br>AK     | 0.366         | 98.47              | 76.62          |
| 02220       | Sitka City and Borough,<br>AK    | 0.16          | 92.58              | 40.22          |
| 02230       | Skagway, AK                      | 0.338         | 98.15              | 16.85          |
| 02240       | Southeast Fairbanks,<br>AK       | 0.467         | 98.92              | 58.38          |
| 02261       | Valdez-Cordova, AK               | 0.11          | 88.06              | 27.04          |
| 02275       | Wrangell City and<br>Borough, AK | 0.122         | 89.46              | 56.18          |
| 02282       | Yakutat City and<br>Borough, AK  | 0.48          | 99.01              | 58.73          |
| 02290       | Yukon-Koyukuk, AK                | 1.594         | 99.78              | 88.12          |
| 04001       | Apache, AZ                       | 0.668         | 99.46              | 98.85          |
| 04003       | Cochise, AZ                      | -0.015        | 55.81              | 90.64          |
| 04005       | Coconino, AZ                     | 0.313         | 97.71              | 71.31          |
| 04007       | Gila, AZ                         | 0.114         | 88.38              | 89.9           |
| 04009       | Graham, AZ                       | 0.364         | 98.44              | 96.4           |



| <b>County FIPS</b> | <b>County Description</b> | <b>DOS-SVI Index</b> | <b>DOS-SVI Percentile</b> | <b>SVI Percentile</b> |
|--------------------|---------------------------|----------------------|---------------------------|-----------------------|
| 04011              | Greenlee, AZ              | 0.1                  | 86.66                     | 61.88                 |
| 04012              | La Paz, AZ                | 0.123                | 89.65                     | 92.36                 |
| 04013              | Maricopa, AZ              | -0.033               | 47.18                     | 63.54                 |
| 04015              | Mohave, AZ                | 0.051                | 78.35                     | 86.24                 |
| 04017              | Navajo, AZ                | 0.475                | 98.98                     | 99.55                 |
| 04019              | Pima, AZ                  | 0.002                | 63.13                     | 88.28                 |
| 04021              | Pinal, AZ                 | 0.128                | 90.29                     | 85.92                 |
| 04023              | Santa Cruz, AZ            | -0.075               | 25.34                     | 93.18                 |
| 04025              | Yavapai, AZ               | 0.002                | 63.16                     | 52.1                  |
| 04027              | Yuma, AZ                  | 0.103                | 87.04                     | 98.95                 |
| 05001              | Arkansas, AR              | -0.048               | 39                        | 77.87                 |
| 05003              | Ashley, AR                | -0.062               | 31.61                     | 85.76                 |
| 05005              | Baxter, AR                | -0.067               | 28.91                     | 27.93                 |
| 05007              | Benton, AR                | -0.033               | 46.99                     | 27.07                 |
| 05009              | Boone, AR                 | -0.029               | 49.12                     | 43.79                 |
| 05011              | Bradley, AR               | 0.046                | 77.33                     | 98.03                 |
| 05013              | Calhoun, AR               | -0.058               | 33.78                     | 54.81                 |
| 05015              | Carroll, AR               | 0.128                | 90.35                     | 59.52                 |
| 05017              | Chicot, AR                | 0.081                | 84.34                     | 99.68                 |
| 05019              | Clark, AR                 | 0.037                | 74.4                      | 78.92                 |
| 05021              | Clay, AR                  | -0.113               | 10.98                     | 65.29                 |
| 05023              | Cleburne, AR              | -0.104               | 13.72                     | 20.83                 |
| 05025              | Cleveland, AR             | -0.061               | 31.93                     | 56.43                 |
| 05027              | Columbia, AR              | 0.156                | 92.33                     | 93.98                 |
| 05029              | Conway, AR                | -0.036               | 45.72                     | 75.89                 |
| 05031              | Craighead, AR             | -0.032               | 47.5                      | 80.41                 |
| 05033              | Crawford, AR              | -0.042               | 42.18                     | 61.05                 |
| 05035              | Crittenden, AR            | 0.089                | 85.45                     | 93.41                 |
| 05037              | Cross, AR                 | -0.028               | 49.44                     | 70.13                 |
| 05039              | Dallas, AR                | 0.03                 | 72.49                     | 87.77                 |
| 05041              | Desha, AR                 | 0.031                | 72.65                     | 95.96                 |
| 05043              | Drew, AR                  | -0.03                | 48.68                     | 80.1                  |
| 05045              | Faulkner, AR              | -0.064               | 30.66                     | 47.74                 |
| 05047              | Franklin, AR              | -0.031               | 47.98                     | 59.43                 |
| 05049              | Fulton, AR                | 0.023                | 70.49                     | 66.88                 |
| 05051              | Garland, AR               | -0.071               | 27.12                     | 82.8                  |
| 05053              | Grant, AR                 | -0.049               | 38.4                      | 35.41                 |
| 05055              | Greene, AR                | -0.044               | 40.91                     | 58.34                 |
| 05057              | Hempstead, AR             | -0.043               | 41.61                     | 94.68                 |
| 05059              | Hot Spring, AR            | 0.078                | 83.92                     | 81.88                 |
| 05061              | Howard, AR                | -0.031               | 48.11                     | 90.45                 |
| 05063              | Independence, AR          | -0.056               | 34.64                     | 75.25                 |
| 05065              | Izard, AR                 | 0.041                | 75.9                      | 56.97                 |
| 05067              | Jackson, AR               | 0.116                | 88.63                     | 76.5                  |
| 05069              | Jefferson, AR             | 0.104                | 87.23                     | 94.36                 |
| 05071              | Johnson, AR               | -0.052               | 37.41                     | 87.68                 |
| 05073              | Lafayette, AR             | -0.013               | 56.51                     | 78.98                 |
| 05075              | Lawrence, AR              | -0.074               | 26.11                     | 64.71                 |
| 05077              | Lee, AR                   | 0.281                | 97.1                      | 96.56                 |
| 05079              | Lincoln, AR               | 0.44                 | 98.85                     | 81.34                 |
| 05081              | Little River, AR          | 0.021                | 69.98                     | 63.06                 |
| 05083              | Logan, AR                 | 0.005                | 64.34                     | 80.45                 |
| 05085              | Lonoke, AR                | -0.036               | 45.75                     | 33.09                 |
| 05087              | Madison, AR               | -0.013               | 56.83                     | 65.35                 |
| 05089              | Marion, AR                | -0.028               | 49.35                     | 51.75                 |

| <b>County FIPS</b> | <b>County Description</b> | <b>DOS-SVI Index</b> | <b>DOS-SVI Percentile</b> | <b>SVI Percentile</b> |
|--------------------|---------------------------|----------------------|---------------------------|-----------------------|
| 05091              | Miller, AR                | 0.045                | 77.01                     | 91.24                 |
| 05093              | Mississippi, AR           | 0.123                | 89.53                     | 95.54                 |
| 05095              | Monroe, AR                | -0.052               | 37.09                     | 85.16                 |
| 05097              | Montgomery, AR            | -0.084               | 22.06                     | 70                    |
| 05099              | Nevada, AR                | 0.144                | 91.53                     | 88.41                 |
| 05101              | Newton, AR                | -0.121               | 8.88                      | 28.15                 |
| 05103              | Ouachita, AR              | 0.07                 | 82.23                     | 86.56                 |
| 05105              | Perry, AR                 | 0.086                | 85.04                     | 63.6                  |
| 05107              | Phillips, AR              | -0.012               | 57.18                     | 92.39                 |
| 05109              | Pike, AR                  | -0.068               | 28.4                      | 71.24                 |
| 05111              | Poinsett, AR              | 0.074                | 83.09                     | 82.68                 |
| 05113              | Polk, AR                  | 0.108                | 87.87                     | 89.49                 |
| 05115              | Pope, AR                  | -0.033               | 46.58                     | 79.36                 |
| 05117              | Prairie, AR               | 0.052                | 78.45                     | 65.48                 |
| 05119              | Pulaski, AR               | -0.139               | 5.41                      | 62.87                 |
| 05121              | Randolph, AR              | -0.045               | 40.24                     | 71.66                 |
| 05123              | St. Francis, AR           | 0.208                | 95.16                     | 96.91                 |
| 05125              | Saline, AR                | -0.065               | 29.99                     | 33.25                 |
| 05127              | Scott, AR                 | 0.082                | 84.37                     | 88.73                 |
| 05129              | Searcy, AR                | -0.127               | 7.32                      | 43.76                 |
| 05131              | Sebastian, AR             | -0.101               | 14.9                      | 83.28                 |
| 05133              | Sevier, AR                | 0.137                | 91.09                     | 76.75                 |
| 05135              | Sharp, AR                 | -0.064               | 30.59                     | 61.91                 |
| 05137              | Stone, AR                 | -0.125               | 7.74                      | 51.02                 |
| 05139              | Union, AR                 | 0.144                | 91.63                     | 80.54                 |
| 05141              | Van Buren, AR             | -0.051               | 37.89                     | 72.26                 |
| 05143              | Washington, AR            | -0.098               | 16.11                     | 67.45                 |
| 05145              | White, AR                 | -0.041               | 42.73                     | 74.46                 |
| 05147              | Woodruff, AR              | -0.071               | 27.16                     | 84.9                  |
| 05149              | Yell, AR                  | 0.04                 | 75.68                     | 87.83                 |
| 06001              | Alameda, CA               | 0.105                | 87.46                     | 47.01                 |
| 06003              | Alpine, CA                | -0.049               | 38.62                     | 72.87                 |
| 06005              | Amador, CA                | 0.154                | 92.14                     | 53.34                 |
| 06007              | Butte, CA                 | 0.035                | 74.15                     | 80.64                 |
| 06009              | Calaveras, CA             | -0.06                | 32.79                     | 23.5                  |
| 06011              | Colusa, CA                | -0.037               | 44.7                      | 74.36                 |
| 06013              | Contra Costa, CA          | 0.01                 | 66.38                     | 40.57                 |
| 06015              | Del Norte, CA             | 0.239                | 95.92                     | 97.13                 |
| 06017              | El Dorado, CA             | -0.002               | 61.29                     | 18.38                 |
| 06019              | Fresno, CA                | 0.199                | 94.72                     | 96.11                 |
| 06021              | Glenn, CA                 | -0.114               | 10.73                     | 88.95                 |
| 06023              | Humboldt, CA              | 0.101                | 86.72                     | 76.05                 |
| 06025              | Imperial, CA              | 0.257                | 96.47                     | 99.78                 |
| 06027              | Inyo, CA                  | 0.024                | 70.84                     | 57.01                 |
| 06029              | Kern, CA                  | 0.268                | 96.75                     | 96.59                 |
| 06031              | Kings, CA                 | 0.223                | 95.61                     | 97.07                 |
| 06033              | Lake, CA                  | 0.038                | 75.01                     | 91.78                 |
| 06035              | Lassen, CA                | 0.251                | 96.34                     | 59.97                 |
| 06037              | Los Angeles, CA           | 0.126                | 90.1                      | 76.82                 |
| 06039              | Madera, CA                | 0.209                | 95.26                     | 95.41                 |
| 06041              | Marin, CA                 | 0.007                | 65.08                     | 27.01                 |
| 06043              | Mariposa, CA              | 0.068                | 81.79                     | 52.93                 |
| 06045              | Mendocino, CA             | 0.121                | 89.24                     | 88.18                 |
| 06047              | Merced, CA                | 0.24                 | 95.99                     | 97.17                 |
| 06049              | Modoc, CA                 | 0.069                | 82.08                     | 75.16                 |

| <b>County FIPS</b> | <b>County Description</b> | <b>DOS-SVI Index</b> | <b>DOS-SVI Percentile</b> | <b>SVI Percentile</b> |
|--------------------|---------------------------|----------------------|---------------------------|-----------------------|
| 06051              | Mono, CA                  | -0.196               | 1.37                      | 14.08                 |
| 06053              | Monterey, CA              | 0.288                | 97.26                     | 79.9                  |
| 06055              | Napa, CA                  | 0.087                | 85.13                     | 50.51                 |
| 06057              | Nevada, CA                | -0.01                | 57.85                     | 20.45                 |
| 06059              | Orange, CA                | 0.086                | 85                        | 41.91                 |
| 06061              | Placer, CA                | -0.027               | 49.76                     | 15.19                 |
| 06063              | Plumas, CA                | -0.027               | 49.67                     | 26.53                 |
| 06065              | Riverside, CA             | 0.133                | 90.73                     | 79.39                 |
| 06067              | Sacramento, CA            | 0.01                 | 66.32                     | 73.38                 |
| 06069              | San Benito, CA            | 0.192                | 94.52                     | 52.45                 |
| 06071              | San Bernardino, CA        | 0.233                | 95.7                      | 90.1                  |
| 06073              | San Diego, CA             | 0.025                | 71.12                     | 55.96                 |
| 06075              | San Francisco, CA         | 0.101                | 86.88                     | 39.11                 |
| 06077              | San Joaquin, CA           | 0.138                | 91.15                     | 88.92                 |
| 06079              | San Luis Obispo, CA       | 0.038                | 74.94                     | 37.39                 |
| 06081              | San Mateo, CA             | 0.085                | 84.85                     | 26.5                  |
| 06083              | Santa Barbara, CA         | 0.244                | 96.15                     | 71.11                 |
| 06085              | Santa Clara, CA           | 0.079                | 83.99                     | 35.57                 |
| 06087              | Santa Cruz, CA            | 0.178                | 93.73                     | 54.3                  |
| 06089              | Shasta, CA                | 0.049                | 77.94                     | 70.22                 |
| 06091              | Sierra, CA                | -0.073               | 26.43                     | 4.52                  |
| 06093              | Siskiyou, CA              | 0.058                | 79.75                     | 72.23                 |
| 06095              | Solano, CA                | 0.09                 | 85.51                     | 59.11                 |
| 06097              | Sonoma, CA                | 0.044                | 76.95                     | 40.35                 |
| 06099              | Stanislaus, CA            | 0.113                | 88.32                     | 86.75                 |
| 06101              | Sutter, CA                | 0.048                | 77.71                     | 88.22                 |
| 06103              | Tehama, CA                | 0.147                | 91.85                     | 96.24                 |
| 06105              | Trinity, CA               | 0.047                | 77.56                     | 74.11                 |
| 06107              | Tulare, CA                | 0.17                 | 93.41                     | 94.17                 |
| 06109              | Tuolumne, CA              | 0.103                | 87.11                     | 46.88                 |
| 06111              | Ventura, CA               | 0.049                | 78.03                     | 48.28                 |
| 06113              | Yolo, CA                  | 0.055                | 79.11                     | 67.68                 |
| 06115              | Yuba, CA                  | 0.201                | 94.78                     | 94.2                  |
| 08001              | Adams, CO                 | -0.063               | 31.07                     | 58.92                 |
| 08003              | Alamosa, CO               | 0.086                | 85.07                     | 94.52                 |
| 08005              | Arapahoe, CO              | -0.185               | 1.78                      | 26.62                 |
| 08007              | Archuleta, CO             | 0.073                | 82.71                     | 25.7                  |
| 08009              | Baca, CO                  | -0.131               | 6.72                      | 60.86                 |
| 08011              | Bent, CO                  | 0.303                | 97.48                     | 89.81                 |
| 08013              | Boulder, CO               | -0.123               | 8.18                      | 17.04                 |
| 08014              | Broomfield, CO            | -0.206               | 1.08                      | 4.9                   |
| 08015              | Chaffee, CO               | -0.019               | 53.74                     | 23.89                 |
| 08017              | Cheyenne, CO              | -0.001               | 61.54                     | 25.89                 |
| 08019              | Clear Creek, CO           | -0.077               | 24.36                     | 1.97                  |
| 08021              | Conejos, CO               | 0.124                | 89.75                     | 93.25                 |
| 08023              | Costilla, CO              | -0.087               | 20.82                     | 93.79                 |
| 08025              | Crowley, CO               | 0.27                 | 96.82                     | 89.3                  |
| 08027              | Custer, CO                | 0.003                | 63.58                     | 24.33                 |
| 08029              | Delta, CO                 | 0.061                | 80.48                     | 68.66                 |
| 08031              | Denver, CO                | -0.299               | 0.22                      | 41.97                 |
| 08033              | Dolores, CO               | -0.135               | 6.08                      | 15.16                 |
| 08035              | Douglas, CO               | -0.111               | 11.56                     | 1.5                   |
| 08037              | Eagle, CO                 | -0.23                | 0.54                      | 13.69                 |
| 08039              | Elbert, CO                | -0.013               | 56.73                     | 0                     |
| 08041              | El Paso, CO               | -0.03                | 48.77                     | 39.27                 |

| <b>County FIPS</b> | <b>County Description</b>   | <b>DOS-SVI Index</b> | <b>DOS-SVI Percentile</b> | <b>SVI Percentile</b> |
|--------------------|-----------------------------|----------------------|---------------------------|-----------------------|
| 08043              | Fremont, CO                 | 0.158                | 92.45                     | 65.25                 |
| 08045              | Garfield, CO                | 0.107                | 87.81                     | 35.1                  |
| 08047              | Gilpin, CO                  | -0.046               | 39.76                     | 0.22                  |
| 08049              | Grand, CO                   | -0.103               | 14.29                     | 9.87                  |
| 08051              | Gunnison, CO                | -0.002               | 61.38                     | 13.92                 |
| 08053              | Hinsdale, CO                | -0.038               | 44.35                     | 6.24                  |
| 08055              | Huerfano, CO                | 0.023                | 70.71                     | 59.55                 |
| 08057              | Jackson, CO                 | -0.112               | 11.37                     | 11.37                 |
| 08059              | Jefferson, CO               | -0.158               | 3.5                       | 6.27                  |
| 08061              | Kiowa, CO                   | -0.065               | 29.61                     | 31.88                 |
| 08063              | Kit Carson, CO              | -0.055               | 35.21                     | 51.53                 |
| 08065              | Lake, CO                    | -0.097               | 16.43                     | 44.52                 |
| 08067              | La Plata, CO                | 0.009                | 65.81                     | 10.86                 |
| 08069              | Larimer, CO                 | -0.092               | 18.75                     | 11.94                 |
| 08071              | Las Animas, CO              | 0.063                | 80.93                     | 83.73                 |
| 08073              | Lincoln, CO                 | 0.25                 | 96.24                     | 48.57                 |
| 08075              | Logan, CO                   | 0.016                | 68.61                     | 62.8                  |
| 08077              | Mesa, CO                    | -0.001               | 61.6                      | 57.55                 |
| 08079              | Mineral, CO                 | -0.149               | 4.2                       | 2.61                  |
| 08081              | Moffat, CO                  | -0.049               | 38.59                     | 54.71                 |
| 08083              | Montezuma, CO               | 0.004                | 63.83                     | 49.46                 |
| 08085              | Montrose, CO                | 0.001                | 62.59                     | 71.53                 |
| 08087              | Morgan, CO                  | -0.072               | 26.97                     | 74.14                 |
| 08089              | Otero, CO                   | -0.092               | 18.66                     | 95.61                 |
| 08091              | Ouray, CO                   | -0.032               | 47.85                     | 2.39                  |
| 08093              | Park, CO                    | -0.009               | 58.2                      | 0.06                  |
| 08095              | Phillips, CO                | 0.049                | 77.97                     | 29.55                 |
| 08097              | Pitkin, CO                  | -0.215               | 0.8                       | 6.56                  |
| 08099              | Prowers, CO                 | 0.04                 | 75.71                     | 93.92                 |
| 08101              | Pueblo, CO                  | -0.009               | 58.39                     | 86.69                 |
| 08103              | Rio Blanco, CO              | 0.07                 | 82.3                      | 34.01                 |
| 08105              | Rio Grande, CO              | 0.169                | 93.22                     | 95.86                 |
| 08107              | Routt, CO                   | -0.141               | 5.06                      | 6.34                  |
| 08109              | Saguache, CO                | 0.178                | 93.7                      | 80.7                  |
| 08111              | San Juan, CO                | -0.109               | 11.97                     | 12.83                 |
| 08113              | San Miguel, CO              | -0.206               | 1.11                      | 3.31                  |
| 08115              | Sedgwick, CO                | 0.029                | 72.14                     | 69.36                 |
| 08117              | Summit, CO                  | -0.213               | 0.99                      | 7.07                  |
| 08119              | Teller, CO                  | -0.019               | 53.45                     | 7.29                  |
| 08121              | Washington, CO              | 0.062                | 80.64                     | 28.22                 |
| 08123              | Weld, CO                    | -0.034               | 46.45                     | 39.94                 |
| 08125              | Yuma, CO                    | 0.004                | 63.9                      | 56.37                 |
| 09001              | Fairfield, CT               | -0.056               | 34.96                     | 44.97                 |
| 09003              | Hartford, CT                | -0.081               | 23.02                     | 51.5                  |
| 09005              | Litchfield, CT              | -0.058               | 33.68                     | 8.18                  |
| 09007              | Middlesex, CT               | -0.07                | 27.67                     | 11.82                 |
| 09009              | New Haven, CT               | -0.031               | 48.3                      | 52.23                 |
| 09011              | New London, CT              | -0.061               | 32.16                     | 35.61                 |
| 09013              | Tolland, CT                 | 0.012                | 67.37                     | 6.94                  |
| 09015              | Windham, CT                 | -0.021               | 52.85                     | 42.32                 |
| 10001              | Kent, DE                    | -0.038               | 44.28                     | 72.68                 |
| 10003              | New Castle, DE              | -0.102               | 14.52                     | 37.61                 |
| 10005              | Sussex, DE                  | -0.068               | 28.56                     | 40.19                 |
| 11001              | District of Columbia,<br>DC | 0.089                | 85.42                     | 59.65                 |

| <b>County FIPS</b> | <b>County Description</b> | <b>DOS-SVI Index</b> | <b>DOS-SVI Percentile</b> | <b>SVI Percentile</b> |
|--------------------|---------------------------|----------------------|---------------------------|-----------------------|
| 12001              | Alachua, FL               | -0.113               | 10.79                     | 47.29                 |
| 12003              | Baker, FL                 | 0.108                | 87.93                     | 68.03                 |
| 12005              | Bay, FL                   | -0.193               | 1.56                      | 60.76                 |
| 12007              | Bradford, FL              | 0.095                | 86.15                     | 92.64                 |
| 12009              | Brevard, FL               | -0.135               | 6.05                      | 37.13                 |
| 12011              | Broward, FL               | -0.269               | 0.35                      | 58.44                 |
| 12013              | Calhoun, FL               | 0.182                | 93.82                     | 84.01                 |
| 12015              | Charlotte, FL             | -0.109               | 12.07                     | 48.89                 |
| 12017              | Citrus, FL                | -0.022               | 52.53                     | 60.22                 |
| 12019              | Clay, FL                  | -0.033               | 46.96                     | 38.03                 |
| 12021              | Collier, FL               | -0.26                | 0.38                      | 46.18                 |
| 12023              | Columbia, FL              | 0.155                | 92.23                     | 85.96                 |
| 12027              | DeSoto, FL                | 0.083                | 84.5                      | 96.18                 |
| 12029              | Dixie, FL                 | 0.22                 | 95.51                     | 89.94                 |
| 12031              | Duval, FL                 | -0.114               | 10.57                     | 69.2                  |
| 12033              | Escambia, FL              | -0.057               | 34.19                     | 48.63                 |
| 12035              | Flagler, FL               | -0.15                | 4.08                      | 27.99                 |
| 12037              | Franklin, FL              | 0.124                | 89.78                     | 80.83                 |
| 12039              | Gadsden, FL               | 0.159                | 92.49                     | 99.01                 |
| 12041              | Gilchrist, FL             | 0.02                 | 69.5                      | 75.67                 |
| 12043              | Glades, FL                | 0.085                | 84.81                     | 90.48                 |
| 12045              | Gulf, FL                  | 0.067                | 81.63                     | 59.2                  |
| 12047              | Hamilton, FL              | 0.377                | 98.53                     | 99.08                 |
| 12049              | Hardee, FL                | 0.273                | 96.94                     | 98.31                 |
| 12051              | Hendry, FL                | 0.129                | 90.42                     | 99.39                 |
| 12053              | Hernando, FL              | -0.076               | 24.74                     | 54.9                  |
| 12055              | Highlands, FL             | 0.06                 | 80.1                      | 87.29                 |
| 12057              | Hillsborough, FL          | -0.125               | 7.86                      | 67.01                 |
| 12059              | Holmes, FL                | 0.093                | 85.8                      | 93.47                 |
| 12061              | Indian River, FL          | -0.165               | 2.96                      | 39.62                 |
| 12063              | Jackson, FL               | 0.263                | 96.56                     | 95.83                 |
| 12065              | Jefferson, FL             | 0.122                | 89.37                     | 57.48                 |
| 12067              | Lafayette, FL             | 0.422                | 98.76                     | 98.06                 |
| 12069              | Lake, FL                  | -0.032               | 47.47                     | 60.29                 |
| 12071              | Lee, FL                   | -0.193               | 1.53                      | 55.25                 |
| 12073              | Leon, FL                  | -0.086               | 20.89                     | 49.43                 |
| 12075              | Levy, FL                  | 0.004                | 63.8                      | 77.93                 |
| 12077              | Liberty, FL               | 0.178                | 93.76                     | 83.34                 |
| 12079              | Madison, FL               | 0.233                | 95.73                     | 96.08                 |
| 12081              | Manatee, FL               | -0.122               | 8.4                       | 51.97                 |
| 12083              | Marion, FL                | 0.004                | 63.99                     | 75.35                 |
| 12085              | Martin, FL                | -0.139               | 5.57                      | 39.9                  |
| 12086              | Miami-Dade, FL            | -0.366               | 0.06                      | 81.75                 |
| 12087              | Monroe, FL                | -0.031               | 47.91                     | 45.57                 |
| 12089              | Nassau, FL                | -0.101               | 14.8                      | 24.59                 |
| 12091              | Okaloosa, FL              | -0.14                | 5.32                      | 38.6                  |
| 12093              | Okeechobee, FL            | 0.088                | 85.32                     | 94.65                 |
| 12095              | Orange, FL                | -0.189               | 1.69                      | 66.91                 |
| 12097              | Osceola, FL               | -0.18                | 1.94                      | 81.78                 |
| 12099              | Palm Beach, FL            | -0.218               | 0.7                       | 55.92                 |
| 12101              | Pasco, FL                 | -0.055               | 35.34                     | 63.44                 |
| 12103              | Pinellas, FL              | -0.213               | 0.92                      | 51.69                 |
| 12105              | Polk, FL                  | 0.017                | 68.86                     | 90.35                 |
| 12107              | Putnam, FL                | 0.054                | 78.96                     | 95.25                 |
| 12109              | St. Johns, FL             | -0.126               | 7.45                      | 7.61                  |

| County FIPS | County Description | DOS-SVI Index | DOS-SVI Percentile | SVI Percentile |
|-------------|--------------------|---------------|--------------------|----------------|
| 12111       | St. Lucie, FL      | -0.141        | 5.13               | 71.85          |
| 12113       | Santa Rosa, FL     | -0.022        | 52.56              | 30.96          |
| 12115       | Sarasota, FL       | -0.197        | 1.34               | 25.38          |
| 12117       | Seminole, FL       | -0.142        | 4.93               | 18.44          |
| 12119       | Sumter, FL         | -0.016        | 55.14              | 23.6           |
| 12121       | Suwannee, FL       | 0.071         | 82.39              | 94.24          |
| 12123       | Taylor, FL         | 0.209         | 95.19              | 89.84          |
| 12125       | Union, FL          | 0.405         | 98.6               | 83.82          |
| 12127       | Volusia, FL        | -0.18         | 2.01               | 53.47          |
| 12129       | Wakulla, FL        | 0.102         | 86.92              | 40.32          |
| 12131       | Walton, FL         | -0.125        | 7.9                | 58.22          |
| 12133       | Washington, FL     | 0.119         | 88.98              | 89.39          |
| 13001       | Appling, GA        | 0.013         | 67.65              | 96.69          |
| 13003       | Atkinson, GA       | -0.078        | 24.1               | 96.15          |
| 13005       | Bacon, GA          | 0.003         | 63.55              | 93.89          |
| 13007       | Baker, GA          | 0.039         | 75.2               | 74.24          |
| 13009       | Baldwin, GA        | 0.062         | 80.74              | 86.66          |
| 13011       | Banks, GA          | -0.055        | 35.47              | 55.86          |
| 13013       | Barrow, GA         | -0.093        | 18.37              | 42.04          |
| 13015       | Bartow, GA         | -0.064        | 30.44              | 59.14          |
| 13017       | Ben Hill, GA       | -0.033        | 47.02              | 87.26          |
| 13019       | Berrien, GA        | 0.002         | 63.04              | 85             |
| 13021       | Bibb, GA           | 0.004         | 64.25              | 91.75          |
| 13023       | Bleckley, GA       | 0.074         | 82.9               | 73.95          |
| 13025       | Brantley, GA       | -0.023        | 52.02              | 62.29          |
| 13027       | Brooks, GA         | 0.058         | 79.78              | 83.98          |
| 13029       | Bryan, GA          | -0.03         | 48.39              | 33.89          |
| 13031       | Bulloch, GA        | 0.043         | 76.28              | 81.21          |
| 13033       | Burke, GA          | 0.068         | 81.89              | 84.55          |
| 13035       | Butts, GA          | 0.099         | 86.5               | 76.53          |
| 13037       | Calhoun, GA        | 0.362         | 98.41              | 97.74          |
| 13039       | Camden, GA         | 0.053         | 78.8               | 51.59          |
| 13043       | Candler, GA        | 0.126         | 90.13              | 98.28          |
| 13045       | Carroll, GA        | -0.048        | 39.03              | 78.25          |
| 13047       | Catoosa, GA        | -0.09         | 19.29              | 13.18          |
| 13049       | Charlton, GA       | 0.017         | 69.12              | 87.52          |
| 13051       | Chatham, GA        | -0.032        | 47.82              | 69.49          |
| 13053       | Chattahoochee, GA  | 0.523         | 99.17              | 63.79          |
| 13055       | Chattooga, GA      | 0.234         | 95.77              | 92.52          |
| 13057       | Cherokee, GA       | -0.101        | 14.93              | 11.85          |
| 13059       | Clarke, GA         | -0.092        | 18.72              | 76.75          |
| 13061       | Clay, GA           | 0.17          | 93.31              | 93.09          |
| 13063       | Clayton, GA        | -0.045        | 40.18              | 91.02          |
| 13065       | Clinch, GA         | 0.094         | 85.96              | 97.77          |
| 13067       | Cobb, GA           | -0.17         | 2.52               | 26.69          |
| 13069       | Coffee, GA         | 0.035         | 74.12              | 95.06          |
| 13071       | Colquitt, GA       | -0.026        | 50.27              | 98.12          |
| 13073       | Columbia, GA       | -0.097        | 16.46              | 13.34          |
| 13075       | Cook, GA           | -0.02         | 53.23              | 85.1           |
| 13077       | Coweta, GA         | -0.098        | 16.36              | 24.27          |
| 13079       | Crawford, GA       | 0.094         | 85.99              | 68.15          |
| 13081       | Crisp, GA          | 0.124         | 89.88              | 98.57          |
| 13083       | Dade, GA           | 0.061         | 80.42              | 51.56          |
| 13085       | Dawson, GA         | -0.067        | 28.72              | 10.38          |
| 13087       | Decatur, GA        | 0.259         | 96.5               | 94.55          |

| <b>County FIPS</b> | <b>County Description</b> | <b>DOS-SVI Index</b> | <b>DOS-SVI Percentile</b> | <b>SVI Percentile</b> |
|--------------------|---------------------------|----------------------|---------------------------|-----------------------|
| 13089              | DeKalb, GA                | -0.166               | 2.9                       | 66.11                 |
| 13091              | Dodge, GA                 | 0.097                | 86.37                     | 92.23                 |
| 13093              | Dooly, GA                 | 0.113                | 88.35                     | 94.84                 |
| 13095              | Dougherty, GA             | 0.159                | 92.52                     | 95.13                 |
| 13097              | Douglas, GA               | -0.092               | 18.91                     | 54.04                 |
| 13099              | Early, GA                 | 0.212                | 95.38                     | 92.01                 |
| 13101              | Echols, GA                | -0.107               | 12.93                     | 66.15                 |
| 13103              | Effingham, GA             | -0.042               | 42.31                     | 23.63                 |
| 13105              | Elbert, GA                | -0.052               | 37.19                     | 83.38                 |
| 13107              | Emanuel, GA               | 0.027                | 71.7                      | 97.68                 |
| 13109              | Evans, GA                 | 0.01                 | 66.48                     | 98.47                 |
| 13111              | Fannin, GA                | -0.098               | 16.17                     | 30.03                 |
| 13113              | Fayette, GA               | -0.06                | 32.31                     | 6.08                  |
| 13115              | Floyd, GA                 | -0.009               | 58.33                     | 88.54                 |
| 13117              | Forsyth, GA               | -0.078               | 23.75                     | 3.73                  |
| 13119              | Franklin, GA              | -0.068               | 28.59                     | 84.62                 |
| 13121              | Fulton, GA                | -0.189               | 1.66                      | 52.68                 |
| 13123              | Gilmer, GA                | -0.108               | 12.64                     | 55.99                 |
| 13125              | Glascock, GA              | 0.16                 | 92.61                     | 68.6                  |
| 13127              | Glynn, GA                 | -0.093               | 18.18                     | 71.59                 |
| 13129              | Gordon, GA                | -0.12                | 9.04                      | 88.06                 |
| 13131              | Grady, GA                 | -0.067               | 28.62                     | 92.58                 |
| 13133              | Greene, GA                | -0.102               | 14.71                     | 53.79                 |
| 13135              | Gwinnett, GA              | -0.14                | 5.19                      | 43.47                 |
| 13137              | Habersham, GA             | -0.039               | 44                        | 71.46                 |
| 13139              | Hall, GA                  | -0.038               | 44.25                     | 66.18                 |
| 13141              | Hancock, GA               | 0.239                | 95.89                     | 79.84                 |
| 13143              | Haralson, GA              | -0.098               | 16.2                      | 54.27                 |
| 13145              | Harris, GA                | -0.018               | 54.06                     | 13.41                 |
| 13147              | Hart, GA                  | -0.104               | 13.75                     | 71.94                 |
| 13149              | Heard, GA                 | 0.033                | 73.7                      | 72.32                 |
| 13151              | Henry, GA                 | -0.125               | 7.64                      | 31.37                 |
| 13153              | Houston, GA               | 0.035                | 74.02                     | 56.69                 |
| 13155              | Irwin, GA                 | -0.059               | 33.3                      | 84.08                 |
| 13157              | Jackson, GA               | -0.064               | 30.25                     | 35.16                 |
| 13159              | Jasper, GA                | 0.046                | 77.43                     | 69.27                 |
| 13161              | Jeff Davis, GA            | 0.105                | 87.52                     | 93.73                 |
| 13163              | Jefferson, GA             | 0.127                | 90.19                     | 94.39                 |
| 13165              | Jenkins, GA               | -0.011               | 57.4                      | 82.83                 |
| 13167              | Johnson, GA               | 0.2                  | 94.75                     | 90.61                 |
| 13169              | Jones, GA                 | 0                    | 62.18                     | 37.93                 |
| 13171              | Lamar, GA                 | 0.078                | 83.89                     | 49.17                 |
| 13173              | Lanier, GA                | -0.047               | 39.57                     | 86.97                 |
| 13175              | Laurens, GA               | 0.034                | 73.89                     | 80.13                 |
| 13177              | Lee, GA                   | 0.041                | 75.93                     | 35.19                 |
| 13179              | Liberty, GA               | 0.116                | 88.73                     | 88.82                 |
| 13181              | Lincoln, GA               | -0.05                | 38.14                     | 55.64                 |
| 13183              | Long, GA                  | 0.069                | 82.01                     | 82.71                 |
| 13185              | Lowndes, GA               | 0.023                | 70.81                     | 86.62                 |
| 13187              | Lumpkin, GA               | -0.106               | 13.09                     | 43.38                 |
| 13189              | McDuffie, GA              | 0.022                | 70.42                     | 93.76                 |
| 13191              | McIntosh, GA              | -0.077               | 24.2                      | 58.63                 |
| 13193              | Macon, GA                 | 0.219                | 95.48                     | 93.12                 |
| 13195              | Madison, GA               | 0.014                | 67.78                     | 64.17                 |
| 13197              | Marion, GA                | -0.018               | 54.12                     | 85.19                 |

| <b>County FIPS</b> | <b>County Description</b> | <b>DOS-SVI Index</b> | <b>DOS-SVI Percentile</b> | <b>SVI Percentile</b> |
|--------------------|---------------------------|----------------------|---------------------------|-----------------------|
| 13199              | Meriwether, GA            | -0.058               | 33.75                     | 87.01                 |
| 13201              | Miller, GA                | 0.272                | 96.88                     | 77.99                 |
| 13205              | Mitchell, GA              | 0.191                | 94.46                     | 98.79                 |
| 13207              | Monroe, GA                | 0.04                 | 75.58                     | 45.96                 |
| 13209              | Montgomery, GA            | 0.083                | 84.43                     | 84.65                 |
| 13211              | Morgan, GA                | -0.064               | 30.4                      | 24.46                 |
| 13213              | Murray, GA                | -0.012               | 57.31                     | 71.34                 |
| 13215              | Muscogee, GA              | -0.04                | 43.2                      | 90.03                 |
| 13217              | Newton, GA                | -0.025               | 50.78                     | 70.7                  |
| 13219              | Oconee, GA                | -0.01                | 58.1                      | 3.54                  |
| 13221              | Oglethorpe, GA            | -0.093               | 18.34                     | 52.17                 |
| 13223              | Paulding, GA              | -0.048               | 38.84                     | 13.76                 |
| 13225              | Peach, GA                 | 0.068                | 81.76                     | 94.04                 |
| 13227              | Pickens, GA               | 0.001                | 62.75                     | 27.96                 |
| 13229              | Pierce, GA                | -0.112               | 11.24                     | 65.7                  |
| 13231              | Pike, GA                  | -0.008               | 58.96                     | 15.1                  |
| 13233              | Polk, GA                  | -0.015               | 55.72                     | 80.48                 |
| 13235              | Pulaski, GA               | -0.031               | 48.33                     | 84.59                 |
| 13237              | Putnam, GA                | -0.108               | 12.51                     | 42.8                  |
| 13239              | Quitman, GA               | 0.088                | 85.29                     | 94.33                 |
| 13241              | Rabun, GA                 | -0.064               | 30.28                     | 53.41                 |
| 13243              | Randolph, GA              | 0.186                | 94.11                     | 97.39                 |
| 13245              | Richmond, GA              | 0.014                | 67.97                     | 93.28                 |
| 13247              | Rockdale, GA              | -0.046               | 39.64                     | 55.29                 |
| 13249              | Schley, GA                | 0.104                | 87.27                     | 82.48                 |
| 13251              | Screven, GA               | 0.134                | 90.86                     | 85.25                 |
| 13253              | Seminole, GA              | 0.168                | 93.19                     | 83.44                 |
| 13255              | Spalding, GA              | 0.008                | 65.49                     | 86.91                 |
| 13257              | Stephens, GA              | 0.057                | 79.5                      | 79.68                 |
| 13259              | Stewart, GA               | 0.207                | 95.13                     | 92.45                 |
| 13261              | Sumter, GA                | 0.114                | 88.47                     | 97.64                 |
| 13263              | Talbot, GA                | 0.066                | 81.41                     | 85.89                 |
| 13265              | Taliaferro, GA            | 0.023                | 70.61                     | 90.89                 |
| 13267              | Tattall, GA               | 0.299                | 97.42                     | 90.8                  |
| 13269              | Taylor, GA                | 0.115                | 88.6                      | 91.97                 |
| 13271              | Telfair, GA               | -0.012               | 57.21                     | 83.69                 |
| 13273              | Terrell, GA               | 0.138                | 91.12                     | 95.7                  |
| 13275              | Thomas, GA                | 0.061                | 80.33                     | 91.08                 |
| 13277              | Tift, GA                  | 0.007                | 65.17                     | 88.09                 |
| 13279              | Toombs, GA                | 0.138                | 91.21                     | 97.61                 |
| 13281              | Towns, GA                 | -0.062               | 31.74                     | 32.58                 |
| 13283              | Treutlen, GA              | 0.053                | 78.7                      | 94.71                 |
| 13285              | Troup, GA                 | -0.049               | 38.46                     | 90.13                 |
| 13287              | Turner, GA                | 0.06                 | 80.17                     | 98.09                 |
| 13289              | Twiggs, GA                | -0.131               | 6.62                      | 75.8                  |
| 13291              | Union, GA                 | -0.1                 | 15.09                     | 31.15                 |
| 13293              | Upson, GA                 | 0.033                | 73.54                     | 85.32                 |
| 13295              | Walker, GA                | -0.052               | 37.12                     | 64.08                 |
| 13297              | Walton, GA                | -0.039               | 43.97                     | 29.3                  |
| 13299              | Ware, GA                  | -0.01                | 57.94                     | 84.49                 |
| 13301              | Warren, GA                | 0.026                | 71.35                     | 89.46                 |
| 13303              | Washington, GA            | 0.113                | 88.28                     | 94.62                 |
| 13305              | Wayne, GA                 | 0.154                | 92.2                      | 91.66                 |
| 13307              | Webster, GA               | -0.17                | 2.48                      | 78.76                 |
| 13309              | Wheeler, GA               | 0.367                | 98.5                      | 81.24                 |



| <b>County FIPS</b> | <b>County Description</b> | <b>DOS-SVI Index</b> | <b>DOS-SVI Percentile</b> | <b>SVI Percentile</b> |
|--------------------|---------------------------|----------------------|---------------------------|-----------------------|
| 13311              | White, GA                 | -0.121               | 8.82                      | 23.57                 |
| 13313              | Whitfield, GA             | 0.017                | 68.96                     | 87.93                 |
| 13315              | Wilcox, GA                | 0.235                | 95.8                      | 81.69                 |
| 13317              | Wilkes, GA                | -0.094               | 17.99                     | 75.61                 |
| 13319              | Wilkinson, GA             | 0.071                | 82.46                     | 78.73                 |
| 13321              | Worth, GA                 | -0.113               | 11.18                     | 73.57                 |
| 15001              | Hawaii, HI                | 0.186                | 94.17                     | 57.71                 |
| 15003              | Honolulu, HI              | 0.184                | 94.02                     | 47.2                  |
| 15005              | Kalawao, HI               | 0.093                | 85.83                     | 31.62                 |
| 15007              | Kauai, HI                 | 0.217                | 95.45                     | 30.99                 |
| 15009              | Maui, HI                  | 0.282                | 97.17                     | 38.79                 |
| 16001              | Ada, ID                   | -0.084               | 21.81                     | 13.73                 |
| 16003              | Adams, ID                 | 0.042                | 76.03                     | 29.36                 |
| 16005              | Bannock, ID               | 0.005                | 64.37                     | 57.9                  |
| 16007              | Bear Lake, ID             | -0.033               | 47.05                     | 21.43                 |
| 16009              | Benewah, ID               | 0.209                | 95.22                     | 73.34                 |
| 16011              | Bingham, ID               | 0.021                | 70.07                     | 50.7                  |
| 16013              | Blaine, ID                | -0.227               | 0.6                       | 32.39                 |
| 16015              | Boise, ID                 | -0.002               | 61.06                     | 6.72                  |
| 16017              | Bonner, ID                | -0.074               | 25.95                     | 24.01                 |
| 16019              | Bonneville, ID            | -0.002               | 61.13                     | 36.34                 |
| 16021              | Boundary, ID              | -0.002               | 61                        | 30.83                 |
| 16023              | Butte, ID                 | -0.017               | 54.95                     | 24.62                 |
| 16025              | Camas, ID                 | -0.112               | 11.3                      | 13.38                 |
| 16027              | Canyon, ID                | 0.051                | 78.29                     | 73.66                 |
| 16029              | Caribou, ID               | 0.042                | 76.25                     | 19.17                 |
| 16031              | Cassia, ID                | -0.071               | 27.06                     | 67.32                 |
| 16033              | Clark, ID                 | 0.305                | 97.61                     | 89.11                 |
| 16035              | Clearwater, ID            | 0.045                | 77.05                     | 44.01                 |
| 16037              | Custer, ID                | -0.142               | 4.9                       | 43.69                 |
| 16039              | Elmore, ID                | 0.002                | 63.23                     | 58.82                 |
| 16041              | Franklin, ID              | 0.036                | 74.31                     | 14.14                 |
| 16043              | Fremont, ID               | 0.124                | 89.72                     | 51.37                 |
| 16045              | Gem, ID                   | -0.105               | 13.56                     | 66.27                 |
| 16047              | Gooding, ID               | 0.009                | 66                        | 70.76                 |
| 16049              | Idaho, ID                 | 0.091                | 85.58                     | 53.92                 |
| 16051              | Jefferson, ID             | 0.092                | 85.7                      | 25.25                 |
| 16053              | Jerome, ID                | -0.014               | 55.97                     | 67.36                 |
| 16055              | Kootenai, ID              | -0.062               | 31.42                     | 23.28                 |
| 16057              | Latah, ID                 | -0.055               | 35.15                     | 24.84                 |
| 16059              | Lemhi, ID                 | 0.074                | 83.03                     | 29.97                 |
| 16061              | Lewis, ID                 | 0.009                | 66.09                     | 56.78                 |
| 16063              | Lincoln, ID               | 0.024                | 70.97                     | 55.76                 |
| 16065              | Madison, ID               | 0.061                | 80.45                     | 40.29                 |
| 16067              | Minidoka, ID              | -0.155               | 3.66                      | 67.83                 |
| 16069              | Nez Perce, ID             | -0.016               | 55.17                     | 50.67                 |
| 16071              | Oneida, ID                | 0.01                 | 66.51                     | 34.24                 |
| 16073              | Owyhee, ID                | 0.033                | 73.45                     | 82.45                 |
| 16075              | Payette, ID               | 0.105                | 87.42                     | 60.1                  |
| 16077              | Power, ID                 | -0.006               | 59.66                     | 51.62                 |
| 16079              | Shoshone, ID              | -0.032               | 47.76                     | 75.7                  |
| 16081              | Teton, ID                 | 0.011                | 66.76                     | 13.44                 |
| 16083              | Twin Falls, ID            | -0.044               | 40.69                     | 49.55                 |
| 16085              | Valley, ID                | -0.084               | 22                        | 8.82                  |
| 16087              | Washington, ID            | -0.069               | 28.08                     | 85.06                 |

| <b>County FIPS</b> | <b>County Description</b> | <b>DOS-SVI Index</b> | <b>DOS-SVI Percentile</b> | <b>SVI Percentile</b> |
|--------------------|---------------------------|----------------------|---------------------------|-----------------------|
| 17001              | Adams, IL                 | -0.033               | 46.74                     | 24.9                  |
| 17003              | Alexander, IL             | -0.146               | 4.68                      | 95.73                 |
| 17005              | Bond, IL                  | 0.153                | 92.07                     | 37.32                 |
| 17007              | Boone, IL                 | 0.003                | 63.74                     | 46.97                 |
| 17009              | Brown, IL                 | 0.298                | 97.39                     | 47.45                 |
| 17011              | Bureau, IL                | -0.072               | 26.68                     | 28.63                 |
| 17013              | Calhoun, IL               | -0.002               | 61.19                     | 19.01                 |
| 17015              | Carroll, IL               | -0.066               | 29.13                     | 16.82                 |
| 17017              | Cass, IL                  | -0.057               | 34.23                     | 69.71                 |
| 17019              | Champaign, IL             | 0.099                | 86.56                     | 49.9                  |
| 17021              | Christian, IL             | -0.06                | 32.86                     | 24.08                 |
| 17023              | Clark, IL                 | -0.045               | 40.5                      | 20.73                 |
| 17025              | Clay, IL                  | 0.031                | 72.94                     | 61.15                 |
| 17027              | Clinton, IL               | 0.006                | 64.79                     | 17.87                 |
| 17029              | Coles, IL                 | -0.075               | 25.25                     | 49.78                 |
| 17031              | Cook, IL                  | -0.02                | 53.36                     | 67.55                 |
| 17033              | Crawford, IL              | 0.054                | 79.05                     | 38.38                 |
| 17035              | Cumberland, IL            | -0.058               | 33.65                     | 16.27                 |
| 17037              | DeKalb, IL                | -0.055               | 35.02                     | 48.66                 |
| 17039              | De Witt, IL               | -0.04                | 43.52                     | 12.9                  |
| 17041              | Douglas, IL               | 0.06                 | 80.13                     | 44.39                 |
| 17043              | DuPage, IL                | -0.134               | 6.24                      | 16.11                 |
| 17045              | Edgar, IL                 | -0.055               | 35.08                     | 34.33                 |
| 17047              | Edwards, IL               | 0                    | 62.24                     | 24.43                 |
| 17049              | Effingham, IL             | -0.017               | 54.66                     | 19.9                  |
| 17051              | Fayette, IL               | -0.002               | 61.22                     | 59.49                 |
| 17053              | Ford, IL                  | -0.09                | 19.39                     | 30.51                 |
| 17055              | Franklin, IL              | -0.021               | 52.98                     | 60.92                 |
| 17057              | Fulton, IL                | -0.005               | 60.33                     | 57.61                 |
| 17059              | Gallatin, IL              | -0.121               | 8.72                      | 45.38                 |
| 17061              | Greene, IL                | -0.067               | 28.65                     | 19.52                 |
| 17063              | Grundy, IL                | -0.048               | 38.75                     | 8.44                  |
| 17065              | Hamilton, IL              | -0.104               | 14.04                     | 15.29                 |
| 17067              | Hancock, IL               | -0.007               | 59.15                     | 12.32                 |
| 17069              | Hardin, IL                | 0.075                | 83.32                     | 50.19                 |
| 17071              | Henderson, IL             | -0.06                | 32.47                     | 6.69                  |
| 17073              | Henry, IL                 | -0.093               | 18.27                     | 20.1                  |
| 17075              | Iroquois, IL              | -0.048               | 39.13                     | 34.04                 |
| 17077              | Jackson, IL               | 0.003                | 63.52                     | 70.45                 |
| 17079              | Jasper, IL                | -0.061               | 32.06                     | 24.17                 |
| 17081              | Jefferson, IL             | -0.008               | 58.9                      | 81.08                 |
| 17083              | Jersey, IL                | -0.023               | 51.77                     | 10.41                 |
| 17085              | Jo Daviess, IL            | -0.053               | 36.36                     | 5.25                  |
| 17087              | Johnson, IL               | 0.132                | 90.7                      | 46.24                 |
| 17089              | Kane, IL                  | -0.042               | 42.12                     | 41.69                 |
| 17091              | Kankakee, IL              | 0.009                | 65.84                     | 66.56                 |
| 17093              | Kendall, IL               | -0.052               | 36.99                     | 13.98                 |
| 17095              | Knox, IL                  | 0.017                | 69.09                     | 64.62                 |
| 17097              | Lake, IL                  | -0.063               | 31.23                     | 35.13                 |
| 17099              | LaSalle, IL               | -0.037               | 45.08                     | 43.03                 |
| 17101              | Lawrence, IL              | 0.137                | 91.05                     | 77.83                 |
| 17103              | Lee, IL                   | 0.021                | 70.04                     | 30.1                  |
| 17105              | Livingston, IL            | 0.006                | 64.76                     | 48.41                 |
| 17107              | Logan, IL                 | 0.068                | 81.69                     | 22.71                 |
| 17109              | McDonough, IL             | 0.053                | 78.61                     | 51.66                 |

| County FIPS | County Description | DOS-SVI Index | DOS-SVI Percentile | SVI Percentile |
|-------------|--------------------|---------------|--------------------|----------------|
| 17111       | McHenry, IL        | -0.06         | 32.6               | 7.01           |
| 17113       | McLean, IL         | -0.11         | 11.75              | 19.04          |
| 17115       | Macon, IL          | -0.021        | 52.91              | 59.71          |
| 17117       | Macoupin, IL       | -0.026        | 50.14              | 19.87          |
| 17119       | Madison, IL        | -0.014        | 56.29              | 29.65          |
| 17121       | Marion, IL         | 0.029         | 72.17              | 73.85          |
| 17123       | Marshall, IL       | -0.035        | 46.04              | 5.45           |
| 17125       | Mason, IL          | -0.04         | 43.33              | 29.46          |
| 17127       | Massac, IL         | 0.011         | 66.64              | 75.13          |
| 17129       | Menard, IL         | -0.035        | 45.94              | 4.84           |
| 17131       | Mercer, IL         | -0.06         | 32.76              | 11.34          |
| 17133       | Monroe, IL         | -0.053        | 36.26              | 0.16           |
| 17135       | Montgomery, IL     | 0.071         | 82.36              | 39.14          |
| 17137       | Morgan, IL         | 0.004         | 64.18              | 50.45          |
| 17139       | Moultrie, IL       | 0.126         | 90.03              | 29.49          |
| 17141       | Ogle, IL           | -0.021        | 52.75              | 29.17          |
| 17143       | Peoria, IL         | -0.063        | 31.11              | 61.31          |
| 17145       | Perry, IL          | 0.026         | 71.6               | 64.87          |
| 17147       | Piatt, IL          | -0.1          | 15.22              | 0.32           |
| 17149       | Pike, IL           | -0.016        | 55.24              | 34.94          |
| 17151       | Pope, IL           | 0.09          | 85.48              | 45.45          |
| 17153       | Pulaski, IL        | 0.012         | 67.08              | 69.43          |
| 17155       | Putnam, IL         | -0.078        | 23.85              | 2.77           |
| 17157       | Randolph, IL       | 0.032         | 73.16              | 45.67          |
| 17159       | Richland, IL       | -0.105        | 13.4               | 41.05          |
| 17161       | Rock Island, IL    | -0.063        | 31.33              | 71.37          |
| 17163       | St. Clair, IL      | -0.011        | 57.56              | 52.29          |
| 17165       | Saline, IL         | -0.004        | 60.55              | 86.37          |
| 17167       | Sangamon, IL       | -0.026        | 50.33              | 43.57          |
| 17169       | Schuyler, IL       | -0.053        | 36.13              | 57.07          |
| 17171       | Scott, IL          | 0.048         | 77.78              | 13.54          |
| 17173       | Shelby, IL         | -0.015        | 55.59              | 8.5            |
| 17175       | Stark, IL          | -0.098        | 15.86              | 6.34           |
| 17177       | Stephenson, IL     | -0.054        | 35.85              | 50             |
| 17179       | Tazewell, IL       | -0.045        | 40.34              | 10.7           |
| 17181       | Union, IL          | 0.031         | 72.97              | 68.44          |
| 17183       | Vermilion, IL      | 0.012         | 67.05              | 81.31          |
| 17185       | Wabash, IL         | -0.081        | 22.86              | 32.07          |
| 17187       | Warren, IL         | 0.131         | 90.54              | 60.73          |
| 17189       | Washington, IL     | 0.011         | 66.79              | 6.53           |
| 17191       | Wayne, IL          | -0.025        | 50.65              | 43.31          |
| 17193       | White, IL          | 0.027         | 71.76              | 53.82          |
| 17195       | Whiteside, IL      | -0.07         | 27.79              | 32.83          |
| 17197       | Will, IL           | -0.05         | 38.17              | 20.22          |
| 17199       | Williamson, IL     | -0.034        | 46.48              | 48.06          |
| 17201       | Winnebago, IL      | -0.014        | 55.91              | 72.04          |
| 17203       | Woodford, IL       | 0             | 61.92              | 1.88           |
| 18001       | Adams, IN          | 0.164         | 92.9               | 59.04          |
| 18003       | Allen, IN          | -0.114        | 10.47              | 52.36          |
| 18005       | Bartholomew, IN    | -0.032        | 47.69              | 36.31          |
| 18007       | Benton, IN         | -0.094        | 17.64              | 33.47          |
| 18009       | Blackford, IN      | -0.011        | 57.47              | 37.1           |
| 18011       | Boone, IN          | -0.093        | 18.4               | 4.49           |
| 18013       | Brown, IN          | -0.052        | 36.87              | 6.02           |
| 18015       | Carroll, IN        | -0.049        | 38.43              | 11.75          |

| <b>County FIPS</b> | <b>County Description</b> | <b>DOS-SVI Index</b> | <b>DOS-SVI Percentile</b> | <b>SVI Percentile</b> |
|--------------------|---------------------------|----------------------|---------------------------|-----------------------|
| 18017              | Cass, IN                  | -0.072               | 26.46                     | 71.97                 |
| 18019              | Clark, IN                 | -0.119               | 9.11                      | 25.48                 |
| 18021              | Clay, IN                  | -0.043               | 41.36                     | 33.38                 |
| 18023              | Clinton, IN               | -0.072               | 26.49                     | 57.1                  |
| 18025              | Crawford, IN              | -0.066               | 29.07                     | 38.89                 |
| 18027              | Daviess, IN               | 0.105                | 87.55                     | 68.82                 |
| 18029              | Dearborn, IN              | -0.077               | 24.58                     | 7.99                  |
| 18031              | Decatur, IN               | -0.089               | 19.87                     | 21.02                 |
| 18033              | DeKalb, IN                | -0.1                 | 15.25                     | 23.34                 |
| 18035              | Delaware, IN              | -0.046               | 39.86                     | 56.66                 |
| 18037              | Dubois, IN                | -0.049               | 38.49                     | 20.8                  |
| 18039              | Elkhart, IN               | -0.071               | 27.19                     | 77.01                 |
| 18041              | Fayette, IN               | -0.078               | 23.88                     | 61.08                 |
| 18043              | Floyd, IN                 | -0.119               | 9.3                       | 16.69                 |
| 18045              | Fountain, IN              | -0.054               | 35.66                     | 20.32                 |
| 18047              | Franklin, IN              | -0.061               | 32.19                     | 14.71                 |
| 18049              | Fulton, IN                | -0.078               | 23.91                     | 34.59                 |
| 18051              | Gibson, IN                | 0.003                | 63.45                     | 31.5                  |
| 18053              | Grant, IN                 | -0.041               | 42.41                     | 73.31                 |
| 18055              | Greene, IN                | 0.054                | 78.89                     | 44.43                 |
| 18057              | Hamilton, IN              | -0.123               | 8.21                      | 2.55                  |
| 18059              | Hancock, IN               | -0.116               | 9.96                      | 1.69                  |
| 18061              | Harrison, IN              | -0.041               | 42.63                     | 18.66                 |
| 18063              | Hendricks, IN             | -0.098               | 15.79                     | 8.15                  |
| 18065              | Henry, IN                 | -0.038               | 44.44                     | 37.93                 |
| 18067              | Howard, IN                | -0.136               | 5.92                      | 48.15                 |
| 18069              | Huntington, IN            | -0.042               | 42.22                     | 12.48                 |
| 18071              | Jackson, IN               | -0.099               | 15.6                      | 53.89                 |
| 18073              | Jasper, IN                | -0.045               | 40.4                      | 26.85                 |
| 18075              | Jay, IN                   | 0.061                | 80.39                     | 67.48                 |
| 18077              | Jefferson, IN             | 0.027                | 71.82                     | 44.14                 |
| 18079              | Jennings, IN              | -0.016               | 55.05                     | 38.47                 |
| 18081              | Johnson, IN               | -0.093               | 18.21                     | 14.24                 |
| 18083              | Knox, IN                  | -0.05                | 38.27                     | 59.27                 |
| 18085              | Kosciusko, IN             | -0.032               | 47.34                     | 46.08                 |
| 18087              | LaGrange, IN              | 0.266                | 96.62                     | 37.07                 |
| 18089              | Lake, IN                  | -0.017               | 54.7                      | 72.52                 |
| 18091              | LaPorte, IN               | 0.096                | 86.34                     | 72.17                 |
| 18093              | Lawrence, IN              | -0.084               | 21.68                     | 27.52                 |
| 18095              | Madison, IN               | -0.046               | 39.7                      | 67.13                 |
| 18097              | Marion, IN                | -0.126               | 7.35                      | 79.71                 |
| 18099              | Marshall, IN              | 0.061                | 80.55                     | 57.96                 |
| 18101              | Martin, IN                | -0.089               | 19.99                     | 23.98                 |
| 18103              | Miami, IN                 | 0.023                | 70.55                     | 58.79                 |
| 18105              | Monroe, IN                | -0.066               | 29.45                     | 45.19                 |
| 18107              | Montgomery, IN            | -0.072               | 26.62                     | 36.85                 |
| 18109              | Morgan, IN                | -0.034               | 46.29                     | 21.56                 |
| 18111              | Newton, IN                | -0.101               | 14.77                     | 33.66                 |
| 18113              | Noble, IN                 | -0.026               | 50.37                     | 47.42                 |
| 18115              | Ohio, IN                  | -0.16                | 3.31                      | 2.52                  |
| 18117              | Orange, IN                | -0.071               | 27.32                     | 64.55                 |
| 18119              | Owen, IN                  | -0.016               | 55.2                      | 34.55                 |
| 18121              | Parke, IN                 | 0.14                 | 91.37                     | 58.09                 |
| 18123              | Perry, IN                 | -0.052               | 36.77                     | 31.02                 |
| 18125              | Pike, IN                  | -0.104               | 13.88                     | 17.45                 |

| County FIPS | County Description | DOS-SVI Index | DOS-SVI Percentile | SVI Percentile |
|-------------|--------------------|---------------|--------------------|----------------|
| 18127       | Porter, IN         | -0.057        | 34.16              | 14.78          |
| 18129       | Posey, IN          | -0.069        | 28.18              | 1.05           |
| 18131       | Pulaski, IN        | -0.055        | 35.18              | 23.09          |
| 18133       | Putnam, IN         | 0.128         | 90.32              | 34.84          |
| 18135       | Randolph, IN       | -0.131        | 6.75               | 42.96          |
| 18137       | Ripley, IN         | 0.039         | 75.14              | 37.74          |
| 18139       | Rush, IN           | -0.134        | 6.37               | 25.67          |
| 18141       | St. Joseph, IN     | -0.074        | 25.76              | 62.23          |
| 18143       | Scott, IN          | -0.088        | 20.25              | 42.01          |
| 18145       | Shelby, IN         | -0.077        | 24.48              | 21.82          |
| 18147       | Spencer, IN        | -0.064        | 30.15              | 8.79           |
| 18149       | Starke, IN         | -0.041        | 42.34              | 34.17          |
| 18151       | Steuben, IN        | -0.074        | 25.91              | 27.1           |
| 18153       | Sullivan, IN       | 0.056         | 79.27              | 64.01          |
| 18155       | Switzerland, IN    | 0.042         | 76.22              | 62.71          |
| 18157       | Tippecanoe, IN     | -0.086        | 21.04              | 49.3           |
| 18159       | Tipton, IN         | -0.096        | 17.1               | 7.26           |
| 18161       | Union, IN          | -0.092        | 18.62              | 17.13          |
| 18163       | Vanderburgh, IN    | -0.098        | 16.27              | 52.42          |
| 18165       | Vermillion, IN     | -0.024        | 51.19              | 45.03          |
| 18167       | Vigo, IN           | 0.03          | 72.4               | 72.74          |
| 18169       | Wabash, IN         | -0.025        | 50.91              | 28.82          |
| 18171       | Warren, IN         | -0.065        | 29.77              | 7.8            |
| 18173       | Warrick, IN        | -0.054        | 35.88              | 6.78           |
| 18175       | Washington, IN     | -0.035        | 45.81              | 37.77          |
| 18177       | Wayne, IN          | -0.065        | 29.93              | 71.05          |
| 18179       | Wells, IN          | -0.124        | 8.02               | 14.39          |
| 18181       | White, IN          | -0.075        | 25.41              | 24.39          |
| 18183       | Whitley, IN        | -0.13         | 6.94               | 3.15           |
| 19001       | Adair, IA          | -0.093        | 18.43              | 5.38           |
| 19003       | Adams, IA          | -0.056        | 34.48              | 3.76           |
| 19005       | Allamakee, IA      | -0.04         | 43.27              | 32.2           |
| 19007       | Appanoose, IA      | 0.003         | 63.36              | 37.83          |
| 19009       | Audubon, IA        | -0.098        | 16.4               | 2.26           |
| 19011       | Benton, IA         | -0.056        | 34.92              | 1.18           |
| 19013       | Black Hawk, IA     | -0.103        | 14.1               | 42.64          |
| 19015       | Boone, IA          | -0.068        | 28.27              | 11.78          |
| 19017       | Bremer, IA         | -0.045        | 40.56              | 3.22           |
| 19019       | Buchanan, IA       | -0.023        | 51.83              | 6.62           |
| 19021       | Buena Vista, IA    | 0.075         | 83.35              | 74.08          |
| 19023       | Butler, IA         | -0.067        | 28.81              | 2.36           |
| 19025       | Calhoun, IA        | 0.008         | 65.58              | 15.8           |
| 19027       | Carroll, IA        | -0.123        | 8.28               | 4.55           |
| 19029       | Cass, IA           | -0.143        | 4.84               | 19.81          |
| 19031       | Cedar, IA          | -0.06         | 32.63              | 0.8            |
| 19033       | Cerro Gordo, IA    | -0.082        | 22.64              | 24.97          |
| 19035       | Cherokee, IA       | -0.122        | 8.53               | 17.01          |
| 19037       | Chickasaw, IA      | -0.114        | 10.6               | 5.99           |
| 19039       | Clarke, IA         | 0             | 62.02              | 48.47          |
| 19041       | Clay, IA           | -0.075        | 25.63              | 34.39          |
| 19043       | Clayton, IA        | -0.035        | 46.07              | 18.41          |
| 19045       | Clinton, IA        | -0.119        | 9.2                | 26.46          |
| 19047       | Crawford, IA       | 0             | 62.27              | 85.51          |
| 19049       | Dallas, IA         | -0.118        | 9.36               | 5.96           |
| 19051       | Davis, IA          | 0.413         | 98.63              | 35.03          |

| <b>County FIPS</b> | <b>County Description</b> | <b>DOS-SVI Index</b> | <b>DOS-SVI Percentile</b> | <b>SVI Percentile</b> |
|--------------------|---------------------------|----------------------|---------------------------|-----------------------|
| 19053              | Decatur, IA               | 0.109                | 88                        | 68.22                 |
| 19055              | Delaware, IA              | -0.047               | 39.45                     | 3.44                  |
| 19057              | Des Moines, IA            | -0.095               | 17.22                     | 46.53                 |
| 19059              | Dickinson, IA             | -0.139               | 5.44                      | 9.17                  |
| 19061              | Dubuque, IA               | -0.045               | 40.08                     | 23.47                 |
| 19063              | Emmet, IA                 | 0.076                | 83.67                     | 39.46                 |
| 19065              | Fayette, IA               | -0.075               | 25.12                     | 22.52                 |
| 19067              | Floyd, IA                 | -0.059               | 32.95                     | 35.96                 |
| 19069              | Franklin, IA              | -0.081               | 22.95                     | 19.62                 |
| 19071              | Fremont, IA               | 0                    | 62.43                     | 5.54                  |
| 19073              | Greene, IA                | 0.01                 | 66.44                     | 19.78                 |
| 19075              | Grundy, IA                | -0.056               | 34.86                     | 0.38                  |
| 19077              | Guthrie, IA               | -0.07                | 27.6                      | 12.2                  |
| 19079              | Hamilton, IA              | -0.102               | 14.42                     | 11.53                 |
| 19081              | Hancock, IA               | -0.091               | 19.1                      | 7.13                  |
| 19083              | Hardin, IA                | -0.009               | 58.61                     | 12.42                 |
| 19085              | Harrison, IA              | -0.094               | 17.67                     | 6.46                  |
| 19087              | Henry, IA                 | -0.032               | 47.63                     | 31.34                 |
| 19089              | Howard, IA                | -0.066               | 29.26                     | 15.67                 |
| 19091              | Humboldt, IA              | -0.102               | 14.49                     | 14.46                 |
| 19093              | Ida, IA                   | -0.044               | 40.94                     | 8.66                  |
| 19095              | Iowa, IA                  | -0.069               | 27.95                     | 3.47                  |
| 19097              | Jackson, IA               | -0.048               | 38.91                     | 12.68                 |
| 19099              | Jasper, IA                | -0.014               | 56.32                     | 25.48                 |
| 19101              | Jefferson, IA             | 0.004                | 64.06                     | 48.95                 |
| 19103              | Johnson, IA               | -0.127               | 7.2                       | 26.75                 |
| 19105              | Jones, IA                 | 0.026                | 71.67                     | 19.24                 |
| 19107              | Keokuk, IA                | -0.077               | 24.32                     | 3.98                  |
| 19109              | Kossuth, IA               | -0.105               | 13.37                     | 10.48                 |
| 19111              | Lee, IA                   | -0.038               | 44.57                     | 50.41                 |
| 19113              | Linn, IA                  | -0.109               | 12.26                     | 18.06                 |
| 19115              | Louisa, IA                | -0.008               | 58.87                     | 45.7                  |
| 19117              | Lucas, IA                 | -0.123               | 8.25                      | 27.55                 |
| 19119              | Lyon, IA                  | -0.109               | 12.35                     | 4.39                  |
| 19121              | Madison, IA               | -0.053               | 36.52                     | 2.04                  |
| 19123              | Mahaska, IA               | 0.011                | 66.83                     | 46.37                 |
| 19125              | Marion, IA                | -0.039               | 43.68                     | 19.49                 |
| 19127              | Marshall, IA              | -0.04                | 43.04                     | 68.63                 |
| 19129              | Mills, IA                 | -0.03                | 48.58                     | 10.76                 |
| 19131              | Mitchell, IA              | -0.07                | 27.64                     | 8.6                   |
| 19133              | Monona, IA                | -0.107               | 12.83                     | 17.96                 |
| 19135              | Monroe, IA                | 0.007                | 65.01                     | 25.19                 |
| 19137              | Montgomery, IA            | 0.008                | 65.52                     | 52.8                  |
| 19139              | Muscatine, IA             | -0.109               | 11.88                     | 39.04                 |
| 19141              | O'Brien, IA               | -0.01                | 57.98                     | 23.22                 |
| 19143              | Osceola, IA               | -0.018               | 54.25                     | 26.34                 |
| 19145              | Page, IA                  | -0.082               | 22.41                     | 33.41                 |
| 19147              | Palo Alto, IA             | -0.08                | 23.27                     | 17.29                 |
| 19149              | Plymouth, IA              | -0.095               | 17.26                     | 12.71                 |
| 19151              | Pocahontas, IA            | -0.078               | 24                        | 14.62                 |
| 19153              | Polk, IA                  | -0.141               | 5.03                      | 37.68                 |
| 19155              | Pottawattamie, IA         | -0.079               | 23.43                     | 45.99                 |
| 19157              | Poweshiek, IA             | -0.001               | 61.67                     | 15.48                 |
| 19159              | Ringgold, IA              | -0.014               | 56.35                     | 12.99                 |
| 19161              | Sac, IA                   | -0.101               | 14.87                     | 7.48                  |

| <b>County FIPS</b> | <b>County Description</b> | <b>DOS-SVI Index</b> | <b>DOS-SVI Percentile</b> | <b>SVI Percentile</b> |
|--------------------|---------------------------|----------------------|---------------------------|-----------------------|
| 19163              | Scott, IA                 | -0.109               | 12                        | 26.59                 |
| 19165              | Shelby, IA                | -0.051               | 37.73                     | 13.03                 |
| 19167              | Sioux, IA                 | 0.069                | 81.92                     | 22.07                 |
| 19169              | Story, IA                 | -0.147               | 4.39                      | 21.24                 |
| 19171              | Tama, IA                  | 0.003                | 63.67                     | 32.74                 |
| 19173              | Taylor, IA                | -0.09                | 19.23                     | 27.71                 |
| 19175              | Union, IA                 | -0.109               | 11.94                     | 44.55                 |
| 19177              | Van Buren, IA             | 0.057                | 79.59                     | 24.65                 |
| 19179              | Wapello, IA               | -0.008               | 58.99                     | 74.39                 |
| 19181              | Warren, IA                | -0.084               | 21.84                     | 7.2                   |
| 19183              | Washington, IA            | -0.079               | 23.5                      | 22.39                 |
| 19185              | Wayne, IA                 | 0.153                | 92.1                      | 45.83                 |
| 19187              | Webster, IA               | -0.026               | 49.95                     | 45.8                  |
| 19189              | Winnebago, IA             | -0.035               | 45.84                     | 20.61                 |
| 19191              | Winneshiek, IA            | -0.001               | 61.57                     | 1.15                  |
| 19193              | Woodbury, IA              | -0.074               | 26.07                     | 69.68                 |
| 19195              | Worth, IA                 | -0.082               | 22.67                     | 6.97                  |
| 19197              | Wright, IA                | -0.051               | 37.57                     | 48.03                 |
| 20001              | Allen, KS                 | -0.053               | 36.17                     | 39.78                 |
| 20003              | Anderson, KS              | -0.023               | 51.93                     | 22.74                 |
| 20005              | Atchison, KS              | 0.049                | 77.84                     | 49.11                 |
| 20007              | Barber, KS                | -0.09                | 19.42                     | 28.03                 |
| 20009              | Barton, KS                | -0.094               | 17.7                      | 54.39                 |
| 20011              | Bourbon, KS               | 0.06                 | 80.2                      | 58.28                 |
| 20013              | Brown, KS                 | -0.052               | 36.96                     | 27.17                 |
| 20015              | Butler, KS                | 0.039                | 75.04                     | 26.24                 |
| 20017              | Chase, KS                 | 0.062                | 80.71                     | 40.67                 |
| 20019              | Chautauqua, KS            | 0.044                | 76.66                     | 71.88                 |
| 20021              | Cherokee, KS              | -0.06                | 32.66                     | 38.28                 |
| 20023              | Cheyenne, KS              | -0.126               | 7.42                      | 10.03                 |
| 20025              | Clark, KS                 | -0.025               | 50.4                      | 31.24                 |
| 20027              | Clay, KS                  | -0.144               | 4.81                      | 4.94                  |
| 20029              | Cloud, KS                 | -0.08                | 23.14                     | 27.39                 |
| 20031              | Coffey, KS                | -0.031               | 48.2                      | 20.35                 |
| 20033              | Comanche, KS              | -0.032               | 47.25                     | 7.93                  |
| 20035              | Cowley, KS                | -0.004               | 60.43                     | 73.18                 |
| 20037              | Crawford, KS              | 0.086                | 84.94                     | 69.87                 |
| 20039              | Decatur, KS               | -0.158               | 3.57                      | 15.73                 |
| 20041              | Dickinson, KS             | -0.016               | 55.43                     | 33.22                 |
| 20043              | Doniphan, KS              | 0.023                | 70.74                     | 23.06                 |
| 20045              | Douglas, KS               | -0.083               | 22.32                     | 22.32                 |
| 20047              | Edwards, KS               | -0.165               | 2.93                      | 37.2                  |
| 20049              | Elk, KS                   | -0.058               | 33.59                     | 38.95                 |
| 20051              | Ellis, KS                 | -0.099               | 15.66                     | 15.64                 |
| 20053              | Ellsworth, KS             | 0.116                | 88.76                     | 39.52                 |
| 20055              | Finney, KS                | 0.077                | 83.83                     | 82.36                 |
| 20057              | Ford, KS                  | 0.025                | 71.09                     | 85.7                  |
| 20059              | Franklin, KS              | -0.036               | 45.43                     | 21.37                 |
| 20061              | Geary, KS                 | 0.014                | 68.04                     | 65.76                 |
| 20063              | Gove, KS                  | -0.126               | 7.48                      | 9.75                  |
| 20065              | Graham, KS                | -0.151               | 4.01                      | 12.55                 |
| 20067              | Grant, KS                 | -0.053               | 36.39                     | 38.15                 |
| 20069              | Gray, KS                  | -0.077               | 24.42                     | 27.36                 |
| 20071              | Greeley, KS               | -0.074               | 26.04                     | 57.52                 |
| 20073              | Greenwood, KS             | -0.023               | 51.67                     | 21.27                 |

| <b>County FIPS</b> | <b>County Description</b> | <b>DOS-SVI Index</b> | <b>DOS-SVI Percentile</b> | <b>SVI Percentile</b> |
|--------------------|---------------------------|----------------------|---------------------------|-----------------------|
| 20075              | Hamilton, KS              | -0.288               | 0.29                      | 25.86                 |
| 20077              | Harper, KS                | -0.124               | 8.12                      | 32.23                 |
| 20079              | Harvey, KS                | -0.071               | 27.41                     | 33.5                  |
| 20081              | Haskell, KS               | 0.092                | 85.61                     | 41.15                 |
| 20083              | Hodgeman, KS              | -0.019               | 53.87                     | 11.18                 |
| 20085              | Jackson, KS               | -0.039               | 43.81                     | 26.94                 |
| 20087              | Jefferson, KS             | -0.043               | 41.42                     | 5.48                  |
| 20089              | Jewell, KS                | -0.134               | 6.21                      | 8.76                  |
| 20091              | Johnson, KS               | -0.13                | 6.88                      | 6.15                  |
| 20093              | Kearny, KS                | -0.191               | 1.62                      | 46.56                 |
| 20095              | Kingman, KS               | -0.059               | 33.08                     | 5.13                  |
| 20097              | Kiowa, KS                 | -0.015               | 55.87                     | 25.8                  |
| 20099              | Labette, KS               | -0.012               | 57.24                     | 63.92                 |
| 20101              | Lane, KS                  | -0.086               | 20.92                     | 3.03                  |
| 20103              | Leavenworth, KS           | 0.017                | 68.74                     | 24.04                 |
| 20105              | Lincoln, KS               | -0.023               | 51.89                     | 13.22                 |
| 20107              | Linn, KS                  | 0.02                 | 69.66                     | 44.78                 |
| 20109              | Logan, KS                 | -0.063               | 30.88                     | 12.96                 |
| 20111              | Lyon, KS                  | -0.018               | 53.96                     | 73.22                 |
| 20113              | McPherson, KS             | -0.093               | 18.31                     | 10.67                 |
| 20115              | Marion, KS                | 0.012                | 67.02                     | 17.71                 |
| 20117              | Marshall, KS              | -0.028               | 49.28                     | 12.64                 |
| 20119              | Meade, KS                 | -0.11                | 11.65                     | 37.17                 |
| 20121              | Miami, KS                 | -0.044               | 41.01                     | 2.58                  |
| 20123              | Mitchell, KS              | 0.035                | 74.08                     | 28.44                 |
| 20125              | Montgomery, KS            | -0.044               | 40.72                     | 80.29                 |
| 20127              | Morris, KS                | -0.114               | 10.66                     | 24.36                 |
| 20129              | Morton, KS                | -0.174               | 2.23                      | 40.8                  |
| 20131              | Nemaha, KS                | -0.073               | 26.39                     | 9.62                  |
| 20133              | Neosho, KS                | -0.033               | 46.86                     | 65.8                  |
| 20135              | Ness, KS                  | -0.17                | 2.58                      | 15                    |
| 20137              | Norton, KS                | 0.032                | 73                        | 29.75                 |
| 20139              | Osage, KS                 | -0.069               | 27.98                     | 23.41                 |
| 20141              | Osborne, KS               | -0.119               | 9.17                      | 7.23                  |
| 20143              | Ottawa, KS                | -0.088               | 20.44                     | 2.71                  |
| 20145              | Pawnee, KS                | -0.008               | 58.84                     | 28.66                 |
| 20147              | Phillips, KS              | 0.001                | 62.66                     | 24.2                  |
| 20149              | Pottawatomie, KS          | 0.044                | 76.76                     | 14.87                 |
| 20151              | Pratt, KS                 | 0.089                | 85.36                     | 38.73                 |
| 20153              | Rawlins, KS               | -0.104               | 13.79                     | 13.6                  |
| 20155              | Reno, KS                  | 0.026                | 71.57                     | 58.66                 |
| 20157              | Republic, KS              | -0.065               | 30.09                     | 6.05                  |
| 20159              | Rice, KS                  | -0.014               | 56.03                     | 42.52                 |
| 20161              | Riley, KS                 | 0.014                | 67.69                     | 43.73                 |
| 20163              | Rooks, KS                 | -0.089               | 19.9                      | 14.2                  |
| 20165              | Rush, KS                  | -0.114               | 10.54                     | 7.83                  |
| 20167              | Russell, KS               | -0.078               | 24.16                     | 23.92                 |
| 20169              | Saline, KS                | -0.058               | 33.33                     | 41.62                 |
| 20171              | Scott, KS                 | -0.013               | 56.41                     | 30.61                 |
| 20173              | Sedgwick, KS              | -0.089               | 19.77                     | 53.57                 |
| 20175              | Seward, KS                | -0.037               | 45.02                     | 91.11                 |
| 20177              | Shawnee, KS               | -0.042               | 41.71                     | 50.99                 |
| 20179              | Sheridan, KS              | -0.106               | 13.05                     | 6.85                  |
| 20181              | Sherman, KS               | -0.066               | 29.51                     | 49.84                 |
| 20183              | Smith, KS                 | -0.152               | 3.88                      | 5.03                  |



| <b>County FIPS</b> | <b>County Description</b> | <b>DOS-SVI Index</b> | <b>DOS-SVI Percentile</b> | <b>SVI Percentile</b> |
|--------------------|---------------------------|----------------------|---------------------------|-----------------------|
| 20185              | Stafford, KS              | -0.059               | 33.02                     | 27.77                 |
| 20187              | Stanton, KS               | -0.161               | 3.28                      | 49.65                 |
| 20189              | Stevens, KS               | -0.122               | 8.47                      | 67.39                 |
| 20191              | Sumner, KS                | -0.046               | 39.99                     | 22.23                 |
| 20193              | Thomas, KS                | -0.075               | 25.5                      | 7.04                  |
| 20195              | Trego, KS                 | -0.201               | 1.18                      | 3.89                  |
| 20197              | Wabaunsee, KS             | -0.005               | 60.27                     | 5.32                  |
| 20199              | Wallace, KS               | -0.174               | 2.29                      | 14.3                  |
| 20201              | Washington, KS            | -0.09                | 19.32                     | 14.81                 |
| 20203              | Wichita, KS               | -0.037               | 44.89                     | 46.78                 |
| 20205              | Wilson, KS                | -0.007               | 59.34                     | 63.66                 |
| 20207              | Woodson, KS               | -0.068               | 28.46                     | 43.98                 |
| 20209              | Wyandotte, KS             | -0.088               | 20.15                     | 92.42                 |
| 21001              | Adair, KY                 | 0.061                | 80.36                     | 71.21                 |
| 21003              | Allen, KY                 | -0.058               | 33.49                     | 67.96                 |
| 21005              | Anderson, KY              | -0.033               | 47.21                     | 26.37                 |
| 21007              | Ballard, KY               | -0.033               | 46.51                     | 44.59                 |
| 21009              | Barren, KY                | -0.039               | 43.71                     | 77.61                 |
| 21011              | Bath, KY                  | -0.094               | 17.92                     | 72.9                  |
| 21013              | Bell, KY                  | -0.092               | 18.69                     | 89.27                 |
| 21015              | Boone, KY                 | -0.161               | 3.25                      | 12.77                 |
| 21017              | Bourbon, KY               | -0.08                | 23.24                     | 55.61                 |
| 21019              | Boyd, KY                  | -0.06                | 32.7                      | 69.08                 |
| 21021              | Boyle, KY                 | 0.015                | 68.32                     | 43.15                 |
| 21023              | Bracken, KY               | -0.011               | 57.59                     | 38.66                 |
| 21025              | Breathitt, KY             | 0.074                | 82.97                     | 82.2                  |
| 21027              | Breckinridge, KY          | 0.087                | 85.2                      | 73.76                 |
| 21029              | Bullitt, KY               | -0.092               | 18.88                     | 13.85                 |
| 21031              | Butler, KY                | -0.074               | 26.14                     | 79.2                  |
| 21033              | Caldwell, KY              | -0.009               | 58.55                     | 49.81                 |
| 21035              | Calloway, KY              | -0.032               | 47.53                     | 49.97                 |
| 21037              | Campbell, KY              | -0.096               | 17.13                     | 21.88                 |
| 21039              | Carlisle, KY              | -0.056               | 34.58                     | 33.95                 |
| 21041              | Carroll, KY               | 0.162                | 92.77                     | 89.04                 |
| 21043              | Carter, KY                | -0.042               | 42.28                     | 82.04                 |
| 21045              | Casey, KY                 | -0.083               | 22.22                     | 76.56                 |
| 21047              | Christian, KY             | 0.108                | 87.97                     | 91.27                 |
| 21049              | Clark, KY                 | -0.066               | 29.16                     | 60.61                 |
| 21051              | Clay, KY                  | 0.094                | 86.02                     | 90.99                 |
| 21053              | Clinton, KY               | -0.013               | 56.7                      | 77.8                  |
| 21055              | Crittenden, KY            | -0.064               | 30.53                     | 48.44                 |
| 21057              | Cumberland, KY            | 0.002                | 62.91                     | 53.15                 |
| 21059              | Daviess, KY               | -0.005               | 60.24                     | 61.69                 |
| 21061              | Edmonson, KY              | -0.027               | 49.63                     | 63.57                 |
| 21063              | Elliott, KY               | -0.011               | 57.37                     | 72.39                 |
| 21065              | Estill, KY                | -0.044               | 40.97                     | 79.97                 |
| 21067              | Fayette, KY               | -0.137               | 5.83                      | 48.76                 |
| 21069              | Fleming, KY               | -0.03                | 48.74                     | 77.1                  |
| 21071              | Floyd, KY                 | -0.024               | 51.32                     | 85.03                 |
| 21073              | Franklin, KY              | -0.056               | 34.77                     | 54.68                 |
| 21075              | Fulton, KY                | -0.017               | 54.6                      | 87.04                 |
| 21077              | Gallatin, KY              | -0.023               | 52.15                     | 61.24                 |
| 21079              | Garrard, KY               | -0.032               | 47.28                     | 42.99                 |
| 21081              | Grant, KY                 | 0.046                | 77.36                     | 56.02                 |
| 21083              | Graves, KY                | 0.017                | 68.99                     | 77.52                 |

| <b>County FIPS</b> | <b>County Description</b> | <b>DOS-SVI Index</b> | <b>DOS-SVI Percentile</b> | <b>SVI Percentile</b> |
|--------------------|---------------------------|----------------------|---------------------------|-----------------------|
| 21085              | Grayson, KY               | -0.088               | 20.34                     | 60.96                 |
| 21087              | Green, KY                 | -0.146               | 4.65                      | 52.26                 |
| 21089              | Greenup, KY               | -0.06                | 32.57                     | 32.17                 |
| 21091              | Hancock, KY               | -0.105               | 13.66                     | 38.22                 |
| 21093              | Hardin, KY                | -0.042               | 41.96                     | 56.72                 |
| 21095              | Harlan, KY                | -0.071               | 27.25                     | 88.03                 |
| 21097              | Harrison, KY              | -0.036               | 45.65                     | 50.57                 |
| 21099              | Hart, KY                  | -0.014               | 56.22                     | 76.59                 |
| 21101              | Henderson, KY             | -0.099               | 15.54                     | 70.89                 |
| 21103              | Henry, KY                 | -0.023               | 51.86                     | 52.74                 |
| 21105              | Hickman, KY               | -0.046               | 39.92                     | 57.39                 |
| 21107              | Hopkins, KY               | -0.06                | 32.82                     | 55.41                 |
| 21109              | Jackson, KY               | -0.14                | 5.25                      | 66.62                 |
| 21111              | Jefferson, KY             | -0.07                | 27.57                     | 56.82                 |
| 21113              | Jessamine, KY             | -0.039               | 43.9                      | 52.01                 |
| 21115              | Johnson, KY               | -0.011               | 57.53                     | 81.02                 |
| 21117              | Kenton, KY                | -0.102               | 14.58                     | 33.79                 |
| 21119              | Knott, KY                 | 0.185                | 94.05                     | 85.48                 |
| 21121              | Knox, KY                  | -0.048               | 38.71                     | 83.25                 |
| 21123              | Larue, KY                 | -0.121               | 8.76                      | 53.18                 |
| 21125              | Laurel, KY                | 0.003                | 63.42                     | 75.22                 |
| 21127              | Lawrence, KY              | 0.004                | 64.02                     | 75.83                 |
| 21129              | Lee, KY                   | -0.108               | 12.42                     | 81.82                 |
| 21131              | Leslie, KY                | 0.005                | 64.41                     | 77.45                 |
| 21133              | Letcher, KY               | -0.006               | 59.53                     | 87.55                 |
| 21135              | Lewis, KY                 | -0.135               | 6.11                      | 62.42                 |
| 21137              | Lincoln, KY               | 0.007                | 65.14                     | 70.83                 |
| 21139              | Livingston, KY            | -0.05                | 38.05                     | 26.4                  |
| 21141              | Logan, KY                 | -0.044               | 40.66                     | 52.87                 |
| 21143              | Lyon, KY                  | 0.08                 | 84.21                     | 32.52                 |
| 21145              | McCracken, KY             | -0.074               | 25.85                     | 41.53                 |
| 21147              | McCreary, KY              | 0.166                | 93.03                     | 87.8                  |
| 21149              | McLean, KY                | -0.018               | 54.28                     | 42.17                 |
| 21151              | Madison, KY               | -0.082               | 22.76                     | 49.68                 |
| 21153              | Magoffin, KY              | 0.059                | 79.94                     | 80.57                 |
| 21155              | Marion, KY                | 0.058                | 79.88                     | 90.57                 |
| 21157              | Marshall, KY              | -0.003               | 60.94                     | 27.23                 |
| 21159              | Martin, KY                | 0.146                | 91.75                     | 84.94                 |
| 21161              | Mason, KY                 | -0.082               | 22.83                     | 66.82                 |
| 21163              | Meade, KY                 | 0.057                | 79.62                     | 31.78                 |
| 21165              | Menifee, KY               | -0.056               | 34.7                      | 58.47                 |
| 21167              | Mercer, KY                | -0.048               | 39.06                     | 41.34                 |
| 21169              | Metcalfe, KY              | -0.149               | 4.17                      | 68.12                 |
| 21171              | Monroe, KY                | -0.085               | 21.2                      | 69.75                 |
| 21173              | Montgomery, KY            | -0.018               | 53.93                     | 79.87                 |
| 21175              | Morgan, KY                | 0.012                | 67.4                      | 82.93                 |
| 21177              | Muhlenberg, KY            | -0.021               | 53.04                     | 61.34                 |
| 21179              | Nelson, KY                | 0.014                | 67.84                     | 28.95                 |
| 21181              | Nicholas, KY              | 0.038                | 74.85                     | 81.97                 |
| 21183              | Ohio, KY                  | -0.057               | 34.03                     | 57.99                 |
| 21185              | Oldham, KY                | 0.017                | 68.83                     | 3.95                  |
| 21187              | Owen, KY                  | 0.049                | 77.87                     | 52.64                 |
| 21189              | Owsley, KY                | -0.077               | 24.26                     | 84.14                 |
| 21191              | Pendleton, KY             | -0.111               | 11.53                     | 41.5                  |
| 21193              | Perry, KY                 | 0.072                | 82.49                     | 90.51                 |

| <b>County FIPS</b> | <b>County Description</b> | <b>DOS-SVI Index</b> | <b>DOS-SVI Percentile</b> | <b>SVI Percentile</b> |
|--------------------|---------------------------|----------------------|---------------------------|-----------------------|
| 21195              | Pike, KY                  | -0.084               | 21.87                     | 79.08                 |
| 21197              | Powell, KY                | 0.049                | 78                        | 77.32                 |
| 21199              | Pulaski, KY               | -0.068               | 28.24                     | 74.2                  |
| 21201              | Robertson, KY             | -0.16                | 3.38                      | 35.38                 |
| 21203              | Rockcastle, KY            | -0.046               | 40.05                     | 78.82                 |
| 21205              | Rowan, KY                 | 0.031                | 72.68                     | 75.57                 |
| 21207              | Russell, KY               | 0.037                | 74.53                     | 86.34                 |
| 21209              | Scott, KY                 | -0.023               | 52.21                     | 33.31                 |
| 21211              | Shelby, KY                | 0.008                | 65.65                     | 42.61                 |
| 21213              | Simpson, KY               | -0.138               | 5.7                       | 28.79                 |
| 21215              | Spencer, KY               | -0.089               | 19.93                     | 3.69                  |
| 21217              | Taylor, KY                | -0.06                | 32.54                     | 72.1                  |
| 21219              | Todd, KY                  | 0.121                | 89.27                     | 80.92                 |
| 21221              | Trigg, KY                 | 0.033                | 73.48                     | 36.5                  |
| 21223              | Trimble, KY               | 0.067                | 81.47                     | 71.43                 |
| 21225              | Union, KY                 | 0.043                | 76.34                     | 53.66                 |
| 21227              | Warren, KY                | -0.018               | 54.44                     | 70.96                 |
| 21229              | Washington, KY            | -0.032               | 47.66                     | 51.27                 |
| 21231              | Wayne, KY                 | -0.02                | 53.33                     | 74.78                 |
| 21233              | Webster, KY               | -0.04                | 43.62                     | 78.54                 |
| 21235              | Whitley, KY               | 0.024                | 70.9                      | 83.79                 |
| 21237              | Wolfe, KY                 | 0.073                | 82.78                     | 86.21                 |
| 21239              | Woodford, KY              | -0.132               | 6.5                       | 20.41                 |
| 22001              | Acadia, LA                | 0.004                | 63.96                     | 91.82                 |
| 22003              | Allen, LA                 | 0.322                | 97.87                     | 92.61                 |
| 22005              | Ascension, LA             | 0.008                | 65.46                     | 39.68                 |
| 22007              | Assumption, LA            | -0.052               | 37.28                     | 77.9                  |
| 22009              | Avoyelles, LA             | 0.125                | 89.91                     | 96.34                 |
| 22011              | Beauregard, LA            | 0.02                 | 69.69                     | 65.19                 |
| 22013              | Bienville, LA             | 0.081                | 84.24                     | 94.01                 |
| 22015              | Bossier, LA               | -0.025               | 50.68                     | 58.76                 |
| 22017              | Caddo, LA                 | -0.033               | 46.9                      | 83.85                 |
| 22019              | Calcasieu, LA             | -0.021               | 52.63                     | 73.92                 |
| 22021              | Caldwell, LA              | 0.188                | 94.3                      | 93.31                 |
| 22023              | Cameron, LA               | 0.015                | 68.1                      | 26.43                 |
| 22025              | Catahoula, LA             | 0.092                | 85.67                     | 78.06                 |
| 22027              | Claiborne, LA             | 0.126                | 90.07                     | 94.78                 |
| 22029              | Concordia, LA             | 0.205                | 95                        | 91.34                 |
| 22031              | De Soto, LA               | 0.089                | 85.39                     | 89.17                 |
| 22033              | East Baton Rouge, LA      | -0.109               | 12.1                      | 66.53                 |
| 22035              | East Carroll, LA          | 0.644                | 99.39                     | 93.57                 |
| 22037              | East Feliciana, LA        | 0.313                | 97.74                     | 81.85                 |
| 22039              | Evangeline, LA            | 0.099                | 86.53                     | 99.75                 |
| 22041              | Franklin, LA              | 0.098                | 86.44                     | 95.19                 |
| 22043              | Grant, LA                 | 0.073                | 82.84                     | 62.74                 |
| 22045              | Iberia, LA                | 0.103                | 87.17                     | 96.05                 |
| 22047              | Iberville, LA             | 0.147                | 91.82                     | 88.6                  |
| 22049              | Jackson, LA               | 0.022                | 70.26                     | 93.82                 |
| 22051              | Jefferson, LA             | -0.171               | 2.45                      | 61.21                 |
| 22053              | Jefferson Davis, LA       | 0.083                | 84.46                     | 81.05                 |
| 22055              | Lafayette, LA             | -0.075               | 25.37                     | 62.17                 |
| 22057              | Lafourche, LA             | -0.047               | 39.51                     | 76.69                 |
| 22059              | LaSalle, LA               | 0.009                | 66.06                     | 76.34                 |
| 22061              | Lincoln, LA               | 0.074                | 83.13                     | 84.78                 |
| 22063              | Livingston, LA            | 0.006                | 64.82                     | 43.09                 |

| <b>County FIPS</b> | <b>County Description</b> | <b>DOS-SVI Index</b> | <b>DOS-SVI Percentile</b> | <b>SVI Percentile</b> |
|--------------------|---------------------------|----------------------|---------------------------|-----------------------|
| 22065              | Madison, LA               | 0.319                | 97.8                      | 96.97                 |
| 22067              | Morehouse, LA             | 0.05                 | 78.19                     | 88.47                 |
| 22069              | Natchitoches, LA          | 0.026                | 71.51                     | 85.73                 |
| 22071              | Orleans, LA               | 0.021                | 69.85                     | 74.49                 |
| 22073              | Ouachita, LA              | 0.071                | 82.43                     | 85.22                 |
| 22075              | Plaquemines, LA           | -0.033               | 47.15                     | 70.61                 |
| 22077              | Pointe Coupee, LA         | 0.139                | 91.28                     | 84.75                 |
| 22079              | Rapides, LA               | 0.031                | 72.72                     | 90.86                 |
| 22081              | Red River, LA             | -0.012               | 57.12                     | 81.37                 |
| 22083              | Richland, LA              | 0.019                | 69.44                     | 85.54                 |
| 22085              | Sabine, LA                | 0.122                | 89.43                     | 83.15                 |
| 22087              | St. Bernard, LA           | 0.02                 | 69.47                     | 77.13                 |
| 22089              | St. Charles, LA           | 0.023                | 70.52                     | 35.29                 |
| 22091              | St. Helena, LA            | 0.124                | 89.84                     | 90                    |
| 22093              | St. James, LA             | 0.156                | 92.3                      | 62.99                 |
| 22095              | St. John the Baptist, LA  | 0.056                | 79.34                     | 74.68                 |
| 22097              | St. Landry, LA            | 0.061                | 80.29                     | 92.2                  |
| 22099              | St. Martin, LA            | 0.063                | 80.8                      | 78.31                 |
| 22101              | St. Mary, LA              | 0.012                | 66.92                     | 91.62                 |
| 22103              | St. Tammany, LA           | -0.091               | 18.98                     | 31.05                 |
| 22105              | Tangipahoa, LA            | 0.007                | 65.11                     | 88.85                 |
| 22107              | Tensas, LA                | 0.21                 | 95.29                     | 83.66                 |
| 22109              | Terrebonne, LA            | -0.038               | 44.54                     | 89.52                 |
| 22111              | Union, LA                 | 0.105                | 87.49                     | 80.8                  |
| 22113              | Vermilion, LA             | 0.074                | 83                        | 82.01                 |
| 22115              | Vernon, LA                | 0.041                | 75.84                     | 74.33                 |
| 22117              | Washington, LA            | 0.074                | 83.19                     | 99.62                 |
| 22119              | Webster, LA               | -0.016               | 55.4                      | 87.9                  |
| 22121              | West Baton Rouge, LA      | 0.037                | 74.59                     | 76.11                 |
| 22123              | West Carroll, LA          | -0.018               | 54.47                     | 66.85                 |
| 22125              | West Feliciana, LA        | 0.204                | 94.97                     | 69.01                 |
| 22127              | Winn, LA                  | 0.024                | 70.93                     | 77.55                 |
| 23001              | Androscoggin, ME          | -0.026               | 50.08                     | 55.67                 |
| 23003              | Aroostook, ME             | -0.076               | 24.86                     | 59.46                 |
| 23005              | Cumberland, ME            | -0.052               | 37.15                     | 13.63                 |
| 23007              | Franklin, ME              | -0.018               | 54.03                     | 21.5                  |
| 23009              | Hancock, ME               | 0.053                | 78.77                     | 19.3                  |
| 23011              | Kennebec, ME              | 0.004                | 64.09                     | 37.87                 |
| 23013              | Knox, ME                  | -0.018               | 54.31                     | 14.75                 |
| 23015              | Lincoln, ME               | -0.075               | 25.15                     | 11.43                 |
| 23017              | Oxford, ME                | -0.069               | 28.05                     | 37.26                 |
| 23019              | Penobscot, ME             | -0.005               | 60.2                      | 45.32                 |
| 23021              | Piscataquis, ME           | -0.059               | 33.27                     | 48.98                 |
| 23023              | Sagadahoc, ME             | -0.093               | 18.11                     | 5.22                  |
| 23025              | Somerset, ME              | 0.042                | 76.19                     | 62.2                  |
| 23027              | Waldo, ME                 | 0.011                | 66.86                     | 21.97                 |
| 23029              | Washington, ME            | -0.045               | 40.12                     | 64.39                 |
| 23031              | York, ME                  | -0.059               | 33.21                     | 9.36                  |
| 24001              | Allegany, MD              | 0.095                | 86.09                     | 62.1                  |
| 24003              | Anne Arundel, MD          | -0.102               | 14.61                     | 17.83                 |
| 24005              | Baltimore, MD             | -0.153               | 3.82                      | 38.18                 |
| 24009              | Calvert, MD               | -0.054               | 35.82                     | 4.71                  |
| 24011              | Caroline, MD              | -0.028               | 49.57                     | 55.35                 |
| 24013              | Carroll, MD               | -0.071               | 27.38                     | 4.04                  |
| 24015              | Cecil, MD                 | -0.018               | 54.19                     | 29.33                 |

| <b>County FIPS</b> | <b>County Description</b> | <b>DOS-SVI Index</b> | <b>DOS-SVI Percentile</b> | <b>SVI Percentile</b> |
|--------------------|---------------------------|----------------------|---------------------------|-----------------------|
| 24017              | Charles, MD               | -0.065               | 29.67                     | 17.23                 |
| 24019              | Dorchester, MD            | -0.041               | 42.38                     | 75.06                 |
| 24021              | Frederick, MD             | -0.129               | 7                         | 15.89                 |
| 24023              | Garrett, MD               | -0.064               | 30.85                     | 18.12                 |
| 24025              | Harford, MD               | -0.107               | 12.96                     | 9.33                  |
| 24027              | Howard, MD                | -0.146               | 4.58                      | 13.06                 |
| 24029              | Kent, MD                  | -0.011               | 57.69                     | 42.77                 |
| 24031              | Montgomery, MD            | -0.179               | 2.1                       | 32.55                 |
| 24033              | Prince George's, MD       | -0.088               | 20.47                     | 62.61                 |
| 24035              | Queen Anne's, MD          | -0.067               | 28.75                     | 2.2                   |
| 24037              | St. Mary's, MD            | -0.097               | 16.49                     | 20.86                 |
| 24039              | Somerset, MD              | 0.171                | 93.44                     | 89.78                 |
| 24041              | Talbot, MD                | -0.119               | 9.14                      | 13.31                 |
| 24043              | Washington, MD            | -0.012               | 57.05                     | 61.4                  |
| 24045              | Wicomico, MD              | 0.03                 | 72.33                     | 77.39                 |
| 24047              | Worcester, MD             | -0.338               | 0.19                      | 28.03                 |
| 24510              | Baltimore City, MD        | 0.163                | 92.84                     | 83.12                 |
| 25001              | Barnstable, MA            | -0.04                | 42.95                     | 5.64                  |
| 25003              | Berkshire, MA             | -0.048               | 39.1                      | 40.83                 |
| 25005              | Bristol, MA               | -0.1                 | 15.06                     | 52.48                 |
| 25007              | Dukes, MA                 | -0.037               | 44.92                     | 0.96                  |
| 25009              | Essex, MA                 | -0.093               | 18.15                     | 50.8                  |
| 25011              | Franklin, MA              | -0.073               | 26.27                     | 20.96                 |
| 25013              | Hampden, MA               | -0.064               | 30.34                     | 82.32                 |
| 25015              | Hampshire, MA             | 0.06                 | 80.26                     | 23.25                 |
| 25017              | Middlesex, MA             | -0.088               | 20.41                     | 22.64                 |
| 25019              | Nantucket, MA             | -0.021               | 53.1                      | 2.68                  |
| 25021              | Norfolk, MA               | -0.098               | 15.98                     | 20.92                 |
| 25023              | Plymouth, MA              | -0.071               | 27.54                     | 23.03                 |
| 25025              | Suffolk, MA               | 0.044                | 76.89                     | 73.79                 |
| 25027              | Worcester, MA             | -0.035               | 46.13                     | 40.96                 |
| 26001              | Alcona, MI                | -0.071               | 27.03                     | 25.57                 |
| 26003              | Alger, MI                 | 0.086                | 84.97                     | 44.81                 |
| 26005              | Allegan, MI               | -0.006               | 59.5                      | 17.58                 |
| 26007              | Alpena, MI                | -0.073               | 26.36                     | 34.08                 |
| 26009              | Antrim, MI                | -0.053               | 36.55                     | 11.56                 |
| 26011              | Arenac, MI                | -0.031               | 48.01                     | 50.54                 |
| 26013              | Baraga, MI                | 0.189                | 94.36                     | 65.99                 |
| 26015              | Barry, MI                 | 0.003                | 63.71                     | 8.69                  |
| 26017              | Bay, MI                   | -0.086               | 21.08                     | 44.04                 |
| 26019              | Benzie, MI                | -0.029               | 48.9                      | 10.51                 |
| 26021              | Berrien, MI               | -0.01                | 58.04                     | 64.75                 |
| 26023              | Branch, MI                | -0.004               | 60.36                     | 63.15                 |
| 26025              | Calhoun, MI               | -0.085               | 21.27                     | 72.42                 |
| 26027              | Cass, MI                  | 0                    | 62.34                     | 32.8                  |
| 26029              | Charlevoix, MI            | -0.082               | 22.51                     | 9.68                  |
| 26031              | Cheboygan, MI             | -0.041               | 42.85                     | 28.6                  |
| 26033              | Chippewa, MI              | 0.049                | 77.91                     | 72.45                 |
| 26035              | Clare, MI                 | 0.031                | 72.75                     | 77.2                  |
| 26037              | Clinton, MI               | -0.134               | 6.34                      | 4.01                  |
| 26039              | Crawford, MI              | -0.029               | 48.93                     | 36.97                 |
| 26041              | Delta, MI                 | -0.028               | 49.48                     | 35.45                 |
| 26043              | Dickinson, MI             | -0.045               | 40.59                     | 22.96                 |
| 26045              | Eaton, MI                 | -0.107               | 12.73                     | 31.31                 |
| 26047              | Emmet, MI                 | -0.048               | 38.81                     | 13.57                 |

| <b>County FIPS</b> | <b>County Description</b> | <b>DOS-SVI Index</b> | <b>DOS-SVI Percentile</b> | <b>SVI Percentile</b> |
|--------------------|---------------------------|----------------------|---------------------------|-----------------------|
| 26049              | Genesee, MI               | -0.045               | 40.31                     | 66.24                 |
| 26051              | Gladwin, MI               | -0.011               | 57.34                     | 53.98                 |
| 26053              | Gogebic, MI               | 0.044                | 76.73                     | 40.38                 |
| 26055              | Grand Traverse, MI        | -0.023               | 51.8                      | 18.03                 |
| 26057              | Gratiot, MI               | 0.062                | 80.77                     | 60.35                 |
| 26059              | Hillsdale, MI             | 0.026                | 71.38                     | 50.19                 |
| 26061              | Houghton, MI              | 0.104                | 87.36                     | 49.62                 |
| 26063              | Huron, MI                 | -0.036               | 45.4                      | 27.45                 |
| 26065              | Ingham, MI                | -0.065               | 29.74                     | 57.42                 |
| 26067              | Ionia, MI                 | 0.049                | 78.06                     | 47.8                  |
| 26069              | Iosco, MI                 | -0.041               | 42.53                     | 44.94                 |
| 26071              | Iron, MI                  | -0.048               | 38.94                     | 28.25                 |
| 26073              | Isabella, MI              | -0.05                | 38.24                     | 60.16                 |
| 26075              | Jackson, MI               | -0.008               | 58.8                      | 55.06                 |
| 26077              | Kalamazoo, MI             | -0.113               | 11.11                     | 40.7                  |
| 26079              | Kalkaska, MI              | 0.013                | 67.56                     | 50.83                 |
| 26081              | Kent, MI                  | -0.094               | 17.73                     | 47.61                 |
| 26083              | Keweenaw, MI              | 0.02                 | 69.75                     | 7.87                  |
| 26085              | Lake, MI                  | 0.047                | 77.52                     | 78.18                 |
| 26087              | Lapeer, MI                | -0.006               | 59.88                     | 23.82                 |
| 26089              | Leelanau, MI              | -0.012               | 57.27                     | 2.45                  |
| 26091              | Lenawee, MI               | -0.036               | 45.27                     | 40.76                 |
| 26093              | Livingston, MI            | -0.057               | 34.07                     | 0.67                  |
| 26095              | Luce, MI                  | 0.077                | 83.7                      | 53.38                 |
| 26097              | Mackinac, MI              | 0.12                 | 89.17                     | 64.52                 |
| 26099              | Macomb, MI                | -0.089               | 19.55                     | 32.96                 |
| 26101              | Manistee, MI              | 0.033                | 73.42                     | 39.97                 |
| 26103              | Marquette, MI             | -0.029               | 49.22                     | 30.57                 |
| 26105              | Mason, MI                 | -0.055               | 35.24                     | 33.76                 |
| 26107              | Mecosta, MI               | 0.052                | 78.54                     | 59.75                 |
| 26109              | Menominee, MI             | -0.051               | 37.7                      | 27.64                 |
| 26111              | Midland, MI               | -0.037               | 44.8                      | 16.18                 |
| 26113              | Missaukee, MI             | 0.044                | 76.6                      | 47.55                 |
| 26115              | Monroe, MI                | -0.068               | 28.21                     | 14.94                 |
| 26117              | Montcalm, MI              | -0.017               | 54.92                     | 61.27                 |
| 26119              | Montmorency, MI           | -0.01                | 57.82                     | 37.29                 |
| 26121              | Muskegon, MI              | 0.007                | 65.23                     | 70.35                 |
| 26123              | Newaygo, MI               | -0.002               | 61.16                     | 63.18                 |
| 26125              | Oakland, MI               | -0.122               | 8.63                      | 11.4                  |
| 26127              | Oceana, MI                | 0.117                | 88.86                     | 85.8                  |
| 26129              | Ogemaw, MI                | 0.006                | 64.95                     | 62.58                 |
| 26131              | Ontonagon, MI             | -0.001               | 61.8                      | 27.32                 |
| 26133              | Osceola, MI               | 0.041                | 76                        | 74.01                 |
| 26135              | Oscoda, MI                | 0.062                | 80.61                     | 66.94                 |
| 26137              | Otsego, MI                | 0.007                | 65.39                     | 36.94                 |
| 26139              | Ottawa, MI                | -0.04                | 43.3                      | 21.72                 |
| 26141              | Presque Isle, MI          | -0.04                | 43.17                     | 27.61                 |
| 26143              | Roscommon, MI             | -0.019               | 53.42                     | 46.27                 |
| 26145              | Saginaw, MI               | -0.024               | 51.38                     | 70.48                 |
| 26147              | St. Clair, MI             | -0.067               | 28.94                     | 27.9                  |
| 26149              | St. Joseph, MI            | -0.01                | 57.91                     | 65.16                 |
| 26151              | Sanilac, MI               | -0.038               | 44.51                     | 48.34                 |
| 26153              | Schoolcraft, MI           | -0.028               | 49.32                     | 54.52                 |
| 26155              | Shiawassee, MI            | -0.095               | 17.48                     | 13.25                 |
| 26157              | Tuscola, MI               | -0.002               | 61.35                     | 39.59                 |

| <b>County FIPS</b> | <b>County Description</b> | <b>DOS-SVI Index</b> | <b>DOS-SVI Percentile</b> | <b>SVI Percentile</b> |
|--------------------|---------------------------|----------------------|---------------------------|-----------------------|
| 26159              | Van Buren, MI             | 0.01                 | 66.28                     | 65.89                 |
| 26161              | Washtenaw, MI             | -0.062               | 31.68                     | 22.36                 |
| 26163              | Wayne, MI                 | -0.008               | 58.93                     | 87.23                 |
| 26165              | Wexford, MI               | -0.024               | 51.45                     | 50.35                 |
| 27001              | Aitkin, MN                | -0.006               | 59.6                      | 30.83                 |
| 27003              | Anoka, MN                 | -0.086               | 20.95                     | 14.04                 |
| 27005              | Becker, MN                | -0.042               | 41.77                     | 29.9                  |
| 27007              | Beltrami, MN              | 0.046                | 77.46                     | 77.71                 |
| 27009              | Benton, MN                | -0.127               | 7.23                      | 43.18                 |
| 27011              | Big Stone, MN             | -0.114               | 10.51                     | 20.06                 |
| 27013              | Blue Earth, MN            | -0.113               | 11.08                     | 28.38                 |
| 27015              | Brown, MN                 | -0.107               | 12.8                      | 12.74                 |
| 27017              | Carlton, MN               | 0.027                | 71.73                     | 26.66                 |
| 27019              | Carver, MN                | -0.085               | 21.49                     | 1.24                  |
| 27021              | Cass, MN                  | 0.045                | 77.14                     | 35                    |
| 27023              | Chippewa, MN              | -0.127               | 7.16                      | 35.22                 |
| 27025              | Chisago, MN               | -0.03                | 48.84                     | 5.92                  |
| 27027              | Clay, MN                  | -0.125               | 7.61                      | 22.17                 |
| 27029              | Clearwater, MN            | 0.045                | 77.2                      | 79.17                 |
| 27031              | Cook, MN                  | 0.294                | 97.36                     | 20.29                 |
| 27033              | Cottonwood, MN            | -0.005               | 60.3                      | 47.26                 |
| 27035              | Crow Wing, MN             | -0.108               | 12.61                     | 12.23                 |
| 27037              | Dakota, MN                | -0.18                | 1.97                      | 12.07                 |
| 27039              | Dodge, MN                 | -0.105               | 13.63                     | 5.73                  |
| 27041              | Douglas, MN               | -0.139               | 5.51                      | 4.46                  |
| 27043              | Faribault, MN             | -0.113               | 10.89                     | 15.7                  |
| 27045              | Fillmore, MN              | -0.024               | 51.13                     | 21.69                 |
| 27047              | Freeborn, MN              | -0.153               | 3.85                      | 43.28                 |
| 27049              | Goodhue, MN               | -0.081               | 23.08                     | 17.07                 |
| 27051              | Grant, MN                 | -0.104               | 13.98                     | 9.46                  |
| 27053              | Hennepin, MN              | -0.17                | 2.55                      | 30.92                 |
| 27055              | Houston, MN               | -0.095               | 17.32                     | 1.85                  |
| 27057              | Hubbard, MN               | 0.014                | 68.07                     | 20.51                 |
| 27059              | Isanti, MN                | -0.08                | 23.21                     | 10.22                 |
| 27061              | Itasca, MN                | 0.022                | 70.23                     | 32.93                 |
| 27063              | Jackson, MN               | -0.083               | 22.13                     | 3.06                  |
| 27065              | Kanabec, MN               | -0.035               | 46.1                      | 28.41                 |
| 27067              | Kandiyohi, MN             | -0.082               | 22.45                     | 40.64                 |
| 27069              | Kittson, MN               | -0.052               | 37.22                     | 9.97                  |
| 27071              | Koochiching, MN           | -0.089               | 20.09                     | 43.66                 |
| 27073              | Lac qui Parle, MN         | -0.115               | 10.16                     | 10.06                 |
| 27075              | Lake, MN                  | -0.024               | 51.64                     | 11.02                 |
| 27077              | Lake of the Woods, MN     | -0.016               | 55.11                     | 15.76                 |
| 27079              | Le Sueur, MN              | -0.061               | 31.8                      | 11.46                 |
| 27081              | Lincoln, MN               | -0.096               | 17                        | 6.66                  |
| 27083              | Lyon, MN                  | -0.052               | 37.47                     | 45.32                 |
| 27085              | McLeod, MN                | -0.162               | 3.12                      | 12.61                 |
| 27087              | Mahnomen, MN              | 0.065                | 81.15                     | 87.17                 |
| 27089              | Marshall, MN              | -0.114               | 10.44                     | 14.11                 |
| 27091              | Martin, MN                | -0.138               | 5.79                      | 19.33                 |
| 27093              | Meeker, MN                | -0.005               | 60.08                     | 18.69                 |
| 27095              | Mille Lacs, MN            | -0.008               | 59.03                     | 59.17                 |
| 27097              | Morrison, MN              | -0.049               | 38.52                     | 26.82                 |
| 27099              | Mower, MN                 | -0.061               | 32.09                     | 62.83                 |
| 27101              | Murray, MN                | -0.118               | 9.52                      | 10.64                 |

| <b>County FIPS</b> | <b>County Description</b> | <b>DOS-SVI Index</b> | <b>DOS-SVI Percentile</b> | <b>SVI Percentile</b> |
|--------------------|---------------------------|----------------------|---------------------------|-----------------------|
| 27103              | Nicollet, MN              | -0.077               | 24.55                     | 25.13                 |
| 27105              | Nobles, MN                | -0.16                | 3.41                      | 81.5                  |
| 27107              | Norman, MN                | -0.021               | 53.07                     | 32.48                 |
| 27109              | Olmsted, MN               | -0.071               | 27.48                     | 25.99                 |
| 27111              | Otter Tail, MN            | -0.049               | 38.68                     | 20.99                 |
| 27113              | Pennington, MN            | -0.098               | 16.33                     | 30.16                 |
| 27115              | Pine, MN                  | -0.003               | 60.78                     | 46.31                 |
| 27117              | Pipestone, MN             | -0.116               | 9.93                      | 46.46                 |
| 27119              | Polk, MN                  | -0.095               | 17.54                     | 36.69                 |
| 27121              | Pope, MN                  | -0.078               | 23.78                     | 3.15                  |
| 27123              | Ramsey, MN                | -0.115               | 10.12                     | 63.34                 |
| 27125              | Red Lake, MN              | -0.029               | 49.09                     | 15.25                 |
| 27127              | Redwood, MN               | -0.119               | 9.23                      | 22.93                 |
| 27129              | Renville, MN              | -0.095               | 17.41                     | 19.68                 |
| 27131              | Rice, MN                  | 0.038                | 74.82                     | 39.3                  |
| 27133              | Rock, MN                  | -0.072               | 26.65                     | 15.32                 |
| 27135              | Roseau, MN                | -0.06                | 32.38                     | 24.78                 |
| 27137              | St. Louis, MN             | -0.029               | 49.03                     | 31.18                 |
| 27139              | Scott, MN                 | -0.006               | 59.76                     | 11.08                 |
| 27141              | Sherburne, MN             | -0.066               | 29.04                     | 8.85                  |
| 27143              | Sibley, MN                | -0.098               | 16.08                     | 13.15                 |
| 27145              | Stearns, MN               | -0.075               | 24.99                     | 38.85                 |
| 27147              | Steele, MN                | -0.038               | 44.63                     | 30.13                 |
| 27149              | Stevens, MN               | -0.105               | 13.69                     | 22.58                 |
| 27151              | Swift, MN                 | -0.14                | 5.29                      | 32.13                 |
| 27153              | Todd, MN                  | 0.019                | 69.37                     | 48.12                 |
| 27155              | Traverse, MN              | -0.091               | 18.94                     | 26.02                 |
| 27157              | Wabasha, MN               | -0.107               | 12.86                     | 5.89                  |
| 27159              | Wadena, MN                | 0.007                | 65.42                     | 65.54                 |
| 27161              | Waseca, MN                | -0.04                | 43.59                     | 25.03                 |
| 27163              | Washington, MN            | -0.085               | 21.23                     | 6.82                  |
| 27165              | Watonwan, MN              | -0.181               | 1.91                      | 51.91                 |
| 27167              | Wilkin, MN                | -0.075               | 25.31                     | 19.24                 |
| 27169              | Winona, MN                | -0.05                | 38.33                     | 21.15                 |
| 27171              | Wright, MN                | -0.043               | 41.45                     | 4.62                  |
| 27173              | Yellow Medicine, MN       | -0.088               | 20.38                     | 33.44                 |
| 28001              | Adams, MS                 | -0.029               | 49.16                     | 99.14                 |
| 28003              | Alcorn, MS                | -0.067               | 28.68                     | 69.55                 |
| 28005              | Amite, MS                 | -0.001               | 61.7                      | 81.91                 |
| 28007              | Attala, MS                | 0.107                | 87.78                     | 98.44                 |
| 28009              | Benton, MS                | -0.112               | 11.27                     | 66.05                 |
| 28011              | Bolivar, MS               | 0.012                | 67.3                      | 96.75                 |
| 28013              | Calhoun, MS               | 0.029                | 72.11                     | 96.5                  |
| 28015              | Carroll, MS               | 0.14                 | 91.34                     | 63.03                 |
| 28017              | Chickasaw, MS             | -0.029               | 49.06                     | 91.43                 |
| 28019              | Choctaw, MS               | 0.038                | 74.98                     | 85.41                 |
| 28021              | Claiborne, MS             | 0.327                | 97.99                     | 99.2                  |
| 28023              | Clarke, MS                | -0.09                | 19.2                      | 66.69                 |
| 28025              | Clay, MS                  | 0.002                | 62.97                     | 70.54                 |
| 28027              | Coahoma, MS               | 0.159                | 92.55                     | 93.22                 |
| 28029              | Copiah, MS                | 0.176                | 93.66                     | 94.11                 |
| 28031              | Covington, MS             | 0.013                | 67.43                     | 78.79                 |
| 28033              | DeSoto, MS                | -0.012               | 57.02                     | 30.32                 |
| 28035              | Forrest, MS               | -0.02                | 53.39                     | 93.66                 |
| 28037              | Franklin, MS              | -0.024               | 51.26                     | 57.17                 |



| <b>County FIPS</b> | <b>County Description</b> | <b>DOS-SVI Index</b> | <b>DOS-SVI Percentile</b> | <b>SVI Percentile</b> |
|--------------------|---------------------------|----------------------|---------------------------|-----------------------|
| 28039              | George, MS                | 0.012                | 67.21                     | 61.37                 |
| 28041              | Greene, MS                | 0.309                | 97.64                     | 60.67                 |
| 28043              | Grenada, MS               | -0.029               | 49.19                     | 87.71                 |
| 28045              | Hancock, MS               | -0.063               | 31.01                     | 59.24                 |
| 28047              | Harrison, MS              | -0.041               | 42.82                     | 88.38                 |
| 28049              | Hinds, MS                 | 0.067                | 81.6                      | 87.42                 |
| 28051              | Holmes, MS                | 0.262                | 96.53                     | 98.18                 |
| 28053              | Humphreys, MS             | 0.203                | 94.91                     | 93.69                 |
| 28055              | Issaquena, MS             | 0.287                | 97.23                     | 95.1                  |
| 28057              | Itawamba, MS              | -0.102               | 14.64                     | 54.87                 |
| 28059              | Jackson, MS               | -0.113               | 10.95                     | 54.33                 |
| 28061              | Jasper, MS                | -0.004               | 60.52                     | 76.91                 |
| 28063              | Jefferson, MS             | 0.132                | 90.58                     | 96.37                 |
| 28065              | Jefferson Davis, MS       | 0.056                | 79.24                     | 84.39                 |
| 28067              | Jones, MS                 | 0.007                | 65.27                     | 89.2                  |
| 28069              | Kemper, MS                | 0.185                | 94.08                     | 92.74                 |
| 28071              | Lafayette, MS             | -0.027               | 49.89                     | 50.96                 |
| 28073              | Lamar, MS                 | -0.008               | 59.06                     | 53.06                 |
| 28075              | Lauderdale, MS            | 0.045                | 77.11                     | 92.83                 |
| 28077              | Lawrence, MS              | 0.064                | 81.06                     | 66.34                 |
| 28079              | Leake, MS                 | 0.093                | 85.77                     | 99.46                 |
| 28081              | Lee, MS                   | 0.045                | 77.08                     | 79.52                 |
| 28083              | Leflore, MS               | 0.172                | 93.54                     | 96.53                 |
| 28085              | Lincoln, MS               | 0.043                | 76.38                     | 75.86                 |
| 28087              | Lowndes, MS               | 0                    | 62.37                     | 79.75                 |
| 28089              | Madison, MS               | -0.056               | 34.73                     | 28.98                 |
| 28091              | Marion, MS                | 0.105                | 87.39                     | 93.5                  |
| 28093              | Marshall, MS              | 0.029                | 72.08                     | 69.04                 |
| 28095              | Monroe, MS                | -0.001               | 61.51                     | 63.98                 |
| 28097              | Montgomery, MS            | -0.043               | 41.39                     | 89.14                 |
| 28099              | Neshoba, MS               | 0.268                | 96.78                     | 96.85                 |
| 28101              | Newton, MS                | 0.116                | 88.7                      | 92.13                 |
| 28103              | Noxubee, MS               | 0.166                | 93                        | 98.6                  |
| 28105              | Oktibbeha, MS             | 0.048                | 77.81                     | 64.2                  |
| 28107              | Panola, MS                | 0.039                | 75.1                      | 89.33                 |
| 28109              | Pearl River, MS           | 0.03                 | 72.56                     | 70.51                 |
| 28111              | Perry, MS                 | -0.018               | 54.38                     | 70.86                 |
| 28113              | Pike, MS                  | 0                    | 61.86                     | 98.82                 |
| 28115              | Pontotoc, MS              | 0.083                | 84.56                     | 89.62                 |
| 28117              | Prentiss, MS              | 0.033                | 73.51                     | 85.13                 |
| 28119              | Quitman, MS               | 0.335                | 98.09                     | 95.45                 |
| 28121              | Rankin, MS                | -0.011               | 57.62                     | 31.27                 |
| 28123              | Scott, MS                 | 0.057                | 79.69                     | 98.5                  |
| 28125              | Sharkey, MS               | 0.339                | 98.22                     | 97.29                 |
| 28127              | Simpson, MS               | 0.129                | 90.45                     | 90.73                 |
| 28129              | Smith, MS                 | -0.097               | 16.65                     | 47.32                 |
| 28131              | Stone, MS                 | 0.149                | 91.91                     | 60.45                 |
| 28133              | Sunflower, MS             | 0.338                | 98.19                     | 94.94                 |
| 28135              | Tallahatchie, MS          | 0.28                 | 97.07                     | 97.36                 |
| 28137              | Tate, MS                  | 0.205                | 95.03                     | 86.5                  |
| 28139              | Tippah, MS                | 0.023                | 70.77                     | 86.46                 |
| 28141              | Tishomingo, MS            | -0.017               | 54.85                     | 66.59                 |
| 28143              | Tunica, MS                | 0.064                | 80.99                     | 97.2                  |
| 28145              | Union, MS                 | -0.013               | 56.48                     | 82.77                 |
| 28147              | Walthall, MS              | 0.046                | 77.4                      | 86.11                 |

| <b>County FIPS</b> | <b>County Description</b> | <b>DOS-SVI Index</b> | <b>DOS-SVI Percentile</b> | <b>SVI Percentile</b> |
|--------------------|---------------------------|----------------------|---------------------------|-----------------------|
| 28149              | Warren, MS                | 0.003                | 63.64                     | 86.05                 |
| 28151              | Washington, MS            | 0.106                | 87.65                     | 97.83                 |
| 28153              | Wayne, MS                 | 0.011                | 66.89                     | 89.97                 |
| 28155              | Webster, MS               | -0.15                | 4.04                      | 59.62                 |
| 28157              | Wilkinson, MS             | 0.076                | 83.6                      | 91.69                 |
| 28159              | Winston, MS               | 0.077                | 83.73                     | 93.06                 |
| 28161              | Yalobusha, MS             | 0.068                | 81.66                     | 73.47                 |
| 28163              | Yazoo, MS                 | 0.282                | 97.14                     | 99.52                 |
| 29001              | Adair, MO                 | 0.011                | 66.6                      | 45.48                 |
| 29003              | Andrew, MO                | -0.039               | 43.74                     | 3.25                  |
| 29005              | Atchison, MO              | -0.075               | 25.02                     | 7.36                  |
| 29007              | Audrain, MO               | 0.04                 | 75.52                     | 61.5                  |
| 29009              | Barry, MO                 | 0.033                | 73.73                     | 70.99                 |
| 29011              | Barton, MO                | 0.029                | 72.21                     | 59.94                 |
| 29013              | Bates, MO                 | 0.044                | 76.69                     | 38.57                 |
| 29015              | Benton, MO                | 0.009                | 65.87                     | 55.13                 |
| 29017              | Bollinger, MO             | -0.071               | 27.22                     | 47.93                 |
| 29019              | Boone, MO                 | -0.062               | 31.71                     | 29.27                 |
| 29021              | Buchanan, MO              | -0.02                | 53.14                     | 71.82                 |
| 29023              | Butler, MO                | -0.069               | 27.89                     | 81.72                 |
| 29025              | Caldwell, MO              | 0.112                | 88.22                     | 45.13                 |
| 29027              | Callaway, MO              | -0.012               | 56.86                     | 32.32                 |
| 29029              | Camden, MO                | -0.23                | 0.51                      | 33.63                 |
| 29031              | Cape Girardeau, MO        | -0.014               | 55.94                     | 41.18                 |
| 29033              | Carroll, MO               | 0.021                | 69.88                     | 53.25                 |
| 29035              | Carter, MO                | 0.037                | 74.63                     | 74.55                 |
| 29037              | Cass, MO                  | -0.041               | 42.66                     | 11.88                 |
| 29039              | Cedar, MO                 | -0.044               | 40.85                     | 64.11                 |
| 29041              | Chariton, MO              | -0.036               | 45.53                     | 18.98                 |
| 29043              | Christian, MO             | -0.024               | 51.48                     | 14.97                 |
| 29045              | Clark, MO                 | -0.018               | 54.16                     | 34.2                  |
| 29047              | Clay, MO                  | -0.13                | 6.81                      | 13.63                 |
| 29049              | Clinton, MO               | -0.051               | 37.95                     | 16.43                 |
| 29051              | Cole, MO                  | -0.028               | 49.38                     | 25.83                 |
| 29053              | Cooper, MO                | 0.034                | 73.8                      | 38.92                 |
| 29055              | Crawford, MO              | -0.026               | 50.11                     | 75.54                 |
| 29057              | Dade, MO                  | 0.057                | 79.56                     | 66.37                 |
| 29059              | Dallas, MO                | -0.003               | 60.84                     | 70.19                 |
| 29061              | Daviess, MO               | 0.059                | 79.97                     | 47.07                 |
| 29063              | DeKalb, MO                | 0.247                | 96.21                     | 40.54                 |
| 29065              | Dent, MO                  | -0.037               | 44.83                     | 63.12                 |
| 29067              | Douglas, MO               | -0.03                | 48.81                     | 52.32                 |
| 29069              | Dunklin, MO               | -0.055               | 35.31                     | 95.8                  |
| 29071              | Franklin, MO              | -0.072               | 26.58                     | 14.59                 |
| 29073              | Gasconade, MO             | -0.115               | 10.25                     | 8.54                  |
| 29075              | Gentry, MO                | -0.013               | 56.54                     | 43.89                 |
| 29077              | Greene, MO                | -0.089               | 19.68                     | 43.95                 |
| 29079              | Grundy, MO                | -0.033               | 47.12                     | 61.85                 |
| 29081              | Harrison, MO              | -0.052               | 36.74                     | 74.17                 |
| 29083              | Henry, MO                 | -0.013               | 56.64                     | 59.59                 |
| 29085              | Hickory, MO               | -0.081               | 22.92                     | 46.72                 |
| 29087              | Holt, MO                  | -0.058               | 33.4                      | 19.59                 |
| 29089              | Howard, MO                | -0.006               | 59.95                     | 40.41                 |
| 29091              | Howell, MO                | -0.062               | 31.49                     | 67.17                 |
| 29093              | Iron, MO                  | 0.034                | 73.83                     | 78.22                 |

| <b>County FIPS</b> | <b>County Description</b> | <b>DOS-SVI Index</b> | <b>DOS-SVI Percentile</b> | <b>SVI Percentile</b> |
|--------------------|---------------------------|----------------------|---------------------------|-----------------------|
| 29095              | Jackson, MO               | -0.116               | 10.03                     | 53.54                 |
| 29097              | Jasper, MO                | -0.032               | 47.56                     | 65.64                 |
| 29099              | Jefferson, MO             | -0.055               | 35.5                      | 18.63                 |
| 29101              | Johnson, MO               | 0.116                | 88.67                     | 35.06                 |
| 29103              | Knox, MO                  | -0.062               | 31.45                     | 55.7                  |
| 29105              | Laclede, MO               | 0.054                | 79.02                     | 61.78                 |
| 29107              | Lafayette, MO             | -0.004               | 60.4                      | 38.82                 |
| 29109              | Lawrence, MO              | 0.026                | 71.63                     | 78.66                 |
| 29111              | Lewis, MO                 | 0.069                | 82.14                     | 44.65                 |
| 29113              | Lincoln, MO               | -0.034               | 46.42                     | 29.39                 |
| 29115              | Linn, MO                  | -0.078               | 23.72                     | 27.2                  |
| 29117              | Livingston, MO            | 0.001                | 62.69                     | 37.48                 |
| 29119              | McDonald, MO              | 0.123                | 89.49                     | 86.31                 |
| 29121              | Macon, MO                 | -0.045               | 40.43                     | 58.6                  |
| 29123              | Madison, MO               | -0.009               | 58.29                     | 47.77                 |
| 29125              | Maries, MO                | 0.033                | 73.67                     | 51.18                 |
| 29127              | Marion, MO                | -0.017               | 54.73                     | 54.59                 |
| 29129              | Mercer, MO                | -0.012               | 57.15                     | 30.45                 |
| 29131              | Miller, MO                | -0.085               | 21.52                     | 50.1                  |
| 29133              | Mississippi, MO           | 0.144                | 91.59                     | 90.76                 |
| 29135              | Moniteau, MO              | 0.107                | 87.71                     | 51.43                 |
| 29137              | Monroe, MO                | -0.058               | 33.46                     | 38.76                 |
| 29139              | Montgomery, MO            | -0.024               | 51.1                      | 53.31                 |
| 29141              | Morgan, MO                | -0.097               | 16.91                     | 62.9                  |
| 29143              | New Madrid, MO            | -0.006               | 59.47                     | 89.68                 |
| 29145              | Newton, MO                | -0.023               | 51.99                     | 43.41                 |
| 29147              | Nodaway, MO               | 0.032                | 73.26                     | 22.2                  |
| 29149              | Oregon, MO                | -0.134               | 6.18                      | 48.85                 |
| 29151              | Osage, MO                 | -0.013               | 56.77                     | 4.97                  |
| 29153              | Ozark, MO                 | -0.021               | 52.95                     | 58.25                 |
| 29155              | Pemiscot, MO              | 0.025                | 71.28                     | 93.03                 |
| 29157              | Perry, MO                 | -0.022               | 52.44                     | 23.12                 |
| 29159              | Pettis, MO                | -0.052               | 37.25                     | 80.35                 |
| 29161              | Phelps, MO                | -0.005               | 60.17                     | 65.96                 |
| 29163              | Pike, MO                  | 0.044                | 76.57                     | 53.76                 |
| 29165              | Platte, MO                | -0.14                | 5.22                      | 9.59                  |
| 29167              | Polk, MO                  | 0.043                | 76.44                     | 59.87                 |
| 29169              | Pulaski, MO               | 0.168                | 93.16                     | 65.03                 |
| 29171              | Putnam, MO                | -0.045               | 40.62                     | 57.64                 |
| 29173              | Ralls, MO                 | -0.057               | 34.1                      | 10.45                 |
| 29175              | Randolph, MO              | 0.007                | 65.2                      | 55.54                 |
| 29177              | Ray, MO                   | -0.051               | 37.85                     | 25.73                 |
| 29179              | Reynolds, MO              | -0.084               | 21.97                     | 55.73                 |
| 29181              | Ripley, MO                | -0.111               | 11.49                     | 71.5                  |
| 29183              | St. Charles, MO           | -0.113               | 10.86                     | 3.63                  |
| 29185              | St. Clair, MO             | -0.078               | 24.07                     | 49.87                 |
| 29186              | Ste. Genevieve, MO        | -0.102               | 14.33                     | 18.85                 |
| 29187              | St. Francois, MO          | 0.034                | 73.99                     | 70.16                 |
| 29189              | St. Louis, MO             | -0.095               | 17.45                     | 26.11                 |
| 29195              | Saline, MO                | -0.018               | 54.35                     | 81.62                 |
| 29197              | Schuyler, MO              | -0.053               | 36.64                     | 38.31                 |
| 29199              | Scotland, MO              | 0.075                | 83.38                     | 53.03                 |
| 29201              | Scott, MO                 | -0.007               | 59.19                     | 78.44                 |
| 29203              | Shannon, MO               | -0.066               | 29.23                     | 64.49                 |
| 29205              | Shelby, MO                | 0.006                | 64.92                     | 39.84                 |

| <b>County FIPS</b> | <b>County Description</b> | <b>DOS-SVI Index</b> | <b>DOS-SVI Percentile</b> | <b>SVI Percentile</b> |
|--------------------|---------------------------|----------------------|---------------------------|-----------------------|
| 29207              | Stoddard, MO              | -0.083               | 22.16                     | 46.43                 |
| 29209              | Stone, MO                 | -0.052               | 36.8                      | 34.87                 |
| 29211              | Sullivan, MO              | -0.009               | 58.52                     | 62.96                 |
| 29213              | Taney, MO                 | -0.117               | 9.65                      | 82.17                 |
| 29215              | Texas, MO                 | -0.003               | 60.68                     | 83.03                 |
| 29217              | Vernon, MO                | 0.008                | 65.78                     | 45.1                  |
| 29219              | Warren, MO                | 0.101                | 86.76                     | 38.41                 |
| 29221              | Washington, MO            | 0.019                | 69.41                     | 79.04                 |
| 29223              | Wayne, MO                 | 0.003                | 63.61                     | 76.46                 |
| 29225              | Webster, MO               | 0.107                | 87.84                     | 63.85                 |
| 29227              | Worth, MO                 | -0.112               | 11.33                     | 22.39                 |
| 29229              | Wright, MO                | 0.063                | 80.9                      | 90.06                 |
| 29510              | St. Louis City, MO        | -0.011               | 57.66                     | 77.96                 |
| 30001              | Beaverhead, MT            | 0.01                 | 66.25                     | 25.16                 |
| 30003              | Big Horn, MT              | 0.866                | 99.68                     | 82.74                 |
| 30005              | Blaine, MT                | 0.337                | 98.12                     | 91.5                  |
| 30007              | Broadwater, MT            | -0.099               | 15.51                     | 4.2                   |
| 30009              | Carbon, MT                | -0.092               | 18.82                     | 4.33                  |
| 30011              | Carter, MT                | -0.045               | 40.53                     | 4.87                  |
| 30013              | Cascade, MT               | -0.045               | 40.21                     | 41.02                 |
| 30015              | Chouteau, MT              | 0.03                 | 72.59                     | 47.99                 |
| 30017              | Custer, MT                | -0.122               | 8.34                      | 29.01                 |
| 30019              | Daniels, MT               | -0.126               | 7.51                      | 2.42                  |
| 30021              | Dawson, MT                | -0.006               | 59.85                     | 7.52                  |
| 30023              | Deer Lodge, MT            | -0.04                | 43.36                     | 47.17                 |
| 30025              | Fallon, MT                | -0.046               | 39.83                     | 2.17                  |
| 30027              | Fergus, MT                | 0.039                | 75.17                     | 23.76                 |
| 30029              | Flathead, MT              | -0.007               | 59.28                     | 9.24                  |
| 30031              | Gallatin, MT              | -0.026               | 50.05                     | 4.27                  |
| 30033              | Garfield, MT              | 0.047                | 77.65                     | 0.76                  |
| 30035              | Glacier, MT               | 0.239                | 95.96                     | 85.83                 |
| 30037              | Golden Valley, MT         | -0.135               | 6.14                      | 5.19                  |
| 30039              | Granite, MT               | -0.024               | 51.58                     | 7.64                  |
| 30041              | Hill, MT                  | -0.049               | 38.65                     | 69.84                 |
| 30043              | Jefferson, MT             | 0.012                | 67.24                     | 4.81                  |
| 30045              | Judith Basin, MT          | -0.12                | 8.98                      | 1.62                  |
| 30047              | Lake, MT                  | 0.064                | 81.09                     | 64.68                 |
| 30049              | Lewis and Clark, MT       | -0.051               | 37.76                     | 12.58                 |
| 30051              | Liberty, MT               | -0.189               | 1.72                      | 40.99                 |
| 30053              | Lincoln, MT               | -0.037               | 45.11                     | 41.94                 |
| 30055              | McCone, MT                | 0.033                | 73.58                     | 7.74                  |
| 30057              | Madison, MT               | -0.125               | 7.77                      | 17.26                 |
| 30059              | Meagher, MT               | -0.125               | 7.7                       | 4.65                  |
| 30061              | Mineral, MT               | 0.024                | 71.03                     | 56.21                 |
| 30063              | Missoula, MT              | -0.071               | 27.51                     | 17.8                  |
| 30065              | Musselshell, MT           | 0.192                | 94.56                     | 35.51                 |
| 30067              | Park, MT                  | -0.038               | 44.48                     | 6.88                  |
| 30069              | Petroleum, MT             | -0.021               | 52.88                     | 0.29                  |
| 30071              | Phillips, MT              | 0.069                | 82.04                     | 41.46                 |
| 30073              | Pondera, MT               | 0.022                | 70.3                      | 82.96                 |
| 30075              | Powder River, MT          | -0.14                | 5.16                      | 3.92                  |
| 30077              | Powell, MT                | 0.246                | 96.18                     | 25.45                 |
| 30079              | Prairie, MT               | -0.077               | 24.51                     | 7.58                  |
| 30081              | Ravalli, MT               | -0.057               | 34.26                     | 18.6                  |
| 30083              | Richland, MT              | 0.021                | 70.01                     | 21.21                 |

| <b>County FIPS</b> | <b>County Description</b> | <b>DOS-SVI Index</b> | <b>DOS-SVI Percentile</b> | <b>SVI Percentile</b> |
|--------------------|---------------------------|----------------------|---------------------------|-----------------------|
| 30085              | Roosevelt, MT             | 0.326                | 97.93                     | 88.79                 |
| 30087              | Rosebud, MT               | 0.166                | 93.06                     | 60.7                  |
| 30089              | Sanders, MT               | -0.036               | 45.69                     | 34.78                 |
| 30091              | Sheridan, MT              | 0.014                | 67.94                     | 9.49                  |
| 30093              | Silver Bow, MT            | -0.053               | 36.68                     | 52.58                 |
| 30095              | Stillwater, MT            | -0.015               | 55.65                     | 3.6                   |
| 30097              | Sweet Grass, MT           | -0.089               | 19.74                     | 0.86                  |
| 30099              | Teton, MT                 | 0.07                 | 82.33                     | 29.81                 |
| 30101              | Toole, MT                 | 0.017                | 68.93                     | 47.68                 |
| 30103              | Treasure, MT              | -0.147               | 4.36                      | 5.67                  |
| 30105              | Valley, MT                | -0.047               | 39.41                     | 11.62                 |
| 30107              | Wheatland, MT             | 0.042                | 76.06                     | 54.36                 |
| 30109              | Wibaux, MT                | -0.147               | 4.46                      | 39.33                 |
| 30111              | Yellowstone, MT           | -0.009               | 58.45                     | 24.97                 |
| 31001              | Adams, NE                 | -0.043               | 41.32                     | 35.92                 |
| 31003              | Antelope, NE              | -0.1                 | 15.12                     | 10.32                 |
| 31005              | Arthur, NE                | -0.132               | 6.56                      | 0.83                  |
| 31007              | Banner, NE                | -0.148               | 4.3                       | 0.41                  |
| 31009              | Blaine, NE                | 0.055                | 79.15                     | 9.08                  |
| 31011              | Boone, NE                 | -0.048               | 38.97                     | 2.83                  |
| 31013              | Box Butte, NE             | -0.088               | 20.31                     | 35.86                 |
| 31015              | Boyd, NE                  | -0.111               | 11.4                      | 9.2                   |
| 31017              | Brown, NE                 | -0.08                | 23.3                      | 12.52                 |
| 31019              | Buffalo, NE               | -0.074               | 25.88                     | 26.56                 |
| 31021              | Burt, NE                  | -0.015               | 55.75                     | 25.41                 |
| 31023              | Butler, NE                | -0.037               | 44.99                     | 11.72                 |
| 31025              | Cass, NE                  | -0.036               | 45.62                     | 1.08                  |
| 31027              | Cedar, NE                 | -0.091               | 19.13                     | 1.21                  |
| 31029              | Chase, NE                 | -0.147               | 4.52                      | 15.51                 |
| 31031              | Cherry, NE                | -0.125               | 7.83                      | 22.61                 |
| 31033              | Cheyenne, NE              | -0.016               | 55.52                     | 12.1                  |
| 31035              | Clay, NE                  | -0.095               | 17.35                     | 16.46                 |
| 31037              | Colfax, NE                | -0.073               | 26.17                     | 51.88                 |
| 31039              | Cuming, NE                | -0.089               | 19.48                     | 19.36                 |
| 31041              | Custer, NE                | -0.02                | 53.2                      | 18.18                 |
| 31043              | Dakota, NE                | 0.014                | 67.72                     | 86.15                 |
| 31045              | Dawes, NE                 | 0.056                | 79.43                     | 17.17                 |
| 31047              | Dawson, NE                | -0.085               | 21.55                     | 79.33                 |
| 31049              | Deuel, NE                 | -0.141               | 5                         | 16.5                  |
| 31051              | Dixon, NE                 | -0.059               | 33.24                     | 37.9                  |
| 31053              | Dodge, NE                 | -0.061               | 31.9                      | 56.91                 |
| 31055              | Douglas, NE               | -0.168               | 2.64                      | 46.69                 |
| 31057              | Dundy, NE                 | -0.173               | 2.39                      | 30.38                 |
| 31059              | Fillmore, NE              | -0.124               | 8.15                      | 6.18                  |
| 31061              | Franklin, NE              | -0.128               | 7.04                      | 7.68                  |
| 31063              | Frontier, NE              | -0.069               | 27.86                     | 9.94                  |
| 31065              | Furnas, NE                | -0.127               | 7.29                      | 18.25                 |
| 31067              | Gage, NE                  | -0.13                | 6.78                      | 11.05                 |
| 31069              | Garden, NE                | -0.109               | 12.19                     | 1.43                  |
| 31071              | Garfield, NE              | -0.106               | 12.99                     | 4.3                   |
| 31073              | Gosper, NE                | -0.068               | 28.43                     | 0.51                  |
| 31075              | Grant, NE                 | -0.022               | 52.34                     | 13.28                 |
| 31077              | Greeley, NE               | -0.069               | 27.92                     | 4.11                  |
| 31079              | Hall, NE                  | -0.072               | 26.77                     | 67.01                 |
| 31081              | Hamilton, NE              | -0.1                 | 15.31                     | 0.89                  |

| <b>County FIPS</b> | <b>County Description</b> | <b>DOS-SVI Index</b> | <b>DOS-SVI Percentile</b> | <b>SVI Percentile</b> |
|--------------------|---------------------------|----------------------|---------------------------|-----------------------|
| 31083              | Harlan, NE                | -0.149               | 4.11                      | 12.39                 |
| 31085              | Hayes, NE                 | -0.228               | 0.57                      | 4.36                  |
| 31087              | Hitchcock, NE             | -0.072               | 26.93                     | 19.43                 |
| 31089              | Holt, NE                  | -0.108               | 12.38                     | 9.81                  |
| 31091              | Hooker, NE                | -0.122               | 8.56                      | 14.68                 |
| 31093              | Howard, NE                | -0.114               | 10.38                     | 8.03                  |
| 31095              | Jefferson, NE             | -0.191               | 1.59                      | 21.85                 |
| 31097              | Johnson, NE               | 0.127                | 90.26                     | 57.77                 |
| 31099              | Kearney, NE               | -0.004               | 60.46                     | 9.39                  |
| 31101              | Keith, NE                 | -0.013               | 56.8                      | 22.68                 |
| 31103              | Keya Paha, NE             | -0.136               | 5.99                      | 0.1                   |
| 31105              | Kimball, NE               | -0.022               | 52.5                      | 56.11                 |
| 31107              | Knox, NE                  | 0.074                | 83.22                     | 32.77                 |
| 31109              | Lancaster, NE             | -0.138               | 5.63                      | 30.25                 |
| 31111              | Lincoln, NE               | -0.061               | 32.25                     | 36.75                 |
| 31113              | Logan, NE                 | -0.023               | 51.73                     | 10.73                 |
| 31115              | Loup, NE                  | -0.164               | 3.06                      | 0.45                  |
| 31117              | McPherson, NE             | 0.081                | 84.27                     | 8.38                  |
| 31119              | Madison, NE               | -0.092               | 18.53                     | 51.05                 |
| 31121              | Merrick, NE               | -0.014               | 56.16                     | 19.75                 |
| 31123              | Morrill, NE               | -0.072               | 26.74                     | 42.2                  |
| 31125              | Nance, NE                 | -0.12                | 8.95                      | 8.25                  |
| 31127              | Nemaha, NE                | -0.053               | 36.07                     | 16.59                 |
| 31129              | Nuckolls, NE              | -0.111               | 11.62                     | 17.36                 |
| 31131              | Otoe, NE                  | -0.102               | 14.39                     | 22.87                 |
| 31133              | Pawnee, NE                | 0.033                | 73.61                     | 23.18                 |
| 31135              | Perkins, NE               | -0.149               | 4.14                      | 5.38                  |
| 31137              | Phelps, NE                | -0.124               | 7.93                      | 12.26                 |
| 31139              | Pierce, NE                | -0.087               | 20.69                     | 2.29                  |
| 31141              | Platte, NE                | -0.064               | 30.72                     | 29.94                 |
| 31143              | Polk, NE                  | 0.042                | 76.09                     | 19.08                 |
| 31145              | Red Willow, NE            | -0.139               | 5.54                      | 23.73                 |
| 31147              | Richardson, NE            | -0.098               | 16.05                     | 10.25                 |
| 31149              | Rock, NE                  | -0.109               | 12.16                     | 0.92                  |
| 31151              | Saline, NE                | -0.044               | 40.78                     | 59.78                 |
| 31153              | Sarpy, NE                 | -0.12                | 9.01                      | 9.71                  |
| 31155              | Saunders, NE              | -0.097               | 16.59                     | 4.24                  |
| 31157              | Scotts Bluff, NE          | -0.091               | 19.07                     | 56.75                 |
| 31159              | Seward, NE                | -0.05                | 38.11                     | 4.68                  |
| 31161              | Sheridan, NE              | 0.042                | 76.15                     | 59.68                 |
| 31163              | Sherman, NE               | -0.1                 | 15.19                     | 7.39                  |
| 31165              | Sioux, NE                 | -0.055               | 35.05                     | 1.78                  |
| 31167              | Stanton, NE               | -0.095               | 17.38                     | 5.7                   |
| 31169              | Thayer, NE                | -0.089               | 19.83                     | 5.8                   |
| 31171              | Thomas, NE                | -0.209               | 1.05                      | 0.35                  |
| 31173              | Thurston, NE              | 0.682                | 99.55                     | 88.66                 |
| 31175              | Valley, NE                | -0.106               | 13.02                     | 14.84                 |
| 31177              | Washington, NE            | -0.122               | 8.44                      | 3.79                  |
| 31179              | Wayne, NE                 | 0.011                | 66.73                     | 8.47                  |
| 31181              | Webster, NE               | -0.077               | 24.67                     | 10.92                 |
| 31183              | Wheeler, NE               | -0.149               | 4.23                      | 0.48                  |
| 31185              | York, NE                  | -0.105               | 13.47                     | 18.28                 |
| 32001              | Churchill, NV             | 0.032                | 73.22                     | 60.48                 |
| 32003              | Clark, NV                 | -0.061               | 32                        | 74.04                 |
| 32005              | Douglas, NV               | -0.039               | 44.09                     | 17.93                 |

| <b>County FIPS</b> | <b>County Description</b> | <b>DOS-SVI Index</b> | <b>DOS-SVI Percentile</b> | <b>SVI Percentile</b> |
|--------------------|---------------------------|----------------------|---------------------------|-----------------------|
| 32007              | Elko, NV                  | 0.012                | 66.95                     | 51.78                 |
| 32009              | Esmeralda, NV             | -0.019               | 53.68                     | 63.95                 |
| 32011              | Eureka, NV                | -0.041               | 42.92                     | 6.75                  |
| 32013              | Humboldt, NV              | 0.072                | 82.55                     | 58.69                 |
| 32015              | Lander, NV                | 0.266                | 96.66                     | 82.61                 |
| 32017              | Lincoln, NV               | 0.028                | 71.98                     | 42.13                 |
| 32019              | Lyon, NV                  | 0.031                | 72.91                     | 57.83                 |
| 32021              | Mineral, NV               | 0.273                | 96.91                     | 88.15                 |
| 32023              | Nye, NV                   | 0.037                | 74.47                     | 73.09                 |
| 32027              | Pershing, NV              | 0.501                | 99.14                     | 90.38                 |
| 32029              | Storey, NV                | -0.157               | 3.6                       | 7.17                  |
| 32031              | Washoe, NV                | -0.004               | 60.59                     | 52.71                 |
| 32033              | White Pine, NV            | 0.144                | 91.56                     | 37.42                 |
| 32510              | Carson City, NV           | -0.039               | 44.06                     | 84.43                 |
| 33001              | Belknap, NH               | -0.055               | 35.44                     | 8.41                  |
| 33003              | Carroll, NH               | -0.041               | 42.79                     | 5.83                  |
| 33005              | Cheshire, NH              | -0.057               | 34.29                     | 14.17                 |
| 33007              | Coos, NH                  | -0.008               | 58.64                     | 52.9                  |
| 33009              | Grafton, NH               | -0.027               | 49.7                      | 18.82                 |
| 33011              | Hillsborough, NH          | -0.133               | 6.46                      | 19.11                 |
| 33013              | Merrimack, NH             | -0.078               | 24.04                     | 14.55                 |
| 33015              | Rockingham, NH            | -0.117               | 9.71                      | 1.11                  |
| 33017              | Strafford, NH             | -0.024               | 51.54                     | 17.48                 |
| 33019              | Sullivan, NH              | -0.098               | 16.14                     | 15.13                 |
| 34001              | Atlantic, NJ              | -0.028               | 49.6                      | 79.11                 |
| 34003              | Bergen, NJ                | -0.118               | 9.33                      | 23.95                 |
| 34005              | Burlington, NJ            | -0.045               | 40.15                     | 20.54                 |
| 34007              | Camden, NJ                | -0.09                | 19.26                     | 61.18                 |
| 34009              | Cape May, NJ              | 0.005                | 64.44                     | 33.98                 |
| 34011              | Cumberland, NJ            | 0.02                 | 69.79                     | 95.92                 |
| 34013              | Essex, NJ                 | 0.074                | 82.94                     | 84.04                 |
| 34015              | Gloucester, NJ            | -0.06                | 32.44                     | 16.75                 |
| 34017              | Hudson, NJ                | 0.123                | 89.62                     | 64.24                 |
| 34019              | Hunterdon, NJ             | -0.058               | 33.81                     | 2.64                  |
| 34021              | Mercer, NJ                | -0.073               | 26.3                      | 55.8                  |
| 34023              | Middlesex, NJ             | -0.008               | 58.68                     | 46.59                 |
| 34025              | Monmouth, NJ              | -0.099               | 15.63                     | 16.05                 |
| 34027              | Morris, NJ                | -0.116               | 9.87                      | 12.01                 |
| 34029              | Ocean, NJ                 | 0.026                | 71.54                     | 33.54                 |
| 34031              | Passaic, NJ               | 0.12                 | 89.14                     | 77.64                 |
| 34033              | Salem, NJ                 | -0.06                | 32.35                     | 59.01                 |
| 34035              | Somerset, NJ              | -0.097               | 16.62                     | 10                    |
| 34037              | Sussex, NJ                | -0.052               | 37.38                     | 1.91                  |
| 34039              | Union, NJ                 | -0.03                | 48.42                     | 62.32                 |
| 34041              | Warren, NJ                | -0.07                | 27.76                     | 21.78                 |
| 35001              | Bernalillo, NM            | -0.098               | 15.92                     | 68.28                 |
| 35003              | Catron, NM                | -0.238               | 0.48                      | 33.57                 |
| 35005              | Chaves, NM                | -0.068               | 28.3                      | 95.51                 |
| 35006              | Cibola, NM                | 0.47                 | 98.95                     | 99.84                 |
| 35007              | Colfax, NM                | 0.048                | 77.68                     | 96.27                 |
| 35009              | Curry, NM                 | -0.042               | 42.09                     | 87.74                 |
| 35011              | De Baca, NM               | -0.039               | 43.87                     | 69.39                 |
| 35013              | Doña Ana, NM              | -0.03                | 48.87                     | 98.41                 |
| 35015              | Eddy, NM                  | 0.052                | 78.42                     | 70.32                 |
| 35017              | Grant, NM                 | 0.069                | 81.98                     | 92.96                 |

| <b>County FIPS</b> | <b>County Description</b> | <b>DOS-SVI Index</b> | <b>DOS-SVI Percentile</b> | <b>SVI Percentile</b> |
|--------------------|---------------------------|----------------------|---------------------------|-----------------------|
| 35019              | Guadalupe, NM             | 0.062                | 80.67                     | 95.29                 |
| 35021              | Harding, NM               | -0.035               | 45.97                     | 36.15                 |
| 35023              | Hidalgo, NM               | -0.079               | 23.53                     | 96.31                 |
| 35025              | Lea, NM                   | 0.056                | 79.21                     | 92.17                 |
| 35027              | Lincoln, NM               | -0.062               | 31.77                     | 47.96                 |
| 35028              | Los Alamos, NM            | -0.104               | 13.85                     | 2.48                  |
| 35029              | Luna, NM                  | -0.153               | 3.76                      | 99.9                  |
| 35031              | McKinley, NM              | 0.704                | 99.59                     | 98.89                 |
| 35033              | Mora, NM                  | 0.073                | 82.74                     | 79.59                 |
| 35035              | Otero, NM                 | 0.008                | 65.71                     | 91.4                  |
| 35037              | Quay, NM                  | -0.147               | 4.42                      | 80.96                 |
| 35041              | Roosevelt, NM             | 0.056                | 79.37                     | 94.3                  |
| 35043              | Sandoval, NM              | 0.044                | 76.92                     | 48.18                 |
| 35045              | San Juan, NM              | 0.251                | 96.37                     | 91.94                 |
| 35047              | San Miguel, NM            | -0.109               | 11.91                     | 98.63                 |
| 35049              | Santa Fe, NM              | -0.071               | 27.44                     | 52.55                 |
| 35051              | Sierra, NM                | -0.089               | 20.02                     | 91.46                 |
| 35053              | Socorro, NM               | -0.093               | 18.08                     | 97.45                 |
| 35055              | Taos, NM                  | 0.006                | 64.66                     | 85.86                 |
| 35057              | Torrance, NM              | 0.037                | 74.66                     | 74.9                  |
| 35059              | Union, NM                 | -0.024               | 51.29                     | 67.93                 |
| 35061              | Valencia, NM              | 0.01                 | 66.35                     | 90.41                 |
| 36001              | Albany, NY                | 0                    | 62.11                     | 30.41                 |
| 36003              | Allegany, NY              | 0.102                | 86.95                     | 58.18                 |
| 36005              | Bronx, NY                 | 0.321                | 97.83                     | 99.27                 |
| 36007              | Broome, NY                | 0.022                | 70.2                      | 61.66                 |
| 36009              | Cattaraugus, NY           | 0.063                | 80.87                     | 72.83                 |
| 36011              | Cayuga, NY                | -0.008               | 58.74                     | 50.25                 |
| 36013              | Chautauqua, NY            | 0.029                | 72.27                     | 72.48                 |
| 36015              | Chemung, NY               | -0.005               | 60.14                     | 48.5                  |
| 36017              | Chenango, NY              | 0.021                | 69.91                     | 56.46                 |
| 36019              | Clinton, NY               | 0.016                | 68.48                     | 53.12                 |
| 36021              | Columbia, NY              | -0.023               | 51.7                      | 38.54                 |
| 36023              | Cortland, NY              | 0.015                | 68.26                     | 34.52                 |
| 36025              | Delaware, NY              | 0.07                 | 82.27                     | 63.31                 |
| 36027              | Dutchess, NY              | 0.114                | 88.41                     | 42.07                 |
| 36029              | Erie, NY                  | -0.01                | 57.78                     | 41.4                  |
| 36031              | Essex, NY                 | 0.076                | 83.41                     | 38.69                 |
| 36033              | Franklin, NY              | 0.129                | 90.39                     | 70.73                 |
| 36035              | Fulton, NY                | -0.044               | 40.75                     | 50.1                  |
| 36037              | Genesee, NY               | -0.057               | 33.88                     | 18.79                 |
| 36039              | Greene, NY                | 0.053                | 78.83                     | 41.59                 |
| 36041              | Hamilton, NY              | -0.059               | 33.11                     | 38.98                 |
| 36043              | Herkimer, NY              | 0.034                | 73.77                     | 53.22                 |
| 36045              | Jefferson, NY             | 0.057                | 79.66                     | 64.84                 |
| 36047              | Kings, NY                 | 0.566                | 99.2                      | 81.53                 |
| 36049              | Lewis, NY                 | -0.014               | 56.19                     | 29.11                 |
| 36051              | Livingston, NY            | 0.059                | 80.07                     | 34.24                 |
| 36053              | Madison, NY               | 0.017                | 69.15                     | 16.66                 |
| 36055              | Monroe, NY                | -0.056               | 34.89                     | 52.04                 |
| 36057              | Montgomery, NY            | 0.044                | 76.82                     | 83.06                 |
| 36059              | Nassau, NY                | -0.039               | 44.03                     | 24.3                  |
| 36061              | New York, NY              | 0.183                | 93.92                     | 55.1                  |
| 36063              | Niagara, NY               | -0.043               | 41.2                      | 33.18                 |
| 36065              | Oneida, NY                | 0.001                | 62.53                     | 69.46                 |



| <b>County FIPS</b> | <b>County Description</b> | <b>DOS-SVI Index</b> | <b>DOS-SVI Percentile</b> | <b>SVI Percentile</b> |
|--------------------|---------------------------|----------------------|---------------------------|-----------------------|
| 36067              | Onondaga, NY              | -0.029               | 49                        | 52.07                 |
| 36069              | Ontario, NY               | -0.052               | 37.03                     | 23.15                 |
| 36071              | Orange, NY                | 0.068                | 81.82                     | 55.38                 |
| 36073              | Orleans, NY               | 0.05                 | 78.22                     | 64.3                  |
| 36075              | Oswego, NY                | 0.067                | 81.57                     | 64.97                 |
| 36077              | Otsego, NY                | 0.125                | 90                        | 42.36                 |
| 36079              | Putnam, NY                | -0.019               | 53.77                     | 8.12                  |
| 36081              | Queens, NY                | 0.302                | 97.45                     | 62.01                 |
| 36083              | Rensselaer, NY            | -0.022               | 52.47                     | 34.3                  |
| 36085              | Richmond, NY              | 0.134                | 90.83                     | 47.64                 |
| 36087              | Rockland, NY              | 0.17                 | 93.35                     | 60.38                 |
| 36089              | St. Lawrence, NY          | 0.111                | 88.16                     | 74.75                 |
| 36091              | Saratoga, NY              | -0.096               | 17.03                     | 4.75                  |
| 36093              | Schenectady, NY           | -0.019               | 53.84                     | 39.43                 |
| 36095              | Schoharie, NY             | -0.039               | 43.84                     | 40.13                 |
| 36097              | Schuyler, NY              | 0.004                | 64.15                     | 36.91                 |
| 36099              | Seneca, NY                | -0.002               | 61.09                     | 44.9                  |
| 36101              | Steuben, NY               | -0.012               | 56.89                     | 46.91                 |
| 36103              | Suffolk, NY               | -0.005               | 59.98                     | 21.46                 |
| 36105              | Sullivan, NY              | 0.097                | 86.41                     | 79.39                 |
| 36107              | Tioga, NY                 | -0.024               | 51.51                     | 19.94                 |
| 36109              | Tompkins, NY              | 0.117                | 88.79                     | 34.62                 |
| 36111              | Ulster, NY                | 0.029                | 72.24                     | 47.04                 |
| 36113              | Warren, NY                | -0.034               | 46.39                     | 17.42                 |
| 36115              | Washington, NY            | 0.031                | 72.81                     | 40                    |
| 36117              | Wayne, NY                 | -0.03                | 48.71                     | 34.14                 |
| 36119              | Westchester, NY           | -0.052               | 37.5                      | 55.16                 |
| 36121              | Wyoming, NY               | 0.028                | 71.92                     | 31.21                 |
| 36123              | Yates, NY                 | 0.136                | 90.93                     | 43.92                 |
| 37001              | Alamance, NC              | -0.074               | 25.72                     | 78.38                 |
| 37003              | Alexander, NC             | 0.034                | 73.93                     | 63.41                 |
| 37005              | Alleghany, NC             | -0.195               | 1.4                       | 62.68                 |
| 37007              | Anson, NC                 | 0.183                | 93.98                     | 94.43                 |
| 37009              | Ashe, NC                  | -0.118               | 9.49                      | 49.94                 |
| 37011              | Avery, NC                 | 0.013                | 67.49                     | 64.46                 |
| 37013              | Beaufort, NC              | -0.024               | 51.07                     | 71.56                 |
| 37015              | Bertie, NC                | 0.162                | 92.74                     | 93.85                 |
| 37017              | Bladen, NC                | 0.02                 | 69.56                     | 94.46                 |
| 37019              | Brunswick, NC             | -0.047               | 39.19                     | 35.83                 |
| 37021              | Buncombe, NC              | -0.007               | 59.25                     | 37.99                 |
| 37023              | Burke, NC                 | 0.052                | 78.57                     | 84.87                 |
| 37025              | Cabarrus, NC              | 0.065                | 81.22                     | 41.75                 |
| 37027              | Caldwell, NC              | -0.078               | 24.13                     | 65.1                  |
| 37029              | Camden, NC                | -0.074               | 25.98                     | 30.7                  |
| 37031              | Carteret, NC              | -0.126               | 7.58                      | 42.55                 |
| 37033              | Caswell, NC               | 0.051                | 78.38                     | 83.6                  |
| 37035              | Catawba, NC               | -0.005               | 60.01                     | 64.81                 |
| 37037              | Chatham, NC               | -0.074               | 25.79                     | 38.09                 |
| 37039              | Cherokee, NC              | -0.009               | 58.26                     | 48.69                 |
| 37041              | Chowan, NC                | 0.08                 | 84.18                     | 81.18                 |
| 37043              | Clay, NC                  | -0.109               | 12.32                     | 21.91                 |
| 37045              | Cleveland, NC             | 0.033                | 73.38                     | 83.5                  |
| 37047              | Columbus, NC              | 0.043                | 76.41                     | 94.81                 |
| 37049              | Craven, NC                | 0.039                | 75.26                     | 80.99                 |
| 37051              | Cumberland, NC            | -0.031               | 47.88                     | 86.4                  |

| <b>County FIPS</b> | <b>County Description</b> | <b>DOS-SVI Index</b> | <b>DOS-SVI Percentile</b> | <b>SVI Percentile</b> |
|--------------------|---------------------------|----------------------|---------------------------|-----------------------|
| 37053              | Currituck, NC             | -0.033               | 46.55                     | 11.94                 |
| 37055              | Dare, NC                  | -0.013               | 56.67                     | 14.49                 |
| 37057              | Davidson, NC              | -0.02                | 53.17                     | 68.41                 |
| 37059              | Davie, NC                 | -0.043               | 41.29                     | 44.11                 |
| 37061              | Duplin, NC                | 0.039                | 75.49                     | 97.9                  |
| 37063              | Durham, NC                | -0.134               | 6.27                      | 61.97                 |
| 37065              | Edgecombe, NC             | 0.085                | 84.88                     | 97.26                 |
| 37067              | Forsyth, NC               | -0.085               | 21.36                     | 68.34                 |
| 37069              | Franklin, NC              | 0                    | 62.05                     | 63.76                 |
| 37071              | Gaston, NC                | -0.017               | 54.57                     | 67.2                  |
| 37073              | Gates, NC                 | -0.012               | 56.92                     | 35.67                 |
| 37075              | Graham, NC                | -0.076               | 24.71                     | 63.38                 |
| 37077              | Granville, NC             | -0.026               | 50.17                     | 65.61                 |
| 37079              | Greene, NC                | 0.094                | 85.86                     | 99.24                 |
| 37081              | Guilford, NC              | -0.088               | 20.18                     | 63.69                 |
| 37083              | Halifax, NC               | 0.002                | 63.07                     | 96.46                 |
| 37085              | Harnett, NC               | 0.054                | 78.99                     | 78.69                 |
| 37087              | Haywood, NC               | -0.075               | 25.66                     | 28.09                 |
| 37089              | Henderson, NC             | -0.052               | 36.84                     | 32.1                  |
| 37091              | Hertford, NC              | 0.122                | 89.4                      | 98.73                 |
| 37093              | Hoke, NC                  | 0.025                | 71.22                     | 89.24                 |
| 37095              | Hyde, NC                  | 0.183                | 93.95                     | 86.27                 |
| 37097              | Iredell, NC               | -0.026               | 50.3                      | 37.45                 |
| 37099              | Jackson, NC               | 0.031                | 72.62                     | 62.36                 |
| 37101              | Johnston, NC              | -0.052               | 36.93                     | 53.95                 |
| 37103              | Jones, NC                 | 0.003                | 63.48                     | 87.61                 |
| 37105              | Lee, NC                   | -0.028               | 49.51                     | 84.81                 |
| 37107              | Lenoir, NC                | 0.068                | 81.73                     | 99.33                 |
| 37109              | Lincoln, NC               | -0.04                | 43.39                     | 35.64                 |
| 37111              | McDowell, NC              | 0.001                | 62.72                     | 78.95                 |
| 37113              | Macon, NC                 | -0.036               | 45.3                      | 35.48                 |
| 37115              | Madison, NC               | 0.01                 | 66.57                     | 45.86                 |
| 37117              | Martin, NC                | -0.019               | 53.52                     | 75.41                 |
| 37119              | Mecklenburg, NC           | -0.198               | 1.27                      | 44.08                 |
| 37121              | Mitchell, NC              | -0.113               | 11.14                     | 42.23                 |
| 37123              | Montgomery, NC            | 0.08                 | 84.02                     | 87.13                 |
| 37125              | Moore, NC                 | -0.042               | 41.83                     | 36.21                 |
| 37127              | Nash, NC                  | 0.05                 | 78.1                      | 82.87                 |
| 37129              | New Hanover, NC           | -0.13                | 6.91                      | 37.71                 |
| 37131              | Northampton, NC           | -0.026               | 49.92                     | 90.22                 |
| 37133              | Onslow, NC                | 0.072                | 82.65                     | 74.65                 |
| 37135              | Orange, NC                | -0.058               | 33.37                     | 29.59                 |
| 37137              | Pamlico, NC               | 0.119                | 89.02                     | 71.62                 |
| 37139              | Pasquotank, NC            | 0.032                | 73.13                     | 77.48                 |
| 37141              | Pender, NC                | 0.01                 | 66.12                     | 54.78                 |
| 37143              | Perquimans, NC            | -0.011               | 57.72                     | 50.48                 |
| 37145              | Person, NC                | 0.08                 | 84.05                     | 77.32                 |
| 37147              | Pitt, NC                  | -0.032               | 47.37                     | 82.42                 |
| 37149              | Polk, NC                  | 0.012                | 66.98                     | 38.25                 |
| 37151              | Randolph, NC              | -0.075               | 25.47                     | 69.65                 |
| 37153              | Richmond, NC              | 0.058                | 79.91                     | 97.96                 |
| 37155              | Robeson, NC               | 0.104                | 87.3                      | 99.11                 |
| 37157              | Rockingham, NC            | -0.013               | 56.57                     | 78.57                 |
| 37159              | Rowan, NC                 | 0                    | 62.15                     | 81.43                 |
| 37161              | Rutherford, NC            | -0.027               | 49.86                     | 75.51                 |

| <b>County FIPS</b> | <b>County Description</b> | <b>DOS-SVI Index</b> | <b>DOS-SVI Percentile</b> | <b>SVI Percentile</b> |
|--------------------|---------------------------|----------------------|---------------------------|-----------------------|
| 37163              | Sampson, NC               | 0.03                 | 72.36                     | 97.23                 |
| 37165              | Scotland, NC              | 0.264                | 96.59                     | 99.36                 |
| 37167              | Stanly, NC                | 0.073                | 82.68                     | 63.25                 |
| 37169              | Stokes, NC                | -0.059               | 32.98                     | 30.67                 |
| 37171              | Surry, NC                 | -0.075               | 25.44                     | 72.58                 |
| 37173              | Swain, NC                 | 0.02                 | 69.53                     | 77.74                 |
| 37175              | Transylvania, NC          | -0.003               | 60.81                     | 39.75                 |
| 37177              | Tyrrell, NC               | 0.096                | 86.28                     | 87.64                 |
| 37179              | Union, NC                 | 0.017                | 69.05                     | 18.73                 |
| 37181              | Vance, NC                 | 0.121                | 89.3                      | 97.87                 |
| 37183              | Wake, NC                  | -0.134               | 6.4                       | 27.74                 |
| 37185              | Warren, NC                | 0.052                | 78.48                     | 89.43                 |
| 37187              | Washington, NC            | -0.042               | 41.87                     | 87.87                 |
| 37189              | Watauga, NC               | -0.021               | 52.72                     | 41.21                 |
| 37191              | Wayne, NC                 | -0.003               | 60.74                     | 95.03                 |
| 37193              | Wilkes, NC                | -0.096               | 17.16                     | 69.24                 |
| 37195              | Wilson, NC                | 0.059                | 80.01                     | 93.6                  |
| 37197              | Yadkin, NC                | -0.046               | 40.02                     | 64.04                 |
| 37199              | Yancey, NC                | -0.064               | 30.37                     | 57.36                 |
| 38001              | Adams, ND                 | -0.097               | 16.81                     | 2.99                  |
| 38003              | Barnes, ND                | -0.126               | 7.39                      | 12.45                 |
| 38005              | Benson, ND                | 0.327                | 98.03                     | 84.33                 |
| 38007              | Billings, ND              | -0.098               | 15.95                     | 3.12                  |
| 38009              | Bottineau, ND             | -0.056               | 34.61                     | 6.91                  |
| 38011              | Bowman, ND                | 0.002                | 62.85                     | 17.55                 |
| 38013              | Burke, ND                 | 0.057                | 79.47                     | 0.7                   |
| 38015              | Burleigh, ND              | -0.142               | 4.87                      | 17.39                 |
| 38017              | Cass, ND                  | -0.35                | 0.16                      | 14.27                 |
| 38019              | Cavalier, ND              | -0.072               | 26.71                     | 1.72                  |
| 38021              | Dickey, ND                | 0.01                 | 66.41                     | 11.59                 |
| 38023              | Divide, ND                | -0.153               | 3.73                      | 3.34                  |
| 38025              | Dunn, ND                  | 0.016                | 68.67                     | 22.26                 |
| 38027              | Eddy, ND                  | -0.217               | 0.73                      | 29.04                 |
| 38029              | Emmons, ND                | -0.167               | 2.74                      | 9.55                  |
| 38031              | Foster, ND                | -0.054               | 35.59                     | 1.75                  |
| 38033              | Golden Valley, ND         | -0.05                | 38.36                     | 9.3                   |
| 38035              | Grand Forks, ND           | -0.222               | 0.64                      | 30.29                 |
| 38037              | Grant, ND                 | -0.037               | 45.18                     | 7.1                   |
| 38039              | Griggs, ND                | -0.167               | 2.77                      | 7.32                  |
| 38041              | Hettinger, ND             | -0.118               | 9.46                      | 5.61                  |
| 38043              | Kidder, ND                | -0.035               | 46.23                     | 2.9                   |
| 38045              | LaMoure, ND               | -0.162               | 3.15                      | 4.43                  |
| 38047              | Logan, ND                 | -0.037               | 45.21                     | 3.82                  |
| 38049              | McHenry, ND               | -0.124               | 7.96                      | 2.96                  |
| 38051              | McIntosh, ND              | -0.179               | 2.07                      | 10.61                 |
| 38053              | McKenzie, ND              | 0.105                | 87.58                     | 39.2                  |
| 38055              | McLean, ND                | -0.047               | 39.6                      | 8.34                  |
| 38057              | Mercer, ND                | -0.087               | 20.73                     | 10.16                 |
| 38059              | Morton, ND                | -0.081               | 22.89                     | 10.35                 |
| 38061              | Mountrail, ND             | 0.167                | 93.12                     | 37.58                 |
| 38063              | Nelson, ND                | -0.079               | 23.37                     | 3.5                   |
| 38065              | Oliver, ND                | -0.063               | 30.91                     | 21.08                 |
| 38067              | Pembina, ND               | -0.082               | 22.54                     | 4.17                  |
| 38069              | Pierce, ND                | -0.144               | 4.74                      | 19.14                 |
| 38071              | Ramsey, ND                | -0.12                | 8.91                      | 35.32                 |

| <b>County FIPS</b> | <b>County Description</b> | <b>DOS-SVI Index</b> | <b>DOS-SVI Percentile</b> | <b>SVI Percentile</b> |
|--------------------|---------------------------|----------------------|---------------------------|-----------------------|
| 38073              | Ransom, ND                | -0.194               | 1.5                       | 8.57                  |
| 38075              | Renville, ND              | -0.042               | 42.25                     | 2.8                   |
| 38077              | Richland, ND              | -0.134               | 6.3                       | 12.17                 |
| 38079              | Rolette, ND               | 0.191                | 94.49                     | 90.7                  |
| 38081              | Sargent, ND               | -0.11                | 11.72                     | 2.32                  |
| 38083              | Sheridan, ND              | -0.16                | 3.34                      | 7.42                  |
| 38085              | Sioux, ND                 | 0.68                 | 99.49                     | 88.44                 |
| 38087              | Slope, ND                 | -0.179               | 2.04                      | 1.37                  |
| 38089              | Stark, ND                 | -0.095               | 17.19                     | 21.4                  |
| 38091              | Steele, ND                | -0.065               | 29.7                      | 0.19                  |
| 38093              | Stutsman, ND              | -0.078               | 23.81                     | 24.24                 |
| 38095              | Towner, ND                | 0.055                | 79.08                     | 19.46                 |
| 38097              | Traill, ND                | -0.099               | 15.47                     | 9.27                  |
| 38099              | Walsh, ND                 | -0.094               | 17.57                     | 36.82                 |
| 38101              | Ward, ND                  | -0.114               | 10.76                     | 16.78                 |
| 38103              | Wells, ND                 | -0.12                | 9.07                      | 6.11                  |
| 38105              | Williams, ND              | -0.222               | 0.67                      | 25.1                  |
| 39001              | Adams, OH                 | -0.025               | 50.84                     | 77.04                 |
| 39003              | Allen, OH                 | -0.042               | 42.02                     | 57.93                 |
| 39005              | Ashland, OH               | 0.001                | 62.46                     | 43.34                 |
| 39007              | Ashtabula, OH             | 0.011                | 66.67                     | 78.57                 |
| 39009              | Athens, OH                | 0.074                | 83.16                     | 73.25                 |
| 39011              | Auglaize, OH              | -0.054               | 36.01                     | 5.35                  |
| 39013              | Belmont, OH               | -0.036               | 45.34                     | 35.96                 |
| 39015              | Brown, OH                 | -0.03                | 48.62                     | 40.48                 |
| 39017              | Butler, OH                | -0.089               | 19.64                     | 36.18                 |
| 39019              | Carroll, OH               | -0.045               | 40.27                     | 15.38                 |
| 39021              | Champaign, OH             | -0.034               | 46.32                     | 29.78                 |
| 39023              | Clark, OH                 | -0.051               | 37.6                      | 72.71                 |
| 39025              | Clermont, OH              | -0.145               | 4.71                      | 10.29                 |
| 39027              | Clinton, OH               | -0.022               | 52.28                     | 44.24                 |
| 39029              | Columbiana, OH            | 0.015                | 68.45                     | 48.54                 |
| 39031              | Coshocton, OH             | 0.072                | 82.58                     | 62.07                 |
| 39033              | Crawford, OH              | -0.103               | 14.26                     | 31.91                 |
| 39035              | Cuyahoga, OH              | -0.107               | 12.89                     | 68.09                 |
| 39037              | Darke, OH                 | -0.039               | 44.16                     | 13.47                 |
| 39039              | Defiance, OH              | -0.063               | 31.17                     | 21.66                 |
| 39041              | Delaware, OH              | -0.079               | 23.46                     | 1.66                  |
| 39043              | Erie, OH                  | -0.118               | 9.55                      | 29.14                 |
| 39045              | Fairfield, OH             | -0.038               | 44.22                     | 23.54                 |
| 39047              | Fayette, OH               | -0.1                 | 15.15                     | 50.16                 |
| 39049              | Franklin, OH              | -0.107               | 12.67                     | 51.24                 |
| 39051              | Fulton, OH                | -0.033               | 46.77                     | 17.77                 |
| 39053              | Gallia, OH                | -0.035               | 45.91                     | 66.4                  |
| 39055              | Geauga, OH                | 0.067                | 81.5                      | 9.01                  |
| 39057              | Greene, OH                | -0.066               | 29.35                     | 20.76                 |
| 39059              | Guernsey, OH              | -0.04                | 43.55                     | 67.07                 |
| 39061              | Hamilton, OH              | -0.082               | 22.7                      | 53.69                 |
| 39063              | Hancock, OH               | -0.076               | 24.93                     | 21.11                 |
| 39065              | Hardin, OH                | 0.04                 | 75.74                     | 47.1                  |
| 39067              | Harrison, OH              | -0.01                | 58.07                     | 51.94                 |
| 39069              | Henry, OH                 | -0.099               | 15.73                     | 15.57                 |
| 39071              | Highland, OH              | -0.042               | 41.99                     | 68.98                 |
| 39073              | Hocking, OH               | 0.013                | 67.46                     | 46.85                 |
| 39075              | Holmes, OH                | 0.326                | 97.96                     | 43.6                  |

| <b>County FIPS</b> | <b>County Description</b> | <b>DOS-SVI Index</b> | <b>DOS-SVI Percentile</b> | <b>SVI Percentile</b> |
|--------------------|---------------------------|----------------------|---------------------------|-----------------------|
| 39077              | Huron, OH                 | -0.054               | 35.98                     | 43.25                 |
| 39079              | Jackson, OH               | 0.041                | 75.8                      | 77.26                 |
| 39081              | Jefferson, OH             | -0.046               | 39.73                     | 54.94                 |
| 39083              | Knox, OH                  | 0.038                | 74.91                     | 29.43                 |
| 39085              | Lake, OH                  | -0.165               | 2.99                      | 12.93                 |
| 39087              | Lawrence, OH              | -0.088               | 20.5                      | 55.83                 |
| 39089              | Licking, OH               | -0.044               | 41.13                     | 22.9                  |
| 39091              | Logan, OH                 | 0.01                 | 66.19                     | 31.69                 |
| 39093              | Lorain, OH                | -0.097               | 16.94                     | 50.89                 |
| 39095              | Lucas, OH                 | -0.099               | 15.35                     | 68.76                 |
| 39097              | Madison, OH               | 0.039                | 75.42                     | 33.82                 |
| 39099              | Mahoning, OH              | -0.069               | 27.83                     | 58.89                 |
| 39101              | Marion, OH                | 0.029                | 72.3                      | 64.14                 |
| 39103              | Medina, OH                | -0.084               | 21.78                     | 1.02                  |
| 39105              | Meigs, OH                 | -0.009               | 58.58                     | 67.87                 |
| 39107              | Mercer, OH                | -0.061               | 31.96                     | 5.1                   |
| 39109              | Miami, OH                 | -0.099               | 15.7                      | 11.91                 |
| 39111              | Monroe, OH                | -0.064               | 30.18                     | 44.3                  |
| 39113              | Montgomery, OH            | -0.045               | 40.37                     | 67.26                 |
| 39115              | Morgan, OH                | -0.082               | 22.38                     | 56.59                 |
| 39117              | Morrow, OH                | 0.012                | 67.14                     | 19.2                  |
| 39119              | Muskingum, OH             | -0.046               | 39.8                      | 59.81                 |
| 39121              | Noble, OH                 | 0.084                | 84.72                     | 42.93                 |
| 39123              | Ottawa, OH                | -0.111               | 11.46                     | 15.41                 |
| 39125              | Paulding, OH              | -0.018               | 54.51                     | 28.85                 |
| 39127              | Perry, OH                 | -0.053               | 36.29                     | 55.45                 |
| 39129              | Pickaway, OH              | 0.007                | 65.33                     | 28.18                 |
| 39131              | Pike, OH                  | -0.015               | 55.68                     | 79.94                 |
| 39133              | Portage, OH               | -0.088               | 20.28                     | 24.55                 |
| 39135              | Preble, OH                | -0.053               | 36.48                     | 16.91                 |
| 39137              | Putnam, OH                | -0.054               | 35.69                     | 1.53                  |
| 39139              | Richland, OH              | 0.017                | 68.8                      | 61.69                 |
| 39141              | Ross, OH                  | 0.02                 | 69.82                     | 72.55                 |
| 39143              | Sandusky, OH              | -0.092               | 18.59                     | 39.87                 |
| 39145              | Scioto, OH                | -0.007               | 59.31                     | 83.47                 |
| 39147              | Seneca, OH                | -0.061               | 32.03                     | 37.55                 |
| 39149              | Shelby, OH                | -0.04                | 43.43                     | 18.92                 |
| 39151              | Stark, OH                 | -0.059               | 32.92                     | 36.66                 |
| 39153              | Summit, OH                | -0.098               | 16.24                     | 33.34                 |
| 39155              | Trumbull, OH              | -0.089               | 19.58                     | 46.4                  |
| 39157              | Tuscarawas, OH            | -0.052               | 37.34                     | 34.43                 |
| 39159              | Union, OH                 | -0.014               | 56.1                      | 7.71                  |
| 39161              | Van Wert, OH              | -0.102               | 14.36                     | 16.97                 |
| 39163              | Vinton, OH                | 0.015                | 68.35                     | 72.29                 |
| 39165              | Warren, OH                | -0.082               | 22.73                     | 4.78                  |
| 39167              | Washington, OH            | -0.089               | 19.61                     | 34.97                 |
| 39169              | Wayne, OH                 | 0.053                | 78.73                     | 47.9                  |
| 39171              | Williams, OH              | -0.043               | 41.48                     | 26.91                 |
| 39173              | Wood, OH                  | -0.105               | 13.53                     | 16.62                 |
| 39175              | Wyandot, OH               | -0.089               | 20.06                     | 22.74                 |
| 40001              | Adair, OK                 | 0.12                 | 89.11                     | 89.65                 |
| 40003              | Alfalfa, OK               | 0.104                | 87.2                      | 25.35                 |
| 40005              | Atoka, OK                 | 0.065                | 81.12                     | 80.76                 |
| 40007              | Beaver, OK                | -0.047               | 39.38                     | 45.54                 |
| 40009              | Beckham, OK               | 0.1                  | 86.69                     | 71.18                 |

| <b>County FIPS</b> | <b>County Description</b> | <b>DOS-SVI Index</b> | <b>DOS-SVI Percentile</b> | <b>SVI Percentile</b> |
|--------------------|---------------------------|----------------------|---------------------------|-----------------------|
| 40011              | Blaine, OK                | 0.044                | 76.86                     | 66.78                 |
| 40013              | Bryan, OK                 | 0.035                | 74.05                     | 81.27                 |
| 40015              | Caddo, OK                 | 0.093                | 85.74                     | 94.59                 |
| 40017              | Canadian, OK              | -0.019               | 53.8                      | 26.21                 |
| 40019              | Carter, OK                | 0.004                | 64.22                     | 79.14                 |
| 40021              | Cherokee, OK              | 0.096                | 86.25                     | 92.71                 |
| 40023              | Choctaw, OK               | 0.022                | 70.39                     | 96.02                 |
| 40025              | Cimarron, OK              | -0.095               | 17.51                     | 44.75                 |
| 40027              | Cleveland, OK             | -0.057               | 34.32                     | 34.36                 |
| 40029              | Coal, OK                  | 0.006                | 64.63                     | 82.55                 |
| 40031              | Comanche, OK              | 0.058                | 79.72                     | 83.54                 |
| 40033              | Cotton, OK                | 0.073                | 82.81                     | 67.42                 |
| 40035              | Craig, OK                 | -0.002               | 60.97                     | 85.38                 |
| 40037              | Creek, OK                 | 0.025                | 71.31                     | 49.01                 |
| 40039              | Custer, OK                | 0.046                | 77.49                     | 75.03                 |
| 40041              | Delaware, OK              | 0                    | 61.95                     | 76.97                 |
| 40043              | Dewey, OK                 | -0.102               | 14.45                     | 22.48                 |
| 40045              | Ellis, OK                 | -0.092               | 18.56                     | 30.19                 |
| 40047              | Garfield, OK              | -0.074               | 25.82                     | 59.08                 |
| 40049              | Garvin, OK                | -0.043               | 41.58                     | 51.15                 |
| 40051              | Grady, OK                 | -0.036               | 45.59                     | 30.8                  |
| 40053              | Grant, OK                 | -0.141               | 4.97                      | 16.34                 |
| 40055              | Greer, OK                 | 0.041                | 75.96                     | 77.42                 |
| 40057              | Harmon, OK                | -0.036               | 45.37                     | 81.08                 |
| 40059              | Harper, OK                | -0.104               | 13.95                     | 31.85                 |
| 40061              | Haskell, OK               | 0.101                | 86.85                     | 87.36                 |
| 40063              | Hughes, OK                | 0.086                | 85.1                      | 81.15                 |
| 40065              | Jackson, OK               | -0.06                | 32.89                     | 82.26                 |
| 40067              | Jefferson, OK             | -0.045               | 40.47                     | 87.45                 |
| 40069              | Johnston, OK              | 0.028                | 72.02                     | 84.68                 |
| 40071              | Kay, OK                   | 0.005                | 64.47                     | 84.2                  |
| 40073              | Kingfisher, OK            | -0.043               | 41.55                     | 38.06                 |
| 40075              | Kiowa, OK                 | -0.126               | 7.54                      | 65.45                 |
| 40077              | Latimer, OK               | 0.101                | 86.82                     | 89.36                 |
| 40079              | Le Flore, OK              | -0.061               | 31.84                     | 90.32                 |
| 40081              | Lincoln, OK               | 0.014                | 67.75                     | 47.87                 |
| 40083              | Logan, OK                 | 0.027                | 71.86                     | 29.84                 |
| 40085              | Love, OK                  | -0.068               | 28.53                     | 62.93                 |
| 40087              | McClain, OK               | -0.064               | 30.82                     | 16.24                 |
| 40089              | McCurtain, OK             | 0.132                | 90.61                     | 91.37                 |
| 40091              | McIntosh, OK              | 0.152                | 92.04                     | 78.28                 |
| 40093              | Major, OK                 | -0.063               | 31.26                     | 32.04                 |
| 40095              | Marshall, OK              | -0.087               | 20.85                     | 85.45                 |
| 40097              | Mayes, OK                 | 0.048                | 77.75                     | 75.19                 |
| 40099              | Murray, OK                | -0.034               | 46.35                     | 70.92                 |
| 40101              | Muskogee, OK              | 0.001                | 62.78                     | 93.38                 |
| 40103              | Noble, OK                 | 0.023                | 70.68                     | 33.85                 |
| 40105              | Nowata, OK                | -0.009               | 58.42                     | 58.95                 |
| 40107              | Okfuskee, OK              | 0.236                | 95.83                     | 92.87                 |
| 40109              | Oklahoma, OK              | -0.105               | 13.44                     | 68.18                 |
| 40111              | Okmulgee, OK              | 0.061                | 80.52                     | 86.59                 |
| 40113              | Osage, OK                 | 0.069                | 82.17                     | 62.39                 |
| 40115              | Ottawa, OK                | 0.037                | 74.56                     | 95.76                 |
| 40117              | Pawnee, OK                | 0.072                | 82.62                     | 54.24                 |
| 40119              | Payne, OK                 | 0.045                | 77.17                     | 51.31                 |

| <b>County FIPS</b> | <b>County Description</b> | <b>DOS-SVI Index</b> | <b>DOS-SVI Percentile</b> | <b>SVI Percentile</b> |
|--------------------|---------------------------|----------------------|---------------------------|-----------------------|
| 40121              | Pittsburg, OK             | 0.022                | 70.45                     | 82.64                 |
| 40123              | Pontotoc, OK              | 0                    | 61.89                     | 65                    |
| 40125              | Pottawatomie, OK          | 0.032                | 73.35                     | 78.15                 |
| 40127              | Pushmataha, OK            | 0.075                | 83.25                     | 78.63                 |
| 40129              | Roger Mills, OK           | -0.026               | 50.21                     | 40.03                 |
| 40131              | Rogers, OK                | 0.007                | 64.98                     | 28.34                 |
| 40133              | Seminole, OK              | 0.069                | 82.2                      | 92.9                  |
| 40135              | Sequoyah, OK              | 0.096                | 86.22                     | 91.59                 |
| 40137              | Stephens, OK              | -0.076               | 24.77                     | 60.51                 |
| 40139              | Texas, OK                 | -0.062               | 31.39                     | 82.1                  |
| 40141              | Tillman, OK               | -0.017               | 54.76                     | 87.1                  |
| 40143              | Tulsa, OK                 | -0.116               | 10                        | 61.59                 |
| 40145              | Wagoner, OK               | 0.017                | 68.89                     | 42.45                 |
| 40147              | Washington, OK            | -0.066               | 29.2                      | 43.82                 |
| 40149              | Washita, OK               | 0.01                 | 66.16                     | 40.45                 |
| 40151              | Woods, OK                 | -0.116               | 9.9                       | 31.4                  |
| 40153              | Woodward, OK              | -0.053               | 36.2                      | 57.45                 |
| 41001              | Baker, OR                 | 0.075                | 83.29                     | 68.54                 |
| 41003              | Benton, OR                | -0.012               | 56.99                     | 34.9                  |
| 41005              | Clackamas, OR             | -0.058               | 33.84                     | 18.95                 |
| 41007              | Clatsop, OR               | -0.025               | 50.46                     | 51.85                 |
| 41009              | Columbia, OR              | -0.019               | 53.58                     | 40.25                 |
| 41011              | Coos, OR                  | 0.034                | 73.86                     | 74.3                  |
| 41013              | Crook, OR                 | 0.066                | 81.44                     | 57.29                 |
| 41015              | Curry, OR                 | -0.066               | 29.48                     | 48.79                 |
| 41017              | Deschutes, OR             | -0.025               | 50.56                     | 16.37                 |
| 41019              | Douglas, OR               | 0.038                | 74.72                     | 72.77                 |
| 41021              | Gilliam, OR               | -0.004               | 60.49                     | 50.92                 |
| 41023              | Grant, OR                 | 0.025                | 71.19                     | 54.65                 |
| 41025              | Harney, OR                | 0.136                | 90.89                     | 71.08                 |
| 41027              | Hood River, OR            | 0.016                | 68.64                     | 54.55                 |
| 41029              | Jackson, OR               | 0.018                | 69.18                     | 73.54                 |
| 41031              | Jefferson, OR             | 0.157                | 92.39                     | 91.18                 |
| 41033              | Josephine, OR             | 0.136                | 90.99                     | 65.57                 |
| 41035              | Klamath, OR               | 0.047                | 77.62                     | 86.88                 |
| 41037              | Lake, OR                  | 0.111                | 88.19                     | 76.08                 |
| 41039              | Lane, OR                  | -0.037               | 44.73                     | 64.9                  |
| 41041              | Lincoln, OR               | -0.037               | 45.15                     | 55.22                 |
| 41043              | Linn, OR                  | 0.008                | 65.55                     | 67.9                  |
| 41045              | Malheur, OR               | 0.21                 | 95.32                     | 99.65                 |
| 41047              | Marion, OR                | 0.02                 | 69.6                      | 85.35                 |
| 41049              | Morrow, OR                | 0.169                | 93.25                     | 76.43                 |
| 41051              | Multnomah, OR             | -0.08                | 23.18                     | 46.75                 |
| 41053              | Polk, OR                  | -0.059               | 33.05                     | 57.77                 |
| 41055              | Sherman, OR               | -0.163               | 3.09                      | 13.5                  |
| 41057              | Tillamook, OR             | 0.032                | 73.19                     | 65.86                 |
| 41059              | Umatilla, OR              | 0.17                 | 93.38                     | 96.88                 |
| 41061              | Union, OR                 | 0.053                | 78.67                     | 67.29                 |
| 41063              | Wallowa, OR               | 0.019                | 69.34                     | 50.32                 |
| 41065              | Wasco, OR                 | -0.021               | 52.69                     | 83.89                 |
| 41067              | Washington, OR            | -0.071               | 27.35                     | 31.94                 |
| 41069              | Wheeler, OR               | -0.086               | 20.98                     | 39.01                 |
| 41071              | Yamhill, OR               | 0.04                 | 75.77                     | 66.08                 |
| 42001              | Adams, PA                 | -0.027               | 49.79                     | 21.18                 |
| 42003              | Allegheny, PA             | -0.037               | 44.95                     | 25.06                 |

| <b>County FIPS</b> | <b>County Description</b> | <b>DOS-SVI Index</b> | <b>DOS-SVI Percentile</b> | <b>SVI Percentile</b> |
|--------------------|---------------------------|----------------------|---------------------------|-----------------------|
| 42005              | Armstrong, PA             | -0.055               | 35.12                     | 24.75                 |
| 42007              | Beaver, PA                | -0.04                | 43.65                     | 24.81                 |
| 42009              | Bedford, PA               | -0.042               | 41.64                     | 27.29                 |
| 42011              | Berks, PA                 | -0.066               | 29.39                     | 61.62                 |
| 42013              | Blair, PA                 | -0.066               | 29.42                     | 39.81                 |
| 42015              | Bradford, PA              | -0.007               | 59.22                     | 34.71                 |
| 42017              | Bucks, PA                 | -0.115               | 10.19                     | 8.31                  |
| 42019              | Butler, PA                | -0.048               | 38.78                     | 7.9                   |
| 42021              | Cambria, PA               | 0.017                | 68.77                     | 48.92                 |
| 42023              | Cameron, PA               | -0.072               | 26.52                     | 30.06                 |
| 42025              | Carbon, PA                | -0.022               | 52.37                     | 30.48                 |
| 42027              | Centre, PA                | 0.038                | 74.78                     | 28.92                 |
| 42029              | Chester, PA               | -0.077               | 24.39                     | 14.36                 |
| 42031              | Clarion, PA               | -0.033               | 46.93                     | 47.71                 |
| 42033              | Clearfield, PA            | 0.003                | 63.32                     | 60.54                 |
| 42035              | Clinton, PA               | -0.012               | 56.96                     | 48.6                  |
| 42037              | Columbia, PA              | -0.053               | 36.1                      | 27.68                 |
| 42039              | Crawford, PA              | 0.024                | 71                        | 50.64                 |
| 42041              | Cumberland, PA            | -0.053               | 36.61                     | 16.15                 |
| 42043              | Dauphin, PA               | -0.063               | 31.14                     | 49.75                 |
| 42045              | Delaware, PA              | -0.008               | 59.09                     | 41.31                 |
| 42047              | Elk, PA                   | -0.066               | 29.32                     | 11.66                 |
| 42049              | Erie, PA                  | -0.006               | 59.57                     | 61.94                 |
| 42051              | Fayette, PA               | 0.01                 | 66.22                     | 62.48                 |
| 42053              | Forest, PA                | 0.483                | 99.05                     | 71.15                 |
| 42055              | Franklin, PA              | -0.054               | 35.56                     | 33.73                 |
| 42057              | Fulton, PA                | -0.062               | 31.36                     | 22.01                 |
| 42059              | Greene, PA                | 0.009                | 65.97                     | 43.5                  |
| 42061              | Huntingdon, PA            | 0.085                | 84.91                     | 49.08                 |
| 42063              | Indiana, PA               | 0.036                | 74.34                     | 54.84                 |
| 42065              | Jefferson, PA             | -0.067               | 28.88                     | 33.12                 |
| 42067              | Juniata, PA               | -0.028               | 49.25                     | 44.84                 |
| 42069              | Lackawanna, PA            | -0.021               | 52.66                     | 52.52                 |
| 42071              | Lancaster, PA             | -0.03                | 48.55                     | 45.73                 |
| 42073              | Lawrence, PA              | -0.046               | 39.95                     | 46.94                 |
| 42075              | Lebanon, PA               | -0.013               | 56.61                     | 53.28                 |
| 42077              | Lehigh, PA                | -0.065               | 29.96                     | 63.5                  |
| 42079              | Luzerne, PA               | -0.031               | 48.14                     | 60.89                 |
| 42081              | Lycoming, PA              | -0.035               | 45.88                     | 42.1                  |
| 42083              | McKean, PA                | 0.022                | 70.14                     | 54.62                 |
| 42085              | Mercer, PA                | 0.035                | 74.18                     | 54.2                  |
| 42087              | Mifflin, PA               | -0.018               | 53.9                      | 47.23                 |
| 42089              | Monroe, PA                | -0.015               | 55.62                     | 30.64                 |
| 42091              | Montgomery, PA            | -0.114               | 10.41                     | 16.53                 |
| 42093              | Montour, PA               | 0.042                | 76.12                     | 31.11                 |
| 42095              | Northampton, PA           | -0.064               | 30.47                     | 28.76                 |
| 42097              | Northumberland, PA        | 0                    | 61.99                     | 50.06                 |
| 42099              | Perry, PA                 | -0.064               | 30.56                     | 10.89                 |
| 42101              | Philadelphia, PA          | 0.162                | 92.68                     | 92.04                 |
| 42103              | Pike, PA                  | -0.058               | 33.72                     | 12.87                 |
| 42105              | Potter, PA                | -0.052               | 36.9                      | 44.17                 |
| 42107              | Schuylkill, PA            | -0.022               | 52.31                     | 45.06                 |
| 42109              | Snyder, PA                | -0.018               | 54.41                     | 22.99                 |
| 42111              | Somerset, PA              | 0.006                | 64.85                     | 42.26                 |
| 42113              | Sullivan, PA              | -0.018               | 54                        | 35.76                 |



| <b>County FIPS</b> | <b>County Description</b> | <b>DOS-SVI Index</b> | <b>DOS-SVI Percentile</b> | <b>SVI Percentile</b> |
|--------------------|---------------------------|----------------------|---------------------------|-----------------------|
| 42115              | Susquehanna, PA           | -0.044               | 40.88                     | 20.64                 |
| 42117              | Tioga, PA                 | -0.056               | 34.8                      | 31.53                 |
| 42119              | Union, PA                 | 0.197                | 94.65                     | 36.05                 |
| 42121              | Venango, PA               | -0.033               | 46.64                     | 42.29                 |
| 42123              | Warren, PA                | -0.064               | 30.79                     | 21.34                 |
| 42125              | Washington, PA            | -0.025               | 50.72                     | 16.94                 |
| 42127              | Wayne, PA                 | 0.012                | 67.11                     | 26.31                 |
| 42129              | Westmoreland, PA          | -0.062               | 31.58                     | 13.79                 |
| 42131              | Wyoming, PA               | -0.016               | 55.37                     | 11.21                 |
| 42133              | York, PA                  | -0.06                | 32.41                     | 32.9                  |
| 44001              | Bristol, RI               | -0.058               | 33.56                     | 12.36                 |
| 44003              | Kent, RI                  | -0.157               | 3.63                      | 15.19                 |
| 44005              | Newport, RI               | -0.054               | 35.78                     | 17.9                  |
| 44007              | Providence, RI            | -0.099               | 15.44                     | 75.92                 |
| 44009              | Washington, RI            | -0.017               | 54.63                     | 8.89                  |
| 45001              | Abbeville, SC             | -0.006               | 59.69                     | 85.64                 |
| 45003              | Aiken, SC                 | -0.008               | 58.71                     | 66.66                 |
| 45005              | Allendale, SC             | 0.34                 | 98.25                     | 99.3                  |
| 45007              | Anderson, SC              | -0.023               | 52.18                     | 70.1                  |
| 45009              | Bamberg, SC               | 0.046                | 77.3                      | 95.16                 |
| 45011              | Barnwell, SC              | 0.032                | 73.03                     | 99.04                 |
| 45013              | Beaufort, SC              | -0.115               | 10.06                     | 40.06                 |
| 45015              | Berkeley, SC              | -0.085               | 21.39                     | 51.46                 |
| 45017              | Calhoun, SC               | 0.039                | 75.39                     | 56.27                 |
| 45019              | Charleston, SC            | -0.103               | 14.14                     | 31.56                 |
| 45021              | Cherokee, SC              | -0.065               | 29.8                      | 69.78                 |
| 45023              | Chester, SC               | 0.007                | 65.36                     | 73.63                 |
| 45025              | Chesterfield, SC          | 0.173                | 93.57                     | 94.87                 |
| 45027              | Clarendon, SC             | 0.15                 | 91.98                     | 97.93                 |
| 45029              | Colleton, SC              | 0.022                | 70.36                     | 80                    |
| 45031              | Darlington, SC            | 0.092                | 85.64                     | 92.68                 |
| 45033              | Dillon, SC                | 0.074                | 83.06                     | 96.82                 |
| 45035              | Dorchester, SC            | -0.076               | 24.8                      | 41.88                 |
| 45037              | Edgefield, SC             | 0.074                | 82.87                     | 84.84                 |
| 45039              | Fairfield, SC             | -0.006               | 59.73                     | 74.84                 |
| 45041              | Florence, SC              | 0.04                 | 75.61                     | 89.87                 |
| 45043              | Georgetown, SC            | -0.033               | 46.7                      | 67.71                 |
| 45045              | Greenville, SC            | -0.097               | 16.71                     | 50.38                 |
| 45047              | Greenwood, SC             | 0.009                | 65.9                      | 93.44                 |
| 45049              | Hampton, SC               | 0.058                | 79.85                     | 80.32                 |
| 45051              | Horry, SC                 | -0.259               | 0.41                      | 61.02                 |
| 45053              | Jasper, SC                | 0.015                | 68.16                     | 94.49                 |
| 45055              | Kershaw, SC               | -0.084               | 21.75                     | 49.59                 |
| 45057              | Lancaster, SC             | 0.001                | 62.81                     | 51.21                 |
| 45059              | Laurens, SC               | 0.031                | 72.78                     | 91.72                 |
| 45061              | Lee, SC                   | 0.133                | 90.77                     | 92.1                  |
| 45063              | Lexington, SC             | -0.04                | 43.46                     | 44.2                  |
| 45065              | McCormick, SC             | 0.123                | 89.69                     | 73.73                 |
| 45067              | Marion, SC                | 0.084                | 84.69                     | 92.93                 |
| 45069              | Marlboro, SC              | 0.242                | 96.08                     | 98.69                 |
| 45071              | Newberry, SC              | 0.019                | 69.31                     | 92.32                 |
| 45073              | Oconee, SC                | -0.079               | 23.69                     | 72.93                 |
| 45075              | Orangeburg, SC            | 0.096                | 86.31                     | 92.29                 |
| 45077              | Pickens, SC               | -0.052               | 37.06                     | 59.9                  |
| 45079              | Richland, SC              | -0.047               | 39.22                     | 63.09                 |

| <b>County FIPS</b> | <b>County Description</b> | <b>DOS-SVI Index</b> | <b>DOS-SVI Percentile</b> | <b>SVI Percentile</b> |
|--------------------|---------------------------|----------------------|---------------------------|-----------------------|
| 45081              | Saluda, SC                | -0.075               | 25.06                     | 79.49                 |
| 45083              | Spartanburg, SC           | -0.022               | 52.4                      | 76.18                 |
| 45085              | Sumter, SC                | 0.077                | 83.76                     | 97.32                 |
| 45087              | Union, SC                 | 0.005                | 64.56                     | 86.78                 |
| 45089              | Williamsburg, SC          | 0.142                | 91.4                      | 97.04                 |
| 45091              | York, SC                  | -0.083               | 22.29                     | 36.62                 |
| 46003              | Aurora, SD                | -0.093               | 18.24                     | 27.26                 |
| 46005              | Beadle, SD                | -0.063               | 31.04                     | 65.06                 |
| 46007              | Bennett, SD               | 0.487                | 99.08                     | 79.27                 |
| 46009              | Bon Homme, SD             | 0.095                | 86.12                     | 23.82                 |
| 46011              | Brookings, SD             | -0.094               | 17.96                     | 15.61                 |
| 46013              | Brown, SD                 | -0.115               | 10.31                     | 32.87                 |
| 46015              | Brule, SD                 | -0.098               | 16.01                     | 57.13                 |
| 46017              | Buffalo, SD               | 0.631                | 99.33                     | 97.1                  |
| 46019              | Butte, SD                 | -0.067               | 29                        | 36.27                 |
| 46021              | Campbell, SD              | -0.082               | 22.57                     | 0.64                  |
| 46023              | Charles Mix, SD           | 0.101                | 86.79                     | 73.89                 |
| 46025              | Clark, SD                 | -0.01                | 58.17                     | 17.1                  |
| 46027              | Clay, SD                  | -0.04                | 43.11                     | 24.68                 |
| 46029              | Codington, SD             | -0.085               | 21.3                      | 24.49                 |
| 46031              | Corson, SD                | 0.668                | 99.43                     | 83.95                 |
| 46033              | Custer, SD                | -0.04                | 42.98                     | 22.8                  |
| 46035              | Davison, SD               | -0.14                | 5.38                      | 23.38                 |
| 46037              | Day, SD                   | -0.152               | 3.92                      | 18.5                  |
| 46039              | Deuel, SD                 | -0.084               | 22.03                     | 8.22                  |
| 46041              | Dewey, SD                 | 0.681                | 99.52                     | 88.31                 |
| 46043              | Douglas, SD               | -0.016               | 55.33                     | 15.03                 |
| 46045              | Edmunds, SD               | -0.031               | 48.04                     | 3.41                  |
| 46047              | Fall River, SD            | -0.094               | 17.83                     | 41.72                 |
| 46049              | Faulk, SD                 | 0.001                | 62.5                      | 7.77                  |
| 46051              | Grant, SD                 | -0.161               | 3.22                      | 5.51                  |
| 46053              | Gregory, SD               | -0.078               | 23.97                     | 28.47                 |
| 46055              | Haakon, SD                | -0.104               | 14.01                     | 36.24                 |
| 46057              | Hamlin, SD                | 0.039                | 75.23                     | 15.86                 |
| 46059              | Hand, SD                  | -0.176               | 2.17                      | 3.09                  |
| 46061              | Hanson, SD                | -0.128               | 7.1                       | 0.13                  |
| 46063              | Harding, SD               | 0.004                | 64.12                     | 8.28                  |
| 46065              | Hughes, SD                | 0.012                | 67.27                     | 40.61                 |
| 46067              | Hutchinson, SD            | -0.025               | 50.75                     | 24.87                 |
| 46069              | Hyde, SD                  | 0.005                | 64.5                      | 9.43                  |
| 46071              | Jackson, SD               | 0.578                | 99.24                     | 96.66                 |
| 46073              | Jerauld, SD               | -0.129               | 6.97                      | 5.06                  |
| 46075              | Jones, SD                 | -0.095               | 17.29                     | 0.51                  |
| 46077              | Kingsbury, SD             | -0.136               | 6.02                      | 2.23                  |
| 46079              | Lake, SD                  | -0.001               | 61.83                     | 19.65                 |
| 46081              | Lawrence, SD              | -0.079               | 23.66                     | 26.18                 |
| 46083              | Lincoln, SD               | -0.148               | 4.27                      | 2.01                  |
| 46085              | Lyman, SD                 | 0.237                | 95.86                     | 71.37                 |
| 46087              | McCook, SD                | -0.016               | 55.08                     | 22.29                 |
| 46089              | McPherson, SD             | -0.037               | 45.05                     | 28.89                 |
| 46091              | Marshall, SD              | -0.017               | 54.54                     | 21.31                 |
| 46093              | Meade, SD                 | -0.064               | 30.5                      | 8.92                  |
| 46095              | Mellette, SD              | 0.424                | 98.79                     | 91.56                 |
| 46097              | Miner, SD                 | -0.02                | 53.3                      | 10.57                 |
| 46099              | Minnehaha, SD             | -0.174               | 2.36                      | 35.89                 |

| <b>County FIPS</b> | <b>County Description</b> | <b>DOS-SVI Index</b> | <b>DOS-SVI Percentile</b> | <b>SVI Percentile</b> |
|--------------------|---------------------------|----------------------|---------------------------|-----------------------|
| 46101              | Moody, SD                 | -0.006               | 59.79                     | 39.08                 |
| 46102              | Oglala Lakota, SD         | 1.926                | 99.84                     | 99.43                 |
| 46103              | Pennington, SD            | -0.068               | 28.37                     | 41.62                 |
| 46105              | Perkins, SD               | -0.041               | 42.76                     | 10.96                 |
| 46107              | Potter, SD                | -0.105               | 13.5                      | 5.16                  |
| 46109              | Roberts, SD               | 0.013                | 67.62                     | 71.78                 |
| 46111              | Sanborn, SD               | -0.121               | 8.85                      | 3.85                  |
| 46115              | Spink, SD                 | -0.096               | 17.07                     | 17.68                 |
| 46117              | Stanley, SD               | -0.089               | 19.96                     | 10.99                 |
| 46119              | Sully, SD                 | -0.118               | 9.58                      | 0.73                  |
| 46121              | Todd, SD                  | 0.751                | 99.62                     | 95.64                 |
| 46123              | Tripp, SD                 | -0.122               | 8.5                       | 34.11                 |
| 46125              | Turner, SD                | -0.122               | 8.37                      | 10.8                  |
| 46127              | Union, SD                 | -0.199               | 1.24                      | 2.74                  |
| 46129              | Walworth, SD              | 0.08                 | 84.14                     | 39.39                 |
| 46135              | Yankton, SD               | -0.119               | 9.27                      | 31.59                 |
| 46137              | Ziebach, SD               | 0.871                | 99.71                     | 95.38                 |
| 47001              | Anderson, TN              | -0.1                 | 14.99                     | 60.64                 |
| 47003              | Bedford, TN               | -0.006               | 59.92                     | 77.58                 |
| 47005              | Benton, TN                | -0.054               | 35.75                     | 70.29                 |
| 47007              | Bledsoe, TN               | -0.003               | 60.65                     | 81.59                 |
| 47009              | Blount, TN                | -0.072               | 26.87                     | 24.52                 |
| 47011              | Bradley, TN               | -0.042               | 41.93                     | 69.14                 |
| 47013              | Campbell, TN              | -0.132               | 6.53                      | 73.38                 |
| 47015              | Cannon, TN                | -0.053               | 36.33                     | 37.04                 |
| 47017              | Carroll, TN               | -0.036               | 45.56                     | 74.43                 |
| 47019              | Carter, TN                | -0.108               | 12.58                     | 61.53                 |
| 47021              | Cheatham, TN              | -0.086               | 21.01                     | 23.69                 |
| 47023              | Chester, TN               | 0.053                | 78.64                     | 64.36                 |
| 47025              | Claiborne, TN             | -0.047               | 39.48                     | 71.02                 |
| 47027              | Clay, TN                  | -0.104               | 14.07                     | 59.39                 |
| 47029              | Cocke, TN                 | -0.109               | 12.22                     | 68.57                 |
| 47031              | Coffee, TN                | -0.033               | 47.09                     | 49.14                 |
| 47033              | Crockett, TN              | -0.009               | 58.36                     | 78.12                 |
| 47035              | Cumberland, TN            | -0.061               | 32.12                     | 53.73                 |
| 47037              | Davidson, TN              | -0.214               | 0.89                      | 53.63                 |
| 47039              | Decatur, TN               | -0.064               | 30.63                     | 50.86                 |
| 47041              | DeKalb, TN                | -0.025               | 50.62                     | 43.06                 |
| 47043              | Dickson, TN               | -0.052               | 37.31                     | 42.9                  |
| 47045              | Dyer, TN                  | -0.044               | 41.07                     | 75.96                 |
| 47047              | Fayette, TN               | -0.05                | 38.01                     | 25.54                 |
| 47049              | Fentress, TN              | -0.003               | 60.62                     | 63.73                 |
| 47051              | Franklin, TN              | -0.054               | 35.91                     | 37.64                 |
| 47053              | Gibson, TN                | -0.05                | 38.2                      | 73.5                  |
| 47055              | Giles, TN                 | -0.019               | 53.61                     | 60.32                 |
| 47057              | Grainger, TN              | -0.062               | 31.52                     | 59.3                  |
| 47059              | Greene, TN                | -0.077               | 24.29                     | 54.46                 |
| 47061              | Grundy, TN                | -0.033               | 46.67                     | 86.85                 |
| 47063              | Hamblen, TN               | -0.064               | 30.75                     | 81.46                 |
| 47065              | Hamilton, TN              | -0.099               | 15.41                     | 41.37                 |
| 47067              | Hancock, TN               | -0.077               | 24.23                     | 76.66                 |
| 47069              | Hardeman, TN              | 0.146                | 91.79                     | 86.72                 |
| 47071              | Hardin, TN                | -0.033               | 46.8                      | 70.64                 |
| 47073              | Hawkins, TN               | -0.063               | 30.95                     | 70.8                  |
| 47075              | Haywood, TN               | 0.009                | 66.03                     | 87.17                 |

| <b>County FIPS</b> | <b>County Description</b> | <b>DOS-SVI Index</b> | <b>DOS-SVI Percentile</b> | <b>SVI Percentile</b> |
|--------------------|---------------------------|----------------------|---------------------------|-----------------------|
| 47077              | Henderson, TN             | 0.003                | 63.29                     | 69.81                 |
| 47079              | Henry, TN                 | -0.081               | 22.99                     | 63.47                 |
| 47081              | Hickman, TN               | -0.044               | 41.16                     | 56.62                 |
| 47083              | Houston, TN               | -0.111               | 11.59                     | 55.51                 |
| 47085              | Humphreys, TN             | -0.072               | 26.81                     | 36.88                 |
| 47087              | Jackson, TN               | -0.076               | 24.83                     | 60                    |
| 47089              | Jefferson, TN             | -0.031               | 47.95                     | 56.08                 |
| 47091              | Johnson, TN               | -0.051               | 37.82                     | 56.53                 |
| 47093              | Knox, TN                  | -0.146               | 4.55                      | 30.35                 |
| 47095              | Lake, TN                  | 0.335                | 98.06                     | 91.85                 |
| 47097              | Lauderdale, TN            | 0.172                | 93.5                      | 96.72                 |
| 47099              | Lawrence, TN              | 0.03                 | 72.43                     | 83.18                 |
| 47101              | Lewis, TN                 | -0.001               | 61.48                     | 63.63                 |
| 47103              | Lincoln, TN               | -0.002               | 61.03                     | 67.77                 |
| 47105              | Loudon, TN                | -0.035               | 46.16                     | 38.63                 |
| 47107              | McMinn, TN                | -0.04                | 43.49                     | 65.51                 |
| 47109              | McNairy, TN               | 0.041                | 75.87                     | 71.72                 |
| 47111              | Macon, TN                 | -0.146               | 4.62                      | 69.27                 |
| 47113              | Madison, TN               | -0.005               | 60.11                     | 71.24                 |
| 47115              | Marion, TN                | -0.075               | 25.69                     | 50.61                 |
| 47117              | Marshall, TN              | -0.055               | 35.27                     | 60.99                 |
| 47119              | Maury, TN                 | -0.039               | 43.94                     | 39.49                 |
| 47121              | Meigs, TN                 | 0.025                | 71.25                     | 49.33                 |
| 47123              | Monroe, TN                | 0.016                | 68.55                     | 64.78                 |
| 47125              | Montgomery, TN            | -0.042               | 42.06                     | 51.72                 |
| 47127              | Moore, TN                 | -0.03                | 48.65                     | 9.14                  |
| 47129              | Morgan, TN                | 0.108                | 87.9                      | 74.94                 |
| 47131              | Obion, TN                 | -0.064               | 30.69                     | 76.94                 |
| 47133              | Overton, TN               | -0.037               | 44.86                     | 45.76                 |
| 47135              | Perry, TN                 | 0.015                | 68.19                     | 67.99                 |
| 47137              | Pickett, TN               | -0.106               | 13.15                     | 41.53                 |
| 47139              | Polk, TN                  | 0.015                | 68.13                     | 49.04                 |
| 47141              | Putnam, TN                | -0.106               | 13.18                     | 61.82                 |
| 47143              | Rhea, TN                  | -0.069               | 28.11                     | 82.07                 |
| 47145              | Roane, TN                 | -0.031               | 48.27                     | 38.44                 |
| 47147              | Robertson, TN             | -0.016               | 55.3                      | 42.87                 |
| 47149              | Rutherford, TN            | -0.109               | 12.29                     | 32.68                 |
| 47151              | Scott, TN                 | -0.158               | 3.53                      | 76.37                 |
| 47153              | Sequatchie, TN            | -0.023               | 52.05                     | 57.2                  |
| 47155              | Sevier, TN                | -0.117               | 9.74                      | 61.11                 |
| 47157              | Shelby, TN                | -0.041               | 42.5                      | 78.47                 |
| 47159              | Smith, TN                 | -0.076               | 24.96                     | 26.08                 |
| 47161              | Stewart, TN               | -0.053               | 36.45                     | 40.86                 |
| 47163              | Sullivan, TN              | -0.09                | 19.45                     | 54.11                 |
| 47165              | Sumner, TN                | -0.138               | 5.67                      | 20.57                 |
| 47167              | Tipton, TN                | -0.024               | 51.23                     | 45                    |
| 47169              | Trousdale, TN             | -0.105               | 13.34                     | 52.2                  |
| 47171              | Unicoi, TN                | -0.08                | 23.34                     | 79.81                 |
| 47173              | Union, TN                 | 0.006                | 64.6                      | 66.72                 |
| 47175              | Van Buren, TN             | 0.059                | 80.04                     | 60.25                 |
| 47177              | Warren, TN                | -0.103               | 14.23                     | 83.22                 |
| 47179              | Washington, TN            | -0.122               | 8.66                      | 45.89                 |
| 47181              | Wayne, TN                 | 0.123                | 89.59                     | 76.24                 |
| 47183              | Weakley, TN               | -0.018               | 54.22                     | 65.83                 |
| 47185              | White, TN                 | -0.017               | 54.98                     | 59.84                 |

| <b>County FIPS</b> | <b>County Description</b> | <b>DOS-SVI Index</b> | <b>DOS-SVI Percentile</b> | <b>SVI Percentile</b> |
|--------------------|---------------------------|----------------------|---------------------------|-----------------------|
| 47187              | Williamson, TN            | -0.079               | 23.62                     | 2.1                   |
| 47189              | Wilson, TN                | -0.101               | 14.74                     | 14.65                 |
| 48001              | Anderson, TX              | 0.24                 | 96.02                     | 79.46                 |
| 48003              | Andrews, TX               | 0.161                | 92.65                     | 47.36                 |
| 48005              | Angelina, TX              | 0.076                | 83.57                     | 97.71                 |
| 48007              | Aransas, TX               | -0.001               | 61.73                     | 80.19                 |
| 48009              | Archer, TX                | -0.051               | 37.79                     | 8.98                  |
| 48011              | Armstrong, TX             | -0.031               | 48.07                     | 15.99                 |
| 48013              | Atascosa, TX              | 0.292                | 97.29                     | 84.97                 |
| 48015              | Austin, TX                | 0.095                | 86.06                     | 49.36                 |
| 48017              | Bailey, TX                | 0.047                | 77.59                     | 80.03                 |
| 48019              | Bandera, TX               | -0.005               | 60.05                     | 50.76                 |
| 48021              | Bastrop, TX               | 0.145                | 91.72                     | 74.59                 |
| 48023              | Baylor, TX                | -0.168               | 2.67                      | 15.54                 |
| 48025              | Bee, TX                   | 0.441                | 98.89                     | 96.94                 |
| 48027              | Bell, TX                  | 0.057                | 79.53                     | 80.51                 |
| 48029              | Bexar, TX                 | -0.094               | 17.77                     | 82.58                 |
| 48031              | Blanco, TX                | 0.081                | 84.3                      | 27.83                 |
| 48033              | Borden, TX                | -0.123               | 8.31                      | 6.21                  |
| 48035              | Bosque, TX                | 0.023                | 70.65                     | 61.75                 |
| 48037              | Bowie, TX                 | 0.105                | 87.61                     | 85.29                 |
| 48039              | Brazoria, TX              | -0.017               | 54.79                     | 51.34                 |
| 48041              | Brazos, TX                | -0.106               | 13.12                     | 65.32                 |
| 48043              | Brewster, TX              | -0.033               | 46.61                     | 65.73                 |
| 48045              | Briscoe, TX               | -0.073               | 26.2                      | 45.64                 |
| 48047              | Brooks, TX                | 0.15                 | 91.94                     | 100                   |
| 48049              | Brown, TX                 | -0.028               | 49.41                     | 62.77                 |
| 48051              | Burleson, TX              | 0.164                | 92.96                     | 60.8                  |
| 48053              | Burnet, TX                | -0.016               | 55.56                     | 52.99                 |
| 48055              | Caldwell, TX              | 0.19                 | 94.4                      | 87.32                 |
| 48057              | Calhoun, TX               | 0.229                | 95.67                     | 86.18                 |
| 48059              | Callahan, TX              | -0.053               | 36.42                     | 29.68                 |
| 48061              | Cameron, TX               | 0.102                | 86.98                     | 97.58                 |
| 48063              | Camp, TX                  | 0.117                | 88.83                     | 90.19                 |
| 48065              | Carson, TX                | -0.108               | 12.48                     | 3.38                  |
| 48067              | Cass, TX                  | 0.143                | 91.5                      | 78.41                 |
| 48069              | Castro, TX                | -0.043               | 41.23                     | 77.74                 |
| 48071              | Chambers, TX              | -0.019               | 53.71                     | 41.08                 |
| 48073              | Cherokee, TX              | 0.193                | 94.59                     | 91.91                 |
| 48075              | Childress, TX             | 0.121                | 89.21                     | 75                    |
| 48077              | Clay, TX                  | 0.011                | 66.7                      | 31.82                 |
| 48079              | Cochran, TX               | 0.015                | 68.42                     | 86.08                 |
| 48081              | Coke, TX                  | -0.083               | 22.35                     | 62.04                 |
| 48083              | Coleman, TX               | -0.151               | 3.95                      | 41.85                 |
| 48085              | Collin, TX                | -0.174               | 2.26                      | 15.06                 |
| 48087              | Collingsworth, TX         | 0.08                 | 84.11                     | 88.76                 |
| 48089              | Colorado, TX              | 0.174                | 93.63                     | 68.47                 |
| 48091              | Comal, TX                 | -0.077               | 24.61                     | 23.79                 |
| 48093              | Comanche, TX              | -0.061               | 32.22                     | 72.64                 |
| 48095              | Concho, TX                | -0.089               | 20.12                     | 42.83                 |
| 48097              | Cooke, TX                 | 0.033                | 73.64                     | 62.26                 |
| 48099              | Coryell, TX               | 0.201                | 94.81                     | 78.09                 |
| 48101              | Cottle, TX                | 0.076                | 83.54                     | 93.63                 |
| 48103              | Crane, TX                 | 0.103                | 87.14                     | 47.39                 |
| 48105              | Crockett, TX              | 0.031                | 72.84                     | 68.92                 |

| <b>County FIPS</b> | <b>County Description</b> | <b>DOS-SVI Index</b> | <b>DOS-SVI Percentile</b> | <b>SVI Percentile</b> |
|--------------------|---------------------------|----------------------|---------------------------|-----------------------|
| 48107              | Crosby, TX                | 0.206                | 95.1                      | 93.95                 |
| 48109              | Culberson, TX             | -0.088               | 20.6                      | 99.71                 |
| 48111              | Dallam, TX                | -0.299               | 0.26                      | 55.03                 |
| 48113              | Dallas, TX                | -0.159               | 3.44                      | 75.38                 |
| 48115              | Dawson, TX                | 0.11                 | 88.09                     | 94.75                 |
| 48117              | Deaf Smith, TX            | -0.088               | 20.63                     | 84.11                 |
| 48119              | Delta, TX                 | -0.019               | 53.49                     | 57.04                 |
| 48121              | Denton, TX                | -0.162               | 3.18                      | 22.1                  |
| 48123              | DeWitt, TX                | 0.186                | 94.14                     | 82.29                 |
| 48125              | Dickens, TX               | 0.251                | 96.31                     | 87.96                 |
| 48127              | Dimmit, TX                | 0.304                | 97.52                     | 99.97                 |
| 48129              | Donley, TX                | 0.032                | 73.07                     | 45.25                 |
| 48131              | Duval, TX                 | 0.205                | 95.06                     | 99.94                 |
| 48133              | Eastland, TX              | -0.014               | 56.13                     | 80.67                 |
| 48135              | Ector, TX                 | -0.032               | 47.44                     | 79.24                 |
| 48137              | Edwards, TX               | -0.087               | 20.79                     | 43.85                 |
| 48139              | Ellis, TX                 | -0.034               | 46.26                     | 39.24                 |
| 48141              | El Paso, TX               | -0.125               | 7.8                       | 95.35                 |
| 48143              | Erath, TX                 | -0.075               | 25.18                     | 62.52                 |
| 48145              | Falls, TX                 | 0.197                | 94.62                     | 97.99                 |
| 48147              | Fannin, TX                | 0.065                | 81.28                     | 57.58                 |
| 48149              | Fayette, TX               | -0.075               | 25.09                     | 43.63                 |
| 48151              | Fisher, TX                | -0.032               | 47.31                     | 43.12                 |
| 48153              | Floyd, TX                 | 0.125                | 89.97                     | 82.99                 |
| 48155              | Foard, TX                 | -0.049               | 38.55                     | 47.83                 |
| 48157              | Fort Bend, TX             | -0.026               | 49.98                     | 28.73                 |
| 48159              | Franklin, TX              | 0.032                | 73.32                     | 52.77                 |
| 48161              | Freestone, TX             | 0.056                | 79.4                      | 84.3                  |
| 48163              | Frio, TX                  | 0.284                | 97.2                      | 98.66                 |
| 48165              | Gaines, TX                | 0.018                | 69.21                     | 68.25                 |
| 48167              | Galveston, TX             | -0.08                | 23.11                     | 58.5                  |
| 48169              | Garza, TX                 | -0.024               | 51.35                     | 72.13                 |
| 48171              | Gillespie, TX             | 0.037                | 74.37                     | 35.73                 |
| 48173              | Glasscock, TX             | -0.174               | 2.32                      | 17.61                 |
| 48175              | Goliad, TX                | 0.054                | 78.86                     | 58.15                 |
| 48177              | Gonzales, TX              | 0.267                | 96.69                     | 89.59                 |
| 48179              | Gray, TX                  | 0.008                | 65.74                     | 84.46                 |
| 48181              | Grayson, TX               | -0.025               | 50.52                     | 65.92                 |
| 48183              | Gregg, TX                 | -0.064               | 30.31                     | 88.25                 |
| 48185              | Grimes, TX                | 0.148                | 91.88                     | 86.02                 |
| 48187              | Guadalupe, TX             | -0.01                | 58.01                     | 43.44                 |
| 48189              | Hale, TX                  | 0.145                | 91.69                     | 93.12                 |
| 48191              | Hall, TX                  | -0.025               | 50.97                     | 95                    |
| 48193              | Hamilton, TX              | -0.097               | 16.75                     | 60.83                 |
| 48195              | Hansford, TX              | -0.172               | 2.42                      | 76.15                 |
| 48197              | Hardeman, TX              | -0.072               | 26.84                     | 72.8                  |
| 48199              | Hardin, TX                | -0.053               | 36.23                     | 25.32                 |
| 48201              | Harris, TX                | -0.198               | 1.3                       | 72.36                 |
| 48203              | Harrison, TX              | 0.083                | 84.4                      | 73.06                 |
| 48205              | Hartley, TX               | 0.203                | 94.94                     | 53.44                 |
| 48207              | Haskell, TX               | -0.003               | 60.71                     | 97.55                 |
| 48209              | Hays, TX                  | -0.036               | 45.49                     | 49.24                 |
| 48211              | Hemphill, TX              | 0.065                | 81.31                     | 74.27                 |
| 48213              | Henderson, TX             | -0.009               | 58.48                     | 72.01                 |
| 48215              | Hidalgo, TX               | 0.183                | 93.89                     | 97.8                  |

| <b>County FIPS</b> | <b>County Description</b> | <b>DOS-SVI Index</b> | <b>DOS-SVI Percentile</b> | <b>SVI Percentile</b> |
|--------------------|---------------------------|----------------------|---------------------------|-----------------------|
| 48217              | Hill, TX                  | 0.127                | 90.23                     | 87.07                 |
| 48219              | Hockley, TX               | 0.118                | 88.95                     | 90.25                 |
| 48221              | Hood, TX                  | -0.071               | 27.09                     | 26.02                 |
| 48223              | Hopkins, TX               | -0.014               | 56.06                     | 70.67                 |
| 48225              | Houston, TX               | 0.102                | 87.01                     | 91.31                 |
| 48227              | Howard, TX                | 0.006                | 64.72                     | 91.53                 |
| 48229              | Hudspeth, TX              | -0.166               | 2.87                      | 98.25                 |
| 48231              | Hunt, TX                  | 0.084                | 84.75                     | 83.41                 |
| 48233              | Hutchinson, TX            | -0.036               | 45.46                     | 66.31                 |
| 48235              | Irion, TX                 | 0.104                | 87.33                     | 20.13                 |
| 48237              | Jack, TX                  | 0.114                | 88.51                     | 65.38                 |
| 48239              | Jackson, TX               | 0.118                | 88.92                     | 67.74                 |
| 48241              | Jasper, TX                | 0.069                | 82.11                     | 82.39                 |
| 48243              | Jeff Davis, TX            | -0.097               | 16.84                     | 36.11                 |
| 48245              | Jefferson, TX             | -0.057               | 33.94                     | 85.67                 |
| 48247              | Jim Hogg, TX              | 0.255                | 96.43                     | 99.17                 |
| 48249              | Jim Wells, TX             | 0.131                | 90.51                     | 92.26                 |
| 48251              | Johnson, TX               | 0.017                | 68.7                      | 50.73                 |
| 48253              | Jones, TX                 | 0.277                | 97.01                     | 63.28                 |
| 48255              | Karnes, TX                | 0.187                | 94.21                     | 84.24                 |
| 48257              | Kaufman, TX               | 0.028                | 71.89                     | 56.91                 |
| 48259              | Kendall, TX               | -0.066               | 29.55                     | 22.83                 |
| 48261              | Kenedy, TX                | -0.36                | 0.13                      | 73.28                 |
| 48263              | Kent, TX                  | -0.084               | 21.94                     | 44.27                 |
| 48265              | Kerr, TX                  | -0.003               | 60.87                     | 69.59                 |
| 48267              | Kimble, TX                | -0.167               | 2.8                       | 58.85                 |
| 48269              | King, TX                  | -0.178               | 2.13                      | 19.55                 |
| 48271              | Kinney, TX                | -0.213               | 0.96                      | 85.61                 |
| 48273              | Kleberg, TX               | 0.221                | 95.54                     | 98.34                 |
| 48275              | Knox, TX                  | -0.041               | 42.69                     | 79.62                 |
| 48277              | Lamar, TX                 | -0.054               | 35.72                     | 83.57                 |
| 48279              | Lamb, TX                  | -0.117               | 9.68                      | 89.75                 |
| 48281              | Lampasas, TX              | 0.029                | 72.05                     | 54.43                 |
| 48283              | La Salle, TX              | 0.216                | 95.42                     | 81.91                 |
| 48285              | Lavaca, TX                | 0.241                | 96.05                     | 68.79                 |
| 48287              | Lee, TX                   | 0.087                | 85.16                     | 67.52                 |
| 48289              | Leon, TX                  | -0.01                | 58.13                     | 61.56                 |
| 48291              | Liberty, TX               | 0.162                | 92.71                     | 94.27                 |
| 48293              | Limestone, TX             | 0.099                | 86.6                      | 95.32                 |
| 48295              | Lipscomb, TX              | -0.002               | 61.41                     | 46.05                 |
| 48297              | Live Oak, TX              | 0.039                | 75.45                     | 69.17                 |
| 48299              | Llano, TX                 | 0.027                | 71.79                     | 46.66                 |
| 48301              | Loving, TX                | 0.768                | 99.65                     | 75.73                 |
| 48303              | Lubbock, TX               | -0.098               | 16.3                      | 74.97                 |
| 48305              | Lynn, TX                  | -0.015               | 55.84                     | 89.08                 |
| 48307              | McCulloch, TX             | -0.108               | 12.45                     | 73.95                 |
| 48309              | McLennan, TX              | -0.092               | 18.78                     | 84.36                 |
| 48311              | McMullen, TX              | 0.639                | 99.36                     | 76.31                 |
| 48313              | Madison, TX               | 0.393                | 98.57                     | 83.76                 |
| 48315              | Marion, TX                | 0.06                 | 80.23                     | 68.85                 |
| 48317              | Martin, TX                | 0.173                | 93.6                      | 42.39                 |
| 48319              | Mason, TX                 | -0.168               | 2.71                      | 35.7                  |
| 48321              | Matagorda, TX             | -0.012               | 57.08                     | 90.67                 |
| 48323              | Maverick, TX              | 0.052                | 78.51                     | 97.42                 |
| 48325              | Medina, TX                | 0.039                | 75.07                     | 66.97                 |

| <b>County FIPS</b> | <b>County Description</b> | <b>DOS-SVI Index</b> | <b>DOS-SVI Percentile</b> | <b>SVI Percentile</b> |
|--------------------|---------------------------|----------------------|---------------------------|-----------------------|
| 48327              | Menard, TX                | -0.105               | 13.59                     | 58.54                 |
| 48329              | Midland, TX               | 0.039                | 75.33                     | 47.48                 |
| 48331              | Milam, TX                 | 0.08                 | 84.08                     | 76.27                 |
| 48333              | Mills, TX                 | -0.133               | 6.43                      | 76.88                 |
| 48335              | Mitchell, TX              | 0.417                | 98.73                     | 62.13                 |
| 48337              | Montague, TX              | -0.017               | 54.82                     | 58.41                 |
| 48339              | Montgomery, TX            | -0.066               | 29.29                     | 39.14                 |
| 48341              | Moore, TX                 | 0.043                | 76.47                     | 69.9                  |
| 48343              | Morris, TX                | 0.111                | 88.12                     | 72.99                 |
| 48345              | Motley, TX                | 0.201                | 94.84                     | 70.03                 |
| 48347              | Nacogdoches, TX           | 0.05                 | 78.13                     | 98.22                 |
| 48349              | Navarro, TX               | 0.032                | 73.1                      | 96.62                 |
| 48351              | Newton, TX                | -0.013               | 56.38                     | 72.07                 |
| 48353              | Nolan, TX                 | 0.12                 | 89.08                     | 88.66                 |
| 48355              | Nueces, TX                | 0.063                | 80.83                     | 83.63                 |
| 48357              | Ochiltree, TX             | 0.039                | 75.29                     | 57.87                 |
| 48359              | Oldham, TX                | 0.359                | 98.34                     | 43.22                 |
| 48361              | Orange, TX                | 0.013                | 67.53                     | 58.12                 |
| 48363              | Palo Pinto, TX            | 0.066                | 81.34                     | 87.99                 |
| 48365              | Panola, TX                | 0.022                | 70.33                     | 69.52                 |
| 48367              | Parker, TX                | 0.037                | 74.5                      | 25.61                 |
| 48369              | Parmer, TX                | 0.132                | 90.64                     | 75.76                 |
| 48371              | Pecos, TX                 | 0.132                | 90.67                     | 82.13                 |
| 48373              | Polk, TX                  | 0.066                | 81.38                     | 91.21                 |
| 48375              | Potter, TX                | 0.01                 | 66.54                     | 92.48                 |
| 48377              | Presidio, TX              | -0.175               | 2.2                       | 99.81                 |
| 48379              | Rains, TX                 | 0.076                | 83.44                     | 40.16                 |
| 48381              | Randall, TX               | -0.101               | 14.84                     | 22.04                 |
| 48383              | Reagan, TX                | -0.194               | 1.47                      | 48.06                 |
| 48385              | Real, TX                  | -0.113               | 10.82                     | 71.69                 |
| 48387              | Red River, TX             | -0.057               | 34.35                     | 56.5                  |
| 48389              | Reeves, TX                | 0.083                | 84.53                     | 78.03                 |
| 48391              | Refugio, TX               | 0.044                | 76.79                     | 94.14                 |
| 48393              | Roberts, TX               | -0.138               | 5.73                      | 9.11                  |
| 48395              | Robertson, TX             | 0.187                | 94.24                     | 75.29                 |
| 48397              | Rockwall, TX              | -0.019               | 53.55                     | 11.24                 |
| 48399              | Runnels, TX               | -0.104               | 13.91                     | 54.49                 |
| 48401              | Rusk, TX                  | 0.065                | 81.25                     | 79.65                 |
| 48403              | Sabine, TX                | -0.041               | 42.44                     | 53.09                 |
| 48405              | San Augustine, TX         | 0.084                | 84.59                     | 88.89                 |
| 48407              | San Jacinto, TX           | 0.076                | 83.48                     | 68.69                 |
| 48409              | San Patricio, TX          | 0.164                | 92.93                     | 83.09                 |
| 48411              | San Saba, TX              | -0.001               | 61.64                     | 73.15                 |
| 48413              | Schleicher, TX            | 0.189                | 94.33                     | 58.57                 |
| 48415              | Scurry, TX                | 0.243                | 96.12                     | 69.94                 |
| 48417              | Shackelford, TX           | 0.137                | 91.02                     | 68.5                  |
| 48419              | Shelby, TX                | 0.004                | 63.77                     | 95.22                 |
| 48421              | Sherman, TX               | -0.115               | 10.28                     | 46.11                 |
| 48423              | Smith, TX                 | -0.052               | 37.54                     | 74.62                 |
| 48425              | Somervell, TX             | 0.317                | 97.77                     | 56.05                 |
| 48427              | Starr, TX                 | 0.139                | 91.25                     | 98.15                 |
| 48429              | Stephens, TX              | -0.085               | 21.46                     | 88.5                  |
| 48431              | Sterling, TX              | -0.062               | 31.55                     | 41.27                 |
| 48433              | Stonewall, TX             | 0.015                | 68.29                     | 32.36                 |
| 48435              | Sutton, TX                | 0.14                 | 91.31                     | 60.41                 |



| <b>County FIPS</b> | <b>County Description</b> | <b>DOS-SVI Index</b> | <b>DOS-SVI Percentile</b> | <b>SVI Percentile</b> |
|--------------------|---------------------------|----------------------|---------------------------|-----------------------|
| 48437              | Swisher, TX               | 0.154                | 92.17                     | 97.01                 |
| 48439              | Tarrant, TX               | -0.101               | 14.96                     | 54.75                 |
| 48441              | Taylor, TX                | -0.075               | 25.21                     | 69.33                 |
| 48443              | Terrell, TX               | -0.118               | 9.39                      | 47.13                 |
| 48445              | Terry, TX                 | 0.12                 | 89.05                     | 98.76                 |
| 48447              | Throckmorton, TX          | -0.201               | 1.21                      | 26.78                 |
| 48449              | Titus, TX                 | 0.138                | 91.18                     | 89.01                 |
| 48451              | Tom Green, TX             | -0.089               | 19.71                     | 66.43                 |
| 48453              | Travis, TX                | -0.194               | 1.43                      | 38.12                 |
| 48455              | Trinity, TX               | 0.021                | 69.95                     | 80.16                 |
| 48457              | Tyler, TX                 | 0.324                | 97.9                      | 88.34                 |
| 48459              | Upshur, TX                | 0.115                | 88.57                     | 58.98                 |
| 48461              | Upton, TX                 | -0.072               | 26.9                      | 65.19                 |
| 48463              | Uvalde, TX                | -0.039               | 44.13                     | 95.48                 |
| 48465              | Val Verde, TX             | 0.068                | 81.85                     | 96.78                 |
| 48467              | Van Zandt, TX             | -0.025               | 50.88                     | 55.89                 |
| 48469              | Victoria, TX              | 0.088                | 85.26                     | 78.34                 |
| 48471              | Walker, TX                | 0.124                | 89.81                     | 69.97                 |
| 48473              | Waller, TX                | 0.221                | 95.58                     | 83.31                 |
| 48475              | Ward, TX                  | 0.079                | 83.95                     | 64.94                 |
| 48477              | Washington, TX            | 0.067                | 81.53                     | 73.12                 |
| 48479              | Webb, TX                  | 0.115                | 88.54                     | 94.97                 |
| 48481              | Wharton, TX               | 0.043                | 76.31                     | 87.58                 |
| 48483              | Wheeler, TX               | 0.054                | 78.92                     | 69.62                 |
| 48485              | Wichita, TX               | 0.025                | 71.06                     | 81.66                 |
| 48487              | Wilbarger, TX             | -0.028               | 49.54                     | 90.83                 |
| 48489              | Willacy, TX               | 0.278                | 97.04                     | 98.92                 |
| 48491              | Williamson, TX            | -0.118               | 9.62                      | 20.16                 |
| 48493              | Wilson, TX                | 0.169                | 93.28                     | 44.36                 |
| 48495              | Winkler, TX               | -0.139               | 5.6                       | 65.41                 |
| 48497              | Wise, TX                  | 0.012                | 67.33                     | 57.68                 |
| 48499              | Wood, TX                  | -0.029               | 48.97                     | 63.22                 |
| 48501              | Yoakum, TX                | 0.144                | 91.66                     | 49.2                  |
| 48503              | Young, TX                 | -0.03                | 48.52                     | 55.32                 |
| 48505              | Zapata, TX                | 0.488                | 99.11                     | 98.95                 |
| 48507              | Zavala, TX                | 0.044                | 76.63                     | 99.87                 |
| 49001              | Beaver, UT                | 0.171                | 93.47                     | 25.22                 |
| 49003              | Box Elder, UT             | 0                    | 62.21                     | 15.92                 |
| 49005              | Cache, UT                 | -0.009               | 58.23                     | 32.01                 |
| 49007              | Carbon, UT                | 0.03                 | 72.46                     | 56.15                 |
| 49009              | Daggett, UT               | 0.31                 | 97.68                     | 7.55                  |
| 49011              | Davis, UT                 | -0.022               | 52.24                     | 7.96                  |
| 49013              | Duchesne, UT              | 0.158                | 92.42                     | 48.22                 |
| 49015              | Emery, UT                 | 0.099                | 86.63                     | 26.27                 |
| 49017              | Garfield, UT              | 0.023                | 70.58                     | 45.92                 |
| 49019              | Grand, UT                 | 0.191                | 94.43                     | 52.13                 |
| 49021              | Iron, UT                  | -0.023               | 52.09                     | 45.25                 |
| 49023              | Juab, UT                  | 0.198                | 94.68                     | 23.31                 |
| 49025              | Kane, UT                  | -0.054               | 36.04                     | 10.54                 |
| 49027              | Millard, UT               | 0.025                | 71.16                     | 35.54                 |
| 49029              | Morgan, UT                | 0.016                | 68.51                     | 0.03                  |
| 49031              | Piute, UT                 | -0.165               | 3.02                      | 27.13                 |
| 49033              | Rich, UT                  | 0.008                | 65.68                     | 19.71                 |
| 49035              | Salt Lake, UT             | -0.084               | 21.9                      | 32.29                 |
| 49037              | San Juan, UT              | 0.344                | 98.28                     | 97.52                 |

| <b>County FIPS</b> | <b>County Description</b> | <b>DOS-SVI Index</b> | <b>DOS-SVI Percentile</b> | <b>SVI Percentile</b> |
|--------------------|---------------------------|----------------------|---------------------------|-----------------------|
| 49039              | Sanpete, UT               | 0.275                | 96.97                     | 60.19                 |
| 49041              | Sevier, UT                | -0.032               | 47.79                     | 32.61                 |
| 49043              | Summit, UT                | -0.21                | 1.02                      | 5                     |
| 49045              | Tooele, UT                | 0.044                | 76.54                     | 31.43                 |
| 49047              | Uintah, UT                | 0.084                | 84.66                     | 48.38                 |
| 49049              | Utah, UT                  | 0.107                | 87.74                     | 27.8                  |
| 49051              | Wasatch, UT               | 0.026                | 71.47                     | 6.43                  |
| 49053              | Washington, UT            | 0.136                | 90.96                     | 41.43                 |
| 49055              | Wayne, UT                 | 0.038                | 74.69                     | 29.08                 |
| 49057              | Weber, UT                 | -0.024               | 51.61                     | 42.71                 |
| 50001              | Addison, VT               | 0.002                | 63.1                      | 9.65                  |
| 50003              | Bennington, VT            | -0.025               | 50.59                     | 29.24                 |
| 50005              | Caledonia, VT             | -0.041               | 42.88                     | 26.72                 |
| 50007              | Chittenden, VT            | -0.058               | 33.62                     | 18.31                 |
| 50009              | Essex, VT                 | -0.136               | 5.95                      | 20.67                 |
| 50011              | Franklin, VT              | -0.024               | 51.16                     | 11.11                 |
| 50013              | Grand Isle, VT            | -0.064               | 30.21                     | 0.25                  |
| 50015              | Lamoille, VT              | 0.012                | 67.18                     | 13.09                 |
| 50017              | Orange, VT                | 0.007                | 65.3                      | 17.2                  |
| 50019              | Orleans, VT               | -0.02                | 53.26                     | 42.58                 |
| 50021              | Rutland, VT               | 0.155                | 92.26                     | 27.87                 |
| 50023              | Washington, VT            | -0.07                | 27.7                      | 17.52                 |
| 50025              | Windham, VT               | 0.009                | 65.93                     | 30.54                 |
| 50027              | Windsor, VT               | -0.047               | 39.26                     | 12.8                  |
| 51001              | Accomack, VA              | -0.041               | 42.47                     | 80.25                 |
| 51003              | Albemarle, VA             | -0.121               | 8.69                      | 17.32                 |
| 51005              | Alleghany, VA             | -0.106               | 13.24                     | 44.62                 |
| 51007              | Amelia, VA                | 0.005                | 64.53                     | 31.66                 |
| 51009              | Amherst, VA               | 0.022                | 70.17                     | 46.82                 |
| 51011              | Appomattox, VA            | -0.097               | 16.87                     | 36.37                 |
| 51013              | Arlington, VA             | -0.362               | 0.1                       | 14.01                 |
| 51015              | Augusta, VA               | -0.076               | 24.9                      | 14.9                  |
| 51017              | Bath, VA                  | -0.055               | 35.37                     | 24.71                 |
| 51019              | Bedford, VA               | -0.081               | 23.05                     | 9.84                  |
| 51021              | Bland, VA                 | 0.118                | 88.89                     | 34.49                 |
| 51023              | Botetourt, VA             | -0.094               | 17.89                     | 4.14                  |
| 51025              | Brunswick, VA             | 0.04                 | 75.55                     | 89.55                 |
| 51027              | Buchanan, VA              | -0.147               | 4.33                      | 75.45                 |
| 51029              | Buckingham, VA            | 0.056                | 79.31                     | 79.01                 |
| 51031              | Campbell, VA              | -0.113               | 11.02                     | 26.15                 |
| 51033              | Caroline, VA              | 0.096                | 86.18                     | 34.81                 |
| 51035              | Carroll, VA               | -0.153               | 3.79                      | 33.69                 |
| 51036              | Charles City, VA          | -0.093               | 18.05                     | 23.66                 |
| 51037              | Charlotte, VA             | -0.117               | 9.84                      | 70.57                 |
| 51041              | Chesterfield, VA          | -0.113               | 11.05                     | 17.99                 |
| 51043              | Clarke, VA                | -0.127               | 7.26                      | 11.31                 |
| 51045              | Craig, VA                 | -0.158               | 3.47                      | 7.45                  |
| 51047              | Culpeper, VA              | 0.036                | 74.28                     | 48.82                 |
| 51049              | Cumberland, VA            | -0.039               | 44.19                     | 58.31                 |
| 51051              | Dickenson, VA             | -0.128               | 7.07                      | 68.06                 |
| 51053              | Dinwiddie, VA             | -0.055               | 35.53                     | 41.82                 |
| 51057              | Essex, VA                 | -0.065               | 30.05                     | 56.34                 |
| 51059              | Fairfax, VA               | -0.166               | 2.83                      | 18.76                 |
| 51061              | Fauquier, VA              | -0.113               | 10.92                     | 2.87                  |
| 51063              | Floyd, VA                 | -0.117               | 9.81                      | 11.15                 |

| <b>County FIPS</b> | <b>County Description</b> | <b>DOS-SVI Index</b> | <b>DOS-SVI Percentile</b> | <b>SVI Percentile</b> |
|--------------------|---------------------------|----------------------|---------------------------|-----------------------|
| 51065              | Fluvanna, VA              | -0.023               | 52.12                     | 6.31                  |
| 51067              | Franklin, VA              | -0.051               | 37.92                     | 40.1                  |
| 51069              | Frederick, VA             | -0.065               | 29.64                     | 18.22                 |
| 51071              | Giles, VA                 | -0.115               | 10.22                     | 27.42                 |
| 51073              | Gloucester, VA            | -0.109               | 12.13                     | 3.66                  |
| 51075              | Goochland, VA             | -0.04                | 43.14                     | 4.59                  |
| 51077              | Grayson, VA               | -0.041               | 42.6                      | 64.59                 |
| 51079              | Greene, VA                | -0.042               | 41.9                      | 16.31                 |
| 51081              | Greensville, VA           | 0.251                | 96.4                      | 81.4                  |
| 51083              | Halifax, VA               | -0.043               | 41.26                     | 67.23                 |
| 51085              | Hanover, VA               | -0.11                | 11.78                     | 1.56                  |
| 51087              | Henrico, VA               | -0.147               | 4.49                      | 25.73                 |
| 51089              | Henry, VA                 | -0.008               | 58.77                     | 88.57                 |
| 51091              | Highland, VA              | -0.155               | 3.69                      | 6.5                   |
| 51093              | Isle of Wight, VA         | -0.03                | 48.46                     | 33.92                 |
| 51095              | James City, VA            | -0.118               | 9.42                      | 11.5                  |
| 51097              | King and Queen, VA        | -0.027               | 49.73                     | 32.45                 |
| 51099              | King George, VA           | -0.039               | 43.78                     | 1.59                  |
| 51101              | King William, VA          | -0.047               | 39.29                     | 3.57                  |
| 51103              | Lancaster, VA             | -0.071               | 27                        | 15.83                 |
| 51105              | Lee, VA                   | -0.015               | 55.78                     | 80.73                 |
| 51107              | Loudoun, VA               | -0.122               | 8.6                       | 9.04                  |
| 51109              | Louisa, VA                | -0.025               | 50.81                     | 33.25                 |
| 51111              | Lunenburg, VA             | 0.018                | 69.28                     | 86.43                 |
| 51113              | Madison, VA               | 0.064                | 81.03                     | 16.4                  |
| 51115              | Mathews, VA               | -0.115               | 10.35                     | 2.07                  |
| 51117              | Mecklenburg, VA           | -0.047               | 39.32                     | 77.68                 |
| 51119              | Middlesex, VA             | 0.02                 | 69.72                     | 20.25                 |
| 51121              | Montgomery, VA            | -0.087               | 20.66                     | 29.59                 |
| 51125              | Nelson, VA                | -0.075               | 25.6                      | 30                    |
| 51127              | New Kent, VA              | 0.017                | 69.02                     | 0.61                  |
| 51131              | Northampton, VA           | -0.077               | 24.64                     | 67.64                 |
| 51133              | Northumberland, VA        | -0.065               | 30.02                     | 12.13                 |
| 51135              | Nottoway, VA              | 0.094                | 85.9                      | 90.96                 |
| 51137              | Orange, VA                | 0.005                | 64.31                     | 46.5                  |
| 51139              | Page, VA                  | -0.071               | 27.28                     | 39.36                 |
| 51141              | Patrick, VA               | -0.044               | 41.04                     | 63.89                 |
| 51143              | Pittsylvania, VA          | -0.057               | 34                        | 64.27                 |
| 51145              | Powhatan, VA              | -0.016               | 55.46                     | 0.57                  |
| 51147              | Prince Edward, VA         | 0.069                | 81.95                     | 72.96                 |
| 51149              | Prince George, VA         | 0.065                | 81.18                     | 31.75                 |
| 51153              | Prince William, VA        | -0.105               | 13.28                     | 30.22                 |
| 51155              | Pulaski, VA               | -0.11                | 11.68                     | 48.31                 |
| 51157              | Rappahannock, VA          | -0.086               | 21.11                     | 2.13                  |
| 51159              | Richmond, VA              | 0.109                | 88.03                     | 61.43                 |
| 51161              | Roanoke, VA               | -0.151               | 3.98                      | 13.12                 |
| 51163              | Rockbridge, VA            | -0.121               | 8.79                      | 14.33                 |
| 51165              | Rockingham, VA            | -0.042               | 41.8                      | 31.97                 |
| 51167              | Russell, VA               | -0.138               | 5.76                      | 44.87                 |
| 51169              | Scott, VA                 | -0.043               | 41.52                     | 67.58                 |
| 51171              | Shenandoah, VA            | -0.099               | 15.38                     | 36.43                 |
| 51173              | Smyth, VA                 | -0.063               | 31.2                      | 75.48                 |
| 51175              | Southampton, VA           | 0.044                | 76.5                      | 47.55                 |
| 51177              | Spotsylvania, VA          | -0.062               | 31.65                     | 21.59                 |
| 51179              | Stafford, VA              | -0.085               | 21.59                     | 15.41                 |

| <b>County FIPS</b> | <b>County Description</b>    | <b>DOS-SVI Index</b> | <b>DOS-SVI Percentile</b> | <b>SVI Percentile</b> |
|--------------------|------------------------------|----------------------|---------------------------|-----------------------|
| 51181              | Surry, VA                    | 0.014                | 67.91                     | 36.59                 |
| 51183              | Sussex, VA                   | 0.293                | 97.33                     | 90.92                 |
| 51185              | Tazewell, VA                 | -0.042               | 41.67                     | 59.36                 |
| 51187              | Warren, VA                   | -0.06                | 32.51                     | 25.64                 |
| 51191              | Washington, VA               | -0.108               | 12.54                     | 36.46                 |
| 51193              | Westmoreland, VA             | -0.025               | 51                        | 29.2                  |
| 51195              | Wise, VA                     | -0.026               | 50.02                     | 85.99                 |
| 51197              | Wythe, VA                    | -0.053               | 36.58                     | 39.65                 |
| 51199              | York, VA                     | -0.097               | 16.55                     | 19.97                 |
| 51510              | Alexandria City, VA          | -0.371               | 0.03                      | 20.03                 |
| 51520              | Bristol City, VA             | -0.184               | 1.85                      | 75.1                  |
| 51530              | Buena Vista City, VA         | -0.215               | 0.83                      | 32.42                 |
| 51540              | Charlottesville City,<br>VA  | -0.107               | 12.7                      | 40.92                 |
| 51550              | Chesapeake City, VA          | -0.066               | 29.1                      | 25.92                 |
| 51570              | Colonial Heights City,<br>VA | -0.044               | 40.81                     | 56.85                 |
| 51580              | Covington City, VA           | 0.077                | 83.8                      | 46.34                 |
| 51590              | Danville City, VA            | 0.036                | 74.21                     | 95.89                 |
| 51595              | Emporia City, VA             | 0.271                | 96.85                     | 95.67                 |
| 51600              | Fairfax City, VA             | -0.112               | 11.21                     | 24.11                 |
| 51610              | Falls Church City, VA        | -0.214               | 0.86                      | 13.89                 |
| 51620              | Franklin City, VA            | -0.024               | 51.03                     | 71.75                 |
| 51630              | Fredericksburg City,<br>VA   | -0.186               | 1.75                      | 56.31                 |
| 51640              | Galax City, VA               | -0.141               | 5.09                      | 98.38                 |
| 51650              | Hampton City, VA             | -0.019               | 53.65                     | 66.75                 |
| 51660              | Harrisonburg City, VA        | -0.092               | 18.85                     | 79.3                  |
| 51670              | Hopewell City, VA            | -0.01                | 57.88                     | 94.08                 |
| 51678              | Lexington City, VA           | 0.305                | 97.58                     | 32.26                 |
| 51680              | Lynchburg City, VA           | 0.018                | 69.25                     | 73.69                 |
| 51683              | Manassas City, VA            | -0.185               | 1.82                      | 44.46                 |
| 51685              | Manassas Park City,<br>VA    | -0.273               | 0.32                      | 52.8                  |
| 51690              | Martinsville City, VA        | -0.111               | 11.43                     | 91.05                 |
| 51700              | Newport News City,<br>VA     | -0.027               | 49.83                     | 81.56                 |
| 51710              | Norfolk City, VA             | 0.037                | 74.44                     | 77.17                 |
| 51720              | Norton City, VA              | -0.058               | 33.43                     | 90.54                 |
| 51730              | Petersburg City, VA          | 0.014                | 67.81                     | 96.43                 |
| 51735              | Poquoson City, VA            | -0.084               | 21.71                     | 1.27                  |
| 51740              | Portsmouth City, VA          | 0.034                | 73.96                     | 80.06                 |
| 51750              | Radford City, VA             | -0.131               | 6.69                      | 41.24                 |
| 51760              | Richmond City, VA            | -0.097               | 16.52                     | 77.29                 |
| 51770              | Roanoke City, VA             | -0.075               | 25.28                     | 80.38                 |
| 51775              | Salem City, VA               | -0.091               | 19.01                     | 30.89                 |
| 51790              | Staunton City, VA            | -0.137               | 5.86                      | 44.49                 |
| 51800              | Suffolk City, VA             | -0.04                | 43.08                     | 34.68                 |
| 51810              | Virginia Beach City,<br>VA   | -0.115               | 10.09                     | 18.89                 |
| 51820              | Waynesboro City, VA          | -0.131               | 6.59                      | 60.13                 |
| 51830              | Williamsburg City, VA        | 0.163                | 92.87                     | 38.5                  |
| 51840              | Winchester City, VA          | -0.139               | 5.48                      | 72.2                  |
| 53001              | Adams, WA                    | 0.267                | 96.72                     | 96.21                 |
| 53003              | Asotin, WA                   | -0.052               | 37.44                     | 42.48                 |

| <b>County FIPS</b> | <b>County Description</b> | <b>DOS-SVI Index</b> | <b>DOS-SVI Percentile</b> | <b>SVI Percentile</b> |
|--------------------|---------------------------|----------------------|---------------------------|-----------------------|
| 53005              | Benton, WA                | -0.068               | 28.49                     | 51.4                  |
| 53007              | Chelan, WA                | -0.106               | 13.21                     | 67.8                  |
| 53009              | Clallam, WA               | 0.006                | 64.69                     | 61.46                 |
| 53011              | Clark, WA                 | -0.037               | 44.76                     | 28.57                 |
| 53013              | Columbia, WA              | -0.06                | 32.73                     | 31.46                 |
| 53015              | Cowlitz, WA               | -0.016               | 55.27                     | 78.85                 |
| 53017              | Douglas, WA               | 0.04                 | 75.64                     | 77.07                 |
| 53019              | Ferry, WA                 | 0.122                | 89.33                     | 82.23                 |
| 53021              | Franklin, WA              | 0.152                | 92.01                     | 86.91                 |
| 53023              | Garfield, WA              | -0.044               | 41.1                      | 18.34                 |
| 53025              | Grant, WA                 | -0.001               | 61.45                     | 84.52                 |
| 53027              | Grays Harbor, WA          | 0.002                | 63.2                      | 83.92                 |
| 53029              | Island, WA                | -0.014               | 56                        | 18.57                 |
| 53031              | Jefferson, WA             | -0.036               | 45.24                     | 24.14                 |
| 53033              | King, WA                  | -0.114               | 10.63                     | 28.54                 |
| 53035              | Kitsap, WA                | -0.047               | 39.54                     | 28.25                 |
| 53037              | Kittitas, WA              | -0.083               | 22.09                     | 28.31                 |
| 53039              | Klickitat, WA             | 0.09                 | 85.55                     | 57.23                 |
| 53041              | Lewis, WA                 | 0.002                | 62.88                     | 78.89                 |
| 53043              | Lincoln, WA               | -0.073               | 26.33                     | 19.84                 |
| 53045              | Mason, WA                 | 0.002                | 63.01                     | 63.82                 |
| 53047              | Okanogan, WA              | 0.015                | 68.39                     | 92.55                 |
| 53049              | Pacific, WA               | -0.144               | 4.78                      | 73.6                  |
| 53051              | Pend Oreille, WA          | 0.112                | 88.25                     | 53.6                  |
| 53053              | Pierce, WA                | -0.051               | 37.66                     | 48.73                 |
| 53055              | San Juan, WA              | 0.058                | 79.81                     | 8.63                  |
| 53057              | Skagit, WA                | 0.076                | 83.64                     | 53.82                 |
| 53059              | Skamania, WA              | 0.051                | 78.25                     | 21.94                 |
| 53061              | Snohomish, WA             | -0.082               | 22.48                     | 27.55                 |
| 53063              | Spokane, WA               | -0.103               | 14.2                      | 48.25                 |
| 53065              | Stevens, WA               | -0.002               | 61.25                     | 46.15                 |
| 53067              | Thurston, WA              | -0.04                | 43.23                     | 32.99                 |
| 53069              | Wahkiakum, WA             | -0.079               | 23.59                     | 18.09                 |
| 53071              | Walla Walla, WA           | 0.015                | 68.23                     | 68.31                 |
| 53073              | Whatcom, WA               | -0.035               | 46                        | 45.41                 |
| 53075              | Whitman, WA               | -0.016               | 55.01                     | 51.08                 |
| 53077              | Yakima, WA                | 0.094                | 85.93                     | 92.77                 |
| 54001              | Barbour, WV               | 0.001                | 62.62                     | 65.13                 |
| 54003              | Berkeley, WV              | -0.002               | 61.32                     | 44.33                 |
| 54005              | Boone, WV                 | -0.023               | 51.96                     | 70.41                 |
| 54007              | Braxton, WV               | 0.103                | 87.07                     | 66.46                 |
| 54009              | Brooke, WV                | 0.022                | 70.11                     | 33.06                 |
| 54011              | Cabell, WV                | -0.102               | 14.55                     | 62.45                 |
| 54013              | Calhoun, WV               | -0.018               | 54.09                     | 52.39                 |
| 54015              | Clay, WV                  | -0.094               | 17.61                     | 68.85                 |
| 54017              | Doddridge, WV             | -0.013               | 56.45                     | 36.08                 |
| 54019              | Fayette, WV               | -0.057               | 34.42                     | 76.4                  |
| 54021              | Gilmer, WV                | 0.114                | 88.44                     | 75.64                 |
| 54023              | Grant, WV                 | -0.085               | 21.33                     | 36.75                 |
| 54025              | Greenbrier, WV            | -0.046               | 39.89                     | 55.57                 |
| 54027              | Hampshire, WV             | -0.059               | 33.14                     | 64.33                 |
| 54029              | Hancock, WV               | -0.021               | 52.59                     | 40.51                 |
| 54031              | Hardy, WV                 | -0.204               | 1.15                      | 28.5                  |
| 54033              | Harrison, WV              | -0.011               | 57.5                      | 40.89                 |
| 54035              | Jackson, WV               | -0.017               | 54.89                     | 25.29                 |

| <b>County FIPS</b> | <b>County Description</b> | <b>DOS-SVI Index</b> | <b>DOS-SVI Percentile</b> | <b>SVI Percentile</b> |
|--------------------|---------------------------|----------------------|---------------------------|-----------------------|
| 54037              | Jefferson, WV             | 0                    | 62.4                      | 22.55                 |
| 54039              | Kanawha, WV               | -0.058               | 33.52                     | 56.56                 |
| 54041              | Lewis, WV                 | -0.038               | 44.38                     | 67.61                 |
| 54043              | Lincoln, WV               | -0.021               | 53.01                     | 60.57                 |
| 54045              | Logan, WV                 | 0.004                | 63.87                     | 74.71                 |
| 54047              | McDowell, WV              | -0.006               | 59.82                     | 90.29                 |
| 54049              | Marion, WV                | -0.014               | 56.26                     | 49.39                 |
| 54051              | Marshall, WV              | -0.035               | 46.2                      | 21.53                 |
| 54053              | Mason, WV                 | 0.026                | 71.41                     | 54.97                 |
| 54055              | Mercer, WV                | -0.117               | 9.77                      | 80.89                 |
| 54057              | Mineral, WV               | -0.067               | 28.84                     | 59.33                 |
| 54059              | Mingo, WV                 | 0.014                | 67.88                     | 78.5                  |
| 54061              | Monongalia, WV            | 0.014                | 68                        | 41.11                 |
| 54063              | Monroe, WV                | -0.088               | 20.54                     | 46.62                 |
| 54065              | Morgan, WV                | 0.051                | 78.32                     | 17.64                 |
| 54067              | Nicholas, WV              | 0.005                | 64.28                     | 54.11                 |
| 54069              | Ohio, WV                  | 0.006                | 64.88                     | 31.08                 |
| 54071              | Pendleton, WV             | -0.079               | 23.4                      | 35.8                  |
| 54073              | Pleasants, WV             | 0.039                | 75.36                     | 44.68                 |
| 54075              | Pocahontas, WV            | -0.243               | 0.45                      | 49.71                 |
| 54077              | Preston, WV               | 0.085                | 84.78                     | 57.32                 |
| 54079              | Putnam, WV                | -0.067               | 28.78                     | 4.08                  |
| 54081              | Raleigh, WV               | -0.025               | 50.94                     | 76.85                 |
| 54083              | Randolph, WV              | 0.008                | 65.62                     | 58.06                 |
| 54085              | Ritchie, WV               | -0.087               | 20.76                     | 36.4                  |
| 54087              | Roane, WV                 | -0.051               | 37.63                     | 64.65                 |
| 54089              | Summers, WV               | 0.031                | 72.88                     | 82.9                  |
| 54091              | Taylor, WV                | -0.056               | 34.51                     | 49.49                 |
| 54093              | Tucker, WV                | -0.065               | 29.58                     | 36.72                 |
| 54095              | Tyler, WV                 | -0.075               | 25.53                     | 22.13                 |
| 54097              | Upshur, WV                | 0.028                | 71.95                     | 69.11                 |
| 54099              | Wayne, WV                 | -0.09                | 19.36                     | 60.06                 |
| 54101              | Webster, WV               | -0.033               | 46.83                     | 74.87                 |
| 54103              | Wetzel, WV                | -0.077               | 24.45                     | 47.52                 |
| 54105              | Wirt, WV                  | -0.169               | 2.61                      | 37.48                 |
| 54107              | Wood, WV                  | -0.056               | 34.54                     | 37.23                 |
| 54109              | Wyoming, WV               | 0.013                | 67.59                     | 64.43                 |
| 55001              | Adams, WI                 | -0.007               | 59.12                     | 56.85                 |
| 55003              | Ashland, WI               | 0.02                 | 69.63                     | 55                    |
| 55005              | Barron, WI                | -0.021               | 52.82                     | 32.71                 |
| 55007              | Bayfield, WI              | -0.016               | 55.49                     | 9.9                   |
| 55009              | Brown, WI                 | -0.093               | 18.02                     | 32.99                 |
| 55011              | Buffalo, WI               | -0.103               | 14.17                     | 5.76                  |
| 55013              | Burnett, WI               | -0.05                | 38.08                     | 16.72                 |
| 55015              | Calumet, WI               | -0.085               | 21.43                     | 1.82                  |
| 55017              | Chippewa, WI              | -0.037               | 44.67                     | 21.05                 |
| 55019              | Clark, WI                 | 0.076                | 83.51                     | 53.5                  |
| 55021              | Columbia, WI              | -0.067               | 28.97                     | 12.04                 |
| 55023              | Crawford, WI              | -0.01                | 57.75                     | 39.71                 |
| 55025              | Dane, WI                  | -0.182               | 1.88                      | 16.88                 |
| 55027              | Dodge, WI                 | -0.056               | 34.67                     | 20.19                 |
| 55029              | Door, WI                  | -0.097               | 16.78                     | 5.57                  |
| 55031              | Douglas, WI               | -0.031               | 48.17                     | 27.48                 |
| 55033              | Dunn, WI                  | 0.016                | 68.58                     | 18.47                 |
| 55035              | Eau Claire, WI            | -0.065               | 29.86                     | 21.75                 |

| <b>County FIPS</b> | <b>County Description</b> | <b>DOS-SVI Index</b> | <b>DOS-SVI Percentile</b> | <b>SVI Percentile</b> |
|--------------------|---------------------------|----------------------|---------------------------|-----------------------|
| 55037              | Florence, WI              | 0.046                | 77.27                     | 14.52                 |
| 55039              | Fond du Lac, WI           | -0.065               | 29.89                     | 20.38                 |
| 55041              | Forest, WI                | 0                    | 62.08                     | 57.74                 |
| 55043              | Grant, WI                 | 0.001                | 62.56                     | 19.39                 |
| 55045              | Green, WI                 | -0.11                | 11.81                     | 5.29                  |
| 55047              | Green Lake, WI            | -0.04                | 43.01                     | 28.69                 |
| 55049              | Iowa, WI                  | -0.065               | 29.83                     | 1.31                  |
| 55051              | Iron, WI                  | 0.024                | 70.87                     | 36.02                 |
| 55053              | Jackson, WI               | 0.084                | 84.62                     | 50.03                 |
| 55055              | Jefferson, WI             | -0.047               | 39.16                     | 18.54                 |
| 55057              | Juneau, WI                | -0.006               | 59.63                     | 37.8                  |
| 55059              | Kenosha, WI               | -0.075               | 25.57                     | 51.11                 |
| 55061              | Kewaunee, WI              | -0.056               | 34.45                     | 5.86                  |
| 55063              | La Crosse, WI             | -0.099               | 15.57                     | 20.89                 |
| 55065              | Lafayette, WI             | -0.052               | 36.71                     | 15.96                 |
| 55067              | Langlade, WI              | -0.078               | 23.94                     | 35.35                 |
| 55069              | Lincoln, WI               | -0.063               | 31.3                      | 10.13                 |
| 55071              | Manitowoc, WI             | -0.1                 | 15.28                     | 16.21                 |
| 55073              | Marathon, WI              | -0.057               | 33.91                     | 14.43                 |
| 55075              | Marinette, WI             | -0.057               | 34.13                     | 29.71                 |
| 55077              | Marquette, WI             | -0.038               | 44.41                     | 25.96                 |
| 55078              | Menominee, WI             | 0.414                | 98.66                     | 76.72                 |
| 55079              | Milwaukee, WI             | -0.084               | 21.65                     | 80.61                 |
| 55081              | Monroe, WI                | -0.035               | 45.78                     | 46.21                 |
| 55083              | Oconto, WI                | -0.064               | 30.12                     | 6.4                   |
| 55085              | Oneida, WI                | -0.096               | 16.97                     | 1.4                   |
| 55087              | Outagamie, WI             | -0.102               | 14.68                     | 9.78                  |
| 55089              | Ozaukee, WI               | -0.098               | 15.89                     | 1.34                  |
| 55091              | Pepin, WI                 | -0.09                | 19.17                     | 10.19                 |
| 55093              | Pierce, WI                | -0.068               | 28.34                     | 8.06                  |
| 55095              | Polk, WI                  | -0.074               | 26.01                     | 8.73                  |
| 55097              | Portage, WI               | -0.05                | 37.98                     | 16.53                 |
| 55099              | Price, WI                 | -0.05                | 38.3                      | 16.02                 |
| 55101              | Racine, WI                | -0.107               | 12.77                     | 45.51                 |
| 55103              | Richland, WI              | -0.056               | 34.83                     | 30.73                 |
| 55105              | Rock, WI                  | -0.083               | 22.25                     | 45.61                 |
| 55107              | Rusk, WI                  | -0.063               | 30.98                     | 34.65                 |
| 55109              | St. Croix, WI             | -0.083               | 22.19                     | 1.46                  |
| 55111              | Sauk, WI                  | -0.094               | 17.8                      | 23.44                 |
| 55113              | Sawyer, WI                | 0.05                 | 78.16                     | 42.68                 |
| 55115              | Shawano, WI               | -0.061               | 31.87                     | 13.82                 |
| 55117              | Sheboygan, WI             | -0.042               | 42.15                     | 22.45                 |
| 55119              | Taylor, WI                | -0.032               | 47.41                     | 20                    |
| 55121              | Trempealeau, WI           | -0.032               | 47.72                     | 28.12                 |
| 55123              | Vernon, WI                | 0.062                | 80.58                     | 38.34                 |
| 55125              | Vilas, WI                 | -0.038               | 44.6                      | 13.95                 |
| 55127              | Walworth, WI              | -0.084               | 21.62                     | 26.88                 |
| 55129              | Washburn, WI              | -0.06                | 32.28                     | 10.8                  |
| 55131              | Washington, WI            | -0.14                | 5.35                      | 0.99                  |
| 55133              | Waukesha, WI              | -0.131               | 6.65                      | 1.94                  |
| 55135              | Waupaca, WI               | -0.1                 | 15.03                     | 18.15                 |
| 55137              | Waushara, WI              | -0.031               | 48.23                     | 36.53                 |
| 55139              | Winnebago, WI             | -0.124               | 7.99                      | 16.08                 |
| 55141              | Wood, WI                  | -0.128               | 7.13                      | 15.35                 |
| 56001              | Albany, WY                | -0.041               | 42.57                     | 24.94                 |

| <b>County FIPS</b> | <b>County Description</b> | <b>DOS-SVI Index</b> | <b>DOS-SVI Percentile</b> | <b>SVI Percentile</b> |
|--------------------|---------------------------|----------------------|---------------------------|-----------------------|
| 56003              | Big Horn, WY              | 0.026                | 71.44                     | 39.55                 |
| 56005              | Campbell, WY              | 0.002                | 62.94                     | 33.15                 |
| 56007              | Carbon, WY                | 0.032                | 73.29                     | 50.29                 |
| 56009              | Converse, WY              | -0.032               | 47.6                      | 20.48                 |
| 56011              | Crook, WY                 | 0.072                | 82.52                     | 3.28                  |
| 56013              | Fremont, WY               | 0.143                | 91.47                     | 56.24                 |
| 56015              | Goshen, WY                | -0.072               | 26.55                     | 32.64                 |
| 56017              | Hot Springs, WY           | -0.057               | 34.38                     | 12.29                 |
| 56019              | Johnson, WY               | -0.024               | 51.42                     | 17.74                 |
| 56021              | Laramie, WY               | -0.038               | 44.32                     | 26.97                 |
| 56023              | Lincoln, WY               | 0.045                | 76.98                     | 8.09                  |
| 56025              | Natrona, WY               | -0.094               | 17.86                     | 29.52                 |
| 56027              | Niobrara, WY              | 0.002                | 63.26                     | 33.6                  |
| 56029              | Park, WY                  | -0.026               | 50.24                     | 6.59                  |
| 56031              | Platte, WY                | -0.13                | 6.84                      | 9.52                  |
| 56033              | Sheridan, WY              | -0.047               | 39.35                     | 8.95                  |
| 56035              | Sublette, WY              | -0.082               | 22.8                      | 2.93                  |
| 56037              | Sweetwater, WY            | -0.059               | 33.17                     | 37.01                 |
| 56039              | Teton, WY                 | 0.188                | 94.27                     | 11.27                 |
| 56041              | Uinta, WY                 | 0.038                | 74.75                     | 45.22                 |
| 56043              | Washakie, WY              | 0.03                 | 72.53                     | 37.32                 |
| 56045              | Weston, WY                | 0.004                | 63.93                     | 34.75                 |



Appendix Table 7: PR DOS-SVI and CDC SVI Percentiles by County

| County FIPS | County Description | DOS-SVI Index | DOS-SVI Percentile | SVI Percentile |
|-------------|--------------------|---------------|--------------------|----------------|
| 01001       | Autauga, AL        | -0.026        | 52.12              | 43.54          |
| 01003       | Baldwin, AL        | -0.143        | 41.71              | 21.62          |
| 01005       | Barbour, AL        | 0.964         | 97.17              | 99.59          |
| 01007       | Bibb, AL           | 0.471         | 85.7               | 60.03          |
| 01009       | Blount, AL         | 0.026         | 56.83              | 42.42          |
| 01011       | Bullock, AL        | 1.083         | 98.19              | 88.98          |
| 01013       | Butler, AL         | 0.461         | 85.04              | 86.53          |
| 01015       | Calhoun, AL        | 0.439         | 84.05              | 82.52          |
| 01017       | Chambers, AL       | 0.132         | 65.36              | 73.82          |
| 01019       | Cherokee, AL       | 0.369         | 80.8               | 45.16          |
| 01021       | Chilton, AL        | 0.327         | 78.1               | 76.02          |
| 01023       | Choctaw, AL        | 1.012         | 97.55              | 87.48          |
| 01025       | Clarke, AL         | 0.954         | 97.04              | 84.71          |
| 01027       | Clay, AL           | 0.353         | 79.69              | 56.4           |
| 01029       | Cleburne, AL       | 0.577         | 89.72              | 54.17          |
| 01031       | Coffee, AL         | 0.041         | 58.74              | 54.08          |
| 01033       | Colbert, AL        | 0.153         | 66.89              | 42.74          |
| 01035       | Conecuh, AL        | 1.032         | 97.74              | 80.86          |
| 01037       | Coosa, AL          | 0.658         | 92.39              | 52.61          |
| 01039       | Covington, AL      | 0.474         | 85.74              | 77.23          |
| 01041       | Crenshaw, AL       | 0.392         | 81.76              | 68.73          |
| 01043       | Cullman, AL        | 0.17          | 68.29              | 51.82          |
| 01045       | Dale, AL           | 0.444         | 84.3               | 75.99          |
| 01047       | Dallas, AL         | 0.762         | 94.78              | 94.9           |
| 01049       | DeKalb, AL         | 0.158         | 67.33              | 80.22          |
| 01051       | Elmore, AL         | 0.104         | 63.58              | 54.01          |
| 01053       | Escambia, AL       | 0.925         | 96.62              | 85.57          |
| 01055       | Etowah, AL         | 0.212         | 71.16              | 65.64          |
| 01057       | Fayette, AL        | 0.534         | 88.22              | 70.38          |
| 01059       | Franklin, AL       | 0.168         | 68.19              | 84.17          |
| 01061       | Geneva, AL         | 0.669         | 92.58              | 79.55          |
| 01063       | Greene, AL         | 1.652         | 99.94              | 98.54          |
| 01065       | Hale, AL           | 0.895         | 96.34              | 95.99          |
| 01067       | Henry, AL          | 0.416         | 83.06              | 55.19          |
| 01069       | Houston, AL        | 0.213         | 71.25              | 68.38          |
| 01071       | Jackson, AL        | 0.273         | 75.29              | 57.26          |
| 01073       | Jefferson, AL      | 0.061         | 60.11              | 66.21          |
| 01075       | Lamar, AL          | 0.498         | 86.56              | 62.64          |
| 01077       | Lauderdale, AL     | -0.044        | 50.52              | 44.68          |
| 01079       | Lawrence, AL       | 0.327         | 78.16              | 49.52          |
| 01081       | Lee, AL            | 0.089         | 62.56              | 66.02          |
| 01083       | Limestone, AL      | 0.097         | 63.2               | 52.96          |
| 01085       | Lowndes, AL        | 1.139         | 98.53              | 91.88          |
| 01087       | Macon, AL          | 1.01          | 97.48              | 89.71          |
| 01089       | Madison, AL        | -0.149        | 41.04              | 30.76          |
| 01091       | Marengo, AL        | 0.767         | 94.87              | 76.21          |
| 01093       | Marion, AL         | 0.422         | 83.29              | 67.1           |
| 01095       | Marshall, AL       | 0.033         | 57.53              | 72.61          |
| 01097       | Mobile, AL         | 0.041         | 58.8               | 75.32          |
| 01099       | Monroe, AL         | 1.119         | 98.38              | 74.81          |
| 01101       | Montgomery, AL     | 0.201         | 70.49              | 84.27          |
| 01103       | Morgan, AL         | -0.014        | 53.2               | 68.95          |
| 01105       | Perry, AL          | 1.301         | 99.36              | 99.49          |
| 01107       | Pickens, AL        | 0.932         | 96.72              | 92.07          |

| <b>County FIPS</b> | <b>County Description</b>        | <b>DOS-SVI Index</b> | <b>DOS-SVI Percentile</b> | <b>SVI Percentile</b> |
|--------------------|----------------------------------|----------------------|---------------------------|-----------------------|
| 01109              | Pike, AL                         | 0.652                | 92.1                      | 90.16                 |
| 01111              | Randolph, AL                     | 0.112                | 64.25                     | 71.91                 |
| 01113              | Russell, AL                      | 0.268                | 75.04                     | 91.15                 |
| 01115              | St. Clair, AL                    | 0.134                | 65.55                     | 36.56                 |
| 01117              | Shelby, AL                       | -0.416               | 16.05                     | 11.69                 |
| 01119              | Sumter, AL                       | 1.245                | 99.14                     | 95.57                 |
| 01121              | Talladega, AL                    | 0.582                | 89.88                     | 87.36                 |
| 01123              | Tallapoosa, AL                   | 0.522                | 87.78                     | 88.63                 |
| 01125              | Tuscaloosa, AL                   | 0.099                | 63.26                     | 62.55                 |
| 01127              | Walker, AL                       | 0.623                | 91.05                     | 74.52                 |
| 01129              | Washington, AL                   | 0.728                | 94.21                     | 73.03                 |
| 01131              | Wilcox, AL                       | 1.313                | 99.39                     | 92.8                  |
| 01133              | Winston, AL                      | 0.575                | 89.65                     | 70.25                 |
| 02013              | Aleutians East, AK               | -0.174               | 39.03                     | 58.03                 |
| 02016              | Aleutians West, AK               | -0.761               | 1.47                      | 49.27                 |
| 02020              | Anchorage, AK                    | -0.495               | 10.41                     | 46.02                 |
| 02050              | Bethel, AK                       | -1.478               | 0.16                      | 97.48                 |
| 02060              | Bristol Bay, AK                  | -0.347               | 22.38                     | 35.25                 |
| 02068              | Denali, AK                       | 0.038                | 58.36                     | 10.1                  |
| 02070              | Dillingham, AK                   | -1.186               | 0.19                      | 86.82                 |
| 02090              | Fairbanks North Star,<br>AK      | -0.477               | 11.72                     | 34.46                 |
| 02100              | Haines, AK                       | -0.775               | 1.27                      | 20.7                  |
| 02105              | Hoonah-Angoon, AK                | -0.101               | 45.62                     | 41.78                 |
| 02110              | Juneau City and<br>Borough, AK   | -0.49                | 10.82                     | 29.87                 |
| 02122              | Kenai Peninsula, AK              | -0.254               | 30.95                     | 40.73                 |
| 02130              | Ketchikan Gateway,<br>AK         | -0.352               | 22.09                     | 55.48                 |
| 02150              | Kodiak Island, AK                | -0.653               | 3.06                      | 70.06                 |
| 02158              | Kusilvak, AK                     | -1.765               | 0.06                      | 93.34                 |
| 02164              | Lake and Peninsula, AK           | -0.42                | 15.76                     | 79.78                 |
| 02170              | Matanuska-Susitna, AK            | -0.298               | 27.19                     | 31.72                 |
| 02180              | Nome, AK                         | -1.533               | 0.13                      | 92.99                 |
| 02185              | North Slope, AK                  | -1.844               | 0.03                      | 73.44                 |
| 02188              | Northwest Arctic, AK             | -1.728               | 0.1                       | 93.54                 |
| 02195              | Petersburg, AK                   | -0.384               | 19.04                     | 66.5                  |
| 02198              | Prince of Wales-Hyder,<br>AK     | 0.321                | 77.87                     | 76.62                 |
| 02220              | Sitka City and Borough,<br>AK    | -0.538               | 8.21                      | 40.22                 |
| 02230              | Skagway, AK                      | -0.323               | 24.45                     | 16.85                 |
| 02240              | Southeast Fairbanks,<br>AK       | -0.285               | 28.49                     | 58.38                 |
| 02261              | Valdez-Cordova, AK               | -0.33                | 24                        | 27.04                 |
| 02275              | Wrangell City and<br>Borough, AK | -0.131               | 42.85                     | 56.18                 |
| 02282              | Yakutat City and<br>Borough, AK  | -0.632               | 3.63                      | 58.73                 |
| 02290              | Yukon-Koyukuk, AK                | -0.455               | 13.24                     | 88.12                 |
| 04001              | Apache, AZ                       | 0.445                | 84.37                     | 98.85                 |
| 04003              | Cochise, AZ                      | 0.366                | 80.52                     | 90.64                 |
| 04005              | Coconino, AZ                     | 0.039                | 58.61                     | 71.31                 |
| 04007              | Gila, AZ                         | 0.681                | 92.96                     | 89.9                  |
| 04009              | Graham, AZ                       | 0.299                | 76.86                     | 96.4                  |

| <b>County FIPS</b> | <b>County Description</b> | <b>DOS-SVI Index</b> | <b>DOS-SVI Percentile</b> | <b>SVI Percentile</b> |
|--------------------|---------------------------|----------------------|---------------------------|-----------------------|
| 04011              | Greenlee, AZ              | 0.038                | 58.45                     | 61.88                 |
| 04012              | La Paz, AZ                | 1.013                | 97.58                     | 92.36                 |
| 04013              | Maricopa, AZ              | -0.291               | 27.79                     | 63.54                 |
| 04015              | Mohave, AZ                | 0.626                | 91.25                     | 86.24                 |
| 04017              | Navajo, AZ                | 0.65                 | 91.98                     | 99.55                 |
| 04019              | Pima, AZ                  | 0.136                | 65.78                     | 88.28                 |
| 04021              | Pinal, AZ                 | 0.219                | 71.7                      | 85.92                 |
| 04023              | Santa Cruz, AZ            | 0.28                 | 75.68                     | 93.18                 |
| 04025              | Yavapai, AZ               | 0.298                | 76.82                     | 52.1                  |
| 04027              | Yuma, AZ                  | 0.493                | 86.37                     | 98.95                 |
| 05001              | Arkansas, AR              | 0.291                | 76.41                     | 77.87                 |
| 05003              | Ashley, AR                | 0.433                | 83.54                     | 85.76                 |
| 05005              | Baxter, AR                | 0.14                 | 66.03                     | 27.93                 |
| 05007              | Benton, AR                | -0.652               | 3.09                      | 27.07                 |
| 05009              | Boone, AR                 | -0.106               | 45.11                     | 43.79                 |
| 05011              | Bradley, AR               | 0.41                 | 82.78                     | 98.03                 |
| 05013              | Calhoun, AR               | 0.541                | 88.57                     | 54.81                 |
| 05015              | Carroll, AR               | -0.134               | 42.6                      | 59.52                 |
| 05017              | Chicot, AR                | 0.725                | 94.08                     | 99.68                 |
| 05019              | Clark, AR                 | 0.163                | 67.75                     | 78.92                 |
| 05021              | Clay, AR                  | 0.193                | 70.04                     | 65.29                 |
| 05023              | Cleburne, AR              | 0.202                | 70.55                     | 20.83                 |
| 05025              | Cleveland, AR             | 0.34                 | 78.89                     | 56.43                 |
| 05027              | Columbia, AR              | 0.616                | 90.8                      | 93.98                 |
| 05029              | Conway, AR                | 0.229                | 72.36                     | 75.89                 |
| 05031              | Craighead, AR             | -0.109               | 44.76                     | 80.41                 |
| 05033              | Crawford, AR              | -0.02                | 52.59                     | 61.05                 |
| 05035              | Crittenden, AR            | 0.207                | 70.9                      | 93.41                 |
| 05037              | Cross, AR                 | 0.111                | 64.06                     | 70.13                 |
| 05039              | Dallas, AR                | 0.369                | 80.74                     | 87.77                 |
| 05041              | Desha, AR                 | 0.631                | 91.44                     | 95.96                 |
| 05043              | Drew, AR                  | 0.476                | 85.8                      | 80.1                  |
| 05045              | Faulkner, AR              | -0.114               | 44.32                     | 47.74                 |
| 05047              | Franklin, AR              | 0.021                | 56.41                     | 59.43                 |
| 05049              | Fulton, AR                | 0.463                | 85.16                     | 66.88                 |
| 05051              | Garland, AR               | 0.257                | 74.15                     | 82.8                  |
| 05053              | Grant, AR                 | 0.252                | 73.86                     | 35.41                 |
| 05055              | Greene, AR                | 0.153                | 66.86                     | 58.34                 |
| 05057              | Hempstead, AR             | 0.225                | 72.08                     | 94.68                 |
| 05059              | Hot Spring, AR            | 0.489                | 86.28                     | 81.88                 |
| 05061              | Howard, AR                | 0.11                 | 64.02                     | 90.45                 |
| 05063              | Independence, AR          | 0.072                | 61.03                     | 75.25                 |
| 05065              | Izard, AR                 | 0.669                | 92.55                     | 56.97                 |
| 05067              | Jackson, AR               | 0.504                | 86.88                     | 76.5                  |
| 05069              | Jefferson, AR             | 0.559                | 89.17                     | 94.36                 |
| 05071              | Johnson, AR               | 0.117                | 64.72                     | 87.68                 |
| 05073              | Lafayette, AR             | 0.502                | 86.76                     | 78.98                 |
| 05075              | Lawrence, AR              | 0.309                | 77.52                     | 64.71                 |
| 05077              | Lee, AR                   | 1.251                | 99.2                      | 96.56                 |
| 05079              | Lincoln, AR               | 0.619                | 90.96                     | 81.34                 |
| 05081              | Little River, AR          | 0.532                | 88.06                     | 63.06                 |
| 05083              | Logan, AR                 | 0.377                | 81.15                     | 80.45                 |
| 05085              | Lonoke, AR                | -0.302               | 26.87                     | 33.09                 |
| 05087              | Madison, AR               | 0.168                | 68.07                     | 65.35                 |
| 05089              | Marion, AR                | 0.55                 | 88.76                     | 51.75                 |

| <b>County FIPS</b> | <b>County Description</b> | <b>DOS-SVI Index</b> | <b>DOS-SVI Percentile</b> | <b>SVI Percentile</b> |
|--------------------|---------------------------|----------------------|---------------------------|-----------------------|
| 05091              | Miller, AR                | 0.248                | 73.58                     | 91.24                 |
| 05093              | Mississippi, AR           | 0.267                | 74.98                     | 95.54                 |
| 05095              | Monroe, AR                | 0.522                | 87.81                     | 85.16                 |
| 05097              | Montgomery, AR            | 0.578                | 89.75                     | 70                    |
| 05099              | Nevada, AR                | 0.404                | 82.46                     | 88.41                 |
| 05101              | Newton, AR                | 0.055                | 59.66                     | 28.15                 |
| 05103              | Ouachita, AR              | 0.3                  | 77.01                     | 86.56                 |
| 05105              | Perry, AR                 | 0.309                | 77.49                     | 63.6                  |
| 05107              | Phillips, AR              | 0.665                | 92.49                     | 92.39                 |
| 05109              | Pike, AR                  | 0.28                 | 75.71                     | 71.24                 |
| 05111              | Poinsett, AR              | 0.113                | 64.44                     | 82.68                 |
| 05113              | Polk, AR                  | 0.439                | 83.92                     | 89.49                 |
| 05115              | Pope, AR                  | 0.1                  | 63.42                     | 79.36                 |
| 05117              | Prairie, AR               | 0.305                | 77.33                     | 65.48                 |
| 05119              | Pulaski, AR               | -0.097               | 46.16                     | 62.87                 |
| 05121              | Randolph, AR              | 0.038                | 58.39                     | 71.66                 |
| 05123              | St. Francis, AR           | 0.558                | 89.11                     | 96.91                 |
| 05125              | Saline, AR                | -0.24                | 32.54                     | 33.25                 |
| 05127              | Scott, AR                 | 0.5                  | 86.69                     | 88.73                 |
| 05129              | Searcy, AR                | 0.204                | 70.65                     | 43.76                 |
| 05131              | Sebastian, AR             | -0.046               | 50.17                     | 83.28                 |
| 05133              | Sevier, AR                | -0.036               | 51.19                     | 76.75                 |
| 05135              | Sharp, AR                 | 0.317                | 77.78                     | 61.91                 |
| 05137              | Stone, AR                 | 0.667                | 92.52                     | 51.02                 |
| 05139              | Union, AR                 | 0.204                | 70.71                     | 80.54                 |
| 05141              | Van Buren, AR             | 0.48                 | 86.02                     | 72.26                 |
| 05143              | Washington, AR            | -0.313               | 25.69                     | 67.45                 |
| 05145              | White, AR                 | 0.071                | 60.87                     | 74.46                 |
| 05147              | Woodruff, AR              | 0.625                | 91.12                     | 84.9                  |
| 05149              | Yell, AR                  | 0.022                | 56.51                     | 87.83                 |
| 06001              | Alameda, CA               | -0.486               | 11.18                     | 47.01                 |
| 06003              | Alpine, CA                | 0.964                | 97.1                      | 72.87                 |
| 06005              | Amador, CA                | 0.252                | 73.8                      | 53.34                 |
| 06007              | Butte, CA                 | 0.281                | 75.84                     | 80.64                 |
| 06009              | Calaveras, CA             | 0.157                | 67.27                     | 23.5                  |
| 06011              | Colusa, CA                | -0.219               | 34.42                     | 74.36                 |
| 06013              | Contra Costa, CA          | -0.377               | 19.74                     | 40.57                 |
| 06015              | Del Norte, CA             | 0.444                | 84.27                     | 97.13                 |
| 06017              | El Dorado, CA             | -0.246               | 31.8                      | 18.38                 |
| 06019              | Fresno, CA                | 0.007                | 55.52                     | 96.11                 |
| 06021              | Glenn, CA                 | 0.17                 | 68.32                     | 88.95                 |
| 06023              | Humboldt, CA              | 0.15                 | 66.64                     | 76.05                 |
| 06025              | Imperial, CA              | 0.657                | 92.33                     | 99.78                 |
| 06027              | Inyo, CA                  | 0.017                | 56.1                      | 57.01                 |
| 06029              | Kern, CA                  | 0.038                | 58.26                     | 96.59                 |
| 06031              | Kings, CA                 | 0.045                | 58.93                     | 97.07                 |
| 06033              | Lake, CA                  | 0.557                | 89.02                     | 91.78                 |
| 06035              | Lassen, CA                | 0.446                | 84.43                     | 59.97                 |
| 06037              | Los Angeles, CA           | -0.267               | 29.83                     | 76.82                 |
| 06039              | Madera, CA                | 0.037                | 58.23                     | 95.41                 |
| 06041              | Marin, CA                 | -0.681               | 2.36                      | 27.01                 |
| 06043              | Mariposa, CA              | 0.454                | 84.75                     | 52.93                 |
| 06045              | Mendocino, CA             | 0.195                | 70.2                      | 88.18                 |
| 06047              | Merced, CA                | 0.266                | 74.88                     | 97.17                 |
| 06049              | Modoc, CA                 | 0.305                | 77.27                     | 75.16                 |

| <b>County FIPS</b> | <b>County Description</b> | <b>DOS-SVI Index</b> | <b>DOS-SVI Percentile</b> | <b>SVI Percentile</b> |
|--------------------|---------------------------|----------------------|---------------------------|-----------------------|
| 06051              | Mono, CA                  | -0.319               | 25.06                     | 14.08                 |
| 06053              | Monterey, CA              | -0.473               | 12.07                     | 79.9                  |
| 06055              | Napa, CA                  | -0.378               | 19.71                     | 50.51                 |
| 06057              | Nevada, CA                | -0.073               | 48.07                     | 20.45                 |
| 06059              | Orange, CA                | -0.464               | 12.64                     | 41.91                 |
| 06061              | Placer, CA                | -0.467               | 12.42                     | 15.19                 |
| 06063              | Plumas, CA                | 0.137                | 65.87                     | 26.53                 |
| 06065              | Riverside, CA             | -0.016               | 52.95                     | 79.39                 |
| 06067              | Sacramento, CA            | -0.14                | 41.96                     | 73.38                 |
| 06069              | San Benito, CA            | -0.324               | 24.32                     | 52.45                 |
| 06071              | San Bernardino, CA        | -0.065               | 48.84                     | 90.1                  |
| 06073              | San Diego, CA             | -0.266               | 29.96                     | 55.96                 |
| 06075              | San Francisco, CA         | -0.65                | 3.18                      | 39.11                 |
| 06077              | San Joaquin, CA           | -0.082               | 47.28                     | 88.92                 |
| 06079              | San Luis Obispo, CA       | -0.176               | 38.84                     | 37.39                 |
| 06081              | San Mateo, CA             | -0.648               | 3.28                      | 26.5                  |
| 06083              | Santa Barbara, CA         | -0.352               | 22.19                     | 71.11                 |
| 06085              | Santa Clara, CA           | -0.57                | 6.37                      | 35.57                 |
| 06087              | Santa Cruz, CA            | -0.243               | 32.16                     | 54.3                  |
| 06089              | Shasta, CA                | -0.008               | 53.96                     | 70.22                 |
| 06091              | Sierra, CA                | -0.111               | 44.57                     | 4.52                  |
| 06093              | Siskiyou, CA              | 0.231                | 72.59                     | 72.23                 |
| 06095              | Solano, CA                | -0.177               | 38.75                     | 59.11                 |
| 06097              | Sonoma, CA                | -0.331               | 23.85                     | 40.35                 |
| 06099              | Stanislaus, CA            | 0.06                 | 60.01                     | 86.75                 |
| 06101              | Sutter, CA                | 0.077                | 61.29                     | 88.22                 |
| 06103              | Tehama, CA                | 0.359                | 80.13                     | 96.24                 |
| 06105              | Trinity, CA               | 0.571                | 89.46                     | 74.11                 |
| 06107              | Tulare, CA                | 0.054                | 59.63                     | 94.17                 |
| 06109              | Tuolumne, CA              | 0.139                | 66                        | 46.88                 |
| 06111              | Ventura, CA               | -0.344               | 22.86                     | 48.28                 |
| 06113              | Yolo, CA                  | -0.143               | 41.67                     | 67.68                 |
| 06115              | Yuba, CA                  | -0.056               | 49.51                     | 94.2                  |
| 08001              | Adams, CO                 | -0.416               | 16.11                     | 58.92                 |
| 08003              | Alamosa, CO               | 0.476                | 85.83                     | 94.52                 |
| 08005              | Arapahoe, CO              | -0.503               | 10.19                     | 26.62                 |
| 08007              | Archuleta, CO             | -0.011               | 53.55                     | 25.7                  |
| 08009              | Baca, CO                  | 0.033                | 57.59                     | 60.86                 |
| 08011              | Bent, CO                  | 0.811                | 95.54                     | 89.81                 |
| 08013              | Boulder, CO               | -0.386               | 18.82                     | 17.04                 |
| 08014              | Broomfield, CO            | -0.658               | 2.96                      | 4.9                   |
| 08015              | Chaffee, CO               | -0.111               | 44.51                     | 23.89                 |
| 08017              | Cheyenne, CO              | -0.243               | 32.19                     | 25.89                 |
| 08019              | Clear Creek, CO           | -0.528               | 8.69                      | 1.97                  |
| 08021              | Conejos, CO               | 0.574                | 89.59                     | 93.25                 |
| 08023              | Costilla, CO              | 1.184                | 98.95                     | 93.79                 |
| 08025              | Crowley, CO               | 1.491                | 99.78                     | 89.3                  |
| 08027              | Custer, CO                | 0.157                | 67.24                     | 24.33                 |
| 08029              | Delta, CO                 | 0.344                | 79.21                     | 68.66                 |
| 08031              | Denver, CO                | -0.331               | 23.88                     | 41.97                 |
| 08033              | Dolores, CO               | -0.035               | 51.32                     | 15.16                 |
| 08035              | Douglas, CO               | -0.928               | 0.6                       | 1.5                   |
| 08037              | Eagle, CO                 | -0.667               | 2.74                      | 13.69                 |
| 08039              | Elbert, CO                | -0.697               | 2.07                      | 0                     |
| 08041              | El Paso, CO               | -0.312               | 25.85                     | 39.27                 |

| County FIPS | County Description          | DOS-SVI Index | DOS-SVI Percentile | SVI Percentile |
|-------------|-----------------------------|---------------|--------------------|----------------|
| 08043       | Fremont, CO                 | 0.371         | 80.9               | 65.25          |
| 08045       | Garfield, CO                | -0.576        | 6.05               | 35.1           |
| 08047       | Gilpin, CO                  | -0.629        | 3.76               | 0.22           |
| 08049       | Grand, CO                   | -0.314        | 25.63              | 9.87           |
| 08051       | Gunnison, CO                | -0.212        | 35.27              | 13.92          |
| 08053       | Hinsdale, CO                | 0.023         | 56.61              | 6.24           |
| 08055       | Huerfano, CO                | 0.203         | 70.58              | 59.55          |
| 08057       | Jackson, CO                 | -0.178        | 38.62              | 11.37          |
| 08059       | Jefferson, CO               | -0.492        | 10.63              | 6.27           |
| 08061       | Kiowa, CO                   | -0.442        | 13.91              | 31.88          |
| 08063       | Kit Carson, CO              | -0.105        | 45.18              | 51.53          |
| 08065       | Lake, CO                    | 0.142         | 66.16              | 44.52          |
| 08067       | La Plata, CO                | -0.334        | 23.59              | 10.86          |
| 08069       | Larimer, CO                 | -0.319        | 25.09              | 11.94          |
| 08071       | Las Animas, CO              | 0.435         | 83.64              | 83.73          |
| 08073       | Lincoln, CO                 | 0.225         | 72.11              | 48.57          |
| 08075       | Logan, CO                   | -0.225        | 34                 | 62.8           |
| 08077       | Mesa, CO                    | 0.05          | 59.41              | 57.55          |
| 08079       | Mineral, CO                 | -0.011        | 53.61              | 2.61           |
| 08081       | Moffat, CO                  | -0.311        | 25.88              | 54.71          |
| 08083       | Montezuma, CO               | 0.085         | 62.15              | 49.46          |
| 08085       | Montrose, CO                | 0.162         | 67.59              | 71.53          |
| 08087       | Morgan, CO                  | -0.269        | 29.64              | 74.14          |
| 08089       | Otero, CO                   | 0.46          | 84.94              | 95.61          |
| 08091       | Ouray, CO                   | -0.131        | 42.88              | 2.39           |
| 08093       | Park, CO                    | -0.286        | 28.4               | 0.06           |
| 08095       | Phillips, CO                | -0.677        | 2.52               | 29.55          |
| 08097       | Pitkin, CO                  | -0.53         | 8.6                | 6.56           |
| 08099       | Prowers, CO                 | 0.217         | 71.57              | 93.92          |
| 08101       | Pueblo, CO                  | 0.263         | 74.59              | 86.69          |
| 08103       | Rio Blanco, CO              | -0.385        | 19.01              | 34.01          |
| 08105       | Rio Grande, CO              | 0.253         | 73.93              | 95.86          |
| 08107       | Routt, CO                   | -0.561        | 6.72               | 6.34           |
| 08109       | Saguache, CO                | 0.197         | 70.33              | 80.7           |
| 08111       | San Juan, CO                | -0.333        | 23.66              | 12.83          |
| 08113       | San Miguel, CO              | -0.617        | 4.3                | 3.31           |
| 08115       | Sedgwick, CO                | -0.005        | 54.25              | 69.36          |
| 08117       | Summit, CO                  | -0.468        | 12.38              | 7.07           |
| 08119       | Teller, CO                  | -0.102        | 45.43              | 7.29           |
| 08121       | Washington, CO              | -0.474        | 12                 | 28.22          |
| 08123       | Weld, CO                    | -0.423        | 15.54              | 39.94          |
| 08125       | Yuma, CO                    | -0.478        | 11.68              | 56.37          |
| 09001       | Fairfield, CT               | -0.439        | 14.2               | 44.97          |
| 09003       | Hartford, CT                | -0.267        | 29.89              | 51.5           |
| 09005       | Litchfield, CT              | -0.41         | 16.65              | 8.18           |
| 09007       | Middlesex, CT               | -0.42         | 15.79              | 11.82          |
| 09009       | New Haven, CT               | -0.236        | 32.82              | 52.23          |
| 09011       | New London, CT              | -0.2          | 36.58              | 35.61          |
| 09013       | Tolland, CT                 | -0.334        | 23.62              | 6.94           |
| 09015       | Windham, CT                 | -0.181        | 38.2               | 42.32          |
| 10001       | Kent, DE                    | -0.031        | 51.64              | 72.68          |
| 10003       | New Castle, DE              | -0.2          | 36.61              | 37.61          |
| 10005       | Sussex, DE                  | -0.012        | 53.42              | 40.19          |
| 11001       | District of Columbia,<br>DC | -0.412        | 16.4               | 59.65          |

| <b>County FIPS</b> | <b>County Description</b> | <b>DOS-SVI Index</b> | <b>DOS-SVI Percentile</b> | <b>SVI Percentile</b> |
|--------------------|---------------------------|----------------------|---------------------------|-----------------------|
| 12001              | Alachua, FL               | 0.142                | 66.22                     | 47.29                 |
| 12003              | Baker, FL                 | 0.252                | 73.77                     | 68.03                 |
| 12005              | Bay, FL                   | 0.114                | 64.6                      | 60.76                 |
| 12007              | Bradford, FL              | 0.534                | 88.16                     | 92.64                 |
| 12009              | Brevard, FL               | 0.049                | 59.19                     | 37.13                 |
| 12011              | Broward, FL               | -0.032               | 51.54                     | 58.44                 |
| 12013              | Calhoun, FL               | 0.572                | 89.53                     | 84.01                 |
| 12015              | Charlotte, FL             | 0.446                | 84.46                     | 48.89                 |
| 12017              | Citrus, FL                | 0.626                | 91.18                     | 60.22                 |
| 12019              | Clay, FL                  | -0.034               | 51.45                     | 38.03                 |
| 12021              | Collier, FL               | -0.157               | 40.59                     | 46.18                 |
| 12023              | Columbia, FL              | 0.612                | 90.7                      | 85.96                 |
| 12027              | DeSoto, FL                | 0.496                | 86.47                     | 96.18                 |
| 12029              | Dixie, FL                 | 0.702                | 93.54                     | 89.94                 |
| 12031              | Duval, FL                 | -0.054               | 49.63                     | 69.2                  |
| 12033              | Escambia, FL              | 0.074                | 61.09                     | 48.63                 |
| 12035              | Flagler, FL               | 0.056                | 59.69                     | 27.99                 |
| 12037              | Franklin, FL              | 0.65                 | 91.94                     | 80.83                 |
| 12039              | Gadsden, FL               | 0.657                | 92.26                     | 99.01                 |
| 12041              | Gilchrist, FL             | 0.678                | 92.9                      | 75.67                 |
| 12043              | Glades, FL                | 1.249                | 99.17                     | 90.48                 |
| 12045              | Gulf, FL                  | 0.567                | 89.37                     | 59.2                  |
| 12047              | Hamilton, FL              | 1.506                | 99.84                     | 99.08                 |
| 12049              | Hardee, FL                | 0.154                | 67.05                     | 98.31                 |
| 12051              | Hendry, FL                | 0.535                | 88.25                     | 99.39                 |
| 12053              | Hernando, FL              | 0.379                | 81.31                     | 54.9                  |
| 12055              | Highlands, FL             | 0.798                | 95.42                     | 87.29                 |
| 12057              | Hillsborough, FL          | -0.106               | 45.08                     | 67.01                 |
| 12059              | Holmes, FL                | 0.993                | 97.33                     | 93.47                 |
| 12061              | Indian River, FL          | 0.193                | 70.11                     | 39.62                 |
| 12063              | Jackson, FL               | 0.718                | 93.92                     | 95.83                 |
| 12065              | Jefferson, FL             | 0.57                 | 89.43                     | 57.48                 |
| 12067              | Lafayette, FL             | 0.973                | 97.2                      | 98.06                 |
| 12069              | Lake, FL                  | 0.188                | 69.75                     | 60.29                 |
| 12071              | Lee, FL                   | 0.089                | 62.5                      | 55.25                 |
| 12073              | Leon, FL                  | 0.206                | 70.81                     | 49.43                 |
| 12075              | Levy, FL                  | 0.703                | 93.57                     | 77.93                 |
| 12077              | Liberty, FL               | 1.192                | 98.98                     | 83.34                 |
| 12079              | Madison, FL               | 0.671                | 92.65                     | 96.08                 |
| 12081              | Manatee, FL               | 0.081                | 61.64                     | 51.97                 |
| 12083              | Marion, FL                | 0.517                | 87.55                     | 75.35                 |
| 12085              | Martin, FL                | -0.015               | 53.1                      | 39.9                  |
| 12086              | Miami-Dade, FL            | 0.087                | 62.4                      | 81.75                 |
| 12087              | Monroe, FL                | -0.266               | 30.02                     | 45.57                 |
| 12089              | Nassau, FL                | -0.08                | 47.37                     | 24.59                 |
| 12091              | Okaloosa, FL              | -0.144               | 41.58                     | 38.6                  |
| 12093              | Okeechobee, FL            | 0.588                | 90.13                     | 94.65                 |
| 12095              | Orange, FL                | -0.053               | 49.7                      | 66.91                 |
| 12097              | Osceola, FL               | 0.107                | 63.71                     | 81.78                 |
| 12099              | Palm Beach, FL            | -0.04                | 50.84                     | 55.92                 |
| 12101              | Pasco, FL                 | 0.162                | 67.56                     | 63.44                 |
| 12103              | Pinellas, FL              | 0.065                | 60.36                     | 51.69                 |
| 12105              | Polk, FL                  | 0.22                 | 71.76                     | 90.35                 |
| 12107              | Putnam, FL                | 0.893                | 96.31                     | 95.25                 |
| 12109              | St. Johns, FL             | -0.344               | 22.76                     | 7.61                  |

| County FIPS | County Description | DOS-SVI Index | DOS-SVI Percentile | SVI Percentile |
|-------------|--------------------|---------------|--------------------|----------------|
| 12111       | St. Lucie, FL      | 0.177         | 68.74              | 71.85          |
| 12113       | Santa Rosa, FL     | -0.132        | 42.79              | 30.96          |
| 12115       | Sarasota, FL       | -0.003        | 54.41              | 25.38          |
| 12117       | Seminole, FL       | -0.221        | 34.19              | 18.44          |
| 12119       | Sumter, FL         | 0.43          | 83.51              | 23.6           |
| 12121       | Suwannee, FL       | 0.664         | 92.45              | 94.24          |
| 12123       | Taylor, FL         | 0.682         | 93                 | 89.84          |
| 12125       | Union, FL          | 1.018         | 97.64              | 83.82          |
| 12127       | Volusia, FL        | 0.162         | 67.62              | 53.47          |
| 12129       | Wakulla, FL        | 0.154         | 67.02              | 40.32          |
| 12131       | Walton, FL         | -0.023        | 52.44              | 58.22          |
| 12133       | Washington, FL     | 0.822         | 95.67              | 89.39          |
| 13001       | Appling, GA        | 0.439         | 84.02              | 96.69          |
| 13003       | Atkinson, GA       | 0.791         | 95.26              | 96.15          |
| 13005       | Bacon, GA          | 0.445         | 84.4               | 93.89          |
| 13007       | Baker, GA          | 0.508         | 87.04              | 74.24          |
| 13009       | Baldwin, GA        | 0.71          | 93.79              | 86.66          |
| 13011       | Banks, GA          | 0.18          | 68.96              | 55.86          |
| 13013       | Barrow, GA         | -0.215        | 34.86              | 42.04          |
| 13015       | Bartow, GA         | -0.12         | 43.74              | 59.14          |
| 13017       | Ben Hill, GA       | 0.249         | 73.64              | 87.26          |
| 13019       | Berrien, GA        | 0.629         | 91.4               | 85             |
| 13021       | Bibb, GA           | 0.247         | 73.45              | 91.75          |
| 13023       | Bleckley, GA       | 0.477         | 85.9               | 73.95          |
| 13025       | Brantley, GA       | 0.67          | 92.61              | 62.29          |
| 13027       | Brooks, GA         | 0.726         | 94.11              | 83.98          |
| 13029       | Bryan, GA          | -0.223        | 34.07              | 33.89          |
| 13031       | Bulloch, GA        | 0.552         | 88.89              | 81.21          |
| 13033       | Burke, GA          | 0.27          | 75.1               | 84.55          |
| 13035       | Butts, GA          | 0.269         | 75.07              | 76.53          |
| 13037       | Calhoun, GA        | 1.486         | 99.75              | 97.74          |
| 13039       | Camden, GA         | -0.124        | 43.3               | 51.59          |
| 13043       | Candler, GA        | 0.514         | 87.49              | 98.28          |
| 13045       | Carroll, GA        | 0.18          | 68.99              | 78.25          |
| 13047       | Catoosa, GA        | -0.249        | 31.39              | 13.18          |
| 13049       | Charlton, GA       | 1.257         | 99.24              | 87.52          |
| 13051       | Chatham, GA        | 0.082         | 61.73              | 69.49          |
| 13053       | Chattahoochee, GA  | 0.306         | 77.4               | 63.79          |
| 13055       | Chattooga, GA      | 0.357         | 79.91              | 92.52          |
| 13057       | Cherokee, GA       | -0.525        | 8.76               | 11.85          |
| 13059       | Clarke, GA         | 0.325         | 78.06              | 76.75          |
| 13061       | Clay, GA           | 1.702         | 100                | 93.09          |
| 13063       | Clayton, GA        | 0.12          | 64.92              | 91.02          |
| 13065       | Clinch, GA         | 0.645         | 91.79              | 97.77          |
| 13067       | Cobb, GA           | -0.392        | 18.24              | 26.69          |
| 13069       | Coffee, GA         | 0.399         | 82.23              | 95.06          |
| 13071       | Colquitt, GA       | 0.377         | 81.22              | 98.12          |
| 13073       | Columbia, GA       | -0.345        | 22.67              | 13.34          |
| 13075       | Cook, GA           | 0.332         | 78.45              | 85.1           |
| 13077       | Coweta, GA         | -0.402        | 17.26              | 24.27          |
| 13079       | Crawford, GA       | 0.684         | 93.03              | 68.15          |
| 13081       | Crisp, GA          | 0.728         | 94.24              | 98.57          |
| 13083       | Dade, GA           | 0.102         | 63.45              | 51.56          |
| 13085       | Dawson, GA         | -0.246        | 31.74              | 10.38          |
| 13087       | Decatur, GA        | 0.119         | 64.85              | 94.55          |



| <b>County FIPS</b> | <b>County Description</b> | <b>DOS-SVI Index</b> | <b>DOS-SVI Percentile</b> | <b>SVI Percentile</b> |
|--------------------|---------------------------|----------------------|---------------------------|-----------------------|
| 13089              | DeKalb, GA                | -0.044               | 50.4                      | 66.11                 |
| 13091              | Dodge, GA                 | 0.648                | 91.91                     | 92.23                 |
| 13093              | Dooly, GA                 | 1.169                | 98.82                     | 94.84                 |
| 13095              | Dougherty, GA             | 0.691                | 93.19                     | 95.13                 |
| 13097              | Douglas, GA               | -0.099               | 45.94                     | 54.04                 |
| 13099              | Early, GA                 | 0.394                | 81.92                     | 92.01                 |
| 13101              | Echols, GA                | 0.697                | 93.38                     | 66.15                 |
| 13103              | Effingham, GA             | -0.33                | 23.97                     | 23.63                 |
| 13105              | Elbert, GA                | 0.481                | 86.06                     | 83.38                 |
| 13107              | Emanuel, GA               | 0.502                | 86.79                     | 97.68                 |
| 13109              | Evans, GA                 | 0.581                | 89.81                     | 98.47                 |
| 13111              | Fannin, GA                | 0.294                | 76.6                      | 30.03                 |
| 13113              | Fayette, GA               | -0.462               | 12.73                     | 6.08                  |
| 13115              | Floyd, GA                 | 0.028                | 56.89                     | 88.54                 |
| 13117              | Forsyth, GA               | -0.74                | 1.62                      | 3.73                  |
| 13119              | Franklin, GA              | 0.415                | 82.94                     | 84.62                 |
| 13121              | Fulton, GA                | -0.205               | 35.91                     | 52.68                 |
| 13123              | Gilmer, GA                | 0.261                | 74.47                     | 55.99                 |
| 13125              | Glascock, GA              | 0.053                | 59.53                     | 68.6                  |
| 13127              | Glynn, GA                 | -0.004               | 54.28                     | 71.59                 |
| 13129              | Gordon, GA                | 0.028                | 56.92                     | 88.06                 |
| 13131              | Grady, GA                 | 0.48                 | 85.96                     | 92.58                 |
| 13133              | Greene, GA                | 0.227                | 72.27                     | 53.79                 |
| 13135              | Gwinnett, GA              | -0.426               | 15.28                     | 43.47                 |
| 13137              | Habersham, GA             | 0.038                | 58.29                     | 71.46                 |
| 13139              | Hall, GA                  | -0.347               | 22.41                     | 66.18                 |
| 13141              | Hancock, GA               | 0.993                | 97.29                     | 79.84                 |
| 13143              | Haralson, GA              | 0.037                | 58.2                      | 54.27                 |
| 13145              | Harris, GA                | -0.04                | 50.91                     | 13.41                 |
| 13147              | Hart, GA                  | 0.369                | 80.83                     | 71.94                 |
| 13149              | Heard, GA                 | 0.392                | 81.79                     | 72.32                 |
| 13151              | Henry, GA                 | -0.164               | 39.99                     | 31.37                 |
| 13153              | Houston, GA               | -0.118               | 43.9                      | 56.69                 |
| 13155              | Irwin, GA                 | 0.78                 | 95.13                     | 84.08                 |
| 13157              | Jackson, GA               | -0.203               | 36.26                     | 35.16                 |
| 13159              | Jasper, GA                | 0.229                | 72.33                     | 69.27                 |
| 13161              | Jeff Davis, GA            | 0.188                | 69.72                     | 93.73                 |
| 13163              | Jefferson, GA             | 0.428                | 83.41                     | 94.39                 |
| 13165              | Jenkins, GA               | 0.291                | 76.38                     | 82.83                 |
| 13167              | Johnson, GA               | 0.541                | 88.54                     | 90.61                 |
| 13169              | Jones, GA                 | 0.171                | 68.45                     | 37.93                 |
| 13171              | Lamar, GA                 | 0.568                | 89.4                      | 49.17                 |
| 13173              | Lanier, GA                | 0.56                 | 89.24                     | 86.97                 |
| 13175              | Laurens, GA               | 0.195                | 70.17                     | 80.13                 |
| 13177              | Lee, GA                   | -0.119               | 43.84                     | 35.19                 |
| 13179              | Liberty, GA               | 0.29                 | 76.28                     | 88.82                 |
| 13181              | Lincoln, GA               | 0.401                | 82.33                     | 55.64                 |
| 13183              | Long, GA                  | 0.953                | 97.01                     | 82.71                 |
| 13185              | Lowndes, GA               | 0.177                | 68.7                      | 86.62                 |
| 13187              | Lumpkin, GA               | 0.209                | 71                        | 43.38                 |
| 13189              | McDuffie, GA              | 0.303                | 77.2                      | 93.76                 |
| 13191              | McIntosh, GA              | 0.761                | 94.75                     | 58.63                 |
| 13193              | Macon, GA                 | 1.121                | 98.44                     | 93.12                 |
| 13195              | Madison, GA               | 0.413                | 82.84                     | 64.17                 |
| 13197              | Marion, GA                | 0.838                | 96.05                     | 85.19                 |

| <b>County FIPS</b> | <b>County Description</b> | <b>DOS-SVI Index</b> | <b>DOS-SVI Percentile</b> | <b>SVI Percentile</b> |
|--------------------|---------------------------|----------------------|---------------------------|-----------------------|
| 13199              | Meriwether, GA            | 0.406                | 82.58                     | 87.01                 |
| 13201              | Miller, GA                | -0.018               | 52.79                     | 77.99                 |
| 13205              | Mitchell, GA              | 0.941                | 96.85                     | 98.79                 |
| 13207              | Monroe, GA                | 0.182                | 69.15                     | 45.96                 |
| 13209              | Montgomery, GA            | 0.595                | 90.26                     | 84.65                 |
| 13211              | Morgan, GA                | -0.033               | 51.51                     | 24.46                 |
| 13213              | Murray, GA                | 0.373                | 81.06                     | 71.34                 |
| 13215              | Muscogee, GA              | 0.235                | 72.75                     | 90.03                 |
| 13217              | Newton, GA                | 0.072                | 61                        | 70.7                  |
| 13219              | Oconee, GA                | -0.73                | 1.75                      | 3.54                  |
| 13221              | Oglethorpe, GA            | 0.273                | 75.33                     | 52.17                 |
| 13223              | Paulding, GA              | -0.503               | 10.12                     | 13.76                 |
| 13225              | Peach, GA                 | 0.501                | 86.72                     | 94.04                 |
| 13227              | Pickens, GA               | -0.017               | 52.91                     | 27.96                 |
| 13229              | Pierce, GA                | 0.329                | 78.35                     | 65.7                  |
| 13231              | Pike, GA                  | -0.083               | 47.02                     | 15.1                  |
| 13233              | Polk, GA                  | -0.079               | 47.63                     | 80.48                 |
| 13235              | Pulaski, GA               | 0.622                | 91.02                     | 84.59                 |
| 13237              | Putnam, GA                | 0.222                | 71.92                     | 42.8                  |
| 13239              | Quitman, GA               | 1.374                | 99.52                     | 94.33                 |
| 13241              | Rabun, GA                 | 0.156                | 67.18                     | 53.41                 |
| 13243              | Randolph, GA              | 0.464                | 85.26                     | 97.39                 |
| 13245              | Richmond, GA              | 0.511                | 87.27                     | 93.28                 |
| 13247              | Rockdale, GA              | -0.024               | 52.31                     | 55.29                 |
| 13249              | Schley, GA                | 0.78                 | 95.1                      | 82.48                 |
| 13251              | Screven, GA               | 0.386                | 81.57                     | 85.25                 |
| 13253              | Seminole, GA              | 0.397                | 82.14                     | 83.44                 |
| 13255              | Spalding, GA              | 0.114                | 64.53                     | 86.91                 |
| 13257              | Stephens, GA              | 0.42                 | 83.16                     | 79.68                 |
| 13259              | Stewart, GA               | 1.38                 | 99.55                     | 92.45                 |
| 13261              | Sumter, GA                | 0.492                | 86.34                     | 97.64                 |
| 13263              | Talbot, GA                | 0.747                | 94.49                     | 85.89                 |
| 13265              | Taliaferro, GA            | 1.273                | 99.3                      | 90.89                 |
| 13267              | Tattall, GA               | 0.492                | 86.31                     | 90.8                  |
| 13269              | Taylor, GA                | 0.996                | 97.36                     | 91.97                 |
| 13271              | Telfair, GA               | 0.628                | 91.34                     | 83.69                 |
| 13273              | Terrell, GA               | 0.498                | 86.6                      | 95.7                  |
| 13275              | Thomas, GA                | 0.286                | 76.06                     | 91.08                 |
| 13277              | Tift, GA                  | 0.035                | 57.98                     | 88.09                 |
| 13279              | Toombs, GA                | 0.367                | 80.58                     | 97.61                 |
| 13281              | Towns, GA                 | 0.383                | 81.5                      | 32.58                 |
| 13283              | Treutlen, GA              | 0.483                | 86.09                     | 94.71                 |
| 13285              | Troup, GA                 | 0.187                | 69.66                     | 90.13                 |
| 13287              | Turner, GA                | 0.415                | 82.97                     | 98.09                 |
| 13289              | Twiggs, GA                | 0.89                 | 96.28                     | 75.8                  |
| 13291              | Union, GA                 | 0.05                 | 59.34                     | 31.15                 |
| 13293              | Upson, GA                 | 0.346                | 79.37                     | 85.32                 |
| 13295              | Walker, GA                | 0.151                | 66.7                      | 64.08                 |
| 13297              | Walton, GA                | -0.182               | 38.01                     | 29.3                  |
| 13299              | Ware, GA                  | 0.14                 | 66.09                     | 84.49                 |
| 13301              | Warren, GA                | 0.642                | 91.63                     | 89.46                 |
| 13303              | Washington, GA            | 0.694                | 93.28                     | 94.62                 |
| 13305              | Wayne, GA                 | 0.327                | 78.19                     | 91.66                 |
| 13307              | Webster, GA               | 0.403                | 82.43                     | 78.76                 |
| 13309              | Wheeler, GA               | 0.983                | 97.26                     | 81.24                 |

| <b>County FIPS</b> | <b>County Description</b> | <b>DOS-SVI Index</b> | <b>DOS-SVI Percentile</b> | <b>SVI Percentile</b> |
|--------------------|---------------------------|----------------------|---------------------------|-----------------------|
| 13311              | White, GA                 | 0.047                | 59.09                     | 23.57                 |
| 13313              | Whitfield, GA             | -0.063               | 48.97                     | 87.93                 |
| 13315              | Wilcox, GA                | 0.719                | 93.95                     | 81.69                 |
| 13317              | Wilkes, GA                | 0.289                | 76.25                     | 75.61                 |
| 13319              | Wilkinson, GA             | 0.461                | 84.97                     | 78.73                 |
| 13321              | Worth, GA                 | 0.46                 | 84.91                     | 73.57                 |
| 15001              | Hawaii, HI                | -0.169               | 39.38                     | 57.71                 |
| 15003              | Honolulu, HI              | -0.509               | 9.58                      | 47.2                  |
| 15005              | Kalawao, HI               | 0.039                | 58.55                     | 31.62                 |
| 15007              | Kauai, HI                 | -0.52                | 9.04                      | 30.99                 |
| 15009              | Maui, HI                  | -0.561               | 6.69                      | 38.79                 |
| 16001              | Ada, ID                   | -0.522               | 8.91                      | 13.73                 |
| 16003              | Adams, ID                 | 0.511                | 87.23                     | 29.36                 |
| 16005              | Bannock, ID               | -0.158               | 40.47                     | 57.9                  |
| 16007              | Bear Lake, ID             | -0.456               | 13.18                     | 21.43                 |
| 16009              | Benewah, ID               | 0.189                | 69.82                     | 73.34                 |
| 16011              | Bingham, ID               | -0.381               | 19.45                     | 50.7                  |
| 16013              | Blaine, ID                | -0.439               | 14.17                     | 32.39                 |
| 16015              | Boise, ID                 | 0.032                | 57.47                     | 6.72                  |
| 16017              | Bonner, ID                | -0.117               | 44.09                     | 24.01                 |
| 16019              | Bonneville, ID            | -0.604               | 4.9                       | 36.34                 |
| 16021              | Boundary, ID              | -0.238               | 32.66                     | 30.83                 |
| 16023              | Butte, ID                 | -0.055               | 49.6                      | 24.62                 |
| 16025              | Camas, ID                 | -0.21                | 35.4                      | 13.38                 |
| 16027              | Canyon, ID                | -0.203               | 36.23                     | 73.66                 |
| 16029              | Caribou, ID               | -0.736               | 1.69                      | 19.17                 |
| 16031              | Cassia, ID                | -0.413               | 16.3                      | 67.32                 |
| 16033              | Clark, ID                 | -0.097               | 46.07                     | 89.11                 |
| 16035              | Clearwater, ID            | 0.372                | 80.93                     | 44.01                 |
| 16037              | Custer, ID                | 0.408                | 82.68                     | 43.69                 |
| 16039              | Elmore, ID                | -0.062               | 49.06                     | 58.82                 |
| 16041              | Franklin, ID              | -0.82                | 1.08                      | 14.14                 |
| 16043              | Fremont, ID               | -0.189               | 37.66                     | 51.37                 |
| 16045              | Gem, ID                   | 0.029                | 56.99                     | 66.27                 |
| 16047              | Gooding, ID               | -0.144               | 41.55                     | 70.76                 |
| 16049              | Idaho, ID                 | 0.133                | 65.49                     | 53.92                 |
| 16051              | Jefferson, ID             | -0.672               | 2.61                      | 25.25                 |
| 16053              | Jerome, ID                | -0.33                | 23.94                     | 67.36                 |
| 16055              | Kootenai, ID              | -0.262               | 30.28                     | 23.28                 |
| 16057              | Latah, ID                 | -0.002               | 54.57                     | 24.84                 |
| 16059              | Lemhi, ID                 | -0.08                | 47.53                     | 29.97                 |
| 16061              | Lewis, ID                 | 0.17                 | 68.35                     | 56.78                 |
| 16063              | Lincoln, ID               | -0.234               | 33.02                     | 55.76                 |
| 16065              | Madison, ID               | -0.242               | 32.41                     | 40.29                 |
| 16067              | Minidoka, ID              | -0.178               | 38.59                     | 67.83                 |
| 16069              | Nez Perce, ID             | -0.15                | 40.97                     | 50.67                 |
| 16071              | Oneida, ID                | -0.314               | 25.66                     | 34.24                 |
| 16073              | Owyhee, ID                | 0.029                | 56.96                     | 82.45                 |
| 16075              | Payette, ID               | -0.178               | 38.52                     | 60.1                  |
| 16077              | Power, ID                 | -0.134               | 42.5                      | 51.62                 |
| 16079              | Shoshone, ID              | 0.43                 | 83.48                     | 75.7                  |
| 16081              | Teton, ID                 | -0.438               | 14.33                     | 13.44                 |
| 16083              | Twin Falls, ID            | -0.406               | 16.91                     | 49.55                 |
| 16085              | Valley, ID                | -0.091               | 46.58                     | 8.82                  |
| 16087              | Washington, ID            | 0.036                | 58.07                     | 85.06                 |

| <b>County FIPS</b> | <b>County Description</b> | <b>DOS-SVI Index</b> | <b>DOS-SVI Percentile</b> | <b>SVI Percentile</b> |
|--------------------|---------------------------|----------------------|---------------------------|-----------------------|
| 17001              | Adams, IL                 | -0.357               | 21.49                     | 24.9                  |
| 17003              | Alexander, IL             | 0.476                | 85.77                     | 95.73                 |
| 17005              | Bond, IL                  | -0.143               | 41.64                     | 37.32                 |
| 17007              | Boone, IL                 | -0.296               | 27.32                     | 46.97                 |
| 17009              | Brown, IL                 | 0.1                  | 63.36                     | 47.45                 |
| 17011              | Bureau, IL                | -0.256               | 30.79                     | 28.63                 |
| 17013              | Calhoun, IL               | -0.057               | 49.41                     | 19.01                 |
| 17015              | Carroll, IL               | -0.074               | 48.01                     | 16.82                 |
| 17017              | Cass, IL                  | -0.1                 | 45.81                     | 69.71                 |
| 17019              | Champaign, IL             | -0.31                | 26.04                     | 49.9                  |
| 17021              | Christian, IL             | -0.309               | 26.2                      | 24.08                 |
| 17023              | Clark, IL                 | -0.098               | 46                        | 20.73                 |
| 17025              | Clay, IL                  | 0.03                 | 57.24                     | 61.15                 |
| 17027              | Clinton, IL               | -0.327               | 24.13                     | 17.87                 |
| 17029              | Coles, IL                 | 0.066                | 60.43                     | 49.78                 |
| 17031              | Cook, IL                  | -0.233               | 33.17                     | 67.55                 |
| 17033              | Crawford, IL              | -0.024               | 52.34                     | 38.38                 |
| 17035              | Cumberland, IL            | -0.236               | 32.86                     | 16.27                 |
| 17037              | DeKalb, IL                | -0.116               | 44.25                     | 48.66                 |
| 17039              | De Witt, IL               | -0.283               | 28.59                     | 12.9                  |
| 17041              | Douglas, IL               | -0.541               | 8.12                      | 44.39                 |
| 17043              | DuPage, IL                | -0.556               | 7.04                      | 16.11                 |
| 17045              | Edgar, IL                 | -0.137               | 42.15                     | 34.33                 |
| 17047              | Edwards, IL               | -0.097               | 46.13                     | 24.43                 |
| 17049              | Effingham, IL             | -0.462               | 12.7                      | 19.9                  |
| 17051              | Fayette, IL               | 0.299                | 76.95                     | 59.49                 |
| 17053              | Ford, IL                  | -0.181               | 38.27                     | 30.51                 |
| 17055              | Franklin, IL              | 0.251                | 73.73                     | 60.92                 |
| 17057              | Fulton, IL                | -0.002               | 54.54                     | 57.61                 |
| 17059              | Gallatin, IL              | 0.17                 | 68.26                     | 45.38                 |
| 17061              | Greene, IL                | -0.12                | 43.81                     | 19.52                 |
| 17063              | Grundy, IL                | -0.519               | 9.14                      | 8.44                  |
| 17065              | Hamilton, IL              | -0.146               | 41.23                     | 15.29                 |
| 17067              | Hancock, IL               | -0.164               | 39.95                     | 12.32                 |
| 17069              | Hardin, IL                | 1.05                 | 97.87                     | 50.19                 |
| 17071              | Henderson, IL             | -0.023               | 52.4                      | 6.69                  |
| 17073              | Henry, IL                 | -0.298               | 27.16                     | 20.1                  |
| 17075              | Iroquois, IL              | -0.155               | 40.75                     | 34.04                 |
| 17077              | Jackson, IL               | 0.405                | 82.55                     | 70.45                 |
| 17079              | Jasper, IL                | -0.142               | 41.74                     | 24.17                 |
| 17081              | Jefferson, IL             | 0.257                | 74.12                     | 81.08                 |
| 17083              | Jersey, IL                | -0.342               | 23.05                     | 10.41                 |
| 17085              | Jo Daviess, IL            | -0.294               | 27.6                      | 5.25                  |
| 17087              | Johnson, IL               | 0.276                | 75.52                     | 46.24                 |
| 17089              | Kane, IL                  | -0.475               | 11.91                     | 41.69                 |
| 17091              | Kankakee, IL              | -0.139               | 42.06                     | 66.56                 |
| 17093              | Kendall, IL               | -0.697               | 2.1                       | 13.98                 |
| 17095              | Knox, IL                  | -0.006               | 54.19                     | 64.62                 |
| 17097              | Lake, IL                  | -0.488               | 10.89                     | 35.13                 |
| 17099              | LaSalle, IL               | -0.122               | 43.68                     | 43.03                 |
| 17101              | Lawrence, IL              | 0.274                | 75.36                     | 77.83                 |
| 17103              | Lee, IL                   | -0.217               | 34.73                     | 30.1                  |
| 17105              | Livingston, IL            | -0.166               | 39.73                     | 48.41                 |
| 17107              | Logan, IL                 | -0.085               | 46.86                     | 22.71                 |
| 17109              | McDonough, IL             | 0.204                | 70.61                     | 51.66                 |

| County FIPS | County Description | DOS-SVI Index | DOS-SVI Percentile | SVI Percentile |
|-------------|--------------------|---------------|--------------------|----------------|
| 17111       | McHenry, IL        | -0.598        | 5.06               | 7.01           |
| 17113       | McLean, IL         | -0.432        | 14.8               | 19.04          |
| 17115       | Macon, IL          | -0.003        | 54.47              | 59.71          |
| 17117       | Macoupin, IL       | -0.05         | 49.92              | 19.87          |
| 17119       | Madison, IL        | -0.182        | 38.11              | 29.65          |
| 17121       | Marion, IL         | 0.277         | 75.58              | 73.85          |
| 17123       | Marshall, IL       | -0.17         | 39.32              | 5.45           |
| 17125       | Mason, IL          | 0.122         | 64.95              | 29.46          |
| 17127       | Massac, IL         | 0.138         | 65.9               | 75.13          |
| 17129       | Menard, IL         | -0.386        | 18.85              | 4.84           |
| 17131       | Mercer, IL         | -0.276        | 29.04              | 11.34          |
| 17133       | Monroe, IL         | -0.71         | 1.94               | 0.16           |
| 17135       | Montgomery, IL     | -0.072        | 48.11              | 39.14          |
| 17137       | Morgan, IL         | 0.023         | 56.64              | 50.45          |
| 17139       | Moultrie, IL       | -0.707        | 1.97               | 29.49          |
| 17141       | Ogle, IL           | -0.332        | 23.72              | 29.17          |
| 17143       | Peoria, IL         | -0.135        | 42.38              | 61.31          |
| 17145       | Perry, IL          | 0.275         | 75.45              | 64.87          |
| 17147       | Piatt, IL          | -0.46         | 12.96              | 0.32           |
| 17149       | Pike, IL           | -0.141        | 41.8               | 34.94          |
| 17151       | Pope, IL           | 1.145         | 98.6               | 45.45          |
| 17153       | Pulaski, IL        | 0.581         | 89.84              | 69.43          |
| 17155       | Putnam, IL         | -0.384        | 19.1               | 2.77           |
| 17157       | Randolph, IL       | 0.08          | 61.54              | 45.67          |
| 17159       | Richland, IL       | -0.026        | 52.05              | 41.05          |
| 17161       | Rock Island, IL    | -0.132        | 42.82              | 71.37          |
| 17163       | St. Clair, IL      | -0.102        | 45.4               | 52.29          |
| 17165       | Saline, IL         | 0.444         | 84.34              | 86.37          |
| 17167       | Sangamon, IL       | -0.223        | 34.1               | 43.57          |
| 17169       | Schuyler, IL       | 0.341         | 79.02              | 57.07          |
| 17171       | Scott, IL          | -0.211        | 35.37              | 13.54          |
| 17173       | Shelby, IL         | -0.257        | 30.72              | 8.5            |
| 17175       | Stark, IL          | -0.31         | 26.07              | 6.34           |
| 17177       | Stephenson, IL     | -0.102        | 45.49              | 50             |
| 17179       | Tazewell, IL       | -0.508        | 9.71               | 10.7           |
| 17181       | Union, IL          | 0.109         | 63.87              | 68.44          |
| 17183       | Vermilion, IL      | -0.009        | 53.8               | 81.31          |
| 17185       | Wabash, IL         | -0.056        | 49.54              | 32.07          |
| 17187       | Warren, IL         | -0.187        | 37.76              | 60.73          |
| 17189       | Washington, IL     | -0.387        | 18.66              | 6.53           |
| 17191       | Wayne, IL          | -0.099        | 45.97              | 43.31          |
| 17193       | White, IL          | 0.097         | 63.16              | 53.82          |
| 17195       | Whiteside, IL      | -0.253        | 31.11              | 32.83          |
| 17197       | Will, IL           | -0.508        | 9.74               | 20.22          |
| 17199       | Williamson, IL     | -0.05         | 49.89              | 48.06          |
| 17201       | Winnebago, IL      | -0.006        | 54.09              | 72.04          |
| 17203       | Woodford, IL       | -0.639        | 3.47               | 1.88           |
| 18001       | Adams, IN          | -0.75         | 1.53               | 59.04          |
| 18003       | Allen, IN          | -0.288        | 28.24              | 52.36          |
| 18005       | Bartholomew, IN    | -0.352        | 22.22              | 36.31          |
| 18007       | Benton, IN         | -0.204        | 36.07              | 33.47          |
| 18009       | Blackford, IN      | -0.026        | 51.99              | 37.1           |
| 18011       | Boone, IN          | -0.838        | 0.99               | 4.49           |
| 18013       | Brown, IN          | -0.229        | 33.56              | 6.02           |
| 18015       | Carroll, IN        | -0.311        | 25.98              | 11.75          |

| <b>County FIPS</b> | <b>County Description</b> | <b>DOS-SVI Index</b> | <b>DOS-SVI Percentile</b> | <b>SVI Percentile</b> |
|--------------------|---------------------------|----------------------|---------------------------|-----------------------|
| 18017              | Cass, IN                  | -0.09                | 46.61                     | 71.97                 |
| 18019              | Clark, IN                 | -0.245               | 31.93                     | 25.48                 |
| 18021              | Clay, IN                  | -0.129               | 42.95                     | 33.38                 |
| 18023              | Clinton, IN               | -0.324               | 24.36                     | 57.1                  |
| 18025              | Crawford, IN              | 0.091                | 62.66                     | 38.89                 |
| 18027              | Daviess, IN               | -0.582               | 5.86                      | 68.82                 |
| 18029              | Dearborn, IN              | -0.383               | 19.26                     | 7.99                  |
| 18031              | Decatur, IN               | -0.335               | 23.5                      | 21.02                 |
| 18033              | DeKalb, IN                | -0.329               | 24.04                     | 23.34                 |
| 18035              | Delaware, IN              | 0.162                | 67.53                     | 56.66                 |
| 18037              | Dubois, IN                | -0.629               | 3.69                      | 20.8                  |
| 18039              | Elkhart, IN               | -0.358               | 21.39                     | 77.01                 |
| 18041              | Fayette, IN               | -0.072               | 48.14                     | 61.08                 |
| 18043              | Floyd, IN                 | -0.401               | 17.38                     | 16.69                 |
| 18045              | Fountain, IN              | -0.066               | 48.77                     | 20.32                 |
| 18047              | Franklin, IN              | -0.39                | 18.37                     | 14.71                 |
| 18049              | Fulton, IN                | -0.151               | 40.94                     | 34.59                 |
| 18051              | Gibson, IN                | -0.369               | 20.66                     | 31.5                  |
| 18053              | Grant, IN                 | 0.238                | 72.94                     | 73.31                 |
| 18055              | Greene, IN                | 0.004                | 55.14                     | 44.43                 |
| 18057              | Hamilton, IN              | -0.87                | 0.92                      | 2.55                  |
| 18059              | Hancock, IN               | -0.576               | 6.11                      | 1.69                  |
| 18061              | Harrison, IN              | -0.039               | 50.97                     | 18.66                 |
| 18063              | Hendricks, IN             | -0.604               | 4.93                      | 8.15                  |
| 18065              | Henry, IN                 | 0.029                | 57.12                     | 37.93                 |
| 18067              | Howard, IN                | -0.06                | 49.32                     | 48.15                 |
| 18069              | Huntington, IN            | -0.356               | 21.52                     | 12.48                 |
| 18071              | Jackson, IN               | -0.172               | 39.22                     | 53.89                 |
| 18073              | Jasper, IN                | -0.343               | 22.99                     | 26.85                 |
| 18075              | Jay, IN                   | -0.285               | 28.43                     | 67.48                 |
| 18077              | Jefferson, IN             | -0.007               | 54.06                     | 44.14                 |
| 18079              | Jennings, IN              | -0.105               | 45.21                     | 38.47                 |
| 18081              | Johnson, IN               | -0.539               | 8.18                      | 14.24                 |
| 18083              | Knox, IN                  | -0.001               | 54.66                     | 59.27                 |
| 18085              | Kosciusko, IN             | -0.344               | 22.73                     | 46.08                 |
| 18087              | LaGrange, IN              | -1.128               | 0.29                      | 37.07                 |
| 18089              | Lake, IN                  | -0.026               | 52.09                     | 72.52                 |
| 18091              | LaPorte, IN               | -0.013               | 53.39                     | 72.17                 |
| 18093              | Lawrence, IN              | -0.082               | 47.21                     | 27.52                 |
| 18095              | Madison, IN               | 0.017                | 56.13                     | 67.13                 |
| 18097              | Marion, IN                | -0.042               | 50.62                     | 79.71                 |
| 18099              | Marshall, IN              | -0.317               | 25.25                     | 57.96                 |
| 18101              | Martin, IN                | -0.114               | 44.41                     | 23.98                 |
| 18103              | Miami, IN                 | 0.099                | 63.23                     | 58.79                 |
| 18105              | Monroe, IN                | 0.161                | 67.46                     | 45.19                 |
| 18107              | Montgomery, IN            | -0.309               | 26.23                     | 36.85                 |
| 18109              | Morgan, IN                | -0.201               | 36.45                     | 21.56                 |
| 18111              | Newton, IN                | -0.037               | 51.13                     | 33.66                 |
| 18113              | Noble, IN                 | -0.373               | 20.18                     | 47.42                 |
| 18115              | Ohio, IN                  | -0.321               | 24.83                     | 2.52                  |
| 18117              | Orange, IN                | 0.035                | 57.82                     | 64.55                 |
| 18119              | Owen, IN                  | 0.119                | 64.88                     | 34.55                 |
| 18121              | Parke, IN                 | 0                    | 54.79                     | 58.09                 |
| 18123              | Perry, IN                 | -0.2                 | 36.64                     | 31.02                 |
| 18125              | Pike, IN                  | -0.082               | 47.25                     | 17.45                 |

| <b>County FIPS</b> | <b>County Description</b> | <b>DOS-SVI Index</b> | <b>DOS-SVI Percentile</b> | <b>SVI Percentile</b> |
|--------------------|---------------------------|----------------------|---------------------------|-----------------------|
| 18127              | Porter, IN                | -0.38                | 19.61                     | 14.78                 |
| 18129              | Posey, IN                 | -0.357               | 21.46                     | 1.05                  |
| 18131              | Pulaski, IN               | 0.001                | 54.92                     | 23.09                 |
| 18133              | Putnam, IN                | -0.136               | 42.22                     | 34.84                 |
| 18135              | Randolph, IN              | -0.08                | 47.44                     | 42.96                 |
| 18137              | Ripley, IN                | -0.346               | 22.54                     | 37.74                 |
| 18139              | Rush, IN                  | -0.148               | 41.16                     | 25.67                 |
| 18141              | St. Joseph, IN            | -0.216               | 34.8                      | 62.23                 |
| 18143              | Scott, IN                 | 0.073                | 61.06                     | 42.01                 |
| 18145              | Shelby, IN                | -0.361               | 21.2                      | 21.82                 |
| 18147              | Spencer, IN               | -0.268               | 29.74                     | 8.79                  |
| 18149              | Starke, IN                | -0.016               | 53.07                     | 34.17                 |
| 18151              | Steuben, IN               | -0.207               | 35.82                     | 27.1                  |
| 18153              | Sullivan, IN              | 0.117                | 64.79                     | 64.01                 |
| 18155              | Switzerland, IN           | 0.003                | 54.98                     | 62.71                 |
| 18157              | Tippecanoe, IN            | -0.134               | 42.47                     | 49.3                  |
| 18159              | Tipton, IN                | -0.242               | 32.35                     | 7.26                  |
| 18161              | Union, IN                 | -0.282               | 28.65                     | 17.13                 |
| 18163              | Vanderburgh, IN           | -0.176               | 38.87                     | 52.42                 |
| 18165              | Vermillion, IN            | -0.111               | 44.54                     | 45.03                 |
| 18167              | Vigo, IN                  | 0.157                | 67.21                     | 72.74                 |
| 18169              | Wabash, IN                | -0.222               | 34.16                     | 28.82                 |
| 18171              | Warren, IN                | -0.316               | 25.34                     | 7.8                   |
| 18173              | Warrick, IN               | -0.584               | 5.7                       | 6.78                  |
| 18175              | Washington, IN            | 0.047                | 59.06                     | 37.77                 |
| 18177              | Wayne, IN                 | -0.064               | 48.87                     | 71.05                 |
| 18179              | Wells, IN                 | -0.494               | 10.44                     | 14.39                 |
| 18181              | White, IN                 | -0.217               | 34.7                      | 24.39                 |
| 18183              | Whitley, IN               | -0.425               | 15.38                     | 3.15                  |
| 19001              | Adair, IA                 | -0.343               | 22.92                     | 5.38                  |
| 19003              | Adams, IA                 | -0.372               | 20.34                     | 3.76                  |
| 19005              | Allamakee, IA             | -0.404               | 17.03                     | 32.2                  |
| 19007              | Appanoose, IA             | -0.142               | 41.77                     | 37.83                 |
| 19009              | Audubon, IA               | -0.397               | 17.67                     | 2.26                  |
| 19011              | Benton, IA                | -0.617               | 4.33                      | 1.18                  |
| 19013              | Black Hawk, IA            | -0.273               | 29.35                     | 42.64                 |
| 19015              | Boone, IA                 | -0.422               | 15.66                     | 11.78                 |
| 19017              | Bremer, IA                | -0.538               | 8.25                      | 3.22                  |
| 19019              | Buchanan, IA              | -0.695               | 2.13                      | 6.62                  |
| 19021              | Buena Vista, IA           | -0.365               | 20.95                     | 74.08                 |
| 19023              | Butler, IA                | -0.51                | 9.55                      | 2.36                  |
| 19025              | Calhoun, IA               | -0.449               | 13.44                     | 15.8                  |
| 19027              | Carroll, IA               | -0.678               | 2.42                      | 4.55                  |
| 19029              | Cass, IA                  | -0.428               | 15.19                     | 19.81                 |
| 19031              | Cedar, IA                 | -0.586               | 5.67                      | 0.8                   |
| 19033              | Cerro Gordo, IA           | -0.355               | 21.84                     | 24.97                 |
| 19035              | Cherokee, IA              | -0.481               | 11.43                     | 17.01                 |
| 19037              | Chickasaw, IA             | -0.578               | 5.95                      | 5.99                  |
| 19039              | Clarke, IA                | -0.443               | 13.79                     | 48.47                 |
| 19041              | Clay, IA                  | -0.429               | 15.12                     | 34.39                 |
| 19043              | Clayton, IA               | -0.519               | 9.2                       | 18.41                 |
| 19045              | Clinton, IA               | -0.352               | 22.13                     | 26.46                 |
| 19047              | Crawford, IA              | -0.067               | 48.52                     | 85.51                 |
| 19049              | Dallas, IA                | -0.914               | 0.73                      | 5.96                  |
| 19051              | Davis, IA                 | -1.003               | 0.41                      | 35.03                 |

| <b>County FIPS</b> | <b>County Description</b> | <b>DOS-SVI Index</b> | <b>DOS-SVI Percentile</b> | <b>SVI Percentile</b> |
|--------------------|---------------------------|----------------------|---------------------------|-----------------------|
| 19053              | Decatur, IA               | -0.16                | 40.31                     | 68.22                 |
| 19055              | Delaware, IA              | -0.622               | 4.08                      | 3.44                  |
| 19057              | Des Moines, IA            | -0.187               | 37.79                     | 46.53                 |
| 19059              | Dickinson, IA             | -0.381               | 19.39                     | 9.17                  |
| 19061              | Dubuque, IA               | -0.446               | 13.56                     | 23.47                 |
| 19063              | Emmet, IA                 | -0.352               | 22.06                     | 39.46                 |
| 19065              | Fayette, IA               | -0.31                | 26.14                     | 22.52                 |
| 19067              | Floyd, IA                 | -0.418               | 15.95                     | 35.96                 |
| 19069              | Franklin, IA              | -0.401               | 17.32                     | 19.62                 |
| 19071              | Fremont, IA               | -0.413               | 16.33                     | 5.54                  |
| 19073              | Greene, IA                | -0.371               | 20.38                     | 19.78                 |
| 19075              | Grundy, IA                | -0.724               | 1.82                      | 0.38                  |
| 19077              | Guthrie, IA               | -0.422               | 15.57                     | 12.2                  |
| 19079              | Hamilton, IA              | -0.483               | 11.24                     | 11.53                 |
| 19081              | Hancock, IA               | -0.561               | 6.78                      | 7.13                  |
| 19083              | Hardin, IA                | -0.57                | 6.34                      | 12.42                 |
| 19085              | Harrison, IA              | -0.591               | 5.38                      | 6.46                  |
| 19087              | Henry, IA                 | -0.192               | 37.25                     | 31.34                 |
| 19089              | Howard, IA                | -0.61                | 4.68                      | 15.67                 |
| 19091              | Humboldt, IA              | -0.42                | 15.82                     | 14.46                 |
| 19093              | Ida, IA                   | -0.445               | 13.72                     | 8.66                  |
| 19095              | Iowa, IA                  | -0.563               | 6.59                      | 3.47                  |
| 19097              | Jackson, IA               | -0.355               | 21.62                     | 12.68                 |
| 19099              | Jasper, IA                | -0.326               | 24.16                     | 25.48                 |
| 19101              | Jefferson, IA             | 0.038                | 58.33                     | 48.95                 |
| 19103              | Johnson, IA               | -0.397               | 17.77                     | 26.75                 |
| 19105              | Jones, IA                 | -0.396               | 17.92                     | 19.24                 |
| 19107              | Keokuk, IA                | -0.285               | 28.46                     | 3.98                  |
| 19109              | Kossuth, IA               | -0.422               | 15.63                     | 10.48                 |
| 19111              | Lee, IA                   | -0.011               | 53.65                     | 50.41                 |
| 19113              | Linn, IA                  | -0.549               | 7.61                      | 18.06                 |
| 19115              | Louisa, IA                | -0.227               | 33.75                     | 45.7                  |
| 19117              | Lucas, IA                 | -0.276               | 29.2                      | 27.55                 |
| 19119              | Lyon, IA                  | -0.774               | 1.3                       | 4.39                  |
| 19121              | Madison, IA               | -0.569               | 6.4                       | 2.04                  |
| 19123              | Mahaska, IA               | -0.315               | 25.5                      | 46.37                 |
| 19125              | Marion, IA                | -0.492               | 10.7                      | 19.49                 |
| 19127              | Marshall, IA              | -0.359               | 21.23                     | 68.63                 |
| 19129              | Mills, IA                 | -0.445               | 13.69                     | 10.76                 |
| 19131              | Mitchell, IA              | -0.509               | 9.62                      | 8.6                   |
| 19133              | Monona, IA                | -0.281               | 28.81                     | 17.96                 |
| 19135              | Monroe, IA                | -0.207               | 35.78                     | 25.19                 |
| 19137              | Montgomery, IA            | -0.177               | 38.81                     | 52.8                  |
| 19139              | Muscatine, IA             | -0.528               | 8.63                      | 39.04                 |
| 19141              | O'Brien, IA               | -0.635               | 3.6                       | 23.22                 |
| 19143              | Osceola, IA               | -0.567               | 6.43                      | 26.34                 |
| 19145              | Page, IA                  | -0.174               | 39.06                     | 33.41                 |
| 19147              | Palo Alto, IA             | -0.623               | 4.01                      | 17.29                 |
| 19149              | Plymouth, IA              | -0.663               | 2.8                       | 12.71                 |
| 19151              | Pocahontas, IA            | -0.378               | 19.68                     | 14.62                 |
| 19153              | Polk, IA                  | -0.508               | 9.77                      | 37.68                 |
| 19155              | Pottawattamie, IA         | -0.392               | 18.21                     | 45.99                 |
| 19157              | Poweshiek, IA             | -0.309               | 26.17                     | 15.48                 |
| 19159              | Ringgold, IA              | -0.355               | 21.87                     | 12.99                 |
| 19161              | Sac, IA                   | -0.493               | 10.57                     | 7.48                  |



| <b>County FIPS</b> | <b>County Description</b> | <b>DOS-SVI Index</b> | <b>DOS-SVI Percentile</b> | <b>SVI Percentile</b> |
|--------------------|---------------------------|----------------------|---------------------------|-----------------------|
| 19163              | Scott, IA                 | -0.455               | 13.21                     | 26.59                 |
| 19165              | Shelby, IA                | -0.516               | 9.33                      | 13.03                 |
| 19167              | Sioux, IA                 | -0.747               | 1.59                      | 22.07                 |
| 19169              | Story, IA                 | -0.104               | 45.27                     | 21.24                 |
| 19171              | Tama, IA                  | -0.437               | 14.39                     | 32.74                 |
| 19173              | Taylor, IA                | -0.327               | 24.1                      | 27.71                 |
| 19175              | Union, IA                 | -0.145               | 41.39                     | 44.55                 |
| 19177              | Van Buren, IA             | -0.342               | 23.02                     | 24.65                 |
| 19179              | Wapello, IA               | -0.144               | 41.52                     | 74.39                 |
| 19181              | Warren, IA                | -0.614               | 4.49                      | 7.2                   |
| 19183              | Washington, IA            | -0.462               | 12.77                     | 22.39                 |
| 19185              | Wayne, IA                 | -0.591               | 5.41                      | 45.83                 |
| 19187              | Webster, IA               | -0.222               | 34.13                     | 45.8                  |
| 19189              | Winnebago, IA             | -0.306               | 26.46                     | 20.61                 |
| 19191              | Winneshiek, IA            | -0.438               | 14.29                     | 1.15                  |
| 19193              | Woodbury, IA              | -0.392               | 18.27                     | 69.68                 |
| 19195              | Worth, IA                 | -0.34                | 23.18                     | 6.97                  |
| 19197              | Wright, IA                | -0.318               | 25.15                     | 48.03                 |
| 20001              | Allen, KS                 | -0.078               | 47.79                     | 39.78                 |
| 20003              | Anderson, KS              | -0.464               | 12.61                     | 22.74                 |
| 20005              | Atchison, KS              | -0.234               | 33.08                     | 49.11                 |
| 20007              | Barber, KS                | -0.436               | 14.58                     | 28.03                 |
| 20009              | Barton, KS                | -0.233               | 33.3                      | 54.39                 |
| 20011              | Bourbon, KS               | -0.365               | 20.98                     | 58.28                 |
| 20013              | Brown, KS                 | -0.348               | 22.35                     | 27.17                 |
| 20015              | Butler, KS                | -0.504               | 10.03                     | 26.24                 |
| 20017              | Chase, KS                 | -0.235               | 32.98                     | 40.67                 |
| 20019              | Chautauqua, KS            | 0.232                | 72.62                     | 71.88                 |
| 20021              | Cherokee, KS              | -0.013               | 53.33                     | 38.28                 |
| 20023              | Cheyenne, KS              | -0.325               | 24.26                     | 10.03                 |
| 20025              | Clark, KS                 | -0.565               | 6.46                      | 31.24                 |
| 20027              | Clay, KS                  | -0.487               | 11.02                     | 4.94                  |
| 20029              | Cloud, KS                 | -0.288               | 28.18                     | 27.39                 |
| 20031              | Coffey, KS                | -0.231               | 33.43                     | 20.35                 |
| 20033              | Comanche, KS              | -0.533               | 8.47                      | 7.93                  |
| 20035              | Cowley, KS                | -0.11                | 44.7                      | 73.18                 |
| 20037              | Crawford, KS              | -0.188               | 37.73                     | 69.87                 |
| 20039              | Decatur, KS               | -0.166               | 39.64                     | 15.73                 |
| 20041              | Dickinson, KS             | -0.182               | 38.05                     | 33.22                 |
| 20043              | Doniphan, KS              | -0.06                | 49.28                     | 23.06                 |
| 20045              | Douglas, KS               | -0.19                | 37.54                     | 22.32                 |
| 20047              | Edwards, KS               | -0.346               | 22.51                     | 37.2                  |
| 20049              | Elk, KS                   | 0.287                | 76.12                     | 38.95                 |
| 20051              | Ellis, KS                 | -0.405               | 16.94                     | 15.64                 |
| 20053              | Ellsworth, KS             | -0.117               | 44.03                     | 39.52                 |
| 20055              | Finney, KS                | -0.346               | 22.48                     | 82.36                 |
| 20057              | Ford, KS                  | -0.242               | 32.38                     | 85.7                  |
| 20059              | Franklin, KS              | -0.316               | 25.47                     | 21.37                 |
| 20061              | Geary, KS                 | -0.323               | 24.48                     | 65.76                 |
| 20063              | Gove, KS                  | -0.319               | 24.96                     | 9.75                  |
| 20065              | Graham, KS                | -0.049               | 50.05                     | 12.55                 |
| 20067              | Grant, KS                 | -0.165               | 39.8                      | 38.15                 |
| 20069              | Gray, KS                  | -0.512               | 9.46                      | 27.36                 |
| 20071              | Greeley, KS               | -0.372               | 20.28                     | 57.52                 |
| 20073              | Greenwood, KS             | -0.197               | 36.84                     | 21.27                 |

| <b>County FIPS</b> | <b>County Description</b> | <b>DOS-SVI Index</b> | <b>DOS-SVI Percentile</b> | <b>SVI Percentile</b> |
|--------------------|---------------------------|----------------------|---------------------------|-----------------------|
| 20075              | Hamilton, KS              | -0.295               | 27.51                     | 25.86                 |
| 20077              | Harper, KS                | -0.299               | 27.12                     | 32.23                 |
| 20079              | Harvey, KS                | -0.408               | 16.84                     | 33.5                  |
| 20081              | Haskell, KS               | -0.436               | 14.49                     | 41.15                 |
| 20083              | Hodgeman, KS              | -0.317               | 25.28                     | 11.18                 |
| 20085              | Jackson, KS               | -0.198               | 36.74                     | 26.94                 |
| 20087              | Jefferson, KS             | -0.27                | 29.58                     | 5.48                  |
| 20089              | Jewell, KS                | -0.094               | 46.32                     | 8.76                  |
| 20091              | Johnson, KS               | -0.74                | 1.66                      | 6.15                  |
| 20093              | Kearny, KS                | -0.053               | 49.76                     | 46.56                 |
| 20095              | Kingman, KS               | -0.293               | 27.7                      | 5.13                  |
| 20097              | Kiowa, KS                 | -0.376               | 19.87                     | 25.8                  |
| 20099              | Labette, KS               | -0.179               | 38.46                     | 63.92                 |
| 20101              | Lane, KS                  | -0.443               | 13.82                     | 3.03                  |
| 20103              | Leavenworth, KS           | -0.415               | 16.17                     | 24.04                 |
| 20105              | Lincoln, KS               | -0.244               | 32                        | 13.22                 |
| 20107              | Linn, KS                  | 0.003                | 55.01                     | 44.78                 |
| 20109              | Logan, KS                 | -0.551               | 7.48                      | 12.96                 |
| 20111              | Lyon, KS                  | -0.098               | 46.04                     | 73.22                 |
| 20113              | McPherson, KS             | -0.48                | 11.53                     | 10.67                 |
| 20115              | Marion, KS                | -0.217               | 34.77                     | 17.71                 |
| 20117              | Marshall, KS              | -0.384               | 19.07                     | 12.64                 |
| 20119              | Meade, KS                 | -0.41                | 16.68                     | 37.17                 |
| 20121              | Miami, KS                 | -0.587               | 5.57                      | 2.58                  |
| 20123              | Mitchell, KS              | -0.355               | 21.68                     | 28.44                 |
| 20125              | Montgomery, KS            | -0.025               | 52.28                     | 80.29                 |
| 20127              | Morris, KS                | -0.265               | 30.05                     | 24.36                 |
| 20129              | Morton, KS                | -0.17                | 39.35                     | 40.8                  |
| 20131              | Nemaha, KS                | -0.629               | 3.73                      | 9.62                  |
| 20133              | Neosho, KS                | -0.249               | 31.42                     | 65.8                  |
| 20135              | Ness, KS                  | -0.306               | 26.52                     | 15                    |
| 20137              | Norton, KS                | -0.341               | 23.11                     | 29.75                 |
| 20139              | Osage, KS                 | -0.125               | 43.23                     | 23.41                 |
| 20141              | Osborne, KS               | -0.276               | 29.16                     | 7.23                  |
| 20143              | Ottawa, KS                | -0.452               | 13.4                      | 2.71                  |
| 20145              | Pawnee, KS                | -0.1                 | 45.72                     | 28.66                 |
| 20147              | Phillips, KS              | -0.464               | 12.54                     | 24.2                  |
| 20149              | Pottawatomie, KS          | -0.625               | 3.92                      | 14.87                 |
| 20151              | Pratt, KS                 | -0.525               | 8.79                      | 38.73                 |
| 20153              | Rawlins, KS               | -0.371               | 20.47                     | 13.6                  |
| 20155              | Reno, KS                  | -0.287               | 28.3                      | 58.66                 |
| 20157              | Republic, KS              | -0.423               | 15.47                     | 6.05                  |
| 20159              | Rice, KS                  | -0.069               | 48.36                     | 42.52                 |
| 20161              | Riley, KS                 | 0.005                | 55.27                     | 43.73                 |
| 20163              | Rooks, KS                 | -0.302               | 26.84                     | 14.2                  |
| 20165              | Rush, KS                  | -0.218               | 34.51                     | 7.83                  |
| 20167              | Russell, KS               | -0.09                | 46.7                      | 23.92                 |
| 20169              | Saline, KS                | -0.363               | 21.08                     | 41.62                 |
| 20171              | Scott, KS                 | -0.542               | 8.02                      | 30.61                 |
| 20173              | Sedgwick, KS              | -0.319               | 25.02                     | 53.57                 |
| 20175              | Seward, KS                | -0.23                | 33.49                     | 91.11                 |
| 20177              | Shawnee, KS               | -0.376               | 19.83                     | 50.99                 |
| 20179              | Sheridan, KS              | -0.608               | 4.78                      | 6.85                  |
| 20181              | Sherman, KS               | -0.086               | 46.83                     | 49.84                 |
| 20183              | Smith, KS                 | -0.226               | 33.91                     | 5.03                  |

| <b>County FIPS</b> | <b>County Description</b> | <b>DOS-SVI Index</b> | <b>DOS-SVI Percentile</b> | <b>SVI Percentile</b> |
|--------------------|---------------------------|----------------------|---------------------------|-----------------------|
| 20185              | Stafford, KS              | -0.214               | 35.12                     | 27.77                 |
| 20187              | Stanton, KS               | -0.045               | 50.27                     | 49.65                 |
| 20189              | Stevens, KS               | -0.092               | 46.48                     | 67.39                 |
| 20191              | Sumner, KS                | -0.326               | 24.23                     | 22.23                 |
| 20193              | Thomas, KS                | -0.355               | 21.81                     | 7.04                  |
| 20195              | Trego, KS                 | -0.411               | 16.49                     | 3.89                  |
| 20197              | Wabaunsee, KS             | -0.512               | 9.42                      | 5.32                  |
| 20199              | Wallace, KS               | -0.322               | 24.71                     | 14.3                  |
| 20201              | Washington, KS            | -0.346               | 22.57                     | 14.81                 |
| 20203              | Wichita, KS               | -0.308               | 26.33                     | 46.78                 |
| 20205              | Wilson, KS                | -0.047               | 50.11                     | 63.66                 |
| 20207              | Woodson, KS               | 0.42                 | 83.19                     | 43.98                 |
| 20209              | Wyandotte, KS             | 0.02                 | 56.29                     | 92.42                 |
| 21001              | Adair, KY                 | 0.356                | 79.88                     | 71.21                 |
| 21003              | Allen, KY                 | 0.187                | 69.69                     | 67.96                 |
| 21005              | Anderson, KY              | -0.029               | 51.8                      | 26.37                 |
| 21007              | Ballard, KY               | 0.029                | 57.05                     | 44.59                 |
| 21009              | Barren, KY                | 0.265                | 74.78                     | 77.61                 |
| 21011              | Bath, KY                  | 0.518                | 87.65                     | 72.9                  |
| 21013              | Bell, KY                  | 1.036                | 97.8                      | 89.27                 |
| 21015              | Boone, KY                 | -0.553               | 7.29                      | 12.77                 |
| 21017              | Bourbon, KY               | -0.012               | 53.49                     | 55.61                 |
| 21019              | Boyd, KY                  | 0.359                | 80.07                     | 69.08                 |
| 21021              | Boyle, KY                 | -0.04                | 50.88                     | 43.15                 |
| 21023              | Bracken, KY               | -0.044               | 50.46                     | 38.66                 |
| 21025              | Breathitt, KY             | 1.24                 | 99.11                     | 82.2                  |
| 21027              | Breckinridge, KY          | 0.369                | 80.77                     | 73.76                 |
| 21029              | Bullitt, KY               | -0.201               | 36.36                     | 13.85                 |
| 21031              | Butler, KY                | 0.339                | 78.8                      | 79.2                  |
| 21033              | Caldwell, KY              | 0.012                | 55.87                     | 49.81                 |
| 21035              | Calloway, KY              | 0.191                | 69.88                     | 49.97                 |
| 21037              | Campbell, KY              | -0.368               | 20.76                     | 21.88                 |
| 21039              | Carlisle, KY              | 0.159                | 67.4                      | 33.95                 |
| 21041              | Carroll, KY               | 0.261                | 74.44                     | 89.04                 |
| 21043              | Carter, KY                | 0.613                | 90.77                     | 82.04                 |
| 21045              | Casey, KY                 | 0.741                | 94.43                     | 76.56                 |
| 21047              | Christian, KY             | 0.094                | 62.91                     | 91.27                 |
| 21049              | Clark, KY                 | -0.03                | 51.73                     | 60.61                 |
| 21051              | Clay, KY                  | 1.128                | 98.5                      | 90.99                 |
| 21053              | Clinton, KY               | 0.465                | 85.29                     | 77.8                  |
| 21055              | Crittenden, KY            | 0.032                | 57.43                     | 48.44                 |
| 21057              | Cumberland, KY            | 0.11                 | 63.96                     | 53.15                 |
| 21059              | Daviess, KY               | -0.247               | 31.65                     | 61.69                 |
| 21061              | Edmonson, KY              | 0.737                | 94.36                     | 63.57                 |
| 21063              | Elliott, KY               | 0.918                | 96.53                     | 72.39                 |
| 21065              | Estill, KY                | 1.033                | 97.77                     | 79.97                 |
| 21067              | Fayette, KY               | -0.182               | 38.08                     | 48.76                 |
| 21069              | Fleming, KY               | 0.346                | 79.31                     | 77.1                  |
| 21071              | Floyd, KY                 | 1.106                | 98.31                     | 85.03                 |
| 21073              | Franklin, KY              | -0.104               | 45.24                     | 54.68                 |
| 21075              | Fulton, KY                | 0.344                | 79.18                     | 87.04                 |
| 21077              | Gallatin, KY              | 0.1                  | 63.39                     | 61.24                 |
| 21079              | Garrard, KY               | 0.063                | 60.27                     | 42.99                 |
| 21081              | Grant, KY                 | -0.164               | 40.02                     | 56.02                 |
| 21083              | Graves, KY                | 0.136                | 65.74                     | 77.52                 |

| <b>County FIPS</b> | <b>County Description</b> | <b>DOS-SVI Index</b> | <b>DOS-SVI Percentile</b> | <b>SVI Percentile</b> |
|--------------------|---------------------------|----------------------|---------------------------|-----------------------|
| 21085              | Grayson, KY               | 0.189                | 69.79                     | 60.96                 |
| 21087              | Green, KY                 | 0.273                | 75.26                     | 52.26                 |
| 21089              | Greenup, KY               | 0.274                | 75.39                     | 32.17                 |
| 21091              | Hancock, KY               | 0.034                | 57.75                     | 38.22                 |
| 21093              | Hardin, KY                | -0.094               | 46.39                     | 56.72                 |
| 21095              | Harlan, KY                | 0.95                 | 96.94                     | 88.03                 |
| 21097              | Harrison, KY              | 0.011                | 55.81                     | 50.57                 |
| 21099              | Hart, KY                  | 0.266                | 74.85                     | 76.59                 |
| 21101              | Henderson, KY             | -0.019               | 52.66                     | 70.89                 |
| 21103              | Henry, KY                 | 0.034                | 57.78                     | 52.74                 |
| 21105              | Hickman, KY               | 0.329                | 78.32                     | 57.39                 |
| 21107              | Hopkins, KY               | 0.05                 | 59.31                     | 55.41                 |
| 21109              | Jackson, KY               | 0.924                | 96.59                     | 66.62                 |
| 21111              | Jefferson, KY             | -0.216               | 34.83                     | 56.82                 |
| 21113              | Jessamine, KY             | -0.168               | 39.54                     | 52.01                 |
| 21115              | Johnson, KY               | 0.656                | 92.2                      | 81.02                 |
| 21117              | Kenton, KY                | -0.391               | 18.31                     | 33.79                 |
| 21119              | Knott, KY                 | 1.198                | 99.01                     | 85.48                 |
| 21121              | Knox, KY                  | 0.542                | 88.63                     | 83.25                 |
| 21123              | Larue, KY                 | 0.193                | 70.07                     | 53.18                 |
| 21125              | Laurel, KY                | 0.415                | 83                        | 75.22                 |
| 21127              | Lawrence, KY              | 0.765                | 94.84                     | 75.83                 |
| 21129              | Lee, KY                   | 1.042                | 97.83                     | 81.82                 |
| 21131              | Leslie, KY                | 1.172                | 98.89                     | 77.45                 |
| 21133              | Letcher, KY               | 1.146                | 98.63                     | 87.55                 |
| 21135              | Lewis, KY                 | 0.586                | 90.03                     | 62.42                 |
| 21137              | Lincoln, KY               | 0.302                | 77.14                     | 70.83                 |
| 21139              | Livingston, KY            | 0.166                | 67.91                     | 26.4                  |
| 21141              | Logan, KY                 | -0.066               | 48.74                     | 52.87                 |
| 21143              | Lyon, KY                  | 0.283                | 76                        | 32.52                 |
| 21145              | McCracken, KY             | -0.194               | 37.12                     | 41.53                 |
| 21147              | McCreary, KY              | 1.474                | 99.68                     | 87.8                  |
| 21149              | McLean, KY                | 0.112                | 64.28                     | 42.17                 |
| 21151              | Madison, KY               | 0.155                | 67.11                     | 49.68                 |
| 21153              | Magoffin, KY              | 1.215                | 99.05                     | 80.57                 |
| 21155              | Marion, KY                | 0.363                | 80.29                     | 90.57                 |
| 21157              | Marshall, KY              | 0.007                | 55.56                     | 27.23                 |
| 21159              | Martin, KY                | 1.392                | 99.59                     | 84.94                 |
| 21161              | Mason, KY                 | -0.023               | 52.37                     | 66.82                 |
| 21163              | Meade, KY                 | 0.019                | 56.26                     | 31.78                 |
| 21165              | Menifee, KY               | 0.422                | 83.25                     | 58.47                 |
| 21167              | Mercer, KY                | 0.221                | 71.89                     | 41.34                 |
| 21169              | Metcalfe, KY              | 0.412                | 82.81                     | 68.12                 |
| 21171              | Monroe, KY                | 0.394                | 81.95                     | 69.75                 |
| 21173              | Montgomery, KY            | 0.23                 | 72.4                      | 79.87                 |
| 21175              | Morgan, KY                | 0.775                | 95.06                     | 82.93                 |
| 21177              | Muhlenberg, KY            | 0.547                | 88.67                     | 61.34                 |
| 21179              | Nelson, KY                | -0.242               | 32.28                     | 28.95                 |
| 21181              | Nicholas, KY              | 0.381                | 81.41                     | 81.97                 |
| 21183              | Ohio, KY                  | 0.438                | 83.86                     | 57.99                 |
| 21185              | Oldham, KY                | -0.747               | 1.56                      | 3.95                  |
| 21187              | Owen, KY                  | 0.11                 | 63.93                     | 52.64                 |
| 21189              | Owsley, KY                | 1.06                 | 97.93                     | 84.14                 |
| 21191              | Pendleton, KY             | 0.085                | 62.18                     | 41.5                  |
| 21193              | Perry, KY                 | 1.071                | 98.03                     | 90.51                 |

| <b>County FIPS</b> | <b>County Description</b> | <b>DOS-SVI Index</b> | <b>DOS-SVI Percentile</b> | <b>SVI Percentile</b> |
|--------------------|---------------------------|----------------------|---------------------------|-----------------------|
| 21195              | Pike, KY                  | 0.89                 | 96.24                     | 79.08                 |
| 21197              | Powell, KY                | 0.351                | 79.59                     | 77.32                 |
| 21199              | Pulaski, KY               | 0.438                | 83.73                     | 74.2                  |
| 21201              | Robertson, KY             | 0.346                | 79.34                     | 35.38                 |
| 21203              | Rockcastle, KY            | 0.628                | 91.31                     | 78.82                 |
| 21205              | Rowan, KY                 | 0.368                | 80.64                     | 75.57                 |
| 21207              | Russell, KY               | 0.484                | 86.12                     | 86.34                 |
| 21209              | Scott, KY                 | -0.466               | 12.45                     | 33.31                 |
| 21211              | Shelby, KY                | -0.292               | 27.76                     | 42.61                 |
| 21213              | Simpson, KY               | -0.252               | 31.14                     | 28.79                 |
| 21215              | Spencer, KY               | -0.301               | 27                        | 3.69                  |
| 21217              | Taylor, KY                | 0.192                | 70.01                     | 72.1                  |
| 21219              | Todd, KY                  | -0.078               | 47.76                     | 80.92                 |
| 21221              | Trigg, KY                 | 0.277                | 75.61                     | 36.5                  |
| 21223              | Trimble, KY               | 0.499                | 86.66                     | 71.43                 |
| 21225              | Union, KY                 | 0.493                | 86.44                     | 53.66                 |
| 21227              | Warren, KY                | -0.14                | 41.87                     | 70.96                 |
| 21229              | Washington, KY            | 0.025                | 56.73                     | 51.27                 |
| 21231              | Wayne, KY                 | 0.519                | 87.68                     | 74.78                 |
| 21233              | Webster, KY               | 0.258                | 74.21                     | 78.54                 |
| 21235              | Whitley, KY               | 0.538                | 88.41                     | 83.79                 |
| 21237              | Wolfe, KY                 | 1.481                | 99.71                     | 86.21                 |
| 21239              | Woodford, KY              | -0.376               | 19.93                     | 20.41                 |
| 22001              | Acadia, LA                | 0.365                | 80.45                     | 91.82                 |
| 22003              | Allen, LA                 | 0.48                 | 85.99                     | 92.61                 |
| 22005              | Ascension, LA             | -0.2                 | 36.52                     | 39.68                 |
| 22007              | Assumption, LA            | 0.53                 | 88                        | 77.9                  |
| 22009              | Avoyelles, LA             | 0.395                | 81.98                     | 96.34                 |
| 22011              | Beauregard, LA            | 0.357                | 79.94                     | 65.19                 |
| 22013              | Bienville, LA             | 0.465                | 85.42                     | 94.01                 |
| 22015              | Bossier, LA               | -0.102               | 45.56                     | 58.76                 |
| 22017              | Caddo, LA                 | 0.154                | 66.98                     | 83.85                 |
| 22019              | Calcasieu, LA             | -0.02                | 52.63                     | 73.92                 |
| 22021              | Caldwell, LA              | 0.455                | 84.81                     | 93.31                 |
| 22023              | Cameron, LA               | 0.046                | 58.96                     | 26.43                 |
| 22025              | Catahoula, LA             | 0.37                 | 80.87                     | 78.06                 |
| 22027              | Claiborne, LA             | 0.948                | 96.91                     | 94.78                 |
| 22029              | Concordia, LA             | 0.294                | 76.63                     | 91.34                 |
| 22031              | De Soto, LA               | 0.6                  | 90.32                     | 89.17                 |
| 22033              | East Baton Rouge, LA      | -0.003               | 54.51                     | 66.53                 |
| 22035              | East Carroll, LA          | 0.763                | 94.81                     | 93.57                 |
| 22037              | East Feliciana, LA        | 0.465                | 85.48                     | 81.85                 |
| 22039              | Evangeline, LA            | 0.807                | 95.48                     | 99.75                 |
| 22041              | Franklin, LA              | 0.643                | 91.69                     | 95.19                 |
| 22043              | Grant, LA                 | 0.503                | 86.82                     | 62.74                 |
| 22045              | Iberia, LA                | 0.349                | 79.53                     | 96.05                 |
| 22047              | Iberville, LA             | 0.373                | 80.99                     | 88.6                  |
| 22049              | Jackson, LA               | 0.465                | 85.32                     | 93.82                 |
| 22051              | Jefferson, LA             | -0.073               | 48.04                     | 61.21                 |
| 22053              | Jefferson Davis, LA       | 0.213                | 71.19                     | 81.05                 |
| 22055              | Lafayette, LA             | -0.201               | 36.39                     | 62.17                 |
| 22057              | Lafourche, LA             | 0.135                | 65.62                     | 76.69                 |
| 22059              | LaSalle, LA               | 0.183                | 69.25                     | 76.34                 |
| 22061              | Lincoln, LA               | 0.396                | 82.04                     | 84.78                 |
| 22063              | Livingston, LA            | -0.24                | 32.51                     | 43.09                 |

| <b>County FIPS</b> | <b>County Description</b> | <b>DOS-SVI Index</b> | <b>DOS-SVI Percentile</b> | <b>SVI Percentile</b> |
|--------------------|---------------------------|----------------------|---------------------------|-----------------------|
| 22065              | Madison, LA               | 0.617                | 90.86                     | 96.97                 |
| 22067              | Morehouse, LA             | 0.261                | 74.4                      | 88.47                 |
| 22069              | Natchitoches, LA          | 0.914                | 96.5                      | 85.73                 |
| 22071              | Orleans, LA               | 0.165                | 67.88                     | 74.49                 |
| 22073              | Ouachita, LA              | 0.058                | 59.88                     | 85.22                 |
| 22075              | Plaquemines, LA           | -0.079               | 47.66                     | 70.61                 |
| 22077              | Pointe Coupee, LA         | 0.434                | 83.57                     | 84.75                 |
| 22079              | Rapides, LA               | 0.112                | 64.34                     | 90.86                 |
| 22081              | Red River, LA             | 0.35                 | 79.56                     | 81.37                 |
| 22083              | Richland, LA              | 0.231                | 72.49                     | 85.54                 |
| 22085              | Sabine, LA                | 0.608                | 90.61                     | 83.15                 |
| 22087              | St. Bernard, LA           | 0.195                | 70.26                     | 77.13                 |
| 22089              | St. Charles, LA           | -0.269               | 29.7                      | 35.29                 |
| 22091              | St. Helena, LA            | 1.083                | 98.22                     | 90                    |
| 22093              | St. James, LA             | 0.057                | 59.79                     | 62.99                 |
| 22095              | St. John the Baptist, LA  | 0.113                | 64.37                     | 74.68                 |
| 22097              | St. Landry, LA            | 0.166                | 67.94                     | 92.2                  |
| 22099              | St. Martin, LA            | 0.163                | 67.65                     | 78.31                 |
| 22101              | St. Mary, LA              | 0.398                | 82.2                      | 91.62                 |
| 22103              | St. Tammany, LA           | -0.23                | 33.46                     | 31.05                 |
| 22105              | Tangipahoa, LA            | 0.439                | 83.95                     | 88.85                 |
| 22107              | Tensas, LA                | 1.055                | 97.9                      | 83.66                 |
| 22109              | Terrebonne, LA            | 0.125                | 64.98                     | 89.52                 |
| 22111              | Union, LA                 | 0.286                | 76.03                     | 80.8                  |
| 22113              | Vermilion, LA             | 0.153                | 66.79                     | 82.01                 |
| 22115              | Vernon, LA                | 0.312                | 77.62                     | 74.33                 |
| 22117              | Washington, LA            | 0.788                | 95.16                     | 99.62                 |
| 22119              | Webster, LA               | 0.321                | 77.94                     | 87.9                  |
| 22121              | West Baton Rouge, LA      | 0.035                | 57.88                     | 76.11                 |
| 22123              | West Carroll, LA          | 0.646                | 91.82                     | 66.85                 |
| 22125              | West Feliciana, LA        | 0.527                | 87.9                      | 69.01                 |
| 22127              | Winn, LA                  | 0.47                 | 85.67                     | 77.55                 |
| 23001              | Androscoggin, ME          | -0.247               | 31.71                     | 55.67                 |
| 23003              | Aroostook, ME             | 0.148                | 66.51                     | 59.46                 |
| 23005              | Cumberland, ME            | -0.493               | 10.6                      | 13.63                 |
| 23007              | Franklin, ME              | -0.044               | 50.43                     | 21.5                  |
| 23009              | Hancock, ME               | -0.234               | 33.11                     | 19.3                  |
| 23011              | Kennebec, ME              | -0.166               | 39.67                     | 37.87                 |
| 23013              | Knox, ME                  | -0.233               | 33.14                     | 14.75                 |
| 23015              | Lincoln, ME               | -0.116               | 44.22                     | 11.43                 |
| 23017              | Oxford, ME                | 0.088                | 62.46                     | 37.26                 |
| 23019              | Penobscot, ME             | 0.018                | 56.19                     | 45.32                 |
| 23021              | Piscataquis, ME           | 0.439                | 83.99                     | 48.98                 |
| 23023              | Sagadahoc, ME             | -0.419               | 15.92                     | 5.22                  |
| 23025              | Somerset, ME              | 0.301                | 77.05                     | 62.2                  |
| 23027              | Waldo, ME                 | -0.045               | 50.24                     | 21.97                 |
| 23029              | Washington, ME            | 0.29                 | 76.31                     | 64.39                 |
| 23031              | York, ME                  | -0.335               | 23.56                     | 9.36                  |
| 24001              | Allegany, MD              | 0.25                 | 73.67                     | 62.1                  |
| 24003              | Anne Arundel, MD          | -0.469               | 12.26                     | 17.83                 |
| 24005              | Baltimore, MD             | -0.308               | 26.36                     | 38.18                 |
| 24009              | Calvert, MD               | -0.446               | 13.66                     | 4.71                  |
| 24011              | Caroline, MD              | -0.204               | 36.17                     | 55.35                 |
| 24013              | Carroll, MD               | -0.6                 | 5                         | 4.04                  |
| 24015              | Cecil, MD                 | -0.326               | 24.2                      | 29.33                 |

| <b>County FIPS</b> | <b>County Description</b> | <b>DOS-SVI Index</b> | <b>DOS-SVI Percentile</b> | <b>SVI Percentile</b> |
|--------------------|---------------------------|----------------------|---------------------------|-----------------------|
| 24017              | Charles, MD               | -0.507               | 9.87                      | 17.23                 |
| 24019              | Dorchester, MD            | 0.114                | 64.47                     | 75.06                 |
| 24021              | Frederick, MD             | -0.487               | 11.11                     | 15.89                 |
| 24023              | Garrett, MD               | -0.205               | 35.94                     | 18.12                 |
| 24025              | Harford, MD               | -0.436               | 14.55                     | 9.33                  |
| 24027              | Howard, MD                | -0.657               | 3.02                      | 13.06                 |
| 24029              | Kent, MD                  | -0.154               | 40.85                     | 42.77                 |
| 24031              | Montgomery, MD            | -0.543               | 7.99                      | 32.55                 |
| 24033              | Prince George's, MD       | -0.177               | 38.78                     | 62.61                 |
| 24035              | Queen Anne's, MD          | -0.615               | 4.42                      | 2.2                   |
| 24037              | St. Mary's, MD            | -0.492               | 10.66                     | 20.86                 |
| 24039              | Somerset, MD              | 0.58                 | 89.78                     | 89.78                 |
| 24041              | Talbot, MD                | -0.355               | 21.78                     | 13.31                 |
| 24043              | Washington, MD            | -0.118               | 43.94                     | 61.4                  |
| 24045              | Wicomico, MD              | -0.085               | 46.9                      | 77.39                 |
| 24047              | Worcester, MD             | -0.006               | 54.12                     | 28.03                 |
| 24510              | Baltimore City, MD        | 0                    | 54.82                     | 83.12                 |
| 25001              | Barnstable, MA            | -0.319               | 24.99                     | 5.64                  |
| 25003              | Berkshire, MA             | -0.122               | 43.65                     | 40.83                 |
| 25005              | Bristol, MA               | -0.254               | 31.04                     | 52.48                 |
| 25007              | Dukes, MA                 | -0.577               | 5.99                      | 0.96                  |
| 25009              | Essex, MA                 | -0.415               | 16.2                      | 50.8                  |
| 25011              | Franklin, MA              | -0.209               | 35.5                      | 20.96                 |
| 25013              | Hampden, MA               | -0.074               | 47.85                     | 82.32                 |
| 25015              | Hampshire, MA             | -0.114               | 44.38                     | 23.25                 |
| 25017              | Middlesex, MA             | -0.583               | 5.76                      | 22.64                 |
| 25019              | Nantucket, MA             | -0.711               | 1.91                      | 2.68                  |
| 25021              | Norfolk, MA               | -0.57                | 6.3                       | 20.92                 |
| 25023              | Plymouth, MA              | -0.432               | 14.74                     | 23.03                 |
| 25025              | Suffolk, MA               | -0.281               | 28.72                     | 73.79                 |
| 25027              | Worcester, MA             | -0.386               | 18.78                     | 40.96                 |
| 26001              | Alcona, MI                | 0.635                | 91.56                     | 25.57                 |
| 26003              | Alger, MI                 | 0.215                | 71.41                     | 44.81                 |
| 26005              | Allegan, MI               | -0.496               | 10.31                     | 17.58                 |
| 26007              | Alpena, MI                | 0.013                | 55.91                     | 34.08                 |
| 26009              | Antrim, MI                | -0.091               | 46.55                     | 11.56                 |
| 26011              | Arenac, MI                | 0.503                | 86.85                     | 50.54                 |
| 26013              | Baraga, MI                | 0.216                | 71.54                     | 65.99                 |
| 26015              | Barry, MI                 | -0.356               | 21.59                     | 8.69                  |
| 26017              | Bay, MI                   | -0.009               | 53.9                      | 44.04                 |
| 26019              | Benzie, MI                | -0.107               | 44.95                     | 10.51                 |
| 26021              | Berrien, MI               | -0.093               | 46.42                     | 64.75                 |
| 26023              | Branch, MI                | -0.174               | 39.1                      | 63.15                 |
| 26025              | Calhoun, MI               | -0.011               | 53.52                     | 72.42                 |
| 26027              | Cass, MI                  | -0.018               | 52.82                     | 32.8                  |
| 26029              | Charlevoix, MI            | -0.251               | 31.2                      | 9.68                  |
| 26031              | Cheboygan, MI             | 0.295                | 76.69                     | 28.6                  |
| 26033              | Chippewa, MI              | 0.451                | 84.69                     | 72.45                 |
| 26035              | Clare, MI                 | 0.583                | 89.94                     | 77.2                  |
| 26037              | Clinton, MI               | -0.382               | 19.36                     | 4.01                  |
| 26039              | Crawford, MI              | 0.323                | 78.03                     | 36.97                 |
| 26041              | Delta, MI                 | -0.122               | 43.59                     | 35.45                 |
| 26043              | Dickinson, MI             | -0.201               | 36.42                     | 22.96                 |
| 26045              | Eaton, MI                 | -0.205               | 35.98                     | 31.31                 |
| 26047              | Emmet, MI                 | -0.302               | 26.9                      | 13.57                 |

| <b>County FIPS</b> | <b>County Description</b> | <b>DOS-SVI Index</b> | <b>DOS-SVI Percentile</b> | <b>SVI Percentile</b> |
|--------------------|---------------------------|----------------------|---------------------------|-----------------------|
| 26049              | Genesee, MI               | 0.212                | 71.12                     | 66.24                 |
| 26051              | Gladwin, MI               | 0.256                | 74.08                     | 53.98                 |
| 26053              | Gogebic, MI               | 0.054                | 59.6                      | 40.38                 |
| 26055              | Grand Traverse, MI        | -0.332               | 23.81                     | 18.03                 |
| 26057              | Gratiot, MI               | 0.153                | 66.76                     | 60.35                 |
| 26059              | Hillsdale, MI             | -0.183               | 37.95                     | 50.19                 |
| 26061              | Houghton, MI              | -0.102               | 45.3                      | 49.62                 |
| 26063              | Huron, MI                 | -0.074               | 47.98                     | 27.45                 |
| 26065              | Ingham, MI                | 0.031                | 57.34                     | 57.42                 |
| 26067              | Ionia, MI                 | -0.219               | 34.38                     | 47.8                  |
| 26069              | Iosco, MI                 | 0.355                | 79.81                     | 44.94                 |
| 26071              | Iron, MI                  | 0.077                | 61.38                     | 28.25                 |
| 26073              | Isabella, MI              | 0.343                | 79.11                     | 60.16                 |
| 26075              | Jackson, MI               | -0.049               | 50.02                     | 55.06                 |
| 26077              | Kalamazoo, MI             | -0.17                | 39.29                     | 40.7                  |
| 26079              | Kalkaska, MI              | 0.208                | 70.97                     | 50.83                 |
| 26081              | Kent, MI                  | -0.395               | 17.99                     | 47.61                 |
| 26083              | Keweenaw, MI              | -0.082               | 47.18                     | 7.87                  |
| 26085              | Lake, MI                  | 1.098                | 98.28                     | 78.18                 |
| 26087              | Lapeer, MI                | -0.157               | 40.53                     | 23.82                 |
| 26089              | Leelanau, MI              | -0.258               | 30.53                     | 2.45                  |
| 26091              | Lenawee, MI               | -0.148               | 41.2                      | 40.76                 |
| 26093              | Livingston, MI            | -0.548               | 7.64                      | 0.67                  |
| 26095              | Luce, MI                  | 0.387                | 81.6                      | 53.38                 |
| 26097              | Mackinac, MI              | 0.244                | 73.26                     | 64.52                 |
| 26099              | Macomb, MI                | -0.215               | 34.92                     | 32.96                 |
| 26101              | Manistee, MI              | 0.169                | 68.23                     | 39.97                 |
| 26103              | Marquette, MI             | -0.01                | 53.71                     | 30.57                 |
| 26105              | Mason, MI                 | -0.013               | 53.36                     | 33.76                 |
| 26107              | Mecosta, MI               | 0.236                | 72.84                     | 59.75                 |
| 26109              | Menominee, MI             | -0.117               | 43.97                     | 27.64                 |
| 26111              | Midland, MI               | -0.242               | 32.22                     | 16.18                 |
| 26113              | Missaukee, MI             | 0.058                | 59.92                     | 47.55                 |
| 26115              | Monroe, MI                | -0.283               | 28.62                     | 14.94                 |
| 26117              | Montcalm, MI              | 0.001                | 54.85                     | 61.27                 |
| 26119              | Montmorency, MI           | 0.769                | 94.91                     | 37.29                 |
| 26121              | Muskegon, MI              | 0.005                | 55.37                     | 70.35                 |
| 26123              | Newaygo, MI               | 0.168                | 68.13                     | 63.18                 |
| 26125              | Oakland, MI               | -0.389               | 18.46                     | 11.4                  |
| 26127              | Oceana, MI                | 0.128                | 65.17                     | 85.8                  |
| 26129              | Ogemaw, MI                | 0.363                | 80.23                     | 62.58                 |
| 26131              | Ontonagon, MI             | 0.312                | 77.59                     | 27.32                 |
| 26133              | Osceola, MI               | 0.131                | 65.33                     | 74.01                 |
| 26135              | Oscoda, MI                | 0.676                | 92.81                     | 66.94                 |
| 26137              | Otsego, MI                | -0.095               | 46.2                      | 36.94                 |
| 26139              | Ottawa, MI                | -0.499               | 10.28                     | 21.72                 |
| 26141              | Presque Isle, MI          | 0.368                | 80.67                     | 27.61                 |
| 26143              | Roscommon, MI             | 0.706                | 93.63                     | 46.27                 |
| 26145              | Saginaw, MI               | 0.074                | 61.19                     | 70.48                 |
| 26147              | St. Clair, MI             | -0.064               | 48.93                     | 27.9                  |
| 26149              | St. Joseph, MI            | -0.243               | 32.12                     | 65.16                 |
| 26151              | Sanilac, MI               | 0.08                 | 61.6                      | 48.34                 |
| 26153              | Schoolcraft, MI           | 0.551                | 88.83                     | 54.52                 |
| 26155              | Shiawassee, MI            | -0.229               | 33.59                     | 13.25                 |
| 26157              | Tuscola, MI               | 0.053                | 59.5                      | 39.59                 |



| <b>County FIPS</b> | <b>County Description</b> | <b>DOS-SVI Index</b> | <b>DOS-SVI Percentile</b> | <b>SVI Percentile</b> |
|--------------------|---------------------------|----------------------|---------------------------|-----------------------|
| 26159              | Van Buren, MI             | -0.074               | 47.91                     | 65.89                 |
| 26161              | Washtenaw, MI             | -0.318               | 25.12                     | 22.36                 |
| 26163              | Wayne, MI                 | 0.221                | 71.86                     | 87.23                 |
| 26165              | Wexford, MI               | -0.042               | 50.65                     | 50.35                 |
| 27001              | Aitkin, MN                | 0.093                | 62.88                     | 30.83                 |
| 27003              | Anoka, MN                 | -0.623               | 3.98                      | 14.04                 |
| 27005              | Becker, MN                | -0.4                 | 17.45                     | 29.9                  |
| 27007              | Beltrami, MN              | -0.013               | 53.26                     | 77.71                 |
| 27009              | Benton, MN                | -0.471               | 12.16                     | 43.18                 |
| 27011              | Big Stone, MN             | -0.398               | 17.64                     | 20.06                 |
| 27013              | Blue Earth, MN            | -0.267               | 29.86                     | 28.38                 |
| 27015              | Brown, MN                 | -0.59                | 5.44                      | 12.74                 |
| 27017              | Carlton, MN               | -0.339               | 23.3                      | 26.66                 |
| 27019              | Carver, MN                | -0.983               | 0.48                      | 1.24                  |
| 27021              | Cass, MN                  | -0.144               | 41.48                     | 35                    |
| 27023              | Chippewa, MN              | -0.493               | 10.51                     | 35.22                 |
| 27025              | Chisago, MN               | -0.545               | 7.9                       | 5.92                  |
| 27027              | Clay, MN                  | -0.575               | 6.14                      | 22.17                 |
| 27029              | Clearwater, MN            | 0.062                | 60.2                      | 79.17                 |
| 27031              | Cook, MN                  | -0.554               | 7.2                       | 20.29                 |
| 27033              | Cottonwood, MN            | -0.41                | 16.62                     | 47.26                 |
| 27035              | Crow Wing, MN             | -0.438               | 14.36                     | 12.23                 |
| 27037              | Dakota, MN                | -0.651               | 3.15                      | 12.07                 |
| 27039              | Dodge, MN                 | -0.772               | 1.37                      | 5.73                  |
| 27041              | Douglas, MN               | -0.488               | 10.92                     | 4.46                  |
| 27043              | Faribault, MN             | -0.427               | 15.25                     | 15.7                  |
| 27045              | Fillmore, MN              | -0.612               | 4.55                      | 21.69                 |
| 27047              | Freeborn, MN              | -0.267               | 29.77                     | 43.28                 |
| 27049              | Goodhue, MN               | -0.511               | 9.52                      | 17.07                 |
| 27051              | Grant, MN                 | -0.343               | 22.95                     | 9.46                  |
| 27053              | Hennepin, MN              | -0.543               | 7.96                      | 30.92                 |
| 27055              | Houston, MN               | -0.574               | 6.18                      | 1.85                  |
| 27057              | Hubbard, MN               | -0.332               | 23.78                     | 20.51                 |
| 27059              | Isanti, MN                | -0.478               | 11.65                     | 10.22                 |
| 27061              | Itasca, MN                | -0.195               | 37.09                     | 32.93                 |
| 27063              | Jackson, MN               | -0.553               | 7.32                      | 3.06                  |
| 27065              | Kanabec, MN               | -0.136               | 42.31                     | 28.41                 |
| 27067              | Kandiyohi, MN             | -0.501               | 10.25                     | 40.64                 |
| 27069              | Kittson, MN               | -0.441               | 13.98                     | 9.97                  |
| 27071              | Koochiching, MN           | 0.105                | 63.64                     | 43.66                 |
| 27073              | Lac qui Parle, MN         | -0.42                | 15.86                     | 10.06                 |
| 27075              | Lake, MN                  | -0.317               | 25.21                     | 11.02                 |
| 27077              | Lake of the Woods, MN     | -0.107               | 45.02                     | 15.76                 |
| 27079              | Le Sueur, MN              | -0.571               | 6.24                      | 11.46                 |
| 27081              | Lincoln, MN               | -0.475               | 11.88                     | 6.66                  |
| 27083              | Lyon, MN                  | -0.554               | 7.16                      | 45.32                 |
| 27085              | McLeod, MN                | -0.55                | 7.54                      | 12.61                 |
| 27087              | Mahnomen, MN              | -0.016               | 53.04                     | 87.17                 |
| 27089              | Marshall, MN              | -0.412               | 16.36                     | 14.11                 |
| 27091              | Martin, MN                | -0.361               | 21.17                     | 19.33                 |
| 27093              | Meeker, MN                | -0.667               | 2.71                      | 18.69                 |
| 27095              | Mille Lacs, MN            | -0.217               | 34.67                     | 59.17                 |
| 27097              | Morrison, MN              | -0.403               | 17.13                     | 26.82                 |
| 27099              | Mower, MN                 | -0.437               | 14.45                     | 62.83                 |
| 27101              | Murray, MN                | -0.469               | 12.22                     | 10.64                 |

| <b>County FIPS</b> | <b>County Description</b> | <b>DOS-SVI Index</b> | <b>DOS-SVI Percentile</b> | <b>SVI Percentile</b> |
|--------------------|---------------------------|----------------------|---------------------------|-----------------------|
| 27103              | Nicollet, MN              | -0.402               | 17.22                     | 25.13                 |
| 27105              | Nobles, MN                | -0.262               | 30.31                     | 81.5                  |
| 27107              | Norman, MN                | -0.491               | 10.76                     | 32.48                 |
| 27109              | Olmsted, MN               | -0.647               | 3.31                      | 25.99                 |
| 27111              | Otter Tail, MN            | -0.411               | 16.59                     | 20.99                 |
| 27113              | Pennington, MN            | -0.475               | 11.84                     | 30.16                 |
| 27115              | Pine, MN                  | 0.062                | 60.24                     | 46.31                 |
| 27117              | Pipestone, MN             | -0.505               | 10                        | 46.46                 |
| 27119              | Polk, MN                  | -0.397               | 17.83                     | 36.69                 |
| 27121              | Pope, MN                  | -0.458               | 13.12                     | 3.15                  |
| 27123              | Ramsey, MN                | -0.394               | 18.15                     | 63.34                 |
| 27125              | Red Lake, MN              | -0.493               | 10.54                     | 15.25                 |
| 27127              | Redwood, MN               | -0.521               | 8.98                      | 22.93                 |
| 27129              | Renville, MN              | -0.501               | 10.22                     | 19.68                 |
| 27131              | Rice, MN                  | -0.423               | 15.51                     | 39.3                  |
| 27133              | Rock, MN                  | -0.659               | 2.93                      | 15.32                 |
| 27135              | Roseau, MN                | -0.479               | 11.56                     | 24.78                 |
| 27137              | St. Louis, MN             | -0.227               | 33.78                     | 31.18                 |
| 27139              | Scott, MN                 | -0.889               | 0.86                      | 11.08                 |
| 27141              | Sherburne, MN             | -0.773               | 1.34                      | 8.85                  |
| 27143              | Sibley, MN                | -0.586               | 5.63                      | 13.15                 |
| 27145              | Stearns, MN               | -0.404               | 17                        | 38.85                 |
| 27147              | Steele, MN                | -0.561               | 6.75                      | 30.13                 |
| 27149              | Stevens, MN               | -0.46                | 12.99                     | 22.58                 |
| 27151              | Swift, MN                 | -0.414               | 16.27                     | 32.13                 |
| 27153              | Todd, MN                  | -0.399               | 17.61                     | 48.12                 |
| 27155              | Traverse, MN              | -0.306               | 26.49                     | 26.02                 |
| 27157              | Wabasha, MN               | -0.44                | 14.1                      | 5.89                  |
| 27159              | Wadena, MN                | -0.205               | 36.01                     | 65.54                 |
| 27161              | Waseca, MN                | -0.476               | 11.78                     | 25.03                 |
| 27163              | Washington, MN            | -0.761               | 1.43                      | 6.82                  |
| 27165              | Watonwan, MN              | -0.371               | 20.41                     | 51.91                 |
| 27167              | Wilkin, MN                | -0.591               | 5.32                      | 19.24                 |
| 27169              | Winona, MN                | -0.266               | 29.99                     | 21.15                 |
| 27171              | Wright, MN                | -0.827               | 1.05                      | 4.62                  |
| 27173              | Yellow Medicine, MN       | -0.442               | 13.95                     | 33.44                 |
| 28001              | Adams, MS                 | 0.851                | 96.12                     | 99.14                 |
| 28003              | Alcorn, MS                | 0.435                | 83.7                      | 69.55                 |
| 28005              | Amite, MS                 | 0.748                | 94.52                     | 81.91                 |
| 28007              | Attala, MS                | 0.628                | 91.28                     | 98.44                 |
| 28009              | Benton, MS                | 0.833                | 95.89                     | 66.05                 |
| 28011              | Bolivar, MS               | 0.74                 | 94.4                      | 96.75                 |
| 28013              | Calhoun, MS               | 0.444                | 84.21                     | 96.5                  |
| 28015              | Carroll, MS               | 0.635                | 91.53                     | 63.03                 |
| 28017              | Chickasaw, MS             | 0.351                | 79.62                     | 91.43                 |
| 28019              | Choctaw, MS               | 0.713                | 93.82                     | 85.41                 |
| 28021              | Claiborne, MS             | 1.498                | 99.81                     | 99.2                  |
| 28023              | Clarke, MS                | 0.659                | 92.42                     | 66.69                 |
| 28025              | Clay, MS                  | 0.608                | 90.58                     | 70.54                 |
| 28027              | Coahoma, MS               | 1.028                | 97.68                     | 93.22                 |
| 28029              | Copiah, MS                | 0.652                | 92.04                     | 94.11                 |
| 28031              | Covington, MS             | 0.7                  | 93.47                     | 78.79                 |
| 28033              | DeSoto, MS                | -0.344               | 22.7                      | 30.32                 |
| 28035              | Forrest, MS               | 0.558                | 89.14                     | 93.66                 |
| 28037              | Franklin, MS              | 0.358                | 80.01                     | 57.17                 |

| <b>County FIPS</b> | <b>County Description</b> | <b>DOS-SVI Index</b> | <b>DOS-SVI Percentile</b> | <b>SVI Percentile</b> |
|--------------------|---------------------------|----------------------|---------------------------|-----------------------|
| 28039              | George, MS                | 0.363                | 80.26                     | 61.37                 |
| 28041              | Greene, MS                | 0.643                | 91.75                     | 60.67                 |
| 28043              | Grenada, MS               | 0.373                | 81.03                     | 87.71                 |
| 28045              | Hancock, MS               | 0.259                | 74.34                     | 59.24                 |
| 28047              | Harrison, MS              | 0.248                | 73.61                     | 88.38                 |
| 28049              | Hinds, MS                 | 0.254                | 73.99                     | 87.42                 |
| 28051              | Holmes, MS                | 1.561                | 99.87                     | 98.18                 |
| 28053              | Humphreys, MS             | 1.239                | 99.08                     | 93.69                 |
| 28055              | Issaquena, MS             | 1.644                | 99.9                      | 95.1                  |
| 28057              | Itawamba, MS              | 0.21                 | 71.03                     | 54.87                 |
| 28059              | Jackson, MS               | 0.206                | 70.84                     | 54.33                 |
| 28061              | Jasper, MS                | 0.499                | 86.63                     | 76.91                 |
| 28063              | Jefferson, MS             | 1.003                | 97.42                     | 96.37                 |
| 28065              | Jefferson Davis, MS       | 0.836                | 95.99                     | 84.39                 |
| 28067              | Jones, MS                 | 0.221                | 71.79                     | 89.2                  |
| 28069              | Kemper, MS                | 0.654                | 92.14                     | 92.74                 |
| 28071              | Lafayette, MS             | 0.245                | 73.29                     | 50.96                 |
| 28073              | Lamar, MS                 | 0.115                | 64.63                     | 53.06                 |
| 28075              | Lauderdale, MS            | 0.242                | 73.03                     | 92.83                 |
| 28077              | Lawrence, MS              | 0.403                | 82.39                     | 66.34                 |
| 28079              | Leake, MS                 | 0.749                | 94.56                     | 99.46                 |
| 28081              | Lee, MS                   | -0.067               | 48.58                     | 79.52                 |
| 28083              | Leflore, MS               | 0.508                | 87.07                     | 96.53                 |
| 28085              | Lincoln, MS               | 0.338                | 78.67                     | 75.86                 |
| 28087              | Lowndes, MS               | 0.293                | 76.5                      | 79.75                 |
| 28089              | Madison, MS               | -0.4                 | 17.41                     | 28.98                 |
| 28091              | Marion, MS                | 0.509                | 87.2                      | 93.5                  |
| 28093              | Marshall, MS              | 0.366                | 80.48                     | 69.04                 |
| 28095              | Monroe, MS                | 0.253                | 73.96                     | 63.98                 |
| 28097              | Montgomery, MS            | 0.79                 | 95.19                     | 89.14                 |
| 28099              | Neshoba, MS               | 0.263                | 74.63                     | 96.85                 |
| 28101              | Newton, MS                | 0.336                | 78.61                     | 92.13                 |
| 28103              | Noxubee, MS               | 0.905                | 96.43                     | 98.6                  |
| 28105              | Oktibbeha, MS             | 0.597                | 90.29                     | 64.2                  |
| 28107              | Panola, MS                | 0.454                | 84.78                     | 89.33                 |
| 28109              | Pearl River, MS           | 0.359                | 80.1                      | 70.51                 |
| 28111              | Perry, MS                 | 0.551                | 88.86                     | 70.86                 |
| 28113              | Pike, MS                  | 0.554                | 88.98                     | 98.82                 |
| 28115              | Pontotoc, MS              | 0.236                | 72.88                     | 89.62                 |
| 28117              | Prentiss, MS              | 0.403                | 82.36                     | 85.13                 |
| 28119              | Quitman, MS               | 1.702                | 99.97                     | 95.45                 |
| 28121              | Rankin, MS                | -0.258               | 30.63                     | 31.27                 |
| 28123              | Scott, MS                 | 0.54                 | 88.51                     | 98.5                  |
| 28125              | Sharkey, MS               | 1.118                | 98.34                     | 97.29                 |
| 28127              | Simpson, MS               | 0.487                | 86.18                     | 90.73                 |
| 28129              | Smith, MS                 | 0.109                | 63.8                      | 47.32                 |
| 28131              | Stone, MS                 | 0.097                | 63.13                     | 60.45                 |
| 28133              | Sunflower, MS             | 1.012                | 97.52                     | 94.94                 |
| 28135              | Tallahatchie, MS          | 1.337                | 99.46                     | 97.36                 |
| 28137              | Tate, MS                  | 0.234                | 72.68                     | 86.5                  |
| 28139              | Tippah, MS                | 0.409                | 82.71                     | 86.46                 |
| 28141              | Tishomingo, MS            | 0.522                | 87.74                     | 66.59                 |
| 28143              | Tunica, MS                | 0.322                | 77.97                     | 97.2                  |
| 28145              | Union, MS                 | 0.206                | 70.77                     | 82.77                 |
| 28147              | Walthall, MS              | 0.509                | 87.17                     | 86.11                 |

| <b>County FIPS</b> | <b>County Description</b> | <b>DOS-SVI Index</b> | <b>DOS-SVI Percentile</b> | <b>SVI Percentile</b> |
|--------------------|---------------------------|----------------------|---------------------------|-----------------------|
| 28149              | Warren, MS                | 0.231                | 72.53                     | 86.05                 |
| 28151              | Washington, MS            | 0.901                | 96.4                      | 97.83                 |
| 28153              | Wayne, MS                 | 0.688                | 93.16                     | 89.97                 |
| 28155              | Webster, MS               | 0.345                | 79.27                     | 59.62                 |
| 28157              | Wilkinson, MS             | 1.43                 | 99.62                     | 91.69                 |
| 28159              | Winston, MS               | 0.464                | 85.23                     | 93.06                 |
| 28161              | Yalobusha, MS             | 0.134                | 65.52                     | 73.47                 |
| 28163              | Yazoo, MS                 | 1.159                | 98.79                     | 99.52                 |
| 29001              | Adair, MO                 | 0.214                | 71.28                     | 45.48                 |
| 29003              | Andrew, MO                | -0.441               | 14.01                     | 3.25                  |
| 29005              | Atchison, MO              | -0.24                | 32.57                     | 7.36                  |
| 29007              | Audrain, MO               | 0.023                | 56.7                      | 61.5                  |
| 29009              | Barry, MO                 | 0.048                | 59.15                     | 70.99                 |
| 29011              | Barton, MO                | -0.071               | 48.27                     | 59.94                 |
| 29013              | Bates, MO                 | -0.261               | 30.37                     | 38.57                 |
| 29015              | Benton, MO                | 0.612                | 90.73                     | 55.13                 |
| 29017              | Bollinger, MO             | 0.183                | 69.21                     | 47.93                 |
| 29019              | Boone, MO                 | -0.227               | 33.88                     | 29.27                 |
| 29021              | Buchanan, MO              | -0.177               | 38.68                     | 71.82                 |
| 29023              | Butler, MO                | 0.507                | 87.01                     | 81.72                 |
| 29025              | Caldwell, MO              | -0.404               | 17.07                     | 45.13                 |
| 29027              | Callaway, MO              | -0.121               | 43.71                     | 32.32                 |
| 29029              | Camden, MO                | 0.248                | 73.51                     | 33.63                 |
| 29031              | Cape Girardeau, MO        | -0.155               | 40.81                     | 41.18                 |
| 29033              | Carroll, MO               | 0.066                | 60.49                     | 53.25                 |
| 29035              | Carter, MO                | 0.223                | 71.98                     | 74.55                 |
| 29037              | Cass, MO                  | -0.447               | 13.53                     | 11.88                 |
| 29039              | Cedar, MO                 | 0.354                | 79.78                     | 64.11                 |
| 29041              | Chariton, MO              | -0.201               | 36.48                     | 18.98                 |
| 29043              | Christian, MO             | -0.459               | 13.02                     | 14.97                 |
| 29045              | Clark, MO                 | -0.277               | 28.97                     | 34.2                  |
| 29047              | Clay, MO                  | -0.507               | 9.84                      | 13.63                 |
| 29049              | Clinton, MO               | -0.322               | 24.64                     | 16.43                 |
| 29051              | Cole, MO                  | -0.394               | 18.08                     | 25.83                 |
| 29053              | Cooper, MO                | -0.126               | 43.11                     | 38.92                 |
| 29055              | Crawford, MO              | 0.538                | 88.38                     | 75.54                 |
| 29057              | Dade, MO                  | 0.377                | 81.18                     | 66.37                 |
| 29059              | Dallas, MO                | 0.058                | 59.95                     | 70.19                 |
| 29061              | Daviess, MO               | -0.455               | 13.28                     | 47.07                 |
| 29063              | DeKalb, MO                | 0.087                | 62.3                      | 40.54                 |
| 29065              | Dent, MO                  | 0.316                | 77.71                     | 63.12                 |
| 29067              | Douglas, MO               | 0.292                | 76.47                     | 52.32                 |
| 29069              | Dunklin, MO               | 0.358                | 80.04                     | 95.8                  |
| 29071              | Franklin, MO              | -0.321               | 24.77                     | 14.59                 |
| 29073              | Gasconade, MO             | -0.254               | 31.07                     | 8.54                  |
| 29075              | Gentry, MO                | -0.245               | 31.9                      | 43.89                 |
| 29077              | Greene, MO                | -0.192               | 37.31                     | 43.95                 |
| 29079              | Grundy, MO                | -0.278               | 28.91                     | 61.85                 |
| 29081              | Harrison, MO              | -0.11                | 44.6                      | 74.17                 |
| 29083              | Henry, MO                 | 0.131                | 65.27                     | 59.59                 |
| 29085              | Hickory, MO               | 0.707                | 93.66                     | 46.72                 |
| 29087              | Holt, MO                  | -0.166               | 39.76                     | 19.59                 |
| 29089              | Howard, MO                | -0.031               | 51.67                     | 40.41                 |
| 29091              | Howell, MO                | 0.102                | 63.52                     | 67.17                 |
| 29093              | Iron, MO                  | 0.382                | 81.47                     | 78.22                 |

| <b>County FIPS</b> | <b>County Description</b> | <b>DOS-SVI Index</b> | <b>DOS-SVI Percentile</b> | <b>SVI Percentile</b> |
|--------------------|---------------------------|----------------------|---------------------------|-----------------------|
| 29095              | Jackson, MO               | -0.269               | 29.67                     | 53.54                 |
| 29097              | Jasper, MO                | -0.218               | 34.61                     | 65.64                 |
| 29099              | Jefferson, MO             | -0.243               | 32.09                     | 18.63                 |
| 29101              | Johnson, MO               | -0.197               | 36.87                     | 35.06                 |
| 29103              | Knox, MO                  | 0.184                | 69.34                     | 55.7                  |
| 29105              | Laclede, MO               | 0.079                | 61.48                     | 61.78                 |
| 29107              | Lafayette, MO             | -0.31                | 26.01                     | 38.82                 |
| 29109              | Lawrence, MO              | -0.036               | 51.26                     | 78.66                 |
| 29111              | Lewis, MO                 | -0.255               | 30.88                     | 44.65                 |
| 29113              | Lincoln, MO               | -0.247               | 31.61                     | 29.39                 |
| 29115              | Linn, MO                  | -0.344               | 22.8                      | 27.2                  |
| 29117              | Livingston, MO            | -0.232               | 33.33                     | 37.48                 |
| 29119              | McDonald, MO              | -0.015               | 53.14                     | 86.31                 |
| 29121              | Macon, MO                 | -0.074               | 47.95                     | 58.6                  |
| 29123              | Madison, MO               | -0.022               | 52.53                     | 47.77                 |
| 29125              | Maries, MO                | 0.133                | 65.42                     | 51.18                 |
| 29127              | Marion, MO                | -0.177               | 38.71                     | 54.59                 |
| 29129              | Mercer, MO                | -0.428               | 15.15                     | 30.45                 |
| 29131              | Miller, MO                | 0.035                | 57.94                     | 50.1                  |
| 29133              | Mississippi, MO           | 0.354                | 79.75                     | 90.76                 |
| 29135              | Moniteau, MO              | -0.264               | 30.12                     | 51.43                 |
| 29137              | Monroe, MO                | -0.079               | 47.56                     | 38.76                 |
| 29139              | Montgomery, MO            | -0.065               | 48.81                     | 53.31                 |
| 29141              | Morgan, MO                | 0.096                | 63.1                      | 62.9                  |
| 29143              | New Madrid, MO            | 0.426                | 83.35                     | 89.68                 |
| 29145              | Newton, MO                | -0.212               | 35.24                     | 43.41                 |
| 29147              | Nodaway, MO               | 0.05                 | 59.38                     | 22.2                  |
| 29149              | Oregon, MO                | 0.243                | 73.19                     | 48.85                 |
| 29151              | Osage, MO                 | -0.536               | 8.28                      | 4.97                  |
| 29153              | Ozark, MO                 | 0.512                | 87.36                     | 58.25                 |
| 29155              | Pemiscot, MO              | 0.478                | 85.93                     | 93.03                 |
| 29157              | Perry, MO                 | -0.373               | 20.22                     | 23.12                 |
| 29159              | Pettis, MO                | -0.11                | 44.67                     | 80.35                 |
| 29161              | Phelps, MO                | 0.116                | 64.69                     | 65.96                 |
| 29163              | Pike, MO                  | -0.075               | 47.82                     | 53.76                 |
| 29165              | Platte, MO                | -0.594               | 5.16                      | 9.59                  |
| 29167              | Polk, MO                  | -0.132               | 42.73                     | 59.87                 |
| 29169              | Pulaski, MO               | 0.341                | 79.05                     | 65.03                 |
| 29171              | Putnam, MO                | -0.054               | 49.67                     | 57.64                 |
| 29173              | Ralls, MO                 | -0.145               | 41.42                     | 10.45                 |
| 29175              | Randolph, MO              | 0.11                 | 63.99                     | 55.54                 |
| 29177              | Ray, MO                   | -0.235               | 32.92                     | 25.73                 |
| 29179              | Reynolds, MO              | 0.487                | 86.22                     | 55.73                 |
| 29181              | Ripley, MO                | 0.687                | 93.12                     | 71.5                  |
| 29183              | St. Charles, MO           | -0.616               | 4.39                      | 3.63                  |
| 29185              | St. Clair, MO             | 0.258                | 74.28                     | 49.87                 |
| 29186              | Ste. Genevieve, MO        | -0.123               | 43.43                     | 18.85                 |
| 29187              | St. Francois, MO          | 0.184                | 69.31                     | 70.16                 |
| 29189              | St. Louis, MO             | -0.368               | 20.79                     | 26.11                 |
| 29195              | Saline, MO                | -0.138               | 42.09                     | 81.62                 |
| 29197              | Schuyler, MO              | -0.193               | 37.22                     | 38.31                 |
| 29199              | Scotland, MO              | -0.29                | 27.98                     | 53.03                 |
| 29201              | Scott, MO                 | 0.026                | 56.8                      | 78.44                 |
| 29203              | Shannon, MO               | 0.591                | 90.16                     | 64.49                 |
| 29205              | Shelby, MO                | -0.264               | 30.21                     | 39.84                 |

| <b>County FIPS</b> | <b>County Description</b> | <b>DOS-SVI Index</b> | <b>DOS-SVI Percentile</b> | <b>SVI Percentile</b> |
|--------------------|---------------------------|----------------------|---------------------------|-----------------------|
| 29207              | Stoddard, MO              | 0.168                | 68.1                      | 46.43                 |
| 29209              | Stone, MO                 | 0.271                | 75.17                     | 34.87                 |
| 29211              | Sullivan, MO              | -0.173               | 39.13                     | 62.96                 |
| 29213              | Taney, MO                 | 0.136                | 65.81                     | 82.17                 |
| 29215              | Texas, MO                 | 0.624                | 91.09                     | 83.03                 |
| 29217              | Vernon, MO                | -0.25                | 31.33                     | 45.1                  |
| 29219              | Warren, MO                | -0.209               | 35.53                     | 38.41                 |
| 29221              | Washington, MO            | 0.722                | 94.02                     | 79.04                 |
| 29223              | Wayne, MO                 | 0.828                | 95.8                      | 76.46                 |
| 29225              | Webster, MO               | -0.331               | 23.91                     | 63.85                 |
| 29227              | Worth, MO                 | -0.061               | 49.12                     | 22.39                 |
| 29229              | Wright, MO                | 0.227                | 72.3                      | 90.06                 |
| 29510              | St. Louis City, MO        | 0.135                | 65.58                     | 77.96                 |
| 30001              | Beaverhead, MT            | -0.071               | 48.2                      | 25.16                 |
| 30003              | Big Horn, MT              | -0.051               | 49.86                     | 82.74                 |
| 30005              | Blaine, MT                | 0.656                | 92.23                     | 91.5                  |
| 30007              | Broadwater, MT            | 0.029                | 57.18                     | 4.2                   |
| 30009              | Carbon, MT                | -0.158               | 40.43                     | 4.33                  |
| 30011              | Carter, MT                | -0.206               | 35.85                     | 4.87                  |
| 30013              | Cascade, MT               | -0.276               | 29.13                     | 41.02                 |
| 30015              | Chouteau, MT              | -0.312               | 25.82                     | 47.99                 |
| 30017              | Custer, MT                | -0.323               | 24.51                     | 29.01                 |
| 30019              | Daniels, MT               | -0.484               | 11.21                     | 2.42                  |
| 30021              | Dawson, MT                | -0.43                | 14.99                     | 7.52                  |
| 30023              | Deer Lodge, MT            | 0.175                | 68.58                     | 47.17                 |
| 30025              | Fallon, MT                | -0.402               | 17.16                     | 2.17                  |
| 30027              | Fergus, MT                | -0.387               | 18.69                     | 23.76                 |
| 30029              | Flathead, MT              | -0.388               | 18.59                     | 9.24                  |
| 30031              | Gallatin, MT              | -0.481               | 11.33                     | 4.27                  |
| 30033              | Garfield, MT              | -0.684               | 2.26                      | 0.76                  |
| 30035              | Glacier, MT               | 0.16                 | 67.43                     | 85.83                 |
| 30037              | Golden Valley, MT         | 0.035                | 58.01                     | 5.19                  |
| 30039              | Granite, MT               | 0.072                | 60.9                      | 7.64                  |
| 30041              | Hill, MT                  | 0.004                | 55.11                     | 69.84                 |
| 30043              | Jefferson, MT             | -0.288               | 28.21                     | 4.81                  |
| 30045              | Judith Basin, MT          | -0.146               | 41.29                     | 1.62                  |
| 30047              | Lake, MT                  | 0.034                | 57.72                     | 64.68                 |
| 30049              | Lewis and Clark, MT       | -0.386               | 18.91                     | 12.58                 |
| 30051              | Liberty, MT               | -0.416               | 16.08                     | 40.99                 |
| 30053              | Lincoln, MT               | 0.638                | 91.59                     | 41.94                 |
| 30055              | McCone, MT                | -0.504               | 10.06                     | 7.74                  |
| 30057              | Madison, MT               | -0.143               | 41.61                     | 17.26                 |
| 30059              | Meagher, MT               | -0.203               | 36.29                     | 4.65                  |
| 30061              | Mineral, MT               | 0.435                | 83.67                     | 56.21                 |
| 30063              | Missoula, MT              | -0.22                | 34.32                     | 17.8                  |
| 30065              | Musselshell, MT           | -0.068               | 48.49                     | 35.51                 |
| 30067              | Park, MT                  | -0.38                | 19.55                     | 6.88                  |
| 30069              | Petroleum, MT             | -0.306               | 26.43                     | 0.29                  |
| 30071              | Phillips, MT              | 0.093                | 62.85                     | 41.46                 |
| 30073              | Pondera, MT               | 0.057                | 59.76                     | 82.96                 |
| 30075              | Powder River, MT          | 0.007                | 55.46                     | 3.92                  |
| 30077              | Powell, MT                | -0.164               | 39.89                     | 25.45                 |
| 30079              | Prairie, MT               | -0.116               | 44.16                     | 7.58                  |
| 30081              | Ravalli, MT               | 0.082                | 61.8                      | 18.6                  |
| 30083              | Richland, MT              | -0.582               | 5.89                      | 21.21                 |

| County FIPS | County Description | DOS-SVI Index | DOS-SVI Percentile | SVI Percentile |
|-------------|--------------------|---------------|--------------------|----------------|
| 30085       | Roosevelt, MT      | 0.164         | 67.84              | 88.79          |
| 30087       | Rosebud, MT        | 0.135         | 65.71              | 60.7           |
| 30089       | Sanders, MT        | 0.514         | 87.46              | 34.78          |
| 30091       | Sheridan, MT       | -0.464        | 12.58              | 9.49           |
| 30093       | Silver Bow, MT     | -0.044        | 50.33              | 52.58          |
| 30095       | Stillwater, MT     | -0.37         | 20.6               | 3.6            |
| 30097       | Sweet Grass, MT    | -0.512        | 9.49               | 0.86           |
| 30099       | Teton, MT          | -0.491        | 10.79              | 29.81          |
| 30101       | Toole, MT          | -0.277        | 28.94              | 47.68          |
| 30103       | Treasure, MT       | -0.192        | 37.38              | 5.67           |
| 30105       | Valley, MT         | -0.191        | 37.44              | 11.62          |
| 30107       | Wheatland, MT      | -0.294        | 27.57              | 54.36          |
| 30109       | Wibaux, MT         | -0.405        | 16.97              | 39.33          |
| 30111       | Yellowstone, MT    | -0.482        | 11.27              | 24.97          |
| 31001       | Adams, NE          | -0.387        | 18.72              | 35.92          |
| 31003       | Antelope, NE       | -0.457        | 13.15              | 10.32          |
| 31005       | Arthur, NE         | -0.591        | 5.29               | 0.83           |
| 31007       | Banner, NE         | -0.532        | 8.53               | 0.41           |
| 31009       | Blaine, NE         | -0.677        | 2.48               | 9.08           |
| 31011       | Boone, NE          | -0.688        | 2.23               | 2.83           |
| 31013       | Box Butte, NE      | -0.376        | 19.8               | 35.86          |
| 31015       | Boyd, NE           | -0.323        | 24.55              | 9.2            |
| 31017       | Brown, NE          | -0.428        | 15.22              | 12.52          |
| 31019       | Buffalo, NE        | -0.431        | 14.96              | 26.56          |
| 31021       | Burt, NE           | -0.389        | 18.5               | 25.41          |
| 31023       | Butler, NE         | -0.522        | 8.95               | 11.72          |
| 31025       | Cass, NE           | -0.682        | 2.29               | 1.08           |
| 31027       | Cedar, NE          | -0.668        | 2.67               | 1.21           |
| 31029       | Chase, NE          | -0.353        | 21.97              | 15.51          |
| 31031       | Cherry, NE         | -0.396        | 17.96              | 22.61          |
| 31033       | Cheyenne, NE       | -0.554        | 7.23               | 12.1           |
| 31035       | Clay, NE           | -0.341        | 23.08              | 16.46          |
| 31037       | Colfax, NE         | -0.429        | 15.09              | 51.88          |
| 31039       | Cuming, NE         | -0.553        | 7.39               | 19.36          |
| 31041       | Custer, NE         | -0.576        | 6.08               | 18.18          |
| 31043       | Dakota, NE         | -0.264        | 30.15              | 86.15          |
| 31045       | Dawes, NE          | -0.323        | 24.42              | 17.17          |
| 31047       | Dawson, NE         | -0.359        | 21.33              | 79.33          |
| 31049       | Deuel, NE          | -0.069        | 48.42              | 16.5           |
| 31051       | Dixon, NE          | -0.39         | 18.43              | 37.9           |
| 31053       | Dodge, NE          | -0.316        | 25.44              | 56.91          |
| 31055       | Douglas, NE        | -0.481        | 11.4               | 46.69          |
| 31057       | Dundy, NE          | -0.474        | 12.03              | 30.38          |
| 31059       | Fillmore, NE       | -0.373        | 20.12              | 6.18           |
| 31061       | Franklin, NE       | -0.258        | 30.56              | 7.68           |
| 31063       | Frontier, NE       | -0.102        | 45.46              | 9.94           |
| 31065       | Furnas, NE         | -0.371        | 20.54              | 18.25          |
| 31067       | Gage, NE           | -0.34         | 23.14              | 11.05          |
| 31069       | Garden, NE         | -0.397        | 17.73              | 1.43           |
| 31071       | Garfield, NE       | -0.443        | 13.85              | 4.3            |
| 31073       | Gosper, NE         | -0.408        | 16.78              | 0.51           |
| 31075       | Grant, NE          | -0.001        | 54.7               | 13.28          |
| 31077       | Greeley, NE        | -0.547        | 7.83               | 4.11           |
| 31079       | Hall, NE           | -0.395        | 18.05              | 67.01          |
| 31081       | Hamilton, NE       | -0.628        | 3.82               | 0.89           |

| <b>County FIPS</b> | <b>County Description</b> | <b>DOS-SVI Index</b> | <b>DOS-SVI Percentile</b> | <b>SVI Percentile</b> |
|--------------------|---------------------------|----------------------|---------------------------|-----------------------|
| 31083              | Harlan, NE                | -0.169               | 39.41                     | 12.39                 |
| 31085              | Hayes, NE                 | -0.324               | 24.39                     | 4.36                  |
| 31087              | Hitchcock, NE             | -0.09                | 46.64                     | 19.43                 |
| 31089              | Holt, NE                  | -0.577               | 6.02                      | 9.81                  |
| 31091              | Hooker, NE                | 0.147                | 66.48                     | 14.68                 |
| 31093              | Howard, NE                | -0.411               | 16.52                     | 8.03                  |
| 31095              | Jefferson, NE             | -0.371               | 20.5                      | 21.85                 |
| 31097              | Johnson, NE               | -0.212               | 35.31                     | 57.77                 |
| 31099              | Kearney, NE               | -0.621               | 4.14                      | 9.39                  |
| 31101              | Keith, NE                 | -0.134               | 42.53                     | 22.68                 |
| 31103              | Keya Paha, NE             | -0.631               | 3.66                      | 0.1                   |
| 31105              | Kimball, NE               | 0.005                | 55.33                     | 56.11                 |
| 31107              | Knox, NE                  | -0.49                | 10.86                     | 32.77                 |
| 31109              | Lancaster, NE             | -0.461               | 12.83                     | 30.25                 |
| 31111              | Lincoln, NE               | -0.465               | 12.48                     | 36.75                 |
| 31113              | Logan, NE                 | -0.805               | 1.18                      | 10.73                 |
| 31115              | Loup, NE                  | -0.117               | 44.13                     | 0.45                  |
| 31117              | McPherson, NE             | -0.624               | 3.95                      | 8.38                  |
| 31119              | Madison, NE               | -0.481               | 11.37                     | 51.05                 |
| 31121              | Merrick, NE               | -0.437               | 14.42                     | 19.75                 |
| 31123              | Morrill, NE               | -0.155               | 40.78                     | 42.2                  |
| 31125              | Nance, NE                 | -0.322               | 24.58                     | 8.25                  |
| 31127              | Nemaha, NE                | -0.213               | 35.21                     | 16.59                 |
| 31129              | Nuckolls, NE              | -0.399               | 17.57                     | 17.36                 |
| 31131              | Otoe, NE                  | -0.472               | 12.13                     | 22.87                 |
| 31133              | Pawnee, NE                | -0.353               | 22                        | 23.18                 |
| 31135              | Perkins, NE               | -0.669               | 2.64                      | 5.38                  |
| 31137              | Phelps, NE                | -0.639               | 3.5                       | 12.26                 |
| 31139              | Pierce, NE                | -0.612               | 4.62                      | 2.29                  |
| 31141              | Platte, NE                | -0.555               | 7.13                      | 29.94                 |
| 31143              | Polk, NE                  | -0.382               | 19.29                     | 19.08                 |
| 31145              | Red Willow, NE            | -0.34                | 23.24                     | 23.73                 |
| 31147              | Richardson, NE            | -0.276               | 29.07                     | 10.25                 |
| 31149              | Rock, NE                  | -0.411               | 16.55                     | 0.92                  |
| 31151              | Saline, NE                | -0.337               | 23.4                      | 59.78                 |
| 31153              | Sarpy, NE                 | -0.794               | 1.21                      | 9.71                  |
| 31155              | Saunders, NE              | -0.601               | 4.97                      | 4.24                  |
| 31157              | Scotts Bluff, NE          | -0.191               | 37.5                      | 56.75                 |
| 31159              | Seward, NE                | -0.599               | 5.03                      | 4.68                  |
| 31161              | Sheridan, NE              | -0.275               | 29.29                     | 59.68                 |
| 31163              | Sherman, NE               | -0.244               | 31.96                     | 7.39                  |
| 31165              | Sioux, NE                 | -0.556               | 7                         | 1.78                  |
| 31167              | Stanton, NE               | -0.573               | 6.21                      | 5.7                   |
| 31169              | Thayer, NE                | -0.548               | 7.67                      | 5.8                   |
| 31171              | Thomas, NE                | -0.354               | 21.9                      | 0.35                  |
| 31173              | Thurston, NE              | -0.026               | 51.96                     | 88.66                 |
| 31175              | Valley, NE                | -0.487               | 11.05                     | 14.84                 |
| 31177              | Washington, NE            | -0.582               | 5.83                      | 3.79                  |
| 31179              | Wayne, NE                 | -0.404               | 17.1                      | 8.47                  |
| 31181              | Webster, NE               | -0.435               | 14.68                     | 10.92                 |
| 31183              | Wheeler, NE               | -0.257               | 30.75                     | 0.48                  |
| 31185              | York, NE                  | -0.422               | 15.6                      | 18.28                 |
| 32001              | Churchill, NV             | 0.013                | 55.94                     | 60.48                 |
| 32003              | Clark, NV                 | -0.108               | 44.8                      | 74.04                 |
| 32005              | Douglas, NV               | -0.146               | 41.32                     | 17.93                 |



| <b>County FIPS</b> | <b>County Description</b> | <b>DOS-SVI Index</b> | <b>DOS-SVI Percentile</b> | <b>SVI Percentile</b> |
|--------------------|---------------------------|----------------------|---------------------------|-----------------------|
| 32007              | Elko, NV                  | -0.304               | 26.58                     | 51.78                 |
| 32009              | Esmeralda, NV             | 0.033                | 57.5                      | 63.95                 |
| 32011              | Eureka, NV                | -0.319               | 24.93                     | 6.75                  |
| 32013              | Humboldt, NV              | -0.064               | 48.9                      | 58.69                 |
| 32015              | Lander, NV                | 0.056                | 59.73                     | 82.61                 |
| 32017              | Lincoln, NV               | 0.675                | 92.71                     | 42.13                 |
| 32019              | Lyon, NV                  | 0.221                | 71.82                     | 57.83                 |
| 32021              | Mineral, NV               | 0.827                | 95.7                      | 88.15                 |
| 32023              | Nye, NV                   | 0.815                | 95.58                     | 73.09                 |
| 32027              | Pershing, NV              | 0.554                | 88.95                     | 90.38                 |
| 32029              | Storey, NV                | 0.262                | 74.53                     | 7.17                  |
| 32031              | Washoe, NV                | -0.283               | 28.56                     | 52.71                 |
| 32033              | White Pine, NV            | -0.023               | 52.47                     | 37.42                 |
| 32510              | Carson City, NV           | 0.135                | 65.65                     | 84.43                 |
| 33001              | Belknap, NH               | -0.228               | 33.68                     | 8.41                  |
| 33003              | Carroll, NH               | -0.273               | 29.39                     | 5.83                  |
| 33005              | Cheshire, NH              | -0.275               | 29.32                     | 14.17                 |
| 33007              | Coos, NH                  | 0.171                | 68.42                     | 52.9                  |
| 33009              | Grafton, NH               | -0.252               | 31.17                     | 18.82                 |
| 33011              | Hillsborough, NH          | -0.458               | 13.09                     | 19.11                 |
| 33013              | Merrimack, NH             | -0.374               | 20.09                     | 14.55                 |
| 33015              | Rockingham, NH            | -0.541               | 8.09                      | 1.11                  |
| 33017              | Strafford, NH             | -0.289               | 28.08                     | 17.48                 |
| 33019              | Sullivan, NH              | -0.281               | 28.75                     | 15.13                 |
| 34001              | Atlantic, NJ              | 0.022                | 56.57                     | 79.11                 |
| 34003              | Bergen, NJ                | -0.552               | 7.45                      | 23.95                 |
| 34005              | Burlington, NJ            | -0.315               | 25.53                     | 20.54                 |
| 34007              | Camden, NJ                | -0.197               | 36.96                     | 61.18                 |
| 34009              | Cape May, NJ              | -0.066               | 48.71                     | 33.98                 |
| 34011              | Cumberland, NJ            | 0.08                 | 61.57                     | 95.92                 |
| 34013              | Essex, NJ                 | -0.217               | 34.64                     | 84.04                 |
| 34015              | Gloucester, NJ            | -0.328               | 24.07                     | 16.75                 |
| 34017              | Hudson, NJ                | -0.607               | 4.81                      | 64.24                 |
| 34019              | Hunterdon, NJ             | -0.614               | 4.46                      | 2.64                  |
| 34021              | Mercer, NJ                | -0.251               | 31.23                     | 55.8                  |
| 34023              | Middlesex, NJ             | -0.388               | 18.62                     | 46.59                 |
| 34025              | Monmouth, NJ              | -0.503               | 10.09                     | 16.05                 |
| 34027              | Morris, NJ                | -0.597               | 5.09                      | 12.01                 |
| 34029              | Ocean, NJ                 | -0.394               | 18.11                     | 33.54                 |
| 34031              | Passaic, NJ               | -0.552               | 7.42                      | 77.64                 |
| 34033              | Salem, NJ                 | -0.057               | 49.38                     | 59.01                 |
| 34035              | Somerset, NJ              | -0.594               | 5.19                      | 10                    |
| 34037              | Sussex, NJ                | -0.422               | 15.7                      | 1.91                  |
| 34039              | Union, NJ                 | -0.439               | 14.26                     | 62.32                 |
| 34041              | Warren, NJ                | -0.294               | 27.54                     | 21.78                 |
| 35001              | Bernalillo, NM            | 0.035                | 57.85                     | 68.28                 |
| 35003              | Catron, NM                | 0.698                | 93.44                     | 33.57                 |
| 35005              | Chaves, NM                | 0.191                | 69.91                     | 95.51                 |
| 35006              | Cibola, NM                | 1.083                | 98.15                     | 99.84                 |
| 35007              | Colfax, NM                | 0.754                | 94.65                     | 96.27                 |
| 35009              | Curry, NM                 | 0.109                | 63.9                      | 87.74                 |
| 35011              | De Baca, NM               | 0.085                | 62.11                     | 69.39                 |
| 35013              | Dona Ana, NM              | 0.511                | 87.3                      | 98.41                 |
| 35015              | Eddy, NM                  | -0.19                | 37.6                      | 70.32                 |
| 35017              | Grant, NM                 | 0.583                | 89.97                     | 92.96                 |

| <b>County FIPS</b> | <b>County Description</b> | <b>DOS-SVI Index</b> | <b>DOS-SVI Percentile</b> | <b>SVI Percentile</b> |
|--------------------|---------------------------|----------------------|---------------------------|-----------------------|
| 35019              | Guadalupe, NM             | 0.896                | 96.37                     | 95.29                 |
| 35021              | Harding, NM               | 0.54                 | 88.47                     | 36.15                 |
| 35023              | Hidalgo, NM               | 1.015                | 97.61                     | 96.31                 |
| 35025              | Lea, NM                   | -0.009               | 53.87                     | 92.17                 |
| 35027              | Lincoln, NM               | 0.218                | 71.63                     | 47.96                 |
| 35028              | Los Alamos, NM            | -0.643               | 3.41                      | 2.48                  |
| 35029              | Luna, NM                  | 1.182                | 98.92                     | 99.9                  |
| 35031              | McKinley, NM              | 0.73                 | 94.3                      | 98.89                 |
| 35033              | Mora, NM                  | 0.925                | 96.66                     | 79.59                 |
| 35035              | Otero, NM                 | 0.531                | 88.03                     | 91.4                  |
| 35037              | Quay, NM                  | 0.647                | 91.85                     | 80.96                 |
| 35041              | Roosevelt, NM             | 0.534                | 88.19                     | 94.3                  |
| 35043              | Sandoval, NM              | 0.063                | 60.3                      | 48.18                 |
| 35045              | San Juan, NM              | 0.332                | 78.38                     | 91.94                 |
| 35047              | San Miguel, NM            | 1.066                | 97.99                     | 98.63                 |
| 35049              | Santa Fe, NM              | 0.004                | 55.08                     | 52.55                 |
| 35051              | Sierra, NM                | 1.259                | 99.27                     | 91.46                 |
| 35053              | Socorro, NM               | 0.827                | 95.73                     | 97.45                 |
| 35055              | Taos, NM                  | 0.626                | 91.21                     | 85.86                 |
| 35057              | Torrance, NM              | 0.612                | 90.67                     | 74.9                  |
| 35059              | Union, NM                 | 0.158                | 67.3                      | 67.93                 |
| 35061              | Valencia, NM              | 0.647                | 91.88                     | 90.41                 |
| 36001              | Albany, NY                | -0.373               | 20.15                     | 30.41                 |
| 36003              | Allegany, NY              | 0.074                | 61.16                     | 58.18                 |
| 36005              | Bronx, NY                 | -0.394               | 18.18                     | 99.27                 |
| 36007              | Broome, NY                | -0.057               | 49.44                     | 61.66                 |
| 36009              | Cattaraugus, NY           | -0.08                | 47.5                      | 72.83                 |
| 36011              | Cayuga, NY                | -0.157               | 40.56                     | 50.25                 |
| 36013              | Chautauqua, NY            | -0.004               | 54.35                     | 72.48                 |
| 36015              | Chemung, NY               | -0.229               | 33.62                     | 48.5                  |
| 36017              | Chenango, NY              | 0.038                | 58.42                     | 56.46                 |
| 36019              | Clinton, NY               | 0.008                | 55.62                     | 53.12                 |
| 36021              | Columbia, NY              | -0.139               | 42.02                     | 38.54                 |
| 36023              | Cortland, NY              | -0.203               | 36.2                      | 34.52                 |
| 36025              | Delaware, NY              | 0.005                | 55.24                     | 63.31                 |
| 36027              | Dutchess, NY              | -0.299               | 27.09                     | 42.07                 |
| 36029              | Erie, NY                  | -0.346               | 22.64                     | 41.4                  |
| 36031              | Essex, NY                 | -0.083               | 46.99                     | 38.69                 |
| 36033              | Franklin, NY              | 0.128                | 65.11                     | 70.73                 |
| 36035              | Fulton, NY                | -0.034               | 51.42                     | 50.1                  |
| 36037              | Genesee, NY               | -0.256               | 30.82                     | 18.79                 |
| 36039              | Greene, NY                | -0.108               | 44.83                     | 41.59                 |
| 36041              | Hamilton, NY              | 0.465                | 85.45                     | 38.98                 |
| 36043              | Herkimer, NY              | -0.058               | 49.35                     | 53.22                 |
| 36045              | Jefferson, NY             | -0.14                | 41.93                     | 64.84                 |
| 36047              | Kings, NY                 | -1.013               | 0.38                      | 81.53                 |
| 36049              | Lewis, NY                 | -0.06                | 49.25                     | 29.11                 |
| 36051              | Livingston, NY            | -0.152               | 40.91                     | 34.24                 |
| 36053              | Madison, NY               | -0.218               | 34.54                     | 16.66                 |
| 36055              | Monroe, NY                | -0.218               | 34.58                     | 52.04                 |
| 36057              | Montgomery, NY            | -0.009               | 53.84                     | 83.06                 |
| 36059              | Nassau, NY                | -0.612               | 4.52                      | 24.3                  |
| 36061              | New York, NY              | -1.177               | 0.22                      | 55.1                  |
| 36063              | Niagara, NY               | -0.243               | 32.06                     | 33.18                 |
| 36065              | Oneida, NY                | -0.175               | 38.97                     | 69.46                 |

| <b>County FIPS</b> | <b>County Description</b> | <b>DOS-SVI Index</b> | <b>DOS-SVI Percentile</b> | <b>SVI Percentile</b> |
|--------------------|---------------------------|----------------------|---------------------------|-----------------------|
| 36067              | Onondaga, NY              | -0.289               | 28.05                     | 52.07                 |
| 36069              | Ontario, NY               | -0.385               | 18.94                     | 23.15                 |
| 36071              | Orange, NY                | -0.52                | 9.07                      | 55.38                 |
| 36073              | Orleans, NY               | -0.041               | 50.78                     | 64.3                  |
| 36075              | Oswego, NY                | 0.072                | 60.97                     | 64.97                 |
| 36077              | Otsego, NY                | 0.045                | 58.9                      | 42.36                 |
| 36079              | Putnam, NY                | -0.475               | 11.94                     | 8.12                  |
| 36081              | Queens, NY                | -0.703               | 2.04                      | 62.01                 |
| 36083              | Rensselaer, NY            | -0.316               | 25.41                     | 34.3                  |
| 36085              | Richmond, NY              | -0.593               | 5.22                      | 47.64                 |
| 36087              | Rockland, NY              | -0.692               | 2.17                      | 60.38                 |
| 36089              | St. Lawrence, NY          | 0.091                | 62.62                     | 74.75                 |
| 36091              | Saratoga, NY              | -0.47                | 12.19                     | 4.75                  |
| 36093              | Schenectady, NY           | -0.25                | 31.3                      | 39.43                 |
| 36095              | Schoharie, NY             | 0.04                 | 58.68                     | 40.13                 |
| 36097              | Schuyler, NY              | 0.015                | 56                        | 36.91                 |
| 36099              | Seneca, NY                | -0.101               | 45.59                     | 44.9                  |
| 36101              | Steuben, NY               | -0.06                | 49.22                     | 46.91                 |
| 36103              | Suffolk, NY               | -0.509               | 9.65                      | 21.46                 |
| 36105              | Sullivan, NY              | 0.039                | 58.48                     | 79.39                 |
| 36107              | Tioga, NY                 | -0.108               | 44.86                     | 19.94                 |
| 36109              | Tompkins, NY              | -0.166               | 39.7                      | 34.62                 |
| 36111              | Ulster, NY                | -0.066               | 48.68                     | 47.04                 |
| 36113              | Warren, NY                | -0.318               | 25.18                     | 17.42                 |
| 36115              | Washington, NY            | -0.133               | 42.69                     | 40                    |
| 36117              | Wayne, NY                 | -0.175               | 39                        | 34.14                 |
| 36119              | Westchester, NY           | -0.555               | 7.07                      | 55.16                 |
| 36121              | Wyoming, NY               | -0.117               | 44                        | 31.21                 |
| 36123              | Yates, NY                 | -0.409               | 16.71                     | 43.92                 |
| 37001              | Alamance, NC              | 0.039                | 58.52                     | 78.38                 |
| 37003              | Alexander, NC             | 0.366                | 80.55                     | 63.41                 |
| 37005              | Alleghany, NC             | 0.629                | 91.37                     | 62.68                 |
| 37007              | Anson, NC                 | 0.684                | 93.06                     | 94.43                 |
| 37009              | Ashe, NC                  | 0.195                | 70.23                     | 49.94                 |
| 37011              | Avery, NC                 | 0.394                | 81.89                     | 64.46                 |
| 37013              | Beaufort, NC              | 0.554                | 88.92                     | 71.56                 |
| 37015              | Bertie, NC                | 1.172                | 98.85                     | 93.85                 |
| 37017              | Bladen, NC                | 0.691                | 93.22                     | 94.46                 |
| 37019              | Brunswick, NC             | 0.282                | 75.87                     | 35.83                 |
| 37021              | Buncombe, NC              | -0.19                | 37.57                     | 37.99                 |
| 37023              | Burke, NC                 | 0.562                | 89.33                     | 84.87                 |
| 37025              | Cabarrus, NC              | -0.397               | 17.8                      | 41.75                 |
| 37027              | Caldwell, NC              | 0.293                | 76.54                     | 65.1                  |
| 37029              | Camden, NC                | 0.204                | 70.74                     | 30.7                  |
| 37031              | Carteret, NC              | 0.231                | 72.56                     | 42.55                 |
| 37033              | Caswell, NC               | 0.498                | 86.53                     | 83.6                  |
| 37035              | Catawba, NC               | 0.022                | 56.54                     | 64.81                 |
| 37037              | Chatham, NC               | -0.042               | 50.72                     | 38.09                 |
| 37039              | Cherokee, NC              | 0.381                | 81.44                     | 48.69                 |
| 37041              | Chowan, NC                | 0.561                | 89.27                     | 81.18                 |
| 37043              | Clay, NC                  | 0.017                | 56.16                     | 21.91                 |
| 37045              | Cleveland, NC             | 0.396                | 82.11                     | 83.5                  |
| 37047              | Columbus, NC              | 0.587                | 90.07                     | 94.81                 |
| 37049              | Craven, NC                | 0.186                | 69.53                     | 80.99                 |
| 37051              | Cumberland, NC            | 0.287                | 76.15                     | 86.4                  |

| <b>County FIPS</b> | <b>County Description</b> | <b>DOS-SVI Index</b> | <b>DOS-SVI Percentile</b> | <b>SVI Percentile</b> |
|--------------------|---------------------------|----------------------|---------------------------|-----------------------|
| 37053              | Currituck, NC             | -0.189               | 37.7                      | 11.94                 |
| 37055              | Dare, NC                  | -0.287               | 28.34                     | 14.49                 |
| 37057              | Davidson, NC              | 0.133                | 65.46                     | 68.41                 |
| 37059              | Davie, NC                 | 0.016                | 56.06                     | 44.11                 |
| 37061              | Duplin, NC                | 0.71                 | 93.76                     | 97.9                  |
| 37063              | Durham, NC                | -0.178               | 38.65                     | 61.97                 |
| 37065              | Edgecombe, NC             | 0.467                | 85.51                     | 97.26                 |
| 37067              | Forsyth, NC               | -0.128               | 43.01                     | 68.34                 |
| 37069              | Franklin, NC              | 0.161                | 67.49                     | 63.76                 |
| 37071              | Gaston, NC                | 0.04                 | 58.71                     | 67.2                  |
| 37073              | Gates, NC                 | 0.468                | 85.64                     | 35.67                 |
| 37075              | Graham, NC                | 0.511                | 87.33                     | 63.38                 |
| 37077              | Granville, NC             | 0.271                | 75.14                     | 65.61                 |
| 37079              | Greene, NC                | 1.079                | 98.09                     | 99.24                 |
| 37081              | Guilford, NC              | -0.107               | 44.99                     | 63.69                 |
| 37083              | Halifax, NC               | 0.68                 | 92.93                     | 96.46                 |
| 37085              | Harnett, NC               | 0.142                | 66.12                     | 78.69                 |
| 37087              | Haywood, NC               | 0.067                | 60.52                     | 28.09                 |
| 37089              | Henderson, NC             | -0.204               | 36.13                     | 32.1                  |
| 37091              | Hertford, NC              | 1.008                | 97.45                     | 98.73                 |
| 37093              | Hoke, NC                  | 0.406                | 82.62                     | 89.24                 |
| 37095              | Hyde, NC                  | 0.617                | 90.89                     | 86.27                 |
| 37097              | Iredell, NC               | -0.149               | 41.1                      | 37.45                 |
| 37099              | Jackson, NC               | 0.177                | 68.8                      | 62.36                 |
| 37101              | Johnston, NC              | -0.078               | 47.72                     | 53.95                 |
| 37103              | Jones, NC                 | 0.926                | 96.69                     | 87.61                 |
| 37105              | Lee, NC                   | 0.185                | 69.47                     | 84.81                 |
| 37107              | Lenoir, NC                | 0.856                | 96.18                     | 99.33                 |
| 37109              | Lincoln, NC               | 0.109                | 63.83                     | 35.64                 |
| 37111              | McDowell, NC              | 0.362                | 80.2                      | 78.95                 |
| 37113              | Macon, NC                 | 0.027                | 56.86                     | 35.48                 |
| 37115              | Madison, NC               | 0.283                | 75.93                     | 45.86                 |
| 37117              | Martin, NC                | 0.727                | 94.14                     | 75.41                 |
| 37119              | Mecklenburg, NC           | -0.293               | 27.67                     | 44.08                 |
| 37121              | Mitchell, NC              | 0.185                | 69.41                     | 42.23                 |
| 37123              | Montgomery, NC            | 0.125                | 65.01                     | 87.13                 |
| 37125              | Moore, NC                 | -0.044               | 50.37                     | 36.21                 |
| 37127              | Nash, NC                  | 0.145                | 66.28                     | 82.87                 |
| 37129              | New Hanover, NC           | -0.035               | 51.29                     | 37.71                 |
| 37131              | Northampton, NC           | 0.708                | 93.7                      | 90.22                 |
| 37133              | Onslow, NC                | 0.3                  | 76.98                     | 74.65                 |
| 37135              | Orange, NC                | -0.278               | 28.88                     | 29.59                 |
| 37137              | Pamlico, NC               | 0.533                | 88.09                     | 71.62                 |
| 37139              | Pasquotank, NC            | 0.145                | 66.32                     | 77.48                 |
| 37141              | Pender, NC                | 0.246                | 73.35                     | 54.78                 |
| 37143              | Perquimans, NC            | 0.275                | 75.49                     | 50.48                 |
| 37145              | Person, NC                | 0.374                | 81.09                     | 77.32                 |
| 37147              | Pitt, NC                  | 0.335                | 78.54                     | 82.42                 |
| 37149              | Polk, NC                  | 0.029                | 57.08                     | 38.25                 |
| 37151              | Randolph, NC              | 0.1                  | 63.29                     | 69.65                 |
| 37153              | Richmond, NC              | 0.611                | 90.64                     | 97.96                 |
| 37155              | Robeson, NC               | 0.71                 | 93.73                     | 99.11                 |
| 37157              | Rockingham, NC            | 0.179                | 68.89                     | 78.57                 |
| 37159              | Rowan, NC                 | 0.201                | 70.39                     | 81.43                 |
| 37161              | Rutherford, NC            | 0.461                | 85                        | 75.51                 |

| <b>County FIPS</b> | <b>County Description</b> | <b>DOS-SVI Index</b> | <b>DOS-SVI Percentile</b> | <b>SVI Percentile</b> |
|--------------------|---------------------------|----------------------|---------------------------|-----------------------|
| 37163              | Sampson, NC               | 0.642                | 91.66                     | 97.23                 |
| 37165              | Scotland, NC              | 0.797                | 95.38                     | 99.36                 |
| 37167              | Stanly, NC                | -0.012               | 53.45                     | 63.25                 |
| 37169              | Stokes, NC                | 0.244                | 73.22                     | 30.67                 |
| 37171              | Surry, NC                 | 0.208                | 70.93                     | 72.58                 |
| 37173              | Swain, NC                 | 0.45                 | 84.66                     | 77.74                 |
| 37175              | Transylvania, NC          | 0.179                | 68.93                     | 39.75                 |
| 37177              | Tyrrell, NC               | 0.96                 | 97.07                     | 87.64                 |
| 37179              | Union, NC                 | -0.515               | 9.36                      | 18.73                 |
| 37181              | Vance, NC                 | 0.505                | 86.95                     | 97.87                 |
| 37183              | Wake, NC                  | -0.479               | 11.62                     | 27.74                 |
| 37185              | Warren, NC                | 0.845                | 96.08                     | 89.43                 |
| 37187              | Washington, NC            | 0.678                | 92.87                     | 87.87                 |
| 37189              | Watauga, NC               | 0.399                | 82.27                     | 41.21                 |
| 37191              | Wayne, NC                 | 0.368                | 80.71                     | 95.03                 |
| 37193              | Wilkes, NC                | 0.38                 | 81.34                     | 69.24                 |
| 37195              | Wilson, NC                | 0.261                | 74.5                      | 93.6                  |
| 37197              | Yadkin, NC                | 0.181                | 69.02                     | 64.04                 |
| 37199              | Yancey, NC                | 0.456                | 84.85                     | 57.36                 |
| 38001              | Adams, ND                 | -0.548               | 7.7                       | 2.99                  |
| 38003              | Barnes, ND                | -0.304               | 26.62                     | 12.45                 |
| 38005              | Benson, ND                | -0.211               | 35.34                     | 84.33                 |
| 38007              | Billings, ND              | -0.401               | 17.35                     | 3.12                  |
| 38009              | Bottineau, ND             | -0.246               | 31.87                     | 6.91                  |
| 38011              | Bowman, ND                | -0.612               | 4.65                      | 17.55                 |
| 38013              | Burke, ND                 | -0.989               | 0.45                      | 0.7                   |
| 38015              | Burleigh, ND              | -0.641               | 3.44                      | 17.39                 |
| 38017              | Cass, ND                  | -0.507               | 9.81                      | 14.27                 |
| 38019              | Cavalier, ND              | -0.618               | 4.27                      | 1.72                  |
| 38021              | Dickey, ND                | -0.593               | 5.25                      | 11.59                 |
| 38023              | Divide, ND                | -0.375               | 20.02                     | 3.34                  |
| 38025              | Dunn, ND                  | -0.322               | 24.74                     | 22.26                 |
| 38027              | Eddy, ND                  | -0.301               | 26.93                     | 29.04                 |
| 38029              | Emmons, ND                | -0.244               | 32.03                     | 9.55                  |
| 38031              | Foster, ND                | -0.651               | 3.12                      | 1.75                  |
| 38033              | Golden Valley, ND         | -0.558               | 6.94                      | 9.3                   |
| 38035              | Grand Forks, ND           | -0.296               | 27.35                     | 30.29                 |
| 38037              | Grant, ND                 | -0.303               | 26.71                     | 7.1                   |
| 38039              | Griggs, ND                | -0.424               | 15.44                     | 7.32                  |
| 38041              | Hettinger, ND             | -0.366               | 20.85                     | 5.61                  |
| 38043              | Kidder, ND                | -0.432               | 14.77                     | 2.9                   |
| 38045              | LaMoure, ND               | -0.518               | 9.27                      | 4.43                  |
| 38047              | Logan, ND                 | -0.52                | 9.01                      | 3.82                  |
| 38049              | McHenry, ND               | -0.547               | 7.77                      | 2.96                  |
| 38051              | McIntosh, ND              | -0.369               | 20.63                     | 10.61                 |
| 38053              | McKenzie, ND              | -0.73                | 1.72                      | 39.2                  |
| 38055              | McLean, ND                | -0.56                | 6.81                      | 8.34                  |
| 38057              | Mercer, ND                | -0.612               | 4.58                      | 10.16                 |
| 38059              | Morton, ND                | -0.508               | 9.68                      | 10.35                 |
| 38061              | Mountrail, ND             | -0.414               | 16.24                     | 37.58                 |
| 38063              | Nelson, ND                | -0.468               | 12.35                     | 3.5                   |
| 38065              | Oliver, ND                | -0.313               | 25.72                     | 21.08                 |
| 38067              | Pembina, ND               | -0.431               | 14.9                      | 4.17                  |
| 38069              | Pierce, ND                | -0.421               | 15.73                     | 19.14                 |
| 38071              | Ramsey, ND                | -0.571               | 6.27                      | 35.32                 |

| County FIPS | County Description | DOS-SVI Index | DOS-SVI Percentile | SVI Percentile |
|-------------|--------------------|---------------|--------------------|----------------|
| 38073       | Ransom, ND         | -0.547        | 7.74               | 8.57           |
| 38075       | Renville, ND       | -0.56         | 6.84               | 2.8            |
| 38077       | Richland, ND       | -0.374        | 20.06              | 12.17          |
| 38079       | Rolette, ND        | 0.146         | 66.41              | 90.7           |
| 38081       | Sargent, ND        | -0.495        | 10.38              | 2.32           |
| 38083       | Sheridan, ND       | -0.162        | 40.12              | 7.42           |
| 38085       | Sioux, ND          | 0.318         | 77.81              | 88.44          |
| 38087       | Slope, ND          | -0.308        | 26.27              | 1.37           |
| 38089       | Stark, ND          | -0.609        | 4.71               | 21.4           |
| 38091       | Steele, ND         | -0.535        | 8.4                | 0.19           |
| 38093       | Stutsman, ND       | -0.3          | 27.03              | 24.24          |
| 38095       | Towner, ND         | -0.453        | 13.37              | 19.46          |
| 38097       | Traill, ND         | -0.506        | 9.96               | 9.27           |
| 38099       | Walsh, ND          | -0.365        | 21.01              | 36.82          |
| 38101       | Ward, ND           | -0.535        | 8.34               | 16.78          |
| 38103       | Wells, ND          | -0.3          | 27.06              | 6.11           |
| 38105       | Williams, ND       | -0.754        | 1.5                | 25.1           |
| 39001       | Adams, OH          | 0.286         | 76.09              | 77.04          |
| 39003       | Allen, OH          | -0.145        | 41.45              | 57.93          |
| 39005       | Ashland, OH        | -0.337        | 23.37              | 43.34          |
| 39007       | Ashtabula, OH      | 0.083         | 61.99              | 78.57          |
| 39009       | Athens, OH         | 0.582         | 89.91              | 73.25          |
| 39011       | Auglaize, OH       | -0.584        | 5.73               | 5.35           |
| 39013       | Belmont, OH        | 0.033         | 57.56              | 35.96          |
| 39015       | Brown, OH          | -0.043        | 50.59              | 40.48          |
| 39017       | Butler, OH         | -0.321        | 24.8               | 36.18          |
| 39019       | Carroll, OH        | -0.152        | 40.88              | 15.38          |
| 39021       | Champaign, OH      | -0.167        | 39.57              | 29.78          |
| 39023       | Clark, OH          | -0.01         | 53.77              | 72.71          |
| 39025       | Clermont, OH       | -0.397        | 17.7               | 10.29          |
| 39027       | Clinton, OH        | -0.172        | 39.16              | 44.24          |
| 39029       | Columbiana, OH     | 0.003         | 54.95              | 48.54          |
| 39031       | Coshocton, OH      | -0.114        | 44.35              | 62.07          |
| 39033       | Crawford, OH       | -0.128        | 43.04              | 31.91          |
| 39035       | Cuyahoga, OH       | 0.057         | 59.82              | 68.09          |
| 39037       | Darke, OH          | -0.372        | 20.25              | 13.47          |
| 39039       | Defiance, OH       | -0.338        | 23.34              | 21.66          |
| 39041       | Delaware, OH       | -0.875        | 0.89               | 1.66           |
| 39043       | Erie, OH           | -0.18         | 38.43              | 29.14          |
| 39045       | Fairfield, OH      | -0.455        | 13.31              | 23.54          |
| 39047       | Fayette, OH        | -0.08         | 47.41              | 50.16          |
| 39049       | Franklin, OH       | -0.303        | 26.77              | 51.24          |
| 39051       | Fulton, OH         | -0.339        | 23.27              | 17.77          |
| 39053       | Gallia, OH         | 0.253         | 73.89              | 66.4           |
| 39055       | Geauga, OH         | -0.809        | 1.15               | 9.01           |
| 39057       | Greene, OH         | -0.248        | 31.45              | 20.76          |
| 39059       | Guernsey, OH       | 0.155         | 67.08              | 67.07          |
| 39061       | Hamilton, OH       | -0.271        | 29.51              | 53.69          |
| 39063       | Hancock, OH        | -0.381        | 19.48              | 21.11          |
| 39065       | Hardin, OH         | -0.108        | 44.89              | 47.1           |
| 39067       | Harrison, OH       | 0.071         | 60.81              | 51.94          |
| 39069       | Henry, OH          | -0.359        | 21.36              | 15.57          |
| 39071       | Highland, OH       | 0.1           | 63.32              | 68.98          |
| 39073       | Hocking, OH        | -0.008        | 53.93              | 46.85          |
| 39075       | Holmes, OH         | -1.114        | 0.32               | 43.6           |

| <b>County FIPS</b> | <b>County Description</b> | <b>DOS-SVI Index</b> | <b>DOS-SVI Percentile</b> | <b>SVI Percentile</b> |
|--------------------|---------------------------|----------------------|---------------------------|-----------------------|
| 39077              | Huron, OH                 | -0.275               | 29.23                     | 43.25                 |
| 39079              | Jackson, OH               | 0.332                | 78.48                     | 77.26                 |
| 39081              | Jefferson, OH             | 0.193                | 70.14                     | 54.94                 |
| 39083              | Knox, OH                  | -0.297               | 27.22                     | 29.43                 |
| 39085              | Lake, OH                  | -0.344               | 22.83                     | 12.93                 |
| 39087              | Lawrence, OH              | 0.226                | 72.17                     | 55.83                 |
| 39089              | Licking, OH               | -0.316               | 25.37                     | 22.9                  |
| 39091              | Logan, OH                 | -0.322               | 24.67                     | 31.69                 |
| 39093              | Lorain, OH                | -0.123               | 43.49                     | 50.89                 |
| 39095              | Lucas, OH                 | -0.002               | 54.6                      | 68.76                 |
| 39097              | Madison, OH               | -0.181               | 38.3                      | 33.82                 |
| 39099              | Mahoning, OH              | 0.089                | 62.53                     | 58.89                 |
| 39101              | Marion, OH                | 0.069                | 60.71                     | 64.14                 |
| 39103              | Medina, OH                | -0.643               | 3.38                      | 1.02                  |
| 39105              | Meigs, OH                 | 0.535                | 88.32                     | 67.87                 |
| 39107              | Mercer, OH                | -0.622               | 4.04                      | 5.1                   |
| 39109              | Miami, OH                 | -0.377               | 19.77                     | 11.91                 |
| 39111              | Monroe, OH                | 0.164                | 67.81                     | 44.3                  |
| 39113              | Montgomery, OH            | -0.052               | 49.79                     | 67.26                 |
| 39115              | Morgan, OH                | 0.227                | 72.24                     | 56.59                 |
| 39117              | Morrow, OH                | -0.384               | 19.13                     | 19.2                  |
| 39119              | Muskingum, OH             | 0.004                | 55.17                     | 59.81                 |
| 39121              | Noble, OH                 | 0.265                | 74.82                     | 42.93                 |
| 39123              | Ottawa, OH                | -0.1                 | 45.69                     | 15.41                 |
| 39125              | Paulding, OH              | -0.272               | 29.45                     | 28.85                 |
| 39127              | Perry, OH                 | 0.164                | 67.78                     | 55.45                 |
| 39129              | Pickaway, OH              | -0.215               | 34.96                     | 28.18                 |
| 39131              | Pike, OH                  | 0.447                | 84.53                     | 79.94                 |
| 39133              | Portage, OH               | -0.047               | 50.08                     | 24.55                 |
| 39135              | Preble, OH                | -0.261               | 30.4                      | 16.91                 |
| 39137              | Putnam, OH                | -0.628               | 3.79                      | 1.53                  |
| 39139              | Richland, OH              | -0.071               | 48.3                      | 61.69                 |
| 39141              | Ross, OH                  | 0.264                | 74.75                     | 72.55                 |
| 39143              | Sandusky, OH              | -0.186               | 37.82                     | 39.87                 |
| 39145              | Scioto, OH                | 0.339                | 78.83                     | 83.47                 |
| 39147              | Seneca, OH                | -0.18                | 38.33                     | 37.55                 |
| 39149              | Shelby, OH                | -0.491               | 10.73                     | 18.92                 |
| 39151              | Stark, OH                 | -0.208               | 35.56                     | 36.66                 |
| 39153              | Summit, OH                | -0.26                | 30.44                     | 33.34                 |
| 39155              | Trumbull, OH              | -0.1                 | 45.78                     | 46.4                  |
| 39157              | Tuscarawas, OH            | -0.29                | 27.92                     | 34.43                 |
| 39159              | Union, OH                 | -0.66                | 2.87                      | 7.71                  |
| 39161              | Van Wert, OH              | -0.312               | 25.79                     | 16.97                 |
| 39163              | Vinton, OH                | 0.605                | 90.51                     | 72.29                 |
| 39165              | Warren, OH                | -0.672               | 2.58                      | 4.78                  |
| 39167              | Washington, OH            | -0.027               | 51.89                     | 34.97                 |
| 39169              | Wayne, OH                 | -0.473               | 12.1                      | 47.9                  |
| 39171              | Williams, OH              | -0.229               | 33.52                     | 26.91                 |
| 39173              | Wood, OH                  | -0.221               | 34.26                     | 16.62                 |
| 39175              | Wyandot, OH               | -0.4                 | 17.48                     | 22.74                 |
| 40001              | Adair, OK                 | 0.307                | 77.43                     | 89.65                 |
| 40003              | Alfalfa, OK               | -0.088               | 46.77                     | 25.35                 |
| 40005              | Atoka, OK                 | 0.404                | 82.52                     | 80.76                 |
| 40007              | Beaver, OK                | -0.136               | 42.25                     | 45.54                 |
| 40009              | Beckham, OK               | -0.248               | 31.52                     | 71.18                 |

| <b>County FIPS</b> | <b>County Description</b> | <b>DOS-SVI Index</b> | <b>DOS-SVI Percentile</b> | <b>SVI Percentile</b> |
|--------------------|---------------------------|----------------------|---------------------------|-----------------------|
| 40011              | Blaine, OK                | 0.085                | 62.21                     | 66.78                 |
| 40013              | Bryan, OK                 | 0.128                | 65.08                     | 81.27                 |
| 40015              | Caddo, OK                 | 0.242                | 73.07                     | 94.59                 |
| 40017              | Canadian, OK              | -0.46                | 12.89                     | 26.21                 |
| 40019              | Carter, OK                | -0.005               | 54.22                     | 79.14                 |
| 40021              | Cherokee, OK              | 0.398                | 82.17                     | 92.71                 |
| 40023              | Choctaw, OK               | 0.533                | 88.12                     | 96.02                 |
| 40025              | Cimarron, OK              | -0.221               | 34.23                     | 44.75                 |
| 40027              | Cleveland, OK             | -0.254               | 30.91                     | 34.36                 |
| 40029              | Coal, OK                  | 0.216                | 71.51                     | 82.55                 |
| 40031              | Comanche, OK              | 0.08                 | 61.51                     | 83.54                 |
| 40033              | Cotton, OK                | 0.148                | 66.54                     | 67.42                 |
| 40035              | Craig, OK                 | 0.274                | 75.42                     | 85.38                 |
| 40037              | Creek, OK                 | -0.168               | 39.51                     | 49.01                 |
| 40039              | Custer, OK                | -0.255               | 30.85                     | 75.03                 |
| 40041              | Delaware, OK              | 0.601                | 90.42                     | 76.97                 |
| 40043              | Dewey, OK                 | -0.303               | 26.65                     | 22.48                 |
| 40045              | Ellis, OK                 | 0.023                | 56.67                     | 30.19                 |
| 40047              | Garfield, OK              | -0.238               | 32.7                      | 59.08                 |
| 40049              | Garvin, OK                | -0.192               | 37.28                     | 51.15                 |
| 40051              | Grady, OK                 | -0.237               | 32.79                     | 30.8                  |
| 40053              | Grant, OK                 | -0.24                | 32.6                      | 16.34                 |
| 40055              | Greer, OK                 | 0.591                | 90.19                     | 77.42                 |
| 40057              | Harmon, OK                | -0.032               | 51.58                     | 81.08                 |
| 40059              | Harper, OK                | -0.383               | 19.2                      | 31.85                 |
| 40061              | Haskell, OK               | 0.518                | 87.58                     | 87.36                 |
| 40063              | Hughes, OK                | 0.616                | 90.83                     | 81.15                 |
| 40065              | Jackson, OK               | -0.084               | 46.96                     | 82.26                 |
| 40067              | Jefferson, OK             | 0.393                | 81.82                     | 87.45                 |
| 40069              | Johnston, OK              | 0.407                | 82.65                     | 84.68                 |
| 40071              | Kay, OK                   | 0.048                | 59.12                     | 84.2                  |
| 40073              | Kingfisher, OK            | -0.228               | 33.72                     | 38.06                 |
| 40075              | Kiowa, OK                 | 0.168                | 68.04                     | 65.45                 |
| 40077              | Latimer, OK               | 0.449                | 84.62                     | 89.36                 |
| 40079              | Le Flore, OK              | 0.327                | 78.13                     | 90.32                 |
| 40081              | Lincoln, OK               | 0.066                | 60.46                     | 47.87                 |
| 40083              | Logan, OK                 | -0.119               | 43.87                     | 29.84                 |
| 40085              | Love, OK                  | 0.082                | 61.83                     | 62.93                 |
| 40087              | McClain, OK               | -0.37                | 20.57                     | 16.24                 |
| 40089              | McCurtain, OK             | 0.155                | 67.14                     | 91.37                 |
| 40091              | McIntosh, OK              | 0.592                | 90.23                     | 78.28                 |
| 40093              | Major, OK                 | -0.281               | 28.78                     | 32.04                 |
| 40095              | Marshall, OK              | 0.453                | 84.72                     | 85.45                 |
| 40097              | Mayes, OK                 | 0.177                | 68.77                     | 75.19                 |
| 40099              | Murray, OK                | 0.02                 | 56.35                     | 70.92                 |
| 40101              | Muskogee, OK              | 0.167                | 68                        | 93.38                 |
| 40103              | Noble, OK                 | -0.191               | 37.47                     | 33.85                 |
| 40105              | Nowata, OK                | 0.304                | 77.24                     | 58.95                 |
| 40107              | Okfuskee, OK              | 0.527                | 87.97                     | 92.87                 |
| 40109              | Oklahoma, OK              | -0.242               | 32.31                     | 68.18                 |
| 40111              | Okmulgee, OK              | 0.449                | 84.59                     | 86.59                 |
| 40113              | Osage, OK                 | 0.182                | 69.12                     | 62.39                 |
| 40115              | Ottawa, OK                | 0.211                | 71.06                     | 95.76                 |
| 40117              | Pawnee, OK                | -0.014               | 53.17                     | 54.24                 |
| 40119              | Payne, OK                 | 0.06                 | 60.08                     | 51.31                 |



| <b>County FIPS</b> | <b>County Description</b> | <b>DOS-SVI Index</b> | <b>DOS-SVI Percentile</b> | <b>SVI Percentile</b> |
|--------------------|---------------------------|----------------------|---------------------------|-----------------------|
| 40121              | Pittsburg, OK             | 0.268                | 75.01                     | 82.64                 |
| 40123              | Pontotoc, OK              | -0.051               | 49.83                     | 65                    |
| 40125              | Pottawatomie, OK          | 0.061                | 60.17                     | 78.15                 |
| 40127              | Pushmataha, OK            | 0.414                | 82.9                      | 78.63                 |
| 40129              | Roger Mills, OK           | 0.037                | 58.13                     | 40.03                 |
| 40131              | Rogers, OK                | -0.258               | 30.59                     | 28.34                 |
| 40133              | Seminole, OK              | 0.316                | 77.75                     | 92.9                  |
| 40135              | Sequoyah, OK              | 0.513                | 87.39                     | 91.59                 |
| 40137              | Stephens, OK              | 0.065                | 60.4                      | 60.51                 |
| 40139              | Texas, OK                 | -0.205               | 36.04                     | 82.1                  |
| 40141              | Tillman, OK               | 0.059                | 59.98                     | 87.1                  |
| 40143              | Tulsa, OK                 | -0.263               | 30.25                     | 61.59                 |
| 40145              | Wagoner, OK               | -0.122               | 43.55                     | 42.45                 |
| 40147              | Washington, OK            | -0.193               | 37.19                     | 43.82                 |
| 40149              | Washita, OK               | -0.303               | 26.74                     | 40.45                 |
| 40151              | Woods, OK                 | -0.003               | 54.44                     | 31.4                  |
| 40153              | Woodward, OK              | -0.1                 | 45.88                     | 57.45                 |
| 41001              | Baker, OR                 | 0.302                | 77.11                     | 68.54                 |
| 41003              | Benton, OR                | -0.016               | 52.98                     | 34.9                  |
| 41005              | Clackamas, OR             | -0.44                | 14.07                     | 18.95                 |
| 41007              | Clatsop, OR               | -0.069               | 48.39                     | 51.85                 |
| 41009              | Columbia, OR              | 0.005                | 55.2                      | 40.25                 |
| 41011              | Coos, OR                  | 0.338                | 78.7                      | 74.3                  |
| 41013              | Crook, OR                 | 0.279                | 75.64                     | 57.29                 |
| 41015              | Curry, OR                 | 0.504                | 86.92                     | 48.79                 |
| 41017              | Deschutes, OR             | -0.297               | 27.28                     | 16.37                 |
| 41019              | Douglas, OR               | 0.335                | 78.51                     | 72.77                 |
| 41021              | Gilliam, OR               | 0.31                 | 77.56                     | 50.92                 |
| 41023              | Grant, OR                 | 0.423                | 83.32                     | 54.65                 |
| 41025              | Harney, OR                | 0.698                | 93.41                     | 71.08                 |
| 41027              | Hood River, OR            | -0.383               | 19.23                     | 54.55                 |
| 41029              | Jackson, OR               | 0.011                | 55.78                     | 73.54                 |
| 41031              | Jefferson, OR             | 0.465                | 85.39                     | 91.18                 |
| 41033              | Josephine, OR             | 0.266                | 74.91                     | 65.57                 |
| 41035              | Klamath, OR               | 0.347                | 79.4                      | 86.88                 |
| 41037              | Lake, OR                  | 0.292                | 76.44                     | 76.08                 |
| 41039              | Lane, OR                  | 0.108                | 63.77                     | 64.9                  |
| 41041              | Lincoln, OR               | 0.247                | 73.38                     | 55.22                 |
| 41043              | Linn, OR                  | 0.06                 | 60.05                     | 67.9                  |
| 41045              | Malheur, OR               | 0.243                | 73.1                      | 99.65                 |
| 41047              | Marion, OR                | -0.145               | 41.36                     | 85.35                 |
| 41049              | Morrow, OR                | -0.079               | 47.6                      | 76.43                 |
| 41051              | Multnomah, OR             | -0.288               | 28.27                     | 46.75                 |
| 41053              | Polk, OR                  | -0.004               | 54.31                     | 57.77                 |
| 41055              | Sherman, OR               | 0.214                | 71.35                     | 13.5                  |
| 41057              | Tillamook, OR             | 0.006                | 55.4                      | 65.86                 |
| 41059              | Umatilla, OR              | 0.07                 | 60.78                     | 96.88                 |
| 41061              | Union, OR                 | -0.025               | 52.15                     | 67.29                 |
| 41063              | Wallowa, OR               | -0.01                | 53.74                     | 50.32                 |
| 41065              | Wasco, OR                 | -0.039               | 51                        | 83.89                 |
| 41067              | Washington, OR            | -0.477               | 11.75                     | 31.94                 |
| 41069              | Wheeler, OR               | 0.714                | 93.86                     | 39.01                 |
| 41071              | Yamhill, OR               | -0.139               | 41.99                     | 66.08                 |
| 42001              | Adams, PA                 | -0.265               | 30.09                     | 21.18                 |
| 42003              | Allegheny, PA             | -0.336               | 23.46                     | 25.06                 |

| <b>County FIPS</b> | <b>County Description</b> | <b>DOS-SVI Index</b> | <b>DOS-SVI Percentile</b> | <b>SVI Percentile</b> |
|--------------------|---------------------------|----------------------|---------------------------|-----------------------|
| 42005              | Armstrong, PA             | 0.029                | 57.02                     | 24.75                 |
| 42007              | Beaver, PA                | -0.235               | 32.95                     | 24.81                 |
| 42009              | Bedford, PA               | -0.025               | 52.21                     | 27.29                 |
| 42011              | Berks, PA                 | -0.146               | 41.26                     | 61.62                 |
| 42013              | Blair, PA                 | -0.138               | 42.12                     | 39.81                 |
| 42015              | Bradford, PA              | -0.198               | 36.71                     | 34.71                 |
| 42017              | Bucks, PA                 | -0.487               | 10.98                     | 8.31                  |
| 42019              | Butler, PA                | -0.4                 | 17.51                     | 7.9                   |
| 42021              | Cambria, PA               | -0.007               | 54.03                     | 48.92                 |
| 42023              | Cameron, PA               | -0.03                | 51.7                      | 30.06                 |
| 42025              | Carbon, PA                | -0.029               | 51.77                     | 30.48                 |
| 42027              | Centre, PA                | -0.176               | 38.91                     | 28.92                 |
| 42029              | Chester, PA               | -0.591               | 5.35                      | 14.36                 |
| 42031              | Clarion, PA               | 0.102                | 63.48                     | 47.71                 |
| 42033              | Clearfield, PA            | 0.248                | 73.54                     | 60.54                 |
| 42035              | Clinton, PA               | -0.016               | 53.01                     | 48.6                  |
| 42037              | Columbia, PA              | -0.044               | 50.49                     | 27.68                 |
| 42039              | Crawford, PA              | -0.042               | 50.68                     | 50.64                 |
| 42041              | Cumberland, PA            | -0.425               | 15.41                     | 16.15                 |
| 42043              | Dauphin, PA               | -0.308               | 26.3                      | 49.75                 |
| 42045              | Delaware, PA              | -0.385               | 18.98                     | 41.31                 |
| 42047              | Elk, PA                   | -0.29                | 28.02                     | 11.66                 |
| 42049              | Erie, PA                  | -0.161               | 40.21                     | 61.94                 |
| 42051              | Fayette, PA               | 0.177                | 68.67                     | 62.48                 |
| 42053              | Forest, PA                | 1.149                | 98.69                     | 71.15                 |
| 42055              | Franklin, PA              | -0.237               | 32.73                     | 33.73                 |
| 42057              | Fulton, PA                | 0.006                | 55.43                     | 22.01                 |
| 42059              | Greene, PA                | 0.07                 | 60.74                     | 43.5                  |
| 42061              | Huntingdon, PA            | 0.135                | 65.68                     | 49.08                 |
| 42063              | Indiana, PA               | 0.126                | 65.04                     | 54.84                 |
| 42065              | Jefferson, PA             | -0.191               | 37.41                     | 33.12                 |
| 42067              | Juniata, PA               | -0.291               | 27.89                     | 44.84                 |
| 42069              | Lackawanna, PA            | -0.231               | 33.4                      | 52.52                 |
| 42071              | Lancaster, PA             | -0.487               | 10.95                     | 45.73                 |
| 42073              | Lawrence, PA              | -0.034               | 51.35                     | 46.94                 |
| 42075              | Lebanon, PA               | -0.295               | 27.48                     | 53.28                 |
| 42077              | Lehigh, PA                | -0.195               | 37.06                     | 63.5                  |
| 42079              | Luzerne, PA               | -0.085               | 46.93                     | 60.89                 |
| 42081              | Lycoming, PA              | -0.134               | 42.57                     | 42.1                  |
| 42083              | McKean, PA                | 0.077                | 61.35                     | 54.62                 |
| 42085              | Mercer, PA                | -0.094               | 46.29                     | 54.2                  |
| 42087              | Mifflin, PA               | -0.296               | 27.44                     | 47.23                 |
| 42089              | Monroe, PA                | 0.063                | 60.33                     | 30.64                 |
| 42091              | Montgomery, PA            | -0.525               | 8.82                      | 16.53                 |
| 42093              | Montour, PA               | -0.531               | 8.56                      | 31.11                 |
| 42095              | Northampton, PA           | -0.272               | 29.42                     | 28.76                 |
| 42097              | Northumberland, PA        | -0.19                | 37.63                     | 50.06                 |
| 42099              | Perry, PA                 | -0.312               | 25.76                     | 10.89                 |
| 42101              | Philadelphia, PA          | 0.069                | 60.65                     | 92.04                 |
| 42103              | Pike, PA                  | 0.03                 | 57.21                     | 12.87                 |
| 42105              | Potter, PA                | 0.128                | 65.14                     | 44.17                 |
| 42107              | Schuylkill, PA            | -0.045               | 50.3                      | 45.06                 |
| 42109              | Snyder, PA                | -0.388               | 18.56                     | 22.99                 |
| 42111              | Somerset, PA              | 0.012                | 55.84                     | 42.26                 |
| 42113              | Sullivan, PA              | 0.467                | 85.55                     | 35.76                 |

| <b>County FIPS</b> | <b>County Description</b> | <b>DOS-SVI Index</b> | <b>DOS-SVI Percentile</b> | <b>SVI Percentile</b> |
|--------------------|---------------------------|----------------------|---------------------------|-----------------------|
| 42115              | Susquehanna, PA           | -0.008               | 54                        | 20.64                 |
| 42117              | Tioga, PA                 | 0.084                | 62.05                     | 31.53                 |
| 42119              | Union, PA                 | -0.168               | 39.48                     | 36.05                 |
| 42121              | Venango, PA               | 0.091                | 62.75                     | 42.29                 |
| 42123              | Warren, PA                | -0.072               | 48.17                     | 21.34                 |
| 42125              | Washington, PA            | -0.286               | 28.37                     | 16.94                 |
| 42127              | Wayne, PA                 | 0.096                | 63.07                     | 26.31                 |
| 42129              | Westmoreland, PA          | -0.26                | 30.47                     | 13.79                 |
| 42131              | Wyoming, PA               | -0.126               | 43.14                     | 11.21                 |
| 42133              | York, PA                  | -0.301               | 26.97                     | 32.9                  |
| 44001              | Bristol, RI               | -0.496               | 10.35                     | 12.36                 |
| 44003              | Kent, RI                  | -0.248               | 31.58                     | 15.19                 |
| 44005              | Newport, RI               | -0.346               | 22.6                      | 17.9                  |
| 44007              | Providence, RI            | -0.079               | 47.69                     | 75.92                 |
| 44009              | Washington, RI            | -0.234               | 33.05                     | 8.89                  |
| 45001              | Abbeville, SC             | 0.587                | 90.1                      | 85.64                 |
| 45003              | Aiken, SC                 | 0.213                | 71.22                     | 66.66                 |
| 45005              | Allendale, SC             | 1.456                | 99.65                     | 99.3                  |
| 45007              | Anderson, SC              | 0.021                | 56.48                     | 70.1                  |
| 45009              | Bamberg, SC               | 0.705                | 93.6                      | 95.16                 |
| 45011              | Barnwell, SC              | 0.675                | 92.77                     | 99.04                 |
| 45013              | Beaufort, SC              | -0.037               | 51.07                     | 40.06                 |
| 45015              | Berkeley, SC              | -0.049               | 49.98                     | 51.46                 |
| 45017              | Calhoun, SC               | 0.447                | 84.5                      | 56.27                 |
| 45019              | Charleston, SC            | -0.224               | 34.03                     | 31.56                 |
| 45021              | Cherokee, SC              | 0.342                | 79.08                     | 69.78                 |
| 45023              | Chester, SC               | 0.377                | 81.25                     | 73.63                 |
| 45025              | Chesterfield, SC          | 0.605                | 90.48                     | 94.87                 |
| 45027              | Clarendon, SC             | 1.121                | 98.41                     | 97.93                 |
| 45029              | Colleton, SC              | 0.643                | 91.72                     | 80                    |
| 45031              | Darlington, SC            | 0.759                | 94.68                     | 92.68                 |
| 45033              | Dillon, SC                | 0.753                | 94.62                     | 96.82                 |
| 45035              | Dorchester, SC            | -0.123               | 43.39                     | 41.88                 |
| 45037              | Edgefield, SC             | 0.421                | 83.22                     | 84.84                 |
| 45039              | Fairfield, SC             | 0.694                | 93.25                     | 74.84                 |
| 45041              | Florence, SC              | 0.252                | 73.83                     | 89.87                 |
| 45043              | Georgetown, SC            | 0.388                | 81.66                     | 67.71                 |
| 45045              | Greenville, SC            | -0.227               | 33.84                     | 50.38                 |
| 45047              | Greenwood, SC             | 0.297                | 76.79                     | 93.44                 |
| 45049              | Hampton, SC               | 0.83                 | 95.86                     | 80.32                 |
| 45051              | Horry, SC                 | 0.277                | 75.55                     | 61.02                 |
| 45053              | Jasper, SC                | 0.634                | 91.47                     | 94.49                 |
| 45055              | Kershaw, SC               | 0.293                | 76.57                     | 49.59                 |
| 45057              | Lancaster, SC             | 0.036                | 58.04                     | 51.21                 |
| 45059              | Laurens, SC               | 0.601                | 90.35                     | 91.72                 |
| 45061              | Lee, SC                   | 0.939                | 96.82                     | 92.1                  |
| 45063              | Lexington, SC             | -0.082               | 47.15                     | 44.2                  |
| 45065              | McCormick, SC             | 1.298                | 99.33                     | 73.73                 |
| 45067              | Marion, SC                | 0.728                | 94.27                     | 92.93                 |
| 45069              | Marlboro, SC              | 1.096                | 98.25                     | 98.69                 |
| 45071              | Newberry, SC              | 0.356                | 79.85                     | 92.32                 |
| 45073              | Oconee, SC                | 0.335                | 78.57                     | 72.93                 |
| 45075              | Orangeburg, SC            | 0.721                | 93.98                     | 92.29                 |
| 45077              | Pickens, SC               | 0.172                | 68.48                     | 59.9                  |
| 45079              | Richland, SC              | 0.082                | 61.86                     | 63.09                 |

| <b>County FIPS</b> | <b>County Description</b> | <b>DOS-SVI Index</b> | <b>DOS-SVI Percentile</b> | <b>SVI Percentile</b> |
|--------------------|---------------------------|----------------------|---------------------------|-----------------------|
| 45081              | Saluda, SC                | 0.358                | 79.97                     | 79.49                 |
| 45083              | Spartanburg, SC           | -0.013               | 53.3                      | 76.18                 |
| 45085              | Sumter, SC                | 0.605                | 90.45                     | 97.32                 |
| 45087              | Union, SC                 | 0.464                | 85.2                      | 86.78                 |
| 45089              | Williamsburg, SC          | 0.773                | 95.03                     | 97.04                 |
| 45091              | York, SC                  | -0.208               | 35.63                     | 36.62                 |
| 46003              | Aurora, SD                | -0.605               | 4.87                      | 27.26                 |
| 46005              | Beadle, SD                | -0.536               | 8.31                      | 65.06                 |
| 46007              | Bennett, SD               | 0.168                | 68.16                     | 79.27                 |
| 46009              | Bon Homme, SD             | -0.291               | 27.86                     | 23.82                 |
| 46011              | Brookings, SD             | -0.269               | 29.61                     | 15.61                 |
| 46013              | Brown, SD                 | -0.564               | 6.56                      | 32.87                 |
| 46015              | Brule, SD                 | -0.302               | 26.81                     | 57.13                 |
| 46017              | Buffalo, SD               | 0.678                | 92.84                     | 97.1                  |
| 46019              | Butte, SD                 | -0.165               | 39.83                     | 36.27                 |
| 46021              | Campbell, SD              | -0.52                | 9.11                      | 0.64                  |
| 46023              | Charles Mix, SD           | -0.126               | 43.2                      | 73.89                 |
| 46025              | Clark, SD                 | -0.486               | 11.14                     | 17.1                  |
| 46027              | Clay, SD                  | 0.243                | 73.13                     | 24.68                 |
| 46029              | Codington, SD             | -0.474               | 11.97                     | 24.49                 |
| 46031              | Corson, SD                | 1.127                | 98.47                     | 83.95                 |
| 46033              | Custer, SD                | 0.005                | 55.3                      | 22.8                  |
| 46035              | Davison, SD               | -0.355               | 21.65                     | 23.38                 |
| 46037              | Day, SD                   | -0.254               | 31.01                     | 18.5                  |
| 46039              | Deuel, SD                 | -0.551               | 7.51                      | 8.22                  |
| 46041              | Dewey, SD                 | 0.731                | 94.33                     | 88.31                 |
| 46043              | Douglas, SD               | -0.616               | 4.36                      | 15.03                 |
| 46045              | Edmunds, SD               | -0.606               | 4.84                      | 3.41                  |
| 46047              | Fall River, SD            | -0.022               | 52.5                      | 41.72                 |
| 46049              | Faulk, SD                 | -0.382               | 19.32                     | 7.77                  |
| 46051              | Grant, SD                 | -0.557               | 6.97                      | 5.51                  |
| 46053              | Gregory, SD               | -0.479               | 11.59                     | 28.47                 |
| 46055              | Haakon, SD                | -0.132               | 42.76                     | 36.24                 |
| 46057              | Hamlin, SD                | -0.914               | 0.7                       | 15.86                 |
| 46059              | Hand, SD                  | -0.519               | 9.17                      | 3.09                  |
| 46061              | Hanson, SD                | -0.819               | 1.11                      | 0.13                  |
| 46063              | Harding, SD               | -0.38                | 19.58                     | 8.28                  |
| 46065              | Hughes, SD                | -0.535               | 8.37                      | 40.61                 |
| 46067              | Hutchinson, SD            | -0.396               | 17.89                     | 24.87                 |
| 46069              | Hyde, SD                  | -0.417               | 16.01                     | 9.43                  |
| 46071              | Jackson, SD               | 0.251                | 73.7                      | 96.66                 |
| 46073              | Jerauld, SD               | -0.564               | 6.53                      | 5.06                  |
| 46075              | Jones, SD                 | 0.02                 | 56.32                     | 0.51                  |
| 46077              | Kingsbury, SD             | -0.582               | 5.79                      | 2.23                  |
| 46079              | Lake, SD                  | -0.311               | 25.91                     | 19.65                 |
| 46081              | Lawrence, SD              | -0.225               | 33.97                     | 26.18                 |
| 46083              | Lincoln, SD               | -0.932               | 0.54                      | 2.01                  |
| 46085              | Lyman, SD                 | -0.226               | 33.94                     | 71.37                 |
| 46087              | McCook, SD                | -0.526               | 8.72                      | 22.29                 |
| 46089              | McPherson, SD             | 0.28                 | 75.77                     | 28.89                 |
| 46091              | Marshall, SD              | -0.678               | 2.45                      | 21.31                 |
| 46093              | Meade, SD                 | -0.507               | 9.9                       | 8.92                  |
| 46095              | Mellette, SD              | 0.299                | 76.89                     | 91.56                 |
| 46097              | Miner, SD                 | -0.563               | 6.62                      | 10.57                 |
| 46099              | Minnehaha, SD             | -0.54                | 8.15                      | 35.89                 |

| <b>County FIPS</b> | <b>County Description</b> | <b>DOS-SVI Index</b> | <b>DOS-SVI Percentile</b> | <b>SVI Percentile</b> |
|--------------------|---------------------------|----------------------|---------------------------|-----------------------|
| 46101              | Moody, SD                 | -0.303               | 26.68                     | 39.08                 |
| 46102              | Oglala Lakota, SD         | 0.204                | 70.68                     | 99.43                 |
| 46103              | Pennington, SD            | -0.284               | 28.53                     | 41.62                 |
| 46105              | Perkins, SD               | -0.277               | 29                        | 10.96                 |
| 46107              | Potter, SD                | -0.25                | 31.26                     | 5.16                  |
| 46109              | Roberts, SD               | -0.14                | 41.9                      | 71.78                 |
| 46111              | Sanborn, SD               | -0.355               | 21.71                     | 3.85                  |
| 46115              | Spink, SD                 | -0.549               | 7.58                      | 17.68                 |
| 46117              | Stanley, SD               | -0.555               | 7.1                       | 10.99                 |
| 46119              | Sully, SD                 | -0.718               | 1.88                      | 0.73                  |
| 46121              | Todd, SD                  | 0.176                | 68.64                     | 95.64                 |
| 46123              | Tripp, SD                 | -0.093               | 46.45                     | 34.11                 |
| 46125              | Turner, SD                | -0.465               | 12.51                     | 10.8                  |
| 46127              | Union, SD                 | -0.681               | 2.32                      | 2.74                  |
| 46129              | Walworth, SD              | -0.34                | 23.21                     | 39.39                 |
| 46135              | Yankton, SD               | -0.294               | 27.64                     | 31.59                 |
| 46137              | Ziebach, SD               | 0.944                | 96.88                     | 95.38                 |
| 47001              | Anderson, TN              | 0.083                | 61.92                     | 60.64                 |
| 47003              | Bedford, TN               | -0.099               | 45.91                     | 77.58                 |
| 47005              | Benton, TN                | 0.674                | 92.68                     | 70.29                 |
| 47007              | Bledsoe, TN               | 0.964                | 97.14                     | 81.59                 |
| 47009              | Blount, TN                | -0.1                 | 45.75                     | 24.52                 |
| 47011              | Bradley, TN               | 0.053                | 59.47                     | 69.14                 |
| 47013              | Campbell, TN              | 0.551                | 88.79                     | 73.38                 |
| 47015              | Cannon, TN                | 0.091                | 62.72                     | 37.04                 |
| 47017              | Carroll, TN               | 0.338                | 78.73                     | 74.43                 |
| 47019              | Carter, TN                | 0.38                 | 81.38                     | 61.53                 |
| 47021              | Cheatham, TN              | -0.196               | 36.99                     | 23.69                 |
| 47023              | Chester, TN               | 0.341                | 78.96                     | 64.36                 |
| 47025              | Claiborne, TN             | 0.651                | 92.01                     | 71.02                 |
| 47027              | Clay, TN                  | 0.418                | 83.13                     | 59.39                 |
| 47029              | Cocke, TN                 | 0.834                | 95.92                     | 68.57                 |
| 47031              | Coffee, TN                | -0.062               | 49.03                     | 49.14                 |
| 47033              | Crockett, TN              | 0.069                | 60.68                     | 78.12                 |
| 47035              | Cumberland, TN            | 0.364                | 80.36                     | 53.73                 |
| 47037              | Davidson, TN              | -0.197               | 36.8                      | 53.63                 |
| 47039              | Decatur, TN               | 0.505                | 86.98                     | 50.86                 |
| 47041              | DeKalb, TN                | 0.046                | 58.99                     | 43.06                 |
| 47043              | Dickson, TN               | -0.164               | 39.92                     | 42.9                  |
| 47045              | Dyer, TN                  | 0.158                | 67.37                     | 75.96                 |
| 47047              | Fayette, TN               | 0.163                | 67.72                     | 25.54                 |
| 47049              | Fentress, TN              | 0.404                | 82.49                     | 63.73                 |
| 47051              | Franklin, TN              | 0.039                | 58.64                     | 37.64                 |
| 47053              | Gibson, TN                | 0.137                | 65.84                     | 73.5                  |
| 47055              | Giles, TN                 | 0.154                | 66.92                     | 60.32                 |
| 47057              | Grainger, TN              | 0.536                | 88.35                     | 59.3                  |
| 47059              | Greene, TN                | 0.438                | 83.83                     | 54.46                 |
| 47061              | Grundy, TN                | 0.728                | 94.17                     | 86.85                 |
| 47063              | Hamblen, TN               | 0.246                | 73.32                     | 81.46                 |
| 47065              | Hamilton, TN              | -0.123               | 43.46                     | 41.37                 |
| 47067              | Hancock, TN               | 0.75                 | 94.59                     | 76.66                 |
| 47069              | Hardeman, TN              | 1.079                | 98.06                     | 86.72                 |
| 47071              | Hardin, TN                | 0.314                | 77.65                     | 70.64                 |
| 47073              | Hawkins, TN               | 0.401                | 82.3                      | 70.8                  |
| 47075              | Haywood, TN               | 0.227                | 72.21                     | 87.17                 |

| <b>County FIPS</b> | <b>County Description</b> | <b>DOS-SVI Index</b> | <b>DOS-SVI Percentile</b> | <b>SVI Percentile</b> |
|--------------------|---------------------------|----------------------|---------------------------|-----------------------|
| 47077              | Henderson, TN             | 0.36                 | 80.17                     | 69.81                 |
| 47079              | Henry, TN                 | 0.438                | 83.76                     | 63.47                 |
| 47081              | Hickman, TN               | 0.288                | 76.19                     | 56.62                 |
| 47083              | Houston, TN               | 0.409                | 82.74                     | 55.51                 |
| 47085              | Humphreys, TN             | 0.336                | 78.64                     | 36.88                 |
| 47087              | Jackson, TN               | 0.717                | 93.89                     | 60                    |
| 47089              | Jefferson, TN             | 0.26                 | 74.37                     | 56.08                 |
| 47091              | Johnson, TN               | 0.509                | 87.14                     | 56.53                 |
| 47093              | Knox, TN                  | -0.219               | 34.35                     | 30.35                 |
| 47095              | Lake, TN                  | 0.921                | 96.56                     | 91.85                 |
| 47097              | Lauderdale, TN            | 0.442                | 84.14                     | 96.72                 |
| 47099              | Lawrence, TN              | 0.167                | 67.97                     | 83.18                 |
| 47101              | Lewis, TN                 | 0.029                | 57.15                     | 63.63                 |
| 47103              | Lincoln, TN               | -0.004               | 54.38                     | 67.77                 |
| 47105              | Loudon, TN                | -0.083               | 47.12                     | 38.63                 |
| 47107              | McMinn, TN                | 0.283                | 75.96                     | 65.51                 |
| 47109              | McNairy, TN               | 0.634                | 91.5                      | 71.72                 |
| 47111              | Macon, TN                 | 0.181                | 69.05                     | 69.27                 |
| 47113              | Madison, TN               | -0.062               | 49                        | 71.24                 |
| 47115              | Marion, TN                | 0.215                | 71.47                     | 50.61                 |
| 47117              | Marshall, TN              | 0.041                | 58.77                     | 60.99                 |
| 47119              | Maury, TN                 | -0.163               | 40.05                     | 39.49                 |
| 47121              | Meigs, TN                 | 0.541                | 88.6                      | 49.33                 |
| 47123              | Monroe, TN                | 0.548                | 88.7                      | 64.78                 |
| 47125              | Montgomery, TN            | -0.135               | 42.41                     | 51.72                 |
| 47127              | Moore, TN                 | -0.113               | 44.44                     | 9.14                  |
| 47129              | Morgan, TN                | 0.694                | 93.31                     | 74.94                 |
| 47131              | Obion, TN                 | 0.258                | 74.24                     | 76.94                 |
| 47133              | Overton, TN               | -0.014               | 53.23                     | 45.76                 |
| 47135              | Perry, TN                 | 0.625                | 91.15                     | 67.99                 |
| 47137              | Pickett, TN               | 0.388                | 81.63                     | 41.53                 |
| 47139              | Polk, TN                  | 0.353                | 79.72                     | 49.04                 |
| 47141              | Putnam, TN                | 0.081                | 61.67                     | 61.82                 |
| 47143              | Rhea, TN                  | 0.44                 | 84.08                     | 82.07                 |
| 47145              | Roane, TN                 | 0.283                | 75.9                      | 38.44                 |
| 47147              | Robertson, TN             | -0.198               | 36.77                     | 42.87                 |
| 47149              | Rutherford, TN            | -0.351               | 22.25                     | 32.68                 |
| 47151              | Scott, TN                 | 0.675                | 92.74                     | 76.37                 |
| 47153              | Sequatchie, TN            | 0.306                | 77.36                     | 57.2                  |
| 47155              | Sevier, TN                | 0.087                | 62.37                     | 61.11                 |
| 47157              | Shelby, TN                | 0                    | 54.76                     | 78.47                 |
| 47159              | Smith, TN                 | -0.061               | 49.16                     | 26.08                 |
| 47161              | Stewart, TN               | 0.367                | 80.61                     | 40.86                 |
| 47163              | Sullivan, TN              | 0.175                | 68.61                     | 54.11                 |
| 47165              | Sumner, TN                | -0.371               | 20.44                     | 20.57                 |
| 47167              | Tipton, TN                | 0.035                | 57.91                     | 45                    |
| 47169              | Trousdale, TN             | 0.575                | 89.62                     | 52.2                  |
| 47171              | Unicoi, TN                | 0.658                | 92.36                     | 79.81                 |
| 47173              | Union, TN                 | 0.508                | 87.11                     | 66.72                 |
| 47175              | Van Buren, TN             | 0.837                | 96.02                     | 60.25                 |
| 47177              | Warren, TN                | 0.224                | 72.02                     | 83.22                 |
| 47179              | Washington, TN            | 0.026                | 56.77                     | 45.89                 |
| 47181              | Wayne, TN                 | 0.548                | 88.73                     | 76.24                 |
| 47183              | Weakley, TN               | 0.262                | 74.56                     | 65.83                 |
| 47185              | White, TN                 | 0.315                | 77.68                     | 59.84                 |

| <b>County FIPS</b> | <b>County Description</b> | <b>DOS-SVI Index</b> | <b>DOS-SVI Percentile</b> | <b>SVI Percentile</b> |
|--------------------|---------------------------|----------------------|---------------------------|-----------------------|
| 47187              | Williamson, TN            | -0.89                | 0.83                      | 2.1                   |
| 47189              | Wilson, TN                | -0.412               | 16.43                     | 14.65                 |
| 48001              | Anderson, TX              | 0.196                | 70.3                      | 79.46                 |
| 48003              | Andrews, TX               | -0.415               | 16.14                     | 47.36                 |
| 48005              | Angelina, TX              | 0.247                | 73.42                     | 97.71                 |
| 48007              | Aransas, TX               | 0.385                | 81.53                     | 80.19                 |
| 48009              | Archer, TX                | -0.315               | 25.57                     | 8.98                  |
| 48011              | Armstrong, TX             | -0.463               | 12.67                     | 15.99                 |
| 48013              | Atascosa, TX              | 0.113                | 64.41                     | 84.97                 |
| 48015              | Austin, TX                | -0.249               | 31.36                     | 49.36                 |
| 48017              | Bailey, TX                | -0.362               | 21.14                     | 80.03                 |
| 48019              | Bandera, TX               | 0.416                | 83.03                     | 50.76                 |
| 48021              | Bastrop, TX               | 0.021                | 56.45                     | 74.59                 |
| 48023              | Baylor, TX                | -0.083               | 47.09                     | 15.54                 |
| 48025              | Bee, TX                   | 0.559                | 89.21                     | 96.94                 |
| 48027              | Bell, TX                  | -0.097               | 46.1                      | 80.51                 |
| 48029              | Bexar, TX                 | -0.088               | 46.74                     | 82.58                 |
| 48031              | Blanco, TX                | -0.034               | 51.38                     | 27.83                 |
| 48033              | Borden, TX                | -0.314               | 25.6                      | 6.21                  |
| 48035              | Bosque, TX                | 0.007                | 55.49                     | 61.75                 |
| 48037              | Bowie, TX                 | -0.037               | 51.16                     | 85.29                 |
| 48039              | Brazoria, TX              | -0.364               | 21.04                     | 51.34                 |
| 48041              | Brazos, TX                | -0.025               | 52.18                     | 65.32                 |
| 48043              | Brewster, TX              | 0.219                | 71.67                     | 65.73                 |
| 48045              | Briscoe, TX               | 0.111                | 64.15                     | 45.64                 |
| 48047              | Brooks, TX                | 1.142                | 98.57                     | 100                   |
| 48049              | Brown, TX                 | -0.037               | 51.1                      | 62.77                 |
| 48051              | Burleson, TX              | 0.114                | 64.5                      | 60.8                  |
| 48053              | Burnet, TX                | -0.067               | 48.65                     | 52.99                 |
| 48055              | Caldwell, TX              | -0.056               | 49.48                     | 87.32                 |
| 48057              | Calhoun, TX               | 0.034                | 57.69                     | 86.18                 |
| 48059              | Callahan, TX              | -0.006               | 54.16                     | 29.68                 |
| 48061              | Cameron, TX               | 0.117                | 64.76                     | 97.58                 |
| 48063              | Camp, TX                  | 0.047                | 59.03                     | 90.19                 |
| 48065              | Carson, TX                | -0.547               | 7.8                       | 3.38                  |
| 48067              | Cass, TX                  | 0.192                | 69.95                     | 78.41                 |
| 48069              | Castro, TX                | -0.335               | 23.53                     | 77.74                 |
| 48071              | Chambers, TX              | -0.233               | 33.24                     | 41.08                 |
| 48073              | Cherokee, TX              | -0.053               | 49.73                     | 91.91                 |
| 48075              | Childress, TX             | 0.697                | 93.35                     | 75                    |
| 48077              | Clay, TX                  | 0.145                | 66.35                     | 31.82                 |
| 48079              | Cochran, TX               | 0.187                | 69.63                     | 86.08                 |
| 48081              | Coke, TX                  | 0.182                | 69.09                     | 62.04                 |
| 48083              | Coleman, TX               | 0.011                | 55.75                     | 41.85                 |
| 48085              | Collin, TX                | -0.658               | 2.99                      | 15.06                 |
| 48087              | Collingsworth, TX         | 0.091                | 62.69                     | 88.76                 |
| 48089              | Colorado, TX              | -0.276               | 29.1                      | 68.47                 |
| 48091              | Comal, TX                 | -0.337               | 23.43                     | 23.79                 |
| 48093              | Comanche, TX              | 0.042                | 58.87                     | 72.64                 |
| 48095              | Concho, TX                | 0.349                | 79.47                     | 42.83                 |
| 48097              | Cooke, TX                 | -0.214               | 35.08                     | 62.26                 |
| 48099              | Coryell, TX               | 0.289                | 76.22                     | 78.09                 |
| 48101              | Cottle, TX                | 0.104                | 63.55                     | 93.63                 |
| 48103              | Crane, TX                 | -0.636               | 3.53                      | 47.39                 |
| 48105              | Crockett, TX              | -0.46                | 12.93                     | 68.92                 |

| <b>County FIPS</b> | <b>County Description</b> | <b>DOS-SVI Index</b> | <b>DOS-SVI Percentile</b> | <b>SVI Percentile</b> |
|--------------------|---------------------------|----------------------|---------------------------|-----------------------|
| 48107              | Crosby, TX                | 0.131                | 65.3                      | 93.95                 |
| 48109              | Culberson, TX             | 0.794                | 95.32                     | 99.71                 |
| 48111              | Dallam, TX                | -0.13                | 42.92                     | 55.03                 |
| 48113              | Dallas, TX                | -0.289               | 28.11                     | 75.38                 |
| 48115              | Dawson, TX                | 0.258                | 74.31                     | 94.75                 |
| 48117              | Deaf Smith, TX            | -0.167               | 39.6                      | 84.11                 |
| 48119              | Delta, TX                 | 0.095                | 63.04                     | 57.04                 |
| 48121              | Denton, TX                | -0.524               | 8.85                      | 22.1                  |
| 48123              | DeWitt, TX                | 0.115                | 64.66                     | 82.29                 |
| 48125              | Dickens, TX               | 0.77                 | 94.97                     | 87.96                 |
| 48127              | Dimmit, TX                | 0.975                | 97.23                     | 99.97                 |
| 48129              | Donley, TX                | -0.017               | 52.88                     | 45.25                 |
| 48131              | Duval, TX                 | 0.77                 | 94.94                     | 99.94                 |
| 48133              | Eastland, TX              | 0.328                | 78.25                     | 80.67                 |
| 48135              | Ector, TX                 | -0.124               | 43.33                     | 79.24                 |
| 48137              | Edwards, TX               | 0.538                | 88.44                     | 43.85                 |
| 48139              | Ellis, TX                 | -0.436               | 14.52                     | 39.24                 |
| 48141              | El Paso, TX               | 0.129                | 65.2                      | 95.35                 |
| 48143              | Erath, TX                 | -0.028               | 51.83                     | 62.52                 |
| 48145              | Falls, TX                 | 0.39                 | 81.69                     | 97.99                 |
| 48147              | Fannin, TX                | -0.025               | 52.24                     | 57.58                 |
| 48149              | Fayette, TX               | -0.246               | 31.77                     | 43.63                 |
| 48151              | Fisher, TX                | 0.129                | 65.23                     | 43.12                 |
| 48153              | Floyd, TX                 | -0.094               | 46.35                     | 82.99                 |
| 48155              | Foard, TX                 | 0.485                | 86.15                     | 47.83                 |
| 48157              | Fort Bend, TX             | -0.487               | 11.08                     | 28.73                 |
| 48159              | Franklin, TX              | -0.019               | 52.72                     | 52.77                 |
| 48161              | Freestone, TX             | 0.296                | 76.73                     | 84.3                  |
| 48163              | Frio, TX                  | 0.447                | 84.56                     | 98.66                 |
| 48165              | Gaines, TX                | -0.267               | 29.8                      | 68.25                 |
| 48167              | Galveston, TX             | -0.172               | 39.19                     | 58.5                  |
| 48169              | Garza, TX                 | 0.514                | 87.42                     | 72.13                 |
| 48171              | Gillespie, TX             | -0.208               | 35.75                     | 35.73                 |
| 48173              | Glasscock, TX             | -0.559               | 6.91                      | 17.61                 |
| 48175              | Goliad, TX                | 0.105                | 63.61                     | 58.15                 |
| 48177              | Gonzales, TX              | -0.159               | 40.37                     | 89.59                 |
| 48179              | Gray, TX                  | 0.011                | 55.72                     | 84.46                 |
| 48181              | Grayson, TX               | -0.117               | 44.06                     | 65.92                 |
| 48183              | Gregg, TX                 | -0.12                | 43.78                     | 88.25                 |
| 48185              | Grimes, TX                | 0.179                | 68.86                     | 86.02                 |
| 48187              | Guadalupe, TX             | -0.297               | 27.25                     | 43.44                 |
| 48189              | Hale, TX                  | 0.01                 | 55.65                     | 93.12                 |
| 48191              | Hall, TX                  | 0.522                | 87.71                     | 95                    |
| 48193              | Hamilton, TX              | -0.156               | 40.66                     | 60.83                 |
| 48195              | Hansford, TX              | -0.062               | 49.09                     | 76.15                 |
| 48197              | Hardeman, TX              | 0.281                | 75.8                      | 72.8                  |
| 48199              | Hardin, TX                | -0.111               | 44.48                     | 25.32                 |
| 48201              | Harris, TX                | -0.213               | 35.18                     | 72.36                 |
| 48203              | Harrison, TX              | -0.067               | 48.55                     | 73.06                 |
| 48205              | Hartley, TX               | -0.088               | 46.8                      | 53.44                 |
| 48207              | Haskell, TX               | 0.83                 | 95.83                     | 97.55                 |
| 48209              | Hays, TX                  | -0.2                 | 36.55                     | 49.24                 |
| 48211              | Hemphill, TX              | -0.333               | 23.69                     | 74.27                 |
| 48213              | Henderson, TX             | 0.201                | 70.52                     | 72.01                 |
| 48215              | Hidalgo, TX               | 0.138                | 65.93                     | 97.8                  |



| <b>County FIPS</b> | <b>County Description</b> | <b>DOS-SVI Index</b> | <b>DOS-SVI Percentile</b> | <b>SVI Percentile</b> |
|--------------------|---------------------------|----------------------|---------------------------|-----------------------|
| 48217              | Hill, TX                  | 0.173                | 68.51                     | 87.07                 |
| 48219              | Hockley, TX               | 0.114                | 64.56                     | 90.25                 |
| 48221              | Hood, TX                  | -0.237               | 32.76                     | 26.02                 |
| 48223              | Hopkins, TX               | -0.09                | 46.67                     | 70.67                 |
| 48225              | Houston, TX               | 0.295                | 76.66                     | 91.31                 |
| 48227              | Howard, TX                | 0.236                | 72.91                     | 91.53                 |
| 48229              | Hudspeth, TX              | 1.332                | 99.43                     | 98.25                 |
| 48231              | Hunt, TX                  | -0.031               | 51.61                     | 83.41                 |
| 48233              | Hutchinson, TX            | -0.033               | 51.48                     | 66.31                 |
| 48235              | Irion, TX                 | -0.157               | 40.62                     | 20.13                 |
| 48237              | Jack, TX                  | -0.018               | 52.85                     | 65.38                 |
| 48239              | Jackson, TX               | -0.133               | 42.63                     | 67.74                 |
| 48241              | Jasper, TX                | 0.344                | 79.24                     | 82.39                 |
| 48243              | Jeff Davis, TX            | 0.201                | 70.42                     | 36.11                 |
| 48245              | Jefferson, TX             | -0.001               | 54.73                     | 85.67                 |
| 48247              | Jim Hogg, TX              | 0.557                | 89.08                     | 99.17                 |
| 48249              | Jim Wells, TX             | 0.057                | 59.85                     | 92.26                 |
| 48251              | Johnson, TX               | -0.282               | 28.68                     | 50.73                 |
| 48253              | Jones, TX                 | 0.518                | 87.61                     | 63.28                 |
| 48255              | Karnes, TX                | 0.189                | 69.85                     | 84.24                 |
| 48257              | Kaufman, TX               | -0.149               | 41.07                     | 56.91                 |
| 48259              | Kendall, TX               | -0.432               | 14.84                     | 22.83                 |
| 48261              | Kenedy, TX                | 0.086                | 62.27                     | 73.28                 |
| 48263              | Kent, TX                  | 0.111                | 64.09                     | 44.27                 |
| 48265              | Kerr, TX                  | 0.153                | 66.83                     | 69.59                 |
| 48267              | Kimble, TX                | 0.254                | 74.02                     | 58.85                 |
| 48269              | King, TX                  | -0.068               | 48.46                     | 19.55                 |
| 48271              | Kinney, TX                | 0.933                | 96.75                     | 85.61                 |
| 48273              | Kleberg, TX               | 0.322                | 78                        | 98.34                 |
| 48275              | Knox, TX                  | 0.02                 | 56.38                     | 79.62                 |
| 48277              | Lamar, TX                 | 0.001                | 54.89                     | 83.57                 |
| 48279              | Lamb, TX                  | -0.102               | 45.53                     | 89.75                 |
| 48281              | Lampasas, TX              | 0.083                | 61.95                     | 54.43                 |
| 48283              | La Salle, TX              | 0.305                | 77.3                      | 81.91                 |
| 48285              | Lavaca, TX                | -0.369               | 20.69                     | 68.79                 |
| 48287              | Lee, TX                   | -0.159               | 40.4                      | 67.52                 |
| 48289              | Leon, TX                  | 0.255                | 74.05                     | 61.56                 |
| 48291              | Liberty, TX               | 0.248                | 73.48                     | 94.27                 |
| 48293              | Limestone, TX             | 0.438                | 83.8                      | 95.32                 |
| 48295              | Lipscomb, TX              | -0.18                | 38.4                      | 46.05                 |
| 48297              | Live Oak, TX              | 0.231                | 72.46                     | 69.17                 |
| 48299              | Llano, TX                 | 0.377                | 81.28                     | 46.66                 |
| 48301              | Loving, TX                | -0.381               | 19.42                     | 75.73                 |
| 48303              | Lubbock, TX               | -0.129               | 42.98                     | 74.97                 |
| 48305              | Lynn, TX                  | 0.303                | 77.17                     | 89.08                 |
| 48307              | McCulloch, TX             | -0.036               | 51.23                     | 73.95                 |
| 48309              | McLennan, TX              | -0.133               | 42.66                     | 84.36                 |
| 48311              | McMullen, TX              | 0.585                | 90                        | 76.31                 |
| 48313              | Madison, TX               | 0.091                | 62.78                     | 83.76                 |
| 48315              | Marion, TX                | 0.912                | 96.47                     | 68.85                 |
| 48317              | Martin, TX                | -0.586               | 5.6                       | 42.39                 |
| 48319              | Mason, TX                 | 0.147                | 66.44                     | 35.7                  |
| 48321              | Matagorda, TX             | 0.239                | 73                        | 90.67                 |
| 48323              | Maverick, TX              | 0.465                | 85.36                     | 97.42                 |
| 48325              | Medina, TX                | 0.085                | 62.08                     | 66.97                 |

| <b>County FIPS</b> | <b>County Description</b> | <b>DOS-SVI Index</b> | <b>DOS-SVI Percentile</b> | <b>SVI Percentile</b> |
|--------------------|---------------------------|----------------------|---------------------------|-----------------------|
| 48327              | Menard, TX                | 0.215                | 71.38                     | 58.54                 |
| 48329              | Midland, TX               | -0.626               | 3.85                      | 47.48                 |
| 48331              | Milam, TX                 | -0.1                 | 45.84                     | 76.27                 |
| 48333              | Mills, TX                 | 0.034                | 57.66                     | 76.88                 |
| 48335              | Mitchell, TX              | 0.222                | 71.95                     | 62.13                 |
| 48337              | Montague, TX              | 0.015                | 56.03                     | 58.41                 |
| 48339              | Montgomery, TX            | -0.432               | 14.87                     | 39.14                 |
| 48341              | Moore, TX                 | -0.192               | 37.34                     | 69.9                  |
| 48343              | Morris, TX                | 0.211                | 71.09                     | 72.99                 |
| 48345              | Motley, TX                | -0.164               | 39.86                     | 70.03                 |
| 48347              | Nacogdoches, TX           | 0.426                | 83.38                     | 98.22                 |
| 48349              | Navarro, TX               | 0.2                  | 70.36                     | 96.62                 |
| 48351              | Newton, TX                | 0.657                | 92.3                      | 72.07                 |
| 48353              | Nolan, TX                 | 0.004                | 55.05                     | 88.66                 |
| 48355              | Nueces, TX                | -0.123               | 43.36                     | 83.63                 |
| 48357              | Ochiltree, TX             | -0.317               | 25.31                     | 57.87                 |
| 48359              | Oldham, TX                | -0.439               | 14.14                     | 43.22                 |
| 48361              | Orange, TX                | -0.127               | 43.08                     | 58.12                 |
| 48363              | Palo Pinto, TX            | 0.152                | 66.73                     | 87.99                 |
| 48365              | Panola, TX                | 0.118                | 64.82                     | 69.52                 |
| 48367              | Parker, TX                | -0.32                | 24.86                     | 25.61                 |
| 48369              | Parmer, TX                | -0.48                | 11.46                     | 75.76                 |
| 48371              | Pecos, TX                 | 0.075                | 61.22                     | 82.13                 |
| 48373              | Polk, TX                  | 0.438                | 83.89                     | 91.21                 |
| 48375              | Potter, TX                | -0.246               | 31.84                     | 92.48                 |
| 48377              | Presidio, TX              | 0.997                | 97.39                     | 99.81                 |
| 48379              | Rains, TX                 | 0.068                | 60.62                     | 40.16                 |
| 48381              | Randall, TX               | -0.448               | 13.47                     | 22.04                 |
| 48383              | Reagan, TX                | -0.011               | 53.58                     | 48.06                 |
| 48385              | Real, TX                  | 0.338                | 78.77                     | 71.69                 |
| 48387              | Red River, TX             | 0.468                | 85.58                     | 56.5                  |
| 48389              | Reeves, TX                | 0.299                | 76.92                     | 78.03                 |
| 48391              | Refugio, TX               | 0.515                | 87.52                     | 94.14                 |
| 48393              | Roberts, TX               | -0.648               | 3.25                      | 9.11                  |
| 48395              | Robertson, TX             | -0.046               | 50.21                     | 75.29                 |
| 48397              | Rockwall, TX              | -0.66                | 2.83                      | 11.24                 |
| 48399              | Runnels, TX               | -0.162               | 40.18                     | 54.49                 |
| 48401              | Rusk, TX                  | 0.186                | 69.6                      | 79.65                 |
| 48403              | Sabine, TX                | 0.773                | 95                        | 53.09                 |
| 48405              | San Augustine, TX         | 0.79                 | 95.22                     | 88.89                 |
| 48407              | San Jacinto, TX           | 0.396                | 82.08                     | 68.69                 |
| 48409              | San Patricio, TX          | -0.233               | 33.27                     | 83.09                 |
| 48411              | San Saba, TX              | 0.09                 | 62.59                     | 73.15                 |
| 48413              | Schleicher, TX            | 0.081                | 61.7                      | 58.57                 |
| 48415              | Scurry, TX                | -0.184               | 37.89                     | 69.94                 |
| 48417              | Shackelford, TX           | 0.132                | 65.39                     | 68.5                  |
| 48419              | Shelby, TX                | 0.444                | 84.24                     | 95.22                 |
| 48421              | Sherman, TX               | -0.219               | 34.45                     | 46.11                 |
| 48423              | Smith, TX                 | -0.01                | 53.68                     | 74.62                 |
| 48425              | Somervell, TX             | -0.359               | 21.3                      | 56.05                 |
| 48427              | Starr, TX                 | 0.759                | 94.72                     | 98.15                 |
| 48429              | Stephens, TX              | 0.442                | 84.18                     | 88.5                  |
| 48431              | Sterling, TX              | -0.375               | 19.99                     | 41.27                 |
| 48433              | Stonewall, TX             | -0.208               | 35.69                     | 32.36                 |
| 48435              | Sutton, TX                | -0.193               | 37.15                     | 60.41                 |

| <b>County FIPS</b> | <b>County Description</b> | <b>DOS-SVI Index</b> | <b>DOS-SVI Percentile</b> | <b>SVI Percentile</b> |
|--------------------|---------------------------|----------------------|---------------------------|-----------------------|
| 48437              | Swisher, TX               | 0.178                | 68.83                     | 97.01                 |
| 48439              | Tarrant, TX               | -0.383               | 19.17                     | 54.75                 |
| 48441              | Taylor, TX                | -0.18                | 38.36                     | 69.33                 |
| 48443              | Terrell, TX               | 0.745                | 94.46                     | 47.13                 |
| 48445              | Terry, TX                 | 0.394                | 81.85                     | 98.76                 |
| 48447              | Throckmorton, TX          | 0.238                | 72.97                     | 26.78                 |
| 48449              | Titus, TX                 | -0.044               | 50.56                     | 89.01                 |
| 48451              | Tom Green, TX             | -0.175               | 38.94                     | 66.43                 |
| 48453              | Travis, TX                | -0.396               | 17.86                     | 38.12                 |
| 48455              | Trinity, TX               | 0.701                | 93.5                      | 80.16                 |
| 48457              | Tyler, TX                 | 0.619                | 90.99                     | 88.34                 |
| 48459              | Upshur, TX                | 0.112                | 64.22                     | 58.98                 |
| 48461              | Upton, TX                 | -0.399               | 17.54                     | 65.19                 |
| 48463              | Uvalde, TX                | 0.185                | 69.5                      | 95.48                 |
| 48465              | Val Verde, TX             | 0.074                | 61.13                     | 96.78                 |
| 48467              | Van Zandt, TX             | 0.079                | 61.45                     | 55.89                 |
| 48469              | Victoria, TX              | -0.125               | 43.27                     | 78.34                 |
| 48471              | Walker, TX                | 0.377                | 81.12                     | 69.97                 |
| 48473              | Waller, TX                | 0.076                | 61.25                     | 83.31                 |
| 48475              | Ward, TX                  | -0.067               | 48.62                     | 64.94                 |
| 48477              | Washington, TX            | 0.037                | 58.17                     | 73.12                 |
| 48479              | Webb, TX                  | -0.126               | 43.17                     | 94.97                 |
| 48481              | Wharton, TX               | -0.083               | 47.05                     | 87.58                 |
| 48483              | Wheeler, TX               | -0.214               | 35.05                     | 69.62                 |
| 48485              | Wichita, TX               | 0.031                | 57.4                      | 81.66                 |
| 48487              | Wilbarger, TX             | 0.061                | 60.14                     | 90.83                 |
| 48489              | Willacy, TX               | 1.061                | 97.96                     | 98.92                 |
| 48491              | Williamson, TX            | -0.519               | 9.23                      | 20.16                 |
| 48493              | Wilson, TX                | -0.102               | 45.37                     | 44.36                 |
| 48495              | Winkler, TX               | -0.161               | 40.24                     | 65.41                 |
| 48497              | Wise, TX                  | -0.002               | 54.63                     | 57.68                 |
| 48499              | Wood, TX                  | 0.263                | 74.66                     | 63.22                 |
| 48501              | Yoakum, TX                | -0.369               | 20.73                     | 49.2                  |
| 48503              | Young, TX                 | -0.289               | 28.14                     | 55.32                 |
| 48505              | Zapata, TX                | 0.527                | 87.93                     | 98.95                 |
| 48507              | Zavala, TX                | 0.802                | 95.45                     | 99.87                 |
| 49001              | Beaver, UT                | -0.722               | 1.85                      | 25.22                 |
| 49003              | Box Elder, UT             | -0.664               | 2.77                      | 15.92                 |
| 49005              | Cache, UT                 | -0.706               | 2.01                      | 32.01                 |
| 49007              | Carbon, UT                | -0.205               | 35.88                     | 56.15                 |
| 49009              | Daggett, UT               | -0.241               | 32.47                     | 7.55                  |
| 49011              | Davis, UT                 | -0.9                 | 0.76                      | 7.96                  |
| 49013              | Duchesne, UT              | -0.409               | 16.75                     | 48.22                 |
| 49015              | Emery, UT                 | -0.43                | 15.03                     | 26.27                 |
| 49017              | Garfield, UT              | -0.179               | 38.49                     | 45.92                 |
| 49019              | Grand, UT                 | -0.247               | 31.68                     | 52.13                 |
| 49021              | Iron, UT                  | -0.372               | 20.31                     | 45.25                 |
| 49023              | Juab, UT                  | -0.932               | 0.51                      | 23.31                 |
| 49025              | Kane, UT                  | -0.31                | 26.11                     | 10.54                 |
| 49027              | Millard, UT               | -0.644               | 3.34                      | 35.54                 |
| 49029              | Morgan, UT                | -1.135               | 0.26                      | 0.03                  |
| 49031              | Piute, UT                 | 0.183                | 69.18                     | 27.13                 |
| 49033              | Rich, UT                  | -0.789               | 1.24                      | 19.71                 |
| 49035              | Salt Lake, UT             | -0.649               | 3.22                      | 32.29                 |
| 49037              | San Juan, UT              | 0.072                | 60.94                     | 97.52                 |

| <b>County FIPS</b> | <b>County Description</b> | <b>DOS-SVI Index</b> | <b>DOS-SVI Percentile</b> | <b>SVI Percentile</b> |
|--------------------|---------------------------|----------------------|---------------------------|-----------------------|
| 49039              | Sanpete, UT               | -0.155               | 40.69                     | 60.19                 |
| 49041              | Sevier, UT                | -0.325               | 24.29                     | 32.61                 |
| 49043              | Summit, UT                | -0.925               | 0.67                      | 5                     |
| 49045              | Tooele, UT                | -0.621               | 4.11                      | 31.43                 |
| 49047              | Uintah, UT                | -0.44                | 14.04                     | 48.38                 |
| 49049              | Utah, UT                  | -0.897               | 0.8                       | 27.8                  |
| 49051              | Wasatch, UT               | -1.092               | 0.35                      | 6.43                  |
| 49053              | Washington, UT            | -0.533               | 8.44                      | 41.43                 |
| 49055              | Wayne, UT                 | -0.635               | 3.57                      | 29.08                 |
| 49057              | Weber, UT                 | -0.559               | 6.88                      | 42.71                 |
| 50001              | Addison, VT               | -0.2                 | 36.68                     | 9.65                  |
| 50003              | Bennington, VT            | -0.236               | 32.89                     | 29.24                 |
| 50005              | Caledonia, VT             | -0.16                | 40.34                     | 26.72                 |
| 50007              | Chittenden, VT            | -0.375               | 19.96                     | 18.31                 |
| 50009              | Essex, VT                 | 0.087                | 62.43                     | 20.67                 |
| 50011              | Franklin, VT              | -0.446               | 13.63                     | 11.11                 |
| 50013              | Grand Isle, VT            | -0.272               | 29.48                     | 0.25                  |
| 50015              | Lamoille, VT              | -0.35                | 22.29                     | 13.09                 |
| 50017              | Orange, VT                | -0.172               | 39.26                     | 17.2                  |
| 50019              | Orleans, VT               | -0.123               | 43.52                     | 42.58                 |
| 50021              | Rutland, VT               | -0.386               | 18.75                     | 27.87                 |
| 50023              | Washington, VT            | -0.376               | 19.9                      | 17.52                 |
| 50025              | Windham, VT               | -0.136               | 42.28                     | 30.54                 |
| 50027              | Windsor, VT               | -0.259               | 30.5                      | 12.8                  |
| 51001              | Accomack, VA              | 0.082                | 61.76                     | 80.25                 |
| 51003              | Albemarle, VA             | -0.447               | 13.5                      | 17.32                 |
| 51005              | Alleghany, VA             | 0.163                | 67.69                     | 44.62                 |
| 51007              | Amelia, VA                | -0.105               | 45.15                     | 31.66                 |
| 51009              | Amherst, VA               | 0.087                | 62.34                     | 46.82                 |
| 51011              | Appomattox, VA            | 0.03                 | 57.27                     | 36.37                 |
| 51013              | Arlington, VA             | -0.679               | 2.39                      | 14.01                 |
| 51015              | Augusta, VA               | -0.214               | 35.15                     | 14.9                  |
| 51017              | Bath, VA                  | 0.332                | 78.42                     | 24.71                 |
| 51019              | Bedford, VA               | -0.178               | 38.55                     | 9.84                  |
| 51021              | Bland, VA                 | 0.352                | 79.66                     | 34.49                 |
| 51023              | Botetourt, VA             | -0.257               | 30.66                     | 4.14                  |
| 51025              | Brunswick, VA             | 0.796                | 95.35                     | 89.55                 |
| 51027              | Buchanan, VA              | 1.03                 | 97.71                     | 75.45                 |
| 51029              | Buckingham, VA            | 0.652                | 92.07                     | 79.01                 |
| 51031              | Campbell, VA              | -0.041               | 50.81                     | 26.15                 |
| 51033              | Caroline, VA              | -0.202               | 36.33                     | 34.81                 |
| 51035              | Carroll, VA               | 0.148                | 66.57                     | 33.69                 |
| 51036              | Charles City, VA          | 0.32                 | 77.84                     | 23.66                 |
| 51037              | Charlotte, VA             | 0.462                | 85.1                      | 70.57                 |
| 51041              | Chesterfield, VA          | -0.419               | 15.89                     | 17.99                 |
| 51043              | Clarke, VA                | -0.454               | 13.34                     | 11.31                 |
| 51045              | Craig, VA                 | -0.196               | 37.03                     | 7.45                  |
| 51047              | Culpeper, VA              | -0.431               | 14.93                     | 48.82                 |
| 51049              | Cumberland, VA            | 0.372                | 80.96                     | 58.31                 |
| 51051              | Dickenson, VA             | 0.601                | 90.39                     | 68.06                 |
| 51053              | Dinwiddie, VA             | 0.224                | 72.05                     | 41.82                 |
| 51057              | Essex, VA                 | 0.071                | 60.84                     | 56.34                 |
| 51059              | Fairfax, VA               | -0.625               | 3.88                      | 18.76                 |
| 51061              | Fauquier, VA              | -0.619               | 4.23                      | 2.87                  |
| 51063              | Floyd, VA                 | -0.16                | 40.27                     | 11.15                 |

| <b>County FIPS</b> | <b>County Description</b> | <b>DOS-SVI Index</b> | <b>DOS-SVI Percentile</b> | <b>SVI Percentile</b> |
|--------------------|---------------------------|----------------------|---------------------------|-----------------------|
| 51065              | Fluvanna, VA              | -0.248               | 31.55                     | 6.31                  |
| 51067              | Franklin, VA              | 0.077                | 61.32                     | 40.1                  |
| 51069              | Frederick, VA             | -0.476               | 11.81                     | 18.22                 |
| 51071              | Giles, VA                 | -0.071               | 48.23                     | 27.42                 |
| 51073              | Gloucester, VA            | -0.248               | 31.49                     | 3.66                  |
| 51075              | Goochland, VA             | -0.386               | 18.88                     | 4.59                  |
| 51077              | Grayson, VA               | 0.496                | 86.5                      | 64.59                 |
| 51079              | Greene, VA                | -0.296               | 27.38                     | 16.31                 |
| 51081              | Greensville, VA           | 0.725                | 94.05                     | 81.4                  |
| 51083              | Halifax, VA               | 0.173                | 68.55                     | 67.23                 |
| 51085              | Hanover, VA               | -0.588               | 5.51                      | 1.56                  |
| 51087              | Henrico, VA               | -0.32                | 24.9                      | 25.73                 |
| 51089              | Henry, VA                 | 0.573                | 89.56                     | 88.57                 |
| 51091              | Highland, VA              | -0.136               | 42.18                     | 6.5                   |
| 51093              | Isle of Wight, VA         | 0.05                 | 59.28                     | 33.92                 |
| 51095              | James City, VA            | -0.366               | 20.89                     | 11.5                  |
| 51097              | King and Queen, VA        | 0.185                | 69.44                     | 32.45                 |
| 51099              | King George, VA           | -0.553               | 7.35                      | 1.59                  |
| 51101              | King William, VA          | -0.469               | 12.32                     | 3.57                  |
| 51103              | Lancaster, VA             | -0.08                | 47.34                     | 15.83                 |
| 51105              | Lee, VA                   | 0.874                | 96.21                     | 80.73                 |
| 51107              | Loudoun, VA               | -0.858               | 0.96                      | 9.04                  |
| 51109              | Louisa, VA                | 0.049                | 59.25                     | 33.25                 |
| 51111              | Lunenburg, VA             | 0.462                | 85.07                     | 86.43                 |
| 51113              | Madison, VA               | -0.291               | 27.83                     | 16.4                  |
| 51115              | Mathews, VA               | -0.114               | 44.28                     | 2.07                  |
| 51117              | Mecklenburg, VA           | 0.365                | 80.42                     | 77.68                 |
| 51119              | Middlesex, VA             | -0.027               | 51.93                     | 20.25                 |
| 51121              | Montgomery, VA            | 0.106                | 63.67                     | 29.59                 |
| 51125              | Nelson, VA                | -0.148               | 41.13                     | 30                    |
| 51127              | New Kent, VA              | -0.435               | 14.71                     | 0.61                  |
| 51131              | Northampton, VA           | -0.039               | 50.94                     | 67.64                 |
| 51133              | Northumberland, VA        | 0.192                | 69.98                     | 12.13                 |
| 51135              | Nottoway, VA              | 0.233                | 72.65                     | 90.96                 |
| 51137              | Orange, VA                | -0.183               | 37.92                     | 46.5                  |
| 51139              | Page, VA                  | 0.219                | 71.73                     | 39.36                 |
| 51141              | Patrick, VA               | 0.414                | 82.87                     | 63.89                 |
| 51143              | Pittsylvania, VA          | 0.328                | 78.29                     | 64.27                 |
| 51145              | Powhatan, VA              | -0.408               | 16.81                     | 0.57                  |
| 51147              | Prince Edward, VA         | 0.488                | 86.25                     | 72.96                 |
| 51149              | Prince George, VA         | 0.051                | 59.44                     | 31.75                 |
| 51153              | Prince William, VA        | -0.561               | 6.65                      | 30.22                 |
| 51155              | Pulaski, VA               | 0.186                | 69.56                     | 48.31                 |
| 51157              | Rappahannock, VA          | -0.271               | 29.55                     | 2.13                  |
| 51159              | Richmond, VA              | 0.018                | 56.22                     | 61.43                 |
| 51161              | Roanoke, VA               | -0.412               | 16.46                     | 13.12                 |
| 51163              | Rockbridge, VA            | 0.078                | 61.41                     | 14.33                 |
| 51165              | Rockingham, VA            | -0.343               | 22.89                     | 31.97                 |
| 51167              | Russell, VA               | 0.619                | 90.93                     | 44.87                 |
| 51169              | Scott, VA                 | 0.462                | 85.13                     | 67.58                 |
| 51171              | Shenandoah, VA            | -0.227               | 33.81                     | 36.43                 |
| 51173              | Smyth, VA                 | 0.34                 | 78.92                     | 75.48                 |
| 51175              | Southampton, VA           | 0.036                | 58.1                      | 47.55                 |
| 51177              | Spotsylvania, VA          | -0.402               | 17.29                     | 21.59                 |
| 51179              | Stafford, VA              | -0.619               | 4.2                       | 15.41                 |

| <b>County FIPS</b> | <b>County Description</b>    | <b>DOS-SVI Index</b> | <b>DOS-SVI Percentile</b> | <b>SVI Percentile</b> |
|--------------------|------------------------------|----------------------|---------------------------|-----------------------|
| 51181              | Surry, VA                    | 0.264                | 74.69                     | 36.59                 |
| 51183              | Sussex, VA                   | 0.952                | 96.97                     | 90.92                 |
| 51185              | Tazewell, VA                 | 0.477                | 85.86                     | 59.36                 |
| 51187              | Warren, VA                   | -0.233               | 33.21                     | 25.64                 |
| 51191              | Washington, VA               | 0.272                | 75.2                      | 36.46                 |
| 51193              | Westmoreland, VA             | 0.146                | 66.38                     | 29.2                  |
| 51195              | Wise, VA                     | 0.816                | 95.64                     | 85.99                 |
| 51197              | Wythe, VA                    | 0.214                | 71.31                     | 39.65                 |
| 51199              | York, VA                     | -0.39                | 18.4                      | 19.97                 |
| 51510              | Alexandria City, VA          | -0.518               | 9.3                       | 20.03                 |
| 51520              | Bristol City, VA             | 0.225                | 72.14                     | 75.1                  |
| 51530              | Buena Vista City, VA         | 0.031                | 57.31                     | 32.42                 |
| 51540              | Charlottesville City,<br>VA  | -0.141               | 41.83                     | 40.92                 |
| 51550              | Chesapeake City, VA          | -0.357               | 21.43                     | 25.92                 |
| 51570              | Colonial Heights City,<br>VA | 0.031                | 57.37                     | 56.85                 |
| 51580              | Covington City, VA           | -0.109               | 44.73                     | 46.34                 |
| 51590              | Danville City, VA            | 0.343                | 79.15                     | 95.89                 |
| 51595              | Emporia City, VA             | 1.148                | 98.66                     | 95.67                 |
| 51600              | Fairfax City, VA             | -0.581               | 5.92                      | 24.11                 |
| 51610              | Falls Church City, VA        | -0.93                | 0.57                      | 13.89                 |
| 51620              | Franklin City, VA            | 0.571                | 89.49                     | 71.75                 |
| 51630              | Fredericksburg City,<br>VA   | -0.162               | 40.15                     | 56.31                 |
| 51640              | Galax City, VA               | 0.429                | 83.44                     | 98.38                 |
| 51650              | Hampton City, VA             | 0.053                | 59.57                     | 66.75                 |
| 51660              | Harrisonburg City, VA        | 0.083                | 62.02                     | 79.3                  |
| 51670              | Hopewell City, VA            | 0.17                 | 68.39                     | 94.08                 |
| 51678              | Lexington City, VA           | 0.44                 | 84.11                     | 32.26                 |
| 51680              | Lynchburg City, VA           | 0.067                | 60.55                     | 73.69                 |
| 51683              | Manassas City, VA            | -0.395               | 18.02                     | 44.46                 |
| 51685              | Manassas Park City,<br>VA    | -0.181               | 38.17                     | 52.8                  |
| 51690              | Martinsville City, VA        | 0.302                | 77.08                     | 91.05                 |
| 51700              | Newport News City,<br>VA     | -0.038               | 51.03                     | 81.56                 |
| 51710              | Norfolk City, VA             | 0.14                 | 66.06                     | 77.17                 |
| 51720              | Norton City, VA              | 0.835                | 95.96                     | 90.54                 |
| 51730              | Petersburg City, VA          | 0.607                | 90.54                     | 96.43                 |
| 51735              | Poquoson City, VA            | -0.469               | 12.29                     | 1.27                  |
| 51740              | Portsmouth City, VA          | 0.142                | 66.19                     | 80.06                 |
| 51750              | Radford City, VA             | 0.576                | 89.69                     | 41.24                 |
| 51760              | Richmond City, VA            | 0.215                | 71.44                     | 77.29                 |
| 51770              | Roanoke City, VA             | -0.02                | 52.56                     | 80.38                 |
| 51775              | Salem City, VA               | -0.209               | 35.44                     | 30.89                 |
| 51790              | Staunton City, VA            | -0.214               | 35.02                     | 44.49                 |
| 51800              | Suffolk City, VA             | -0.231               | 33.37                     | 34.68                 |
| 51810              | Virginia Beach City,<br>VA   | -0.365               | 20.92                     | 18.89                 |
| 51820              | Waynesboro City, VA          | -0.204               | 36.1                      | 60.13                 |
| 51830              | Williamsburg City, VA        | 0.349                | 79.5                      | 38.5                  |
| 51840              | Winchester City, VA          | -0.279               | 28.84                     | 72.2                  |
| 53001              | Adams, WA                    | -0.208               | 35.59                     | 96.21                 |
| 53003              | Asotin, WA                   | 0.108                | 63.74                     | 42.48                 |

| <b>County FIPS</b> | <b>County Description</b> | <b>DOS-SVI Index</b> | <b>DOS-SVI Percentile</b> | <b>SVI Percentile</b> |
|--------------------|---------------------------|----------------------|---------------------------|-----------------------|
| 53005              | Benton, WA                | -0.304               | 26.55                     | 51.4                  |
| 53007              | Chelan, WA                | -0.162               | 40.08                     | 67.8                  |
| 53009              | Clallam, WA               | 0.257                | 74.18                     | 61.46                 |
| 53011              | Clark, WA                 | -0.426               | 15.31                     | 28.57                 |
| 53013              | Columbia, WA              | -0.028               | 51.86                     | 31.46                 |
| 53015              | Cowlitz, WA               | 0.112                | 64.18                     | 78.85                 |
| 53017              | Douglas, WA               | -0.181               | 38.24                     | 77.07                 |
| 53019              | Ferry, WA                 | 0.493                | 86.41                     | 82.23                 |
| 53021              | Franklin, WA              | -0.417               | 15.98                     | 86.91                 |
| 53023              | Garfield, WA              | 0.094                | 62.94                     | 18.34                 |
| 53025              | Grant, WA                 | -0.095               | 46.26                     | 84.52                 |
| 53027              | Grays Harbor, WA          | 0.273                | 75.23                     | 83.92                 |
| 53029              | Island, WA                | -0.082               | 47.31                     | 18.57                 |
| 53031              | Jefferson, WA             | 0.235                | 72.81                     | 24.14                 |
| 53033              | King, WA                  | -0.524               | 8.88                      | 28.54                 |
| 53035              | Kitsap, WA                | -0.219               | 34.48                     | 28.25                 |
| 53037              | Kittitas, WA              | 0.112                | 64.31                     | 28.31                 |
| 53039              | Klickitat, WA             | 0.082                | 61.89                     | 57.23                 |
| 53041              | Lewis, WA                 | 0.28                 | 75.74                     | 78.89                 |
| 53043              | Lincoln, WA               | 0.049                | 59.22                     | 19.84                 |
| 53045              | Mason, WA                 | 0.327                | 78.22                     | 63.82                 |
| 53047              | Okanogan, WA              | 0.201                | 70.45                     | 92.55                 |
| 53049              | Pacific, WA               | 0.562                | 89.3                      | 73.6                  |
| 53051              | Pend Oreille, WA          | 0.085                | 62.24                     | 53.6                  |
| 53053              | Pierce, WA                | -0.254               | 30.98                     | 48.73                 |
| 53055              | San Juan, WA              | -0.359               | 21.27                     | 8.63                  |
| 53057              | Skagit, WA                | -0.241               | 32.44                     | 53.82                 |
| 53059              | Skamania, WA              | -0.122               | 43.62                     | 21.94                 |
| 53061              | Snohomish, WA             | -0.439               | 14.23                     | 27.55                 |
| 53063              | Spokane, WA               | -0.197               | 36.9                      | 48.25                 |
| 53065              | Stevens, WA               | 0.183                | 69.28                     | 46.15                 |
| 53067              | Thurston, WA              | -0.135               | 42.34                     | 32.99                 |
| 53069              | Wahkiakum, WA             | 0.234                | 72.72                     | 18.09                 |
| 53071              | Walla Walla, WA           | -0.102               | 45.34                     | 68.31                 |
| 53073              | Whatcom, WA               | -0.108               | 44.92                     | 45.41                 |
| 53075              | Whitman, WA               | 0.458                | 84.88                     | 51.08                 |
| 53077              | Yakima, WA                | -0.134               | 42.44                     | 92.77                 |
| 54001              | Barbour, WV               | 0.321                | 77.91                     | 65.13                 |
| 54003              | Berkeley, WV              | -0.092               | 46.51                     | 44.33                 |
| 54005              | Boone, WV                 | 0.794                | 95.29                     | 70.41                 |
| 54007              | Braxton, WV               | 0.809                | 95.51                     | 66.46                 |
| 54009              | Brooke, WV                | -0.264               | 30.18                     | 33.06                 |
| 54011              | Cabell, WV                | 0.095                | 62.97                     | 62.45                 |
| 54013              | Calhoun, WV               | 1.151                | 98.73                     | 52.39                 |
| 54015              | Clay, WV                  | 0.853                | 96.15                     | 68.85                 |
| 54017              | Doddridge, WV             | 0.347                | 79.43                     | 36.08                 |
| 54019              | Fayette, WV               | 0.434                | 83.6                      | 76.4                  |
| 54021              | Gilmer, WV                | 0.828                | 95.77                     | 75.64                 |
| 54023              | Grant, WV                 | 0.149                | 66.6                      | 36.75                 |
| 54025              | Greenbrier, WV            | 0.266                | 74.94                     | 55.57                 |
| 54027              | Hampshire, WV             | 0.364                | 80.33                     | 64.33                 |
| 54029              | Hancock, WV               | 0.033                | 57.62                     | 40.51                 |
| 54031              | Hardy, WV                 | -0.026               | 52.02                     | 28.5                  |
| 54033              | Harrison, WV              | 0.01                 | 55.68                     | 40.89                 |
| 54035              | Jackson, WV               | -0.047               | 50.14                     | 25.29                 |

| <b>County FIPS</b> | <b>County Description</b> | <b>DOS-SVI Index</b> | <b>DOS-SVI Percentile</b> | <b>SVI Percentile</b> |
|--------------------|---------------------------|----------------------|---------------------------|-----------------------|
| 54037              | Jefferson, WV             | -0.169               | 39.45                     | 22.55                 |
| 54039              | Kanawha, WV               | 0.039                | 58.58                     | 56.56                 |
| 54041              | Lewis, WV                 | 0.207                | 70.87                     | 67.61                 |
| 54043              | Lincoln, WV               | 0.535                | 88.28                     | 60.57                 |
| 54045              | Logan, WV                 | 0.938                | 96.78                     | 74.71                 |
| 54047              | McDowell, WV              | 1.151                | 98.76                     | 90.29                 |
| 54049              | Marion, WV                | 0.007                | 55.59                     | 49.39                 |
| 54051              | Marshall, WV              | -0.07                | 48.33                     | 21.53                 |
| 54053              | Mason, WV                 | 0.23                 | 72.43                     | 54.97                 |
| 54055              | Mercer, WV                | 0.418                | 83.09                     | 80.89                 |
| 54057              | Mineral, WV               | 0.111                | 64.12                     | 59.33                 |
| 54059              | Mingo, WV                 | 1.358                | 99.49                     | 78.5                  |
| 54061              | Monongalia, WV            | 0.068                | 60.59                     | 41.11                 |
| 54063              | Monroe, WV                | 0.525                | 87.87                     | 46.62                 |
| 54065              | Morgan, WV                | 0.154                | 66.95                     | 17.64                 |
| 54067              | Nicholas, WV              | 0.308                | 77.46                     | 54.11                 |
| 54069              | Ohio, WV                  | -0.228               | 33.65                     | 31.08                 |
| 54071              | Pendleton, WV             | 0.264                | 74.72                     | 35.8                  |
| 54073              | Pleasants, WV             | 0.392                | 81.73                     | 44.68                 |
| 54075              | Pocahontas, WV            | 0.34                 | 78.86                     | 49.71                 |
| 54077              | Preston, WV               | 0.341                | 78.99                     | 57.32                 |
| 54079              | Putnam, WV                | -0.38                | 19.52                     | 4.08                  |
| 54081              | Raleigh, WV               | 0.364                | 80.39                     | 76.85                 |
| 54083              | Randolph, WV              | 0.235                | 72.78                     | 58.06                 |
| 54085              | Ritchie, WV               | 0.395                | 82.01                     | 36.4                  |
| 54087              | Roane, WV                 | 0.655                | 92.17                     | 64.65                 |
| 54089              | Summers, WV               | 0.815                | 95.61                     | 82.9                  |
| 54091              | Taylor, WV                | 0.243                | 73.16                     | 49.49                 |
| 54093              | Tucker, WV                | 0.217                | 71.6                      | 36.72                 |
| 54095              | Tyler, WV                 | 0.185                | 69.37                     | 22.13                 |
| 54097              | Upshur, WV                | 0.29                 | 76.34                     | 69.11                 |
| 54099              | Wayne, WV                 | 0.523                | 87.84                     | 60.06                 |
| 54101              | Webster, WV               | 0.685                | 93.09                     | 74.87                 |
| 54103              | Wetzel, WV                | 0.296                | 76.76                     | 47.52                 |
| 54105              | Wirt, WV                  | 0.468                | 85.61                     | 37.48                 |
| 54107              | Wood, WV                  | -0.106               | 45.05                     | 37.23                 |
| 54109              | Wyoming, WV               | 1.082                | 98.12                     | 64.43                 |
| 55001              | Adams, WI                 | 0.557                | 89.05                     | 56.85                 |
| 55003              | Ashland, WI               | -0.074               | 47.88                     | 55                    |
| 55005              | Barron, WI                | -0.402               | 17.19                     | 32.71                 |
| 55007              | Bayfield, WI              | -0.101               | 45.65                     | 9.9                   |
| 55009              | Brown, WI                 | -0.544               | 7.93                      | 32.99                 |
| 55011              | Buffalo, WI               | -0.503               | 10.16                     | 5.76                  |
| 55013              | Burnett, WI               | -0.019               | 52.75                     | 16.72                 |
| 55015              | Calumet, WI               | -0.766               | 1.4                       | 1.82                  |
| 55017              | Chippewa, WI              | -0.458               | 13.05                     | 21.05                 |
| 55019              | Clark, WI                 | -0.676               | 2.55                      | 53.5                  |
| 55021              | Columbia, WI              | -0.528               | 8.66                      | 12.04                 |
| 55023              | Crawford, WI              | -0.208               | 35.72                     | 39.71                 |
| 55025              | Dane, WI                  | -0.553               | 7.26                      | 16.88                 |
| 55027              | Dodge, WI                 | -0.355               | 21.75                     | 20.19                 |
| 55029              | Door, WI                  | -0.242               | 32.25                     | 5.57                  |
| 55031              | Douglas, WI               | -0.292               | 27.73                     | 27.48                 |
| 55033              | Dunn, WI                  | -0.267               | 29.93                     | 18.47                 |
| 55035              | Eau Claire, WI            | -0.347               | 22.45                     | 21.75                 |



| <b>County FIPS</b> | <b>County Description</b> | <b>DOS-SVI Index</b> | <b>DOS-SVI Percentile</b> | <b>SVI Percentile</b> |
|--------------------|---------------------------|----------------------|---------------------------|-----------------------|
| 55037              | Florence, WI              | 0.042                | 58.84                     | 14.52                 |
| 55039              | Fond du Lac, WI           | -0.461               | 12.8                      | 20.38                 |
| 55041              | Forest, WI                | 0.151                | 66.67                     | 57.74                 |
| 55043              | Grant, WI                 | -0.352               | 22.16                     | 19.39                 |
| 55045              | Green, WI                 | -0.587               | 5.54                      | 5.29                  |
| 55047              | Green Lake, WI            | -0.481               | 11.3                      | 28.69                 |
| 55049              | Iowa, WI                  | -0.565               | 6.5                       | 1.31                  |
| 55051              | Iron, WI                  | 0.139                | 65.97                     | 36.02                 |
| 55053              | Jackson, WI               | -0.208               | 35.66                     | 50.03                 |
| 55055              | Jefferson, WI             | -0.435               | 14.64                     | 18.54                 |
| 55057              | Juneau, WI                | 0.013                | 55.97                     | 37.8                  |
| 55059              | Kenosha, WI               | -0.197               | 36.93                     | 51.11                 |
| 55061              | Kewaunee, WI              | -0.513               | 9.39                      | 5.86                  |
| 55063              | La Crosse, WI             | -0.332               | 23.75                     | 20.89                 |
| 55065              | Lafayette, WI             | -0.609               | 4.74                      | 15.96                 |
| 55067              | Langlade, WI              | 0.092                | 62.81                     | 35.35                 |
| 55069              | Lincoln, WI               | -0.296               | 27.41                     | 10.13                 |
| 55071              | Manitowoc, WI             | -0.444               | 13.75                     | 16.21                 |
| 55073              | Marathon, WI              | -0.541               | 8.05                      | 14.43                 |
| 55075              | Marinette, WI             | -0.019               | 52.69                     | 29.71                 |
| 55077              | Marquette, WI             | -0.041               | 50.75                     | 25.96                 |
| 55078              | Menominee, WI             | -0.221               | 34.29                     | 76.72                 |
| 55079              | Milwaukee, WI             | -0.182               | 37.98                     | 80.61                 |
| 55081              | Monroe, WI                | -0.443               | 13.88                     | 46.21                 |
| 55083              | Oconto, WI                | -0.261               | 30.34                     | 6.4                   |
| 55085              | Oneida, WI                | -0.29                | 27.95                     | 1.4                   |
| 55087              | Outagamie, WI             | -0.62                | 4.17                      | 9.78                  |
| 55089              | Ozaukee, WI               | -0.727               | 1.78                      | 1.34                  |
| 55091              | Pepin, WI                 | -0.446               | 13.59                     | 10.19                 |
| 55093              | Pierce, WI                | -0.494               | 10.47                     | 8.06                  |
| 55095              | Polk, WI                  | -0.311               | 25.95                     | 8.73                  |
| 55097              | Portage, WI               | -0.353               | 21.94                     | 16.53                 |
| 55099              | Price, WI                 | -0.239               | 32.63                     | 16.02                 |
| 55101              | Racine, WI                | -0.322               | 24.61                     | 45.51                 |
| 55103              | Richland, WI              | -0.379               | 19.64                     | 30.73                 |
| 55105              | Rock, WI                  | -0.257               | 30.69                     | 45.61                 |
| 55107              | Rusk, WI                  | -0.11                | 44.63                     | 34.65                 |
| 55109              | St. Croix, WI             | -0.831               | 1.02                      | 1.46                  |
| 55111              | Sauk, WI                  | -0.46                | 12.86                     | 23.44                 |
| 55113              | Sawyer, WI                | -0.08                | 47.47                     | 42.68                 |
| 55115              | Shawano, WI               | -0.426               | 15.35                     | 13.82                 |
| 55117              | Sheboygan, WI             | -0.545               | 7.86                      | 22.45                 |
| 55119              | Taylor, WI                | -0.436               | 14.61                     | 20                    |
| 55121              | Trempealeau, WI           | -0.59                | 5.48                      | 28.12                 |
| 55123              | Vernon, WI                | -0.596               | 5.13                      | 38.34                 |
| 55125              | Vilas, WI                 | 0.144                | 66.25                     | 13.95                 |
| 55127              | Walworth, WI              | -0.356               | 21.55                     | 26.88                 |
| 55129              | Washburn, WI              | -0.155               | 40.72                     | 10.8                  |
| 55131              | Washington, WI            | -0.659               | 2.9                       | 0.99                  |
| 55133              | Waukesha, WI              | -0.69                | 2.2                       | 1.94                  |
| 55135              | Waupaca, WI               | -0.363               | 21.11                     | 18.15                 |
| 55137              | Waushara, WI              | -0.095               | 46.23                     | 36.53                 |
| 55139              | Winnebago, WI             | -0.407               | 16.87                     | 16.08                 |
| 55141              | Wood, WI                  | -0.353               | 22.03                     | 15.35                 |
| 56001              | Albany, WY                | -0.05                | 49.95                     | 24.94                 |

| <b>County FIPS</b> | <b>County Description</b> | <b>DOS-SVI Index</b> | <b>DOS-SVI Percentile</b> | <b>SVI Percentile</b> |
|--------------------|---------------------------|----------------------|---------------------------|-----------------------|
| 56003              | Big Horn, WY              | -0.181               | 38.14                     | 39.55                 |
| 56005              | Campbell, WY              | -0.43                | 15.06                     | 33.15                 |
| 56007              | Carbon, WY                | -0.348               | 22.32                     | 50.29                 |
| 56009              | Converse, WY              | -0.215               | 34.99                     | 20.48                 |
| 56011              | Crook, WY                 | -0.48                | 11.49                     | 3.28                  |
| 56013              | Fremont, WY               | -0.158               | 40.5                      | 56.24                 |
| 56015              | Goshen, WY                | 0.095                | 63.01                     | 32.64                 |
| 56017              | Hot Springs, WY           | -0.209               | 35.47                     | 12.29                 |
| 56019              | Johnson, WY               | -0.368               | 20.82                     | 17.74                 |
| 56021              | Laramie, WY               | -0.275               | 29.26                     | 26.97                 |
| 56023              | Lincoln, WY               | -0.532               | 8.5                       | 8.09                  |
| 56025              | Natrona, WY               | -0.308               | 26.39                     | 29.52                 |
| 56027              | Niobrara, WY              | -0.056               | 49.57                     | 33.6                  |
| 56029              | Park, WY                  | -0.391               | 18.34                     | 6.59                  |
| 56031              | Platte, WY                | -0.185               | 37.85                     | 9.52                  |
| 56033              | Sheridan, WY              | -0.506               | 9.93                      | 8.95                  |
| 56035              | Sublette, WY              | -0.388               | 18.53                     | 2.93                  |
| 56037              | Sweetwater, WY            | -0.215               | 34.89                     | 37.01                 |
| 56039              | Teton, WY                 | -0.925               | 0.64                      | 11.27                 |
| 56041              | Uinta, WY                 | -0.15                | 41.01                     | 45.22                 |
| 56043              | Washakie, WY              | -0.116               | 44.19                     | 37.32                 |
| 56045              | Weston, WY                | -0.06                | 49.19                     | 34.75                 |

Appendix Table 8: STK DOS-SVI and CDC SVI Percentiles by County

| County FIPS | County Description | DOS-SVI Index | DOS-SVI Percentile | SVI Percentile |
|-------------|--------------------|---------------|--------------------|----------------|
| 01001       | Autauga, AL        | -0.008        | 51.45              | 43.54          |
| 01003       | Baldwin, AL        | -0.135        | 7.35               | 21.62          |
| 01005       | Barbour, AL        | 0.087         | 84.18              | 99.59          |
| 01007       | Bibb, AL           | 0.117         | 89.84              | 60.03          |
| 01009       | Blount, AL         | 0.015         | 61.7               | 42.42          |
| 01011       | Bullock, AL        | -0.162        | 3.85               | 88.98          |
| 01013       | Butler, AL         | -0.014        | 49.19              | 86.53          |
| 01015       | Calhoun, AL        | -0.03         | 42.34              | 82.52          |
| 01017       | Chambers, AL       | -0.036        | 39.89              | 73.82          |
| 01019       | Cherokee, AL       | 0.025         | 66.09              | 45.16          |
| 01021       | Chilton, AL        | 0.06          | 77.94              | 76.02          |
| 01023       | Choctaw, AL        | 0.013         | 61.25              | 87.48          |
| 01025       | Clarke, AL         | 0.109         | 88.7               | 84.71          |
| 01027       | Clay, AL           | -0.074        | 23.05              | 56.4           |
| 01029       | Cleburne, AL       | 0.052         | 75.84              | 54.17          |
| 01031       | Coffee, AL         | -0.043        | 37.06              | 54.08          |
| 01033       | Colbert, AL        | -0.093        | 16.3               | 42.74          |
| 01035       | Conecuh, AL        | -0.036        | 39.95              | 80.86          |
| 01037       | Coosa, AL          | -0.038        | 39.38              | 52.61          |
| 01039       | Covington, AL      | 0.027         | 66.98              | 77.23          |
| 01041       | Crenshaw, AL       | -0.034        | 41.04              | 68.73          |
| 01043       | Cullman, AL        | 0.041         | 72.78              | 51.82          |
| 01045       | Dale, AL           | 0.04          | 72.17              | 75.99          |
| 01047       | Dallas, AL         | 0.064         | 79.05              | 94.9           |
| 01049       | DeKalb, AL         | 0.014         | 61.6               | 80.22          |
| 01051       | Elmore, AL         | 0.003         | 56.54              | 54.01          |
| 01053       | Escambia, AL       | 0.111         | 89.17              | 85.57          |
| 01055       | Etowah, AL         | -0.064        | 27.64              | 65.64          |
| 01057       | Fayette, AL        | 0.013         | 61.29              | 70.38          |
| 01059       | Franklin, AL       | 0.005         | 57.62              | 84.17          |
| 01061       | Geneva, AL         | 0.033         | 70.01              | 79.55          |
| 01063       | Greene, AL         | 0.122         | 90.73              | 98.54          |
| 01065       | Hale, AL           | 0.137         | 92.14              | 95.99          |
| 01067       | Henry, AL          | -0.038        | 39.06              | 55.19          |
| 01069       | Houston, AL        | -0.078        | 21.9               | 68.38          |
| 01071       | Jackson, AL        | 0.03          | 68.64              | 57.26          |
| 01073       | Jefferson, AL      | -0.142        | 6.05               | 66.21          |
| 01075       | Lamar, AL          | 0.073         | 81.63              | 62.64          |
| 01077       | Lauderdale, AL     | -0.057        | 30.85              | 44.68          |
| 01079       | Lawrence, AL       | 0.004         | 56.8               | 49.52          |
| 01081       | Lee, AL            | -0.017        | 47.53              | 66.02          |
| 01083       | Limestone, AL      | 0.006         | 58.17              | 52.96          |
| 01085       | Lowndes, AL        | -0.008        | 51.83              | 91.88          |
| 01087       | Macon, AL          | 0.033         | 70.14              | 89.71          |
| 01089       | Madison, AL        | -0.113        | 11.72              | 30.76          |
| 01091       | Marengo, AL        | 0.02          | 63.93              | 76.21          |
| 01093       | Marion, AL         | 0.012         | 61.03              | 67.1           |
| 01095       | Marshall, AL       | -0.026        | 44.03              | 72.61          |
| 01097       | Mobile, AL         | -0.08         | 20.98              | 75.32          |
| 01099       | Monroe, AL         | 0.103         | 87.49              | 74.81          |
| 01101       | Montgomery, AL     | -0.139        | 6.65               | 84.27          |
| 01103       | Morgan, AL         | -0.047        | 34.96              | 68.95          |
| 01105       | Perry, AL          | 0.102         | 87.23              | 99.49          |
| 01107       | Pickens, AL        | 0.038         | 71.89              | 92.07          |

| County FIPS | County Description               | DOS-SVI Index | DOS-SVI Percentile | SVI Percentile |
|-------------|----------------------------------|---------------|--------------------|----------------|
| 01109       | Pike, AL                         | -0.005        | 53.01              | 90.16          |
| 01111       | Randolph, AL                     | 0.049         | 74.59              | 71.91          |
| 01113       | Russell, AL                      | 0.046         | 73.96              | 91.15          |
| 01115       | St. Clair, AL                    | 0.013         | 61.16              | 36.56          |
| 01117       | Shelby, AL                       | -0.073        | 23.78              | 11.69          |
| 01119       | Sumter, AL                       | 0.068         | 80.07              | 95.57          |
| 01121       | Talladega, AL                    | 0.006         | 58.23              | 87.36          |
| 01123       | Tallapoosa, AL                   | 0.044         | 73.64              | 88.63          |
| 01125       | Tuscaloosa, AL                   | -0.108        | 12.7               | 62.55          |
| 01127       | Walker, AL                       | 0.084         | 83.73              | 74.52          |
| 01129       | Washington, AL                   | 0.069         | 80.45              | 73.03          |
| 01131       | Wilcox, AL                       | 0.182         | 95.38              | 92.8           |
| 01133       | Winston, AL                      | 0.027         | 66.95              | 70.25          |
| 02013       | Aleutians East, AK               | 0.044         | 73.51              | 58.03          |
| 02016       | Aleutians West, AK               | 0.286         | 98.15              | 49.27          |
| 02020       | Anchorage, AK                    | 0.018         | 63.1               | 46.02          |
| 02050       | Bethel, AK                       | 1.874         | 99.94              | 97.48          |
| 02060       | Bristol Bay, AK                  | 0.184         | 95.58              | 35.25          |
| 02068       | Denali, AK                       | 0.288         | 98.28              | 10.1           |
| 02070       | Dillingham, AK                   | 1.136         | 99.81              | 86.82          |
| 02090       | Fairbanks North Star,<br>AK      | 0.175         | 94.84              | 34.46          |
| 02100       | Haines, AK                       | 0.234         | 97.52              | 20.7           |
| 02105       | Hoonah-Angoon, AK                | 0.268         | 97.96              | 41.78          |
| 02110       | Juneau City and<br>Borough, AK   | 0.089         | 84.53              | 29.87          |
| 02122       | Kenai Peninsula, AK              | 0.14          | 92.55              | 40.73          |
| 02130       | Ketchikan Gateway,<br>AK         | 0.036         | 70.87              | 55.48          |
| 02150       | Kodiak Island, AK                | 0.155         | 93.73              | 70.06          |
| 02158       | Kusilvak, AK                     | 2.783         | 100                | 93.34          |
| 02164       | Lake and Peninsula, AK           | 0.701         | 99.75              | 79.78          |
| 02170       | Matanuska-Susitna, AK            | 0.207         | 96.56              | 31.72          |
| 02180       | Nome, AK                         | 1.62          | 99.9               | 92.99          |
| 02185       | North Slope, AK                  | 1.598         | 99.87              | 73.44          |
| 02188       | Northwest Arctic, AK             | 1.9           | 99.97              | 93.54          |
| 02195       | Petersburg, AK                   | 0.045         | 73.86              | 66.5           |
| 02198       | Prince of Wales-Hyder,<br>AK     | 0.24          | 97.61              | 76.62          |
| 02220       | Sitka City and Borough,<br>AK    | 0.043         | 73.26              | 40.22          |
| 02230       | Skagway, AK                      | 0.217         | 96.91              | 16.85          |
| 02240       | Southeast Fairbanks,<br>AK       | 0.383         | 99.05              | 58.38          |
| 02261       | Valdez-Cordova, AK               | 0.087         | 84.24              | 27.04          |
| 02275       | Wrangell City and<br>Borough, AK | 0.016         | 62.34              | 56.18          |
| 02282       | Yakutat City and<br>Borough, AK  | 0.264         | 97.93              | 58.73          |
| 02290       | Yukon-Koyukuk, AK                | 1.058         | 99.78              | 88.12          |
| 04001       | Apache, AZ                       | 0.473         | 99.49              | 98.85          |
| 04003       | Cochise, AZ                      | -0.066        | 26.39              | 90.64          |
| 04005       | Coconino, AZ                     | 0.221         | 96.97              | 71.31          |
| 04007       | Gila, AZ                         | 0.019         | 63.29              | 89.9           |
| 04009       | Graham, AZ                       | 0.302         | 98.5               | 96.4           |

| <b>County FIPS</b> | <b>County Description</b> | <b>DOS-SVI Index</b> | <b>DOS-SVI Percentile</b> | <b>SVI Percentile</b> |
|--------------------|---------------------------|----------------------|---------------------------|-----------------------|
| 04011              | Greenlee, AZ              | 0.071                | 80.93                     | 61.88                 |
| 04012              | La Paz, AZ                | -0.013               | 49.92                     | 92.36                 |
| 04013              | Maricopa, AZ              | -0.08                | 20.76                     | 63.54                 |
| 04015              | Mohave, AZ                | -0.013               | 49.7                      | 86.24                 |
| 04017              | Navajo, AZ                | 0.348                | 98.79                     | 99.55                 |
| 04019              | Pima, AZ                  | -0.078               | 21.81                     | 88.28                 |
| 04021              | Pinal, AZ                 | 0.06                 | 77.97                     | 85.92                 |
| 04023              | Santa Cruz, AZ            | -0.2                 | 1.75                      | 93.18                 |
| 04025              | Yavapai, AZ               | -0.081               | 20.6                      | 52.1                  |
| 04027              | Yuma, AZ                  | -0.002               | 54.57                     | 98.95                 |
| 05001              | Arkansas, AR              | -0.021               | 45.97                     | 77.87                 |
| 05003              | Ashley, AR                | -0.002               | 54.7                      | 85.76                 |
| 05005              | Baxter, AR                | -0.085               | 18.78                     | 27.93                 |
| 05007              | Benton, AR                | -0.016               | 48.14                     | 27.07                 |
| 05009              | Boone, AR                 | 0.026                | 66.89                     | 43.79                 |
| 05011              | Bradley, AR               | 0.019                | 63.48                     | 98.03                 |
| 05013              | Calhoun, AR               | -0.006               | 52.5                      | 54.81                 |
| 05015              | Carroll, AR               | 0.107                | 88.28                     | 59.52                 |
| 05017              | Chicot, AR                | -0.006               | 52.63                     | 99.68                 |
| 05019              | Clark, AR                 | 0.023                | 65.33                     | 78.92                 |
| 05021              | Clay, AR                  | -0.046               | 35.34                     | 65.29                 |
| 05023              | Cleburne, AR              | -0.083               | 19.42                     | 20.83                 |
| 05025              | Cleveland, AR             | -0.001               | 55.4                      | 56.43                 |
| 05027              | Columbia, AR              | 0.101                | 86.95                     | 93.98                 |
| 05029              | Conway, AR                | 0.022                | 64.98                     | 75.89                 |
| 05031              | Craighead, AR             | -0.019               | 47.05                     | 80.41                 |
| 05033              | Crawford, AR              | 0.033                | 69.95                     | 61.05                 |
| 05035              | Crittenden, AR            | 0.029                | 68.07                     | 93.41                 |
| 05037              | Cross, AR                 | -0.009               | 51.29                     | 70.13                 |
| 05039              | Dallas, AR                | 0.01                 | 60.11                     | 87.77                 |
| 05041              | Desha, AR                 | 0.023                | 65.46                     | 95.96                 |
| 05043              | Drew, AR                  | 0.036                | 71                        | 80.1                  |
| 05045              | Faulkner, AR              | 0.023                | 65.74                     | 47.74                 |
| 05047              | Franklin, AR              | 0.099                | 86.6                      | 59.43                 |
| 05049              | Fulton, AR                | 0.081                | 83.35                     | 66.88                 |
| 05051              | Garland, AR               | -0.084               | 19.04                     | 82.8                  |
| 05053              | Grant, AR                 | 0.036                | 71.16                     | 35.41                 |
| 05055              | Greene, AR                | 0.059                | 77.59                     | 58.34                 |
| 05057              | Hempstead, AR             | -0.061               | 28.91                     | 94.68                 |
| 05059              | Hot Spring, AR            | 0.12                 | 90.45                     | 81.88                 |
| 05061              | Howard, AR                | -0.04                | 38.11                     | 90.45                 |
| 05063              | Independence, AR          | 0.016                | 62.46                     | 75.25                 |
| 05065              | Izard, AR                 | 0.096                | 85.93                     | 56.97                 |
| 05067              | Jackson, AR               | 0.14                 | 92.36                     | 76.5                  |
| 05069              | Jefferson, AR             | 0.03                 | 68.45                     | 94.36                 |
| 05071              | Johnson, AR               | 0.041                | 72.62                     | 87.68                 |
| 05073              | Lafayette, AR             | -0.045               | 36.07                     | 78.98                 |
| 05075              | Lawrence, AR              | 0.035                | 70.49                     | 64.71                 |
| 05077              | Lee, AR                   | 0.206                | 96.5                      | 96.56                 |
| 05079              | Lincoln, AR               | 0.418                | 99.27                     | 81.34                 |
| 05081              | Little River, AR          | 0.022                | 65.14                     | 63.06                 |
| 05083              | Logan, AR                 | 0.031                | 69.15                     | 80.45                 |
| 05085              | Lonoke, AR                | 0.032                | 69.5                      | 33.09                 |
| 05087              | Madison, AR               | 0.088                | 84.4                      | 65.35                 |
| 05089              | Marion, AR                | 0.011                | 60.36                     | 51.75                 |

| <b>County FIPS</b> | <b>County Description</b> | <b>DOS-SVI Index</b> | <b>DOS-SVI Percentile</b> | <b>SVI Percentile</b> |
|--------------------|---------------------------|----------------------|---------------------------|-----------------------|
| 05091              | Miller, AR                | 0.037                | 71.41                     | 91.24                 |
| 05093              | Mississippi, AR           | 0.081                | 83.16                     | 95.54                 |
| 05095              | Monroe, AR                | -0.103               | 13.98                     | 85.16                 |
| 05097              | Montgomery, AR            | 0                    | 55.43                     | 70                    |
| 05099              | Nevada, AR                | 0.109                | 88.6                      | 88.41                 |
| 05101              | Newton, AR                | -0.015               | 48.74                     | 28.15                 |
| 05103              | Ouachita, AR              | 0.008                | 58.96                     | 86.56                 |
| 05105              | Perry, AR                 | 0.182                | 95.45                     | 63.6                  |
| 05107              | Phillips, AR              | -0.055               | 31.61                     | 92.39                 |
| 05109              | Pike, AR                  | 0.012                | 60.74                     | 71.24                 |
| 05111              | Poinsett, AR              | 0.106                | 88.03                     | 82.68                 |
| 05113              | Polk, AR                  | 0.139                | 92.33                     | 89.49                 |
| 05115              | Pope, AR                  | 0.021                | 64.41                     | 79.36                 |
| 05117              | Prairie, AR               | 0.069                | 80.33                     | 65.48                 |
| 05119              | Pulaski, AR               | -0.168               | 3.41                      | 62.87                 |
| 05121              | Randolph, AR              | 0.006                | 58.45                     | 71.66                 |
| 05123              | St. Francis, AR           | 0.133                | 91.69                     | 96.91                 |
| 05125              | Saline, AR                | -0.032               | 41.87                     | 33.25                 |
| 05127              | Scott, AR                 | 0.184                | 95.61                     | 88.73                 |
| 05129              | Searcy, AR                | -0.021               | 46.07                     | 43.76                 |
| 05131              | Sebastian, AR             | -0.061               | 29.23                     | 83.28                 |
| 05133              | Sevier, AR                | 0.163                | 94.21                     | 76.75                 |
| 05135              | Sharp, AR                 | -0.011               | 50.24                     | 61.91                 |
| 05137              | Stone, AR                 | -0.011               | 50.37                     | 51.02                 |
| 05139              | Union, AR                 | 0.099                | 86.72                     | 80.54                 |
| 05141              | Van Buren, AR             | 0.004                | 56.89                     | 72.26                 |
| 05143              | Washington, AR            | -0.041               | 37.79                     | 67.45                 |
| 05145              | White, AR                 | 0.041                | 72.49                     | 74.46                 |
| 05147              | Woodruff, AR              | -0.046               | 35.18                     | 84.9                  |
| 05149              | Yell, AR                  | 0.046                | 74.18                     | 87.83                 |
| 06001              | Alameda, CA               | -0.057               | 30.66                     | 47.01                 |
| 06003              | Alpine, CA                | -0.076               | 22.25                     | 72.87                 |
| 06005              | Amador, CA                | 0.012                | 60.84                     | 53.34                 |
| 06007              | Butte, CA                 | 0.011                | 60.62                     | 80.64                 |
| 06009              | Calaveras, CA             | -0.135               | 7.23                      | 23.5                  |
| 06011              | Colusa, CA                | -0.151               | 4.97                      | 74.36                 |
| 06013              | Contra Costa, CA          | -0.119               | 10.12                     | 40.57                 |
| 06015              | Del Norte, CA             | 0.2                  | 96.34                     | 97.13                 |
| 06017              | El Dorado, CA             | -0.062               | 28.37                     | 18.38                 |
| 06019              | Fresno, CA                | 0.05                 | 75.1                      | 96.11                 |
| 06021              | Glenn, CA                 | -0.088               | 17.8                      | 88.95                 |
| 06023              | Humboldt, CA              | 0.039                | 71.92                     | 76.05                 |
| 06025              | Imperial, CA              | 0.083                | 83.6                      | 99.78                 |
| 06027              | Inyo, CA                  | -0.056               | 31.07                     | 57.01                 |
| 06029              | Kern, CA                  | 0.142                | 92.77                     | 96.59                 |
| 06031              | Kings, CA                 | 0.086                | 84.05                     | 97.07                 |
| 06033              | Lake, CA                  | -0.002               | 54.85                     | 91.78                 |
| 06035              | Lassen, CA                | 0.191                | 95.92                     | 59.97                 |
| 06037              | Los Angeles, CA           | -0.037               | 39.67                     | 76.82                 |
| 06039              | Madera, CA                | 0.084                | 83.8                      | 95.41                 |
| 06041              | Marin, CA                 | -0.15                | 5.13                      | 27.01                 |
| 06043              | Mariposa, CA              | -0.018               | 47.37                     | 52.93                 |
| 06045              | Mendocino, CA             | 0.01                 | 60.2                      | 88.18                 |
| 06047              | Merced, CA                | 0.097                | 86.22                     | 97.17                 |
| 06049              | Modoc, CA                 | 0.009                | 59.53                     | 75.16                 |

| <b>County FIPS</b> | <b>County Description</b> | <b>DOS-SVI Index</b> | <b>DOS-SVI Percentile</b> | <b>SVI Percentile</b> |
|--------------------|---------------------------|----------------------|---------------------------|-----------------------|
| 06051              | Mono, CA                  | -0.189               | 2.1                       | 14.08                 |
| 06053              | Monterey, CA              | 0.081                | 83.41                     | 79.9                  |
| 06055              | Napa, CA                  | -0.062               | 28.59                     | 50.51                 |
| 06057              | Nevada, CA                | -0.111               | 12.13                     | 20.45                 |
| 06059              | Orange, CA                | -0.052               | 33.02                     | 41.91                 |
| 06061              | Placer, CA                | -0.091               | 17                        | 15.19                 |
| 06063              | Plumas, CA                | -0.107               | 13.05                     | 26.53                 |
| 06065              | Riverside, CA             | 0.023                | 65.49                     | 79.39                 |
| 06067              | Sacramento, CA            | -0.079               | 21.46                     | 73.38                 |
| 06069              | San Benito, CA            | 0.024                | 65.84                     | 52.45                 |
| 06071              | San Bernardino, CA        | 0.091                | 85                        | 90.1                  |
| 06073              | San Diego, CA             | -0.068               | 25.53                     | 55.96                 |
| 06075              | San Francisco, CA         | -0.083               | 19.68                     | 39.11                 |
| 06077              | San Joaquin, CA           | 0.018                | 63.2                      | 88.92                 |
| 06079              | San Luis Obispo, CA       | -0.061               | 29                        | 37.39                 |
| 06081              | San Mateo, CA             | -0.087               | 18.27                     | 26.5                  |
| 06083              | Santa Barbara, CA         | 0.065                | 79.47                     | 71.11                 |
| 06085              | Santa Clara, CA           | -0.076               | 22.51                     | 35.57                 |
| 06087              | Santa Cruz, CA            | 0.032                | 69.69                     | 54.3                  |
| 06089              | Shasta, CA                | 0.018                | 62.88                     | 70.22                 |
| 06091              | Sierra, CA                | -0.166               | 3.47                      | 4.52                  |
| 06093              | Siskiyou, CA              | -0.004               | 53.49                     | 72.23                 |
| 06095              | Solano, CA                | -0.064               | 27.67                     | 59.11                 |
| 06097              | Sonoma, CA                | -0.072               | 23.91                     | 40.35                 |
| 06099              | Stanislaus, CA            | 0.019                | 63.87                     | 86.75                 |
| 06101              | Sutter, CA                | -0.039               | 38.81                     | 88.22                 |
| 06103              | Tehama, CA                | 0.108                | 88.38                     | 96.24                 |
| 06105              | Trinity, CA               | -0.03                | 42.66                     | 74.11                 |
| 06107              | Tulare, CA                | 0.063                | 78.8                      | 94.17                 |
| 06109              | Tuolumne, CA              | 0.004                | 57.21                     | 46.88                 |
| 06111              | Ventura, CA               | -0.066               | 26.46                     | 48.28                 |
| 06113              | Yolo, CA                  | -0.019               | 46.9                      | 67.68                 |
| 06115              | Yuba, CA                  | 0.147                | 93.25                     | 94.2                  |
| 08001              | Adams, CO                 | -0.066               | 26.3                      | 58.92                 |
| 08003              | Alamosa, CO               | 0.112                | 89.33                     | 94.52                 |
| 08005              | Arapahoe, CO              | -0.183               | 2.45                      | 26.62                 |
| 08007              | Archuleta, CO             | -0.009               | 50.94                     | 25.7                  |
| 08009              | Baca, CO                  | -0.104               | 13.75                     | 60.86                 |
| 08011              | Bent, CO                  | 0.213                | 96.72                     | 89.81                 |
| 08013              | Boulder, CO               | -0.127               | 8.79                      | 17.04                 |
| 08014              | Broomfield, CO            | -0.15                | 5.09                      | 4.9                   |
| 08015              | Chaffee, CO               | -0.089               | 17.48                     | 23.89                 |
| 08017              | Cheyenne, CO              | 0.143                | 92.96                     | 25.89                 |
| 08019              | Clear Creek, CO           | -0.147               | 5.57                      | 1.97                  |
| 08021              | Conejos, CO               | 0.102                | 87.27                     | 93.25                 |
| 08023              | Costilla, CO              | -0.173               | 2.93                      | 93.79                 |
| 08025              | Crowley, CO               | 0.213                | 96.69                     | 89.3                  |
| 08027              | Custer, CO                | -0.115               | 11.24                     | 24.33                 |
| 08029              | Delta, CO                 | 0.04                 | 72.21                     | 68.66                 |
| 08031              | Denver, CO                | -0.261               | 0.57                      | 41.97                 |
| 08033              | Dolores, CO               | -0.112               | 12.03                     | 15.16                 |
| 08035              | Douglas, CO               | -0.079               | 21.39                     | 1.5                   |
| 08037              | Eagle, CO                 | -0.181               | 2.67                      | 13.69                 |
| 08039              | Elbert, CO                | -0.01                | 50.52                     | 0                     |
| 08041              | El Paso, CO               | -0.029               | 42.98                     | 39.27                 |

| County FIPS | County Description          | DOS-SVI Index | DOS-SVI Percentile | SVI Percentile |
|-------------|-----------------------------|---------------|--------------------|----------------|
| 08043       | Fremont, CO                 | 0.09          | 84.72              | 65.25          |
| 08045       | Garfield, CO                | 0.078         | 82.71              | 35.1           |
| 08047       | Gilpin, CO                  | -0.064        | 27.79              | 0.22           |
| 08049       | Grand, CO                   | -0.102        | 14.17              | 9.87           |
| 08051       | Gunnison, CO                | -0.016        | 48.3               | 13.92          |
| 08053       | Hinsdale, CO                | -0.078        | 21.68              | 6.24           |
| 08055       | Huerfano, CO                | -0.11         | 12.22              | 59.55          |
| 08057       | Jackson, CO                 | -0.087        | 18.02              | 11.37          |
| 08059       | Jefferson, CO               | -0.162        | 3.79               | 6.27           |
| 08061       | Kiowa, CO                   | -0.017        | 47.5               | 31.88          |
| 08063       | Kit Carson, CO              | -0.073        | 23.85              | 51.53          |
| 08065       | Lake, CO                    | -0.089        | 17.61              | 44.52          |
| 08067       | La Plata, CO                | -0.014        | 49.44              | 10.86          |
| 08069       | Larimer, CO                 | -0.083        | 19.64              | 11.94          |
| 08071       | Las Animas, CO              | -0.035        | 40.53              | 83.73          |
| 08073       | Lincoln, CO                 | 0.216         | 96.85              | 48.57          |
| 08075       | Logan, CO                   | 0.015         | 61.76              | 62.8           |
| 08077       | Mesa, CO                    | -0.017        | 47.76              | 57.55          |
| 08079       | Mineral, CO                 | -0.28         | 0.38               | 2.61           |
| 08081       | Moffat, CO                  | -0.028        | 43.17              | 54.71          |
| 08083       | Montezuma, CO               | 0             | 55.56              | 49.46          |
| 08085       | Montrose, CO                | -0.005        | 53.1               | 71.53          |
| 08087       | Morgan, CO                  | -0.099        | 15.03              | 74.14          |
| 08089       | Otero, CO                   | -0.118        | 10.31              | 95.61          |
| 08091       | Ouray, CO                   | -0.137        | 6.97               | 2.39           |
| 08093       | Park, CO                    | -0.036        | 40.37              | 0.06           |
| 08095       | Phillips, CO                | 0.04          | 72.36              | 29.55          |
| 08097       | Pitkin, CO                  | -0.271        | 0.48               | 6.56           |
| 08099       | Prowers, CO                 | 0.015         | 61.86              | 93.92          |
| 08101       | Pueblo, CO                  | -0.059        | 29.77              | 86.69          |
| 08103       | Rio Blanco, CO              | 0.105         | 87.87              | 34.01          |
| 08105       | Rio Grande, CO              | 0.086         | 84.08              | 95.86          |
| 08107       | Routt, CO                   | -0.11         | 12.38              | 6.34           |
| 08109       | Saguache, CO                | 0.14          | 92.52              | 80.7           |
| 08111       | San Juan, CO                | -0.169        | 3.28               | 12.83          |
| 08113       | San Miguel, CO              | -0.177        | 2.8                | 3.31           |
| 08115       | Sedgwick, CO                | -0.014        | 48.93              | 69.36          |
| 08117       | Summit, CO                  | -0.148        | 5.35               | 7.07           |
| 08119       | Teller, CO                  | -0.063        | 27.89              | 7.29           |
| 08121       | Washington, CO              | 0.021         | 64.44              | 28.22          |
| 08123       | Weld, CO                    | -0.011        | 50.33              | 39.94          |
| 08125       | Yuma, CO                    | -0.004        | 53.74              | 56.37          |
| 09001       | Fairfield, CT               | -0.152        | 4.81               | 44.97          |
| 09003       | Hartford, CT                | -0.159        | 4.01               | 51.5           |
| 09005       | Litchfield, CT              | -0.116        | 10.89              | 8.18           |
| 09007       | Middlesex, CT               | -0.138        | 6.75               | 11.82          |
| 09009       | New Haven, CT               | -0.114        | 11.33              | 52.23          |
| 09011       | New London, CT              | -0.132        | 7.8                | 35.61          |
| 09013       | Tolland, CT                 | -0.037        | 39.48              | 6.94           |
| 09015       | Windham, CT                 | -0.063        | 28.18              | 42.32          |
| 10001       | Kent, DE                    | -0.071        | 24.74              | 72.68          |
| 10003       | New Castle, DE              | -0.148        | 5.41               | 37.61          |
| 10005       | Sussex, DE                  | -0.15         | 5.03               | 40.19          |
| 11001       | District of Columbia,<br>DC | -0.024        | 44.67              | 59.65          |



| <b>County FIPS</b> | <b>County Description</b> | <b>DOS-SVI Index</b> | <b>DOS-SVI Percentile</b> | <b>SVI Percentile</b> |
|--------------------|---------------------------|----------------------|---------------------------|-----------------------|
| 12001              | Alachua, FL               | -0.091               | 16.94                     | 47.29                 |
| 12003              | Baker, FL                 | 0.157                | 93.82                     | 68.03                 |
| 12005              | Bay, FL                   | -0.114               | 11.46                     | 60.76                 |
| 12007              | Bradford, FL              | 0.12                 | 90.35                     | 92.64                 |
| 12009              | Brevard, FL               | -0.173               | 3.02                      | 37.13                 |
| 12011              | Broward, FL               | -0.308               | 0.22                      | 58.44                 |
| 12013              | Calhoun, FL               | 0.231                | 97.42                     | 84.01                 |
| 12015              | Charlotte, FL             | -0.243               | 0.73                      | 48.89                 |
| 12017              | Citrus, FL                | -0.112               | 11.91                     | 60.22                 |
| 12019              | Clay, FL                  | -0.038               | 39.13                     | 38.03                 |
| 12021              | Collier, FL               | -0.394               | 0.06                      | 46.18                 |
| 12023              | Columbia, FL              | 0.173                | 94.75                     | 85.96                 |
| 12027              | DeSoto, FL                | 0.003                | 56.41                     | 96.18                 |
| 12029              | Dixie, FL                 | 0.247                | 97.71                     | 89.94                 |
| 12031              | Duval, FL                 | -0.136               | 7                         | 69.2                  |
| 12033              | Escambia, FL              | -0.046               | 35.44                     | 48.63                 |
| 12035              | Flagler, FL               | -0.23                | 0.92                      | 27.99                 |
| 12037              | Franklin, FL              | 0.114                | 89.49                     | 80.83                 |
| 12039              | Gadsden, FL               | 0.062                | 78.54                     | 99.01                 |
| 12041              | Gilchrist, FL             | 0.089                | 84.62                     | 75.67                 |
| 12043              | Glades, FL                | 0.041                | 72.53                     | 90.48                 |
| 12045              | Gulf, FL                  | 0.042                | 72.97                     | 59.2                  |
| 12047              | Hamilton, FL              | 0.303                | 98.53                     | 99.08                 |
| 12049              | Hardee, FL                | 0.195                | 96.21                     | 98.31                 |
| 12051              | Hendry, FL                | 0.025                | 66.41                     | 99.39                 |
| 12053              | Hernando, FL              | -0.118               | 10.22                     | 54.9                  |
| 12055              | Highlands, FL             | -0.072               | 24.23                     | 87.29                 |
| 12057              | Hillsborough, FL          | -0.168               | 3.44                      | 67.01                 |
| 12059              | Holmes, FL                | 0.151                | 93.54                     | 93.47                 |
| 12061              | Indian River, FL          | -0.233               | 0.89                      | 39.62                 |
| 12063              | Jackson, FL               | 0.199                | 96.28                     | 95.83                 |
| 12065              | Jefferson, FL             | 0.053                | 75.9                      | 57.48                 |
| 12067              | Lafayette, FL             | 0.408                | 99.2                      | 98.06                 |
| 12069              | Lake, FL                  | -0.102               | 14.07                     | 60.29                 |
| 12071              | Lee, FL                   | -0.276               | 0.41                      | 55.25                 |
| 12073              | Leon, FL                  | -0.099               | 15.12                     | 49.43                 |
| 12075              | Levy, FL                  | 0.051                | 75.2                      | 77.93                 |
| 12077              | Liberty, FL               | 0.208                | 96.59                     | 83.34                 |
| 12079              | Madison, FL               | 0.192                | 96.02                     | 96.08                 |
| 12081              | Manatee, FL               | -0.188               | 2.17                      | 51.97                 |
| 12083              | Marion, FL                | -0.075               | 22.99                     | 75.35                 |
| 12085              | Martin, FL                | -0.23                | 0.96                      | 39.9                  |
| 12086              | Miami-Dade, FL            | -0.467               | 0.03                      | 81.75                 |
| 12087              | Monroe, FL                | -0.159               | 4.08                      | 45.57                 |
| 12089              | Nassau, FL                | -0.108               | 12.8                      | 24.59                 |
| 12091              | Okaloosa, FL              | -0.1                 | 14.64                     | 38.6                  |
| 12093              | Okeechobee, FL            | 0.073                | 81.6                      | 94.65                 |
| 12095              | Orange, FL                | -0.218               | 1.21                      | 66.91                 |
| 12097              | Osceola, FL               | -0.203               | 1.69                      | 81.78                 |
| 12099              | Palm Beach, FL            | -0.304               | 0.26                      | 55.92                 |
| 12101              | Pasco, FL                 | -0.079               | 21.08                     | 63.44                 |
| 12103              | Pinellas, FL              | -0.234               | 0.86                      | 51.69                 |
| 12105              | Polk, FL                  | -0.033               | 41.32                     | 90.35                 |
| 12107              | Putnam, FL                | 0.09                 | 84.75                     | 95.25                 |
| 12109              | St. Johns, FL             | -0.132               | 7.77                      | 7.61                  |

| County FIPS | County Description | DOS-SVI Index | DOS-SVI Percentile | SVI Percentile |
|-------------|--------------------|---------------|--------------------|----------------|
| 12111       | St. Lucie, FL      | -0.191        | 2.04               | 71.85          |
| 12113       | Santa Rosa, FL     | -0.014        | 49.03              | 30.96          |
| 12115       | Sarasota, FL       | -0.312        | 0.19               | 25.38          |
| 12117       | Seminole, FL       | -0.166        | 3.6                | 18.44          |
| 12119       | Sumter, FL         | -0.326        | 0.13               | 23.6           |
| 12121       | Suwannee, FL       | 0.104         | 87.55              | 94.24          |
| 12123       | Taylor, FL         | 0.242         | 97.64              | 89.84          |
| 12125       | Union, FL          | 0.365         | 98.89              | 83.82          |
| 12127       | Volusia, FL        | -0.195        | 1.94               | 53.47          |
| 12129       | Wakulla, FL        | 0.128         | 91.34              | 40.32          |
| 12131       | Walton, FL         | -0.079        | 21.2               | 58.22          |
| 12133       | Washington, FL     | 0.155         | 93.76              | 89.39          |
| 13001       | Appling, GA        | 0.079         | 82.9               | 96.69          |
| 13003       | Atkinson, GA       | 0.037         | 71.31              | 96.15          |
| 13005       | Bacon, GA          | 0.077         | 82.46              | 93.89          |
| 13007       | Baker, GA          | 0.051         | 75.39              | 74.24          |
| 13009       | Baldwin, GA        | 0.051         | 75.45              | 86.66          |
| 13011       | Banks, GA          | 0.059         | 77.56              | 55.86          |
| 13013       | Barrow, GA         | -0.04         | 38.17              | 42.04          |
| 13015       | Bartow, GA         | -0.01         | 50.56              | 59.14          |
| 13017       | Ben Hill, GA       | -0.014        | 48.97              | 87.26          |
| 13019       | Berrien, GA        | 0.134         | 91.88              | 85             |
| 13021       | Bibb, GA           | -0.067        | 26.27              | 91.75          |
| 13023       | Bleckley, GA       | 0.098         | 86.37              | 73.95          |
| 13025       | Brantley, GA       | 0.176         | 94.87              | 62.29          |
| 13027       | Brooks, GA         | 0.071         | 80.87              | 83.98          |
| 13029       | Bryan, GA          | -0.011        | 50.43              | 33.89          |
| 13031       | Bulloch, GA        | 0.05          | 75.14              | 81.21          |
| 13033       | Burke, GA          | 0.079         | 82.97              | 84.55          |
| 13035       | Butts, GA          | 0.085         | 83.92              | 76.53          |
| 13037       | Calhoun, GA        | 0.214         | 96.75              | 97.74          |
| 13039       | Camden, GA         | 0.022         | 64.82              | 51.59          |
| 13043       | Candler, GA        | 0.108         | 88.44              | 98.28          |
| 13045       | Carroll, GA        | -0.007        | 52.05              | 78.25          |
| 13047       | Catoosa, GA        | -0.008        | 51.42              | 13.18          |
| 13049       | Charlton, GA       | 0.111         | 89.21              | 87.52          |
| 13051       | Chatham, GA        | -0.112        | 12.07              | 69.49          |
| 13053       | Chattahoochee, GA  | 0.416         | 99.24              | 63.79          |
| 13055       | Chattooga, GA      | 0.277         | 98.12              | 92.52          |
| 13057       | Cherokee, GA       | -0.063        | 27.95              | 11.85          |
| 13059       | Clarke, GA         | -0.07         | 24.96              | 76.75          |
| 13061       | Clay, GA           | 0.095         | 85.83              | 93.09          |
| 13063       | Clayton, GA        | -0.151        | 4.87               | 91.02          |
| 13065       | Clinch, GA         | 0.169         | 94.46              | 97.77          |
| 13067       | Cobb, GA           | -0.196        | 1.91               | 26.69          |
| 13069       | Coffee, GA         | 0.093         | 85.32              | 95.06          |
| 13071       | Colquitt, GA       | 0.013         | 61.13              | 98.12          |
| 13073       | Columbia, GA       | -0.075        | 22.73              | 13.34          |
| 13075       | Cook, GA           | 0.069         | 80.52              | 85.1           |
| 13077       | Coweta, GA         | -0.084        | 19.01              | 24.27          |
| 13079       | Crawford, GA       | 0.139         | 92.23              | 68.15          |
| 13081       | Crisp, GA          | 0.076         | 82.08              | 98.57          |
| 13083       | Dade, GA           | 0.127         | 91.21              | 51.56          |
| 13085       | Dawson, GA         | -0.022        | 45.49              | 10.38          |
| 13087       | Decatur, GA        | 0.153         | 93.6               | 94.55          |

| County FIPS | County Description | DOS-SVI Index | DOS-SVI Percentile | SVI Percentile |
|-------------|--------------------|---------------|--------------------|----------------|
| 13089       | DeKalb, GA         | -0.228        | 1.05               | 66.11          |
| 13091       | Dodge, GA          | 0.098         | 86.53              | 92.23          |
| 13093       | Dooly, GA          | 0.071         | 81.06              | 94.84          |
| 13095       | Dougherty, GA      | -0.018        | 47.34              | 95.13          |
| 13097       | Douglas, GA        | -0.131        | 8.15               | 54.04          |
| 13099       | Early, GA          | 0.122         | 90.8               | 92.01          |
| 13101       | Echols, GA         | 0.027         | 67.27              | 66.15          |
| 13103       | Effingham, GA      | 0.03          | 68.61              | 23.63          |
| 13105       | Elbert, GA         | -0.003        | 54.22              | 83.38          |
| 13107       | Emanuel, GA        | 0.043         | 73.32              | 97.68          |
| 13109       | Evans, GA          | 0.03          | 68.39              | 98.47          |
| 13111       | Fannin, GA         | -0.084        | 19.26              | 30.03          |
| 13113       | Fayette, GA        | -0.131        | 7.99               | 6.08           |
| 13115       | Floyd, GA          | -0.003        | 53.9               | 88.54          |
| 13117       | Forsyth, GA        | -0.044        | 36.2               | 3.73           |
| 13119       | Franklin, GA       | 0.018         | 63.13              | 84.62          |
| 13121       | Fulton, GA         | -0.216        | 1.24               | 52.68          |
| 13123       | Gilmer, GA         | -0.062        | 28.56              | 55.99          |
| 13125       | Glascocock, GA     | 0.234         | 97.48              | 68.6           |
| 13127       | Glynn, GA          | -0.132        | 7.9                | 71.59          |
| 13129       | Gordon, GA         | -0.033        | 41.36              | 88.06          |
| 13131       | Grady, GA          | -0.03         | 42.5               | 92.58          |
| 13133       | Greene, GA         | -0.207        | 1.53               | 53.79          |
| 13135       | Gwinnett, GA       | -0.175        | 2.87               | 43.47          |
| 13137       | Habersham, GA      | 0.023         | 65.55              | 71.46          |
| 13139       | Hall, GA           | -0.044        | 36.39              | 66.18          |
| 13141       | Hancock, GA        | 0.14          | 92.58              | 79.84          |
| 13143       | Haralson, GA       | -0.004        | 53.45              | 54.27          |
| 13145       | Harris, GA         | -0.032        | 41.77              | 13.41          |
| 13147       | Hart, GA           | -0.056        | 31.33              | 71.94          |
| 13149       | Heard, GA          | 0.144         | 93.03              | 72.32          |
| 13151       | Henry, GA          | -0.164        | 3.69               | 31.37          |
| 13153       | Houston, GA        | -0.008        | 51.32              | 56.69          |
| 13155       | Irwin, GA          | 0.006         | 58.33              | 84.08          |
| 13157       | Jackson, GA        | 0.009         | 59.69              | 35.16          |
| 13159       | Jasper, GA         | 0.121         | 90.54              | 69.27          |
| 13161       | Jeff Davis, GA     | 0.164         | 94.36              | 93.73          |
| 13163       | Jefferson, GA      | 0.102         | 87.14              | 94.39          |
| 13165       | Jenkins, GA        | 0.028         | 67.49              | 82.83          |
| 13167       | Johnson, GA        | 0.186         | 95.7               | 90.61          |
| 13169       | Jones, GA          | 0.015         | 62.11              | 37.93          |
| 13171       | Lamar, GA          | 0.098         | 86.34              | 49.17          |
| 13173       | Lanier, GA         | 0.056         | 76.82              | 86.97          |
| 13175       | Laurens, GA        | 0.022         | 64.79              | 80.13          |
| 13177       | Lee, GA            | 0.05          | 75.07              | 35.19          |
| 13179       | Liberty, GA        | 0.068         | 80.23              | 88.82          |
| 13181       | Lincoln, GA        | -0.062        | 28.65              | 55.64          |
| 13183       | Long, GA           | 0.126         | 91.05              | 82.71          |
| 13185       | Lowndes, GA        | 0.025         | 66.35              | 86.62          |
| 13187       | Lumpkin, GA        | -0.037        | 39.6               | 43.38          |
| 13189       | McDuffie, GA       | -0.028        | 43.27              | 93.76          |
| 13191       | McIntosh, GA       | -0.12         | 9.93               | 58.63          |
| 13193       | Macon, GA          | 0.171         | 94.56              | 93.12          |
| 13195       | Madison, GA        | 0.076         | 82.23              | 64.17          |
| 13197       | Marion, GA         | -0.02         | 46.35              | 85.19          |

| County FIPS | County Description | DOS-SVI Index | DOS-SVI Percentile | SVI Percentile |
|-------------|--------------------|---------------|--------------------|----------------|
| 13199       | Meriwether, GA     | -0.032        | 41.67              | 87.01          |
| 13201       | Miller, GA         | 0.196         | 96.24              | 77.99          |
| 13205       | Mitchell, GA       | 0.138         | 92.2               | 98.79          |
| 13207       | Monroe, GA         | 0.033         | 69.98              | 45.96          |
| 13209       | Montgomery, GA     | 0.119         | 90.19              | 84.65          |
| 13211       | Morgan, GA         | -0.056        | 31.17              | 24.46          |
| 13213       | Murray, GA         | 0.122         | 90.7               | 71.34          |
| 13215       | Muscogee, GA       | -0.075        | 23.02              | 90.03          |
| 13217       | Newton, GA         | -0.047        | 34.7               | 70.7           |
| 13219       | Oconee, GA         | -0.024        | 44.6               | 3.54           |
| 13221       | Oglethorpe, GA     | -0.021        | 46.23              | 52.17          |
| 13223       | Paulding, GA       | -0.021        | 45.91              | 13.76          |
| 13225       | Peach, GA          | -0.008        | 51.89              | 94.04          |
| 13227       | Pickens, GA        | 0.02          | 64.18              | 27.96          |
| 13229       | Pierce, GA         | -0.016        | 48.23              | 65.7           |
| 13231       | Pike, GA           | 0.083         | 83.51              | 15.1           |
| 13233       | Polk, GA           | 0.012         | 60.78              | 80.48          |
| 13235       | Pulaski, GA        | -0.068        | 25.66              | 84.59          |
| 13237       | Putnam, GA         | -0.105        | 13.53              | 42.8           |
| 13239       | Quitman, GA        | 0.038         | 71.73              | 94.33          |
| 13241       | Rabun, GA          | -0.094        | 16.24              | 53.41          |
| 13243       | Randolph, GA       | 0.091         | 85.07              | 97.39          |
| 13245       | Richmond, GA       | -0.038        | 39.29              | 93.28          |
| 13247       | Rockdale, GA       | -0.163        | 3.73               | 55.29          |
| 13249       | Schley, GA         | 0.102         | 87.11              | 82.48          |
| 13251       | Screven, GA        | 0.117         | 89.88              | 85.25          |
| 13253       | Seminole, GA       | 0.099         | 86.76              | 83.44          |
| 13255       | Spalding, GA       | -0.036        | 40.05              | 86.91          |
| 13257       | Stephens, GA       | 0.12          | 90.23              | 79.68          |
| 13259       | Stewart, GA        | 0.094         | 85.58              | 92.45          |
| 13261       | Sumter, GA         | 0.013         | 61.22              | 97.64          |
| 13263       | Talbot, GA         | -0.005        | 52.91              | 85.89          |
| 13265       | Taliaferro, GA     | -0.053        | 32.41              | 90.89          |
| 13267       | Tattnall, GA       | 0.253         | 97.74              | 90.8           |
| 13269       | Taylor, GA         | 0.124         | 90.93              | 91.97          |
| 13271       | Telfair, GA        | -0.038        | 39.35              | 83.69          |
| 13273       | Terrell, GA        | 0.004         | 57.08              | 95.7           |
| 13275       | Thomas, GA         | -0.004        | 53.65              | 91.08          |
| 13277       | Tift, GA           | 0.029         | 68.1               | 88.09          |
| 13279       | Toombs, GA         | 0.108         | 88.54              | 97.61          |
| 13281       | Towns, GA          | -0.145        | 5.79               | 32.58          |
| 13283       | Treutlen, GA       | 0.104         | 87.68              | 94.71          |
| 13285       | Troup, GA          | -0.048        | 34.23              | 90.13          |
| 13287       | Turner, GA         | -0.035        | 40.85              | 98.09          |
| 13289       | Twiggs, GA         | -0.07         | 24.93              | 75.8           |
| 13291       | Union, GA          | -0.162        | 3.82               | 31.15          |
| 13293       | Upson, GA          | 0.065         | 79.5               | 85.32          |
| 13295       | Walker, GA         | 0.015         | 61.92              | 64.08          |
| 13297       | Walton, GA         | -0.034        | 41.01              | 29.3           |
| 13299       | Ware, GA           | 0.013         | 61.32              | 84.49          |
| 13301       | Warren, GA         | -0.022        | 45.78              | 89.46          |
| 13303       | Washington, GA     | 0.078         | 82.65              | 94.62          |
| 13305       | Wayne, GA          | 0.208         | 96.62              | 91.66          |
| 13307       | Webster, GA        | -0.141        | 6.24               | 78.76          |
| 13309       | Wheeler, GA        | 0.38          | 98.98              | 81.24          |

| <b>County FIPS</b> | <b>County Description</b> | <b>DOS-SVI Index</b> | <b>DOS-SVI Percentile</b> | <b>SVI Percentile</b> |
|--------------------|---------------------------|----------------------|---------------------------|-----------------------|
| 13311              | White, GA                 | -0.052               | 32.6                      | 23.57                 |
| 13313              | Whitfield, GA             | 0.025                | 66.22                     | 87.93                 |
| 13315              | Wilcox, GA                | 0.211                | 96.66                     | 81.69                 |
| 13317              | Wilkes, GA                | -0.132               | 7.86                      | 75.61                 |
| 13319              | Wilkinson, GA             | 0.074                | 81.73                     | 78.73                 |
| 13321              | Worth, GA                 | -0.078               | 21.97                     | 73.57                 |
| 15001              | Hawaii, HI                | -0.007               | 52.15                     | 57.71                 |
| 15003              | Honolulu, HI              | -0.003               | 53.87                     | 47.2                  |
| 15005              | Kalawao, HI               | -0.088               | 17.89                     | 31.62                 |
| 15007              | Kauai, HI                 | 0.002                | 56.29                     | 30.99                 |
| 15009              | Maui, HI                  | 0.071                | 81.18                     | 38.79                 |
| 16001              | Ada, ID                   | -0.045               | 35.98                     | 13.73                 |
| 16003              | Adams, ID                 | -0.003               | 54.19                     | 29.36                 |
| 16005              | Bannock, ID               | 0.083                | 83.57                     | 57.9                  |
| 16007              | Bear Lake, ID             | 0.019                | 63.42                     | 21.43                 |
| 16009              | Benewah, ID               | 0.181                | 95.32                     | 73.34                 |
| 16011              | Bingham, ID               | 0.09                 | 84.85                     | 50.7                  |
| 16013              | Blaine, ID                | -0.239               | 0.76                      | 32.39                 |
| 16015              | Boise, ID                 | -0.047               | 35.12                     | 6.72                  |
| 16017              | Bonner, ID                | -0.052               | 32.7                      | 24.01                 |
| 16019              | Bonneville, ID            | 0.079                | 83                        | 36.34                 |
| 16021              | Boundary, ID              | 0.045                | 73.8                      | 30.83                 |
| 16023              | Butte, ID                 | 0.035                | 70.55                     | 24.62                 |
| 16025              | Camas, ID                 | -0.05                | 33.59                     | 13.38                 |
| 16027              | Canyon, ID                | 0.093                | 85.55                     | 73.66                 |
| 16029              | Caribou, ID               | 0.124                | 90.99                     | 19.17                 |
| 16031              | Cassia, ID                | 0.019                | 63.67                     | 67.32                 |
| 16033              | Clark, ID                 | 0.179                | 95.16                     | 89.11                 |
| 16035              | Clearwater, ID            | 0.032                | 69.82                     | 44.01                 |
| 16037              | Custer, ID                | -0.14                | 6.34                      | 43.69                 |
| 16039              | Elmore, ID                | 0.034                | 70.33                     | 58.82                 |
| 16041              | Franklin, ID              | 0.161                | 94.08                     | 14.14                 |
| 16043              | Fremont, ID               | 0.18                 | 95.29                     | 51.37                 |
| 16045              | Gem, ID                   | -0.053               | 32.22                     | 66.27                 |
| 16047              | Gooding, ID               | 0.045                | 73.89                     | 70.76                 |
| 16049              | Idaho, ID                 | 0.093                | 85.29                     | 53.92                 |
| 16051              | Jefferson, ID             | 0.216                | 96.88                     | 25.25                 |
| 16053              | Jerome, ID                | 0.028                | 67.62                     | 67.36                 |
| 16055              | Kootenai, ID              | -0.047               | 35.15                     | 23.28                 |
| 16057              | Latah, ID                 | 0.035                | 70.71                     | 24.84                 |
| 16059              | Lemhi, ID                 | 0.026                | 66.54                     | 29.97                 |
| 16061              | Lewis, ID                 | 0.053                | 76.15                     | 56.78                 |
| 16063              | Lincoln, ID               | 0.131                | 91.66                     | 55.76                 |
| 16065              | Madison, ID               | 0.277                | 98.06                     | 40.29                 |
| 16067              | Minidoka, ID              | -0.114               | 11.53                     | 67.83                 |
| 16069              | Nez Perce, ID             | -0.027               | 43.74                     | 50.67                 |
| 16071              | Oneida, ID                | 0.103                | 87.42                     | 34.24                 |
| 16073              | Owyhee, ID                | 0.058                | 77.3                      | 82.45                 |
| 16075              | Payette, ID               | 0.14                 | 92.49                     | 60.1                  |
| 16077              | Power, ID                 | 0.105                | 87.93                     | 51.62                 |
| 16079              | Shoshone, ID              | 0.026                | 66.73                     | 75.7                  |
| 16081              | Teton, ID                 | 0.068                | 80.17                     | 13.44                 |
| 16083              | Twin Falls, ID            | 0.015                | 61.8                      | 49.55                 |
| 16085              | Valley, ID                | -0.066               | 26.33                     | 8.82                  |
| 16087              | Washington, ID            | -0.107               | 12.93                     | 85.06                 |

| <b>County FIPS</b> | <b>County Description</b> | <b>DOS-SVI Index</b> | <b>DOS-SVI Percentile</b> | <b>SVI Percentile</b> |
|--------------------|---------------------------|----------------------|---------------------------|-----------------------|
| 17001              | Adams, IL                 | -0.041               | 37.92                     | 24.9                  |
| 17003              | Alexander, IL             | -0.118               | 10.6                      | 95.73                 |
| 17005              | Bond, IL                  | 0.15                 | 93.47                     | 37.32                 |
| 17007              | Boone, IL                 | -0.037               | 39.64                     | 46.97                 |
| 17009              | Brown, IL                 | 0.225                | 97.17                     | 47.45                 |
| 17011              | Bureau, IL                | -0.112               | 11.88                     | 28.63                 |
| 17013              | Calhoun, IL               | 0.034                | 70.36                     | 19.01                 |
| 17015              | Carroll, IL               | -0.086               | 18.34                     | 16.82                 |
| 17017              | Cass, IL                  | -0.069               | 25.28                     | 69.71                 |
| 17019              | Champaign, IL             | 0.065                | 79.31                     | 49.9                  |
| 17021              | Christian, IL             | -0.059               | 30.09                     | 24.08                 |
| 17023              | Clark, IL                 | -0.029               | 42.88                     | 20.73                 |
| 17025              | Clay, IL                  | 0.02                 | 64.06                     | 61.15                 |
| 17027              | Clinton, IL               | 0.021                | 64.63                     | 17.87                 |
| 17029              | Coles, IL                 | -0.056               | 31.14                     | 49.78                 |
| 17031              | Cook, IL                  | -0.106               | 13.24                     | 67.55                 |
| 17033              | Crawford, IL              | 0.036                | 70.9                      | 38.38                 |
| 17035              | Cumberland, IL            | 0.006                | 58.2                      | 16.27                 |
| 17037              | DeKalb, IL                | -0.047               | 34.8                      | 48.66                 |
| 17039              | De Witt, IL               | -0.034               | 41.07                     | 12.9                  |
| 17041              | Douglas, IL               | 0.077                | 82.36                     | 44.39                 |
| 17043              | DuPage, IL                | -0.148               | 5.38                      | 16.11                 |
| 17045              | Edgar, IL                 | -0.075               | 22.89                     | 34.33                 |
| 17047              | Edwards, IL               | 0.04                 | 72.4                      | 24.43                 |
| 17049              | Effingham, IL             | 0.008                | 59.19                     | 19.9                  |
| 17051              | Fayette, IL               | 0.051                | 75.36                     | 59.49                 |
| 17053              | Ford, IL                  | -0.071               | 24.64                     | 30.51                 |
| 17055              | Franklin, IL              | 0.021                | 64.37                     | 60.92                 |
| 17057              | Fulton, IL                | -0.044               | 36.48                     | 57.61                 |
| 17059              | Gallatin, IL              | -0.103               | 13.88                     | 45.38                 |
| 17061              | Greene, IL                | -0.022               | 45.72                     | 19.52                 |
| 17063              | Grundy, IL                | -0.017               | 47.91                     | 8.44                  |
| 17065              | Hamilton, IL              | -0.032               | 41.71                     | 15.29                 |
| 17067              | Hancock, IL               | -0.023               | 45.27                     | 12.32                 |
| 17069              | Hardin, IL                | 0.129                | 91.44                     | 50.19                 |
| 17071              | Henderson, IL             | -0.082               | 20.15                     | 6.69                  |
| 17073              | Henry, IL                 | -0.08                | 21.01                     | 20.1                  |
| 17075              | Iroquois, IL              | -0.047               | 34.99                     | 34.04                 |
| 17077              | Jackson, IL               | 0.007                | 58.68                     | 70.45                 |
| 17079              | Jasper, IL                | 0.037                | 71.54                     | 24.17                 |
| 17081              | Jefferson, IL             | 0.023                | 65.52                     | 81.08                 |
| 17083              | Jersey, IL                | -0.002               | 54.95                     | 10.41                 |
| 17085              | Jo Daviess, IL            | -0.102               | 14.1                      | 5.25                  |
| 17087              | Johnson, IL               | 0.116                | 89.59                     | 46.24                 |
| 17089              | Kane, IL                  | -0.09                | 17.13                     | 41.69                 |
| 17091              | Kankakee, IL              | -0.017               | 47.95                     | 66.56                 |
| 17093              | Kendall, IL               | -0.035               | 40.69                     | 13.98                 |
| 17095              | Knox, IL                  | -0.007               | 51.99                     | 64.62                 |
| 17097              | Lake, IL                  | -0.113               | 11.59                     | 35.13                 |
| 17099              | LaSalle, IL               | -0.052               | 32.63                     | 43.03                 |
| 17101              | Lawrence, IL              | 0.126                | 91.12                     | 77.83                 |
| 17103              | Lee, IL                   | -0.002               | 54.6                      | 30.1                  |
| 17105              | Livingston, IL            | -0.02                | 46.39                     | 48.41                 |
| 17107              | Logan, IL                 | 0.05                 | 75.17                     | 22.71                 |
| 17109              | McDonough, IL             | 0.048                | 74.4                      | 51.66                 |

| County FIPS | County Description | DOS-SVI Index | DOS-SVI Percentile | SVI Percentile |
|-------------|--------------------|---------------|--------------------|----------------|
| 17111       | McHenry, IL        | -0.065        | 26.97              | 7.01           |
| 17113       | McLean, IL         | -0.069        | 25.44              | 19.04          |
| 17115       | Macon, IL          | -0.059        | 29.93              | 59.71          |
| 17117       | Macoupin, IL       | -0.014        | 49.28              | 19.87          |
| 17119       | Madison, IL        | -0.023        | 45.37              | 29.65          |
| 17121       | Marion, IL         | 0.039         | 72.02              | 73.85          |
| 17123       | Marshall, IL       | -0.065        | 27.28              | 5.45           |
| 17125       | Mason, IL          | -0.046        | 35.72              | 29.46          |
| 17127       | Massac, IL         | 0.042         | 72.91              | 75.13          |
| 17129       | Menard, IL         | -0.053        | 32.38              | 4.84           |
| 17131       | Mercer, IL         | -0.064        | 27.48              | 11.34          |
| 17133       | Monroe, IL         | -0.048        | 34.42              | 0.16           |
| 17135       | Montgomery, IL     | 0.058         | 77.33              | 39.14          |
| 17137       | Morgan, IL         | -0.024        | 44.89              | 50.45          |
| 17139       | Moultrie, IL       | 0.146         | 93.19              | 29.49          |
| 17141       | Ogle, IL           | -0.048        | 34.03              | 29.17          |
| 17143       | Peoria, IL         | -0.092        | 16.52              | 61.31          |
| 17145       | Perry, IL          | 0.031         | 68.86              | 64.87          |
| 17147       | Piatt, IL          | -0.075        | 22.83              | 0.32           |
| 17149       | Pike, IL           | 0.004         | 56.86              | 34.94          |
| 17151       | Pope, IL           | 0.068         | 80.1               | 45.45          |
| 17153       | Pulaski, IL        | 0.047         | 74.21              | 69.43          |
| 17155       | Putnam, IL         | -0.132        | 7.96               | 2.77           |
| 17157       | Randolph, IL       | 0.032         | 69.44              | 45.67          |
| 17159       | Richland, IL       | -0.036        | 39.92              | 41.05          |
| 17161       | Rock Island, IL    | -0.113        | 11.78              | 71.37          |
| 17163       | St. Clair, IL      | -0.055        | 31.49              | 52.29          |
| 17165       | Saline, IL         | 0.018         | 63.04              | 86.37          |
| 17167       | Sangamon, IL       | -0.061        | 29.26              | 43.57          |
| 17169       | Schuyler, IL       | -0.059        | 30.05              | 57.07          |
| 17171       | Scott, IL          | 0.036         | 71.03              | 13.54          |
| 17173       | Shelby, IL         | 0.001         | 55.97              | 8.5            |
| 17175       | Stark, IL          | -0.097        | 15.54              | 6.34           |
| 17177       | Stephenson, IL     | -0.124        | 9.2                | 50             |
| 17179       | Tazewell, IL       | -0.043        | 36.71              | 10.7           |
| 17181       | Union, IL          | 0.032         | 69.37              | 68.44          |
| 17183       | Vermilion, IL      | -0.011        | 50.08              | 81.31          |
| 17185       | Wabash, IL         | -0.014        | 49.06              | 32.07          |
| 17187       | Warren, IL         | 0.071         | 80.8               | 60.73          |
| 17189       | Washington, IL     | 0.004         | 57.31              | 6.53           |
| 17191       | Wayne, IL          | 0.041         | 72.75              | 43.31          |
| 17193       | White, IL          | 0.032         | 69.31              | 53.82          |
| 17195       | Whiteside, IL      | -0.082        | 19.99              | 32.83          |
| 17197       | Will, IL           | -0.071        | 24.48              | 20.22          |
| 17199       | Williamson, IL     | -0.016        | 48.33              | 48.06          |
| 17201       | Winnebago, IL      | -0.069        | 25.09              | 72.04          |
| 17203       | Woodford, IL       | 0.007         | 58.71              | 1.88           |
| 18001       | Adams, IN          | 0.238         | 97.58              | 59.04          |
| 18003       | Allen, IN          | -0.09         | 17.1               | 52.36          |
| 18005       | Bartholomew, IN    | -0.026        | 43.9               | 36.31          |
| 18007       | Benton, IN         | -0.033        | 41.29              | 33.47          |
| 18009       | Blackford, IN      | 0.004         | 57.02              | 37.1           |
| 18011       | Boone, IN          | -0.046        | 35.31              | 4.49           |
| 18013       | Brown, IN          | -0.089        | 17.35              | 6.02           |
| 18015       | Carroll, IN        | -0.003        | 54.25              | 11.75          |

| <b>County FIPS</b> | <b>County Description</b> | <b>DOS-SVI Index</b> | <b>DOS-SVI Percentile</b> | <b>SVI Percentile</b> |
|--------------------|---------------------------|----------------------|---------------------------|-----------------------|
| 18017              | Cass, IN                  | -0.063               | 27.92                     | 71.97                 |
| 18019              | Clark, IN                 | -0.067               | 26.2                      | 25.48                 |
| 18021              | Clay, IN                  | 0.004                | 56.7                      | 33.38                 |
| 18023              | Clinton, IN               | -0.021               | 46.2                      | 57.1                  |
| 18025              | Crawford, IN              | 0.052                | 75.8                      | 38.89                 |
| 18027              | Daviess, IN               | 0.206                | 96.53                     | 68.82                 |
| 18029              | Dearborn, IN              | -0.044               | 36.58                     | 7.99                  |
| 18031              | Decatur, IN               | -0.029               | 42.73                     | 21.02                 |
| 18033              | DeKalb, IN                | -0.052               | 32.73                     | 23.34                 |
| 18035              | Delaware, IN              | -0.026               | 43.94                     | 56.66                 |
| 18037              | Dubois, IN                | -0.013               | 49.6                      | 20.8                  |
| 18039              | Elkhart, IN               | -0.029               | 42.95                     | 77.01                 |
| 18041              | Fayette, IN               | -0.025               | 44.38                     | 61.08                 |
| 18043              | Floyd, IN                 | -0.094               | 15.98                     | 16.69                 |
| 18045              | Fountain, IN              | 0.007                | 58.9                      | 20.32                 |
| 18047              | Franklin, IN              | -0.021               | 46.04                     | 14.71                 |
| 18049              | Fulton, IN                | -0.003               | 54.35                     | 34.59                 |
| 18051              | Gibson, IN                | 0.034                | 70.45                     | 31.5                  |
| 18053              | Grant, IN                 | -0.039               | 38.71                     | 73.31                 |
| 18055              | Greene, IN                | 0.105                | 87.81                     | 44.43                 |
| 18057              | Hamilton, IN              | -0.084               | 19.23                     | 2.55                  |
| 18059              | Hancock, IN               | -0.074               | 23.46                     | 1.69                  |
| 18061              | Harrison, IN              | 0.028                | 67.75                     | 18.66                 |
| 18063              | Hendricks, IN             | -0.068               | 25.98                     | 8.15                  |
| 18065              | Henry, IN                 | -0.015               | 48.81                     | 37.93                 |
| 18067              | Howard, IN                | -0.106               | 13.18                     | 48.15                 |
| 18069              | Huntington, IN            | 0.009                | 59.57                     | 12.48                 |
| 18071              | Jackson, IN               | -0.027               | 43.68                     | 53.89                 |
| 18073              | Jasper, IN                | -0.007               | 52.34                     | 26.85                 |
| 18075              | Jay, IN                   | 0.107                | 88.19                     | 67.48                 |
| 18077              | Jefferson, IN             | 0.013                | 61.09                     | 44.14                 |
| 18079              | Jennings, IN              | 0.076                | 82.01                     | 38.47                 |
| 18081              | Johnson, IN               | -0.059               | 29.96                     | 14.24                 |
| 18083              | Knox, IN                  | -0.014               | 49.12                     | 59.27                 |
| 18085              | Kosciusko, IN             | 0.009                | 59.6                      | 46.08                 |
| 18087              | LaGrange, IN              | 0.362                | 98.85                     | 37.07                 |
| 18089              | Lake, IN                  | -0.088               | 17.7                      | 72.52                 |
| 18091              | LaPorte, IN               | 0.049                | 74.85                     | 72.17                 |
| 18093              | Lawrence, IN              | -0.027               | 43.49                     | 27.52                 |
| 18095              | Madison, IN               | -0.04                | 38.05                     | 67.13                 |
| 18097              | Marion, IN                | -0.121               | 9.9                       | 79.71                 |
| 18099              | Marshall, IN              | 0.099                | 86.56                     | 57.96                 |
| 18101              | Martin, IN                | -0.007               | 52.37                     | 23.98                 |
| 18103              | Miami, IN                 | 0.042                | 73.16                     | 58.79                 |
| 18105              | Monroe, IN                | -0.03                | 42.6                      | 45.19                 |
| 18107              | Montgomery, IN            | -0.041               | 37.85                     | 36.85                 |
| 18109              | Morgan, IN                | 0.018                | 63.16                     | 21.56                 |
| 18111              | Newton, IN                | -0.074               | 23.34                     | 33.66                 |
| 18113              | Noble, IN                 | 0.019                | 63.9                      | 47.42                 |
| 18115              | Ohio, IN                  | -0.099               | 14.99                     | 2.52                  |
| 18117              | Orange, IN                | 0.02                 | 63.99                     | 64.55                 |
| 18119              | Owen, IN                  | 0.06                 | 77.71                     | 34.55                 |
| 18121              | Parke, IN                 | 0.186                | 95.67                     | 58.09                 |
| 18123              | Perry, IN                 | -0.015               | 48.58                     | 31.02                 |
| 18125              | Pike, IN                  | -0.001               | 55.17                     | 17.45                 |



| <b>County FIPS</b> | <b>County Description</b> | <b>DOS-SVI Index</b> | <b>DOS-SVI Percentile</b> | <b>SVI Percentile</b> |
|--------------------|---------------------------|----------------------|---------------------------|-----------------------|
| 18127              | Porter, IN                | -0.067               | 26.01                     | 14.78                 |
| 18129              | Posey, IN                 | -0.02                | 46.51                     | 1.05                  |
| 18131              | Pulaski, IN               | 0.013                | 61.35                     | 23.09                 |
| 18133              | Putnam, IN                | 0.109                | 88.79                     | 34.84                 |
| 18135              | Randolph, IN              | -0.069               | 25.31                     | 42.96                 |
| 18137              | Ripley, IN                | 0.066                | 79.69                     | 37.74                 |
| 18139              | Rush, IN                  | -0.058               | 30.34                     | 25.67                 |
| 18141              | St. Joseph, IN            | -0.064               | 27.51                     | 62.23                 |
| 18143              | Scott, IN                 | 0.035                | 70.65                     | 42.01                 |
| 18145              | Shelby, IN                | -0.043               | 36.77                     | 21.82                 |
| 18147              | Spencer, IN               | -0.004               | 53.84                     | 8.79                  |
| 18149              | Starke, IN                | 0.043                | 73.19                     | 34.17                 |
| 18151              | Steuben, IN               | -0.046               | 35.53                     | 27.1                  |
| 18153              | Sullivan, IN              | 0.069                | 80.42                     | 64.01                 |
| 18155              | Switzerland, IN           | 0.118                | 90.07                     | 62.71                 |
| 18157              | Tippecanoe, IN            | -0.036               | 40.27                     | 49.3                  |
| 18159              | Tipton, IN                | -0.056               | 31.45                     | 7.26                  |
| 18161              | Union, IN                 | -0.015               | 48.62                     | 17.13                 |
| 18163              | Vanderburgh, IN           | -0.076               | 22.48                     | 52.42                 |
| 18165              | Vermillion, IN            | -0.009               | 51.07                     | 45.03                 |
| 18167              | Vigo, IN                  | 0.037                | 71.44                     | 72.74                 |
| 18169              | Wabash, IN                | -0.019               | 47.02                     | 28.82                 |
| 18171              | Warren, IN                | -0.061               | 29.13                     | 7.8                   |
| 18173              | Warrick, IN               | -0.035               | 40.78                     | 6.78                  |
| 18175              | Washington, IN            | 0.048                | 74.37                     | 37.77                 |
| 18177              | Wayne, IN                 | -0.058               | 30.28                     | 71.05                 |
| 18179              | Wells, IN                 | -0.054               | 31.9                      | 14.39                 |
| 18181              | White, IN                 | -0.032               | 41.55                     | 24.39                 |
| 18183              | Whitley, IN               | -0.079               | 21.27                     | 3.15                  |
| 19001              | Adair, IA                 | -0.086               | 18.37                     | 5.38                  |
| 19003              | Adams, IA                 | -0.037               | 39.57                     | 3.76                  |
| 19005              | Allamakee, IA             | -0.015               | 48.77                     | 32.2                  |
| 19007              | Appanoose, IA             | 0.026                | 66.67                     | 37.83                 |
| 19009              | Audubon, IA               | -0.122               | 9.62                      | 2.26                  |
| 19011              | Benton, IA                | -0.038               | 39.26                     | 1.18                  |
| 19013              | Black Hawk, IA            | -0.094               | 16.05                     | 42.64                 |
| 19015              | Boone, IA                 | -0.04                | 38.14                     | 11.78                 |
| 19017              | Bremer, IA                | -0.05                | 33.62                     | 3.22                  |
| 19019              | Buchanan, IA              | 0.001                | 55.91                     | 6.62                  |
| 19021              | Buena Vista, IA           | -0.011               | 50.3                      | 74.08                 |
| 19023              | Butler, IA                | -0.062               | 28.4                      | 2.36                  |
| 19025              | Calhoun, IA               | -0.05                | 33.4                      | 15.8                  |
| 19027              | Carroll, IA               | -0.088               | 17.73                     | 4.55                  |
| 19029              | Cass, IA                  | -0.121               | 9.77                      | 19.81                 |
| 19031              | Cedar, IA                 | -0.036               | 39.99                     | 0.8                   |
| 19033              | Cerro Gordo, IA           | -0.108               | 12.67                     | 24.97                 |
| 19035              | Cherokee, IA              | -0.147               | 5.7                       | 17.01                 |
| 19037              | Chickasaw, IA             | -0.068               | 25.85                     | 5.99                  |
| 19039              | Clarke, IA                | 0.025                | 66.16                     | 48.47                 |
| 19041              | Clay, IA                  | -0.072               | 24.26                     | 34.39                 |
| 19043              | Clayton, IA               | -0.046               | 35.69                     | 18.41                 |
| 19045              | Clinton, IA               | -0.1                 | 14.58                     | 26.46                 |
| 19047              | Crawford, IA              | -0.039               | 38.68                     | 85.51                 |
| 19049              | Dallas, IA                | -0.046               | 35.24                     | 5.96                  |
| 19051              | Davis, IA                 | 0.39                 | 99.14                     | 35.03                 |

| <b>County FIPS</b> | <b>County Description</b> | <b>DOS-SVI Index</b> | <b>DOS-SVI Percentile</b> | <b>SVI Percentile</b> |
|--------------------|---------------------------|----------------------|---------------------------|-----------------------|
| 19053              | Decatur, IA               | 0.118                | 90.13                     | 68.22                 |
| 19055              | Delaware, IA              | -0.022               | 45.84                     | 3.44                  |
| 19057              | Des Moines, IA            | -0.114               | 11.43                     | 46.53                 |
| 19059              | Dickinson, IA             | -0.183               | 2.48                      | 9.17                  |
| 19061              | Dubuque, IA               | -0.038               | 39.32                     | 23.47                 |
| 19063              | Emmet, IA                 | -0.002               | 54.82                     | 39.46                 |
| 19065              | Fayette, IA               | -0.104               | 13.66                     | 22.52                 |
| 19067              | Floyd, IA                 | -0.054               | 31.87                     | 35.96                 |
| 19069              | Franklin, IA              | -0.117               | 10.73                     | 19.62                 |
| 19071              | Fremont, IA               | -0.013               | 49.79                     | 5.54                  |
| 19073              | Greene, IA                | -0.013               | 49.83                     | 19.78                 |
| 19075              | Grundy, IA                | -0.066               | 26.65                     | 0.38                  |
| 19077              | Guthrie, IA               | -0.085               | 18.66                     | 12.2                  |
| 19079              | Hamilton, IA              | -0.067               | 26.17                     | 11.53                 |
| 19081              | Hancock, IA               | -0.076               | 22.35                     | 7.13                  |
| 19083              | Hardin, IA                | -0.024               | 44.41                     | 12.42                 |
| 19085              | Harrison, IA              | -0.069               | 25.41                     | 6.46                  |
| 19087              | Henry, IA                 | -0.065               | 27.38                     | 31.34                 |
| 19089              | Howard, IA                | -0.047               | 34.89                     | 15.67                 |
| 19091              | Humboldt, IA              | -0.081               | 20.31                     | 14.46                 |
| 19093              | Ida, IA                   | -0.042               | 37.31                     | 8.66                  |
| 19095              | Iowa, IA                  | -0.039               | 38.46                     | 3.47                  |
| 19097              | Jackson, IA               | -0.057               | 30.91                     | 12.68                 |
| 19099              | Jasper, IA                | -0.008               | 51.64                     | 25.48                 |
| 19101              | Jefferson, IA             | -0.052               | 32.54                     | 48.95                 |
| 19103              | Johnson, IA               | -0.075               | 22.57                     | 26.75                 |
| 19105              | Jones, IA                 | 0.023                | 65.65                     | 19.24                 |
| 19107              | Keokuk, IA                | -0.049               | 33.75                     | 3.98                  |
| 19109              | Kossuth, IA               | -0.12                | 10.03                     | 10.48                 |
| 19111              | Lee, IA                   | -0.042               | 37.15                     | 50.41                 |
| 19113              | Linn, IA                  | -0.092               | 16.65                     | 18.06                 |
| 19115              | Louisa, IA                | -0.018               | 47.25                     | 45.7                  |
| 19117              | Lucas, IA                 | -0.076               | 22.32                     | 27.55                 |
| 19119              | Lyon, IA                  | -0.024               | 44.51                     | 4.39                  |
| 19121              | Madison, IA               | -0.007               | 52.09                     | 2.04                  |
| 19123              | Mahaska, IA               | 0.015                | 62.08                     | 46.37                 |
| 19125              | Marion, IA                | 0.007                | 58.74                     | 19.49                 |
| 19127              | Marshall, IA              | -0.069               | 25.18                     | 68.63                 |
| 19129              | Mills, IA                 | -0.01                | 50.59                     | 10.76                 |
| 19131              | Mitchell, IA              | -0.047               | 35.05                     | 8.6                   |
| 19133              | Monona, IA                | -0.129               | 8.44                      | 17.96                 |
| 19135              | Monroe, IA                | 0.061                | 78.42                     | 25.19                 |
| 19137              | Montgomery, IA            | -0.047               | 34.92                     | 52.8                  |
| 19139              | Muscatine, IA             | -0.104               | 13.72                     | 39.04                 |
| 19141              | O'Brien, IA               | 0                    | 55.52                     | 23.22                 |
| 19143              | Osceola, IA               | -0.037               | 39.51                     | 26.34                 |
| 19145              | Page, IA                  | -0.076               | 22.45                     | 33.41                 |
| 19147              | Palo Alto, IA             | -0.063               | 28.14                     | 17.29                 |
| 19149              | Plymouth, IA              | -0.089               | 17.54                     | 12.71                 |
| 19151              | Pocahontas, IA            | -0.073               | 23.62                     | 14.62                 |
| 19153              | Polk, IA                  | -0.104               | 13.82                     | 37.68                 |
| 19155              | Pottawattamie, IA         | -0.062               | 28.49                     | 45.99                 |
| 19157              | Poweshiek, IA             | -0.048               | 34.35                     | 15.48                 |
| 19159              | Ringgold, IA              | -0.031               | 42.06                     | 12.99                 |
| 19161              | Sac, IA                   | -0.139               | 6.5                       | 7.48                  |

| <b>County FIPS</b> | <b>County Description</b> | <b>DOS-SVI Index</b> | <b>DOS-SVI Percentile</b> | <b>SVI Percentile</b> |
|--------------------|---------------------------|----------------------|---------------------------|-----------------------|
| 19163              | Scott, IA                 | -0.098               | 15.25                     | 26.59                 |
| 19165              | Shelby, IA                | -0.08                | 20.95                     | 13.03                 |
| 19167              | Sioux, IA                 | 0.097                | 86.25                     | 22.07                 |
| 19169              | Story, IA                 | -0.065               | 27.12                     | 21.24                 |
| 19171              | Tama, IA                  | -0.032               | 41.74                     | 32.74                 |
| 19173              | Taylor, IA                | -0.064               | 27.54                     | 27.71                 |
| 19175              | Union, IA                 | -0.066               | 26.52                     | 44.55                 |
| 19177              | Van Buren, IA             | 0.089                | 84.5                      | 24.65                 |
| 19179              | Wapello, IA               | -0.029               | 42.76                     | 74.39                 |
| 19181              | Warren, IA                | -0.042               | 37.5                      | 7.2                   |
| 19183              | Washington, IA            | -0.061               | 29.1                      | 22.39                 |
| 19185              | Wayne, IA                 | 0.14                 | 92.39                     | 45.83                 |
| 19187              | Webster, IA               | -0.047               | 35.02                     | 45.8                  |
| 19189              | Winnebago, IA             | -0.051               | 33.11                     | 20.61                 |
| 19191              | Winneshiek, IA            | -0.015               | 48.84                     | 1.15                  |
| 19193              | Woodbury, IA              | -0.082               | 20.18                     | 69.68                 |
| 19195              | Worth, IA                 | -0.098               | 15.19                     | 6.97                  |
| 19197              | Wright, IA                | -0.091               | 16.87                     | 48.03                 |
| 20001              | Allen, KS                 | -0.005               | 53.3                      | 39.78                 |
| 20003              | Anderson, KS              | 0.039                | 71.95                     | 22.74                 |
| 20005              | Atchison, KS              | 0.087                | 84.21                     | 49.11                 |
| 20007              | Barber, KS                | -0.059               | 29.7                      | 28.03                 |
| 20009              | Barton, KS                | -0.088               | 17.67                     | 54.39                 |
| 20011              | Bourbon, KS               | 0.096                | 85.96                     | 58.28                 |
| 20013              | Brown, KS                 | -0.025               | 44.32                     | 27.17                 |
| 20015              | Butler, KS                | 0.07                 | 80.58                     | 26.24                 |
| 20017              | Chase, KS                 | 0.056                | 76.73                     | 40.67                 |
| 20019              | Chautauqua, KS            | 0.018                | 62.91                     | 71.88                 |
| 20021              | Cherokee, KS              | 0.031                | 69.12                     | 38.28                 |
| 20023              | Cheyenne, KS              | -0.153               | 4.71                      | 10.03                 |
| 20025              | Clark, KS                 | -0.066               | 26.55                     | 31.24                 |
| 20027              | Clay, KS                  | -0.109               | 12.54                     | 4.94                  |
| 20029              | Cloud, KS                 | -0.101               | 14.42                     | 27.39                 |
| 20031              | Coffey, KS                | -0.048               | 34.48                     | 20.35                 |
| 20033              | Comanche, KS              | -0.087               | 18.21                     | 7.93                  |
| 20035              | Cowley, KS                | -0.003               | 54.12                     | 73.18                 |
| 20037              | Crawford, KS              | 0.105                | 87.84                     | 69.87                 |
| 20039              | Decatur, KS               | -0.171               | 3.09                      | 15.73                 |
| 20041              | Dickinson, KS             | 0.027                | 67.05                     | 33.22                 |
| 20043              | Doniphan, KS              | 0.044                | 73.48                     | 23.06                 |
| 20045              | Douglas, KS               | -0.041               | 37.66                     | 22.32                 |
| 20047              | Edwards, KS               | -0.139               | 6.46                      | 37.2                  |
| 20049              | Elk, KS                   | -0.003               | 53.96                     | 38.95                 |
| 20051              | Ellis, KS                 | -0.044               | 36.33                     | 15.64                 |
| 20053              | Ellsworth, KS             | 0.081                | 83.32                     | 39.52                 |
| 20055              | Finney, KS                | 0.022                | 65.11                     | 82.36                 |
| 20057              | Ford, KS                  | -0.014               | 49.38                     | 85.7                  |
| 20059              | Franklin, KS              | 0.024                | 65.87                     | 21.37                 |
| 20061              | Geary, KS                 | 0.071                | 80.99                     | 65.76                 |
| 20063              | Gove, KS                  | -0.128               | 8.63                      | 9.75                  |
| 20065              | Graham, KS                | -0.132               | 7.83                      | 12.55                 |
| 20067              | Grant, KS                 | 0.048                | 74.47                     | 38.15                 |
| 20069              | Gray, KS                  | 0.03                 | 68.29                     | 27.36                 |
| 20071              | Greeley, KS               | -0.017               | 47.56                     | 57.52                 |
| 20073              | Greenwood, KS             | -0.032               | 41.83                     | 21.27                 |

| <b>County FIPS</b> | <b>County Description</b> | <b>DOS-SVI Index</b> | <b>DOS-SVI Percentile</b> | <b>SVI Percentile</b> |
|--------------------|---------------------------|----------------------|---------------------------|-----------------------|
| 20075              | Hamilton, KS              | -0.114               | 11.37                     | 25.86                 |
| 20077              | Harper, KS                | -0.077               | 22.16                     | 32.23                 |
| 20079              | Harvey, KS                | -0.039               | 38.78                     | 33.5                  |
| 20081              | Haskell, KS               | 0.142                | 92.71                     | 41.15                 |
| 20083              | Hodgeman, KS              | -0.011               | 50.46                     | 11.18                 |
| 20085              | Jackson, KS               | -0.024               | 45.05                     | 26.94                 |
| 20087              | Jefferson, KS             | -0.025               | 44.35                     | 5.48                  |
| 20089              | Jewell, KS                | -0.107               | 12.89                     | 8.76                  |
| 20091              | Johnson, KS               | -0.123               | 9.39                      | 6.15                  |
| 20093              | Kearny, KS                | -0.052               | 32.89                     | 46.56                 |
| 20095              | Kingman, KS               | -0.067               | 26.04                     | 5.13                  |
| 20097              | Kiowa, KS                 | 0.029                | 67.94                     | 25.8                  |
| 20099              | Labette, KS               | 0.014                | 61.57                     | 63.92                 |
| 20101              | Lane, KS                  | -0.024               | 44.48                     | 3.03                  |
| 20103              | Leavenworth, KS           | 0.009                | 59.63                     | 24.04                 |
| 20105              | Lincoln, KS               | -0.004               | 53.8                      | 13.22                 |
| 20107              | Linn, KS                  | 0.021                | 64.6                      | 44.78                 |
| 20109              | Logan, KS                 | -0.028               | 43.43                     | 12.96                 |
| 20111              | Lyon, KS                  | -0.015               | 48.71                     | 73.22                 |
| 20113              | McPherson, KS             | -0.071               | 24.45                     | 10.67                 |
| 20115              | Marion, KS                | 0.027                | 67.14                     | 17.71                 |
| 20117              | Marshall, KS              | -0.001               | 55.2                      | 12.64                 |
| 20119              | Meade, KS                 | -0.112               | 11.97                     | 37.17                 |
| 20121              | Miami, KS                 | -0.015               | 48.52                     | 2.58                  |
| 20123              | Mitchell, KS              | 0.016                | 62.43                     | 28.44                 |
| 20125              | Montgomery, KS            | -0.039               | 38.75                     | 80.29                 |
| 20127              | Morris, KS                | -0.102               | 14.04                     | 24.36                 |
| 20129              | Morton, KS                | -0.118               | 10.41                     | 40.8                  |
| 20131              | Nemaha, KS                | -0.011               | 50.17                     | 9.62                  |
| 20133              | Neosho, KS                | -0.01                | 50.81                     | 65.8                  |
| 20135              | Ness, KS                  | -0.15                | 5                         | 15                    |
| 20137              | Norton, KS                | 0.008                | 59.06                     | 29.75                 |
| 20139              | Osage, KS                 | -0.023               | 45.4                      | 23.41                 |
| 20141              | Osborne, KS               | -0.116               | 10.92                     | 7.23                  |
| 20143              | Ottawa, KS                | -0.031               | 42.28                     | 2.71                  |
| 20145              | Pawnee, KS                | -0.052               | 32.82                     | 28.66                 |
| 20147              | Phillips, KS              | -0.007               | 51.96                     | 24.2                  |
| 20149              | Pottawatomie, KS          | 0.096                | 86.02                     | 14.87                 |
| 20151              | Pratt, KS                 | 0.091                | 84.94                     | 38.73                 |
| 20153              | Rawlins, KS               | -0.1                 | 14.55                     | 13.6                  |
| 20155              | Reno, KS                  | 0.018                | 63.07                     | 58.66                 |
| 20157              | Republic, KS              | -0.08                | 20.66                     | 6.05                  |
| 20159              | Rice, KS                  | 0.023                | 65.42                     | 42.52                 |
| 20161              | Riley, KS                 | 0.041                | 72.65                     | 43.73                 |
| 20163              | Rooks, KS                 | -0.068               | 25.69                     | 14.2                  |
| 20165              | Rush, KS                  | -0.071               | 24.42                     | 7.83                  |
| 20167              | Russell, KS               | -0.049               | 33.81                     | 23.92                 |
| 20169              | Saline, KS                | -0.045               | 36.13                     | 41.62                 |
| 20171              | Scott, KS                 | 0.03                 | 68.55                     | 30.61                 |
| 20173              | Sedgwick, KS              | -0.074               | 23.5                      | 53.57                 |
| 20175              | Seward, KS                | -0.113               | 11.56                     | 91.11                 |
| 20177              | Shawnee, KS               | -0.049               | 33.78                     | 50.99                 |
| 20179              | Sheridan, KS              | -0.118               | 10.28                     | 6.85                  |
| 20181              | Sherman, KS               | -0.038               | 39.1                      | 49.84                 |
| 20183              | Smith, KS                 | -0.162               | 3.76                      | 5.03                  |

| County FIPS | County Description | DOS-SVI Index | DOS-SVI Percentile | SVI Percentile |
|-------------|--------------------|---------------|--------------------|----------------|
| 20185       | Stafford, KS       | -0.047        | 34.58              | 27.77          |
| 20187       | Stanton, KS        | -0.04         | 38.2               | 49.65          |
| 20189       | Stevens, KS        | -0.038        | 39.22              | 67.39          |
| 20191       | Sumner, KS         | -0.002        | 54.51              | 22.23          |
| 20193       | Thomas, KS         | -0.005        | 53.36              | 7.04           |
| 20195       | Trego, KS          | -0.256        | 0.6                | 3.89           |
| 20197       | Wabaunsee, KS      | 0.025         | 66.19              | 5.32           |
| 20199       | Wallace, KS        | -0.079        | 21.49              | 14.3           |
| 20201       | Washington, KS     | -0.062        | 28.3               | 14.81          |
| 20203       | Wichita, KS        | -0.027        | 43.62              | 46.78          |
| 20205       | Wilson, KS         | 0.025         | 66.32              | 63.66          |
| 20207       | Woodson, KS        | 0.005         | 57.66              | 43.98          |
| 20209       | Wyandotte, KS      | -0.099        | 14.93              | 92.42          |
| 21001       | Adair, KY          | 0.16          | 94.05              | 71.21          |
| 21003       | Allen, KY          | 0.06          | 77.68              | 67.96          |
| 21005       | Anderson, KY       | 0.036         | 71.09              | 26.37          |
| 21007       | Ballard, KY        | 0.009         | 59.5               | 44.59          |
| 21009       | Barren, KY         | 0.053         | 76.06              | 77.61          |
| 21011       | Bath, KY           | 0.098         | 86.5               | 72.9           |
| 21013       | Bell, KY           | 0.12          | 90.26              | 89.27          |
| 21015       | Boone, KY          | -0.089        | 17.41              | 12.77          |
| 21017       | Bourbon, KY        | -0.069        | 25.34              | 55.61          |
| 21019       | Boyd, KY           | -0.006        | 52.4               | 69.08          |
| 21021       | Boyle, KY          | 0.015         | 61.95              | 43.15          |
| 21023       | Bracken, KY        | 0.12          | 90.32              | 38.66          |
| 21025       | Breathitt, KY      | 0.272         | 98.03              | 82.2           |
| 21027       | Breckinridge, KY   | 0.192         | 95.96              | 73.76          |
| 21029       | Bullitt, KY        | -0.023        | 45.15              | 13.85          |
| 21031       | Butler, KY         | 0.046         | 74.08              | 79.2           |
| 21033       | Caldwell, KY       | 0.027         | 67.46              | 49.81          |
| 21035       | Calloway, KY       | 0.028         | 67.72              | 49.97          |
| 21037       | Campbell, KY       | -0.052        | 32.66              | 21.88          |
| 21039       | Carlisle, KY       | 0.025         | 66.03              | 33.95          |
| 21041       | Carroll, KY        | 0.222         | 97.07              | 89.04          |
| 21043       | Carter, KY         | 0.103         | 87.46              | 82.04          |
| 21045       | Casey, KY          | 0.106         | 88                 | 76.56          |
| 21047       | Christian, KY      | 0.122         | 90.77              | 91.27          |
| 21049       | Clark, KY          | -0.033        | 41.42              | 60.61          |
| 21051       | Clay, KY           | 0.292         | 98.31              | 90.99          |
| 21053       | Clinton, KY        | 0.121         | 90.64              | 77.8           |
| 21055       | Crittenden, KY     | 0.033         | 69.91              | 48.44          |
| 21057       | Cumberland, KY     | 0.076         | 82.11              | 53.15          |
| 21059       | Daviess, KY        | 0.005         | 57.59              | 61.69          |
| 21061       | Edmonson, KY       | 0.101         | 86.98              | 63.57          |
| 21063       | Elliott, KY        | 0.128         | 91.31              | 72.39          |
| 21065       | Estill, KY         | 0.102         | 87.2               | 79.97          |
| 21067       | Fayette, KY        | -0.121        | 9.74               | 48.76          |
| 21069       | Fleming, KY        | 0.107         | 88.32              | 77.1           |
| 21071       | Floyd, KY          | 0.16          | 94.02              | 85.03          |
| 21073       | Franklin, KY       | -0.054        | 32.12              | 54.68          |
| 21075       | Fulton, KY         | -0.043        | 36.68              | 87.04          |
| 21077       | Gallatin, KY       | 0.111         | 89.05              | 61.24          |
| 21079       | Garrard, KY        | 0.023         | 65.62              | 42.99          |
| 21081       | Grant, KY          | 0.147         | 93.28              | 56.02          |
| 21083       | Graves, KY         | 0.077         | 82.33              | 77.52          |

| <b>County FIPS</b> | <b>County Description</b> | <b>DOS-SVI Index</b> | <b>DOS-SVI Percentile</b> | <b>SVI Percentile</b> |
|--------------------|---------------------------|----------------------|---------------------------|-----------------------|
| 21085              | Grayson, KY               | 0.07                 | 80.55                     | 60.96                 |
| 21087              | Green, KY                 | -0.01                | 50.72                     | 52.26                 |
| 21089              | Greenup, KY               | -0.001               | 55.24                     | 32.17                 |
| 21091              | Hancock, KY               | 0.027                | 67.11                     | 38.22                 |
| 21093              | Hardin, KY                | -0.001               | 55.33                     | 56.72                 |
| 21095              | Harlan, KY                | 0.146                | 93.16                     | 88.03                 |
| 21097              | Harrison, KY              | 0.052                | 75.55                     | 50.57                 |
| 21099              | Hart, KY                  | 0.143                | 92.84                     | 76.59                 |
| 21101              | Henderson, KY             | -0.047               | 34.77                     | 70.89                 |
| 21103              | Henry, KY                 | 0.03                 | 68.35                     | 52.74                 |
| 21105              | Hickman, KY               | 0.006                | 58.1                      | 57.39                 |
| 21107              | Hopkins, KY               | -0.002               | 54.92                     | 55.41                 |
| 21109              | Jackson, KY               | 0.088                | 84.34                     | 66.62                 |
| 21111              | Jefferson, KY             | -0.096               | 15.57                     | 56.82                 |
| 21113              | Jessamine, KY             | -0.036               | 40.15                     | 52.01                 |
| 21115              | Johnson, KY               | 0.171                | 94.59                     | 81.02                 |
| 21117              | Kenton, KY                | -0.046               | 35.21                     | 33.79                 |
| 21119              | Knott, KY                 | 0.348                | 98.76                     | 85.48                 |
| 21121              | Knox, KY                  | 0.105                | 87.78                     | 83.25                 |
| 21123              | Larue, KY                 | -0.034               | 40.97                     | 53.18                 |
| 21125              | Laurel, KY                | 0.12                 | 90.48                     | 75.22                 |
| 21127              | Lawrence, KY              | 0.221                | 97.01                     | 75.83                 |
| 21129              | Lee, KY                   | 0.101                | 87.07                     | 81.82                 |
| 21131              | Leslie, KY                | 0.286                | 98.19                     | 77.45                 |
| 21133              | Letcher, KY               | 0.14                 | 92.42                     | 87.55                 |
| 21135              | Lewis, KY                 | 0.052                | 75.87                     | 62.42                 |
| 21137              | Lincoln, KY               | 0.127                | 91.28                     | 70.83                 |
| 21139              | Livingston, KY            | 0.063                | 78.92                     | 26.4                  |
| 21141              | Logan, KY                 | 0.013                | 61.06                     | 52.87                 |
| 21143              | Lyon, KY                  | 0.072                | 81.31                     | 32.52                 |
| 21145              | McCracken, KY             | -0.072               | 24                        | 41.53                 |
| 21147              | McCreary, KY              | 0.348                | 98.73                     | 87.8                  |
| 21149              | McLean, KY                | 0.064                | 79.08                     | 42.17                 |
| 21151              | Madison, KY               | 0.012                | 60.87                     | 49.68                 |
| 21153              | Magoffin, KY              | 0.302                | 98.44                     | 80.57                 |
| 21155              | Marion, KY                | 0.118                | 90.03                     | 90.57                 |
| 21157              | Marshall, KY              | 0.031                | 69.02                     | 27.23                 |
| 21159              | Martin, KY                | 0.339                | 98.66                     | 84.94                 |
| 21161              | Mason, KY                 | -0.002               | 54.63                     | 66.82                 |
| 21163              | Meade, KY                 | 0.142                | 92.74                     | 31.78                 |
| 21165              | Menifee, KY               | 0.087                | 84.14                     | 58.47                 |
| 21167              | Mercer, KY                | 0.024                | 65.78                     | 41.34                 |
| 21169              | Metcalfe, KY              | 0.011                | 60.46                     | 68.12                 |
| 21171              | Monroe, KY                | 0.066                | 79.66                     | 69.75                 |
| 21173              | Montgomery, KY            | 0.065                | 79.4                      | 79.87                 |
| 21175              | Morgan, KY                | 0.158                | 93.92                     | 82.93                 |
| 21177              | Muhlenberg, KY            | 0.079                | 82.78                     | 61.34                 |
| 21179              | Nelson, KY                | 0.049                | 74.82                     | 28.95                 |
| 21181              | Nicholas, KY              | 0.176                | 94.91                     | 81.97                 |
| 21183              | Ohio, KY                  | 0.06                 | 77.62                     | 57.99                 |
| 21185              | Oldham, KY                | 0.019                | 63.74                     | 3.95                  |
| 21187              | Owen, KY                  | 0.151                | 93.5                      | 52.64                 |
| 21189              | Owsley, KY                | 0.064                | 79.24                     | 84.14                 |
| 21191              | Pendleton, KY             | 0.027                | 67.02                     | 41.5                  |
| 21193              | Perry, KY                 | 0.215                | 96.78                     | 90.51                 |

| County FIPS | County Description   | DOS-SVI Index | DOS-SVI Percentile | SVI Percentile |
|-------------|----------------------|---------------|--------------------|----------------|
| 21195       | Pike, KY             | 0.093         | 85.39              | 79.08          |
| 21197       | Powell, KY           | 0.18          | 95.22              | 77.32          |
| 21199       | Pulaski, KY          | 0.026         | 66.57              | 74.2           |
| 21201       | Robertson, KY        | -0.066        | 26.62              | 35.38          |
| 21203       | Rockcastle, KY       | 0.095         | 85.7               | 78.82          |
| 21205       | Rowan, KY            | 0.139         | 92.26              | 75.57          |
| 21207       | Russell, KY          | 0.129         | 91.37              | 86.34          |
| 21209       | Scott, KY            | 0.021         | 64.56              | 33.31          |
| 21211       | Shelby, KY           | 0.015         | 62.02              | 42.61          |
| 21213       | Simpson, KY          | -0.06         | 29.32              | 28.79          |
| 21215       | Spencer, KY          | -0.031        | 42.02              | 3.69           |
| 21217       | Taylor, KY           | -0.024        | 44.57              | 72.1           |
| 21219       | Todd, KY             | 0.177         | 94.94              | 80.92          |
| 21221       | Trigg, KY            | 0.046         | 74.05              | 36.5           |
| 21223       | Trimble, KY          | 0.131         | 91.56              | 71.43          |
| 21225       | Union, KY            | 0.081         | 83.44              | 53.66          |
| 21227       | Warren, KY           | -0.003        | 54.41              | 70.96          |
| 21229       | Washington, KY       | 0.055         | 76.63              | 51.27          |
| 21231       | Wayne, KY            | 0.134         | 91.82              | 74.78          |
| 21233       | Webster, KY          | 0.074         | 81.89              | 78.54          |
| 21235       | Whitley, KY          | 0.181         | 95.35              | 83.79          |
| 21237       | Wolfe, KY            | 0.228         | 97.23              | 86.21          |
| 21239       | Woodford, KY         | -0.123        | 9.46               | 20.41          |
| 22001       | Acadia, LA           | 0.091         | 85.1               | 91.82          |
| 22003       | Allen, LA            | 0.297         | 98.38              | 92.61          |
| 22005       | Ascension, LA        | 0.02          | 64.02              | 39.68          |
| 22007       | Assumption, LA       | -0.006        | 52.66              | 77.9           |
| 22009       | Avoyelles, LA        | 0.11          | 88.98              | 96.34          |
| 22011       | Beauregard, LA       | 0.099         | 86.69              | 65.19          |
| 22013       | Bienville, LA        | 0.06          | 77.65              | 94.01          |
| 22015       | Bossier, LA          | -0.019        | 46.64              | 58.76          |
| 22017       | Caddo, LA            | -0.087        | 18.11              | 83.85          |
| 22019       | Calcasieu, LA        | -0.01         | 50.65              | 73.92          |
| 22021       | Caldwell, LA         | 0.22          | 96.94              | 93.31          |
| 22023       | Cameron, LA          | 0.092         | 85.13              | 26.43          |
| 22025       | Catahoula, LA        | 0.098         | 86.47              | 78.06          |
| 22027       | Claiborne, LA        | 0.053         | 76                 | 94.78          |
| 22029       | Concordia, LA        | 0.162         | 94.17              | 91.34          |
| 22031       | De Soto, LA          | 0.049         | 74.56              | 89.17          |
| 22033       | East Baton Rouge, LA | -0.142        | 6.02               | 66.53          |
| 22035       | East Carroll, LA     | 0.389         | 99.11              | 93.57          |
| 22037       | East Feliciana, LA   | 0.2           | 96.31              | 81.85          |
| 22039       | Evangeline, LA       | 0.126         | 91.18              | 99.75          |
| 22041       | Franklin, LA         | 0.103         | 87.36              | 95.19          |
| 22043       | Grant, LA            | 0.178         | 95                 | 62.74          |
| 22045       | Iberia, LA           | 0.079         | 82.87              | 96.05          |
| 22047       | Iberville, LA        | 0.085         | 83.89              | 88.6           |
| 22049       | Jackson, LA          | 0.023         | 65.71              | 93.82          |
| 22051       | Jefferson, LA        | -0.207        | 1.47               | 61.21          |
| 22053       | Jefferson Davis, LA  | 0.09          | 84.81              | 81.05          |
| 22055       | Lafayette, LA        | -0.064        | 27.83              | 62.17          |
| 22057       | Lafourche, LA        | -0.002        | 54.54              | 76.69          |
| 22059       | LaSalle, LA          | 0.056         | 76.95              | 76.34          |
| 22061       | Lincoln, LA          | 0.019         | 63.71              | 84.78          |
| 22063       | Livingston, LA       | 0.074         | 81.82              | 43.09          |

| <b>County FIPS</b> | <b>County Description</b> | <b>DOS-SVI Index</b> | <b>DOS-SVI Percentile</b> | <b>SVI Percentile</b> |
|--------------------|---------------------------|----------------------|---------------------------|-----------------------|
| 22065              | Madison, LA               | 0.182                | 95.42                     | 96.97                 |
| 22067              | Morehouse, LA             | 0.04                 | 72.43                     | 88.47                 |
| 22069              | Natchitoches, LA          | 0.067                | 79.78                     | 85.73                 |
| 22071              | Orleans, LA               | -0.079               | 21.36                     | 74.49                 |
| 22073              | Ouachita, LA              | 0.034                | 70.42                     | 85.22                 |
| 22075              | Plaquemines, LA           | -0.036               | 40.02                     | 70.61                 |
| 22077              | Pointe Coupee, LA         | 0.096                | 86.15                     | 84.75                 |
| 22079              | Rapides, LA               | -0.005               | 53.42                     | 90.86                 |
| 22081              | Red River, LA             | 0.032                | 69.79                     | 81.37                 |
| 22083              | Richland, LA              | 0.005                | 57.43                     | 85.54                 |
| 22085              | Sabine, LA                | 0.133                | 91.75                     | 83.15                 |
| 22087              | St. Bernard, LA           | 0.019                | 63.77                     | 77.13                 |
| 22089              | St. Charles, LA           | -0.03                | 42.57                     | 35.29                 |
| 22091              | St. Helena, LA            | 0.09                 | 84.66                     | 90                    |
| 22093              | St. James, LA             | 0.074                | 81.76                     | 62.99                 |
| 22095              | St. John the Baptist, LA  | -0.048               | 34.26                     | 74.68                 |
| 22097              | St. Landry, LA            | 0.054                | 76.28                     | 92.2                  |
| 22099              | St. Martin, LA            | 0.059                | 77.52                     | 78.31                 |
| 22101              | St. Mary, LA              | 0.026                | 66.86                     | 91.62                 |
| 22103              | St. Tammany, LA           | -0.081               | 20.44                     | 31.05                 |
| 22105              | Tangipahoa, LA            | 0.041                | 72.84                     | 88.85                 |
| 22107              | Tensas, LA                | 0.137                | 92.04                     | 83.66                 |
| 22109              | Terrebonne, LA            | 0.022                | 65.04                     | 89.52                 |
| 22111              | Union, LA                 | 0.11                 | 88.92                     | 80.8                  |
| 22113              | Vermilion, LA             | 0.135                | 91.98                     | 82.01                 |
| 22115              | Vernon, LA                | 0.111                | 89.11                     | 74.33                 |
| 22117              | Washington, LA            | 0.093                | 85.36                     | 99.62                 |
| 22119              | Webster, LA               | -0.005               | 53.26                     | 87.9                  |
| 22121              | West Baton Rouge, LA      | 0.002                | 56.26                     | 76.11                 |
| 22123              | West Carroll, LA          | 0.026                | 66.48                     | 66.85                 |
| 22125              | West Feliciana, LA        | 0.089                | 84.59                     | 69.01                 |
| 22127              | Winn, LA                  | 0.048                | 74.31                     | 77.55                 |
| 23001              | Androscoggin, ME          | -0.008               | 51.38                     | 55.67                 |
| 23003              | Aroostook, ME             | -0.037               | 39.7                      | 59.46                 |
| 23005              | Cumberland, ME            | -0.078               | 21.59                     | 13.63                 |
| 23007              | Franklin, ME              | -0.017               | 48.04                     | 21.5                  |
| 23009              | Hancock, ME               | -0.032               | 41.61                     | 19.3                  |
| 23011              | Kennebec, ME              | -0.001               | 54.98                     | 37.87                 |
| 23013              | Knox, ME                  | -0.065               | 27.35                     | 14.75                 |
| 23015              | Lincoln, ME               | -0.139               | 6.43                      | 11.43                 |
| 23017              | Oxford, ME                | -0.035               | 40.47                     | 37.26                 |
| 23019              | Penobscot, ME             | 0.009                | 59.34                     | 45.32                 |
| 23021              | Piscataquis, ME           | -0.06                | 29.35                     | 48.98                 |
| 23023              | Sagadahoc, ME             | -0.12                | 10                        | 5.22                  |
| 23025              | Somerset, ME              | 0.06                 | 77.75                     | 62.2                  |
| 23027              | Waldo, ME                 | -0.012               | 49.95                     | 21.97                 |
| 23029              | Washington, ME            | -0.046               | 35.66                     | 64.39                 |
| 23031              | York, ME                  | -0.069               | 25.37                     | 9.36                  |
| 24001              | Allegany, MD              | 0.058                | 77.43                     | 62.1                  |
| 24003              | Anne Arundel, MD          | -0.131               | 8.12                      | 17.83                 |
| 24005              | Baltimore, MD             | -0.205               | 1.62                      | 38.18                 |
| 24009              | Calvert, MD               | -0.091               | 16.84                     | 4.71                  |
| 24011              | Caroline, MD              | -0.055               | 31.68                     | 55.35                 |
| 24013              | Carroll, MD               | -0.065               | 27.16                     | 4.04                  |
| 24015              | Cecil, MD                 | -0.005               | 52.88                     | 29.33                 |



| <b>County FIPS</b> | <b>County Description</b> | <b>DOS-SVI Index</b> | <b>DOS-SVI Percentile</b> | <b>SVI Percentile</b> |
|--------------------|---------------------------|----------------------|---------------------------|-----------------------|
| 24017              | Charles, MD               | -0.173               | 2.99                      | 17.23                 |
| 24019              | Dorchester, MD            | -0.132               | 7.74                      | 75.06                 |
| 24021              | Frederick, MD             | -0.131               | 8.09                      | 15.89                 |
| 24023              | Garrett, MD               | -0.05                | 33.33                     | 18.12                 |
| 24025              | Harford, MD               | -0.11                | 12.35                     | 9.33                  |
| 24027              | Howard, MD                | -0.198               | 1.82                      | 13.06                 |
| 24029              | Kent, MD                  | -0.141               | 6.18                      | 42.77                 |
| 24031              | Montgomery, MD            | -0.252               | 0.64                      | 32.55                 |
| 24033              | Prince George's, MD       | -0.235               | 0.83                      | 62.61                 |
| 24035              | Queen Anne's, MD          | -0.092               | 16.62                     | 2.2                   |
| 24037              | St. Mary's, MD            | -0.075               | 22.67                     | 20.86                 |
| 24039              | Somerset, MD              | 0.056                | 77.01                     | 89.78                 |
| 24041              | Talbot, MD                | -0.266               | 0.51                      | 13.31                 |
| 24043              | Washington, MD            | -0.023               | 45.11                     | 61.4                  |
| 24045              | Wicomico, MD              | -0.041               | 37.7                      | 77.39                 |
| 24047              | Worcester, MD             | -0.315               | 0.16                      | 28.03                 |
| 24510              | Baltimore City, MD        | 0.01                 | 60.08                     | 83.12                 |
| 25001              | Barnstable, MA            | -0.182               | 2.55                      | 5.64                  |
| 25003              | Berkshire, MA             | -0.117               | 10.76                     | 40.83                 |
| 25005              | Bristol, MA               | -0.124               | 9.17                      | 52.48                 |
| 25007              | Dukes, MA                 | -0.149               | 5.29                      | 0.96                  |
| 25009              | Essex, MA                 | -0.158               | 4.27                      | 50.8                  |
| 25011              | Franklin, MA              | -0.107               | 12.83                     | 20.96                 |
| 25013              | Hampden, MA               | -0.128               | 8.6                       | 82.32                 |
| 25015              | Hampshire, MA             | -0.016               | 48.11                     | 23.25                 |
| 25017              | Middlesex, MA             | -0.129               | 8.47                      | 22.64                 |
| 25019              | Nantucket, MA             | -0.09                | 17.16                     | 2.68                  |
| 25021              | Norfolk, MA               | -0.129               | 8.37                      | 20.92                 |
| 25023              | Plymouth, MA              | -0.118               | 10.38                     | 23.03                 |
| 25025              | Suffolk, MA               | -0.076               | 22.41                     | 73.79                 |
| 25027              | Worcester, MA             | -0.069               | 25.15                     | 40.96                 |
| 26001              | Alcona, MI                | -0.139               | 6.69                      | 25.57                 |
| 26003              | Alger, MI                 | 0.028                | 67.65                     | 44.81                 |
| 26005              | Allegan, MI               | 0.028                | 67.78                     | 17.58                 |
| 26007              | Alpena, MI                | -0.071               | 24.55                     | 34.08                 |
| 26009              | Antrim, MI                | -0.092               | 16.68                     | 11.56                 |
| 26011              | Arenac, MI                | -0.015               | 48.65                     | 50.54                 |
| 26013              | Baraga, MI                | 0.094                | 85.67                     | 65.99                 |
| 26015              | Barry, MI                 | 0.006                | 58.26                     | 8.69                  |
| 26017              | Bay, MI                   | -0.084               | 19.13                     | 44.04                 |
| 26019              | Benzie, MI                | -0.072               | 23.88                     | 10.51                 |
| 26021              | Berrien, MI               | -0.05                | 33.65                     | 64.75                 |
| 26023              | Branch, MI                | 0.023                | 65.39                     | 63.15                 |
| 26025              | Calhoun, MI               | -0.075               | 22.54                     | 72.42                 |
| 26027              | Cass, MI                  | -0.022               | 45.56                     | 32.8                  |
| 26029              | Charlevoix, MI            | -0.105               | 13.5                      | 9.68                  |
| 26031              | Cheboygan, MI             | -0.074               | 23.3                      | 28.6                  |
| 26033              | Chippewa, MI              | 0.012                | 60.97                     | 72.45                 |
| 26035              | Clare, MI                 | 0.072                | 81.34                     | 77.2                  |
| 26037              | Clinton, MI               | -0.078               | 21.75                     | 4.01                  |
| 26039              | Crawford, MI              | -0.037               | 39.83                     | 36.97                 |
| 26041              | Delta, MI                 | -0.056               | 31.36                     | 35.45                 |
| 26043              | Dickinson, MI             | -0.047               | 35.08                     | 22.96                 |
| 26045              | Eaton, MI                 | -0.101               | 14.33                     | 31.31                 |
| 26047              | Emmet, MI                 | -0.083               | 19.39                     | 13.57                 |

| <b>County FIPS</b> | <b>County Description</b> | <b>DOS-SVI Index</b> | <b>DOS-SVI Percentile</b> | <b>SVI Percentile</b> |
|--------------------|---------------------------|----------------------|---------------------------|-----------------------|
| 26049              | Genesee, MI               | -0.063               | 28.27                     | 66.24                 |
| 26051              | Gladwin, MI               | 0.001                | 55.78                     | 53.98                 |
| 26053              | Gogebic, MI               | -0.035               | 40.66                     | 40.38                 |
| 26055              | Grand Traverse, MI        | -0.042               | 37.25                     | 18.03                 |
| 26057              | Gratiot, MI               | 0.04                 | 72.3                      | 60.35                 |
| 26059              | Hillsdale, MI             | 0.052                | 75.71                     | 50.19                 |
| 26061              | Houghton, MI              | 0.129                | 91.4                      | 49.62                 |
| 26063              | Huron, MI                 | -0.053               | 32.35                     | 27.45                 |
| 26065              | Ingham, MI                | -0.058               | 30.5                      | 57.42                 |
| 26067              | Ionia, MI                 | 0.076                | 82.2                      | 47.8                  |
| 26069              | Iosco, MI                 | -0.086               | 18.5                      | 44.94                 |
| 26071              | Iron, MI                  | -0.113               | 11.75                     | 28.25                 |
| 26073              | Isabella, MI              | 0.007                | 58.58                     | 60.16                 |
| 26075              | Jackson, MI               | -0.015               | 48.49                     | 55.06                 |
| 26077              | Kalamazoo, MI             | -0.083               | 19.48                     | 40.7                  |
| 26079              | Kalkaska, MI              | 0.045                | 73.93                     | 50.83                 |
| 26081              | Kent, MI                  | -0.073               | 23.81                     | 47.61                 |
| 26083              | Keweenaw, MI              | -0.155               | 4.58                      | 7.87                  |
| 26085              | Lake, MI                  | 0.073                | 81.5                      | 78.18                 |
| 26087              | Lapeer, MI                | 0.012                | 60.71                     | 23.82                 |
| 26089              | Leelanau, MI              | -0.14                | 6.3                       | 2.45                  |
| 26091              | Lenawee, MI               | -0.042               | 37.38                     | 40.76                 |
| 26093              | Livingston, MI            | -0.04                | 38.3                      | 0.67                  |
| 26095              | Luce, MI                  | 0.074                | 81.69                     | 53.38                 |
| 26097              | Mackinac, MI              | -0.019               | 46.96                     | 64.52                 |
| 26099              | Macomb, MI                | -0.09                | 17.22                     | 32.96                 |
| 26101              | Manistee, MI              | -0.001               | 55.11                     | 39.97                 |
| 26103              | Marquette, MI             | -0.021               | 45.94                     | 30.57                 |
| 26105              | Mason, MI                 | -0.069               | 24.99                     | 33.76                 |
| 26107              | Mecosta, MI               | 0.071                | 80.96                     | 59.75                 |
| 26109              | Menominee, MI             | -0.065               | 26.87                     | 27.64                 |
| 26111              | Midland, MI               | -0.03                | 42.47                     | 16.18                 |
| 26113              | Missaukee, MI             | 0.091                | 85.04                     | 47.55                 |
| 26115              | Monroe, MI                | -0.041               | 37.54                     | 14.94                 |
| 26117              | Montcalm, MI              | 0.037                | 71.51                     | 61.27                 |
| 26119              | Montmorency, MI           | -0.046               | 35.63                     | 37.29                 |
| 26121              | Muskegon, MI              | -0.003               | 54.38                     | 70.35                 |
| 26123              | Newaygo, MI               | 0.063                | 78.99                     | 63.18                 |
| 26125              | Oakland, MI               | -0.139               | 6.4                       | 11.4                  |
| 26127              | Oceana, MI                | 0.095                | 85.8                      | 85.8                  |
| 26129              | Ogemaw, MI                | 0.01                 | 60.05                     | 62.58                 |
| 26131              | Ontonagon, MI             | -0.097               | 15.51                     | 27.32                 |
| 26133              | Osceola, MI               | 0.078                | 82.52                     | 74.01                 |
| 26135              | Oscoda, MI                | 0.05                 | 75.01                     | 66.94                 |
| 26137              | Otsego, MI                | 0.003                | 56.57                     | 36.94                 |
| 26139              | Ottawa, MI                | -0.004               | 53.58                     | 21.72                 |
| 26141              | Presque Isle, MI          | -0.087               | 17.99                     | 27.61                 |
| 26143              | Roscommon, MI             | -0.079               | 21.11                     | 46.27                 |
| 26145              | Saginaw, MI               | -0.071               | 24.71                     | 70.48                 |
| 26147              | St. Clair, MI             | -0.041               | 37.89                     | 27.9                  |
| 26149              | St. Joseph, MI            | 0.017                | 62.81                     | 65.16                 |
| 26151              | Sanilac, MI               | 0                    | 55.68                     | 48.34                 |
| 26153              | Schoolcraft, MI           | -0.062               | 28.72                     | 54.52                 |
| 26155              | Shiawassee, MI            | -0.054               | 31.96                     | 13.25                 |
| 26157              | Tuscola, MI               | 0.037                | 71.47                     | 39.59                 |

| <b>County FIPS</b> | <b>County Description</b> | <b>DOS-SVI Index</b> | <b>DOS-SVI Percentile</b> | <b>SVI Percentile</b> |
|--------------------|---------------------------|----------------------|---------------------------|-----------------------|
| 26159              | Van Buren, MI             | 0.027                | 67.43                     | 65.89                 |
| 26161              | Washtenaw, MI             | -0.077               | 22.13                     | 22.36                 |
| 26163              | Wayne, MI                 | -0.062               | 28.46                     | 87.23                 |
| 26165              | Wexford, MI               | 0.019                | 63.58                     | 50.35                 |
| 27001              | Aitkin, MN                | -0.1                 | 14.71                     | 30.83                 |
| 27003              | Anoka, MN                 | -0.078               | 21.87                     | 14.04                 |
| 27005              | Becker, MN                | -0.034               | 41.13                     | 29.9                  |
| 27007              | Beltrami, MN              | 0.026                | 66.76                     | 77.71                 |
| 27009              | Benton, MN                | -0.043               | 36.74                     | 43.18                 |
| 27011              | Big Stone, MN             | -0.099               | 14.96                     | 20.06                 |
| 27013              | Blue Earth, MN            | -0.072               | 24.04                     | 28.38                 |
| 27015              | Brown, MN                 | -0.11                | 12.45                     | 12.74                 |
| 27017              | Carlton, MN               | 0.019                | 63.55                     | 26.66                 |
| 27019              | Carver, MN                | -0.032               | 41.64                     | 1.24                  |
| 27021              | Cass, MN                  | -0.041               | 37.57                     | 35                    |
| 27023              | Chippewa, MN              | -0.122               | 9.55                      | 35.22                 |
| 27025              | Chisago, MN               | -0.01                | 50.62                     | 5.92                  |
| 27027              | Clay, MN                  | -0.045               | 35.75                     | 22.17                 |
| 27029              | Clearwater, MN            | 0.076                | 82.27                     | 79.17                 |
| 27031              | Cook, MN                  | 0.084                | 83.7                      | 20.29                 |
| 27033              | Cottonwood, MN            | -0.029               | 42.92                     | 47.26                 |
| 27035              | Crow Wing, MN             | -0.105               | 13.4                      | 12.23                 |
| 27037              | Dakota, MN                | -0.157               | 4.36                      | 12.07                 |
| 27039              | Dodge, MN                 | -0.074               | 23.43                     | 5.73                  |
| 27041              | Douglas, MN               | -0.126               | 8.98                      | 4.46                  |
| 27043              | Faribault, MN             | -0.12                | 9.96                      | 15.7                  |
| 27045              | Fillmore, MN              | -0.005               | 53.04                     | 21.69                 |
| 27047              | Freeborn, MN              | -0.169               | 3.25                      | 43.28                 |
| 27049              | Goodhue, MN               | -0.074               | 23.24                     | 17.07                 |
| 27051              | Grant, MN                 | -0.107               | 12.86                     | 9.46                  |
| 27053              | Hennepin, MN              | -0.155               | 4.46                      | 30.92                 |
| 27055              | Houston, MN               | -0.085               | 18.56                     | 1.85                  |
| 27057              | Hubbard, MN               | -0.028               | 43.3                      | 20.51                 |
| 27059              | Isanti, MN                | -0.041               | 37.98                     | 10.22                 |
| 27061              | Itasca, MN                | 0.005                | 57.78                     | 32.93                 |
| 27063              | Jackson, MN               | -0.097               | 15.35                     | 3.06                  |
| 27065              | Kanabec, MN               | 0                    | 55.75                     | 28.41                 |
| 27067              | Kandiyohi, MN             | -0.083               | 19.52                     | 40.64                 |
| 27069              | Kittson, MN               | -0.049               | 33.94                     | 9.97                  |
| 27071              | Koochiching, MN           | -0.107               | 12.96                     | 43.66                 |
| 27073              | Lac qui Parle, MN         | -0.147               | 5.63                      | 10.06                 |
| 27075              | Lake, MN                  | -0.091               | 16.97                     | 11.02                 |
| 27077              | Lake of the Woods, MN     | -0.027               | 43.65                     | 15.76                 |
| 27079              | Le Sueur, MN              | -0.043               | 36.99                     | 11.46                 |
| 27081              | Lincoln, MN               | -0.082               | 19.96                     | 6.66                  |
| 27083              | Lyon, MN                  | -0.038               | 39.19                     | 45.32                 |
| 27085              | McLeod, MN                | -0.133               | 7.67                      | 12.61                 |
| 27087              | Mahnomen, MN              | 0.03                 | 68.26                     | 87.17                 |
| 27089              | Marshall, MN              | -0.065               | 26.84                     | 14.11                 |
| 27091              | Martin, MN                | -0.147               | 5.67                      | 19.33                 |
| 27093              | Meeker, MN                | -0.005               | 53.17                     | 18.69                 |
| 27095              | Mille Lacs, MN            | -0.008               | 51.86                     | 59.17                 |
| 27097              | Morrison, MN              | -0.019               | 46.61                     | 26.82                 |
| 27099              | Mower, MN                 | -0.075               | 22.92                     | 62.83                 |
| 27101              | Murray, MN                | -0.132               | 7.7                       | 10.64                 |

| <b>County FIPS</b> | <b>County Description</b> | <b>DOS-SVI Index</b> | <b>DOS-SVI Percentile</b> | <b>SVI Percentile</b> |
|--------------------|---------------------------|----------------------|---------------------------|-----------------------|
| 27103              | Nicollet, MN              | -0.062               | 28.62                     | 25.13                 |
| 27105              | Nobles, MN                | -0.164               | 3.66                      | 81.5                  |
| 27107              | Norman, MN                | -0.014               | 49                        | 32.48                 |
| 27109              | Olmsted, MN               | -0.074               | 23.4                      | 25.99                 |
| 27111              | Otter Tail, MN            | -0.054               | 32                        | 20.99                 |
| 27113              | Pennington, MN            | -0.075               | 22.86                     | 30.16                 |
| 27115              | Pine, MN                  | 0.025                | 66.12                     | 46.31                 |
| 27117              | Pipestone, MN             | -0.081               | 20.54                     | 46.46                 |
| 27119              | Polk, MN                  | -0.045               | 35.91                     | 36.69                 |
| 27121              | Pope, MN                  | -0.083               | 19.45                     | 3.15                  |
| 27123              | Ramsey, MN                | -0.123               | 9.33                      | 63.34                 |
| 27125              | Red Lake, MN              | 0.006                | 57.94                     | 15.25                 |
| 27127              | Redwood, MN               | -0.107               | 13.09                     | 22.93                 |
| 27129              | Renville, MN              | -0.09                | 17.32                     | 19.68                 |
| 27131              | Rice, MN                  | 0.015                | 62.05                     | 39.3                  |
| 27133              | Rock, MN                  | -0.049               | 33.97                     | 15.32                 |
| 27135              | Roseau, MN                | -0.004               | 53.71                     | 24.78                 |
| 27137              | St. Louis, MN             | -0.033               | 41.45                     | 31.18                 |
| 27139              | Scott, MN                 | 0.024                | 65.81                     | 11.08                 |
| 27141              | Sherburne, MN             | -0.01                | 50.75                     | 8.85                  |
| 27143              | Sibley, MN                | -0.079               | 21.55                     | 13.15                 |
| 27145              | Stearns, MN               | -0.039               | 38.65                     | 38.85                 |
| 27147              | Steele, MN                | -0.013               | 49.54                     | 30.13                 |
| 27149              | Stevens, MN               | -0.055               | 31.71                     | 22.58                 |
| 27151              | Swift, MN                 | -0.134               | 7.45                      | 32.13                 |
| 27153              | Todd, MN                  | 0.043                | 73.45                     | 48.12                 |
| 27155              | Traverse, MN              | -0.118               | 10.51                     | 26.02                 |
| 27157              | Wabasha, MN               | -0.092               | 16.59                     | 5.89                  |
| 27159              | Wadena, MN                | 0.003                | 56.35                     | 65.54                 |
| 27161              | Waseca, MN                | -0.036               | 40.12                     | 25.03                 |
| 27163              | Washington, MN            | -0.091               | 16.78                     | 6.82                  |
| 27165              | Watonwan, MN              | -0.186               | 2.23                      | 51.91                 |
| 27167              | Wilkin, MN                | -0.072               | 24.32                     | 19.24                 |
| 27169              | Winona, MN                | -0.017               | 48.07                     | 21.15                 |
| 27171              | Wright, MN                | 0.028                | 67.84                     | 4.62                  |
| 27173              | Yellow Medicine, MN       | -0.106               | 13.12                     | 33.44                 |
| 28001              | Adams, MS                 | -0.106               | 13.28                     | 99.14                 |
| 28003              | Alcorn, MS                | 0.036                | 71.22                     | 69.55                 |
| 28005              | Amite, MS                 | 0                    | 55.46                     | 81.91                 |
| 28007              | Attala, MS                | 0.102                | 87.17                     | 98.44                 |
| 28009              | Benton, MS                | -0.003               | 54.09                     | 66.05                 |
| 28011              | Bolivar, MS               | -0.039               | 38.59                     | 96.75                 |
| 28013              | Calhoun, MS               | 0.049                | 74.69                     | 96.5                  |
| 28015              | Carroll, MS               | 0.123                | 90.89                     | 63.03                 |
| 28017              | Chickasaw, MS             | -0.017               | 47.98                     | 91.43                 |
| 28019              | Choctaw, MS               | 0.105                | 87.74                     | 85.41                 |
| 28021              | Claiborne, MS             | 0.187                | 95.77                     | 99.2                  |
| 28023              | Clarke, MS                | -0.044               | 36.42                     | 66.69                 |
| 28025              | Clay, MS                  | -0.092               | 16.71                     | 70.54                 |
| 28027              | Coahoma, MS               | 0.044                | 73.7                      | 93.22                 |
| 28029              | Copiah, MS                | 0.113                | 89.43                     | 94.11                 |
| 28031              | Covington, MS             | 0.07                 | 80.64                     | 78.79                 |
| 28033              | DeSoto, MS                | -0.024               | 44.73                     | 30.32                 |
| 28035              | Forrest, MS               | -0.011               | 50.21                     | 93.66                 |
| 28037              | Franklin, MS              | -0.003               | 54                        | 57.17                 |

| <b>County FIPS</b> | <b>County Description</b> | <b>DOS-SVI Index</b> | <b>DOS-SVI Percentile</b> | <b>SVI Percentile</b> |
|--------------------|---------------------------|----------------------|---------------------------|-----------------------|
| 28039              | George, MS                | 0.182                | 95.48                     | 61.37                 |
| 28041              | Greene, MS                | 0.334                | 98.63                     | 60.67                 |
| 28043              | Grenada, MS               | -0.036               | 40.24                     | 87.71                 |
| 28045              | Hancock, MS               | -0.064               | 27.44                     | 59.24                 |
| 28047              | Harrison, MS              | -0.043               | 36.96                     | 88.38                 |
| 28049              | Hinds, MS                 | -0.068               | 25.82                     | 87.42                 |
| 28051              | Holmes, MS                | 0.115                | 89.56                     | 98.18                 |
| 28053              | Humphreys, MS             | 0.103                | 87.39                     | 93.69                 |
| 28055              | Issaquena, MS             | 0.27                 | 97.99                     | 95.1                  |
| 28057              | Itawamba, MS              | 0.011                | 60.65                     | 54.87                 |
| 28059              | Jackson, MS               | -0.083               | 19.87                     | 54.33                 |
| 28061              | Jasper, MS                | -0.045               | 36.01                     | 76.91                 |
| 28063              | Jefferson, MS             | 0.081                | 83.19                     | 96.37                 |
| 28065              | Jefferson Davis, MS       | -0.001               | 55.14                     | 84.39                 |
| 28067              | Jones, MS                 | 0.018                | 63.01                     | 89.2                  |
| 28069              | Kemper, MS                | 0.036                | 70.93                     | 92.74                 |
| 28071              | Lafayette, MS             | -0.006               | 52.47                     | 50.96                 |
| 28073              | Lamar, MS                 | 0.022                | 65.01                     | 53.06                 |
| 28075              | Lauderdale, MS            | 0.007                | 58.77                     | 92.83                 |
| 28077              | Lawrence, MS              | 0.091                | 84.97                     | 66.34                 |
| 28079              | Leake, MS                 | 0.093                | 85.23                     | 99.46                 |
| 28081              | Lee, MS                   | 0.049                | 74.78                     | 79.52                 |
| 28083              | Leflore, MS               | 0.032                | 69.47                     | 96.53                 |
| 28085              | Lincoln, MS               | 0.062                | 78.48                     | 75.86                 |
| 28087              | Lowndes, MS               | -0.059               | 29.99                     | 79.75                 |
| 28089              | Madison, MS               | -0.112               | 11.94                     | 28.98                 |
| 28091              | Marion, MS                | 0.144                | 93                        | 93.5                  |
| 28093              | Marshall, MS              | -0.003               | 54.31                     | 69.04                 |
| 28095              | Monroe, MS                | 0.015                | 61.89                     | 63.98                 |
| 28097              | Montgomery, MS            | -0.097               | 15.41                     | 89.14                 |
| 28099              | Neshoba, MS               | 0.224                | 97.14                     | 96.85                 |
| 28101              | Newton, MS                | 0.094                | 85.64                     | 92.13                 |
| 28103              | Noxubee, MS               | 0.141                | 92.65                     | 98.6                  |
| 28105              | Oktibbeha, MS             | 0.037                | 71.6                      | 64.2                  |
| 28107              | Panola, MS                | 0.068                | 80.26                     | 89.33                 |
| 28109              | Pearl River, MS           | 0.07                 | 80.67                     | 70.51                 |
| 28111              | Perry, MS                 | 0.095                | 85.77                     | 70.86                 |
| 28113              | Pike, MS                  | 0                    | 55.72                     | 98.82                 |
| 28115              | Pontotoc, MS              | 0.149                | 93.41                     | 89.62                 |
| 28117              | Prentiss, MS              | 0.116                | 89.62                     | 85.13                 |
| 28119              | Quitman, MS               | 0.229                | 97.33                     | 95.45                 |
| 28121              | Rankin, MS                | 0.005                | 57.56                     | 31.27                 |
| 28123              | Scott, MS                 | 0.036                | 71.12                     | 98.5                  |
| 28125              | Sharkey, MS               | 0.253                | 97.77                     | 97.29                 |
| 28127              | Simpson, MS               | 0.151                | 93.57                     | 90.73                 |
| 28129              | Smith, MS                 | -0.001               | 55.3                      | 47.32                 |
| 28131              | Stone, MS                 | 0.172                | 94.65                     | 60.45                 |
| 28133              | Sunflower, MS             | 0.178                | 95.06                     | 94.94                 |
| 28135              | Tallahatchie, MS          | 0.189                | 95.83                     | 97.36                 |
| 28137              | Tate, MS                  | 0.164                | 94.33                     | 86.5                  |
| 28139              | Tippah, MS                | 0.103                | 87.33                     | 86.46                 |
| 28141              | Tishomingo, MS            | 0.099                | 86.63                     | 66.59                 |
| 28143              | Tunica, MS                | -0.046               | 35.4                      | 97.2                  |
| 28145              | Union, MS                 | 0.079                | 82.94                     | 82.77                 |
| 28147              | Walthall, MS              | 0.051                | 75.23                     | 86.11                 |

| <b>County FIPS</b> | <b>County Description</b> | <b>DOS-SVI Index</b> | <b>DOS-SVI Percentile</b> | <b>SVI Percentile</b> |
|--------------------|---------------------------|----------------------|---------------------------|-----------------------|
| 28149              | Warren, MS                | -0.032               | 41.93                     | 86.05                 |
| 28151              | Washington, MS            | 0.025                | 66.44                     | 97.83                 |
| 28153              | Wayne, MS                 | 0.056                | 76.98                     | 89.97                 |
| 28155              | Webster, MS               | -0.058               | 30.25                     | 59.62                 |
| 28157              | Wilkinson, MS             | 0.135                | 91.91                     | 91.69                 |
| 28159              | Winston, MS               | 0.026                | 66.51                     | 93.06                 |
| 28161              | Yalobusha, MS             | 0.056                | 76.89                     | 73.47                 |
| 28163              | Yazoo, MS                 | 0.17                 | 94.49                     | 99.52                 |
| 29001              | Adair, MO                 | 0.055                | 76.6                      | 45.48                 |
| 29003              | Andrew, MO                | 0.001                | 55.81                     | 3.25                  |
| 29005              | Atchison, MO              | -0.079               | 21.52                     | 7.36                  |
| 29007              | Audrain, MO               | 0.074                | 81.79                     | 61.5                  |
| 29009              | Barry, MO                 | 0.067                | 79.85                     | 70.99                 |
| 29011              | Barton, MO                | 0.051                | 75.49                     | 59.94                 |
| 29013              | Bates, MO                 | 0.057                | 77.05                     | 38.57                 |
| 29015              | Benton, MO                | 0.028                | 67.53                     | 55.13                 |
| 29017              | Bollinger, MO             | 0.063                | 78.86                     | 47.93                 |
| 29019              | Boone, MO                 | -0.024               | 44.54                     | 29.27                 |
| 29021              | Buchanan, MO              | -0.006               | 52.72                     | 71.82                 |
| 29023              | Butler, MO                | 0.032                | 69.56                     | 81.72                 |
| 29025              | Caldwell, MO              | 0.139                | 92.3                      | 45.13                 |
| 29027              | Callaway, MO              | 0.028                | 67.81                     | 32.32                 |
| 29029              | Camden, MO                | -0.166               | 3.63                      | 33.63                 |
| 29031              | Cape Girardeau, MO        | 0.01                 | 60.17                     | 41.18                 |
| 29033              | Carroll, MO               | 0.042                | 73.07                     | 53.25                 |
| 29035              | Carter, MO                | 0.111                | 89.24                     | 74.55                 |
| 29037              | Cass, MO                  | -0.024               | 44.44                     | 11.88                 |
| 29039              | Cedar, MO                 | 0.009                | 59.66                     | 64.11                 |
| 29041              | Chariton, MO              | 0.017                | 62.75                     | 18.98                 |
| 29043              | Christian, MO             | 0.031                | 69.18                     | 14.97                 |
| 29045              | Clark, MO                 | 0.007                | 58.61                     | 34.2                  |
| 29047              | Clay, MO                  | -0.093               | 16.49                     | 13.63                 |
| 29049              | Clinton, MO               | -0.057               | 30.79                     | 16.43                 |
| 29051              | Cole, MO                  | -0.047               | 34.61                     | 25.83                 |
| 29053              | Cooper, MO                | 0.047                | 74.24                     | 38.92                 |
| 29055              | Crawford, MO              | 0.08                 | 83.03                     | 75.54                 |
| 29057              | Dade, MO                  | 0.069                | 80.48                     | 66.37                 |
| 29059              | Dallas, MO                | 0.074                | 81.85                     | 70.19                 |
| 29061              | Daviess, MO               | 0.116                | 89.72                     | 47.07                 |
| 29063              | DeKalb, MO                | 0.222                | 97.04                     | 40.54                 |
| 29065              | Dent, MO                  | 0.058                | 77.46                     | 63.12                 |
| 29067              | Douglas, MO               | 0.07                 | 80.71                     | 52.32                 |
| 29069              | Dunklin, MO               | 0.017                | 62.78                     | 95.8                  |
| 29071              | Franklin, MO              | -0.017               | 47.63                     | 14.59                 |
| 29073              | Gasconade, MO             | -0.053               | 32.31                     | 8.54                  |
| 29075              | Gentry, MO                | 0.067                | 79.91                     | 43.89                 |
| 29077              | Greene, MO                | -0.033               | 41.23                     | 43.95                 |
| 29079              | Grundy, MO                | -0.003               | 54.44                     | 61.85                 |
| 29081              | Harrison, MO              | -0.038               | 39.45                     | 74.17                 |
| 29083              | Henry, MO                 | 0.038                | 71.63                     | 59.59                 |
| 29085              | Hickory, MO               | -0.046               | 35.47                     | 46.72                 |
| 29087              | Holt, MO                  | -0.044               | 36.29                     | 19.59                 |
| 29089              | Howard, MO                | 0.041                | 72.72                     | 40.41                 |
| 29091              | Howell, MO                | 0.048                | 74.34                     | 67.17                 |
| 29093              | Iron, MO                  | 0.093                | 85.42                     | 78.22                 |

| <b>County FIPS</b> | <b>County Description</b> | <b>DOS-SVI Index</b> | <b>DOS-SVI Percentile</b> | <b>SVI Percentile</b> |
|--------------------|---------------------------|----------------------|---------------------------|-----------------------|
| 29095              | Jackson, MO               | -0.131               | 8.05                      | 53.54                 |
| 29097              | Jasper, MO                | 0.016                | 62.5                      | 65.64                 |
| 29099              | Jefferson, MO             | -0.005               | 52.85                     | 18.63                 |
| 29101              | Johnson, MO               | 0.137                | 92.1                      | 35.06                 |
| 29103              | Knox, MO                  | -0.005               | 53.07                     | 55.7                  |
| 29105              | Laclede, MO               | 0.143                | 92.9                      | 61.78                 |
| 29107              | Lafayette, MO             | -0.002               | 54.76                     | 38.82                 |
| 29109              | Lawrence, MO              | 0.086                | 84.02                     | 78.66                 |
| 29111              | Lewis, MO                 | 0.109                | 88.63                     | 44.65                 |
| 29113              | Lincoln, MO               | 0.054                | 76.34                     | 29.39                 |
| 29115              | Linn, MO                  | -0.061               | 28.97                     | 27.2                  |
| 29117              | Livingston, MO            | 0.015                | 62.24                     | 37.48                 |
| 29119              | McDonald, MO              | 0.172                | 94.68                     | 86.31                 |
| 29121              | Macon, MO                 | -0.002               | 54.47                     | 58.6                  |
| 29123              | Madison, MO               | 0.121                | 90.67                     | 47.77                 |
| 29125              | Maries, MO                | 0.062                | 78.64                     | 51.18                 |
| 29127              | Marion, MO                | 0.009                | 59.41                     | 54.59                 |
| 29129              | Mercer, MO                | 0.072                | 81.38                     | 30.45                 |
| 29131              | Miller, MO                | 0.009                | 59.47                     | 50.1                  |
| 29133              | Mississippi, MO           | 0.105                | 87.97                     | 90.76                 |
| 29135              | Moniteau, MO              | 0.159                | 93.95                     | 51.43                 |
| 29137              | Monroe, MO                | -0.023               | 45.18                     | 38.76                 |
| 29139              | Montgomery, MO            | 0                    | 55.62                     | 53.31                 |
| 29141              | Morgan, MO                | -0.004               | 53.55                     | 62.9                  |
| 29143              | New Madrid, MO            | 0.012                | 60.68                     | 89.68                 |
| 29145              | Newton, MO                | 0.03                 | 68.8                      | 43.41                 |
| 29147              | Nodaway, MO               | 0.055                | 76.47                     | 22.2                  |
| 29149              | Oregon, MO                | -0.017               | 47.72                     | 48.85                 |
| 29151              | Osage, MO                 | 0.061                | 78.38                     | 4.97                  |
| 29153              | Ozark, MO                 | 0.04                 | 72.27                     | 58.25                 |
| 29155              | Pemiscot, MO              | 0.066                | 79.62                     | 93.03                 |
| 29157              | Perry, MO                 | 0.026                | 66.7                      | 23.12                 |
| 29159              | Pettis, MO                | -0.008               | 51.35                     | 80.35                 |
| 29161              | Phelps, MO                | 0.04                 | 72.33                     | 65.96                 |
| 29163              | Pike, MO                  | 0.061                | 78.29                     | 53.76                 |
| 29165              | Platte, MO                | -0.13                | 8.21                      | 9.59                  |
| 29167              | Polk, MO                  | 0.07                 | 80.74                     | 59.87                 |
| 29169              | Pulaski, MO               | 0.202                | 96.4                      | 65.03                 |
| 29171              | Putnam, MO                | -0.056               | 31.04                     | 57.64                 |
| 29173              | Ralls, MO                 | -0.021               | 46.16                     | 10.45                 |
| 29175              | Randolph, MO              | 0.072                | 81.47                     | 55.54                 |
| 29177              | Ray, MO                   | -0.013               | 49.76                     | 25.73                 |
| 29179              | Reynolds, MO              | 0.025                | 66.06                     | 55.73                 |
| 29181              | Ripley, MO                | 0.071                | 81.15                     | 71.5                  |
| 29183              | St. Charles, MO           | -0.085               | 18.72                     | 3.63                  |
| 29185              | St. Clair, MO             | -0.038               | 38.91                     | 49.87                 |
| 29186              | Ste. Genevieve, MO        | -0.068               | 25.88                     | 18.85                 |
| 29187              | St. Francois, MO          | 0.1                  | 86.92                     | 70.16                 |
| 29189              | St. Louis, MO             | -0.158               | 4.23                      | 26.11                 |
| 29195              | Saline, MO                | -0.003               | 54.06                     | 81.62                 |
| 29197              | Schuyler, MO              | 0.062                | 78.77                     | 38.31                 |
| 29199              | Scotland, MO              | 0.18                 | 95.26                     | 53.03                 |
| 29201              | Scott, MO                 | 0.014                | 61.51                     | 78.44                 |
| 29203              | Shannon, MO               | 0.062                | 78.51                     | 64.49                 |
| 29205              | Shelby, MO                | 0.035                | 70.61                     | 39.84                 |

| County FIPS | County Description  | DOS-SVI Index | DOS-SVI Percentile | SVI Percentile |
|-------------|---------------------|---------------|--------------------|----------------|
| 29207       | Stoddard, MO        | 0.029         | 68.04              | 46.43          |
| 29209       | Stone, MO           | -0.061        | 28.78              | 34.87          |
| 29211       | Sullivan, MO        | -0.024        | 44.76              | 62.96          |
| 29213       | Taney, MO           | -0.059        | 29.86              | 82.17          |
| 29215       | Texas, MO           | 0.071         | 81.03              | 83.03          |
| 29217       | Vernon, MO          | 0.06          | 77.84              | 45.1           |
| 29219       | Warren, MO          | 0.11          | 88.89              | 38.41          |
| 29221       | Washington, MO      | 0.184         | 95.54              | 79.04          |
| 29223       | Wayne, MO           | 0.143         | 92.87              | 76.46          |
| 29225       | Webster, MO         | 0.195         | 96.18              | 63.85          |
| 29227       | Worth, MO           | -0.068        | 25.72              | 22.39          |
| 29229       | Wright, MO          | 0.121         | 90.51              | 90.06          |
| 29510       | St. Louis City, MO  | -0.076        | 22.22              | 77.96          |
| 30001       | Beaverhead, MT      | 0.027         | 67.33              | 25.16          |
| 30003       | Big Horn, MT        | 0.614         | 99.65              | 82.74          |
| 30005       | Blaine, MT          | 0.311         | 98.57              | 91.5           |
| 30007       | Broadwater, MT      | -0.067        | 26.07              | 4.2            |
| 30009       | Carbon, MT          | -0.119        | 10.09              | 4.33           |
| 30011       | Carter, MT          | -0.025        | 44.25              | 4.87           |
| 30013       | Cascade, MT         | -0.025        | 44.13              | 41.02          |
| 30015       | Chouteau, MT        | 0.035         | 70.58              | 47.99          |
| 30017       | Custer, MT          | -0.072        | 24.1               | 29.01          |
| 30019       | Daniels, MT         | -0.155        | 4.52               | 2.42           |
| 30021       | Dawson, MT          | 0.026         | 66.6               | 7.52           |
| 30023       | Deer Lodge, MT      | -0.031        | 42.15              | 47.17          |
| 30025       | Fallon, MT          | 0.026         | 66.79              | 2.17           |
| 30027       | Fergus, MT          | -0.008        | 51.8               | 23.76          |
| 30029       | Flathead, MT        | 0.022         | 65.2               | 9.24           |
| 30031       | Gallatin, MT        | 0.006         | 57.88              | 4.27           |
| 30033       | Garfield, MT        | 0.058         | 77.49              | 0.76           |
| 30035       | Glacier, MT         | 0.23          | 97.36              | 85.83          |
| 30037       | Golden Valley, MT   | -0.143        | 5.86               | 5.19           |
| 30039       | Granite, MT         | -0.014        | 49.41              | 7.64           |
| 30041       | Hill, MT            | -0.028        | 43.23              | 69.84          |
| 30043       | Jefferson, MT       | -0.014        | 49.09              | 4.81           |
| 30045       | Judith Basin, MT    | -0.109        | 12.51              | 1.62           |
| 30047       | Lake, MT            | 0.006         | 58.04              | 64.68          |
| 30049       | Lewis and Clark, MT | -0.033        | 41.26              | 12.58          |
| 30051       | Liberty, MT         | -0.129        | 8.53               | 40.99          |
| 30053       | Lincoln, MT         | -0.013        | 49.86              | 41.94          |
| 30055       | McCone, MT          | 0.046         | 73.99              | 7.74           |
| 30057       | Madison, MT         | -0.161        | 3.92               | 17.26          |
| 30059       | Meagher, MT         | -0.046        | 35.37              | 4.65           |
| 30061       | Mineral, MT         | -0.027        | 43.71              | 56.21          |
| 30063       | Missoula, MT        | -0.035        | 40.5               | 17.8           |
| 30065       | Musselshell, MT     | 0.172         | 94.62              | 35.51          |
| 30067       | Park, MT            | -0.059        | 29.83              | 6.88           |
| 30069       | Petroleum, MT       | 0.011         | 60.33              | 0.29           |
| 30071       | Phillips, MT        | 0.136         | 92.01              | 41.46          |
| 30073       | Pondera, MT         | 0.035         | 70.52              | 82.96          |
| 30075       | Powder River, MT    | -0.138        | 6.84               | 3.92           |
| 30077       | Powell, MT          | 0.135         | 91.94              | 25.45          |
| 30079       | Prairie, MT         | -0.031        | 42.18              | 7.58           |
| 30081       | Ravalli, MT         | -0.039        | 38.84              | 18.6           |
| 30083       | Richland, MT        | 0.052         | 75.58              | 21.21          |



| <b>County FIPS</b> | <b>County Description</b> | <b>DOS-SVI Index</b> | <b>DOS-SVI Percentile</b> | <b>SVI Percentile</b> |
|--------------------|---------------------------|----------------------|---------------------------|-----------------------|
| 30085              | Roosevelt, MT             | 0.26                 | 97.83                     | 88.79                 |
| 30087              | Rosebud, MT               | 0.235                | 97.55                     | 60.7                  |
| 30089              | Sanders, MT               | -0.028               | 43.33                     | 34.78                 |
| 30091              | Sheridan, MT              | 0.008                | 59.03                     | 9.49                  |
| 30093              | Silver Bow, MT            | -0.009               | 51                        | 52.58                 |
| 30095              | Stillwater, MT            | 0.001                | 56                        | 3.6                   |
| 30097              | Sweet Grass, MT           | -0.135               | 7.29                      | 0.86                  |
| 30099              | Teton, MT                 | 0.09                 | 84.88                     | 29.81                 |
| 30101              | Toole, MT                 | 0.062                | 78.67                     | 47.68                 |
| 30103              | Treasure, MT              | -0.056               | 31.26                     | 5.67                  |
| 30105              | Valley, MT                | -0.04                | 38.36                     | 11.62                 |
| 30107              | Wheatland, MT             | 0.076                | 82.17                     | 54.36                 |
| 30109              | Wibaux, MT                | -0.083               | 19.77                     | 39.33                 |
| 30111              | Yellowstone, MT           | -0.002               | 54.89                     | 24.97                 |
| 31001              | Adams, NE                 | -0.016               | 48.27                     | 35.92                 |
| 31003              | Antelope, NE              | -0.061               | 28.75                     | 10.32                 |
| 31005              | Arthur, NE                | -0.048               | 34.51                     | 0.83                  |
| 31007              | Banner, NE                | -0.121               | 9.71                      | 0.41                  |
| 31009              | Blaine, NE                | 0.053                | 75.93                     | 9.08                  |
| 31011              | Boone, NE                 | -0.035               | 40.88                     | 2.83                  |
| 31013              | Box Butte, NE             | -0.062               | 28.43                     | 35.86                 |
| 31015              | Boyd, NE                  | -0.078               | 21.78                     | 9.2                   |
| 31017              | Brown, NE                 | -0.096               | 15.7                      | 12.52                 |
| 31019              | Buffalo, NE               | -0.019               | 46.74                     | 26.56                 |
| 31021              | Burt, NE                  | -0.038               | 39                        | 25.41                 |
| 31023              | Butler, NE                | -0.041               | 38.01                     | 11.72                 |
| 31025              | Cass, NE                  | -0.02                | 46.55                     | 1.08                  |
| 31027              | Cedar, NE                 | -0.029               | 43.11                     | 1.21                  |
| 31029              | Chase, NE                 | -0.138               | 6.78                      | 15.51                 |
| 31031              | Cherry, NE                | -0.096               | 15.6                      | 22.61                 |
| 31033              | Cheyenne, NE              | -0.001               | 55.37                     | 12.1                  |
| 31035              | Clay, NE                  | -0.049               | 33.68                     | 16.46                 |
| 31037              | Colfax, NE                | -0.045               | 35.94                     | 51.88                 |
| 31039              | Cuming, NE                | -0.088               | 17.83                     | 19.36                 |
| 31041              | Custer, NE                | -0.071               | 24.67                     | 18.18                 |
| 31043              | Dakota, NE                | -0.02                | 46.45                     | 86.15                 |
| 31045              | Dawes, NE                 | 0.008                | 58.99                     | 17.17                 |
| 31047              | Dawson, NE                | -0.118               | 10.35                     | 79.33                 |
| 31049              | Deuel, NE                 | -0.13                | 8.18                      | 16.5                  |
| 31051              | Dixon, NE                 | -0.044               | 36.52                     | 37.9                  |
| 31053              | Dodge, NE                 | -0.073               | 23.59                     | 56.91                 |
| 31055              | Douglas, NE               | -0.133               | 7.58                      | 46.69                 |
| 31057              | Dundy, NE                 | -0.116               | 10.86                     | 30.38                 |
| 31059              | Fillmore, NE              | -0.125               | 9.07                      | 6.18                  |
| 31061              | Franklin, NE              | -0.135               | 7.1                       | 7.68                  |
| 31063              | Frontier, NE              | -0.057               | 30.69                     | 9.94                  |
| 31065              | Furnas, NE                | -0.087               | 18.24                     | 18.25                 |
| 31067              | Gage, NE                  | -0.081               | 20.5                      | 11.05                 |
| 31069              | Garden, NE                | -0.089               | 17.45                     | 1.43                  |
| 31071              | Garfield, NE              | -0.138               | 6.81                      | 4.3                   |
| 31073              | Gosper, NE                | -0.082               | 20.12                     | 0.51                  |
| 31075              | Grant, NE                 | 0.056                | 76.86                     | 13.28                 |
| 31077              | Greeley, NE               | -0.038               | 39.16                     | 4.11                  |
| 31079              | Hall, NE                  | -0.106               | 13.31                     | 67.01                 |
| 31081              | Hamilton, NE              | -0.08                | 20.82                     | 0.89                  |

| <b>County FIPS</b> | <b>County Description</b> | <b>DOS-SVI Index</b> | <b>DOS-SVI Percentile</b> | <b>SVI Percentile</b> |
|--------------------|---------------------------|----------------------|---------------------------|-----------------------|
| 31083              | Harlan, NE                | -0.071               | 24.36                     | 12.39                 |
| 31085              | Hayes, NE                 | -0.102               | 14.23                     | 4.36                  |
| 31087              | Hitchcock, NE             | -0.038               | 39.41                     | 19.43                 |
| 31089              | Holt, NE                  | -0.049               | 33.84                     | 9.81                  |
| 31091              | Hooker, NE                | -0.143               | 5.92                      | 14.68                 |
| 31093              | Howard, NE                | -0.069               | 25.12                     | 8.03                  |
| 31095              | Jefferson, NE             | -0.159               | 4.17                      | 21.85                 |
| 31097              | Johnson, NE               | 0.057                | 77.24                     | 57.77                 |
| 31099              | Kearney, NE               | 0.019                | 63.39                     | 9.39                  |
| 31101              | Keith, NE                 | -0.065               | 27.06                     | 22.68                 |
| 31103              | Keya Paha, NE             | -0.074               | 23.21                     | 0.1                   |
| 31105              | Kimball, NE               | -0.063               | 28.24                     | 56.11                 |
| 31107              | Knox, NE                  | 0.042                | 73.03                     | 32.77                 |
| 31109              | Lancaster, NE             | -0.084               | 18.98                     | 30.25                 |
| 31111              | Lincoln, NE               | -0.037               | 39.73                     | 36.75                 |
| 31113              | Logan, NE                 | 0.108                | 88.35                     | 10.73                 |
| 31115              | Loup, NE                  | -0.155               | 4.49                      | 0.45                  |
| 31117              | McPherson, NE             | 0.122                | 90.83                     | 8.38                  |
| 31119              | Madison, NE               | -0.066               | 26.74                     | 51.05                 |
| 31121              | Merrick, NE               | 0.014                | 61.45                     | 19.75                 |
| 31123              | Morrill, NE               | -0.074               | 23.27                     | 42.2                  |
| 31125              | Nance, NE                 | -0.086               | 18.53                     | 8.25                  |
| 31127              | Nemaha, NE                | -0.052               | 32.76                     | 16.59                 |
| 31129              | Nuckolls, NE              | -0.117               | 10.66                     | 17.36                 |
| 31131              | Otoe, NE                  | -0.074               | 23.18                     | 22.87                 |
| 31133              | Pawnee, NE                | 0.006                | 58.36                     | 23.18                 |
| 31135              | Perkins, NE               | -0.068               | 25.63                     | 5.38                  |
| 31137              | Phelps, NE                | -0.069               | 25.21                     | 12.26                 |
| 31139              | Pierce, NE                | -0.039               | 38.52                     | 2.29                  |
| 31141              | Platte, NE                | -0.048               | 34.1                      | 29.94                 |
| 31143              | Polk, NE                  | 0.026                | 66.83                     | 19.08                 |
| 31145              | Red Willow, NE            | -0.072               | 24.07                     | 23.73                 |
| 31147              | Richardson, NE            | -0.127               | 8.76                      | 10.25                 |
| 31149              | Rock, NE                  | -0.141               | 6.14                      | 0.92                  |
| 31151              | Saline, NE                | -0.042               | 37.44                     | 59.78                 |
| 31153              | Sarpy, NE                 | -0.06                | 29.45                     | 9.71                  |
| 31155              | Saunders, NE              | -0.057               | 30.75                     | 4.24                  |
| 31157              | Scotts Bluff, NE          | -0.118               | 10.57                     | 56.75                 |
| 31159              | Seward, NE                | -0.019               | 46.99                     | 4.68                  |
| 31161              | Sheridan, NE              | -0.003               | 54.16                     | 59.68                 |
| 31163              | Sherman, NE               | -0.085               | 18.59                     | 7.39                  |
| 31165              | Sioux, NE                 | -0.065               | 27.19                     | 1.78                  |
| 31167              | Stanton, NE               | -0.073               | 23.66                     | 5.7                   |
| 31169              | Thayer, NE                | -0.088               | 17.92                     | 5.8                   |
| 31171              | Thomas, NE                | -0.133               | 7.61                      | 0.35                  |
| 31173              | Thurston, NE              | 0.462                | 99.46                     | 88.66                 |
| 31175              | Valley, NE                | -0.09                | 17.29                     | 14.84                 |
| 31177              | Washington, NE            | -0.053               | 32.19                     | 3.79                  |
| 31179              | Wayne, NE                 | 0.032                | 69.66                     | 8.47                  |
| 31181              | Webster, NE               | -0.072               | 24.13                     | 10.92                 |
| 31183              | Wheeler, NE               | -0.094               | 16.27                     | 0.48                  |
| 31185              | York, NE                  | -0.062               | 28.68                     | 18.28                 |
| 32001              | Churchill, NV             | 0.003                | 56.38                     | 60.48                 |
| 32003              | Clark, NV                 | -0.133               | 7.54                      | 74.04                 |
| 32005              | Douglas, NV               | -0.151               | 4.9                       | 17.93                 |

| <b>County FIPS</b> | <b>County Description</b> | <b>DOS-SVI Index</b> | <b>DOS-SVI Percentile</b> | <b>SVI Percentile</b> |
|--------------------|---------------------------|----------------------|---------------------------|-----------------------|
| 32007              | Elko, NV                  | 0.038                | 71.7                      | 51.78                 |
| 32009              | Esmeralda, NV             | -0.005               | 53.39                     | 63.95                 |
| 32011              | Eureka, NV                | 0.06                 | 77.78                     | 6.75                  |
| 32013              | Humboldt, NV              | 0.096                | 86.06                     | 58.69                 |
| 32015              | Lander, NV                | 0.19                 | 95.86                     | 82.61                 |
| 32017              | Lincoln, NV               | 0.038                | 71.82                     | 42.13                 |
| 32019              | Lyon, NV                  | 0.015                | 62.18                     | 57.83                 |
| 32021              | Mineral, NV               | 0.077                | 82.43                     | 88.15                 |
| 32023              | Nye, NV                   | 0.015                | 62.21                     | 73.09                 |
| 32027              | Pershing, NV              | 0.366                | 98.92                     | 90.38                 |
| 32029              | Storey, NV                | -0.229               | 1.02                      | 7.17                  |
| 32031              | Washoe, NV                | -0.056               | 31.11                     | 52.71                 |
| 32033              | White Pine, NV            | 0.111                | 89.02                     | 37.42                 |
| 32510              | Carson City, NV           | -0.074               | 23.37                     | 84.43                 |
| 33001              | Belknap, NH               | -0.064               | 27.86                     | 8.41                  |
| 33003              | Carroll, NH               | -0.117               | 10.7                      | 5.83                  |
| 33005              | Cheshire, NH              | -0.072               | 24.2                      | 14.17                 |
| 33007              | Coos, NH                  | -0.034               | 41.16                     | 52.9                  |
| 33009              | Grafton, NH               | -0.065               | 27.22                     | 18.82                 |
| 33011              | Hillsborough, NH          | -0.123               | 9.36                      | 19.11                 |
| 33013              | Merrimack, NH             | -0.077               | 22.06                     | 14.55                 |
| 33015              | Rockingham, NH            | -0.123               | 9.3                       | 1.11                  |
| 33017              | Strafford, NH             | -0.005               | 52.95                     | 17.48                 |
| 33019              | Sullivan, NH              | -0.11                | 12.32                     | 15.13                 |
| 34001              | Atlantic, NJ              | -0.121               | 9.81                      | 79.11                 |
| 34003              | Bergen, NJ                | -0.201               | 1.72                      | 23.95                 |
| 34005              | Burlington, NJ            | -0.116               | 11.08                     | 20.54                 |
| 34007              | Camden, NJ                | -0.152               | 4.74                      | 61.18                 |
| 34009              | Cape May, NJ              | -0.093               | 16.43                     | 33.98                 |
| 34011              | Cumberland, NJ            | -0.083               | 19.71                     | 95.92                 |
| 34013              | Essex, NJ                 | -0.088               | 17.64                     | 84.04                 |
| 34015              | Gloucester, NJ            | -0.066               | 26.49                     | 16.75                 |
| 34017              | Hudson, NJ                | -0.044               | 36.45                     | 64.24                 |
| 34019              | Hunterdon, NJ             | -0.111               | 12.19                     | 2.64                  |
| 34021              | Mercer, NJ                | -0.166               | 3.53                      | 55.8                  |
| 34023              | Middlesex, NJ             | -0.116               | 10.98                     | 46.59                 |
| 34025              | Monmouth, NJ              | -0.137               | 6.94                      | 16.05                 |
| 34027              | Morris, NJ                | -0.166               | 3.5                       | 12.01                 |
| 34029              | Ocean, NJ                 | -0.018               | 47.09                     | 33.54                 |
| 34031              | Passaic, NJ               | -0.041               | 37.76                     | 77.64                 |
| 34033              | Salem, NJ                 | -0.094               | 15.92                     | 59.01                 |
| 34035              | Somerset, NJ              | -0.17                | 3.18                      | 10                    |
| 34037              | Sussex, NJ                | -0.069               | 25.02                     | 1.91                  |
| 34039              | Union, NJ                 | -0.183               | 2.42                      | 62.32                 |
| 34041              | Warren, NJ                | -0.098               | 15.28                     | 21.78                 |
| 35001              | Bernalillo, NM            | -0.169               | 3.31                      | 68.28                 |
| 35003              | Catron, NM                | -0.238               | 0.8                       | 33.57                 |
| 35005              | Chaves, NM                | -0.105               | 13.47                     | 95.51                 |
| 35006              | Cibola, NM                | 0.277                | 98.09                     | 99.84                 |
| 35007              | Colfax, NM                | -0.07                | 24.8                      | 96.27                 |
| 35009              | Curry, NM                 | -0.06                | 29.39                     | 87.74                 |
| 35011              | De Baca, NM               | 0.012                | 60.94                     | 69.39                 |
| 35013              | Dona Ana, NM              | -0.084               | 18.94                     | 98.41                 |
| 35015              | Eddy, NM                  | -0.008               | 51.61                     | 70.32                 |
| 35017              | Grant, NM                 | -0.045               | 35.82                     | 92.96                 |

| <b>County FIPS</b> | <b>County Description</b> | <b>DOS-SVI Index</b> | <b>DOS-SVI Percentile</b> | <b>SVI Percentile</b> |
|--------------------|---------------------------|----------------------|---------------------------|-----------------------|
| 35019              | Guadalupe, NM             | -0.071               | 24.58                     | 95.29                 |
| 35021              | Harding, NM               | -0.168               | 3.34                      | 36.15                 |
| 35023              | Hidalgo, NM               | -0.029               | 43.14                     | 96.31                 |
| 35025              | Lea, NM                   | 0.032                | 69.41                     | 92.17                 |
| 35027              | Lincoln, NM               | -0.128               | 8.69                      | 47.96                 |
| 35028              | Los Alamos, NM            | -0.148               | 5.44                      | 2.48                  |
| 35029              | Luna, NM                  | -0.088               | 17.96                     | 99.9                  |
| 35031              | McKinley, NM              | 0.499                | 99.52                     | 98.89                 |
| 35033              | Mora, NM                  | -0.02                | 46.48                     | 79.59                 |
| 35035              | Otero, NM                 | 0.01                 | 60.01                     | 91.4                  |
| 35037              | Quay, NM                  | -0.14                | 6.27                      | 80.96                 |
| 35041              | Roosevelt, NM             | 0.061                | 78.32                     | 94.3                  |
| 35043              | Sandoval, NM              | -0.035               | 40.4                      | 48.18                 |
| 35045              | San Juan, NM              | 0.179                | 95.19                     | 91.94                 |
| 35047              | San Miguel, NM            | -0.171               | 3.12                      | 98.63                 |
| 35049              | Santa Fe, NM              | -0.225               | 1.11                      | 52.55                 |
| 35051              | Sierra, NM                | -0.189               | 2.13                      | 91.46                 |
| 35053              | Socorro, NM               | -0.002               | 54.79                     | 97.45                 |
| 35055              | Taos, NM                  | -0.133               | 7.64                      | 85.86                 |
| 35057              | Torrance, NM              | 0.068                | 80.04                     | 74.9                  |
| 35059              | Union, NM                 | -0.076               | 22.38                     | 67.93                 |
| 35061              | Valencia, NM              | -0.018               | 47.28                     | 90.41                 |
| 36001              | Albany, NY                | -0.072               | 23.97                     | 30.41                 |
| 36003              | Allegany, NY              | 0.107                | 88.22                     | 58.18                 |
| 36005              | Bronx, NY                 | 0.13                 | 91.53                     | 99.27                 |
| 36007              | Broome, NY                | -0.006               | 52.75                     | 61.66                 |
| 36009              | Cattaraugus, NY           | 0.071                | 81.22                     | 72.83                 |
| 36011              | Cayuga, NY                | -0.03                | 42.63                     | 50.25                 |
| 36013              | Chautauqua, NY            | 0.01                 | 59.82                     | 72.48                 |
| 36015              | Chemung, NY               | -0.027               | 43.84                     | 48.5                  |
| 36017              | Chenango, NY              | 0.044                | 73.58                     | 56.46                 |
| 36019              | Clinton, NY               | 0.021                | 64.69                     | 53.12                 |
| 36021              | Columbia, NY              | -0.091               | 16.91                     | 38.54                 |
| 36023              | Cortland, NY              | 0.019                | 63.36                     | 34.52                 |
| 36025              | Delaware, NY              | 0.01                 | 59.98                     | 63.31                 |
| 36027              | Dutchess, NY              | 0.021                | 64.5                      | 42.07                 |
| 36029              | Erie, NY                  | -0.066               | 26.36                     | 41.4                  |
| 36031              | Essex, NY                 | -0.008               | 51.67                     | 38.69                 |
| 36033              | Franklin, NY              | 0.076                | 82.14                     | 70.73                 |
| 36035              | Fulton, NY                | -0.05                | 33.27                     | 50.1                  |
| 36037              | Genesee, NY               | -0.048               | 34.16                     | 18.79                 |
| 36039              | Greene, NY                | 0.019                | 63.45                     | 41.59                 |
| 36041              | Hamilton, NY              | -0.082               | 20.06                     | 38.98                 |
| 36043              | Herkimer, NY              | 0.031                | 69.21                     | 53.22                 |
| 36045              | Jefferson, NY             | 0.081                | 83.25                     | 64.84                 |
| 36047              | Kings, NY                 | 0.349                | 98.82                     | 81.53                 |
| 36049              | Lewis, NY                 | 0.032                | 69.72                     | 29.11                 |
| 36051              | Livingston, NY            | 0.038                | 71.76                     | 34.24                 |
| 36053              | Madison, NY               | 0.017                | 62.53                     | 16.66                 |
| 36055              | Monroe, NY                | -0.108               | 12.73                     | 52.04                 |
| 36057              | Montgomery, NY            | 0.017                | 62.62                     | 83.06                 |
| 36059              | Nassau, NY                | -0.14                | 6.37                      | 24.3                  |
| 36061              | New York, NY              | 0.072                | 81.25                     | 55.1                  |
| 36063              | Niagara, NY               | -0.068               | 25.5                      | 33.18                 |
| 36065              | Oneida, NY                | -0.038               | 38.94                     | 69.46                 |

| <b>County FIPS</b> | <b>County Description</b> | <b>DOS-SVI Index</b> | <b>DOS-SVI Percentile</b> | <b>SVI Percentile</b> |
|--------------------|---------------------------|----------------------|---------------------------|-----------------------|
| 36067              | Onondaga, NY              | -0.07                | 24.86                     | 52.07                 |
| 36069              | Ontario, NY               | -0.075               | 22.8                      | 23.15                 |
| 36071              | Orange, NY                | 0.033                | 69.88                     | 55.38                 |
| 36073              | Orleans, NY               | 0.028                | 67.59                     | 64.3                  |
| 36075              | Oswego, NY                | 0.068                | 80.2                      | 64.97                 |
| 36077              | Otsego, NY                | 0.067                | 79.88                     | 42.36                 |
| 36079              | Putnam, NY                | -0.07                | 24.83                     | 8.12                  |
| 36081              | Queens, NY                | 0.093                | 85.51                     | 62.01                 |
| 36083              | Rensselaer, NY            | -0.057               | 30.63                     | 34.3                  |
| 36085              | Richmond, NY              | 0.027                | 67.4                      | 47.64                 |
| 36087              | Rockland, NY              | 0.089                | 84.56                     | 60.38                 |
| 36089              | St. Lawrence, NY          | 0.096                | 86.09                     | 74.75                 |
| 36091              | Saratoga, NY              | -0.094               | 16.14                     | 4.75                  |
| 36093              | Schenectady, NY           | -0.044               | 36.26                     | 39.43                 |
| 36095              | Schoharie, NY             | -0.061               | 28.84                     | 40.13                 |
| 36097              | Schuyler, NY              | 0.021                | 64.47                     | 36.91                 |
| 36099              | Seneca, NY                | 0.011                | 60.4                      | 44.9                  |
| 36101              | Steuben, NY               | 0.004                | 56.77                     | 46.91                 |
| 36103              | Suffolk, NY               | -0.083               | 19.74                     | 21.46                 |
| 36105              | Sullivan, NY              | 0.022                | 64.76                     | 79.39                 |
| 36107              | Tioga, NY                 | -0.012               | 49.98                     | 19.94                 |
| 36109              | Tompkins, NY              | 0.056                | 76.92                     | 34.62                 |
| 36111              | Ulster, NY                | -0.042               | 37.41                     | 47.04                 |
| 36113              | Warren, NY                | -0.068               | 25.91                     | 17.42                 |
| 36115              | Washington, NY            | 0.012                | 61                        | 40                    |
| 36117              | Wayne, NY                 | -0.023               | 45.24                     | 34.14                 |
| 36119              | Westchester, NY           | -0.148               | 5.48                      | 55.16                 |
| 36121              | Wyoming, NY               | 0.014                | 61.54                     | 31.21                 |
| 36123              | Yates, NY                 | 0.131                | 91.59                     | 43.92                 |
| 37001              | Alamance, NC              | -0.093               | 16.46                     | 78.38                 |
| 37003              | Alexander, NC             | 0.091                | 84.91                     | 63.41                 |
| 37005              | Alleghany, NC             | -0.127               | 8.85                      | 62.68                 |
| 37007              | Anson, NC                 | 0.106                | 88.09                     | 94.43                 |
| 37009              | Ashe, NC                  | -0.084               | 19.29                     | 49.94                 |
| 37011              | Avery, NC                 | 0.052                | 75.68                     | 64.46                 |
| 37013              | Beaufort, NC              | -0.043               | 36.64                     | 71.56                 |
| 37015              | Bertie, NC                | 0.08                 | 83.13                     | 93.85                 |
| 37017              | Bladen, NC                | 0.011                | 60.49                     | 94.46                 |
| 37019              | Brunswick, NC             | -0.118               | 10.25                     | 35.83                 |
| 37021              | Buncombe, NC              | -0.018               | 47.31                     | 37.99                 |
| 37023              | Burke, NC                 | 0.071                | 80.9                      | 84.87                 |
| 37025              | Cabarrus, NC              | 0.024                | 65.93                     | 41.75                 |
| 37027              | Caldwell, NC              | -0.008               | 51.51                     | 65.1                  |
| 37029              | Camden, NC                | -0.035               | 40.56                     | 30.7                  |
| 37031              | Carteret, NC              | -0.126               | 8.95                      | 42.55                 |
| 37033              | Caswell, NC               | 0.056                | 76.69                     | 83.6                  |
| 37035              | Catawba, NC               | -0.003               | 54.28                     | 64.81                 |
| 37037              | Chatham, NC               | -0.142               | 6.08                      | 38.09                 |
| 37039              | Cherokee, NC              | -0.007               | 52.31                     | 48.69                 |
| 37041              | Chowan, NC                | -0.006               | 52.59                     | 81.18                 |
| 37043              | Clay, NC                  | -0.089               | 17.57                     | 21.91                 |
| 37045              | Cleveland, NC             | 0.04                 | 72.08                     | 83.5                  |
| 37047              | Columbus, NC              | 0.03                 | 68.51                     | 94.81                 |
| 37049              | Craven, NC                | -0.004               | 53.52                     | 80.99                 |
| 37051              | Cumberland, NC            | -0.046               | 35.5                      | 86.4                  |

| <b>County FIPS</b> | <b>County Description</b> | <b>DOS-SVI Index</b> | <b>DOS-SVI Percentile</b> | <b>SVI Percentile</b> |
|--------------------|---------------------------|----------------------|---------------------------|-----------------------|
| 37053              | Currituck, NC             | -0.006               | 52.56                     | 11.94                 |
| 37055              | Dare, NC                  | -0.058               | 30.21                     | 14.49                 |
| 37057              | Davidson, NC              | 0.01                 | 59.85                     | 68.41                 |
| 37059              | Davie, NC                 | -0.027               | 43.46                     | 44.11                 |
| 37061              | Duplin, NC                | 0.068                | 80.13                     | 97.9                  |
| 37063              | Durham, NC                | -0.203               | 1.66                      | 61.97                 |
| 37065              | Edgecombe, NC             | -0.034               | 41.1                      | 97.26                 |
| 37067              | Forsyth, NC               | -0.125               | 9.11                      | 68.34                 |
| 37069              | Franklin, NC              | 0.012                | 60.9                      | 63.76                 |
| 37071              | Gaston, NC                | -0.007               | 52.28                     | 67.2                  |
| 37073              | Gates, NC                 | 0.016                | 62.3                      | 35.67                 |
| 37075              | Graham, NC                | 0.047                | 74.28                     | 63.38                 |
| 37077              | Granville, NC             | -0.068               | 25.76                     | 65.61                 |
| 37079              | Greene, NC                | 0.086                | 84.11                     | 99.24                 |
| 37081              | Guilford, NC              | -0.146               | 5.76                      | 63.69                 |
| 37083              | Halifax, NC               | -0.058               | 30.59                     | 96.46                 |
| 37085              | Harnett, NC               | 0.078                | 82.55                     | 78.69                 |
| 37087              | Haywood, NC               | -0.085               | 18.85                     | 28.09                 |
| 37089              | Henderson, NC             | -0.098               | 15.22                     | 32.1                  |
| 37091              | Hertford, NC              | 0.023                | 65.23                     | 98.73                 |
| 37093              | Hoke, NC                  | 0.045                | 73.83                     | 89.24                 |
| 37095              | Hyde, NC                  | 0.114                | 89.53                     | 86.27                 |
| 37097              | Iredell, NC               | -0.03                | 42.38                     | 37.45                 |
| 37099              | Jackson, NC               | 0.008                | 59.22                     | 62.36                 |
| 37101              | Johnston, NC              | -0.016               | 48.39                     | 53.95                 |
| 37103              | Jones, NC                 | 0.034                | 70.26                     | 87.61                 |
| 37105              | Lee, NC                   | -0.037               | 39.76                     | 84.81                 |
| 37107              | Lenoir, NC                | 0.023                | 65.68                     | 99.33                 |
| 37109              | Lincoln, NC               | -0.005               | 53.33                     | 35.64                 |
| 37111              | McDowell, NC              | 0.055                | 76.5                      | 78.95                 |
| 37113              | Macon, NC                 | -0.079               | 21.17                     | 35.48                 |
| 37115              | Madison, NC               | 0.043                | 73.22                     | 45.86                 |
| 37117              | Martin, NC                | -0.079               | 21.14                     | 75.41                 |
| 37119              | Mecklenburg, NC           | -0.214               | 1.27                      | 44.08                 |
| 37121              | Mitchell, NC              | -0.058               | 30.31                     | 42.23                 |
| 37123              | Montgomery, NC            | 0.048                | 74.5                      | 87.13                 |
| 37125              | Moore, NC                 | -0.079               | 21.43                     | 36.21                 |
| 37127              | Nash, NC                  | -0.025               | 44.22                     | 82.87                 |
| 37129              | New Hanover, NC           | -0.135               | 7.2                       | 37.71                 |
| 37131              | Northampton, NC           | -0.126               | 8.88                      | 90.22                 |
| 37133              | Onslow, NC                | 0.108                | 88.41                     | 74.65                 |
| 37135              | Orange, NC                | -0.082               | 20.09                     | 29.59                 |
| 37137              | Pamlico, NC               | 0.031                | 69.09                     | 71.62                 |
| 37139              | Pasquotank, NC            | -0.006               | 52.44                     | 77.48                 |
| 37141              | Pender, NC                | 0.057                | 77.2                      | 54.78                 |
| 37143              | Perquimans, NC            | -0.058               | 30.4                      | 50.48                 |
| 37145              | Person, NC                | 0.041                | 72.68                     | 77.32                 |
| 37147              | Pitt, NC                  | -0.039               | 38.43                     | 82.42                 |
| 37149              | Polk, NC                  | -0.06                | 29.42                     | 38.25                 |
| 37151              | Randolph, NC              | -0.019               | 46.86                     | 69.65                 |
| 37153              | Richmond, NC              | 0.028                | 67.56                     | 97.96                 |
| 37155              | Robeson, NC               | 0.075                | 81.95                     | 99.11                 |
| 37157              | Rockingham, NC            | -0.023               | 45.3                      | 78.57                 |
| 37159              | Rowan, NC                 | -0.002               | 54.66                     | 81.43                 |
| 37161              | Rutherford, NC            | 0.018                | 62.97                     | 75.51                 |

| <b>County FIPS</b> | <b>County Description</b> | <b>DOS-SVI Index</b> | <b>DOS-SVI Percentile</b> | <b>SVI Percentile</b> |
|--------------------|---------------------------|----------------------|---------------------------|-----------------------|
| 37163              | Sampson, NC               | 0.04                 | 72.14                     | 97.23                 |
| 37165              | Scotland, NC              | 0.147                | 93.31                     | 99.36                 |
| 37167              | Stanly, NC                | 0.04                 | 72.11                     | 63.25                 |
| 37169              | Stokes, NC                | -0.018               | 47.12                     | 30.67                 |
| 37171              | Surry, NC                 | 0.022                | 64.85                     | 72.58                 |
| 37173              | Swain, NC                 | 0.053                | 76.03                     | 77.74                 |
| 37175              | Transylvania, NC          | -0.074               | 23.14                     | 39.75                 |
| 37177              | Tyrrell, NC               | 0.066                | 79.59                     | 87.64                 |
| 37179              | Union, NC                 | 0.02                 | 64.15                     | 18.73                 |
| 37181              | Vance, NC                 | 0.02                 | 64.12                     | 97.87                 |
| 37183              | Wake, NC                  | -0.134               | 7.39                      | 27.74                 |
| 37185              | Warren, NC                | -0.026               | 43.97                     | 89.43                 |
| 37187              | Washington, NC            | -0.119               | 10.19                     | 87.87                 |
| 37189              | Watauga, NC               | 0.022                | 64.95                     | 41.21                 |
| 37191              | Wayne, NC                 | -0.033               | 41.39                     | 95.03                 |
| 37193              | Wilkes, NC                | -0.006               | 52.69                     | 69.24                 |
| 37195              | Wilson, NC                | -0.021               | 46.13                     | 93.6                  |
| 37197              | Yadkin, NC                | 0.008                | 58.93                     | 64.04                 |
| 37199              | Yancey, NC                | -0.028               | 43.36                     | 57.36                 |
| 38001              | Adams, ND                 | -0.099               | 14.9                      | 2.99                  |
| 38003              | Barnes, ND                | -0.088               | 17.86                     | 12.45                 |
| 38005              | Benson, ND                | 0.245                | 97.68                     | 84.33                 |
| 38007              | Billings, ND              | -0.024               | 44.95                     | 3.12                  |
| 38009              | Bottineau, ND             | -0.058               | 30.44                     | 6.91                  |
| 38011              | Bowman, ND                | 0.02                 | 64.22                     | 17.55                 |
| 38013              | Burke, ND                 | 0.11                 | 88.95                     | 0.7                   |
| 38015              | Burleigh, ND              | -0.104               | 13.56                     | 17.39                 |
| 38017              | Cass, ND                  | -0.209               | 1.4                       | 14.27                 |
| 38019              | Cavalier, ND              | -0.118               | 10.47                     | 1.72                  |
| 38021              | Dickey, ND                | 0.018                | 62.94                     | 11.59                 |
| 38023              | Divide, ND                | -0.208               | 1.43                      | 3.34                  |
| 38025              | Dunn, ND                  | 0.037                | 71.35                     | 22.26                 |
| 38027              | Eddy, ND                  | -0.207               | 1.5                       | 29.04                 |
| 38029              | Emmons, ND                | -0.159               | 4.04                      | 9.55                  |
| 38031              | Foster, ND                | -0.059               | 29.89                     | 1.75                  |
| 38033              | Golden Valley, ND         | -0.009               | 51.1                      | 9.3                   |
| 38035              | Grand Forks, ND           | -0.122               | 9.49                      | 30.29                 |
| 38037              | Grant, ND                 | -0.044               | 36.61                     | 7.1                   |
| 38039              | Griggs, ND                | -0.224               | 1.18                      | 7.32                  |
| 38041              | Hettinger, ND             | -0.141               | 6.11                      | 5.61                  |
| 38043              | Kidder, ND                | -0.021               | 46                        | 2.9                   |
| 38045              | LaMoure, ND               | -0.113               | 11.62                     | 4.43                  |
| 38047              | Logan, ND                 | -0.064               | 27.57                     | 3.82                  |
| 38049              | McHenry, ND               | -0.091               | 16.75                     | 2.96                  |
| 38051              | McIntosh, ND              | -0.245               | 0.67                      | 10.61                 |
| 38053              | McKenzie, ND              | 0.161                | 94.14                     | 39.2                  |
| 38055              | McLean, ND                | -0.077               | 22                        | 8.34                  |
| 38057              | Mercer, ND                | -0.04                | 38.4                      | 10.16                 |
| 38059              | Morton, ND                | -0.036               | 40.08                     | 10.35                 |
| 38061              | Mountrail, ND             | 0.14                 | 92.45                     | 37.58                 |
| 38063              | Nelson, ND                | -0.124               | 9.23                      | 3.5                   |
| 38065              | Oliver, ND                | -0.07                | 24.77                     | 21.08                 |
| 38067              | Pembina, ND               | -0.081               | 20.47                     | 4.17                  |
| 38069              | Pierce, ND                | -0.134               | 7.48                      | 19.14                 |
| 38071              | Ramsey, ND                | -0.1                 | 14.74                     | 35.32                 |

| <b>County FIPS</b> | <b>County Description</b> | <b>DOS-SVI Index</b> | <b>DOS-SVI Percentile</b> | <b>SVI Percentile</b> |
|--------------------|---------------------------|----------------------|---------------------------|-----------------------|
| 38073              | Ransom, ND                | -0.17                | 3.15                      | 8.57                  |
| 38075              | Renville, ND              | -0.008               | 51.48                     | 2.8                   |
| 38077              | Richland, ND              | -0.078               | 21.62                     | 12.17                 |
| 38079              | Rolette, ND               | 0.078                | 82.62                     | 90.7                  |
| 38081              | Sargent, ND               | -0.103               | 14.01                     | 2.32                  |
| 38083              | Sheridan, ND              | -0.183               | 2.52                      | 7.42                  |
| 38085              | Sioux, ND                 | 0.459                | 99.36                     | 88.44                 |
| 38087              | Slope, ND                 | -0.143               | 5.95                      | 1.37                  |
| 38089              | Stark, ND                 | -0.015               | 48.68                     | 21.4                  |
| 38091              | Steele, ND                | -0.065               | 26.9                      | 0.19                  |
| 38093              | Stutsman, ND              | -0.048               | 34.38                     | 24.24                 |
| 38095              | Towner, ND                | 0.004                | 56.92                     | 19.46                 |
| 38097              | Traill, ND                | -0.061               | 29.16                     | 9.27                  |
| 38099              | Walsh, ND                 | -0.093               | 16.36                     | 36.82                 |
| 38101              | Ward, ND                  | -0.031               | 42.22                     | 16.78                 |
| 38103              | Wells, ND                 | -0.099               | 15.06                     | 6.11                  |
| 38105              | Williams, ND              | -0.08                | 20.85                     | 25.1                  |
| 39001              | Adams, OH                 | 0.086                | 83.99                     | 77.04                 |
| 39003              | Allen, OH                 | -0.047               | 34.64                     | 57.93                 |
| 39005              | Ashland, OH               | 0.034                | 70.2                      | 43.34                 |
| 39007              | Ashtabula, OH             | 0.042                | 73                        | 78.57                 |
| 39009              | Athens, OH                | 0.134                | 91.85                     | 73.25                 |
| 39011              | Auglaize, OH              | -0.036               | 40.31                     | 5.35                  |
| 39013              | Belmont, OH               | -0.032               | 41.58                     | 35.96                 |
| 39015              | Brown, OH                 | 0.03                 | 68.23                     | 40.48                 |
| 39017              | Butler, OH                | -0.063               | 28.21                     | 36.18                 |
| 39019              | Carroll, OH               | -0.017               | 47.6                      | 15.38                 |
| 39021              | Champaign, OH             | -0.011               | 50.4                      | 29.78                 |
| 39023              | Clark, OH                 | -0.064               | 27.7                      | 72.71                 |
| 39025              | Clermont, OH              | -0.062               | 28.34                     | 10.29                 |
| 39027              | Clinton, OH               | 0.007                | 58.87                     | 44.24                 |
| 39029              | Columbiana, OH            | 0.031                | 69.05                     | 48.54                 |
| 39031              | Coshocton, OH             | 0.116                | 89.78                     | 62.07                 |
| 39033              | Crawford, OH              | -0.08                | 20.89                     | 31.91                 |
| 39035              | Cuyahoga, OH              | -0.154               | 4.65                      | 68.09                 |
| 39037              | Darke, OH                 | -0.008               | 51.73                     | 13.47                 |
| 39039              | Defiance, OH              | -0.057               | 30.88                     | 21.66                 |
| 39041              | Delaware, OH              | -0.059               | 29.74                     | 1.66                  |
| 39043              | Erie, OH                  | -0.147               | 5.73                      | 29.14                 |
| 39045              | Fairfield, OH             | -0.03                | 42.41                     | 23.54                 |
| 39047              | Fayette, OH               | -0.059               | 29.64                     | 50.16                 |
| 39049              | Franklin, OH              | -0.115               | 11.18                     | 51.24                 |
| 39051              | Fulton, OH                | -0.022               | 45.53                     | 17.77                 |
| 39053              | Gallia, OH                | 0.092                | 85.2                      | 66.4                  |
| 39055              | Geauga, OH                | 0.052                | 75.77                     | 9.01                  |
| 39057              | Greene, OH                | -0.083               | 19.61                     | 20.76                 |
| 39059              | Guernsey, OH              | 0.008                | 59.28                     | 67.07                 |
| 39061              | Hamilton, OH              | -0.11                | 12.48                     | 53.69                 |
| 39063              | Hancock, OH               | -0.054               | 31.84                     | 21.11                 |
| 39065              | Hardin, OH                | 0.111                | 89.08                     | 47.1                  |
| 39067              | Harrison, OH              | 0.041                | 72.81                     | 51.94                 |
| 39069              | Henry, OH                 | -0.094               | 16.01                     | 15.57                 |
| 39071              | Highland, OH              | 0.051                | 75.29                     | 68.98                 |
| 39073              | Hocking, OH               | 0.049                | 74.53                     | 46.85                 |
| 39075              | Holmes, OH                | 0.459                | 99.39                     | 43.6                  |



| <b>County FIPS</b> | <b>County Description</b> | <b>DOS-SVI Index</b> | <b>DOS-SVI Percentile</b> | <b>SVI Percentile</b> |
|--------------------|---------------------------|----------------------|---------------------------|-----------------------|
| 39077              | Huron, OH                 | -0.014               | 49.25                     | 43.25                 |
| 39079              | Jackson, OH               | 0.098                | 86.31                     | 77.26                 |
| 39081              | Jefferson, OH             | -0.042               | 37.47                     | 54.94                 |
| 39083              | Knox, OH                  | 0.05                 | 74.94                     | 29.43                 |
| 39085              | Lake, OH                  | -0.159               | 4.11                      | 12.93                 |
| 39087              | Lawrence, OH              | 0.002                | 56.19                     | 55.83                 |
| 39089              | Licking, OH               | -0.018               | 47.18                     | 22.9                  |
| 39091              | Logan, OH                 | 0.027                | 67.37                     | 31.69                 |
| 39093              | Lorain, OH                | -0.109               | 12.61                     | 50.89                 |
| 39095              | Lucas, OH                 | -0.118               | 10.54                     | 68.76                 |
| 39097              | Madison, OH               | 0.029                | 67.97                     | 33.82                 |
| 39099              | Mahoning, OH              | -0.115               | 11.27                     | 58.89                 |
| 39101              | Marion, OH                | 0.057                | 77.17                     | 64.14                 |
| 39103              | Medina, OH                | -0.063               | 28.11                     | 1.02                  |
| 39105              | Meigs, OH                 | 0.096                | 86.12                     | 67.87                 |
| 39107              | Mercer, OH                | -0.003               | 53.93                     | 5.1                   |
| 39109              | Miami, OH                 | -0.063               | 28.02                     | 11.91                 |
| 39111              | Monroe, OH                | -0.019               | 46.93                     | 44.3                  |
| 39113              | Montgomery, OH            | -0.091               | 16.81                     | 67.26                 |
| 39115              | Morgan, OH                | -0.007               | 52.24                     | 56.59                 |
| 39117              | Morrow, OH                | 0.083                | 83.54                     | 19.2                  |
| 39119              | Muskingum, OH             | 0.005                | 57.4                      | 59.81                 |
| 39121              | Noble, OH                 | 0.088                | 84.27                     | 42.93                 |
| 39123              | Ottawa, OH                | -0.125               | 9.14                      | 15.41                 |
| 39125              | Paulding, OH              | 0.032                | 69.28                     | 28.85                 |
| 39127              | Perry, OH                 | 0.037                | 71.38                     | 55.45                 |
| 39129              | Pickaway, OH              | 0.035                | 70.81                     | 28.18                 |
| 39131              | Pike, OH                  | 0.107                | 88.25                     | 79.94                 |
| 39133              | Portage, OH               | -0.056               | 31.39                     | 24.55                 |
| 39135              | Preble, OH                | -0.005               | 52.79                     | 16.91                 |
| 39137              | Putnam, OH                | -0.014               | 49.48                     | 1.53                  |
| 39139              | Richland, OH              | 0.017                | 62.69                     | 61.69                 |
| 39141              | Ross, OH                  | 0.066                | 79.75                     | 72.55                 |
| 39143              | Sandusky, OH              | -0.09                | 17.19                     | 39.87                 |
| 39145              | Scioto, OH                | 0.064                | 79.21                     | 83.47                 |
| 39147              | Seneca, OH                | -0.054               | 32.09                     | 37.55                 |
| 39149              | Shelby, OH                | -0.009               | 51.13                     | 18.92                 |
| 39151              | Stark, OH                 | -0.081               | 20.41                     | 36.66                 |
| 39153              | Summit, OH                | -0.116               | 10.95                     | 33.34                 |
| 39155              | Trumbull, OH              | -0.094               | 16.2                      | 46.4                  |
| 39157              | Tuscarawas, OH            | -0.004               | 53.68                     | 34.43                 |
| 39159              | Union, OH                 | 0.029                | 67.91                     | 7.71                  |
| 39161              | Van Wert, OH              | -0.083               | 19.58                     | 16.97                 |
| 39163              | Vinton, OH                | 0.13                 | 91.5                      | 72.29                 |
| 39165              | Warren, OH                | -0.052               | 32.86                     | 4.78                  |
| 39167              | Washington, OH            | -0.056               | 31.2                      | 34.97                 |
| 39169              | Wayne, OH                 | 0.088                | 84.43                     | 47.9                  |
| 39171              | Williams, OH              | -0.008               | 51.77                     | 26.91                 |
| 39173              | Wood, OH                  | -0.057               | 30.95                     | 16.62                 |
| 39175              | Wyandot, OH               | -0.075               | 22.76                     | 22.74                 |
| 40001              | Adair, OK                 | 0.121                | 90.58                     | 89.65                 |
| 40003              | Alfalfa, OK               | 0.044                | 73.54                     | 25.35                 |
| 40005              | Atoka, OK                 | 0.095                | 85.74                     | 80.76                 |
| 40007              | Beaver, OK                | -0.021               | 46.29                     | 45.54                 |
| 40009              | Beckham, OK               | 0.133                | 91.72                     | 71.18                 |

| <b>County FIPS</b> | <b>County Description</b> | <b>DOS-SVI Index</b> | <b>DOS-SVI Percentile</b> | <b>SVI Percentile</b> |
|--------------------|---------------------------|----------------------|---------------------------|-----------------------|
| 40011              | Blaine, OK                | 0.006                | 58.29                     | 66.78                 |
| 40013              | Bryan, OK                 | 0.068                | 80.01                     | 81.27                 |
| 40015              | Caddo, OK                 | 0.071                | 80.83                     | 94.59                 |
| 40017              | Canadian, OK              | 0.009                | 59.73                     | 26.21                 |
| 40019              | Carter, OK                | 0.026                | 66.64                     | 79.14                 |
| 40021              | Cherokee, OK              | 0.075                | 81.98                     | 92.71                 |
| 40023              | Choctaw, OK               | 0.023                | 65.27                     | 96.02                 |
| 40025              | Cimarron, OK              | -0.108               | 12.77                     | 44.75                 |
| 40027              | Cleveland, OK             | -0.05                | 33.3                      | 34.36                 |
| 40029              | Coal, OK                  | 0.011                | 60.59                     | 82.55                 |
| 40031              | Comanche, OK              | 0.025                | 66                        | 83.54                 |
| 40033              | Cotton, OK                | 0.067                | 79.94                     | 67.42                 |
| 40035              | Craig, OK                 | -0.024               | 45.02                     | 85.38                 |
| 40037              | Creek, OK                 | 0.038                | 71.86                     | 49.01                 |
| 40039              | Custer, OK                | 0.032                | 69.53                     | 75.03                 |
| 40041              | Delaware, OK              | -0.001               | 55.01                     | 76.97                 |
| 40043              | Dewey, OK                 | -0.01                | 50.78                     | 22.48                 |
| 40045              | Ellis, OK                 | -0.05                | 33.46                     | 30.19                 |
| 40047              | Garfield, OK              | -0.056               | 31.3                      | 59.08                 |
| 40049              | Garvin, OK                | -0.001               | 55.27                     | 51.15                 |
| 40051              | Grady, OK                 | 0.018                | 63.26                     | 30.8                  |
| 40053              | Grant, OK                 | -0.104               | 13.63                     | 16.34                 |
| 40055              | Greer, OK                 | 0.03                 | 68.58                     | 77.42                 |
| 40057              | Harmon, OK                | -0.06                | 29.51                     | 81.08                 |
| 40059              | Harper, OK                | -0.024               | 44.63                     | 31.85                 |
| 40061              | Haskell, OK               | 0.129                | 91.47                     | 87.36                 |
| 40063              | Hughes, OK                | 0.094                | 85.61                     | 81.15                 |
| 40065              | Jackson, OK               | -0.029               | 43.08                     | 82.26                 |
| 40067              | Jefferson, OK             | 0.005                | 57.82                     | 87.45                 |
| 40069              | Johnston, OK              | 0.057                | 77.08                     | 84.68                 |
| 40071              | Kay, OK                   | 0.014                | 61.64                     | 84.2                  |
| 40073              | Kingfisher, OK            | -0.017               | 47.85                     | 38.06                 |
| 40075              | Kiowa, OK                 | -0.052               | 32.57                     | 65.45                 |
| 40077              | Latimer, OK               | 0.061                | 78.22                     | 89.36                 |
| 40079              | Le Flore, OK              | -0.005               | 53.14                     | 90.32                 |
| 40081              | Lincoln, OK               | 0.084                | 83.76                     | 47.87                 |
| 40083              | Logan, OK                 | 0.05                 | 74.91                     | 29.84                 |
| 40085              | Love, OK                  | 0.007                | 58.84                     | 62.93                 |
| 40087              | McClain, OK               | -0.017               | 48.01                     | 16.24                 |
| 40089              | McCurtain, OK             | 0.116                | 89.69                     | 91.37                 |
| 40091              | McIntosh, OK              | 0.117                | 89.97                     | 78.28                 |
| 40093              | Major, OK                 | 0.006                | 58.52                     | 32.04                 |
| 40095              | Marshall, OK              | -0.047               | 34.86                     | 85.45                 |
| 40097              | Mayes, OK                 | 0.055                | 76.44                     | 75.19                 |
| 40099              | Murray, OK                | -0.007               | 52.12                     | 70.92                 |
| 40101              | Muskogee, OK              | -0.016               | 48.36                     | 93.38                 |
| 40103              | Noble, OK                 | 0.043                | 73.35                     | 33.85                 |
| 40105              | Nowata, OK                | 0.001                | 56.06                     | 58.95                 |
| 40107              | Okfuskee, OK              | 0.229                | 97.29                     | 92.87                 |
| 40109              | Oklahoma, OK              | -0.113               | 11.65                     | 68.18                 |
| 40111              | Okmulgee, OK              | 0.042                | 72.94                     | 86.59                 |
| 40113              | Osage, OK                 | 0.046                | 74.15                     | 62.39                 |
| 40115              | Ottawa, OK                | 0.027                | 67.21                     | 95.76                 |
| 40117              | Pawnee, OK                | 0.077                | 82.39                     | 54.24                 |
| 40119              | Payne, OK                 | 0.083                | 83.64                     | 51.31                 |

| <b>County FIPS</b> | <b>County Description</b> | <b>DOS-SVI Index</b> | <b>DOS-SVI Percentile</b> | <b>SVI Percentile</b> |
|--------------------|---------------------------|----------------------|---------------------------|-----------------------|
| 40121              | Pittsburg, OK             | 0.016                | 62.4                      | 82.64                 |
| 40123              | Pontotoc, OK              | -0.015               | 48.87                     | 65                    |
| 40125              | Pottawatomic, OK          | 0.051                | 75.33                     | 78.15                 |
| 40127              | Pushmataha, OK            | 0.09                 | 84.69                     | 78.63                 |
| 40129              | Roger Mills, OK           | 0.008                | 59.15                     | 40.03                 |
| 40131              | Rogers, OK                | -0.009               | 51.16                     | 28.34                 |
| 40133              | Seminole, OK              | 0.078                | 82.49                     | 92.9                  |
| 40135              | Sequoyah, OK              | 0.1                  | 86.88                     | 91.59                 |
| 40137              | Stephens, OK              | -0.05                | 33.52                     | 60.51                 |
| 40139              | Texas, OK                 | -0.022               | 45.75                     | 82.1                  |
| 40141              | Tillman, OK               | -0.035               | 40.91                     | 87.1                  |
| 40143              | Tulsa, OK                 | -0.114               | 11.4                      | 61.59                 |
| 40145              | Wagoner, OK               | 0.017                | 62.66                     | 42.45                 |
| 40147              | Washington, OK            | -0.08                | 20.73                     | 43.82                 |
| 40149              | Washita, OK               | 0.026                | 66.92                     | 40.45                 |
| 40151              | Woods, OK                 | -0.085               | 18.69                     | 31.4                  |
| 40153              | Woodward, OK              | 0.006                | 58.07                     | 57.45                 |
| 41001              | Baker, OR                 | 0.061                | 78.03                     | 68.54                 |
| 41003              | Benton, OR                | -0.022               | 45.65                     | 34.9                  |
| 41005              | Clackamas, OR             | -0.073               | 23.56                     | 18.95                 |
| 41007              | Clatsop, OR               | -0.04                | 38.33                     | 51.85                 |
| 41009              | Columbia, OR              | 0.003                | 56.51                     | 40.25                 |
| 41011              | Coos, OR                  | 0.004                | 57.18                     | 74.3                  |
| 41013              | Crook, OR                 | 0.038                | 71.67                     | 57.29                 |
| 41015              | Curry, OR                 | -0.135               | 7.13                      | 48.79                 |
| 41017              | Deschutes, OR             | -0.056               | 31.42                     | 16.37                 |
| 41019              | Douglas, OR               | 0.021                | 64.31                     | 72.77                 |
| 41021              | Gilliam, OR               | -0.018               | 47.41                     | 50.92                 |
| 41023              | Grant, OR                 | 0.01                 | 59.92                     | 54.65                 |
| 41025              | Harney, OR                | 0.104                | 87.58                     | 71.08                 |
| 41027              | Hood River, OR            | -0.004               | 53.77                     | 54.55                 |
| 41029              | Jackson, OR               | -0.029               | 42.82                     | 73.54                 |
| 41031              | Jefferson, OR             | 0.111                | 89.14                     | 91.18                 |
| 41033              | Josephine, OR             | 0.084                | 83.83                     | 65.57                 |
| 41035              | Klamath, OR               | 0.048                | 74.44                     | 86.88                 |
| 41037              | Lake, OR                  | 0.068                | 80.29                     | 76.08                 |
| 41039              | Lane, OR                  | -0.039               | 38.49                     | 64.9                  |
| 41041              | Lincoln, OR               | -0.075               | 22.64                     | 55.22                 |
| 41043              | Linn, OR                  | 0.023                | 65.3                      | 67.9                  |
| 41045              | Malheur, OR               | 0.164                | 94.3                      | 99.65                 |
| 41047              | Marion, OR                | -0.003               | 54.03                     | 85.35                 |
| 41049              | Morrow, OR                | 0.187                | 95.8                      | 76.43                 |
| 41051              | Multnomah, OR             | -0.084               | 18.88                     | 46.75                 |
| 41053              | Polk, OR                  | -0.043               | 37.09                     | 57.77                 |
| 41055              | Sherman, OR               | -0.153               | 4.68                      | 13.5                  |
| 41057              | Tillamook, OR             | -0.018               | 47.44                     | 65.86                 |
| 41059              | Umatilla, OR              | 0.121                | 90.61                     | 96.88                 |
| 41061              | Union, OR                 | 0.045                | 73.77                     | 67.29                 |
| 41063              | Wallowa, OR               | -0.041               | 37.63                     | 50.32                 |
| 41065              | Wasco, OR                 | -0.025               | 44.16                     | 83.89                 |
| 41067              | Washington, OR            | -0.084               | 18.91                     | 31.94                 |
| 41069              | Wheeler, OR               | -0.1                 | 14.68                     | 39.01                 |
| 41071              | Yamhill, OR               | 0.027                | 67.3                      | 66.08                 |
| 42001              | Adams, PA                 | -0.04                | 38.24                     | 21.18                 |
| 42003              | Allegheny, PA             | -0.082               | 20.02                     | 25.06                 |

| <b>County FIPS</b> | <b>County Description</b> | <b>DOS-SVI Index</b> | <b>DOS-SVI Percentile</b> | <b>SVI Percentile</b> |
|--------------------|---------------------------|----------------------|---------------------------|-----------------------|
| 42005              | Armstrong, PA             | -0.021               | 46.1                      | 24.75                 |
| 42007              | Beaver, PA                | -0.066               | 26.71                     | 24.81                 |
| 42009              | Bedford, PA               | 0.003                | 56.48                     | 27.29                 |
| 42011              | Berks, PA                 | -0.103               | 13.95                     | 61.62                 |
| 42013              | Blair, PA                 | -0.043               | 36.87                     | 39.81                 |
| 42015              | Bradford, PA              | 0.008                | 59.25                     | 34.71                 |
| 42017              | Bucks, PA                 | -0.134               | 7.42                      | 8.31                  |
| 42019              | Butler, PA                | -0.036               | 40.34                     | 7.9                   |
| 42021              | Cambria, PA               | -0.001               | 55.08                     | 48.92                 |
| 42023              | Cameron, PA               | -0.101               | 14.45                     | 30.06                 |
| 42025              | Carbon, PA                | -0.027               | 43.55                     | 30.48                 |
| 42027              | Centre, PA                | 0.054                | 76.41                     | 28.92                 |
| 42029              | Chester, PA               | -0.098               | 15.15                     | 14.36                 |
| 42031              | Clarion, PA               | 0.015                | 61.73                     | 47.71                 |
| 42033              | Clearfield, PA            | 0.03                 | 68.74                     | 60.54                 |
| 42035              | Clinton, PA               | 0.045                | 73.73                     | 48.6                  |
| 42037              | Columbia, PA              | -0.042               | 37.22                     | 27.68                 |
| 42039              | Crawford, PA              | 0.041                | 72.88                     | 50.64                 |
| 42041              | Cumberland, PA            | -0.075               | 22.6                      | 16.15                 |
| 42043              | Dauphin, PA               | -0.107               | 13.02                     | 49.75                 |
| 42045              | Delaware, PA              | -0.082               | 19.93                     | 41.31                 |
| 42047              | Elk, PA                   | -0.067               | 26.11                     | 11.66                 |
| 42049              | Erie, PA                  | -0.026               | 44.09                     | 61.94                 |
| 42051              | Fayette, PA               | 0.01                 | 59.95                     | 62.48                 |
| 42053              | Forest, PA                | 0.382                | 99.01                     | 71.15                 |
| 42055              | Franklin, PA              | -0.051               | 33.17                     | 33.73                 |
| 42057              | Fulton, PA                | -0.023               | 45.34                     | 22.01                 |
| 42059              | Greene, PA                | 0.052                | 75.61                     | 43.5                  |
| 42061              | Huntingdon, PA            | 0.062                | 78.57                     | 49.08                 |
| 42063              | Indiana, PA               | 0.067                | 79.81                     | 54.84                 |
| 42065              | Jefferson, PA             | -0.026               | 44.06                     | 33.12                 |
| 42067              | Juniata, PA               | 0.021                | 64.34                     | 44.84                 |
| 42069              | Lackawanna, PA            | -0.058               | 30.47                     | 52.52                 |
| 42071              | Lancaster, PA             | -0.014               | 49.32                     | 45.73                 |
| 42073              | Lawrence, PA              | -0.055               | 31.58                     | 46.94                 |
| 42075              | Lebanon, PA               | -0.038               | 38.97                     | 53.28                 |
| 42077              | Lehigh, PA                | -0.122               | 9.58                      | 63.5                  |
| 42079              | Luzerne, PA               | -0.079               | 21.3                      | 60.89                 |
| 42081              | Lycoming, PA              | -0.025               | 44.28                     | 42.1                  |
| 42083              | McKean, PA                | 0.019                | 63.32                     | 54.62                 |
| 42085              | Mercer, PA                | 0.014                | 61.48                     | 54.2                  |
| 42087              | Mifflin, PA               | 0.012                | 60.81                     | 47.23                 |
| 42089              | Monroe, PA                | -0.058               | 30.56                     | 30.64                 |
| 42091              | Montgomery, PA            | -0.148               | 5.32                      | 16.53                 |
| 42093              | Montour, PA               | -0.013               | 49.73                     | 31.11                 |
| 42095              | Northampton, PA           | -0.11                | 12.29                     | 28.76                 |
| 42097              | Northumberland, PA        | -0.007               | 51.93                     | 50.06                 |
| 42099              | Perry, PA                 | -0.02                | 46.32                     | 10.89                 |
| 42101              | Philadelphia, PA          | 0.025                | 66.28                     | 92.04                 |
| 42103              | Pike, PA                  | -0.115               | 11.14                     | 12.87                 |
| 42105              | Potter, PA                | -0.009               | 51.19                     | 44.17                 |
| 42107              | Schuylkill, PA            | -0.027               | 43.78                     | 45.06                 |
| 42109              | Snyder, PA                | 0.021                | 64.66                     | 22.99                 |
| 42111              | Somerset, PA              | 0.017                | 62.56                     | 42.26                 |
| 42113              | Sullivan, PA              | -0.094               | 16.17                     | 35.76                 |

| County FIPS | County Description | DOS-SVI Index | DOS-SVI Percentile | SVI Percentile |
|-------------|--------------------|---------------|--------------------|----------------|
| 42115       | Susquehanna, PA    | -0.052        | 32.79              | 20.64          |
| 42117       | Tioga, PA          | -0.014        | 48.9               | 31.53          |
| 42119       | Union, PA          | 0.144         | 93.06              | 36.05          |
| 42121       | Venango, PA        | -0.017        | 47.69              | 42.29          |
| 42123       | Warren, PA         | -0.05         | 33.43              | 21.34          |
| 42125       | Washington, PA     | -0.041        | 37.82              | 16.94          |
| 42127       | Wayne, PA          | -0.019        | 46.7               | 26.31          |
| 42129       | Westmoreland, PA   | -0.08         | 20.63              | 13.79          |
| 42131       | Wyoming, PA        | -0.03         | 42.53              | 11.21          |
| 42133       | York, PA           | -0.067        | 26.14              | 32.9           |
| 44001       | Bristol, RI        | -0.101        | 14.36              | 12.36          |
| 44003       | Kent, RI           | -0.139        | 6.59               | 15.19          |
| 44005       | Newport, RI        | -0.135        | 7.26               | 17.9           |
| 44007       | Providence, RI     | -0.157        | 4.33               | 75.92          |
| 44009       | Washington, RI     | -0.079        | 21.33              | 8.89           |
| 45001       | Abbeville, SC      | 0.024         | 65.97              | 85.64          |
| 45003       | Aiken, SC          | -0.046        | 35.27              | 66.66          |
| 45005       | Allendale, SC      | 0.215         | 96.82              | 99.3           |
| 45007       | Anderson, SC       | 0.003         | 56.67              | 70.1           |
| 45009       | Bamberg, SC        | -0.042        | 37.28              | 95.16          |
| 45011       | Barnwell, SC       | 0.062         | 78.61              | 99.04          |
| 45013       | Beaufort, SC       | -0.205        | 1.59               | 40.06          |
| 45015       | Berkeley, SC       | -0.057        | 30.98              | 51.46          |
| 45017       | Calhoun, SC        | 0.011         | 60.43              | 56.27          |
| 45019       | Charleston, SC     | -0.135        | 7.32               | 31.56          |
| 45021       | Cherokee, SC       | 0.051         | 75.26              | 69.78          |
| 45023       | Chester, SC        | 0.035         | 70.74              | 73.63          |
| 45025       | Chesterfield, SC   | 0.163         | 94.24              | 94.87          |
| 45027       | Clarendon, SC      | 0.104         | 87.52              | 97.93          |
| 45029       | Colleton, SC       | 0.002         | 56.1               | 80             |
| 45031       | Darlington, SC     | 0.082         | 83.48              | 92.68          |
| 45033       | Dillon, SC         | 0.118         | 90.1               | 96.82          |
| 45035       | Dorchester, SC     | -0.059        | 30.18              | 41.88          |
| 45037       | Edgefield, SC      | -0.013        | 49.89              | 84.84          |
| 45039       | Fairfield, SC      | -0.031        | 42.31              | 74.84          |
| 45041       | Florence, SC       | -0.004        | 53.61              | 89.87          |
| 45043       | Georgetown, SC     | -0.128        | 8.56               | 67.71          |
| 45045       | Greenville, SC     | -0.081        | 20.57              | 50.38          |
| 45047       | Greenwood, SC      | -0.055        | 31.55              | 93.44          |
| 45049       | Hampton, SC        | 0.055         | 76.66              | 80.32          |
| 45051       | Horry, SC          | -0.213        | 1.37               | 61.02          |
| 45053       | Jasper, SC         | -0.055        | 31.52              | 94.49          |
| 45055       | Kershaw, SC        | -0.052        | 32.92              | 49.59          |
| 45057       | Lancaster, SC      | -0.048        | 34.13              | 51.21          |
| 45059       | Laurens, SC        | 0.064         | 79.11              | 91.72          |
| 45061       | Lee, SC            | 0.126         | 91.15              | 92.1           |
| 45063       | Lexington, SC      | -0.024        | 44.8               | 44.2           |
| 45065       | McCormick, SC      | -0.058        | 30.53              | 73.73          |
| 45067       | Marion, SC         | 0.029         | 68.16              | 92.93          |
| 45069       | Marlboro, SC       | 0.161         | 94.11              | 98.69          |
| 45071       | Newberry, SC       | -0.017        | 47.79              | 92.32          |
| 45073       | Oconee, SC         | -0.047        | 34.67              | 72.93          |
| 45075       | Orangeburg, SC     | 0.027         | 67.18              | 92.29          |
| 45077       | Pickens, SC        | 0.011         | 60.52              | 59.9           |
| 45079       | Richland, SC       | -0.115        | 11.21              | 63.09          |

| <b>County FIPS</b> | <b>County Description</b> | <b>DOS-SVI Index</b> | <b>DOS-SVI Percentile</b> | <b>SVI Percentile</b> |
|--------------------|---------------------------|----------------------|---------------------------|-----------------------|
| 45081              | Saluda, SC                | -0.084               | 19.07                     | 79.49                 |
| 45083              | Spartanburg, SC           | -0.018               | 47.47                     | 76.18                 |
| 45085              | Sumter, SC                | 0.043                | 73.42                     | 97.32                 |
| 45087              | Union, SC                 | -0.014               | 49.35                     | 86.78                 |
| 45089              | Williamsburg, SC          | 0.081                | 83.38                     | 97.04                 |
| 45091              | York, SC                  | -0.078               | 21.84                     | 36.62                 |
| 46003              | Aurora, SD                | -0.061               | 29.07                     | 27.26                 |
| 46005              | Beadle, SD                | -0.061               | 28.94                     | 65.06                 |
| 46007              | Bennett, SD               | 0.377                | 98.95                     | 79.27                 |
| 46009              | Bon Homme, SD             | 0.061                | 78.16                     | 23.82                 |
| 46011              | Brookings, SD             | 0.006                | 58.42                     | 15.61                 |
| 46013              | Brown, SD                 | -0.08                | 20.92                     | 32.87                 |
| 46015              | Brule, SD                 | -0.045               | 35.78                     | 57.13                 |
| 46017              | Buffalo, SD               | 0.459                | 99.43                     | 97.1                  |
| 46019              | Butte, SD                 | -0.016               | 48.17                     | 36.27                 |
| 46021              | Campbell, SD              | -0.044               | 36.17                     | 0.64                  |
| 46023              | Charles Mix, SD           | 0.109                | 88.73                     | 73.89                 |
| 46025              | Clark, SD                 | 0.021                | 64.28                     | 17.1                  |
| 46027              | Clay, SD                  | 0.014                | 61.67                     | 24.68                 |
| 46029              | Codington, SD             | -0.025               | 44.19                     | 24.49                 |
| 46031              | Corson, SD                | 0.503                | 99.55                     | 83.95                 |
| 46033              | Custer, SD                | -0.098               | 15.31                     | 22.8                  |
| 46035              | Davison, SD               | -0.073               | 23.69                     | 23.38                 |
| 46037              | Day, SD                   | -0.178               | 2.74                      | 18.5                  |
| 46039              | Deuel, SD                 | -0.06                | 29.58                     | 8.22                  |
| 46041              | Dewey, SD                 | 0.526                | 99.59                     | 88.31                 |
| 46043              | Douglas, SD               | 0.02                 | 64.25                     | 15.03                 |
| 46045              | Edmunds, SD               | 0.006                | 58.39                     | 3.41                  |
| 46047              | Fall River, SD            | -0.104               | 13.69                     | 41.72                 |
| 46049              | Faulk, SD                 | -0.005               | 52.98                     | 7.77                  |
| 46051              | Grant, SD                 | -0.126               | 8.91                      | 5.51                  |
| 46053              | Gregory, SD               | -0.101               | 14.39                     | 28.47                 |
| 46055              | Haakon, SD                | -0.048               | 34                        | 36.24                 |
| 46057              | Hamlin, SD                | 0.09                 | 84.78                     | 15.86                 |
| 46059              | Hand, SD                  | -0.155               | 4.62                      | 3.09                  |
| 46061              | Hanson, SD                | 0.039                | 72.05                     | 0.13                  |
| 46063              | Harding, SD               | 0.058                | 77.36                     | 8.28                  |
| 46065              | Hughes, SD                | 0.036                | 71.19                     | 40.61                 |
| 46067              | Hutchinson, SD            | 0.009                | 59.44                     | 24.87                 |
| 46069              | Hyde, SD                  | -0.041               | 37.95                     | 9.43                  |
| 46071              | Jackson, SD               | 0.457                | 99.33                     | 96.66                 |
| 46073              | Jerauld, SD               | -0.121               | 9.84                      | 5.06                  |
| 46075              | Jones, SD                 | -0.111               | 12.16                     | 0.51                  |
| 46077              | Kingsbury, SD             | -0.116               | 11.05                     | 2.23                  |
| 46079              | Lake, SD                  | 0.019                | 63.61                     | 19.65                 |
| 46081              | Lawrence, SD              | -0.061               | 29.2                      | 26.18                 |
| 46083              | Lincoln, SD               | -0.066               | 26.68                     | 2.01                  |
| 46085              | Lyman, SD                 | 0.155                | 93.79                     | 71.37                 |
| 46087              | McCook, SD                | 0.022                | 65.17                     | 22.29                 |
| 46089              | McPherson, SD             | -0.037               | 39.8                      | 28.89                 |
| 46091              | Marshall, SD              | -0.042               | 37.19                     | 21.31                 |
| 46093              | Meade, SD                 | 0.002                | 56.32                     | 8.92                  |
| 46095              | Mellette, SD              | 0.386                | 99.08                     | 91.56                 |
| 46097              | Miner, SD                 | 0.035                | 70.77                     | 10.57                 |
| 46099              | Minnehaha, SD             | -0.102               | 14.14                     | 35.89                 |

| <b>County FIPS</b> | <b>County Description</b> | <b>DOS-SVI Index</b> | <b>DOS-SVI Percentile</b> | <b>SVI Percentile</b> |
|--------------------|---------------------------|----------------------|---------------------------|-----------------------|
| 46101              | Moody, SD                 | -0.029               | 42.69                     | 39.08                 |
| 46102              | Oglala Lakota, SD         | 1.438                | 99.84                     | 99.43                 |
| 46103              | Pennington, SD            | -0.057               | 30.82                     | 41.62                 |
| 46105              | Perkins, SD               | -0.014               | 49.16                     | 10.96                 |
| 46107              | Potter, SD                | -0.087               | 18.15                     | 5.16                  |
| 46109              | Roberts, SD               | -0.08                | 20.69                     | 71.78                 |
| 46111              | Sanborn, SD               | -0.086               | 18.43                     | 3.85                  |
| 46115              | Spink, SD                 | -0.075               | 22.7                      | 17.68                 |
| 46117              | Stanley, SD               | -0.086               | 18.4                      | 10.99                 |
| 46119              | Sully, SD                 | -0.11                | 12.26                     | 0.73                  |
| 46121              | Todd, SD                  | 0.538                | 99.62                     | 95.64                 |
| 46123              | Tripp, SD                 | -0.129               | 8.5                       | 34.11                 |
| 46125              | Turner, SD                | -0.087               | 18.18                     | 10.8                  |
| 46127              | Union, SD                 | -0.151               | 4.93                      | 2.74                  |
| 46129              | Walworth, SD              | 0.046                | 74.12                     | 39.39                 |
| 46135              | Yankton, SD               | -0.104               | 13.59                     | 31.59                 |
| 46137              | Ziebach, SD               | 0.648                | 99.68                     | 95.38                 |
| 47001              | Anderson, TN              | -0.065               | 26.93                     | 60.64                 |
| 47003              | Bedford, TN               | 0.031                | 68.89                     | 77.58                 |
| 47005              | Benton, TN                | 0.029                | 68.13                     | 70.29                 |
| 47007              | Bledsoe, TN               | 0.096                | 85.99                     | 81.59                 |
| 47009              | Blount, TN                | -0.045               | 36.04                     | 24.52                 |
| 47011              | Bradley, TN               | 0.003                | 56.61                     | 69.14                 |
| 47013              | Campbell, TN              | -0.016               | 48.2                      | 73.38                 |
| 47015              | Cannon, TN                | 0.036                | 70.84                     | 37.04                 |
| 47017              | Carroll, TN               | 0.029                | 68.19                     | 74.43                 |
| 47019              | Carter, TN                | -0.024               | 44.99                     | 61.53                 |
| 47021              | Cheatham, TN              | -0.008               | 51.7                      | 23.69                 |
| 47023              | Chester, TN               | 0.071                | 81.12                     | 64.36                 |
| 47025              | Claiborne, TN             | 0.051                | 75.52                     | 71.02                 |
| 47027              | Clay, TN                  | -0.012               | 50.02                     | 59.39                 |
| 47029              | Cocke, TN                 | 0.001                | 55.94                     | 68.57                 |
| 47031              | Coffee, TN                | 0.031                | 68.96                     | 49.14                 |
| 47033              | Crockett, TN              | 0.03                 | 68.48                     | 78.12                 |
| 47035              | Cumberland, TN            | -0.09                | 17.07                     | 53.73                 |
| 47037              | Davidson, TN              | -0.206               | 1.56                      | 53.63                 |
| 47039              | Decatur, TN               | 0                    | 55.65                     | 50.86                 |
| 47041              | DeKalb, TN                | 0.032                | 69.63                     | 43.06                 |
| 47043              | Dickson, TN               | 0.042                | 73.1                      | 42.9                  |
| 47045              | Dyer, TN                  | -0.035               | 40.43                     | 75.96                 |
| 47047              | Fayette, TN               | -0.078               | 21.65                     | 25.54                 |
| 47049              | Fentress, TN              | 0.124                | 90.96                     | 63.73                 |
| 47051              | Franklin, TN              | -0.022               | 45.69                     | 37.64                 |
| 47053              | Gibson, TN                | -0.017               | 47.82                     | 73.5                  |
| 47055              | Giles, TN                 | 0.004                | 57.27                     | 60.32                 |
| 47057              | Grainger, TN              | 0.081                | 83.29                     | 59.3                  |
| 47059              | Greene, TN                | 0.005                | 57.5                      | 54.46                 |
| 47061              | Grundy, TN                | 0.065                | 79.43                     | 86.85                 |
| 47063              | Hamblen, TN               | 0.004                | 56.96                     | 81.46                 |
| 47065              | Hamilton, TN              | -0.1                 | 14.77                     | 41.37                 |
| 47067              | Hancock, TN               | 0.062                | 78.45                     | 76.66                 |
| 47069              | Hardeman, TN              | 0.108                | 88.47                     | 86.72                 |
| 47071              | Hardin, TN                | 0.001                | 55.87                     | 70.64                 |
| 47073              | Hawkins, TN               | 0.006                | 57.98                     | 70.8                  |
| 47075              | Haywood, TN               | -0.043               | 37.12                     | 87.17                 |

| <b>County FIPS</b> | <b>County Description</b> | <b>DOS-SVI Index</b> | <b>DOS-SVI Percentile</b> | <b>SVI Percentile</b> |
|--------------------|---------------------------|----------------------|---------------------------|-----------------------|
| 47077              | Henderson, TN             | 0.103                | 87.3                      | 69.81                 |
| 47079              | Henry, TN                 | -0.034               | 41.2                      | 63.47                 |
| 47081              | Hickman, TN               | 0.077                | 82.3                      | 56.62                 |
| 47083              | Houston, TN               | 0.033                | 70.07                     | 55.51                 |
| 47085              | Humphreys, TN             | 0.043                | 73.38                     | 36.88                 |
| 47087              | Jackson, TN               | 0.044                | 73.67                     | 60                    |
| 47089              | Jefferson, TN             | 0.041                | 72.59                     | 56.08                 |
| 47091              | Johnson, TN               | 0.061                | 78.19                     | 56.53                 |
| 47093              | Knox, TN                  | -0.103               | 13.85                     | 30.35                 |
| 47095              | Lake, TN                  | 0.228                | 97.2                      | 91.85                 |
| 47097              | Lauderdale, TN            | 0.119                | 90.16                     | 96.72                 |
| 47099              | Lawrence, TN              | 0.1                  | 86.82                     | 83.18                 |
| 47101              | Lewis, TN                 | 0.049                | 74.75                     | 63.63                 |
| 47103              | Lincoln, TN               | 0.02                 | 63.96                     | 67.77                 |
| 47105              | Loudon, TN                | -0.065               | 27.32                     | 38.63                 |
| 47107              | McMinn, TN                | 0.02                 | 64.09                     | 65.51                 |
| 47109              | McNairy, TN               | 0.098                | 86.44                     | 71.72                 |
| 47111              | Macon, TN                 | -0.009               | 50.88                     | 69.27                 |
| 47113              | Madison, TN               | -0.063               | 28.08                     | 71.24                 |
| 47115              | Marion, TN                | 0.003                | 56.64                     | 50.61                 |
| 47117              | Marshall, TN              | -0.018               | 47.21                     | 60.99                 |
| 47119              | Maury, TN                 | -0.017               | 47.66                     | 39.49                 |
| 47121              | Meigs, TN                 | 0.114                | 89.46                     | 49.33                 |
| 47123              | Monroe, TN                | 0.106                | 88.06                     | 64.78                 |
| 47125              | Montgomery, TN            | -0.009               | 50.84                     | 51.72                 |
| 47127              | Moore, TN                 | -0.009               | 51.23                     | 9.14                  |
| 47129              | Morgan, TN                | 0.183                | 95.51                     | 74.94                 |
| 47131              | Obion, TN                 | -0.019               | 46.67                     | 76.94                 |
| 47133              | Overton, TN               | 0.06                 | 77.81                     | 45.76                 |
| 47135              | Perry, TN                 | 0.108                | 88.51                     | 67.99                 |
| 47137              | Pickett, TN               | 0.008                | 59.12                     | 41.53                 |
| 47139              | Polk, TN                  | 0.064                | 79.27                     | 49.04                 |
| 47141              | Putnam, TN                | -0.055               | 31.65                     | 61.82                 |
| 47143              | Rhea, TN                  | 0.044                | 73.61                     | 82.07                 |
| 47145              | Roane, TN                 | 0.018                | 63.23                     | 38.44                 |
| 47147              | Robertson, TN             | 0.013                | 61.19                     | 42.87                 |
| 47149              | Rutherford, TN            | -0.068               | 25.95                     | 32.68                 |
| 47151              | Scott, TN                 | 0.014                | 61.41                     | 76.37                 |
| 47153              | Sequatchie, TN            | 0.066                | 79.56                     | 57.2                  |
| 47155              | Sevier, TN                | -0.047               | 34.73                     | 61.11                 |
| 47157              | Shelby, TN                | -0.121               | 9.68                      | 78.47                 |
| 47159              | Smith, TN                 | 0.013                | 61.38                     | 26.08                 |
| 47161              | Stewart, TN               | 0.03                 | 68.67                     | 40.86                 |
| 47163              | Sullivan, TN              | -0.048               | 34.19                     | 54.11                 |
| 47165              | Sumner, TN                | -0.087               | 18.08                     | 20.57                 |
| 47167              | Tipton, TN                | 0.002                | 56.13                     | 45                    |
| 47169              | Trousdale, TN             | -0.011               | 50.27                     | 52.2                  |
| 47171              | Unicoi, TN                | -0.055               | 31.77                     | 79.81                 |
| 47173              | Union, TN                 | 0.131                | 91.63                     | 66.72                 |
| 47175              | Van Buren, TN             | 0.165                | 94.4                      | 60.25                 |
| 47177              | Warren, TN                | -0.015               | 48.42                     | 83.22                 |
| 47179              | Washington, TN            | -0.069               | 25.06                     | 45.89                 |
| 47181              | Wayne, TN                 | 0.173                | 94.78                     | 76.24                 |
| 47183              | Weakley, TN               | 0.03                 | 68.77                     | 65.83                 |
| 47185              | White, TN                 | 0.066                | 79.72                     | 59.84                 |



| County FIPS | County Description | DOS-SVI Index | DOS-SVI Percentile | SVI Percentile |
|-------------|--------------------|---------------|--------------------|----------------|
| 47187       | Williamson, TN     | -0.051        | 33.05              | 2.1            |
| 47189       | Wilson, TN         | -0.061        | 28.81              | 14.65          |
| 48001       | Anderson, TX       | 0.194         | 96.15              | 79.46          |
| 48003       | Andrews, TX        | 0.15          | 93.44              | 47.36          |
| 48005       | Angelina, TX       | 0.057         | 77.27              | 97.71          |
| 48007       | Aransas, TX        | -0.063        | 27.98              | 80.19          |
| 48009       | Archer, TX         | -0.043        | 36.84              | 8.98           |
| 48011       | Armstrong, TX      | -0.046        | 35.59              | 15.99          |
| 48013       | Atascosa, TX       | 0.193         | 96.05              | 84.97          |
| 48015       | Austin, TX         | 0.031         | 68.93              | 49.36          |
| 48017       | Bailey, TX         | -0.043        | 36.8               | 80.03          |
| 48019       | Bandera, TX        | -0.061        | 29.29              | 50.76          |
| 48021       | Bastrop, TX        | 0.117         | 89.91              | 74.59          |
| 48023       | Baylor, TX         | -0.1          | 14.84              | 15.54          |
| 48025       | Bee, TX            | 0.302         | 98.47              | 96.94          |
| 48027       | Bell, TX           | 0.019         | 63.52              | 80.51          |
| 48029       | Bexar, TX          | -0.139        | 6.72               | 82.58          |
| 48031       | Blanco, TX         | -0.023        | 45.21              | 27.83          |
| 48033       | Borden, TX         | -0.066        | 26.43              | 6.21           |
| 48035       | Bosque, TX         | -0.026        | 43.87              | 61.75          |
| 48037       | Bowie, TX          | 0.034         | 70.3               | 85.29          |
| 48039       | Brazoria, TX       | -0.037        | 39.54              | 51.34          |
| 48041       | Brazos, TX         | -0.079        | 21.04              | 65.32          |
| 48043       | Brewster, TX       | -0.07         | 24.9               | 65.73          |
| 48045       | Briscoe, TX        | -0.19         | 2.07               | 45.64          |
| 48047       | Brooks, TX         | -0.035        | 40.94              | 100            |
| 48049       | Brown, TX          | -0.022        | 45.59              | 62.77          |
| 48051       | Burleson, TX       | 0.118         | 90                 | 60.8           |
| 48053       | Burnet, TX         | -0.06         | 29.55              | 52.99          |
| 48055       | Caldwell, TX       | 0.116         | 89.75              | 87.32          |
| 48057       | Calhoun, TX        | 0.096         | 85.9               | 86.18          |
| 48059       | Callahan, TX       | 0.04          | 72.46              | 29.68          |
| 48061       | Cameron, TX        | -0.014        | 49.22              | 97.58          |
| 48063       | Camp, TX           | 0.072         | 81.28              | 90.19          |
| 48065       | Carson, TX         | -0.087        | 18.05              | 3.38           |
| 48067       | Cass, TX           | 0.123         | 90.86              | 78.41          |
| 48069       | Castro, TX         | -0.073        | 23.72              | 77.74          |
| 48071       | Chambers, TX       | 0.024         | 65.9               | 41.08          |
| 48073       | Cherokee, TX       | 0.134         | 91.79              | 91.91          |
| 48075       | Childress, TX      | 0.093         | 85.45              | 75             |
| 48077       | Clay, TX           | 0.022         | 64.92              | 31.82          |
| 48079       | Cochran, TX        | 0.003         | 56.45              | 86.08          |
| 48081       | Coke, TX           | -0.102        | 14.2               | 62.04          |
| 48083       | Coleman, TX        | -0.136        | 7.04               | 41.85          |
| 48085       | Collin, TX         | -0.161        | 3.88               | 15.06          |
| 48087       | Collingsworth, TX  | 0.006         | 58.55              | 88.76          |
| 48089       | Colorado, TX       | 0.063         | 78.89              | 68.47          |
| 48091       | Comal, TX          | -0.097        | 15.44              | 23.79          |
| 48093       | Comanche, TX       | -0.065        | 26.81              | 72.64          |
| 48095       | Concho, TX         | -0.15         | 5.16               | 42.83          |
| 48097       | Cooke, TX          | 0.005         | 57.72              | 62.26          |
| 48099       | Coryell, TX        | 0.174         | 94.81              | 78.09          |
| 48101       | Cottle, TX         | 0.054         | 76.38              | 93.63          |
| 48103       | Crane, TX          | 0.06          | 77.87              | 47.39          |
| 48105       | Crockett, TX       | -0.078        | 21.71              | 68.92          |

| <b>County FIPS</b> | <b>County Description</b> | <b>DOS-SVI Index</b> | <b>DOS-SVI Percentile</b> | <b>SVI Percentile</b> |
|--------------------|---------------------------|----------------------|---------------------------|-----------------------|
| 48107              | Crosby, TX                | 0.101                | 87.04                     | 93.95                 |
| 48109              | Culberson, TX             | -0.094               | 16.11                     | 99.71                 |
| 48111              | Dallam, TX                | -0.186               | 2.2                       | 55.03                 |
| 48113              | Dallas, TX                | -0.199               | 1.78                      | 75.38                 |
| 48115              | Dawson, TX                | 0.061                | 78.13                     | 94.75                 |
| 48117              | Deaf Smith, TX            | -0.114               | 11.3                      | 84.11                 |
| 48119              | Delta, TX                 | 0.025                | 66.38                     | 57.04                 |
| 48121              | Denton, TX                | -0.139               | 6.53                      | 22.1                  |
| 48123              | DeWitt, TX                | 0.078                | 82.68                     | 82.29                 |
| 48125              | Dickens, TX               | 0.158                | 93.86                     | 87.96                 |
| 48127              | Dimmit, TX                | 0.179                | 95.13                     | 99.97                 |
| 48129              | Donley, TX                | 0.015                | 62.15                     | 45.25                 |
| 48131              | Duval, TX                 | 0.046                | 74.02                     | 99.94                 |
| 48133              | Eastland, TX              | 0.04                 | 72.24                     | 80.67                 |
| 48135              | Ector, TX                 | -0.042               | 37.34                     | 79.24                 |
| 48137              | Edwards, TX               | -0.127               | 8.82                      | 43.85                 |
| 48139              | Ellis, TX                 | -0.027               | 43.81                     | 39.24                 |
| 48141              | El Paso, TX               | -0.197               | 1.85                      | 95.35                 |
| 48143              | Erath, TX                 | -0.005               | 53.2                      | 62.52                 |
| 48145              | Falls, TX                 | 0.178                | 95.1                      | 97.99                 |
| 48147              | Fannin, TX                | 0.061                | 78.25                     | 57.58                 |
| 48149              | Fayette, TX               | -0.096               | 15.66                     | 43.63                 |
| 48151              | Fisher, TX                | -0.073               | 23.75                     | 43.12                 |
| 48153              | Floyd, TX                 | 0.017                | 62.85                     | 82.99                 |
| 48155              | Foard, TX                 | -0.059               | 30.12                     | 47.83                 |
| 48157              | Fort Bend, TX             | -0.101               | 14.49                     | 28.73                 |
| 48159              | Franklin, TX              | 0.027                | 67.08                     | 52.77                 |
| 48161              | Freestone, TX             | 0.062                | 78.73                     | 84.3                  |
| 48163              | Frio, TX                  | 0.088                | 84.37                     | 98.66                 |
| 48165              | Gaines, TX                | 0.148                | 93.38                     | 68.25                 |
| 48167              | Galveston, TX             | -0.095               | 15.76                     | 58.5                  |
| 48169              | Garza, TX                 | -0.099               | 14.87                     | 72.13                 |
| 48171              | Gillespie, TX             | -0.09                | 17.26                     | 35.73                 |
| 48173              | Glasscock, TX             | -0.149               | 5.22                      | 17.61                 |
| 48175              | Goliad, TX                | -0.01                | 50.49                     | 58.15                 |
| 48177              | Gonzales, TX              | 0.167                | 94.43                     | 89.59                 |
| 48179              | Gray, TX                  | 0.033                | 70.04                     | 84.46                 |
| 48181              | Grayson, TX               | -0.024               | 44.83                     | 65.92                 |
| 48183              | Gregg, TX                 | -0.062               | 28.53                     | 88.25                 |
| 48185              | Grimes, TX                | 0.093                | 85.48                     | 86.02                 |
| 48187              | Guadalupe, TX             | -0.054               | 31.93                     | 43.44                 |
| 48189              | Hale, TX                  | 0.071                | 80.77                     | 93.12                 |
| 48191              | Hall, TX                  | -0.105               | 13.37                     | 95                    |
| 48193              | Hamilton, TX              | -0.102               | 14.26                     | 60.83                 |
| 48195              | Hansford, TX              | -0.147               | 5.54                      | 76.15                 |
| 48197              | Hardeman, TX              | -0.032               | 41.9                      | 72.8                  |
| 48199              | Hardin, TX                | 0.036                | 71.06                     | 25.32                 |
| 48201              | Harris, TX                | -0.227               | 1.08                      | 72.36                 |
| 48203              | Harrison, TX              | 0.069                | 80.39                     | 73.06                 |
| 48205              | Hartley, TX               | 0.191                | 95.89                     | 53.44                 |
| 48207              | Haskell, TX               | -0.051               | 33.14                     | 97.55                 |
| 48209              | Hays, TX                  | -0.031               | 42.09                     | 49.24                 |
| 48211              | Hemphill, TX              | 0.078                | 82.58                     | 74.27                 |
| 48213              | Henderson, TX             | 0.01                 | 59.88                     | 72.01                 |
| 48215              | Hidalgo, TX               | 0.061                | 78.1                      | 97.8                  |

| County FIPS | County Description | DOS-SVI Index | DOS-SVI Percentile | SVI Percentile |
|-------------|--------------------|---------------|--------------------|----------------|
| 48217       | Hill, TX           | 0.092         | 85.16              | 87.07          |
| 48219       | Hockley, TX        | 0.099         | 86.66              | 90.25          |
| 48221       | Hood, TX           | -0.083        | 19.83              | 26.02          |
| 48223       | Hopkins, TX        | 0.006         | 57.91              | 70.67          |
| 48225       | Houston, TX        | 0.065         | 79.37              | 91.31          |
| 48227       | Howard, TX         | -0.041        | 37.73              | 91.53          |
| 48229       | Hudspeth, TX       | -0.137        | 6.91               | 98.25          |
| 48231       | Hunt, TX           | 0.097         | 86.28              | 83.41          |
| 48233       | Hutchinson, TX     | -0.015        | 48.46              | 66.31          |
| 48235       | Irion, TX          | 0.019         | 63.8               | 20.13          |
| 48237       | Jack, TX           | 0.104         | 87.71              | 65.38          |
| 48239       | Jackson, TX        | 0.127         | 91.25              | 67.74          |
| 48241       | Jasper, TX         | 0.08          | 83.09              | 82.39          |
| 48243       | Jeff Davis, TX     | -0.147        | 5.51               | 36.11          |
| 48245       | Jefferson, TX      | -0.122        | 9.65               | 85.67          |
| 48247       | Jim Hogg, TX       | 0.104         | 87.61              | 99.17          |
| 48249       | Jim Wells, TX      | 0.042         | 73.13              | 92.26          |
| 48251       | Johnson, TX        | 0.036         | 71.25              | 50.73          |
| 48253       | Jones, TX          | 0.228         | 97.26              | 63.28          |
| 48255       | Karnes, TX         | 0.057         | 77.14              | 84.24          |
| 48257       | Kaufman, TX        | 0.049         | 74.72              | 56.91          |
| 48259       | Kendall, TX        | -0.117        | 10.63              | 22.83          |
| 48261       | Kenedy, TX         | -0.29         | 0.35               | 73.28          |
| 48263       | Kent, TX           | -0.019        | 46.83              | 44.27          |
| 48265       | Kerr, TX           | -0.113        | 11.68              | 69.59          |
| 48267       | Kimble, TX         | -0.214        | 1.34               | 58.85          |
| 48269       | King, TX           | -0.083        | 19.55              | 19.55          |
| 48271       | Kinney, TX         | -0.177        | 2.77               | 85.61          |
| 48273       | Kleberg, TX        | 0.096         | 86.18              | 98.34          |
| 48275       | Knox, TX           | -0.033        | 41.48              | 79.62          |
| 48277       | Lamar, TX          | -0.048        | 34.54              | 83.57          |
| 48279       | Lamb, TX           | -0.152        | 4.84               | 89.75          |
| 48281       | Lampasas, TX       | 0.009         | 59.79              | 54.43          |
| 48283       | La Salle, TX       | 0.085         | 83.86              | 81.91          |
| 48285       | Lavaca, TX         | 0.124         | 91.02              | 68.79          |
| 48287       | Lee, TX            | 0.004         | 57.37              | 67.52          |
| 48289       | Leon, TX           | -0.015        | 48.55              | 61.56          |
| 48291       | Liberty, TX        | 0.205         | 96.47              | 94.27          |
| 48293       | Limestone, TX      | 0.06          | 77.91              | 95.32          |
| 48295       | Lipscomb, TX       | -0.005        | 53.23              | 46.05          |
| 48297       | Live Oak, TX       | 0.029         | 68                 | 69.17          |
| 48299       | Llano, TX          | -0.105        | 13.44              | 46.66          |
| 48301       | Loving, TX         | 0.693         | 99.71              | 75.73          |
| 48303       | Lubbock, TX        | -0.082        | 20.22              | 74.97          |
| 48305       | Lynn, TX           | -0.009        | 51.03              | 89.08          |
| 48307       | McCulloch, TX      | -0.139        | 6.62               | 73.95          |
| 48309       | McLennan, TX       | -0.096        | 15.63              | 84.36          |
| 48311       | McMullen, TX       | 0.397         | 99.17              | 76.31          |
| 48313       | Madison, TX        | 0.299         | 98.41              | 83.76          |
| 48315       | Marion, TX         | 0.063         | 79.02              | 68.85          |
| 48317       | Martin, TX         | 0.144         | 93.09              | 42.39          |
| 48319       | Mason, TX          | -0.182        | 2.58               | 35.7           |
| 48321       | Matagorda, TX      | -0.011        | 50.14              | 90.67          |
| 48323       | Maverick, TX       | -0.076        | 22.29              | 97.42          |
| 48325       | Medina, TX         | 0.015         | 61.99              | 66.97          |

| <b>County FIPS</b> | <b>County Description</b> | <b>DOS-SVI Index</b> | <b>DOS-SVI Percentile</b> | <b>SVI Percentile</b> |
|--------------------|---------------------------|----------------------|---------------------------|-----------------------|
| 48327              | Menard, TX                | -0.186               | 2.26                      | 58.54                 |
| 48329              | Midland, TX               | -0.017               | 47.88                     | 47.48                 |
| 48331              | Milam, TX                 | 0.058                | 77.4                      | 76.27                 |
| 48333              | Mills, TX                 | -0.149               | 5.25                      | 76.88                 |
| 48335              | Mitchell, TX              | 0.288                | 98.25                     | 62.13                 |
| 48337              | Montague, TX              | -0.007               | 52.02                     | 58.41                 |
| 48339              | Montgomery, TX            | -0.052               | 32.95                     | 39.14                 |
| 48341              | Moore, TX                 | 0.073                | 81.53                     | 69.9                  |
| 48343              | Morris, TX                | 0.068                | 79.97                     | 72.99                 |
| 48345              | Motley, TX                | 0.037                | 71.28                     | 70.03                 |
| 48347              | Nacogdoches, TX           | 0.061                | 78.35                     | 98.22                 |
| 48349              | Navarro, TX               | 0.005                | 57.47                     | 96.62                 |
| 48351              | Newton, TX                | 0.031                | 69.25                     | 72.07                 |
| 48353              | Nolan, TX                 | 0.101                | 87.01                     | 88.66                 |
| 48355              | Nueces, TX                | -0.035               | 40.72                     | 83.63                 |
| 48357              | Ochiltree, TX             | 0.076                | 82.04                     | 57.87                 |
| 48359              | Oldham, TX                | 0.424                | 99.3                      | 43.22                 |
| 48361              | Orange, TX                | 0.039                | 71.98                     | 58.12                 |
| 48363              | Palo Pinto, TX            | 0.055                | 76.54                     | 87.99                 |
| 48365              | Panola, TX                | 0.054                | 76.31                     | 69.52                 |
| 48367              | Parker, TX                | 0.063                | 78.83                     | 25.61                 |
| 48369              | Parmer, TX                | 0.061                | 78.06                     | 75.76                 |
| 48371              | Pecos, TX                 | 0.084                | 83.67                     | 82.13                 |
| 48373              | Polk, TX                  | 0.053                | 76.12                     | 91.21                 |
| 48375              | Potter, TX                | -0.011               | 50.11                     | 92.48                 |
| 48377              | Presidio, TX              | -0.224               | 1.15                      | 99.81                 |
| 48379              | Rains, TX                 | 0.055                | 76.57                     | 40.16                 |
| 48381              | Randall, TX               | -0.083               | 19.8                      | 22.04                 |
| 48383              | Reagan, TX                | -0.168               | 3.38                      | 48.06                 |
| 48385              | Real, TX                  | -0.114               | 11.49                     | 71.69                 |
| 48387              | Red River, TX             | -0.03                | 42.44                     | 56.5                  |
| 48389              | Reeves, TX                | 0.006                | 58.48                     | 78.03                 |
| 48391              | Refugio, TX               | -0.04                | 38.27                     | 94.14                 |
| 48393              | Roberts, TX               | -0.106               | 13.15                     | 9.11                  |
| 48395              | Robertson, TX             | 0.12                 | 90.39                     | 75.29                 |
| 48397              | Rockwall, TX              | -0.009               | 50.91                     | 11.24                 |
| 48399              | Runnels, TX               | -0.119               | 10.16                     | 54.49                 |
| 48401              | Rusk, TX                  | 0.049                | 74.88                     | 79.65                 |
| 48403              | Sabine, TX                | -0.013               | 49.57                     | 53.09                 |
| 48405              | San Augustine, TX         | 0.07                 | 80.61                     | 88.89                 |
| 48407              | San Jacinto, TX           | 0.109                | 88.76                     | 68.69                 |
| 48409              | San Patricio, TX          | 0.063                | 78.96                     | 83.09                 |
| 48411              | San Saba, TX              | -0.049               | 33.91                     | 73.15                 |
| 48413              | Schleicher, TX            | 0.185                | 95.64                     | 58.57                 |
| 48415              | Scurry, TX                | 0.187                | 95.73                     | 69.94                 |
| 48417              | Shackelford, TX           | 0.154                | 93.63                     | 68.5                  |
| 48419              | Shelby, TX                | 0.027                | 67.24                     | 95.22                 |
| 48421              | Sherman, TX               | -0.081               | 20.34                     | 46.11                 |
| 48423              | Smith, TX                 | -0.052               | 32.47                     | 74.62                 |
| 48425              | Somervell, TX             | 0.178                | 94.97                     | 56.05                 |
| 48427              | Starr, TX                 | 0.004                | 56.83                     | 98.15                 |
| 48429              | Stephens, TX              | -0.045               | 36.1                      | 88.5                  |
| 48431              | Sterling, TX              | -0.175               | 2.9                       | 41.27                 |
| 48433              | Stonewall, TX             | -0.012               | 50.05                     | 32.36                 |
| 48435              | Sutton, TX                | -0.024               | 44.7                      | 60.41                 |

| <b>County FIPS</b> | <b>County Description</b> | <b>DOS-SVI Index</b> | <b>DOS-SVI Percentile</b> | <b>SVI Percentile</b> |
|--------------------|---------------------------|----------------------|---------------------------|-----------------------|
| 48437              | Swisher, TX               | 0.074                | 81.66                     | 97.01                 |
| 48439              | Tarrant, TX               | -0.13                | 8.34                      | 54.75                 |
| 48441              | Taylor, TX                | -0.066               | 26.58                     | 69.33                 |
| 48443              | Terrell, TX               | -0.302               | 0.29                      | 47.13                 |
| 48445              | Terry, TX                 | 0.075                | 81.92                     | 98.76                 |
| 48447              | Throckmorton, TX          | -0.179               | 2.71                      | 26.78                 |
| 48449              | Titus, TX                 | 0.104                | 87.65                     | 89.01                 |
| 48451              | Tom Green, TX             | -0.089               | 17.51                     | 66.43                 |
| 48453              | Travis, TX                | -0.185               | 2.32                      | 38.12                 |
| 48455              | Trinity, TX               | 0.043                | 73.29                     | 80.16                 |
| 48457              | Tyler, TX                 | 0.287                | 98.22                     | 88.34                 |
| 48459              | Upshur, TX                | 0.16                 | 93.98                     | 58.98                 |
| 48461              | Upton, TX                 | -0.097               | 15.38                     | 65.19                 |
| 48463              | Uvalde, TX                | -0.084               | 19.32                     | 95.48                 |
| 48465              | Val Verde, TX             | -0.018               | 47.15                     | 96.78                 |
| 48467              | Van Zandt, TX             | 0.032                | 69.6                      | 55.89                 |
| 48469              | Victoria, TX              | 0.023                | 65.36                     | 78.34                 |
| 48471              | Walker, TX                | 0.109                | 88.57                     | 69.97                 |
| 48473              | Waller, TX                | 0.155                | 93.7                      | 83.31                 |
| 48475              | Ward, TX                  | 0.079                | 82.84                     | 64.94                 |
| 48477              | Washington, TX            | 0.01                 | 60.24                     | 73.12                 |
| 48479              | Webb, TX                  | -0.005               | 52.82                     | 94.97                 |
| 48481              | Wharton, TX               | -0.032               | 41.8                      | 87.58                 |
| 48483              | Wheeler, TX               | 0.004                | 57.24                     | 69.62                 |
| 48485              | Wichita, TX               | 0.01                 | 60.27                     | 81.66                 |
| 48487              | Wilbarger, TX             | -0.065               | 27.09                     | 90.83                 |
| 48489              | Willacy, TX               | 0.112                | 89.3                      | 98.92                 |
| 48491              | Williamson, TX            | -0.113               | 11.84                     | 20.16                 |
| 48493              | Wilson, TX                | 0.116                | 89.65                     | 44.36                 |
| 48495              | Winkler, TX               | -0.086               | 18.46                     | 65.41                 |
| 48497              | Wise, TX                  | 0.064                | 79.18                     | 57.68                 |
| 48499              | Wood, TX                  | -0.075               | 22.95                     | 63.22                 |
| 48501              | Yoakum, TX                | 0.147                | 93.22                     | 49.2                  |
| 48503              | Young, TX                 | -0.044               | 36.36                     | 55.32                 |
| 48505              | Zapata, TX                | 0.26                 | 97.8                      | 98.95                 |
| 48507              | Zavala, TX                | 0.015                | 61.83                     | 99.87                 |
| 49001              | Beaver, UT                | 0.223                | 97.1                      | 25.22                 |
| 49003              | Box Elder, UT             | 0.12                 | 90.29                     | 15.92                 |
| 49005              | Cache, UT                 | 0.126                | 91.09                     | 32.01                 |
| 49007              | Carbon, UT                | 0.079                | 82.81                     | 56.15                 |
| 49009              | Daggett, UT               | 0.343                | 98.69                     | 7.55                  |
| 49011              | Davis, UT                 | 0.086                | 83.95                     | 7.96                  |
| 49013              | Duchesne, UT              | 0.262                | 97.87                     | 48.22                 |
| 49015              | Emery, UT                 | 0.193                | 96.08                     | 26.27                 |
| 49017              | Garfield, UT              | 0.038                | 71.79                     | 45.92                 |
| 49019              | Grand, UT                 | 0.117                | 89.81                     | 52.13                 |
| 49021              | Iron, UT                  | 0.099                | 86.79                     | 45.25                 |
| 49023              | Juab, UT                  | 0.264                | 97.9                      | 23.31                 |
| 49025              | Kane, UT                  | 0.007                | 58.8                      | 10.54                 |
| 49027              | Millard, UT               | 0.088                | 84.3                      | 35.54                 |
| 49029              | Morgan, UT                | 0.141                | 92.68                     | 0.03                  |
| 49031              | Piute, UT                 | 0.011                | 60.3                      | 27.13                 |
| 49033              | Rich, UT                  | 0.137                | 92.17                     | 19.71                 |
| 49035              | Salt Lake, UT             | -0.026               | 44                        | 32.29                 |
| 49037              | San Juan, UT              | 0.293                | 98.34                     | 97.52                 |

| <b>County FIPS</b> | <b>County Description</b> | <b>DOS-SVI Index</b> | <b>DOS-SVI Percentile</b> | <b>SVI Percentile</b> |
|--------------------|---------------------------|----------------------|---------------------------|-----------------------|
| 49039              | Sanpete, UT               | 0.324                | 98.6                      | 60.19                 |
| 49041              | Sevier, UT                | 0.079                | 82.74                     | 32.61                 |
| 49043              | Summit, UT                | -0.155               | 4.42                      | 5                     |
| 49045              | Tooele, UT                | 0.141                | 92.61                     | 31.43                 |
| 49047              | Uintah, UT                | 0.204                | 96.43                     | 48.38                 |
| 49049              | Utah, UT                  | 0.23                 | 97.39                     | 27.8                  |
| 49051              | Wasatch, UT               | 0.113                | 89.4                      | 6.43                  |
| 49053              | Washington, UT            | 0.112                | 89.37                     | 41.43                 |
| 49055              | Wayne, UT                 | 0.109                | 88.67                     | 29.08                 |
| 49057              | Weber, UT                 | 0.028                | 67.69                     | 42.71                 |
| 50001              | Addison, VT               | -0.027               | 43.52                     | 9.65                  |
| 50003              | Bennington, VT            | -0.072               | 23.94                     | 29.24                 |
| 50005              | Caledonia, VT             | -0.007               | 52.18                     | 26.72                 |
| 50007              | Chittenden, VT            | -0.055               | 31.74                     | 18.31                 |
| 50009              | Essex, VT                 | -0.118               | 10.44                     | 20.67                 |
| 50011              | Franklin, VT              | 0.004                | 56.99                     | 11.11                 |
| 50013              | Grand Isle, VT            | -0.095               | 15.86                     | 0.25                  |
| 50015              | Lamoille, VT              | 0.002                | 56.16                     | 13.09                 |
| 50017              | Orange, VT                | -0.007               | 52.21                     | 17.2                  |
| 50019              | Orleans, VT               | -0.039               | 38.62                     | 42.58                 |
| 50021              | Rutland, VT               | 0.107                | 88.12                     | 27.87                 |
| 50023              | Washington, VT            | -0.094               | 15.95                     | 17.52                 |
| 50025              | Windham, VT               | -0.036               | 40.18                     | 30.54                 |
| 50027              | Windsor, VT               | -0.084               | 19.17                     | 12.8                  |
| 51001              | Accomack, VA              | -0.093               | 16.33                     | 80.25                 |
| 51003              | Albemarle, VA             | -0.139               | 6.56                      | 17.32                 |
| 51005              | Alleghany, VA             | -0.071               | 24.51                     | 44.62                 |
| 51007              | Amelia, VA                | 0.004                | 56.73                     | 31.66                 |
| 51009              | Amherst, VA               | 0                    | 55.49                     | 46.82                 |
| 51011              | Appomattox, VA            | -0.074               | 23.53                     | 36.37                 |
| 51013              | Arlington, VA             | -0.299               | 0.32                      | 14.01                 |
| 51015              | Augusta, VA               | -0.053               | 32.28                     | 14.9                  |
| 51017              | Bath, VA                  | -0.031               | 41.96                     | 24.71                 |
| 51019              | Bedford, VA               | -0.06                | 29.61                     | 9.84                  |
| 51021              | Bland, VA                 | 0.11                 | 88.83                     | 34.49                 |
| 51023              | Botetourt, VA             | -0.081               | 20.38                     | 4.14                  |
| 51025              | Brunswick, VA             | -0.054               | 32.03                     | 89.55                 |
| 51027              | Buchanan, VA              | 0.03                 | 68.7                      | 75.45                 |
| 51029              | Buckingham, VA            | 0.051                | 75.42                     | 79.01                 |
| 51031              | Campbell, VA              | -0.088               | 17.77                     | 26.15                 |
| 51033              | Caroline, VA              | 0.021                | 64.72                     | 34.81                 |
| 51035              | Carroll, VA               | -0.087               | 18.31                     | 33.69                 |
| 51036              | Charles City, VA          | -0.172               | 3.06                      | 23.66                 |
| 51037              | Charlotte, VA             | -0.065               | 27.25                     | 70.57                 |
| 51041              | Chesterfield, VA          | -0.152               | 4.78                      | 17.99                 |
| 51043              | Clarke, VA                | -0.16                | 3.95                      | 11.31                 |
| 51045              | Craig, VA                 | -0.081               | 20.28                     | 7.45                  |
| 51047              | Culpeper, VA              | 0.004                | 57.15                     | 48.82                 |
| 51049              | Cumberland, VA            | -0.059               | 29.8                      | 58.31                 |
| 51051              | Dickenson, VA             | 0.032                | 69.75                     | 68.06                 |
| 51053              | Dinwiddie, VA             | -0.061               | 29.04                     | 41.82                 |
| 51057              | Essex, VA                 | -0.16                | 3.98                      | 56.34                 |
| 51059              | Fairfax, VA               | -0.214               | 1.3                       | 18.76                 |
| 51061              | Fauquier, VA              | -0.13                | 8.31                      | 2.87                  |
| 51063              | Floyd, VA                 | -0.056               | 31.23                     | 11.15                 |

| County FIPS | County Description | DOS-SVI Index | DOS-SVI Percentile | SVI Percentile |
|-------------|--------------------|---------------|--------------------|----------------|
| 51065       | Fluvanna, VA       | -0.077        | 22.03              | 6.31           |
| 51067       | Franklin, VA       | -0.049        | 33.72              | 40.1           |
| 51069       | Frederick, VA      | -0.059        | 30.02              | 18.22          |
| 51071       | Giles, VA          | -0.1          | 14.8               | 27.42          |
| 51073       | Gloucester, VA     | -0.077        | 22.09              | 3.66           |
| 51075       | Goochland, VA      | -0.112        | 12                 | 4.59           |
| 51077       | Grayson, VA        | 0.005         | 57.75              | 64.59          |
| 51079       | Greene, VA         | 0.001         | 55.84              | 16.31          |
| 51081       | Greensville, VA    | 0.163         | 94.27              | 81.4           |
| 51083       | Halifax, VA        | -0.064        | 27.76              | 67.23          |
| 51085       | Hanover, VA        | -0.106        | 13.21              | 1.56           |
| 51087       | Henrico, VA        | -0.193        | 2.01               | 25.73          |
| 51089       | Henry, VA          | -0.001        | 55.05              | 88.57          |
| 51091       | Highland, VA       | -0.23         | 0.99               | 6.5            |
| 51093       | Isle of Wight, VA  | -0.074        | 23.08              | 33.92          |
| 51095       | James City, VA     | -0.197        | 1.88               | 11.5           |
| 51097       | King and Queen, VA | -0.084        | 19.1               | 32.45          |
| 51099       | King George, VA    | -0.027        | 43.59              | 1.59           |
| 51101       | King William, VA   | -0.064        | 27.6               | 3.57           |
| 51103       | Lancaster, VA      | -0.245        | 0.7                | 15.83          |
| 51105       | Lee, VA            | 0.105         | 87.9               | 80.73          |
| 51107       | Loudoun, VA        | -0.117        | 10.79              | 9.04           |
| 51109       | Louisa, VA         | -0.022        | 45.46              | 33.25          |
| 51111       | Lunenburg, VA      | 0.021         | 64.53              | 86.43          |
| 51113       | Madison, VA        | 0.029         | 67.88              | 16.4           |
| 51115       | Mathews, VA        | -0.184        | 2.39               | 2.07           |
| 51117       | Mecklenburg, VA    | -0.093        | 16.4               | 77.68          |
| 51119       | Middlesex, VA      | -0.1          | 14.61              | 20.25          |
| 51121       | Montgomery, VA     | -0.029        | 43.04              | 29.59          |
| 51125       | Nelson, VA         | -0.147        | 5.6                | 30             |
| 51127       | New Kent, VA       | -0.02         | 46.42              | 0.61           |
| 51131       | Northampton, VA    | -0.181        | 2.64               | 67.64          |
| 51133       | Northumberland, VA | -0.265        | 0.54               | 12.13          |
| 51135       | Nottoway, VA       | 0.011         | 60.55              | 90.96          |
| 51137       | Orange, VA         | -0.065        | 26.77              | 46.5           |
| 51139       | Page, VA           | -0.008        | 51.58              | 39.36          |
| 51141       | Patrick, VA        | -0.023        | 45.08              | 63.89          |
| 51143       | Pittsylvania, VA   | -0.053        | 32.16              | 64.27          |
| 51145       | Powhatan, VA       | -0.044        | 36.23              | 0.57           |
| 51147       | Prince Edward, VA  | 0.034         | 70.17              | 72.96          |
| 51149       | Prince George, VA  | 0.017         | 62.59              | 31.75          |
| 51153       | Prince William, VA | -0.136        | 7.07               | 30.22          |
| 51155       | Pulaski, VA        | -0.074        | 23.11              | 48.31          |
| 51157       | Rappahannock, VA   | -0.15         | 5.06               | 2.13           |
| 51159       | Richmond, VA       | 0.056         | 76.79              | 61.43          |
| 51161       | Roanoke, VA        | -0.166        | 3.57               | 13.12          |
| 51163       | Rockbridge, VA     | -0.123        | 9.42               | 14.33          |
| 51165       | Rockingham, VA     | -0.019        | 46.77              | 31.97          |
| 51167       | Russell, VA        | 0.019         | 63.64              | 44.87          |
| 51169       | Scott, VA          | 0.069         | 80.36              | 67.58          |
| 51171       | Shenandoah, VA     | -0.097        | 15.47              | 36.43          |
| 51173       | Smyth, VA          | 0.009         | 59.76              | 75.48          |
| 51175       | Southampton, VA    | -0.059        | 30.15              | 47.55          |
| 51177       | Spotsylvania, VA   | -0.063        | 28.05              | 21.59          |
| 51179       | Stafford, VA       | -0.108        | 12.64              | 15.41          |

| <b>County FIPS</b> | <b>County Description</b>    | <b>DOS-SVI Index</b> | <b>DOS-SVI Percentile</b> | <b>SVI Percentile</b> |
|--------------------|------------------------------|----------------------|---------------------------|-----------------------|
| 51181              | Surry, VA                    | -0.078               | 21.94                     | 36.59                 |
| 51183              | Sussex, VA                   | 0.137                | 92.07                     | 90.92                 |
| 51185              | Tazewell, VA                 | 0.054                | 76.25                     | 59.36                 |
| 51187              | Warren, VA                   | -0.043               | 37.03                     | 25.64                 |
| 51191              | Washington, VA               | -0.041               | 37.6                      | 36.46                 |
| 51193              | Westmoreland, VA             | -0.102               | 14.29                     | 29.2                  |
| 51195              | Wise, VA                     | 0.095                | 85.86                     | 85.99                 |
| 51197              | Wythe, VA                    | -0.002               | 54.73                     | 39.65                 |
| 51199              | York, VA                     | -0.133               | 7.51                      | 19.97                 |
| 51510              | Alexandria City, VA          | -0.337               | 0.1                       | 20.03                 |
| 51520              | Bristol City, VA             | -0.131               | 8.02                      | 75.1                  |
| 51530              | Buena Vista City, VA         | -0.11                | 12.42                     | 32.42                 |
| 51540              | Charlottesville City,<br>VA  | -0.128               | 8.72                      | 40.92                 |
| 51550              | Chesapeake City, VA          | -0.113               | 11.81                     | 25.92                 |
| 51570              | Colonial Heights City,<br>VA | -0.122               | 9.52                      | 56.85                 |
| 51580              | Covington City, VA           | 0.016                | 62.37                     | 46.34                 |
| 51590              | Danville City, VA            | -0.071               | 24.39                     | 95.89                 |
| 51595              | Emporia City, VA             | 0.031                | 68.83                     | 95.67                 |
| 51600              | Fairfax City, VA             | -0.137               | 6.88                      | 24.11                 |
| 51610              | Falls Church City, VA        | -0.195               | 1.97                      | 13.89                 |
| 51620              | Franklin City, VA            | -0.184               | 2.36                      | 71.75                 |
| 51630              | Fredericksburg City,<br>VA   | -0.177               | 2.83                      | 56.31                 |
| 51640              | Galax City, VA               | -0.116               | 11.02                     | 98.38                 |
| 51650              | Hampton City, VA             | -0.12                | 10.06                     | 66.75                 |
| 51660              | Harrisonburg City, VA        | -0.092               | 16.55                     | 79.3                  |
| 51670              | Hopewell City, VA            | -0.068               | 25.79                     | 94.08                 |
| 51678              | Lexington City, VA           | 0.232                | 97.45                     | 32.26                 |
| 51680              | Lynchburg City, VA           | -0.022               | 45.81                     | 73.69                 |
| 51683              | Manassas City, VA            | -0.185               | 2.29                      | 44.46                 |
| 51685              | Manassas Park City,<br>VA    | -0.276               | 0.45                      | 52.8                  |
| 51690              | Martinsville City, VA        | -0.173               | 2.96                      | 91.05                 |
| 51700              | Newport News City,<br>VA     | -0.085               | 18.75                     | 81.56                 |
| 51710              | Norfolk City, VA             | -0.053               | 32.44                     | 77.17                 |
| 51720              | Norton City, VA              | 0.008                | 59.09                     | 90.54                 |
| 51730              | Petersburg City, VA          | -0.105               | 13.34                     | 96.43                 |
| 51735              | Poquoson City, VA            | -0.111               | 12.1                      | 1.27                  |
| 51740              | Portsmouth City, VA          | -0.065               | 27.03                     | 80.06                 |
| 51750              | Radford City, VA             | -0.009               | 51.26                     | 41.24                 |
| 51760              | Richmond City, VA            | -0.15                | 5.19                      | 77.29                 |
| 51770              | Roanoke City, VA             | -0.115               | 11.11                     | 80.38                 |
| 51775              | Salem City, VA               | -0.117               | 10.82                     | 30.89                 |
| 51790              | Staunton City, VA            | -0.156               | 4.39                      | 44.49                 |
| 51800              | Suffolk City, VA             | -0.094               | 15.89                     | 34.68                 |
| 51810              | Virginia Beach City,<br>VA   | -0.157               | 4.3                       | 18.89                 |
| 51820              | Waynesboro City, VA          | -0.13                | 8.28                      | 60.13                 |
| 51830              | Williamsburg City, VA        | 0.034                | 70.23                     | 38.5                  |
| 51840              | Winchester City, VA          | -0.159               | 4.2                       | 72.2                  |
| 53001              | Adams, WA                    | 0.193                | 96.12                     | 96.21                 |
| 53003              | Asotin, WA                   | -0.051               | 33.24                     | 42.48                 |



| <b>County FIPS</b> | <b>County Description</b> | <b>DOS-SVI Index</b> | <b>DOS-SVI Percentile</b> | <b>SVI Percentile</b> |
|--------------------|---------------------------|----------------------|---------------------------|-----------------------|
| 53005              | Benton, WA                | -0.04                | 38.08                     | 51.4                  |
| 53007              | Chelan, WA                | -0.107               | 12.99                     | 67.8                  |
| 53009              | Clallam, WA               | -0.083               | 19.9                      | 61.46                 |
| 53011              | Clark, WA                 | -0.031               | 42.25                     | 28.57                 |
| 53013              | Columbia, WA              | -0.091               | 17.03                     | 31.46                 |
| 53015              | Cowlitz, WA               | 0                    | 55.59                     | 78.85                 |
| 53017              | Douglas, WA               | 0.01                 | 60.14                     | 77.07                 |
| 53019              | Ferry, WA                 | 0.056                | 76.76                     | 82.23                 |
| 53021              | Franklin, WA              | 0.072                | 81.41                     | 86.91                 |
| 53023              | Garfield, WA              | 0.005                | 57.69                     | 18.34                 |
| 53025              | Grant, WA                 | 0.019                | 63.83                     | 84.52                 |
| 53027              | Grays Harbor, WA          | -0.013               | 49.63                     | 83.92                 |
| 53029              | Island, WA                | -0.095               | 15.82                     | 18.57                 |
| 53031              | Jefferson, WA             | -0.169               | 3.22                      | 24.14                 |
| 53033              | King, WA                  | -0.141               | 6.21                      | 28.54                 |
| 53035              | Kitsap, WA                | -0.071               | 24.61                     | 28.25                 |
| 53037              | Kittitas, WA              | -0.039               | 38.87                     | 28.31                 |
| 53039              | Klickitat, WA             | 0.061                | 78                        | 57.23                 |
| 53041              | Lewis, WA                 | 0.025                | 66.25                     | 78.89                 |
| 53043              | Lincoln, WA               | -0.048               | 34.29                     | 19.84                 |
| 53045              | Mason, WA                 | -0.02                | 46.58                     | 63.82                 |
| 53047              | Okanogan, WA              | -0.05                | 33.37                     | 92.55                 |
| 53049              | Pacific, WA               | -0.155               | 4.55                      | 73.6                  |
| 53051              | Pend Oreille, WA          | 0.05                 | 74.98                     | 53.6                  |
| 53053              | Pierce, WA                | -0.058               | 30.37                     | 48.73                 |
| 53055              | San Juan, WA              | -0.145               | 5.83                      | 8.63                  |
| 53057              | Skagit, WA                | 0.006                | 58.01                     | 53.82                 |
| 53059              | Skamania, WA              | 0.031                | 68.99                     | 21.94                 |
| 53061              | Snohomish, WA             | -0.085               | 18.82                     | 27.55                 |
| 53063              | Spokane, WA               | -0.067               | 26.23                     | 48.25                 |
| 53065              | Stevens, WA               | 0.036                | 70.97                     | 46.15                 |
| 53067              | Thurston, WA              | -0.068               | 25.6                      | 32.99                 |
| 53069              | Wahkiakum, WA             | -0.129               | 8.4                       | 18.09                 |
| 53071              | Walla Walla, WA           | -0.01                | 50.68                     | 68.31                 |
| 53073              | Whatcom, WA               | -0.031               | 41.99                     | 45.41                 |
| 53075              | Whitman, WA               | 0.053                | 75.96                     | 51.08                 |
| 53077              | Yakima, WA                | 0.022                | 65.08                     | 92.77                 |
| 54001              | Barbour, WV               | 0.065                | 79.34                     | 65.13                 |
| 54003              | Berkeley, WV              | 0.017                | 62.72                     | 44.33                 |
| 54005              | Boone, WV                 | 0.143                | 92.93                     | 70.41                 |
| 54007              | Braxton, WV               | 0.171                | 94.52                     | 66.46                 |
| 54009              | Brooke, WV                | -0.019               | 46.8                      | 33.06                 |
| 54011              | Cabell, WV                | -0.035               | 40.59                     | 62.45                 |
| 54013              | Calhoun, WV               | 0.093                | 85.26                     | 52.39                 |
| 54015              | Clay, WV                  | 0.142                | 92.81                     | 68.85                 |
| 54017              | Doddridge, WV             | 0.072                | 81.44                     | 36.08                 |
| 54019              | Fayette, WV               | 0.034                | 70.39                     | 76.4                  |
| 54021              | Gilmer, WV                | 0.147                | 93.35                     | 75.64                 |
| 54023              | Grant, WV                 | -0.013               | 49.51                     | 36.75                 |
| 54025              | Greenbrier, WV            | 0.006                | 57.85                     | 55.57                 |
| 54027              | Hampshire, WV             | 0.022                | 64.88                     | 64.33                 |
| 54029              | Hancock, WV               | -0.029               | 42.85                     | 40.51                 |
| 54031              | Hardy, WV                 | -0.143               | 5.99                      | 28.5                  |
| 54033              | Harrison, WV              | 0.035                | 70.68                     | 40.89                 |
| 54035              | Jackson, WV               | 0.071                | 81.09                     | 25.29                 |

| <b>County FIPS</b> | <b>County Description</b> | <b>DOS-SVI Index</b> | <b>DOS-SVI Percentile</b> | <b>SVI Percentile</b> |
|--------------------|---------------------------|----------------------|---------------------------|-----------------------|
| 54037              | Jefferson, WV             | 0.004                | 57.34                     | 22.55                 |
| 54039              | Kanawha, WV               | -0.049               | 33.88                     | 56.56                 |
| 54041              | Lewis, WV                 | 0.049                | 74.66                     | 67.61                 |
| 54043              | Lincoln, WV               | 0.178                | 95.03                     | 60.57                 |
| 54045              | Logan, WV                 | 0.12                 | 90.42                     | 74.71                 |
| 54047              | McDowell, WV              | 0.192                | 95.99                     | 90.29                 |
| 54049              | Marion, WV                | 0.006                | 58.13                     | 49.39                 |
| 54051              | Marshall, WV              | 0.004                | 57.05                     | 21.53                 |
| 54053              | Mason, WV                 | 0.111                | 89.27                     | 54.97                 |
| 54055              | Mercer, WV                | -0.036               | 40.21                     | 80.89                 |
| 54057              | Mineral, WV               | -0.048               | 34.45                     | 59.33                 |
| 54059              | Mingo, WV                 | 0.201                | 96.37                     | 78.5                  |
| 54061              | Monongalia, WV            | 0.062                | 78.7                      | 41.11                 |
| 54063              | Monroe, WV                | -0.009               | 50.97                     | 46.62                 |
| 54065              | Morgan, WV                | 0.081                | 83.22                     | 17.64                 |
| 54067              | Nicholas, WV              | 0.073                | 81.57                     | 54.11                 |
| 54069              | Ohio, WV                  | -0.021               | 46.26                     | 31.08                 |
| 54071              | Pendleton, WV             | -0.053               | 32.25                     | 35.8                  |
| 54073              | Pleasants, WV             | 0.049                | 74.63                     | 44.68                 |
| 54075              | Pocahontas, WV            | -0.104               | 13.79                     | 49.71                 |
| 54077              | Preston, WV               | 0.117                | 89.94                     | 57.32                 |
| 54079              | Putnam, WV                | -0.024               | 44.86                     | 4.08                  |
| 54081              | Raleigh, WV               | 0.016                | 62.27                     | 76.85                 |
| 54083              | Randolph, WV              | 0.05                 | 75.04                     | 58.06                 |
| 54085              | Ritchie, WV               | -0.013               | 49.67                     | 36.4                  |
| 54087              | Roane, WV                 | 0.089                | 84.46                     | 64.65                 |
| 54089              | Summers, WV               | 0.052                | 75.74                     | 82.9                  |
| 54091              | Taylor, WV                | 0.007                | 58.64                     | 49.49                 |
| 54093              | Tucker, WV                | -0.056               | 31.01                     | 36.72                 |
| 54095              | Tyler, WV                 | -0.008               | 51.54                     | 22.13                 |
| 54097              | Upshur, WV                | 0.054                | 76.19                     | 69.11                 |
| 54099              | Wayne, WV                 | 0.057                | 77.11                     | 60.06                 |
| 54101              | Webster, WV               | 0.033                | 69.85                     | 74.87                 |
| 54103              | Wetzel, WV                | -0.022               | 45.88                     | 47.52                 |
| 54105              | Wirt, WV                  | 0.009                | 59.31                     | 37.48                 |
| 54107              | Wood, WV                  | -0.029               | 43.01                     | 37.23                 |
| 54109              | Wyoming, WV               | 0.158                | 93.89                     | 64.43                 |
| 55001              | Adams, WI                 | -0.028               | 43.39                     | 56.85                 |
| 55003              | Ashland, WI               | 0.033                | 70.11                     | 55                    |
| 55005              | Barron, WI                | -0.035               | 40.81                     | 32.71                 |
| 55007              | Bayfield, WI              | -0.096               | 15.73                     | 9.9                   |
| 55009              | Brown, WI                 | -0.085               | 18.62                     | 32.99                 |
| 55011              | Buffalo, WI               | -0.099               | 15.09                     | 5.76                  |
| 55013              | Burnett, WI               | -0.135               | 7.16                      | 16.72                 |
| 55015              | Calumet, WI               | -0.052               | 32.51                     | 1.82                  |
| 55017              | Chippewa, WI              | -0.022               | 45.62                     | 21.05                 |
| 55019              | Clark, WI                 | 0.154                | 93.66                     | 53.5                  |
| 55021              | Columbia, WI              | -0.065               | 27.41                     | 12.04                 |
| 55023              | Crawford, WI              | -0.006               | 52.53                     | 39.71                 |
| 55025              | Dane, WI                  | -0.143               | 5.89                      | 16.88                 |
| 55027              | Dodge, WI                 | -0.05                | 33.49                     | 20.19                 |
| 55029              | Door, WI                  | -0.182               | 2.61                      | 5.57                  |
| 55031              | Douglas, WI               | -0.043               | 36.93                     | 27.48                 |
| 55033              | Dunn, WI                  | 0.041                | 72.56                     | 18.47                 |
| 55035              | Eau Claire, WI            | -0.035               | 40.62                     | 21.75                 |

| <b>County FIPS</b> | <b>County Description</b> | <b>DOS-SVI Index</b> | <b>DOS-SVI Percentile</b> | <b>SVI Percentile</b> |
|--------------------|---------------------------|----------------------|---------------------------|-----------------------|
| 55037              | Florence, WI              | 0.001                | 56.03                     | 14.52                 |
| 55039              | Fond du Lac, WI           | -0.054               | 32.06                     | 20.38                 |
| 55041              | Forest, WI                | -0.051               | 33.08                     | 57.74                 |
| 55043              | Grant, WI                 | 0.032                | 69.34                     | 19.39                 |
| 55045              | Green, WI                 | -0.094               | 16.08                     | 5.29                  |
| 55047              | Green Lake, WI            | -0.028               | 43.2                      | 28.69                 |
| 55049              | Iowa, WI                  | -0.045               | 35.85                     | 1.31                  |
| 55051              | Iron, WI                  | -0.109               | 12.58                     | 36.02                 |
| 55053              | Jackson, WI               | 0.053                | 76.09                     | 50.03                 |
| 55055              | Jefferson, WI             | -0.043               | 36.9                      | 18.54                 |
| 55057              | Juneau, WI                | 0.03                 | 68.32                     | 37.8                  |
| 55059              | Kenosha, WI               | -0.069               | 25.47                     | 51.11                 |
| 55061              | Kewaunee, WI              | -0.038               | 39.03                     | 5.86                  |
| 55063              | La Crosse, WI             | -0.065               | 27                        | 20.89                 |
| 55065              | Lafayette, WI             | -0.024               | 44.92                     | 15.96                 |
| 55067              | Langlade, WI              | -0.072               | 24.16                     | 35.35                 |
| 55069              | Lincoln, WI               | -0.072               | 24.29                     | 10.13                 |
| 55071              | Manitowoc, WI             | -0.089               | 17.38                     | 16.21                 |
| 55073              | Marathon, WI              | -0.031               | 42.12                     | 14.43                 |
| 55075              | Marinette, WI             | -0.057               | 30.72                     | 29.71                 |
| 55077              | Marquette, WI             | -0.033               | 41.52                     | 25.96                 |
| 55078              | Menominee, WI             | 0.145                | 93.12                     | 76.72                 |
| 55079              | Milwaukee, WI             | -0.124               | 9.27                      | 80.61                 |
| 55081              | Monroe, WI                | 0.002                | 56.22                     | 46.21                 |
| 55083              | Oconto, WI                | -0.036               | 39.86                     | 6.4                   |
| 55085              | Oneida, WI                | -0.125               | 9.04                      | 1.4                   |
| 55087              | Outagamie, WI             | -0.06                | 29.48                     | 9.78                  |
| 55089              | Ozaukee, WI               | -0.128               | 8.66                      | 1.34                  |
| 55091              | Pepin, WI                 | -0.084               | 19.36                     | 10.19                 |
| 55093              | Pierce, WI                | -0.029               | 42.79                     | 8.06                  |
| 55095              | Polk, WI                  | -0.068               | 25.57                     | 8.73                  |
| 55097              | Portage, WI               | -0.035               | 40.75                     | 16.53                 |
| 55099              | Price, WI                 | -0.076               | 22.19                     | 16.02                 |
| 55101              | Racine, WI                | -0.13                | 8.25                      | 45.51                 |
| 55103              | Richland, WI              | -0.048               | 34.32                     | 30.73                 |
| 55105              | Rock, WI                  | -0.079               | 21.23                     | 45.61                 |
| 55107              | Rusk, WI                  | -0.044               | 36.55                     | 34.65                 |
| 55109              | St. Croix, WI             | -0.048               | 34.07                     | 1.46                  |
| 55111              | Sauk, WI                  | -0.064               | 27.73                     | 23.44                 |
| 55113              | Sawyer, WI                | -0.081               | 20.25                     | 42.68                 |
| 55115              | Shawano, WI               | -0.061               | 28.88                     | 13.82                 |
| 55117              | Sheboygan, WI             | -0.051               | 33.21                     | 22.45                 |
| 55119              | Taylor, WI                | 0.005                | 57.53                     | 20                    |
| 55121              | Trempealeau, WI           | -0.022               | 45.43                     | 28.12                 |
| 55123              | Vernon, WI                | 0.11                 | 88.86                     | 38.34                 |
| 55125              | Vilas, WI                 | -0.159               | 4.14                      | 13.95                 |
| 55127              | Walworth, WI              | -0.08                | 20.79                     | 26.88                 |
| 55129              | Washburn, WI              | -0.084               | 19.2                      | 10.8                  |
| 55131              | Washington, WI            | -0.121               | 9.87                      | 0.99                  |
| 55133              | Waukesha, WI              | -0.126               | 9.01                      | 1.94                  |
| 55135              | Waupaca, WI               | -0.095               | 15.79                     | 18.15                 |
| 55137              | Waushara, WI              | -0.047               | 34.83                     | 36.53                 |
| 55139              | Winnebago, WI             | -0.1                 | 14.52                     | 16.08                 |
| 55141              | Wood, WI                  | -0.103               | 13.91                     | 15.35                 |
| 56001              | Albany, WY                | 0.037                | 71.57                     | 24.94                 |

| <b>County FIPS</b> | <b>County Description</b> | <b>DOS-SVI Index</b> | <b>DOS-SVI Percentile</b> | <b>SVI Percentile</b> |
|--------------------|---------------------------|----------------------|---------------------------|-----------------------|
| 56003              | Big Horn, WY              | 0.066                | 79.53                     | 39.55                 |
| 56005              | Campbell, WY              | 0.1                  | 86.85                     | 33.15                 |
| 56007              | Carbon, WY                | 0.004                | 57.12                     | 50.29                 |
| 56009              | Converse, WY              | 0.064                | 79.15                     | 20.48                 |
| 56011              | Crook, WY                 | 0.107                | 88.16                     | 3.28                  |
| 56013              | Fremont, WY               | 0.098                | 86.41                     | 56.24                 |
| 56015              | Goshen, WY                | -0.069               | 25.25                     | 32.64                 |
| 56017              | Hot Springs, WY           | -0.059               | 29.67                     | 12.29                 |
| 56019              | Johnson, WY               | -0.045               | 35.88                     | 17.74                 |
| 56021              | Laramie, WY               | -0.039               | 38.55                     | 26.97                 |
| 56023              | Lincoln, WY               | 0.08                 | 83.06                     | 8.09                  |
| 56025              | Natrona, WY               | -0.052               | 32.98                     | 29.52                 |
| 56027              | Niobrara, WY              | 0.054                | 76.22                     | 33.6                  |
| 56029              | Park, WY                  | -0.055               | 31.8                      | 6.59                  |
| 56031              | Platte, WY                | -0.132               | 7.93                      | 9.52                  |
| 56033              | Sheridan, WY              | -0.05                | 33.56                     | 8.95                  |
| 56035              | Sublette, WY              | -0.046               | 35.56                     | 2.93                  |
| 56037              | Sweetwater, WY            | 0.009                | 59.38                     | 37.01                 |
| 56039              | Teton, WY                 | 0.052                | 75.64                     | 11.27                 |
| 56041              | Uinta, WY                 | 0.173                | 94.72                     | 45.22                 |
| 56043              | Washakie, WY              | 0.023                | 65.58                     | 37.32                 |
| 56045              | Weston, WY                | 0.03                 | 68.42                     | 34.75                 |

Appendix Table 9: THA/TKA DOS-SVI and CDC SVI Percentiles by County

| County FIPS | County Description | DOS-SVI Index | DOS-SVI Percentile | SVI Percentile |
|-------------|--------------------|---------------|--------------------|----------------|
| 01001       | Autauga, AL        | -0.002        | 51.45              | 43.54          |
| 01003       | Baldwin, AL        | -0.039        | 47.72              | 21.62          |
| 01005       | Barbour, AL        | 0.984         | 96.97              | 99.59          |
| 01007       | Bibb, AL           | 0.335         | 80.42              | 60.03          |
| 01009       | Blount, AL         | -0.144        | 37.5               | 42.42          |
| 01011       | Bullock, AL        | 1.761         | 99.84              | 88.98          |
| 01013       | Butler, AL         | 0.449         | 85.55              | 86.53          |
| 01015       | Calhoun, AL        | 0.461         | 86.22              | 82.52          |
| 01017       | Chambers, AL       | 0.181         | 69.69              | 73.82          |
| 01019       | Cherokee, AL       | -0.17         | 34.77              | 45.16          |
| 01021       | Chilton, AL        | 0.036         | 55.59              | 76.02          |
| 01023       | Choctaw, AL        | 0.434         | 85.04              | 87.48          |
| 01025       | Clarke, AL         | 0.328         | 79.88              | 84.71          |
| 01027       | Clay, AL           | 0.395         | 83.48              | 56.4           |
| 01029       | Cleburne, AL       | 0.068         | 58.8               | 54.17          |
| 01031       | Coffee, AL         | 0.129         | 64.22              | 54.08          |
| 01033       | Colbert, AL        | 0.297         | 78.03              | 42.74          |
| 01035       | Conecuh, AL        | 0.68          | 93.47              | 80.86          |
| 01037       | Coosa, AL          | 0.149         | 66.7               | 52.61          |
| 01039       | Covington, AL      | 0.167         | 68.61              | 77.23          |
| 01041       | Crenshaw, AL       | 0.245         | 74.08              | 68.73          |
| 01043       | Cullman, AL        | -0.046        | 46.93              | 51.82          |
| 01045       | Dale, AL           | 0.227         | 72.88              | 75.99          |
| 01047       | Dallas, AL         | 0.767         | 94.81              | 94.9           |
| 01049       | DeKalb, AL         | 0.089         | 61.03              | 80.22          |
| 01051       | Elmore, AL         | 0.258         | 75.07              | 54.01          |
| 01053       | Escambia, AL       | 0.64          | 92.3               | 85.57          |
| 01055       | Etowah, AL         | 0.3           | 78.22              | 65.64          |
| 01057       | Fayette, AL        | 0.312         | 79.02              | 70.38          |
| 01059       | Franklin, AL       | -0.015        | 50.62              | 84.17          |
| 01061       | Geneva, AL         | 0.369         | 82.23              | 79.55          |
| 01063       | Greene, AL         | 0.918         | 96.69              | 98.54          |
| 01065       | Hale, AL           | 0.346         | 81.03              | 95.99          |
| 01067       | Henry, AL          | 0.083         | 60.36              | 55.19          |
| 01069       | Houston, AL        | 0.401         | 83.73              | 68.38          |
| 01071       | Jackson, AL        | 0.099         | 61.73              | 57.26          |
| 01073       | Jefferson, AL      | 0.503         | 88                 | 66.21          |
| 01075       | Lamar, AL          | 0.037         | 55.72              | 62.64          |
| 01077       | Lauderdale, AL     | 0.112         | 62.88              | 44.68          |
| 01079       | Lawrence, AL       | 0.123         | 63.8               | 49.52          |
| 01081       | Lee, AL            | 0.434         | 85.07              | 66.02          |
| 01083       | Limestone, AL      | 0.056         | 57.72              | 52.96          |
| 01085       | Lowndes, AL        | 1.011         | 97.26              | 91.88          |
| 01087       | Macon, AL          | 1.122         | 98.12              | 89.71          |
| 01089       | Madison, AL        | 0.143         | 65.97              | 30.76          |
| 01091       | Marengo, AL        | 0.357         | 81.69              | 76.21          |
| 01093       | Marion, AL         | 0.152         | 67.24              | 67.1           |
| 01095       | Marshall, AL       | 0.035         | 55.4               | 72.61          |
| 01097       | Mobile, AL         | 0.461         | 86.18              | 75.32          |
| 01099       | Monroe, AL         | 0.615         | 91.5               | 74.81          |
| 01101       | Montgomery, AL     | 0.737         | 94.33              | 84.27          |
| 01103       | Morgan, AL         | 0.071         | 59.15              | 68.95          |
| 01105       | Perry, AL          | 1.404         | 99.2               | 99.49          |
| 01107       | Pickens, AL        | 0.665         | 93.09              | 92.07          |

| County FIPS | County Description               | DOS-SVI Index | DOS-SVI Percentile | SVI Percentile |
|-------------|----------------------------------|---------------|--------------------|----------------|
| 01109       | Pike, AL                         | 0.796         | 95.19              | 90.16          |
| 01111       | Randolph, AL                     | -0.075        | 44.16              | 71.91          |
| 01113       | Russell, AL                      | 0.334         | 80.2               | 91.15          |
| 01115       | St. Clair, AL                    | 0.06          | 58.07              | 36.56          |
| 01117       | Shelby, AL                       | -0.305        | 23.18              | 11.69          |
| 01119       | Sumter, AL                       | 1.117         | 98.06              | 95.57          |
| 01121       | Talladega, AL                    | 0.577         | 90.58              | 87.36          |
| 01123       | Tallapoosa, AL                   | 0.204         | 71.09              | 88.63          |
| 01125       | Tuscaloosa, AL                   | 0.727         | 94.21              | 62.55          |
| 01127       | Walker, AL                       | 0.113         | 62.97              | 74.52          |
| 01129       | Washington, AL                   | 0.067         | 58.68              | 73.03          |
| 01131       | Wilcox, AL                       | 0.546         | 89.49              | 92.8           |
| 01133       | Winston, AL                      | 0.185         | 69.98              | 70.25          |
| 02013       | Aleutians East, AK               | 1.168         | 98.47              | 58.03          |
| 02016       | Aleutians West, AK               | -0.388        | 16.14              | 49.27          |
| 02020       | Anchorage, AK                    | -0.368        | 17.96              | 46.02          |
| 02050       | Bethel, AK                       | -4.235        | 0.06               | 97.48          |
| 02060       | Bristol Bay, AK                  | -0.377        | 17.03              | 35.25          |
| 02068       | Denali, AK                       | 0.767         | 94.84              | 10.1           |
| 02070       | Dillingham, AK                   | -2.396        | 0.26               | 86.82          |
| 02090       | Fairbanks North Star,<br>AK      | -0.569        | 7.7                | 34.46          |
| 02100       | Haines, AK                       | -1.603        | 0.32               | 20.7           |
| 02105       | Hoonah-Angoon, AK                | -0.407        | 14.77              | 41.78          |
| 02110       | Juneau City and<br>Borough, AK   | -0.707        | 3.98               | 29.87          |
| 02122       | Kenai Peninsula, AK              | -0.526        | 9.17               | 40.73          |
| 02130       | Ketchikan Gateway,<br>AK         | -0.229        | 29.32              | 55.48          |
| 02150       | Kodiak Island, AK                | -0.809        | 2.93               | 70.06          |
| 02158       | Kusilvak, AK                     | -5.533        | 0.03               | 93.34          |
| 02164       | Lake and Peninsula, AK           | -0.452        | 12.45              | 79.78          |
| 02170       | Matanuska-Susitna, AK            | -0.636        | 5.79               | 31.72          |
| 02180       | Nome, AK                         | -3.348        | 0.16               | 92.99          |
| 02185       | North Slope, AK                  | -3.301        | 0.19               | 73.44          |
| 02188       | Northwest Arctic, AK             | -4.073        | 0.1                | 93.54          |
| 02195       | Petersburg, AK                   | -0.489        | 10.73              | 66.5           |
| 02198       | Prince of Wales-Hyder,<br>AK     | -0.383        | 16.52              | 76.62          |
| 02220       | Sitka City and Borough,<br>AK    | -0.338        | 20.15              | 40.22          |
| 02230       | Skagway, AK                      | -0.273        | 25.53              | 16.85          |
| 02240       | Southeast Fairbanks,<br>AK       | -1.337        | 0.54               | 58.38          |
| 02261       | Valdez-Cordova, AK               | -0.475        | 11.43              | 27.04          |
| 02275       | Wrangell City and<br>Borough, AK | -0.356        | 18.75              | 56.18          |
| 02282       | Yakutat City and<br>Borough, AK  | -0.625        | 6.05               | 58.73          |
| 02290       | Yukon-Koyukuk, AK                | -1.581        | 0.35               | 88.12          |
| 04001       | Apache, AZ                       | -0.801        | 3.06               | 98.85          |
| 04003       | Cochise, AZ                      | 0.199         | 70.84              | 90.64          |
| 04005       | Coconino, AZ                     | -0.224        | 29.7               | 71.31          |
| 04007       | Gila, AZ                         | -0.125        | 39.19              | 89.9           |
| 04009       | Graham, AZ                       | 0.042         | 56.03              | 96.4           |

| County FIPS | County Description | DOS-SVI Index | DOS-SVI Percentile | SVI Percentile |
|-------------|--------------------|---------------|--------------------|----------------|
| 04011       | Greenlee, AZ       | -0.252        | 27.28              | 61.88          |
| 04012       | La Paz, AZ         | -0.545        | 8.66               | 92.36          |
| 04013       | Maricopa, AZ       | -0.228        | 29.48              | 63.54          |
| 04015       | Mohave, AZ         | -0.219        | 30.31              | 86.24          |
| 04017       | Navajo, AZ         | -0.416        | 14.29              | 99.55          |
| 04019       | Pima, AZ           | 0.055         | 57.59              | 88.28          |
| 04021       | Pinal, AZ          | -0.16         | 35.78              | 85.92          |
| 04023       | Santa Cruz, AZ     | 0.084         | 60.46              | 93.18          |
| 04025       | Yavapai, AZ        | -0.374        | 17.29              | 52.1           |
| 04027       | Yuma, AZ           | -0.542        | 8.79               | 98.95          |
| 05001       | Arkansas, AR       | 0.43          | 84.85              | 77.87          |
| 05003       | Ashley, AR         | 0.229         | 72.97              | 85.76          |
| 05005       | Baxter, AR         | -0.329        | 21.04              | 27.93          |
| 05007       | Benton, AR         | -0.524        | 9.23               | 27.07          |
| 05009       | Boone, AR          | -0.119        | 39.7               | 43.79          |
| 05011       | Bradley, AR        | 0.216         | 72.17              | 98.03          |
| 05013       | Calhoun, AR        | 0.176         | 69.25              | 54.81          |
| 05015       | Carroll, AR        | -0.879        | 2.32               | 59.52          |
| 05017       | Chicot, AR         | 1.033         | 97.42              | 99.68          |
| 05019       | Clark, AR          | 0.765         | 94.78              | 78.92          |
| 05021       | Clay, AR           | 0.552         | 89.78              | 65.29          |
| 05023       | Cleburne, AR       | -0.102        | 41.45              | 20.83          |
| 05025       | Cleveland, AR      | 0.206         | 71.22              | 56.43          |
| 05027       | Columbia, AR       | 0.485         | 87.23              | 93.98          |
| 05029       | Conway, AR         | 0.089         | 60.9               | 75.89          |
| 05031       | Craighead, AR      | 0.491         | 87.49              | 80.41          |
| 05033       | Crawford, AR       | -0.053        | 46.26              | 61.05          |
| 05035       | Crittenden, AR     | 0.582         | 90.7               | 93.41          |
| 05037       | Cross, AR          | 0.217         | 72.24              | 70.13          |
| 05039       | Dallas, AR         | 0.615         | 91.53              | 87.77          |
| 05041       | Desha, AR          | 0.623         | 91.72              | 95.96          |
| 05043       | Drew, AR           | 0.476         | 86.98              | 80.1           |
| 05045       | Faulkner, AR       | 0.211         | 71.73              | 47.74          |
| 05047       | Franklin, AR       | -0.149        | 36.96              | 59.43          |
| 05049       | Fulton, AR         | -0.102        | 41.52              | 66.88          |
| 05051       | Garland, AR        | 0.28          | 76.76              | 82.8           |
| 05053       | Grant, AR          | 0.001         | 51.86              | 35.41          |
| 05055       | Greene, AR         | 0.158         | 67.84              | 58.34          |
| 05057       | Hempstead, AR      | 0.458         | 85.93              | 94.68          |
| 05059       | Hot Spring, AR     | 0.231         | 73.1               | 81.88          |
| 05061       | Howard, AR         | 0.213         | 72.02              | 90.45          |
| 05063       | Independence, AR   | 0.138         | 65.17              | 75.25          |
| 05065       | Izard, AR          | 0.054         | 57.53              | 56.97          |
| 05067       | Jackson, AR        | 0.87          | 96.24              | 76.5           |
| 05069       | Jefferson, AR      | 0.843         | 95.86              | 94.36          |
| 05071       | Johnson, AR        | 0.126         | 64.02              | 87.68          |
| 05073       | Lafayette, AR      | 0.269         | 75.87              | 78.98          |
| 05075       | Lawrence, AR       | 0.305         | 78.54              | 64.71          |
| 05077       | Lee, AR            | 1.22          | 98.69              | 96.56          |
| 05079       | Lincoln, AR        | 1.131         | 98.25              | 81.34          |
| 05081       | Little River, AR   | 0.149         | 66.73              | 63.06          |
| 05083       | Logan, AR          | 0.32          | 79.4               | 80.45          |
| 05085       | Lonoke, AR         | -0.053        | 46.2               | 33.09          |
| 05087       | Madison, AR        | -0.3          | 23.53              | 65.35          |
| 05089       | Marion, AR         | 0.04          | 55.91              | 51.75          |

| <b>County FIPS</b> | <b>County Description</b> | <b>DOS-SVI Index</b> | <b>DOS-SVI Percentile</b> | <b>SVI Percentile</b> |
|--------------------|---------------------------|----------------------|---------------------------|-----------------------|
| 05091              | Miller, AR                | 0.467                | 86.56                     | 91.24                 |
| 05093              | Mississippi, AR           | 0.51                 | 88.19                     | 95.54                 |
| 05095              | Monroe, AR                | 0.773                | 94.97                     | 85.16                 |
| 05097              | Montgomery, AR            | -0.099               | 41.77                     | 70                    |
| 05099              | Nevada, AR                | 0.223                | 72.62                     | 88.41                 |
| 05101              | Newton, AR                | -0.199               | 31.96                     | 28.15                 |
| 05103              | Ouachita, AR              | 0.409                | 84.05                     | 86.56                 |
| 05105              | Perry, AR                 | -0.314               | 22.54                     | 63.6                  |
| 05107              | Phillips, AR              | 1.246                | 98.82                     | 92.39                 |
| 05109              | Pike, AR                  | 0.044                | 56.35                     | 71.24                 |
| 05111              | Poinsett, AR              | 0.162                | 68.16                     | 82.68                 |
| 05113              | Polk, AR                  | -0.165               | 35.27                     | 89.49                 |
| 05115              | Pope, AR                  | 0.358                | 81.82                     | 79.36                 |
| 05117              | Prairie, AR               | -0.201               | 31.58                     | 65.48                 |
| 05119              | Pulaski, AR               | 0.479                | 87.07                     | 62.87                 |
| 05121              | Randolph, AR              | 0.221                | 72.56                     | 71.66                 |
| 05123              | St. Francis, AR           | 1.034                | 97.45                     | 96.91                 |
| 05125              | Saline, AR                | -0.197               | 32.28                     | 33.25                 |
| 05127              | Scott, AR                 | -0.093               | 42.25                     | 88.73                 |
| 05129              | Searcy, AR                | 0.014                | 53.14                     | 43.76                 |
| 05131              | Sebastian, AR             | 0.197                | 70.74                     | 83.28                 |
| 05133              | Sevier, AR                | -0.874               | 2.42                      | 76.75                 |
| 05135              | Sharp, AR                 | 0.081                | 60.14                     | 61.91                 |
| 05137              | Stone, AR                 | 0.119                | 63.42                     | 51.02                 |
| 05139              | Union, AR                 | -0.135               | 38.4                      | 80.54                 |
| 05141              | Van Buren, AR             | 0.079                | 59.82                     | 72.26                 |
| 05143              | Washington, AR            | 0.114                | 63.1                      | 67.45                 |
| 05145              | White, AR                 | 0.257                | 75.04                     | 74.46                 |
| 05147              | Woodruff, AR              | 0.643                | 92.45                     | 84.9                  |
| 05149              | Yell, AR                  | -0.242               | 28.27                     | 87.83                 |
| 06001              | Alameda, CA               | -0.864               | 2.48                      | 47.01                 |
| 06003              | Alpine, CA                | 0.27                 | 75.9                      | 72.87                 |
| 06005              | Amador, CA                | -0.161               | 35.53                     | 53.34                 |
| 06007              | Butte, CA                 | 0.044                | 56.32                     | 80.64                 |
| 06009              | Calaveras, CA             | -0.241               | 28.46                     | 23.5                  |
| 06011              | Colusa, CA                | -0.578               | 7.54                      | 74.36                 |
| 06013              | Contra Costa, CA          | -0.643               | 5.48                      | 40.57                 |
| 06015              | Del Norte, CA             | 0.24                 | 73.61                     | 97.13                 |
| 06017              | El Dorado, CA             | -0.548               | 8.56                      | 18.38                 |
| 06019              | Fresno, CA                | -0.369               | 17.8                      | 96.11                 |
| 06021              | Glenn, CA                 | -0.131               | 38.62                     | 88.95                 |
| 06023              | Humboldt, CA              | 0.075                | 59.44                     | 76.05                 |
| 06025              | Imperial, CA              | -0.568               | 7.77                      | 99.78                 |
| 06027              | Inyo, CA                  | -0.343               | 19.83                     | 57.01                 |
| 06029              | Kern, CA                  | -0.452               | 12.51                     | 96.59                 |
| 06031              | Kings, CA                 | 0.122                | 63.74                     | 97.07                 |
| 06033              | Lake, CA                  | 0.02                 | 53.8                      | 91.78                 |
| 06035              | Lassen, CA                | 1.188                | 98.57                     | 59.97                 |
| 06037              | Los Angeles, CA           | -0.918               | 2.01                      | 76.82                 |
| 06039              | Madera, CA                | -0.568               | 7.8                       | 95.41                 |
| 06041              | Marin, CA                 | -0.906               | 2.17                      | 27.01                 |
| 06043              | Mariposa, CA              | -0.169               | 34.92                     | 52.93                 |
| 06045              | Mendocino, CA             | -0.285               | 24.64                     | 88.18                 |
| 06047              | Merced, CA                | -0.442               | 12.89                     | 97.17                 |
| 06049              | Modoc, CA                 | -0.246               | 27.92                     | 75.16                 |



| <b>County FIPS</b> | <b>County Description</b> | <b>DOS-SVI Index</b> | <b>DOS-SVI Percentile</b> | <b>SVI Percentile</b> |
|--------------------|---------------------------|----------------------|---------------------------|-----------------------|
| 06051              | Mono, CA                  | -0.111               | 40.56                     | 14.08                 |
| 06053              | Monterey, CA              | -1.557               | 0.38                      | 79.9                  |
| 06055              | Napa, CA                  | -0.977               | 1.69                      | 50.51                 |
| 06057              | Nevada, CA                | -0.399               | 15.38                     | 20.45                 |
| 06059              | Orange, CA                | -1.052               | 1.43                      | 41.91                 |
| 06061              | Placer, CA                | -0.539               | 8.95                      | 15.19                 |
| 06063              | Plumas, CA                | -0.231               | 29.26                     | 26.53                 |
| 06065              | Riverside, CA             | -0.592               | 7                         | 79.39                 |
| 06067              | Sacramento, CA            | -0.166               | 35.15                     | 73.38                 |
| 06069              | San Benito, CA            | -0.947               | 1.88                      | 52.45                 |
| 06071              | San Bernardino, CA        | -0.469               | 11.59                     | 90.1                  |
| 06073              | San Diego, CA             | -0.48                | 11.14                     | 55.96                 |
| 06075              | San Francisco, CA         | -0.949               | 1.82                      | 39.11                 |
| 06077              | San Joaquin, CA           | -0.417               | 14.17                     | 88.92                 |
| 06079              | San Luis Obispo, CA       | -0.268               | 25.98                     | 37.39                 |
| 06081              | San Mateo, CA             | -1.219               | 0.67                      | 26.5                  |
| 06083              | Santa Barbara, CA         | -1.072               | 1.3                       | 71.11                 |
| 06085              | Santa Clara, CA           | -1.132               | 1.02                      | 35.57                 |
| 06087              | Santa Cruz, CA            | -0.807               | 2.99                      | 54.3                  |
| 06089              | Shasta, CA                | -0.145               | 37.41                     | 70.22                 |
| 06091              | Sierra, CA                | -0.327               | 21.27                     | 4.52                  |
| 06093              | Siskiyou, CA              | -0.204               | 31.36                     | 72.23                 |
| 06095              | Solano, CA                | -0.326               | 21.43                     | 59.11                 |
| 06097              | Sonoma, CA                | -0.705               | 4.04                      | 40.35                 |
| 06099              | Stanislaus, CA            | -0.402               | 15.12                     | 86.75                 |
| 06101              | Sutter, CA                | -0.406               | 14.84                     | 88.22                 |
| 06103              | Tehama, CA                | -0.184               | 33.56                     | 96.24                 |
| 06105              | Trinity, CA               | 0.09                 | 61.09                     | 74.11                 |
| 06107              | Tulare, CA                | -0.506               | 10.03                     | 94.17                 |
| 06109              | Tuolumne, CA              | -0.318               | 22.09                     | 46.88                 |
| 06111              | Ventura, CA               | -0.876               | 2.39                      | 48.28                 |
| 06113              | Yolo, CA                  | -0.211               | 30.98                     | 67.68                 |
| 06115              | Yuba, CA                  | -0.383               | 16.46                     | 94.2                  |
| 08001              | Adams, CO                 | -0.265               | 26.3                      | 58.92                 |
| 08003              | Alamosa, CO               | 0.213                | 71.92                     | 94.52                 |
| 08005              | Arapahoe, CO              | -0.103               | 41.32                     | 26.62                 |
| 08007              | Archuleta, CO             | -0.752               | 3.57                      | 25.7                  |
| 08009              | Baca, CO                  | -0.019               | 50.24                     | 60.86                 |
| 08011              | Bent, CO                  | 1.614                | 99.65                     | 89.81                 |
| 08013              | Boulder, CO               | -0.008               | 51.13                     | 17.04                 |
| 08014              | Broomfield, CO            | -0.403               | 15.06                     | 4.9                   |
| 08015              | Chaffee, CO               | 0.003                | 51.99                     | 23.89                 |
| 08017              | Cheyenne, CO              | -0.455               | 12.19                     | 25.89                 |
| 08019              | Clear Creek, CO           | -0.401               | 15.19                     | 1.97                  |
| 08021              | Conejos, CO               | -0.041               | 47.5                      | 93.25                 |
| 08023              | Costilla, CO              | 0.299                | 78.13                     | 93.79                 |
| 08025              | Crowley, CO               | 1.422                | 99.27                     | 89.3                  |
| 08027              | Custer, CO                | -0.667               | 4.87                      | 24.33                 |
| 08029              | Delta, CO                 | -0.237               | 28.68                     | 68.66                 |
| 08031              | Denver, CO                | 0.201                | 70.97                     | 41.97                 |
| 08033              | Dolores, CO               | -0.136               | 38.24                     | 15.16                 |
| 08035              | Douglas, CO               | -0.582               | 7.32                      | 1.5                   |
| 08037              | Eagle, CO                 | -0.553               | 8.31                      | 13.69                 |
| 08039              | Elbert, CO                | -0.786               | 3.18                      | 0                     |
| 08041              | El Paso, CO               | -0.043               | 47.18                     | 39.27                 |

| County FIPS | County Description          | DOS-SVI Index | DOS-SVI Percentile | SVI Percentile |
|-------------|-----------------------------|---------------|--------------------|----------------|
| 08043       | Fremont, CO                 | 0.782         | 95.13              | 65.25          |
| 08045       | Garfield, CO                | -0.905        | 2.2                | 35.1           |
| 08047       | Gilpin, CO                  | -0.643        | 5.54               | 0.22           |
| 08049       | Grand, CO                   | -0.185        | 33.52              | 9.87           |
| 08051       | Gunnison, CO                | 0.175         | 69.18              | 13.92          |
| 08053       | Hinsdale, CO                | -0.579        | 7.42               | 6.24           |
| 08055       | Huerfano, CO                | -0.127        | 38.87              | 59.55          |
| 08057       | Jackson, CO                 | -0.401        | 15.22              | 11.37          |
| 08059       | Jefferson, CO               | -0.201        | 31.65              | 6.27           |
| 08061       | Kiowa, CO                   | -0.08         | 43.55              | 31.88          |
| 08063       | Kit Carson, CO              | 0.212         | 71.82              | 51.53          |
| 08065       | Lake, CO                    | 0.143         | 65.93              | 44.52          |
| 08067       | La Plata, CO                | -0.434        | 13.31              | 10.86          |
| 08069       | Larimer, CO                 | -0.061        | 45.59              | 11.94          |
| 08071       | Las Animas, CO              | 0.228         | 72.94              | 83.73          |
| 08073       | Lincoln, CO                 | 1.081         | 97.87              | 48.57          |
| 08075       | Logan, CO                   | -0.087        | 42.73              | 62.8           |
| 08077       | Mesa, CO                    | 0.043         | 56.16              | 57.55          |
| 08079       | Mineral, CO                 | -0.071        | 44.41              | 2.61           |
| 08081       | Moffat, CO                  | 0.069         | 58.9               | 54.71          |
| 08083       | Montezuma, CO               | -0.216        | 30.53              | 49.46          |
| 08085       | Montrose, CO                | -0.37         | 17.7               | 71.53          |
| 08087       | Morgan, CO                  | -0.249        | 27.67              | 74.14          |
| 08089       | Otero, CO                   | 0.768         | 94.87              | 95.61          |
| 08091       | Ouray, CO                   | -0.517        | 9.58               | 2.39           |
| 08093       | Park, CO                    | -0.637        | 5.76               | 0.06           |
| 08095       | Phillips, CO                | -1.098        | 1.18               | 29.55          |
| 08097       | Pitkin, CO                  | -0.051        | 46.61              | 6.56           |
| 08099       | Prowers, CO                 | 0.086         | 60.59              | 93.92          |
| 08101       | Pueblo, CO                  | 0.438         | 85.13              | 86.69          |
| 08103       | Rio Blanco, CO              | -0.379        | 16.78              | 34.01          |
| 08105       | Rio Grande, CO              | -0.224        | 29.77              | 95.86          |
| 08107       | Routt, CO                   | -0.318        | 22.19              | 6.34           |
| 08109       | Saguache, CO                | -0.878        | 2.36               | 80.7           |
| 08111       | San Juan, CO                | -0.608        | 6.4                | 12.83          |
| 08113       | San Miguel, CO              | -0.169        | 34.8               | 3.31           |
| 08115       | Sedgwick, CO                | -0.25         | 27.54              | 69.36          |
| 08117       | Summit, CO                  | -0.338        | 20.18              | 7.07           |
| 08119       | Teller, CO                  | -0.368        | 17.89              | 7.29           |
| 08121       | Washington, CO              | -0.191        | 32.82              | 28.22          |
| 08123       | Weld, CO                    | -0.307        | 23.05              | 39.94          |
| 08125       | Yuma, CO                    | -0.642        | 5.6                | 56.37          |
| 09001       | Fairfield, CT               | -0.47         | 11.53              | 44.97          |
| 09003       | Hartford, CT                | 0.036         | 55.52              | 51.5           |
| 09005       | Litchfield, CT              | -0.398        | 15.44              | 8.18           |
| 09007       | Middlesex, CT               | -0.227        | 29.55              | 11.82          |
| 09009       | New Haven, CT               | 0.052         | 57.43              | 52.23          |
| 09011       | New London, CT              | 0.128         | 64.18              | 35.61          |
| 09013       | Tolland, CT                 | 0.071         | 59.09              | 6.94           |
| 09015       | Windham, CT                 | 0.155         | 67.49              | 42.32          |
| 10001       | Kent, DE                    | 0.241         | 73.67              | 72.68          |
| 10003       | New Castle, DE              | 0.184         | 69.88              | 37.61          |
| 10005       | Sussex, DE                  | -0.33         | 20.95              | 40.19          |
| 11001       | District of Columbia,<br>DC | 0.311         | 78.99              | 59.65          |

| <b>County FIPS</b> | <b>County Description</b> | <b>DOS-SVI Index</b> | <b>DOS-SVI Percentile</b> | <b>SVI Percentile</b> |
|--------------------|---------------------------|----------------------|---------------------------|-----------------------|
| 12001              | Alachua, FL               | 0.607                | 91.4                      | 47.29                 |
| 12003              | Baker, FL                 | 0.197                | 70.71                     | 68.03                 |
| 12005              | Bay, FL                   | 0.326                | 79.75                     | 60.76                 |
| 12007              | Bradford, FL              | 0.72                 | 94.08                     | 92.64                 |
| 12009              | Brevard, FL               | 0.033                | 55.14                     | 37.13                 |
| 12011              | Broward, FL               | 0.241                | 73.64                     | 58.44                 |
| 12013              | Calhoun, FL               | 0.227                | 72.84                     | 84.01                 |
| 12015              | Charlotte, FL             | -0.307               | 23.14                     | 48.89                 |
| 12017              | Citrus, FL                | -0.186               | 33.3                      | 60.22                 |
| 12019              | Clay, FL                  | -0.063               | 45.24                     | 38.03                 |
| 12021              | Collier, FL               | -0.541               | 8.82                      | 46.18                 |
| 12023              | Columbia, FL              | 0.017                | 53.65                     | 85.96                 |
| 12027              | DeSoto, FL                | 0.164                | 68.42                     | 96.18                 |
| 12029              | Dixie, FL                 | 0.026                | 54.41                     | 89.94                 |
| 12031              | Duval, FL                 | 0.402                | 83.76                     | 69.2                  |
| 12033              | Escambia, FL              | 0.254                | 74.72                     | 48.63                 |
| 12035              | Flagler, FL               | -0.167               | 35.08                     | 27.99                 |
| 12037              | Franklin, FL              | 0.307                | 78.73                     | 80.83                 |
| 12039              | Gadsden, FL               | 0.699                | 93.76                     | 99.01                 |
| 12041              | Gilchrist, FL             | 0.328                | 79.81                     | 75.67                 |
| 12043              | Glades, FL                | 0.164                | 68.45                     | 90.48                 |
| 12045              | Gulf, FL                  | 0.689                | 93.63                     | 59.2                  |
| 12047              | Hamilton, FL              | 1.382                | 99.14                     | 99.08                 |
| 12049              | Hardee, FL                | -0.199               | 32                        | 98.31                 |
| 12051              | Hendry, FL                | -0.024               | 49.57                     | 99.39                 |
| 12053              | Hernando, FL              | 0.004                | 52.09                     | 54.9                  |
| 12055              | Highlands, FL             | -0.375               | 17.13                     | 87.29                 |
| 12057              | Hillsborough, FL          | 0.106                | 62.27                     | 67.01                 |
| 12059              | Holmes, FL                | 0.689                | 93.57                     | 93.47                 |
| 12061              | Indian River, FL          | -0.293               | 23.97                     | 39.62                 |
| 12063              | Jackson, FL               | 0.642                | 92.36                     | 95.83                 |
| 12065              | Jefferson, FL             | 0.486                | 87.3                      | 57.48                 |
| 12067              | Lafayette, FL             | 0.172                | 69.02                     | 98.06                 |
| 12069              | Lake, FL                  | -0.192               | 32.7                      | 60.29                 |
| 12071              | Lee, FL                   | -0.114               | 40.12                     | 55.25                 |
| 12073              | Leon, FL                  | 0.653                | 92.71                     | 49.43                 |
| 12075              | Levy, FL                  | -0.05                | 46.67                     | 77.93                 |
| 12077              | Liberty, FL               | 0.876                | 96.37                     | 83.34                 |
| 12079              | Madison, FL               | 0.45                 | 85.58                     | 96.08                 |
| 12081              | Manatee, FL               | -0.199               | 31.93                     | 51.97                 |
| 12083              | Marion, FL                | 0.012                | 52.91                     | 75.35                 |
| 12085              | Martin, FL                | -0.397               | 15.47                     | 39.9                  |
| 12086              | Miami-Dade, FL            | 0.071                | 59.12                     | 81.75                 |
| 12087              | Monroe, FL                | -0.449               | 12.67                     | 45.57                 |
| 12089              | Nassau, FL                | -0.132               | 38.46                     | 24.59                 |
| 12091              | Okaloosa, FL              | 0.104                | 62.11                     | 38.6                  |
| 12093              | Okeechobee, FL            | 0.081                | 60.24                     | 94.65                 |
| 12095              | Orange, FL                | 0.386                | 83.03                     | 66.91                 |
| 12097              | Osceola, FL               | 0.242                | 73.8                      | 81.78                 |
| 12099              | Palm Beach, FL            | -0.115               | 40.08                     | 55.92                 |
| 12101              | Pasco, FL                 | -0.069               | 44.86                     | 63.44                 |
| 12103              | Pinellas, FL              | 0.149                | 66.86                     | 51.69                 |
| 12105              | Polk, FL                  | -0.109               | 40.66                     | 90.35                 |
| 12107              | Putnam, FL                | 0.112                | 62.91                     | 95.25                 |
| 12109              | St. Johns, FL             | -0.307               | 23.11                     | 7.61                  |

| County FIPS | County Description | DOS-SVI Index | DOS-SVI Percentile | SVI Percentile |
|-------------|--------------------|---------------|--------------------|----------------|
| 12111       | St. Lucie, FL      | 0.07          | 58.99              | 71.85          |
| 12113       | Santa Rosa, FL     | -0.025        | 49.48              | 30.96          |
| 12115       | Sarasota, FL       | -0.333        | 20.66              | 25.38          |
| 12117       | Seminole, FL       | 0.007         | 52.44              | 18.44          |
| 12119       | Sumter, FL         | -0.603        | 6.56               | 23.6           |
| 12121       | Suwannee, FL       | 0.059         | 57.94              | 94.24          |
| 12123       | Taylor, FL         | 0.497         | 87.84              | 89.84          |
| 12125       | Union, FL          | 1.597         | 99.59              | 83.82          |
| 12127       | Volusia, FL        | 0.263         | 75.39              | 53.47          |
| 12129       | Wakulla, FL        | 0.247         | 74.21              | 40.32          |
| 12131       | Walton, FL         | -0.019        | 50.3               | 58.22          |
| 12133       | Washington, FL     | 0.674         | 93.28              | 89.39          |
| 13001       | Appling, GA        | 0.296         | 77.97              | 96.69          |
| 13003       | Atkinson, GA       | 0.275         | 76.34              | 96.15          |
| 13005       | Bacon, GA          | 0.559         | 89.94              | 93.89          |
| 13007       | Baker, GA          | -0.25         | 27.57              | 74.24          |
| 13009       | Baldwin, GA        | 0.867         | 96.21              | 86.66          |
| 13011       | Banks, GA          | -0.158        | 36.04              | 55.86          |
| 13013       | Barrow, GA         | 0.094         | 61.35              | 42.04          |
| 13015       | Bartow, GA         | 0.016         | 53.36              | 59.14          |
| 13017       | Ben Hill, GA       | 0.987         | 97.14              | 87.26          |
| 13019       | Berrien, GA        | 0.294         | 77.87              | 85             |
| 13021       | Bibb, GA           | 0.858         | 96.05              | 91.75          |
| 13023       | Bleckley, GA       | 0.697         | 93.73              | 73.95          |
| 13025       | Brantley, GA       | 0.084         | 60.49              | 62.29          |
| 13027       | Brooks, GA         | -0.023        | 49.73              | 83.98          |
| 13029       | Bryan, GA          | 0.216         | 72.14              | 33.89          |
| 13031       | Bulloch, GA        | 1.124         | 98.15              | 81.21          |
| 13033       | Burke, GA          | 0.24          | 73.45              | 84.55          |
| 13035       | Butts, GA          | 0.66          | 92.9               | 76.53          |
| 13037       | Calhoun, GA        | 2.122         | 99.97              | 97.74          |
| 13039       | Camden, GA         | 0.182         | 69.72              | 51.59          |
| 13043       | Candler, GA        | 0.581         | 90.67              | 98.28          |
| 13045       | Carroll, GA        | 0.412         | 84.14              | 78.25          |
| 13047       | Catoosa, GA        | -0.236        | 28.78              | 13.18          |
| 13049       | Charlton, GA       | 0.597         | 91.05              | 87.52          |
| 13051       | Chatham, GA        | 0.549         | 89.62              | 69.49          |
| 13053       | Chattahoochee, GA  | 1.089         | 97.96              | 63.79          |
| 13055       | Chattooga, GA      | -0.232        | 29.16              | 92.52          |
| 13057       | Cherokee, GA       | -0.371        | 17.57              | 11.85          |
| 13059       | Clarke, GA         | 1.082         | 97.93              | 76.75          |
| 13061       | Clay, GA           | 1.001         | 97.2               | 93.09          |
| 13063       | Clayton, GA        | 0.865         | 96.18              | 91.02          |
| 13065       | Clinch, GA         | 0.818         | 95.61              | 97.77          |
| 13067       | Cobb, GA           | 0.049         | 56.99              | 26.69          |
| 13069       | Coffee, GA         | 0.671         | 93.12              | 95.06          |
| 13071       | Colquitt, GA       | 0.24          | 73.42              | 98.12          |
| 13073       | Columbia, GA       | -0.137        | 38.2               | 13.34          |
| 13075       | Cook, GA           | 0.282         | 76.95              | 85.1           |
| 13077       | Coweta, GA         | -0.085        | 42.98              | 24.27          |
| 13079       | Crawford, GA       | 0.045         | 56.48              | 68.15          |
| 13081       | Crisp, GA          | 0.63          | 91.98              | 98.57          |
| 13083       | Dade, GA           | -0.021        | 49.86              | 51.56          |
| 13085       | Dawson, GA         | -0.554        | 8.28               | 10.38          |
| 13087       | Decatur, GA        | 0.249         | 74.37              | 94.55          |

| County FIPS | County Description | DOS-SVI Index | DOS-SVI Percentile | SVI Percentile |
|-------------|--------------------|---------------|--------------------|----------------|
| 13089       | DeKalb, GA         | 0.461         | 86.15              | 66.11          |
| 13091       | Dodge, GA          | 0.777         | 95.03              | 92.23          |
| 13093       | Dooly, GA          | 0.799         | 95.29              | 94.84          |
| 13095       | Dougherty, GA      | 1.233         | 98.76              | 95.13          |
| 13097       | Douglas, GA        | 0.463         | 86.25              | 54.04          |
| 13099       | Early, GA          | 0.299         | 78.16              | 92.01          |
| 13101       | Echols, GA         | 0.025         | 54.28              | 66.15          |
| 13103       | Effingham, GA      | -0.213        | 30.88              | 23.63          |
| 13105       | Elbert, GA         | 0.146         | 66.35              | 83.38          |
| 13107       | Emanuel, GA        | 0.812         | 95.45              | 97.68          |
| 13109       | Evans, GA          | 0.565         | 90.19              | 98.47          |
| 13111       | Fannin, GA         | -0.23         | 29.29              | 30.03          |
| 13113       | Fayette, GA        | -0.431        | 13.44              | 6.08           |
| 13115       | Floyd, GA          | 0.24          | 73.51              | 88.54          |
| 13117       | Forsyth, GA        | -0.634        | 5.86               | 3.73           |
| 13119       | Franklin, GA       | 0.31          | 78.96              | 84.62          |
| 13121       | Fulton, GA         | 0.53          | 88.79              | 52.68          |
| 13123       | Gilmer, GA         | -0.247        | 27.79              | 55.99          |
| 13125       | Glascocock, GA     | -0.451        | 12.54              | 68.6           |
| 13127       | Glynn, GA          | 0.249         | 74.4               | 71.59          |
| 13129       | Gordon, GA         | 0.132         | 64.47              | 88.06          |
| 13131       | Grady, GA          | 0.269         | 75.84              | 92.58          |
| 13133       | Greene, GA         | 0.114         | 63.13              | 53.79          |
| 13135       | Gwinnett, GA       | -0.049        | 46.7               | 43.47          |
| 13137       | Habersham, GA      | -0.161        | 35.63              | 71.46          |
| 13139       | Hall, GA           | -0.519        | 9.42               | 66.18          |
| 13141       | Hancock, GA        | 1.427         | 99.3               | 79.84          |
| 13143       | Haralson, GA       | 0.237         | 73.32              | 54.27          |
| 13145       | Harris, GA         | -0.235        | 28.97              | 13.41          |
| 13147       | Hart, GA           | 0.315         | 79.24              | 71.94          |
| 13149       | Heard, GA          | -0.167        | 35.05              | 72.32          |
| 13151       | Henry, GA          | 0.44          | 85.23              | 31.37          |
| 13153       | Houston, GA        | 0.113         | 63.01              | 56.69          |
| 13155       | Irwin, GA          | 0.663         | 93                 | 84.08          |
| 13157       | Jackson, GA        | -0.186        | 33.33              | 35.16          |
| 13159       | Jasper, GA         | -0.192        | 32.66              | 69.27          |
| 13161       | Jeff Davis, GA     | -0.032        | 48.52              | 93.73          |
| 13163       | Jefferson, GA      | 0.355         | 81.5               | 94.39          |
| 13165       | Jenkins, GA        | 0.389         | 83.19              | 82.83          |
| 13167       | Johnson, GA        | -0.016        | 50.59              | 90.61          |
| 13169       | Jones, GA          | 0.075         | 59.53              | 37.93          |
| 13171       | Lamar, GA          | 0.352         | 81.31              | 49.17          |
| 13173       | Lanier, GA         | 0.841         | 95.8               | 86.97          |
| 13175       | Laurens, GA        | 0.478         | 87.04              | 80.13          |
| 13177       | Lee, GA            | 0.099         | 61.76              | 35.19          |
| 13179       | Liberty, GA        | 0.564         | 90.13              | 88.82          |
| 13181       | Lincoln, GA        | 0.118         | 63.2               | 55.64          |
| 13183       | Long, GA           | 0.531         | 88.86              | 82.71          |
| 13185       | Lowndes, GA        | 0.551         | 89.75              | 86.62          |
| 13187       | Lumpkin, GA        | 0.313         | 79.08              | 43.38          |
| 13189       | McDuffie, GA       | 0.728         | 94.24              | 93.76          |
| 13191       | McIntosh, GA       | 0.325         | 79.72              | 58.63          |
| 13193       | Macon, GA          | 1.145         | 98.38              | 93.12          |
| 13195       | Madison, GA        | -0.021        | 49.92              | 64.17          |
| 13197       | Marion, GA         | 0.15          | 66.98              | 85.19          |

| County FIPS | County Description | DOS-SVI Index | DOS-SVI Percentile | SVI Percentile |
|-------------|--------------------|---------------|--------------------|----------------|
| 13199       | Meriwether, GA     | 0.515         | 88.28              | 87.01          |
| 13201       | Miller, GA         | -0.44         | 13.02              | 77.99          |
| 13205       | Mitchell, GA       | 0.93          | 96.78              | 98.79          |
| 13207       | Monroe, GA         | -0.223        | 29.89              | 45.96          |
| 13209       | Montgomery, GA     | 0.242         | 73.77              | 84.65          |
| 13211       | Morgan, GA         | -0.222        | 30.02              | 24.46          |
| 13213       | Murray, GA         | -0.188        | 33.08              | 71.34          |
| 13215       | Muscogee, GA       | 0.814         | 95.51              | 90.03          |
| 13217       | Newton, GA         | 0.46          | 86.12              | 70.7           |
| 13219       | Oconee, GA         | -0.604        | 6.53               | 3.54           |
| 13221       | Oglethorpe, GA     | -0.008        | 51.1               | 52.17          |
| 13223       | Paulding, GA       | -0.048        | 46.74              | 13.76          |
| 13225       | Peach, GA          | 0.826         | 95.67              | 94.04          |
| 13227       | Pickens, GA        | -0.478        | 11.24              | 27.96          |
| 13229       | Pierce, GA         | 0.466         | 86.41              | 65.7           |
| 13231       | Pike, GA           | -0.352        | 19.17              | 15.1           |
| 13233       | Polk, GA           | -0.007        | 51.19              | 80.48          |
| 13235       | Pulaski, GA        | 1.437         | 99.36              | 84.59          |
| 13237       | Putnam, GA         | -0.113        | 40.27              | 42.8           |
| 13239       | Quitman, GA        | 0.212         | 71.79              | 94.33          |
| 13241       | Rabun, GA          | -0.113        | 40.31              | 53.41          |
| 13243       | Randolph, GA       | 0.602         | 91.25              | 97.39          |
| 13245       | Richmond, GA       | 0.927         | 96.72              | 93.28          |
| 13247       | Rockdale, GA       | 0.489         | 87.42              | 55.29          |
| 13249       | Schley, GA         | 0.334         | 80.36              | 82.48          |
| 13251       | Screven, GA        | 0.099         | 61.8               | 85.25          |
| 13253       | Seminole, GA       | -0.226        | 29.58              | 83.44          |
| 13255       | Spalding, GA       | 0.545         | 89.46              | 86.91          |
| 13257       | Stephens, GA       | -0.076        | 43.94              | 79.68          |
| 13259       | Stewart, GA        | 1.87          | 99.87              | 92.45          |
| 13261       | Sumter, GA         | 0.907         | 96.59              | 97.64          |
| 13263       | Talbot, GA         | 0.127         | 64.15              | 85.89          |
| 13265       | Taliaferro, GA     | 0.637         | 92.2               | 90.89          |
| 13267       | Tattall, GA        | 1.034         | 97.48              | 90.8           |
| 13269       | Taylor, GA         | 0.358         | 81.76              | 91.97          |
| 13271       | Telfair, GA        | 1.177         | 98.5               | 83.69          |
| 13273       | Terrell, GA        | 0.9           | 96.5               | 95.7           |
| 13275       | Thomas, GA         | 0.345         | 80.99              | 91.08          |
| 13277       | Tift, GA           | 0.561         | 90.03              | 88.09          |
| 13279       | Toombs, GA         | 0.102         | 62.02              | 97.61          |
| 13281       | Towns, GA          | 0.187         | 70.23              | 32.58          |
| 13283       | Treutlen, GA       | 0.079         | 59.85              | 94.71          |
| 13285       | Troup, GA          | 0.673         | 93.25              | 90.13          |
| 13287       | Turner, GA         | 1.121         | 98.09              | 98.09          |
| 13289       | Twiggs, GA         | 0.706         | 93.92              | 75.8           |
| 13291       | Union, GA          | -0.148        | 37.12              | 31.15          |
| 13293       | Upson, GA          | 0.235         | 73.29              | 85.32          |
| 13295       | Walker, GA         | 0.147         | 66.48              | 64.08          |
| 13297       | Walton, GA         | 0.06          | 58.01              | 29.3           |
| 13299       | Ware, GA           | 0.688         | 93.54              | 84.49          |
| 13301       | Warren, GA         | 0.527         | 88.67              | 89.46          |
| 13303       | Washington, GA     | 0.758         | 94.72              | 94.62          |
| 13305       | Wayne, GA          | 0.04          | 55.87              | 91.66          |
| 13307       | Webster, GA        | 0.563         | 90.1               | 78.76          |
| 13309       | Wheeler, GA        | 0.677         | 93.44              | 81.24          |

| <b>County FIPS</b> | <b>County Description</b> | <b>DOS-SVI Index</b> | <b>DOS-SVI Percentile</b> | <b>SVI Percentile</b> |
|--------------------|---------------------------|----------------------|---------------------------|-----------------------|
| 13311              | White, GA                 | -0.158               | 35.98                     | 23.57                 |
| 13313              | Whitfield, GA             | -0.519               | 9.36                      | 87.93                 |
| 13315              | Wilcox, GA                | 1.019                | 97.33                     | 81.69                 |
| 13317              | Wilkes, GA                | 0.437                | 85.1                      | 75.61                 |
| 13319              | Wilkinson, GA             | 0.156                | 67.56                     | 78.73                 |
| 13321              | Worth, GA                 | 0.599                | 91.15                     | 73.57                 |
| 15001              | Hawaii, HI                | -0.518               | 9.52                      | 57.71                 |
| 15003              | Honolulu, HI              | -0.901               | 2.26                      | 47.2                  |
| 15005              | Kalawao, HI               | 0.282                | 76.89                     | 31.62                 |
| 15007              | Kauai, HI                 | -0.963               | 1.75                      | 30.99                 |
| 15009              | Maui, HI                  | -1.073               | 1.27                      | 38.79                 |
| 16001              | Ada, ID                   | -0.179               | 33.97                     | 13.73                 |
| 16003              | Adams, ID                 | -0.245               | 27.98                     | 29.36                 |
| 16005              | Bannock, ID               | 0.009                | 52.56                     | 57.9                  |
| 16007              | Bear Lake, ID             | -0.331               | 20.85                     | 21.43                 |
| 16009              | Benewah, ID               | -0.556               | 8.21                      | 73.34                 |
| 16011              | Bingham, ID               | -0.381               | 16.62                     | 50.7                  |
| 16013              | Blaine, ID                | -0.026               | 49.22                     | 32.39                 |
| 16015              | Boise, ID                 | -0.325               | 21.55                     | 6.72                  |
| 16017              | Bonner, ID                | -0.213               | 30.91                     | 24.01                 |
| 16019              | Bonneville, ID            | -0.384               | 16.43                     | 36.34                 |
| 16021              | Boundary, ID              | -0.512               | 9.77                      | 30.83                 |
| 16023              | Butte, ID                 | -0.29                | 24.2                      | 24.62                 |
| 16025              | Camas, ID                 | -0.367               | 17.99                     | 13.38                 |
| 16027              | Canyon, ID                | -0.282               | 24.83                     | 73.66                 |
| 16029              | Caribou, ID               | -0.787               | 3.15                      | 19.17                 |
| 16031              | Cassia, ID                | -0.316               | 22.29                     | 67.32                 |
| 16033              | Clark, ID                 | -1.348               | 0.51                      | 89.11                 |
| 16035              | Clearwater, ID            | 0.157                | 67.62                     | 44.01                 |
| 16037              | Custer, ID                | 0.046                | 56.61                     | 43.69                 |
| 16039              | Elmore, ID                | 0.027                | 54.51                     | 58.82                 |
| 16041              | Franklin, ID              | -0.695               | 4.23                      | 14.14                 |
| 16043              | Fremont, ID               | -0.638               | 5.73                      | 51.37                 |
| 16045              | Gem, ID                   | 0.179                | 69.53                     | 66.27                 |
| 16047              | Gooding, ID               | -0.606               | 6.43                      | 70.76                 |
| 16049              | Idaho, ID                 | -0.466               | 11.68                     | 53.92                 |
| 16051              | Jefferson, ID             | -0.904               | 2.23                      | 25.25                 |
| 16053              | Jerome, ID                | -0.664               | 4.9                       | 67.36                 |
| 16055              | Kootenai, ID              | -0.065               | 45.18                     | 23.28                 |
| 16057              | Latah, ID                 | 0.43                 | 84.78                     | 24.84                 |
| 16059              | Lemhi, ID                 | -0.556               | 8.18                      | 29.97                 |
| 16061              | Lewis, ID                 | -0.395               | 15.63                     | 56.78                 |
| 16063              | Lincoln, ID               | -0.859               | 2.52                      | 55.76                 |
| 16065              | Madison, ID               | -0.157               | 36.1                      | 40.29                 |
| 16067              | Minidoka, ID              | -0.147               | 37.22                     | 67.83                 |
| 16069              | Nez Perce, ID             | 0.05                 | 57.21                     | 50.67                 |
| 16071              | Oneida, ID                | -0.652               | 5.29                      | 34.24                 |
| 16073              | Owyhee, ID                | -0.539               | 8.91                      | 82.45                 |
| 16075              | Payette, ID               | -0.766               | 3.47                      | 60.1                  |
| 16077              | Power, ID                 | -0.813               | 2.87                      | 51.62                 |
| 16079              | Shoshone, ID              | 0.01                 | 52.72                     | 75.7                  |
| 16081              | Teton, ID                 | -0.569               | 7.74                      | 13.44                 |
| 16083              | Twin Falls, ID            | -0.203               | 31.49                     | 49.55                 |
| 16085              | Valley, ID                | -0.232               | 29.2                      | 8.82                  |
| 16087              | Washington, ID            | 0.124                | 63.87                     | 85.06                 |

| <b>County FIPS</b> | <b>County Description</b> | <b>DOS-SVI Index</b> | <b>DOS-SVI Percentile</b> | <b>SVI Percentile</b> |
|--------------------|---------------------------|----------------------|---------------------------|-----------------------|
| 17001              | Adams, IL                 | -0.033               | 48.36                     | 24.9                  |
| 17003              | Alexander, IL             | 1.046                | 97.52                     | 95.73                 |
| 17005              | Bond, IL                  | -0.141               | 37.89                     | 37.32                 |
| 17007              | Boone, IL                 | -0.248               | 27.7                      | 46.97                 |
| 17009              | Brown, IL                 | 0.724                | 94.14                     | 47.45                 |
| 17011              | Bureau, IL                | 0.017                | 53.42                     | 28.63                 |
| 17013              | Calhoun, IL               | -0.35                | 19.29                     | 19.01                 |
| 17015              | Carroll, IL               | -0.144               | 37.57                     | 16.82                 |
| 17017              | Cass, IL                  | -0.139               | 38.11                     | 69.71                 |
| 17019              | Champaign, IL             | 0.118                | 63.26                     | 49.9                  |
| 17021              | Christian, IL             | 0.219                | 72.4                      | 24.08                 |
| 17023              | Clark, IL                 | -0.062               | 45.56                     | 20.73                 |
| 17025              | Clay, IL                  | 0.05                 | 57.08                     | 61.15                 |
| 17027              | Clinton, IL               | -0.096               | 41.99                     | 17.87                 |
| 17029              | Coles, IL                 | 0.745                | 94.49                     | 49.78                 |
| 17031              | Cook, IL                  | -0.055               | 46.07                     | 67.55                 |
| 17033              | Crawford, IL              | 0.26                 | 75.17                     | 38.38                 |
| 17035              | Cumberland, IL            | -0.154               | 36.55                     | 16.27                 |
| 17037              | DeKalb, IL                | 0.442                | 85.39                     | 48.66                 |
| 17039              | De Witt, IL               | -0.161               | 35.56                     | 12.9                  |
| 17041              | Douglas, IL               | -0.455               | 12.26                     | 44.39                 |
| 17043              | DuPage, IL                | -0.439               | 13.12                     | 16.11                 |
| 17045              | Edgar, IL                 | 0.17                 | 68.74                     | 34.33                 |
| 17047              | Edwards, IL               | -0.329               | 21.11                     | 24.43                 |
| 17049              | Effingham, IL             | -0.272               | 25.63                     | 19.9                  |
| 17051              | Fayette, IL               | 0.391                | 83.38                     | 59.49                 |
| 17053              | Ford, IL                  | 0.259                | 75.1                      | 30.51                 |
| 17055              | Franklin, IL              | 0.279                | 76.69                     | 60.92                 |
| 17057              | Fulton, IL                | 0.476                | 87.01                     | 57.61                 |
| 17059              | Gallatin, IL              | 0.344                | 80.93                     | 45.38                 |
| 17061              | Greene, IL                | 0.108                | 62.4                      | 19.52                 |
| 17063              | Grundy, IL                | -0.286               | 24.55                     | 8.44                  |
| 17065              | Hamilton, IL              | -0.212               | 30.95                     | 15.29                 |
| 17067              | Hancock, IL               | -0.215               | 30.59                     | 12.32                 |
| 17069              | Hardin, IL                | 0.082                | 60.27                     | 50.19                 |
| 17071              | Henderson, IL             | -0.255               | 27.09                     | 6.69                  |
| 17073              | Henry, IL                 | -0.075               | 44.06                     | 20.1                  |
| 17075              | Iroquois, IL              | -0.125               | 39.06                     | 34.04                 |
| 17077              | Jackson, IL               | 0.904                | 96.53                     | 70.45                 |
| 17079              | Jasper, IL                | -0.277               | 25.28                     | 24.17                 |
| 17081              | Jefferson, IL             | 0.476                | 86.95                     | 81.08                 |
| 17083              | Jersey, IL                | -0.203               | 31.45                     | 10.41                 |
| 17085              | Jo Daviess, IL            | -0.497               | 10.38                     | 5.25                  |
| 17087              | Johnson, IL               | 0.485                | 87.27                     | 46.24                 |
| 17089              | Kane, IL                  | -0.48                | 11.18                     | 41.69                 |
| 17091              | Kankakee, IL              | 0.261                | 75.29                     | 66.56                 |
| 17093              | Kendall, IL               | -0.422               | 14.01                     | 13.98                 |
| 17095              | Knox, IL                  | 0.396                | 83.57                     | 64.62                 |
| 17097              | Lake, IL                  | -0.364               | 18.11                     | 35.13                 |
| 17099              | LaSalle, IL               | 0.109                | 62.53                     | 43.03                 |
| 17101              | Lawrence, IL              | 0.535                | 89.14                     | 77.83                 |
| 17103              | Lee, IL                   | 0.141                | 65.74                     | 30.1                  |
| 17105              | Livingston, IL            | 0.31                 | 78.89                     | 48.41                 |
| 17107              | Logan, IL                 | 0.326                | 79.78                     | 22.71                 |
| 17109              | McDonough, IL             | 0.677                | 93.38                     | 51.66                 |



| County FIPS | County Description | DOS-SVI Index | DOS-SVI Percentile | SVI Percentile |
|-------------|--------------------|---------------|--------------------|----------------|
| 17111       | McHenry, IL        | -0.432        | 13.4               | 7.01           |
| 17113       | McLean, IL         | 0.166         | 68.51              | 19.04          |
| 17115       | Macon, IL          | 0.36          | 81.89              | 59.71          |
| 17117       | Macoupin, IL       | -0.022        | 49.83              | 19.87          |
| 17119       | Madison, IL        | 0.03          | 54.79              | 29.65          |
| 17121       | Marion, IL         | 0.235         | 73.26              | 73.85          |
| 17123       | Marshall, IL       | -0.191        | 32.89              | 5.45           |
| 17125       | Mason, IL          | 0.152         | 67.18              | 29.46          |
| 17127       | Massac, IL         | 0.048         | 56.92              | 75.13          |
| 17129       | Menard, IL         | -0.208        | 31.14              | 4.84           |
| 17131       | Mercer, IL         | -0.076        | 44                 | 11.34          |
| 17133       | Monroe, IL         | -0.579        | 7.48               | 0.16           |
| 17135       | Montgomery, IL     | 0.281         | 76.86              | 39.14          |
| 17137       | Morgan, IL         | 0.555         | 89.84              | 50.45          |
| 17139       | Moultrie, IL       | -0.739        | 3.73               | 29.49          |
| 17141       | Ogle, IL           | -0.264        | 26.33              | 29.17          |
| 17143       | Peoria, IL         | 0.39          | 83.29              | 61.31          |
| 17145       | Perry, IL          | 0.703         | 93.89              | 64.87          |
| 17147       | Piatt, IL          | -0.372        | 17.48              | 0.32           |
| 17149       | Pike, IL           | 0.063         | 58.33              | 34.94          |
| 17151       | Pope, IL           | -0.01         | 50.97              | 45.45          |
| 17153       | Pulaski, IL        | 0.18          | 69.56              | 69.43          |
| 17155       | Putnam, IL         | -0.346        | 19.58              | 2.77           |
| 17157       | Randolph, IL       | 0.472         | 86.79              | 45.67          |
| 17159       | Richland, IL       | 0.097         | 61.51              | 41.05          |
| 17161       | Rock Island, IL    | 0.284         | 77.11              | 71.37          |
| 17163       | St. Clair, IL      | 0.29          | 77.46              | 52.29          |
| 17165       | Saline, IL         | 0.46          | 86.02              | 86.37          |
| 17167       | Sangamon, IL       | 0.151         | 67.05              | 43.57          |
| 17169       | Schuyler, IL       | 0.884         | 96.43              | 57.07          |
| 17171       | Scott, IL          | -0.266        | 26.2               | 13.54          |
| 17173       | Shelby, IL         | -0.332        | 20.79              | 8.5            |
| 17175       | Stark, IL          | -0.023        | 49.76              | 6.34           |
| 17177       | Stephenson, IL     | 0.427         | 84.75              | 50             |
| 17179       | Tazewell, IL       | -0.218        | 30.37              | 10.7           |
| 17181       | Union, IL          | 0.037         | 55.75              | 68.44          |
| 17183       | Vermilion, IL      | 0.423         | 84.56              | 81.31          |
| 17185       | Wabash, IL         | -0.153        | 36.68              | 32.07          |
| 17187       | Warren, IL         | -0.141        | 37.92              | 60.73          |
| 17189       | Washington, IL     | -0.484        | 10.89              | 6.53           |
| 17191       | Wayne, IL          | -0.318        | 22.16              | 43.31          |
| 17193       | White, IL          | 0.017         | 53.52              | 53.82          |
| 17195       | Whiteside, IL      | -0.042        | 47.44              | 32.83          |
| 17197       | Will, IL           | -0.32         | 22                 | 20.22          |
| 17199       | Williamson, IL     | 0.177         | 69.34              | 48.06          |
| 17201       | Winnebago, IL      | 0.262         | 75.33              | 72.04          |
| 17203       | Woodford, IL       | -0.429        | 13.53              | 1.88           |
| 18001       | Adams, IN          | -0.646        | 5.44               | 59.04          |
| 18003       | Allen, IN          | 0.249         | 74.44              | 52.36          |
| 18005       | Bartholomew, IN    | -0.198        | 32.06              | 36.31          |
| 18007       | Benton, IN         | 0.177         | 69.41              | 33.47          |
| 18009       | Blackford, IN      | -0.031        | 48.68              | 37.1           |
| 18011       | Boone, IN          | -0.477        | 11.3               | 4.49           |
| 18013       | Brown, IN          | -0.4          | 15.25              | 6.02           |
| 18015       | Carroll, IN        | -0.377        | 17                 | 11.75          |

| <b>County FIPS</b> | <b>County Description</b> | <b>DOS-SVI Index</b> | <b>DOS-SVI Percentile</b> | <b>SVI Percentile</b> |
|--------------------|---------------------------|----------------------|---------------------------|-----------------------|
| 18017              | Cass, IN                  | 0.106                | 62.21                     | 71.97                 |
| 18019              | Clark, IN                 | 0.064                | 58.36                     | 25.48                 |
| 18021              | Clay, IN                  | 0.039                | 55.81                     | 33.38                 |
| 18023              | Clinton, IN               | -0.142               | 37.73                     | 57.1                  |
| 18025              | Crawford, IN              | -0.083               | 43.36                     | 38.89                 |
| 18027              | Daviess, IN               | -0.464               | 11.72                     | 68.82                 |
| 18029              | Dearborn, IN              | -0.079               | 43.68                     | 7.99                  |
| 18031              | Decatur, IN               | 0.065                | 58.55                     | 21.02                 |
| 18033              | DeKalb, IN                | 0.181                | 69.66                     | 23.34                 |
| 18035              | Delaware, IN              | 0.629                | 91.88                     | 56.66                 |
| 18037              | Dubois, IN                | -0.329               | 21.14                     | 20.8                  |
| 18039              | Elkhart, IN               | 0.049                | 57.02                     | 77.01                 |
| 18041              | Fayette, IN               | 0.234                | 73.22                     | 61.08                 |
| 18043              | Floyd, IN                 | 0.119                | 63.39                     | 16.69                 |
| 18045              | Fountain, IN              | -0.205               | 31.33                     | 20.32                 |
| 18047              | Franklin, IN              | -0.147               | 37.15                     | 14.71                 |
| 18049              | Fulton, IN                | -0.117               | 39.86                     | 34.59                 |
| 18051              | Gibson, IN                | -0.187               | 33.21                     | 31.5                  |
| 18053              | Grant, IN                 | 0.863                | 96.15                     | 73.31                 |
| 18055              | Greene, IN                | -0.368               | 17.92                     | 44.43                 |
| 18057              | Hamilton, IN              | -0.453               | 12.38                     | 2.55                  |
| 18059              | Hancock, IN               | -0.223               | 29.83                     | 1.69                  |
| 18061              | Harrison, IN              | -0.177               | 34.13                     | 18.66                 |
| 18063              | Hendricks, IN             | -0.217               | 30.44                     | 8.15                  |
| 18065              | Henry, IN                 | 0.441                | 85.32                     | 37.93                 |
| 18067              | Howard, IN                | 0.347                | 81.06                     | 48.15                 |
| 18069              | Huntington, IN            | -0.069               | 44.83                     | 12.48                 |
| 18071              | Jackson, IN               | 0.163                | 68.29                     | 53.89                 |
| 18073              | Jasper, IN                | -0.159               | 35.85                     | 26.85                 |
| 18075              | Jay, IN                   | -0.093               | 42.31                     | 67.48                 |
| 18077              | Jefferson, IN             | 0.425                | 84.66                     | 44.14                 |
| 18079              | Jennings, IN              | -0.102               | 41.55                     | 38.47                 |
| 18081              | Johnson, IN               | -0.101               | 41.61                     | 14.24                 |
| 18083              | Knox, IN                  | 0.534                | 89.05                     | 59.27                 |
| 18085              | Kosciusko, IN             | -0.232               | 29.13                     | 46.08                 |
| 18087              | LaGrange, IN              | -1.09                | 1.21                      | 37.07                 |
| 18089              | Lake, IN                  | 0.284                | 77.08                     | 72.52                 |
| 18091              | LaPorte, IN               | 0.304                | 78.45                     | 72.17                 |
| 18093              | Lawrence, IN              | -0.005               | 51.32                     | 27.52                 |
| 18095              | Madison, IN               | 0.474                | 86.88                     | 67.13                 |
| 18097              | Marion, IN                | 0.533                | 88.92                     | 79.71                 |
| 18099              | Marshall, IN              | -0.538               | 8.98                      | 57.96                 |
| 18101              | Martin, IN                | 0.004                | 52.18                     | 23.98                 |
| 18103              | Miami, IN                 | 0.322                | 79.62                     | 58.79                 |
| 18105              | Monroe, IN                | 0.842                | 95.83                     | 45.19                 |
| 18107              | Montgomery, IN            | -0.002               | 51.54                     | 36.85                 |
| 18109              | Morgan, IN                | -0.135               | 38.33                     | 21.56                 |
| 18111              | Newton, IN                | 0.146                | 66.32                     | 33.66                 |
| 18113              | Noble, IN                 | -0.258               | 26.81                     | 47.42                 |
| 18115              | Ohio, IN                  | -0.259               | 26.68                     | 2.52                  |
| 18117              | Orange, IN                | 0.149                | 66.79                     | 64.55                 |
| 18119              | Owen, IN                  | -0.154               | 36.64                     | 34.55                 |
| 18121              | Parke, IN                 | -0.173               | 34.51                     | 58.09                 |
| 18123              | Perry, IN                 | 0.398                | 83.7                      | 31.02                 |
| 18125              | Pike, IN                  | -0.195               | 32.41                     | 17.45                 |

| <b>County FIPS</b> | <b>County Description</b> | <b>DOS-SVI Index</b> | <b>DOS-SVI Percentile</b> | <b>SVI Percentile</b> |
|--------------------|---------------------------|----------------------|---------------------------|-----------------------|
| 18127              | Porter, IN                | -0.043               | 47.21                     | 14.78                 |
| 18129              | Posey, IN                 | -0.276               | 25.47                     | 1.05                  |
| 18131              | Pulaski, IN               | -0.077               | 43.87                     | 23.09                 |
| 18133              | Putnam, IN                | 0.298                | 78.1                      | 34.84                 |
| 18135              | Randolph, IN              | 0.215                | 72.11                     | 42.96                 |
| 18137              | Ripley, IN                | -0.326               | 21.39                     | 37.74                 |
| 18139              | Rush, IN                  | 0.211                | 71.67                     | 25.67                 |
| 18141              | St. Joseph, IN            | 0.354                | 81.47                     | 62.23                 |
| 18143              | Scott, IN                 | 0.135                | 64.82                     | 42.01                 |
| 18145              | Shelby, IN                | -0.064               | 45.21                     | 21.82                 |
| 18147              | Spencer, IN               | -0.363               | 18.24                     | 8.79                  |
| 18149              | Starke, IN                | -0.169               | 34.86                     | 34.17                 |
| 18151              | Steuben, IN               | -0.011               | 50.91                     | 27.1                  |
| 18153              | Sullivan, IN              | 0.472                | 86.82                     | 64.01                 |
| 18155              | Switzerland, IN           | -0.184               | 33.62                     | 62.71                 |
| 18157              | Tippecanoe, IN            | 0.664                | 93.03                     | 49.3                  |
| 18159              | Tipton, IN                | -0.299               | 23.66                     | 7.26                  |
| 18161              | Union, IN                 | -0.186               | 33.4                      | 17.13                 |
| 18163              | Vanderburgh, IN           | 0.413                | 84.21                     | 52.42                 |
| 18165              | Vermillion, IN            | 0.068                | 58.71                     | 45.03                 |
| 18167              | Vigo, IN                  | 0.596                | 91.02                     | 72.74                 |
| 18169              | Wabash, IN                | 0.131                | 64.31                     | 28.82                 |
| 18171              | Warren, IN                | -0.16                | 35.66                     | 7.8                   |
| 18173              | Warrick, IN               | -0.407               | 14.74                     | 6.78                  |
| 18175              | Washington, IN            | 0.069                | 58.84                     | 37.77                 |
| 18177              | Wayne, IN                 | 0.46                 | 86.09                     | 71.05                 |
| 18179              | Wells, IN                 | -0.085               | 42.95                     | 14.39                 |
| 18181              | White, IN                 | -0.316               | 22.35                     | 24.39                 |
| 18183              | Whitley, IN               | -0.072               | 44.38                     | 3.15                  |
| 19001              | Adair, IA                 | -0.158               | 36.01                     | 5.38                  |
| 19003              | Adams, IA                 | -0.288               | 24.29                     | 3.76                  |
| 19005              | Allamakee, IA             | -0.549               | 8.53                      | 32.2                  |
| 19007              | Appanoose, IA             | -0.288               | 24.32                     | 37.83                 |
| 19009              | Audubon, IA               | -0.183               | 33.68                     | 2.26                  |
| 19011              | Benton, IA                | -0.335               | 20.38                     | 1.18                  |
| 19013              | Black Hawk, IA            | 0.31                 | 78.83                     | 42.64                 |
| 19015              | Boone, IA                 | -0.224               | 29.74                     | 11.78                 |
| 19017              | Bremer, IA                | -0.177               | 34.16                     | 3.22                  |
| 19019              | Buchanan, IA              | -0.321               | 21.94                     | 6.62                  |
| 19021              | Buena Vista, IA           | -0.579               | 7.45                      | 74.08                 |
| 19023              | Butler, IA                | -0.371               | 17.54                     | 2.36                  |
| 19025              | Calhoun, IA               | 0.092                | 61.22                     | 15.8                  |
| 19027              | Carroll, IA               | -0.188               | 33.14                     | 4.55                  |
| 19029              | Cass, IA                  | -0.03                | 48.74                     | 19.81                 |
| 19031              | Cedar, IA                 | -0.497               | 10.35                     | 0.8                   |
| 19033              | Cerro Gordo, IA           | 0.071                | 59.06                     | 24.97                 |
| 19035              | Cherokee, IA              | 0.023                | 54.12                     | 17.01                 |
| 19037              | Chickasaw, IA             | -0.404               | 14.99                     | 5.99                  |
| 19039              | Clarke, IA                | -0.36                | 18.5                      | 48.47                 |
| 19041              | Clay, IA                  | -0.068               | 44.89                     | 34.39                 |
| 19043              | Clayton, IA               | -0.373               | 17.41                     | 18.41                 |
| 19045              | Clinton, IA               | 0.18                 | 69.63                     | 26.46                 |
| 19047              | Crawford, IA              | -0.362               | 18.27                     | 85.51                 |
| 19049              | Dallas, IA                | -0.589               | 7.13                      | 5.96                  |
| 19051              | Davis, IA                 | -1.459               | 0.45                      | 35.03                 |

| <b>County FIPS</b> | <b>County Description</b> | <b>DOS-SVI Index</b> | <b>DOS-SVI Percentile</b> | <b>SVI Percentile</b> |
|--------------------|---------------------------|----------------------|---------------------------|-----------------------|
| 19053              | Decatur, IA               | 0.199                | 70.87                     | 68.22                 |
| 19055              | Delaware, IA              | -0.439               | 13.05                     | 3.44                  |
| 19057              | Des Moines, IA            | 0.359                | 81.85                     | 46.53                 |
| 19059              | Dickinson, IA             | -0.197               | 32.31                     | 9.17                  |
| 19061              | Dubuque, IA               | 0.021                | 53.96                     | 23.47                 |
| 19063              | Emmet, IA                 | -0.028               | 49.06                     | 39.46                 |
| 19065              | Fayette, IA               | 0.17                 | 68.8                      | 22.52                 |
| 19067              | Floyd, IA                 | -0.086               | 42.85                     | 35.96                 |
| 19069              | Franklin, IA              | 0.021                | 54                        | 19.62                 |
| 19071              | Fremont, IA               | -0.449               | 12.61                     | 5.54                  |
| 19073              | Greene, IA                | -0.347               | 19.42                     | 19.78                 |
| 19075              | Grundy, IA                | -0.516               | 9.68                      | 0.38                  |
| 19077              | Guthrie, IA               | -0.189               | 32.98                     | 12.2                  |
| 19079              | Hamilton, IA              | -0.338               | 20.12                     | 11.53                 |
| 19081              | Hancock, IA               | -0.375               | 17.07                     | 7.13                  |
| 19083              | Hardin, IA                | -0.324               | 21.65                     | 12.42                 |
| 19085              | Harrison, IA              | -0.166               | 35.18                     | 6.46                  |
| 19087              | Henry, IA                 | 0.377                | 82.58                     | 31.34                 |
| 19089              | Howard, IA                | -0.124               | 39.35                     | 15.67                 |
| 19091              | Humboldt, IA              | -0.201               | 31.71                     | 14.46                 |
| 19093              | Ida, IA                   | -0.323               | 21.68                     | 8.66                  |
| 19095              | Iowa, IA                  | -0.347               | 19.39                     | 3.47                  |
| 19097              | Jackson, IA               | -0.035               | 48.2                      | 12.68                 |
| 19099              | Jasper, IA                | -0.028               | 48.97                     | 25.48                 |
| 19101              | Jefferson, IA             | 0.193                | 70.49                     | 48.95                 |
| 19103              | Johnson, IA               | 0.199                | 70.81                     | 26.75                 |
| 19105              | Jones, IA                 | -0.241               | 28.4                      | 19.24                 |
| 19107              | Keokuk, IA                | -0.269               | 25.88                     | 3.98                  |
| 19109              | Kossuth, IA               | -0.112               | 40.43                     | 10.48                 |
| 19111              | Lee, IA                   | 0.303                | 78.38                     | 50.41                 |
| 19113              | Linn, IA                  | -0.052               | 46.35                     | 18.06                 |
| 19115              | Louisa, IA                | -0.496               | 10.41                     | 45.7                  |
| 19117              | Lucas, IA                 | -0.083               | 43.27                     | 27.55                 |
| 19119              | Lyon, IA                  | -0.512               | 9.81                      | 4.39                  |
| 19121              | Madison, IA               | -0.404               | 14.9                      | 2.04                  |
| 19123              | Mahaska, IA               | 0.005                | 52.31                     | 46.37                 |
| 19125              | Marion, IA                | -0.104               | 41.07                     | 19.49                 |
| 19127              | Marshall, IA              | -0.368               | 17.83                     | 68.63                 |
| 19129              | Mills, IA                 | -0.241               | 28.49                     | 10.76                 |
| 19131              | Mitchell, IA              | -0.334               | 20.47                     | 8.6                   |
| 19133              | Monona, IA                | 0.094                | 61.38                     | 17.96                 |
| 19135              | Monroe, IA                | -0.325               | 21.52                     | 25.19                 |
| 19137              | Montgomery, IA            | 0.138                | 65.27                     | 52.8                  |
| 19139              | Muscatine, IA             | -0.058               | 45.81                     | 39.04                 |
| 19141              | O'Brien, IA               | -0.409               | 14.58                     | 23.22                 |
| 19143              | Osceola, IA               | -0.481               | 10.98                     | 26.34                 |
| 19145              | Page, IA                  | 0.173                | 69.05                     | 33.41                 |
| 19147              | Palo Alto, IA             | -0.381               | 16.65                     | 17.29                 |
| 19149              | Plymouth, IA              | -0.176               | 34.23                     | 12.71                 |
| 19151              | Pocahontas, IA            | -0.214               | 30.69                     | 14.62                 |
| 19153              | Polk, IA                  | 0.005                | 52.34                     | 37.68                 |
| 19155              | Pottawattamie, IA         | 0.048                | 56.83                     | 45.99                 |
| 19157              | Poweshiek, IA             | 0.148                | 66.64                     | 15.48                 |
| 19159              | Ringgold, IA              | -0.28                | 24.96                     | 12.99                 |
| 19161              | Sac, IA                   | -0.142               | 37.63                     | 7.48                  |

| <b>County FIPS</b> | <b>County Description</b> | <b>DOS-SVI Index</b> | <b>DOS-SVI Percentile</b> | <b>SVI Percentile</b> |
|--------------------|---------------------------|----------------------|---------------------------|-----------------------|
| 19163              | Scott, IA                 | 0.069                | 58.87                     | 26.59                 |
| 19165              | Shelby, IA                | -0.272               | 25.6                      | 13.03                 |
| 19167              | Sioux, IA                 | -0.578               | 7.51                      | 22.07                 |
| 19169              | Story, IA                 | 0.718                | 94.05                     | 21.24                 |
| 19171              | Tama, IA                  | -0.334               | 20.5                      | 32.74                 |
| 19173              | Taylor, IA                | -0.385               | 16.4                      | 27.71                 |
| 19175              | Union, IA                 | 0.11                 | 62.66                     | 44.55                 |
| 19177              | Van Buren, IA             | -0.643               | 5.51                      | 24.65                 |
| 19179              | Wapello, IA               | 0.076                | 59.66                     | 74.39                 |
| 19181              | Warren, IA                | -0.152               | 36.77                     | 7.2                   |
| 19183              | Washington, IA            | -0.252               | 27.32                     | 22.39                 |
| 19185              | Wayne, IA                 | -0.679               | 4.71                      | 45.83                 |
| 19187              | Webster, IA               | 0.549                | 89.59                     | 45.8                  |
| 19189              | Winnebago, IA             | 0.017                | 53.49                     | 20.61                 |
| 19191              | Winneshiek, IA            | -0.022               | 49.79                     | 1.15                  |
| 19193              | Woodbury, IA              | 0.17                 | 68.86                     | 69.68                 |
| 19195              | Worth, IA                 | 0.009                | 52.59                     | 6.97                  |
| 19197              | Wright, IA                | -0.071               | 44.44                     | 48.03                 |
| 20001              | Allen, KS                 | 0.097                | 61.45                     | 39.78                 |
| 20003              | Anderson, KS              | -0.301               | 23.46                     | 22.74                 |
| 20005              | Atchison, KS              | 0.21                 | 71.54                     | 49.11                 |
| 20007              | Barber, KS                | -0.239               | 28.56                     | 28.03                 |
| 20009              | Barton, KS                | 0.149                | 66.67                     | 54.39                 |
| 20011              | Bourbon, KS               | -0.232               | 29.1                      | 58.28                 |
| 20013              | Brown, KS                 | -0.125               | 39.16                     | 27.17                 |
| 20015              | Butler, KS                | -0.221               | 30.18                     | 26.24                 |
| 20017              | Chase, KS                 | -0.386               | 16.24                     | 40.67                 |
| 20019              | Chautauqua, KS            | -0.09                | 42.41                     | 71.88                 |
| 20021              | Cherokee, KS              | 0.03                 | 54.76                     | 38.28                 |
| 20023              | Cheyenne, KS              | -0.249               | 27.6                      | 10.03                 |
| 20025              | Clark, KS                 | -0.215               | 30.66                     | 31.24                 |
| 20027              | Clay, KS                  | -0.314               | 22.57                     | 4.94                  |
| 20029              | Cloud, KS                 | 0.3                  | 78.19                     | 27.39                 |
| 20031              | Coffey, KS                | -0.157               | 36.2                      | 20.35                 |
| 20033              | Comanche, KS              | -0.425               | 13.79                     | 7.93                  |
| 20035              | Cowley, KS                | 0.273                | 76.22                     | 73.18                 |
| 20037              | Crawford, KS              | 0.076                | 59.63                     | 69.87                 |
| 20039              | Decatur, KS               | -0.036               | 47.91                     | 15.73                 |
| 20041              | Dickinson, KS             | -0.142               | 37.85                     | 33.22                 |
| 20043              | Doniphan, KS              | 0.146                | 66.44                     | 23.06                 |
| 20045              | Douglas, KS               | 0.41                 | 84.08                     | 22.32                 |
| 20047              | Edwards, KS               | -0.247               | 27.76                     | 37.2                  |
| 20049              | Elk, KS                   | -0.239               | 28.62                     | 38.95                 |
| 20051              | Ellis, KS                 | 0.088                | 60.87                     | 15.64                 |
| 20053              | Ellsworth, KS             | 0.14                 | 65.58                     | 39.52                 |
| 20055              | Finney, KS                | -0.655               | 5.13                      | 82.36                 |
| 20057              | Ford, KS                  | -0.691               | 4.36                      | 85.7                  |
| 20059              | Franklin, KS              | -0.172               | 34.61                     | 21.37                 |
| 20061              | Geary, KS                 | 0.077                | 59.73                     | 65.76                 |
| 20063              | Gove, KS                  | -0.321               | 21.9                      | 9.75                  |
| 20065              | Graham, KS                | -0.174               | 34.42                     | 12.55                 |
| 20067              | Grant, KS                 | -0.749               | 3.6                       | 38.15                 |
| 20069              | Gray, KS                  | -0.706               | 4.01                      | 27.36                 |
| 20071              | Greeley, KS               | -0.457               | 12.13                     | 57.52                 |
| 20073              | Greenwood, KS             | -0.314               | 22.51                     | 21.27                 |

| <b>County FIPS</b> | <b>County Description</b> | <b>DOS-SVI Index</b> | <b>DOS-SVI Percentile</b> | <b>SVI Percentile</b> |
|--------------------|---------------------------|----------------------|---------------------------|-----------------------|
| 20075              | Hamilton, KS              | -0.435               | 13.24                     | 25.86                 |
| 20077              | Harper, KS                | -0.062               | 45.53                     | 32.23                 |
| 20079              | Harvey, KS                | -0.115               | 40.05                     | 33.5                  |
| 20081              | Haskell, KS               | -1.146               | 0.86                      | 41.15                 |
| 20083              | Hodgeman, KS              | -0.647               | 5.38                      | 11.18                 |
| 20085              | Jackson, KS               | -0.156               | 36.42                     | 26.94                 |
| 20087              | Jefferson, KS             | -0.214               | 30.79                     | 5.48                  |
| 20089              | Jewell, KS                | -0.333               | 20.69                     | 8.76                  |
| 20091              | Johnson, KS               | -0.391               | 16.05                     | 6.15                  |
| 20093              | Kearny, KS                | 0.144                | 66.03                     | 46.56                 |
| 20095              | Kingman, KS               | -0.335               | 20.41                     | 5.13                  |
| 20097              | Kiowa, KS                 | -0.261               | 26.52                     | 25.8                  |
| 20099              | Labette, KS               | 0.105                | 62.15                     | 63.92                 |
| 20101              | Lane, KS                  | -0.332               | 20.82                     | 3.03                  |
| 20103              | Leavenworth, KS           | 0.079                | 59.92                     | 24.04                 |
| 20105              | Lincoln, KS               | -0.408               | 14.64                     | 13.22                 |
| 20107              | Linn, KS                  | -0.14                | 38.08                     | 44.78                 |
| 20109              | Logan, KS                 | -0.546               | 8.63                      | 12.96                 |
| 20111              | Lyon, KS                  | 0.124                | 63.83                     | 73.22                 |
| 20113              | McPherson, KS             | -0.034               | 48.23                     | 10.67                 |
| 20115              | Marion, KS                | -0.259               | 26.71                     | 17.71                 |
| 20117              | Marshall, KS              | -0.407               | 14.8                      | 12.64                 |
| 20119              | Meade, KS                 | -0.002               | 51.61                     | 37.17                 |
| 20121              | Miami, KS                 | -0.347               | 19.52                     | 2.58                  |
| 20123              | Mitchell, KS              | -0.24                | 28.53                     | 28.44                 |
| 20125              | Montgomery, KS            | 0.242                | 73.73                     | 80.29                 |
| 20127              | Morris, KS                | -0.146               | 37.34                     | 24.36                 |
| 20129              | Morton, KS                | -0.088               | 42.6                      | 40.8                  |
| 20131              | Nemaha, KS                | -0.382               | 16.55                     | 9.62                  |
| 20133              | Neosho, KS                | 0.184                | 69.75                     | 65.8                  |
| 20135              | Ness, KS                  | -0.51                | 9.87                      | 15                    |
| 20137              | Norton, KS                | 0.24                 | 73.48                     | 29.75                 |
| 20139              | Osage, KS                 | -0.076               | 44.03                     | 23.41                 |
| 20141              | Osborne, KS               | -0.024               | 49.51                     | 7.23                  |
| 20143              | Ottawa, KS                | -0.351               | 19.26                     | 2.71                  |
| 20145              | Pawnee, KS                | 0.657                | 92.84                     | 28.66                 |
| 20147              | Phillips, KS              | -0.44                | 12.96                     | 24.2                  |
| 20149              | Pottawatomie, KS          | -0.508               | 10                        | 14.87                 |
| 20151              | Pratt, KS                 | -0.626               | 5.99                      | 38.73                 |
| 20153              | Rawlins, KS               | -0.523               | 9.27                      | 13.6                  |
| 20155              | Reno, KS                  | -0.1                 | 41.74                     | 58.66                 |
| 20157              | Republic, KS              | -0.492               | 10.57                     | 6.05                  |
| 20159              | Rice, KS                  | 0.111                | 62.75                     | 42.52                 |
| 20161              | Riley, KS                 | 0.753                | 94.68                     | 43.73                 |
| 20163              | Rooks, KS                 | 0                    | 51.8                      | 14.2                  |
| 20165              | Rush, KS                  | -0.259               | 26.65                     | 7.83                  |
| 20167              | Russell, KS               | -0.355               | 18.82                     | 23.92                 |
| 20169              | Saline, KS                | -0.002               | 51.67                     | 41.62                 |
| 20171              | Scott, KS                 | -0.947               | 1.85                      | 30.61                 |
| 20173              | Sedgwick, KS              | 0.097                | 61.48                     | 53.57                 |
| 20175              | Seward, KS                | -0.232               | 29.07                     | 91.11                 |
| 20177              | Shawnee, KS               | -0.054               | 46.16                     | 50.99                 |
| 20179              | Sheridan, KS              | -0.299               | 23.69                     | 6.85                  |
| 20181              | Sherman, KS               | 0.244                | 73.96                     | 49.84                 |
| 20183              | Smith, KS                 | -0.11                | 40.59                     | 5.03                  |

| County FIPS | County Description | DOS-SVI Index | DOS-SVI Percentile | SVI Percentile |
|-------------|--------------------|---------------|--------------------|----------------|
| 20185       | Stafford, KS       | -0.209        | 31.07              | 27.77          |
| 20187       | Stanton, KS        | -0.197        | 32.25              | 49.65          |
| 20189       | Stevens, KS        | -0.276        | 25.44              | 67.39          |
| 20191       | Sumner, KS         | -0.102        | 41.48              | 22.23          |
| 20193       | Thomas, KS         | -0.103        | 41.23              | 7.04           |
| 20195       | Trego, KS          | 0.163         | 68.35              | 3.89           |
| 20197       | Wabaunsee, KS      | -0.581        | 7.35               | 5.32           |
| 20199       | Wallace, KS        | -0.4          | 15.31              | 14.3           |
| 20201       | Washington, KS     | -0.362        | 18.34              | 14.81          |
| 20203       | Wichita, KS        | -0.835        | 2.67               | 46.78          |
| 20205       | Wilson, KS         | -0.082        | 43.43              | 63.66          |
| 20207       | Woodson, KS        | 0.063         | 58.29              | 43.98          |
| 20209       | Wyandotte, KS      | 0.328         | 79.94              | 92.42          |
| 21001       | Adair, KY          | 0.133         | 64.66              | 71.21          |
| 21003       | Allen, KY          | 0.158         | 67.81              | 67.96          |
| 21005       | Anderson, KY       | -0.021        | 49.98              | 26.37          |
| 21007       | Ballard, KY        | 0.064         | 58.39              | 44.59          |
| 21009       | Barren, KY         | 0.33          | 80.1               | 77.61          |
| 21011       | Bath, KY           | 0.343         | 80.87              | 72.9           |
| 21013       | Bell, KY           | 1.023         | 97.39              | 89.27          |
| 21015       | Boone, KY          | -0.094        | 42.22              | 12.77          |
| 21017       | Bourbon, KY        | 0.114         | 63.07              | 55.61          |
| 21019       | Boyd, KY           | 0.551         | 89.72              | 69.08          |
| 21021       | Boyle, KY          | 0.362         | 81.95              | 43.15          |
| 21023       | Bracken, KY        | -0.199        | 31.9               | 38.66          |
| 21025       | Breathitt, KY      | 0.634         | 92.1               | 82.2           |
| 21027       | Breckinridge, KY   | -0.328        | 21.23              | 73.76          |
| 21029       | Bullitt, KY        | -0.044        | 47.02              | 13.85          |
| 21031       | Butler, KY         | 0.137         | 65.08              | 79.2           |
| 21033       | Caldwell, KY       | -0.204        | 31.39              | 49.81          |
| 21035       | Calloway, KY       | 0.576         | 90.54              | 49.97          |
| 21037       | Campbell, KY       | 0.174         | 69.12              | 21.88          |
| 21039       | Carlisle, KY       | -0.083        | 43.3               | 33.95          |
| 21041       | Carroll, KY        | -0.086        | 42.76              | 89.04          |
| 21043       | Carter, KY         | 0.453         | 85.7               | 82.04          |
| 21045       | Casey, KY          | 0.284         | 77.17              | 76.56          |
| 21047       | Christian, KY      | 0.634         | 92.07              | 91.27          |
| 21049       | Clark, KY          | 0.151         | 67.11              | 60.61          |
| 21051       | Clay, KY           | 0.844         | 95.89              | 90.99          |
| 21053       | Clinton, KY        | 0.161         | 68.1               | 77.8           |
| 21055       | Crittenden, KY     | -0.019        | 50.27              | 48.44          |
| 21057       | Cumberland, KY     | 0.078         | 59.79              | 53.15          |
| 21059       | Daviess, KY        | 0.119         | 63.36              | 61.69          |
| 21061       | Edmonson, KY       | 0.08          | 60.05              | 63.57          |
| 21063       | Elliott, KY        | 1.442         | 99.39              | 72.39          |
| 21065       | Estill, KY         | 0.701         | 93.86              | 79.97          |
| 21067       | Fayette, KY        | 0.404         | 83.89              | 48.76          |
| 21069       | Fleming, KY        | -0.045        | 46.96              | 77.1           |
| 21071       | Floyd, KY          | 0.643         | 92.42              | 85.03          |
| 21073       | Franklin, KY       | 0.151         | 67.08              | 54.68          |
| 21075       | Fulton, KY         | 1.336         | 99.05              | 87.04          |
| 21077       | Gallatin, KY       | -0.037        | 47.85              | 61.24          |
| 21079       | Garrard, KY        | 0.03          | 54.89              | 42.99          |
| 21081       | Grant, KY          | -0.04         | 47.66              | 56.02          |
| 21083       | Graves, KY         | -0.086        | 42.79              | 77.52          |

| <b>County FIPS</b> | <b>County Description</b> | <b>DOS-SVI Index</b> | <b>DOS-SVI Percentile</b> | <b>SVI Percentile</b> |
|--------------------|---------------------------|----------------------|---------------------------|-----------------------|
| 21085              | Grayson, KY               | 0.208                | 71.38                     | 60.96                 |
| 21087              | Green, KY                 | 0.138                | 65.2                      | 52.26                 |
| 21089              | Greenup, KY               | 0.06                 | 58.04                     | 32.17                 |
| 21091              | Hancock, KY               | 0.013                | 53.01                     | 38.22                 |
| 21093              | Hardin, KY                | 0.203                | 71.06                     | 56.72                 |
| 21095              | Harlan, KY                | 0.835                | 95.7                      | 88.03                 |
| 21097              | Harrison, KY              | 0.03                 | 54.85                     | 50.57                 |
| 21099              | Hart, KY                  | 0.154                | 67.43                     | 76.59                 |
| 21101              | Henderson, KY             | 0.517                | 88.35                     | 70.89                 |
| 21103              | Henry, KY                 | 0.137                | 65.14                     | 52.74                 |
| 21105              | Hickman, KY               | -0.014               | 50.65                     | 57.39                 |
| 21107              | Hopkins, KY               | 0.279                | 76.73                     | 55.41                 |
| 21109              | Jackson, KY               | 0.738                | 94.4                      | 66.62                 |
| 21111              | Jefferson, KY             | 0.196                | 70.68                     | 56.82                 |
| 21113              | Jessamine, KY             | 0.307                | 78.7                      | 52.01                 |
| 21115              | Johnson, KY               | 0.201                | 70.9                      | 81.02                 |
| 21117              | Kenton, KY                | 0.093                | 61.25                     | 33.79                 |
| 21119              | Knott, KY                 | 0.273                | 76.15                     | 85.48                 |
| 21121              | Knox, KY                  | 0.716                | 94.02                     | 83.25                 |
| 21123              | Larue, KY                 | 0.383                | 82.9                      | 53.18                 |
| 21125              | Laurel, KY                | 0.274                | 76.28                     | 75.22                 |
| 21127              | Lawrence, KY              | 0.006                | 52.4                      | 75.83                 |
| 21129              | Lee, KY                   | 1.178                | 98.53                     | 81.82                 |
| 21131              | Leslie, KY                | 0.357                | 81.73                     | 77.45                 |
| 21133              | Letcher, KY               | 0.66                 | 92.93                     | 87.55                 |
| 21135              | Lewis, KY                 | 0.534                | 89.02                     | 62.42                 |
| 21137              | Lincoln, KY               | 0.066                | 58.58                     | 70.83                 |
| 21139              | Livingston, KY            | -0.36                | 18.59                     | 26.4                  |
| 21141              | Logan, KY                 | 0.132                | 64.53                     | 52.87                 |
| 21143              | Lyon, KY                  | 0.065                | 58.52                     | 32.52                 |
| 21145              | McCracken, KY             | 0.079                | 59.88                     | 41.53                 |
| 21147              | McCreary, KY              | 0.947                | 96.85                     | 87.8                  |
| 21149              | McLean, KY                | -0.07                | 44.57                     | 42.17                 |
| 21151              | Madison, KY               | 0.594                | 90.99                     | 49.68                 |
| 21153              | Magoffin, KY              | 0.141                | 65.62                     | 80.57                 |
| 21155              | Marion, KY                | 0.377                | 82.62                     | 90.57                 |
| 21157              | Marshall, KY              | -0.308               | 22.95                     | 27.23                 |
| 21159              | Martin, KY                | 0.701                | 93.82                     | 84.94                 |
| 21161              | Mason, KY                 | 0.16                 | 67.97                     | 66.82                 |
| 21163              | Meade, KY                 | -0.416               | 14.33                     | 31.78                 |
| 21165              | Menifee, KY               | 0.155                | 67.46                     | 58.47                 |
| 21167              | Mercer, KY                | 0.006                | 52.37                     | 41.34                 |
| 21169              | Metcalfe, KY              | 0.423                | 84.59                     | 68.12                 |
| 21171              | Monroe, KY                | 0.186                | 70.14                     | 69.75                 |
| 21173              | Montgomery, KY            | 0.336                | 80.48                     | 79.87                 |
| 21175              | Morgan, KY                | 0.91                 | 96.66                     | 82.93                 |
| 21177              | Muhlenberg, KY            | 0.241                | 73.7                      | 61.34                 |
| 21179              | Nelson, KY                | -0.193               | 32.6                      | 28.95                 |
| 21181              | Nicholas, KY              | 0.055                | 57.56                     | 81.97                 |
| 21183              | Ohio, KY                  | 0.164                | 68.39                     | 57.99                 |
| 21185              | Oldham, KY                | -0.364               | 18.15                     | 3.95                  |
| 21187              | Owen, KY                  | -0.362               | 18.31                     | 52.64                 |
| 21189              | Owsley, KY                | 1.079                | 97.83                     | 84.14                 |
| 21191              | Pendleton, KY             | 0.198                | 70.77                     | 41.5                  |
| 21193              | Perry, KY                 | 0.564                | 90.16                     | 90.51                 |



| County FIPS | County Description   | DOS-SVI Index | DOS-SVI Percentile | SVI Percentile |
|-------------|----------------------|---------------|--------------------|----------------|
| 21195       | Pike, KY             | 0.51          | 88.22              | 79.08          |
| 21197       | Powell, KY           | 0.121         | 63.45              | 77.32          |
| 21199       | Pulaski, KY          | 0.444         | 85.42              | 74.2           |
| 21201       | Robertson, KY        | 0.464         | 86.37              | 35.38          |
| 21203       | Rockcastle, KY       | 0.495         | 87.74              | 78.82          |
| 21205       | Rowan, KY            | 0.801         | 95.32              | 75.57          |
| 21207       | Russell, KY          | 0.079         | 59.95              | 86.34          |
| 21209       | Scott, KY            | -0.094        | 42.15              | 33.31          |
| 21211       | Shelby, KY           | -0.289        | 24.26              | 42.61          |
| 21213       | Simpson, KY          | 0.143         | 66                 | 28.79          |
| 21215       | Spencer, KY          | -0.142        | 37.82              | 3.69           |
| 21217       | Taylor, KY           | 0.855         | 96.02              | 72.1           |
| 21219       | Todd, KY             | -0.292        | 24                 | 80.92          |
| 21221       | Trigg, KY            | -0.304        | 23.3               | 36.5           |
| 21223       | Trimble, KY          | -0.042        | 47.37              | 71.43          |
| 21225       | Union, KY            | 0.728         | 94.27              | 53.66          |
| 21227       | Warren, KY           | 0.281         | 76.82              | 70.96          |
| 21229       | Washington, KY       | -0.067        | 44.99              | 51.27          |
| 21231       | Wayne, KY            | 0.049         | 57.05              | 74.78          |
| 21233       | Webster, KY          | 0.173         | 69.09              | 78.54          |
| 21235       | Whitley, KY          | 0.373         | 82.36              | 83.79          |
| 21237       | Wolfe, KY            | 1.154         | 98.41              | 86.21          |
| 21239       | Woodford, KY         | 0.05          | 57.18              | 20.41          |
| 22001       | Acadia, LA           | 0.301         | 78.29              | 91.82          |
| 22003       | Allen, LA            | 0.37          | 82.27              | 92.61          |
| 22005       | Ascension, LA        | -0.096        | 42.02              | 39.68          |
| 22007       | Assumption, LA       | 0.278         | 76.57              | 77.9           |
| 22009       | Avoyelles, LA        | 0.605         | 91.37              | 96.34          |
| 22011       | Beauregard, LA       | 0.048         | 56.86              | 65.19          |
| 22013       | Bienville, LA        | 0.469         | 86.63              | 94.01          |
| 22015       | Bossier, LA          | 0.21          | 71.6               | 58.76          |
| 22017       | Caddo, LA            | 0.652         | 92.68              | 83.85          |
| 22019       | Calcasieu, LA        | 0.223         | 72.72              | 73.92          |
| 22021       | Caldwell, LA         | -0.018        | 50.4               | 93.31          |
| 22023       | Cameron, LA          | -0.679        | 4.68               | 26.43          |
| 22025       | Catahoula, LA        | 0.661         | 92.96              | 78.06          |
| 22027       | Claiborne, LA        | 1.244         | 98.79              | 94.78          |
| 22029       | Concordia, LA        | 0.561         | 90.07              | 91.34          |
| 22031       | De Soto, LA          | 0.46          | 86.06              | 89.17          |
| 22033       | East Baton Rouge, LA | 0.453         | 85.64              | 66.53          |
| 22035       | East Carroll, LA     | 2.034         | 99.94              | 93.57          |
| 22037       | East Feliciana, LA   | 0.637         | 92.23              | 81.85          |
| 22039       | Evangeline, LA       | 0.748         | 94.56              | 99.75          |
| 22041       | Franklin, LA         | 0.701         | 93.79              | 95.19          |
| 22043       | Grant, LA            | 0.5           | 87.9               | 62.74          |
| 22045       | Iberia, LA           | 0.334         | 80.23              | 96.05          |
| 22047       | Iberville, LA        | 0.624         | 91.82              | 88.6           |
| 22049       | Jackson, LA          | 0.85          | 95.92              | 93.82          |
| 22051       | Jefferson, LA        | 0.26          | 75.2               | 61.21          |
| 22053       | Jefferson Davis, LA  | 0.201         | 70.93              | 81.05          |
| 22055       | Lafayette, LA        | 0.219         | 72.43              | 62.17          |
| 22057       | Lafourche, LA        | 0.186         | 70.2               | 76.69          |
| 22059       | LaSalle, LA          | 0.571         | 90.35              | 76.34          |
| 22061       | Lincoln, LA          | 0.944         | 96.82              | 84.78          |
| 22063       | Livingston, LA       | -0.189        | 33.05              | 43.09          |

| County FIPS | County Description       | DOS-SVI Index | DOS-SVI Percentile | SVI Percentile |
|-------------|--------------------------|---------------|--------------------|----------------|
| 22065       | Madison, LA              | 1.46          | 99.46              | 96.97          |
| 22067       | Morehouse, LA            | 0.495         | 87.81              | 88.47          |
| 22069       | Natchitoches, LA         | 0.82          | 95.64              | 85.73          |
| 22071       | Orleans, LA              | 0.741         | 94.46              | 74.49          |
| 22073       | Ouachita, LA             | 0.576         | 90.48              | 85.22          |
| 22075       | Plaquemines, LA          | 0.391         | 83.41              | 70.61          |
| 22077       | Pointe Coupee, LA        | -0.207        | 31.17              | 84.75          |
| 22079       | Rapides, LA              | 0.503         | 88.03              | 90.86          |
| 22081       | Red River, LA            | 0.13          | 64.25              | 81.37          |
| 22083       | Richland, LA             | 0.731         | 94.3               | 85.54          |
| 22085       | Sabine, LA               | -0.011        | 50.94              | 83.15          |
| 22087       | St. Bernard, LA          | 0.54          | 89.24              | 77.13          |
| 22089       | St. Charles, LA          | 0.046         | 56.64              | 35.29          |
| 22091       | St. Helena, LA           | 0.364         | 82.04              | 90             |
| 22093       | St. James, LA            | -0.085        | 43.04              | 62.99          |
| 22095       | St. John the Baptist, LA | 0.453         | 85.67              | 74.68          |
| 22097       | St. Landry, LA           | 0.487         | 87.33              | 92.2           |
| 22099       | St. Martin, LA           | 0.037         | 55.78              | 78.31          |
| 22101       | St. Mary, LA             | 0.217         | 72.27              | 91.62          |
| 22103       | St. Tammany, LA          | -0.108        | 40.78              | 31.05          |
| 22105       | Tangipahoa, LA           | 0.474         | 86.92              | 88.85          |
| 22107       | Tensas, LA               | 0.585         | 90.8               | 83.66          |
| 22109       | Terrebonne, LA           | 0.265         | 75.52              | 89.52          |
| 22111       | Union, LA                | -0.197        | 32.19              | 80.8           |
| 22113       | Vermilion, LA            | -0.229        | 29.35              | 82.01          |
| 22115       | Vernon, LA               | 0.309         | 78.8               | 74.33          |
| 22117       | Washington, LA           | 0.608         | 91.44              | 99.62          |
| 22119       | Webster, LA              | 0.542         | 89.3               | 87.9           |
| 22121       | West Baton Rouge, LA     | 0.342         | 80.8               | 76.11          |
| 22123       | West Carroll, LA         | 0.543         | 89.33              | 66.85          |
| 22125       | West Feliciana, LA       | 1.125         | 98.19              | 69.01          |
| 22127       | Winn, LA                 | 0.905         | 96.56              | 77.55          |
| 23001       | Androscoggin, ME         | 0.137         | 65.04              | 55.67          |
| 23003       | Aroostook, ME            | 0.185         | 70.11              | 59.46          |
| 23005       | Cumberland, ME           | -0.198        | 32.09              | 13.63          |
| 23007       | Franklin, ME             | -0.021        | 50.02              | 21.5           |
| 23009       | Hancock, ME              | -0.28         | 25.02              | 19.3           |
| 23011       | Kennebec, ME             | -0.008        | 51.16              | 37.87          |
| 23013       | Knox, ME                 | -0.148        | 37.03              | 14.75          |
| 23015       | Lincoln, ME              | -0.109        | 40.69              | 11.43          |
| 23017       | Oxford, ME               | 0.147         | 66.51              | 37.26          |
| 23019       | Penobscot, ME            | 0.248         | 74.34              | 45.32          |
| 23021       | Piscataquis, ME          | 0.33          | 80.04              | 48.98          |
| 23023       | Sagadahoc, ME            | -0.196        | 32.38              | 5.22           |
| 23025       | Somerset, ME             | 0.106         | 62.24              | 62.2           |
| 23027       | Waldo, ME                | -0.115        | 40.02              | 21.97          |
| 23029       | Washington, ME           | 0.319         | 79.37              | 64.39          |
| 23031       | York, ME                 | -0.262        | 26.46              | 9.36           |
| 24001       | Allegany, MD             | 0.521         | 88.44              | 62.1           |
| 24003       | Anne Arundel, MD         | -0.2          | 31.74              | 17.83          |
| 24005       | Baltimore, MD            | 0.139         | 65.42              | 38.18          |
| 24009       | Calvert, MD              | -0.243        | 28.11              | 4.71           |
| 24011       | Caroline, MD             | 0.144         | 66.12              | 55.35          |
| 24013       | Carroll, MD              | -0.394        | 15.7               | 4.04           |
| 24015       | Cecil, MD                | -0.22         | 30.25              | 29.33          |

| <b>County FIPS</b> | <b>County Description</b> | <b>DOS-SVI Index</b> | <b>DOS-SVI Percentile</b> | <b>SVI Percentile</b> |
|--------------------|---------------------------|----------------------|---------------------------|-----------------------|
| 24017              | Charles, MD               | 0.047                | 56.77                     | 17.23                 |
| 24019              | Dorchester, MD            | 0.39                 | 83.35                     | 75.06                 |
| 24021              | Frederick, MD             | -0.174               | 34.38                     | 15.89                 |
| 24023              | Garrett, MD               | -0.107               | 40.81                     | 18.12                 |
| 24025              | Harford, MD               | -0.2                 | 31.77                     | 9.33                  |
| 24027              | Howard, MD                | -0.414               | 14.39                     | 13.06                 |
| 24029              | Kent, MD                  | 0.207                | 71.25                     | 42.77                 |
| 24031              | Montgomery, MD            | -0.385               | 16.36                     | 32.55                 |
| 24033              | Prince George's, MD       | 0.131                | 64.34                     | 62.61                 |
| 24035              | Queen Anne's, MD          | -0.559               | 7.99                      | 2.2                   |
| 24037              | St. Mary's, MD            | -0.077               | 43.84                     | 20.86                 |
| 24039              | Somerset, MD              | 1.579                | 99.55                     | 89.78                 |
| 24041              | Talbot, MD                | -0.298               | 23.85                     | 13.31                 |
| 24043              | Washington, MD            | 0.256                | 75.01                     | 61.4                  |
| 24045              | Wicomico, MD              | 0.196                | 70.65                     | 77.39                 |
| 24047              | Worcester, MD             | 0.211                | 71.7                      | 28.03                 |
| 24510              | Baltimore City, MD        | 0.671                | 93.16                     | 83.12                 |
| 25001              | Barnstable, MA            | -0.552               | 8.37                      | 5.64                  |
| 25003              | Berkshire, MA             | 0.167                | 68.64                     | 40.83                 |
| 25005              | Bristol, MA               | 0.118                | 63.23                     | 52.48                 |
| 25007              | Dukes, MA                 | -0.481               | 11.02                     | 0.96                  |
| 25009              | Essex, MA                 | -0.166               | 35.24                     | 50.8                  |
| 25011              | Franklin, MA              | -0.074               | 44.25                     | 20.96                 |
| 25013              | Hampden, MA               | 0.426                | 84.69                     | 82.32                 |
| 25015              | Hampshire, MA             | 0.494                | 87.71                     | 23.25                 |
| 25017              | Middlesex, MA             | -0.324               | 21.59                     | 22.64                 |
| 25019              | Nantucket, MA             | -0.33                | 20.98                     | 2.68                  |
| 25021              | Norfolk, MA               | -0.445               | 12.83                     | 20.92                 |
| 25023              | Plymouth, MA              | -0.223               | 29.99                     | 23.03                 |
| 25025              | Suffolk, MA               | 0.256                | 74.88                     | 73.79                 |
| 25027              | Worcester, MA             | -0.093               | 42.28                     | 40.96                 |
| 26001              | Alcona, MI                | -0.126               | 38.97                     | 25.57                 |
| 26003              | Alger, MI                 | 0.19                 | 70.3                      | 44.81                 |
| 26005              | Allegan, MI               | -0.365               | 18.08                     | 17.58                 |
| 26007              | Alpena, MI                | 0.175                | 69.15                     | 34.08                 |
| 26009              | Antrim, MI                | -0.328               | 21.2                      | 11.56                 |
| 26011              | Arenac, MI                | 0.157                | 67.59                     | 50.54                 |
| 26013              | Baraga, MI                | 0.534                | 89.08                     | 65.99                 |
| 26015              | Barry, MI                 | -0.314               | 22.6                      | 8.69                  |
| 26017              | Bay, MI                   | 0.354                | 81.44                     | 44.04                 |
| 26019              | Benzie, MI                | -0.256               | 26.97                     | 10.51                 |
| 26021              | Berrien, MI               | 0.126                | 64.06                     | 64.75                 |
| 26023              | Branch, MI                | 0.139                | 65.33                     | 63.15                 |
| 26025              | Calhoun, MI               | 0.489                | 87.46                     | 72.42                 |
| 26027              | Cass, MI                  | -0.16                | 35.69                     | 32.8                  |
| 26029              | Charlevoix, MI            | -0.187               | 33.24                     | 9.68                  |
| 26031              | Cheboygan, MI             | -0.011               | 50.88                     | 28.6                  |
| 26033              | Chippewa, MI              | 0.801                | 95.35                     | 72.45                 |
| 26035              | Clare, MI                 | 0.11                 | 62.59                     | 77.2                  |
| 26037              | Clinton, MI               | -0.191               | 32.76                     | 4.01                  |
| 26039              | Crawford, MI              | 0.036                | 55.65                     | 36.97                 |
| 26041              | Delta, MI                 | 0.044                | 56.29                     | 35.45                 |
| 26043              | Dickinson, MI             | -0.056               | 45.94                     | 22.96                 |
| 26045              | Eaton, MI                 | 0.029                | 54.66                     | 31.31                 |
| 26047              | Emmet, MI                 | -0.155               | 36.48                     | 13.57                 |

| <b>County FIPS</b> | <b>County Description</b> | <b>DOS-SVI Index</b> | <b>DOS-SVI Percentile</b> | <b>SVI Percentile</b> |
|--------------------|---------------------------|----------------------|---------------------------|-----------------------|
| 26049              | Genesee, MI               | 0.557                | 89.91                     | 66.24                 |
| 26051              | Gladwin, MI               | -0.116               | 39.92                     | 53.98                 |
| 26053              | Gogebic, MI               | 0.44                 | 85.29                     | 40.38                 |
| 26055              | Grand Traverse, MI        | -0.175               | 34.32                     | 18.03                 |
| 26057              | Gratiot, MI               | 0.878                | 96.4                      | 60.35                 |
| 26059              | Hillsdale, MI             | -0.043               | 47.31                     | 50.19                 |
| 26061              | Houghton, MI              | 0.053                | 57.47                     | 49.62                 |
| 26063              | Huron, MI                 | -0.141               | 38.01                     | 27.45                 |
| 26065              | Ingham, MI                | 0.62                 | 91.69                     | 57.42                 |
| 26067              | Ionia, MI                 | 0.154                | 67.33                     | 47.8                  |
| 26069              | Iosco, MI                 | 0.043                | 56.22                     | 44.94                 |
| 26071              | Iron, MI                  | 0.036                | 55.56                     | 28.25                 |
| 26073              | Isabella, MI              | 0.986                | 97.1                      | 60.16                 |
| 26075              | Jackson, MI               | 0.392                | 83.44                     | 55.06                 |
| 26077              | Kalamazoo, MI             | 0.365                | 82.11                     | 40.7                  |
| 26079              | Kalkaska, MI              | 0.003                | 52.05                     | 50.83                 |
| 26081              | Kent, MI                  | 0.026                | 54.35                     | 47.61                 |
| 26083              | Keweenaw, MI              | -0.354               | 18.88                     | 7.87                  |
| 26085              | Lake, MI                  | 0.209                | 71.47                     | 78.18                 |
| 26087              | Lapeer, MI                | -0.176               | 34.26                     | 23.82                 |
| 26089              | Leelanau, MI              | -0.596               | 6.81                      | 2.45                  |
| 26091              | Lenawee, MI               | 0.218                | 72.36                     | 40.76                 |
| 26093              | Livingston, MI            | -0.476               | 11.4                      | 0.67                  |
| 26095              | Luce, MI                  | 0.638                | 92.26                     | 53.38                 |
| 26097              | Mackinac, MI              | -0.035               | 48.14                     | 64.52                 |
| 26099              | Macomb, MI                | -0.057               | 45.88                     | 32.96                 |
| 26101              | Manistee, MI              | -0.005               | 51.35                     | 39.97                 |
| 26103              | Marquette, MI             | 0.306                | 78.61                     | 30.57                 |
| 26105              | Mason, MI                 | 0.033                | 55.11                     | 33.76                 |
| 26107              | Mecosta, MI               | 0.368                | 82.17                     | 59.75                 |
| 26109              | Menominee, MI             | -0.033               | 48.39                     | 27.64                 |
| 26111              | Midland, MI               | -0.16                | 35.72                     | 16.18                 |
| 26113              | Missaukee, MI             | -0.277               | 25.41                     | 47.55                 |
| 26115              | Monroe, MI                | -0.091               | 42.34                     | 14.94                 |
| 26117              | Montcalm, MI              | 0.267                | 75.64                     | 61.27                 |
| 26119              | Montmorency, MI           | -0.021               | 49.89                     | 37.29                 |
| 26121              | Muskegon, MI              | 0.431                | 84.91                     | 70.35                 |
| 26123              | Newaygo, MI               | -0.063               | 45.34                     | 63.18                 |
| 26125              | Oakland, MI               | -0.246               | 27.89                     | 11.4                  |
| 26127              | Oceana, MI                | -0.286               | 24.45                     | 85.8                  |
| 26129              | Ogemaw, MI                | 0.004                | 52.12                     | 62.58                 |
| 26131              | Ontonagon, MI             | -0.278               | 25.25                     | 27.32                 |
| 26133              | Osceola, MI               | 0.068                | 58.77                     | 74.01                 |
| 26135              | Oscoda, MI                | -0.071               | 44.51                     | 66.94                 |
| 26137              | Otsego, MI                | -0.043               | 47.25                     | 36.94                 |
| 26139              | Ottawa, MI                | -0.269               | 25.91                     | 21.72                 |
| 26141              | Presque Isle, MI          | -0.19                | 32.95                     | 27.61                 |
| 26143              | Roscommon, MI             | 0.139                | 65.46                     | 46.27                 |
| 26145              | Saginaw, MI               | 0.454                | 85.74                     | 70.48                 |
| 26147              | St. Clair, MI             | 0.075                | 59.5                      | 27.9                  |
| 26149              | St. Joseph, MI            | -0.032               | 48.55                     | 65.16                 |
| 26151              | Sanilac, MI               | 0.004                | 52.21                     | 48.34                 |
| 26153              | Schoolcraft, MI           | 0.37                 | 82.3                      | 54.52                 |
| 26155              | Shiawassee, MI            | 0.055                | 57.66                     | 13.25                 |
| 26157              | Tuscola, MI               | -0.079               | 43.62                     | 39.59                 |

| <b>County FIPS</b> | <b>County Description</b> | <b>DOS-SVI Index</b> | <b>DOS-SVI Percentile</b> | <b>SVI Percentile</b> |
|--------------------|---------------------------|----------------------|---------------------------|-----------------------|
| 26159              | Van Buren, MI             | -0.141               | 37.95                     | 65.89                 |
| 26161              | Washtenaw, MI             | 0.104                | 62.08                     | 22.36                 |
| 26163              | Wayne, MI                 | 0.587                | 90.83                     | 87.23                 |
| 26165              | Wexford, MI               | 0.136                | 64.88                     | 50.35                 |
| 27001              | Aitkin, MN                | -0.28                | 24.99                     | 30.83                 |
| 27003              | Anoka, MN                 | -0.249               | 27.64                     | 14.04                 |
| 27005              | Becker, MN                | -0.214               | 30.85                     | 29.9                  |
| 27007              | Beltrami, MN              | 0.442                | 85.36                     | 77.71                 |
| 27009              | Benton, MN                | 0.184                | 69.95                     | 43.18                 |
| 27011              | Big Stone, MN             | -0.235               | 28.88                     | 20.06                 |
| 27013              | Blue Earth, MN            | 0.512                | 88.25                     | 28.38                 |
| 27015              | Brown, MN                 | -0.041               | 47.56                     | 12.74                 |
| 27017              | Carlton, MN               | 0.051                | 57.31                     | 26.66                 |
| 27019              | Carver, MN                | -0.571               | 7.67                      | 1.24                  |
| 27021              | Cass, MN                  | -0.241               | 28.43                     | 35                    |
| 27023              | Chippewa, MN              | -0.143               | 37.6                      | 35.22                 |
| 27025              | Chisago, MN               | -0.201               | 31.68                     | 5.92                  |
| 27027              | Clay, MN                  | 0.219                | 72.49                     | 22.17                 |
| 27029              | Clearwater, MN            | -0.194               | 32.51                     | 79.17                 |
| 27031              | Cook, MN                  | -1.002               | 1.66                      | 20.29                 |
| 27033              | Cottonwood, MN            | -0.391               | 15.95                     | 47.26                 |
| 27035              | Crow Wing, MN             | -0.098               | 41.87                     | 12.23                 |
| 27037              | Dakota, MN                | -0.127               | 38.91                     | 12.07                 |
| 27039              | Dodge, MN                 | -0.186               | 33.27                     | 5.73                  |
| 27041              | Douglas, MN               | -0.251               | 27.44                     | 4.46                  |
| 27043              | Faribault, MN             | -0.087               | 42.63                     | 15.7                  |
| 27045              | Fillmore, MN              | -0.451               | 12.58                     | 21.69                 |
| 27047              | Freeborn, MN              | 0.126                | 64.12                     | 43.28                 |
| 27049              | Goodhue, MN               | -0.207               | 31.23                     | 17.07                 |
| 27051              | Grant, MN                 | -0.186               | 33.37                     | 9.46                  |
| 27053              | Hennepin, MN              | -0.101               | 41.64                     | 30.92                 |
| 27055              | Houston, MN               | -0.305               | 23.21                     | 1.85                  |
| 27057              | Hubbard, MN               | -0.495               | 10.47                     | 20.51                 |
| 27059              | Isanti, MN                | -0.112               | 40.4                      | 10.22                 |
| 27061              | Itasca, MN                | -0.278               | 25.21                     | 32.93                 |
| 27063              | Jackson, MN               | -0.386               | 16.33                     | 3.06                  |
| 27065              | Kanabec, MN               | -0.2                 | 31.87                     | 28.41                 |
| 27067              | Kandiyohi, MN             | -0.214               | 30.82                     | 40.64                 |
| 27069              | Kittson, MN               | -0.216               | 30.5                      | 9.97                  |
| 27071              | Koochiching, MN           | 0.238                | 73.35                     | 43.66                 |
| 27073              | Lac qui Parle, MN         | -0.299               | 23.59                     | 10.06                 |
| 27075              | Lake, MN                  | -0.37                | 17.73                     | 11.02                 |
| 27077              | Lake of the Woods, MN     | -0.319               | 22.06                     | 15.76                 |
| 27079              | Le Sueur, MN              | -0.341               | 19.93                     | 11.46                 |
| 27081              | Lincoln, MN               | -0.286               | 24.61                     | 6.66                  |
| 27083              | Lyon, MN                  | 0.033                | 55.17                     | 45.32                 |
| 27085              | McLeod, MN                | -0.054               | 46.1                      | 12.61                 |
| 27087              | Mahnomen, MN              | 0.284                | 77.14                     | 87.17                 |
| 27089              | Marshall, MN              | -0.359               | 18.62                     | 14.11                 |
| 27091              | Martin, MN                | 0.063                | 58.23                     | 19.33                 |
| 27093              | Meeker, MN                | -0.517               | 9.55                      | 18.69                 |
| 27095              | Mille Lacs, MN            | 0.098                | 61.57                     | 59.17                 |
| 27097              | Morrison, MN              | -0.166               | 35.12                     | 26.82                 |
| 27099              | Mower, MN                 | -0.277               | 25.37                     | 62.83                 |
| 27101              | Murray, MN                | -0.433               | 13.34                     | 10.64                 |

| <b>County FIPS</b> | <b>County Description</b> | <b>DOS-SVI Index</b> | <b>DOS-SVI Percentile</b> | <b>SVI Percentile</b> |
|--------------------|---------------------------|----------------------|---------------------------|-----------------------|
| 27103              | Nicollet, MN              | 0.356                | 81.66                     | 25.13                 |
| 27105              | Nobles, MN                | -0.145               | 37.47                     | 81.5                  |
| 27107              | Norman, MN                | -0.473               | 11.49                     | 32.48                 |
| 27109              | Olmsted, MN               | -0.321               | 21.87                     | 25.99                 |
| 27111              | Otter Tail, MN            | -0.411               | 14.52                     | 20.99                 |
| 27113              | Pennington, MN            | 0.047                | 56.73                     | 30.16                 |
| 27115              | Pine, MN                  | 0.062                | 58.2                      | 46.31                 |
| 27117              | Pipestone, MN             | -0.426               | 13.75                     | 46.46                 |
| 27119              | Polk, MN                  | 0.036                | 55.62                     | 36.69                 |
| 27121              | Pope, MN                  | -0.449               | 12.64                     | 3.15                  |
| 27123              | Ramsey, MN                | 0.035                | 55.46                     | 63.34                 |
| 27125              | Red Lake, MN              | -0.46                | 11.94                     | 15.25                 |
| 27127              | Redwood, MN               | -0.025               | 49.32                     | 22.93                 |
| 27129              | Renville, MN              | -0.194               | 32.47                     | 19.68                 |
| 27131              | Rice, MN                  | 0.209                | 71.44                     | 39.3                  |
| 27133              | Rock, MN                  | -0.347               | 19.55                     | 15.32                 |
| 27135              | Roseau, MN                | -0.25                | 27.51                     | 24.78                 |
| 27137              | St. Louis, MN             | 0.132                | 64.5                      | 31.18                 |
| 27139              | Scott, MN                 | -0.662               | 4.97                      | 11.08                 |
| 27141              | Sherburne, MN             | -0.191               | 32.73                     | 8.85                  |
| 27143              | Sibley, MN                | -0.416               | 14.26                     | 13.15                 |
| 27145              | Stearns, MN               | 0.091                | 61.13                     | 38.85                 |
| 27147              | Steele, MN                | -0.262               | 26.43                     | 30.13                 |
| 27149              | Stevens, MN               | -0.172               | 34.64                     | 22.58                 |
| 27151              | Swift, MN                 | -0.012               | 50.75                     | 32.13                 |
| 27153              | Todd, MN                  | -0.583               | 7.29                      | 48.12                 |
| 27155              | Traverse, MN              | -0.126               | 39                        | 26.02                 |
| 27157              | Wabasha, MN               | -0.374               | 17.26                     | 5.89                  |
| 27159              | Wadena, MN                | 0.09                 | 61.06                     | 65.54                 |
| 27161              | Waseca, MN                | 0.052                | 57.37                     | 25.03                 |
| 27163              | Washington, MN            | -0.378               | 16.97                     | 6.82                  |
| 27165              | Watonwan, MN              | -0.185               | 33.49                     | 51.91                 |
| 27167              | Wilkin, MN                | -0.106               | 41.01                     | 19.24                 |
| 27169              | Winona, MN                | 0.215                | 72.08                     | 21.15                 |
| 27171              | Wright, MN                | -0.509               | 9.93                      | 4.62                  |
| 27173              | Yellow Medicine, MN       | 0.099                | 61.83                     | 33.44                 |
| 28001              | Adams, MS                 | 1.198                | 98.63                     | 99.14                 |
| 28003              | Alcorn, MS                | 0.149                | 66.76                     | 69.55                 |
| 28005              | Amite, MS                 | 0.34                 | 80.71                     | 81.91                 |
| 28007              | Attala, MS                | 0.283                | 76.98                     | 98.44                 |
| 28009              | Benton, MS                | 0.354                | 81.41                     | 66.05                 |
| 28011              | Bolivar, MS               | 1.453                | 99.43                     | 96.75                 |
| 28013              | Calhoun, MS               | 0.418                | 84.3                      | 96.5                  |
| 28015              | Carroll, MS               | -0.387               | 16.2                      | 63.03                 |
| 28017              | Chickasaw, MS             | 0.605                | 91.34                     | 91.43                 |
| 28019              | Choctaw, MS               | 0.083                | 60.4                      | 85.41                 |
| 28021              | Claiborne, MS             | 1.314                | 98.98                     | 99.2                  |
| 28023              | Clarke, MS                | 0.439                | 85.16                     | 66.69                 |
| 28025              | Clay, MS                  | 0.874                | 96.34                     | 70.54                 |
| 28027              | Coahoma, MS               | 1.297                | 98.85                     | 93.22                 |
| 28029              | Copiah, MS                | 0.349                | 81.28                     | 94.11                 |
| 28031              | Covington, MS             | 0.452                | 85.61                     | 78.79                 |
| 28033              | DeSoto, MS                | -0.133               | 38.43                     | 30.32                 |
| 28035              | Forrest, MS               | 0.985                | 97.07                     | 93.66                 |
| 28037              | Franklin, MS              | 0.178                | 69.5                      | 57.17                 |

| <b>County FIPS</b> | <b>County Description</b> | <b>DOS-SVI Index</b> | <b>DOS-SVI Percentile</b> | <b>SVI Percentile</b> |
|--------------------|---------------------------|----------------------|---------------------------|-----------------------|
| 28039              | George, MS                | -0.182               | 33.72                     | 61.37                 |
| 28041              | Greene, MS                | 0.697                | 93.7                      | 60.67                 |
| 28043              | Grenada, MS               | 0.624                | 91.75                     | 87.71                 |
| 28045              | Hancock, MS               | 0.361                | 81.92                     | 59.24                 |
| 28047              | Harrison, MS              | 0.566                | 90.26                     | 88.38                 |
| 28049              | Hinds, MS                 | 0.817                | 95.58                     | 87.42                 |
| 28051              | Holmes, MS                | 1.69                 | 99.71                     | 98.18                 |
| 28053              | Humphreys, MS             | 1.131                | 98.28                     | 93.69                 |
| 28055              | Issaquena, MS             | 1.359                | 99.11                     | 95.1                  |
| 28057              | Itawamba, MS              | 0.379                | 82.68                     | 54.87                 |
| 28059              | Jackson, MS               | 0.406                | 83.99                     | 54.33                 |
| 28061              | Jasper, MS                | 0.455                | 85.77                     | 76.91                 |
| 28063              | Jefferson, MS             | 1.405                | 99.24                     | 96.37                 |
| 28065              | Jefferson Davis, MS       | 0.491                | 87.52                     | 84.39                 |
| 28067              | Jones, MS                 | 0.356                | 81.63                     | 89.2                  |
| 28069              | Kemper, MS                | 1.19                 | 98.6                      | 92.74                 |
| 28071              | Lafayette, MS             | 0.764                | 94.75                     | 50.96                 |
| 28073              | Lamar, MS                 | 0.151                | 67.14                     | 53.06                 |
| 28075              | Lauderdale, MS            | 0.492                | 87.58                     | 92.83                 |
| 28077              | Lawrence, MS              | -0.035               | 48.17                     | 66.34                 |
| 28079              | Leake, MS                 | 0.637                | 92.17                     | 99.46                 |
| 28081              | Lee, MS                   | -0.017               | 50.43                     | 79.52                 |
| 28083              | Leflore, MS               | 1.311                | 98.92                     | 96.53                 |
| 28085              | Lincoln, MS               | 0.304                | 78.48                     | 75.86                 |
| 28087              | Lowndes, MS               | 0.689                | 93.6                      | 79.75                 |
| 28089              | Madison, MS               | 0.014                | 53.17                     | 28.98                 |
| 28091              | Marion, MS                | 0.245                | 74.15                     | 93.5                  |
| 28093              | Marshall, MS              | 0.472                | 86.76                     | 69.04                 |
| 28095              | Monroe, MS                | 0.119                | 63.32                     | 63.98                 |
| 28097              | Montgomery, MS            | 0.862                | 96.12                     | 89.14                 |
| 28099              | Neshoba, MS               | -0.028               | 48.87                     | 96.85                 |
| 28101              | Newton, MS                | 0.374                | 82.43                     | 92.13                 |
| 28103              | Noxubee, MS               | 0.574                | 90.45                     | 98.6                  |
| 28105              | Oktibbeha, MS             | 1.057                | 97.61                     | 64.2                  |
| 28107              | Panola, MS                | 0.195                | 70.58                     | 89.33                 |
| 28109              | Pearl River, MS           | 0.075                | 59.47                     | 70.51                 |
| 28111              | Perry, MS                 | 0.125                | 63.93                     | 70.86                 |
| 28113              | Pike, MS                  | 0.871                | 96.28                     | 98.82                 |
| 28115              | Pontotoc, MS              | -0.051               | 46.58                     | 89.62                 |
| 28117              | Prentiss, MS              | 0.29                 | 77.49                     | 85.13                 |
| 28119              | Quitman, MS               | 0.896                | 96.47                     | 95.45                 |
| 28121              | Rankin, MS                | -0.161               | 35.59                     | 31.27                 |
| 28123              | Scott, MS                 | 0.529                | 88.73                     | 98.5                  |
| 28125              | Sharkey, MS               | 0.27                 | 75.96                     | 97.29                 |
| 28127              | Simpson, MS               | 0.137                | 64.98                     | 90.73                 |
| 28129              | Smith, MS                 | 0.019                | 53.77                     | 47.32                 |
| 28131              | Stone, MS                 | -0.223               | 29.86                     | 60.45                 |
| 28133              | Sunflower, MS             | 1.491                | 99.49                     | 94.94                 |
| 28135              | Tallahatchie, MS          | 1.733                | 99.78                     | 97.36                 |
| 28137              | Tate, MS                  | 0.012                | 52.85                     | 86.5                  |
| 28139              | Tippah, MS                | 0.162                | 68.19                     | 86.46                 |
| 28141              | Tishomingo, MS            | 0.007                | 52.47                     | 66.59                 |
| 28143              | Tunica, MS                | 0.984                | 97.01                     | 97.2                  |
| 28145              | Union, MS                 | 0.005                | 52.24                     | 82.77                 |
| 28147              | Walthall, MS              | 0.24                 | 73.58                     | 86.11                 |

| <b>County FIPS</b> | <b>County Description</b> | <b>DOS-SVI Index</b> | <b>DOS-SVI Percentile</b> | <b>SVI Percentile</b> |
|--------------------|---------------------------|----------------------|---------------------------|-----------------------|
| 28149              | Warren, MS                | 0.422                | 84.53                     | 86.05                 |
| 28151              | Washington, MS            | 0.996                | 97.17                     | 97.83                 |
| 28153              | Wayne, MS                 | 0.339                | 80.52                     | 89.97                 |
| 28155              | Webster, MS               | 0.652                | 92.61                     | 59.62                 |
| 28157              | Wilkinson, MS             | 1.339                | 99.08                     | 91.69                 |
| 28159              | Winston, MS               | 0.26                 | 75.14                     | 93.06                 |
| 28161              | Yalobusha, MS             | -0.043               | 47.15                     | 73.47                 |
| 28163              | Yazoo, MS                 | 1.309                | 98.89                     | 99.52                 |
| 29001              | Adair, MO                 | 0.686                | 93.5                      | 45.48                 |
| 29003              | Andrew, MO                | -0.352               | 19.13                     | 3.25                  |
| 29005              | Atchison, MO              | -0.262               | 26.49                     | 7.36                  |
| 29007              | Audrain, MO               | 0.273                | 76.25                     | 61.5                  |
| 29009              | Barry, MO                 | -0.325               | 21.49                     | 70.99                 |
| 29011              | Barton, MO                | 0.017                | 53.55                     | 59.94                 |
| 29013              | Bates, MO                 | -0.271               | 25.72                     | 38.57                 |
| 29015              | Benton, MO                | -0.244               | 28.08                     | 55.13                 |
| 29017              | Bollinger, MO             | -0.033               | 48.46                     | 47.93                 |
| 29019              | Boone, MO                 | 0.292                | 77.68                     | 29.27                 |
| 29021              | Buchanan, MO              | 0.334                | 80.17                     | 71.82                 |
| 29023              | Butler, MO                | 0.524                | 88.54                     | 81.72                 |
| 29025              | Caldwell, MO              | -0.52                | 9.3                       | 45.13                 |
| 29027              | Callaway, MO              | 0.341                | 80.74                     | 32.32                 |
| 29029              | Camden, MO                | 0.042                | 56.06                     | 33.63                 |
| 29031              | Cape Girardeau, MO        | 0.14                 | 65.52                     | 41.18                 |
| 29033              | Carroll, MO               | -0.001               | 51.7                      | 53.25                 |
| 29035              | Carter, MO                | 0.051                | 57.27                     | 74.55                 |
| 29037              | Cass, MO                  | -0.269               | 25.95                     | 11.88                 |
| 29039              | Cedar, MO                 | 0.19                 | 70.36                     | 64.11                 |
| 29041              | Chariton, MO              | -0.336               | 20.31                     | 18.98                 |
| 29043              | Christian, MO             | -0.291               | 24.13                     | 14.97                 |
| 29045              | Clark, MO                 | -0.217               | 30.4                      | 34.2                  |
| 29047              | Clay, MO                  | -0.058               | 45.84                     | 13.63                 |
| 29049              | Clinton, MO               | 0.113                | 62.94                     | 16.43                 |
| 29051              | Cole, MO                  | 0.278                | 76.5                      | 25.83                 |
| 29053              | Cooper, MO                | 0.307                | 78.67                     | 38.92                 |
| 29055              | Crawford, MO              | 0.175                | 69.21                     | 75.54                 |
| 29057              | Dade, MO                  | 0.01                 | 52.69                     | 66.37                 |
| 29059              | Dallas, MO                | -0.111               | 40.5                      | 70.19                 |
| 29061              | Daviess, MO               | -0.52                | 9.33                      | 47.07                 |
| 29063              | DeKalb, MO                | 0.802                | 95.38                     | 40.54                 |
| 29065              | Dent, MO                  | 0.063                | 58.26                     | 63.12                 |
| 29067              | Douglas, MO               | -0.193               | 32.57                     | 52.32                 |
| 29069              | Dunklin, MO               | 0.604                | 91.28                     | 95.8                  |
| 29071              | Franklin, MO              | -0.13                | 38.68                     | 14.59                 |
| 29073              | Gasconade, MO             | -0.269               | 25.85                     | 8.54                  |
| 29075              | Gentry, MO                | -0.103               | 41.29                     | 43.89                 |
| 29077              | Greene, MO                | 0.261                | 75.23                     | 43.95                 |
| 29079              | Grundy, MO                | -0.028               | 49                        | 61.85                 |
| 29081              | Harrison, MO              | 0.249                | 74.47                     | 74.17                 |
| 29083              | Henry, MO                 | -0.03                | 48.77                     | 59.59                 |
| 29085              | Hickory, MO               | -0.244               | 28.05                     | 46.72                 |
| 29087              | Holt, MO                  | -0.051               | 46.45                     | 19.59                 |
| 29089              | Howard, MO                | 0.205                | 71.16                     | 40.41                 |
| 29091              | Howell, MO                | 0.162                | 68.23                     | 67.17                 |
| 29093              | Iron, MO                  | 0.184                | 69.85                     | 78.22                 |



| <b>County FIPS</b> | <b>County Description</b> | <b>DOS-SVI Index</b> | <b>DOS-SVI Percentile</b> | <b>SVI Percentile</b> |
|--------------------|---------------------------|----------------------|---------------------------|-----------------------|
| 29095              | Jackson, MO               | 0.348                | 81.18                     | 53.54                 |
| 29097              | Jasper, MO                | 0.08                 | 60.01                     | 65.64                 |
| 29099              | Jefferson, MO             | -0.026               | 49.25                     | 18.63                 |
| 29101              | Johnson, MO               | 0.14                 | 65.49                     | 35.06                 |
| 29103              | Knox, MO                  | 0.307                | 78.64                     | 55.7                  |
| 29105              | Laclede, MO               | -0.235               | 28.94                     | 61.78                 |
| 29107              | Lafayette, MO             | -0.052               | 46.32                     | 38.82                 |
| 29109              | Lawrence, MO              | -0.18                | 33.91                     | 78.66                 |
| 29111              | Lewis, MO                 | -0.006               | 51.26                     | 44.65                 |
| 29113              | Lincoln, MO               | -0.003               | 51.42                     | 29.39                 |
| 29115              | Linn, MO                  | 0.089                | 61                        | 27.2                  |
| 29117              | Livingston, MO            | 0.283                | 77.05                     | 37.48                 |
| 29119              | McDonald, MO              | -0.49                | 10.7                      | 86.31                 |
| 29121              | Macon, MO                 | 0.077                | 59.69                     | 58.6                  |
| 29123              | Madison, MO               | -0.358               | 18.72                     | 47.77                 |
| 29125              | Maries, MO                | -0.089               | 42.47                     | 51.18                 |
| 29127              | Marion, MO                | 0.389                | 83.25                     | 54.59                 |
| 29129              | Mercer, MO                | -0.474               | 11.46                     | 30.45                 |
| 29131              | Miller, MO                | 0.107                | 62.34                     | 50.1                  |
| 29133              | Mississippi, MO           | 1.052                | 97.58                     | 90.76                 |
| 29135              | Moniteau, MO              | -0.1                 | 41.71                     | 51.43                 |
| 29137              | Monroe, MO                | -0.027               | 49.19                     | 38.76                 |
| 29139              | Montgomery, MO            | 0.16                 | 68.04                     | 53.31                 |
| 29141              | Morgan, MO                | 0.144                | 66.06                     | 62.9                  |
| 29143              | New Madrid, MO            | 0.658                | 92.87                     | 89.68                 |
| 29145              | Newton, MO                | -0.267               | 26.14                     | 43.41                 |
| 29147              | Nodaway, MO               | 0.752                | 94.62                     | 22.2                  |
| 29149              | Oregon, MO                | 0.234                | 73.19                     | 48.85                 |
| 29151              | Osage, MO                 | -0.504               | 10.09                     | 4.97                  |
| 29153              | Ozark, MO                 | 0.044                | 56.26                     | 58.25                 |
| 29155              | Pemiscot, MO              | 0.749                | 94.59                     | 93.03                 |
| 29157              | Perry, MO                 | -0.219               | 30.28                     | 23.12                 |
| 29159              | Pettis, MO                | 0.209                | 71.51                     | 80.35                 |
| 29161              | Phelps, MO                | 0.48                 | 87.11                     | 65.96                 |
| 29163              | Pike, MO                  | 0.493                | 87.61                     | 53.76                 |
| 29165              | Platte, MO                | -0.102               | 41.36                     | 9.59                  |
| 29167              | Polk, MO                  | 0.081                | 60.17                     | 59.87                 |
| 29169              | Pulaski, MO               | 0.753                | 94.65                     | 65.03                 |
| 29171              | Putnam, MO                | 0.223                | 72.65                     | 57.64                 |
| 29173              | Ralls, MO                 | -0.207               | 31.2                      | 10.45                 |
| 29175              | Randolph, MO              | 0.491                | 87.55                     | 55.54                 |
| 29177              | Ray, MO                   | 0.022                | 54.06                     | 25.73                 |
| 29179              | Reynolds, MO              | 0.145                | 66.22                     | 55.73                 |
| 29181              | Ripley, MO                | 0.433                | 85                        | 71.5                  |
| 29183              | St. Charles, MO           | -0.228               | 29.39                     | 3.63                  |
| 29185              | St. Clair, MO             | 0.07                 | 58.93                     | 49.87                 |
| 29186              | Ste. Genevieve, MO        | 0.121                | 63.55                     | 18.85                 |
| 29187              | St. Francois, MO          | 0.482                | 87.17                     | 70.16                 |
| 29189              | St. Louis, MO             | -0.002               | 51.58                     | 26.11                 |
| 29195              | Saline, MO                | 0.16                 | 67.94                     | 81.62                 |
| 29197              | Schuyler, MO              | -0.098               | 41.9                      | 38.31                 |
| 29199              | Scotland, MO              | -0.551               | 8.4                       | 53.03                 |
| 29201              | Scott, MO                 | 0.255                | 74.82                     | 78.44                 |
| 29203              | Shannon, MO               | 0.341                | 80.77                     | 64.49                 |
| 29205              | Shelby, MO                | -0.059               | 45.75                     | 39.84                 |

| <b>County FIPS</b> | <b>County Description</b> | <b>DOS-SVI Index</b> | <b>DOS-SVI Percentile</b> | <b>SVI Percentile</b> |
|--------------------|---------------------------|----------------------|---------------------------|-----------------------|
| 29207              | Stoddard, MO              | 0.071                | 59.22                     | 46.43                 |
| 29209              | Stone, MO                 | -0.375               | 17.16                     | 34.87                 |
| 29211              | Sullivan, MO              | -0.193               | 32.63                     | 62.96                 |
| 29213              | Taney, MO                 | 0.347                | 81.12                     | 82.17                 |
| 29215              | Texas, MO                 | 0.531                | 88.83                     | 83.03                 |
| 29217              | Vernon, MO                | -0.08                | 43.52                     | 45.1                  |
| 29219              | Warren, MO                | -0.467               | 11.65                     | 38.41                 |
| 29221              | Washington, MO            | 0.291                | 77.59                     | 79.04                 |
| 29223              | Wayne, MO                 | 0.05                 | 57.15                     | 76.46                 |
| 29225              | Webster, MO               | -0.444               | 12.86                     | 63.85                 |
| 29227              | Worth, MO                 | -0.04                | 47.63                     | 22.39                 |
| 29229              | Wright, MO                | 0.121                | 63.58                     | 90.06                 |
| 29510              | St. Louis City, MO        | 0.838                | 95.77                     | 77.96                 |
| 30001              | Beaverhead, MT            | -0.281               | 24.9                      | 25.16                 |
| 30003              | Big Horn, MT              | -1.337               | 0.57                      | 82.74                 |
| 30005              | Blaine, MT                | -0.02                | 50.08                     | 91.5                  |
| 30007              | Broadwater, MT            | -0.419               | 14.04                     | 4.2                   |
| 30009              | Carbon, MT                | -0.298               | 23.75                     | 4.33                  |
| 30011              | Carter, MT                | -0.561               | 7.96                      | 4.87                  |
| 30013              | Cascade, MT               | 0.017                | 53.61                     | 41.02                 |
| 30015              | Chouteau, MT              | -0.242               | 28.37                     | 47.99                 |
| 30017              | Custer, MT                | 0.046                | 56.51                     | 29.01                 |
| 30019              | Daniels, MT               | -0.458               | 12.1                      | 2.42                  |
| 30021              | Dawson, MT                | -0.428               | 13.66                     | 7.52                  |
| 30023              | Deer Lodge, MT            | 0.538                | 89.21                     | 47.17                 |
| 30025              | Fallon, MT                | -0.514               | 9.71                      | 2.17                  |
| 30027              | Fergus, MT                | -0.242               | 28.24                     | 23.76                 |
| 30029              | Flathead, MT              | -0.462               | 11.81                     | 9.24                  |
| 30031              | Gallatin, MT              | -0.145               | 37.44                     | 4.27                  |
| 30033              | Garfield, MT              | -0.91                | 2.1                       | 0.76                  |
| 30035              | Glacier, MT               | 0.275                | 76.31                     | 85.83                 |
| 30037              | Golden Valley, MT         | -0.123               | 39.48                     | 5.19                  |
| 30039              | Granite, MT               | -0.703               | 4.08                      | 7.64                  |
| 30041              | Hill, MT                  | 0.593                | 90.96                     | 69.84                 |
| 30043              | Jefferson, MT             | -0.374               | 17.32                     | 4.81                  |
| 30045              | Judith Basin, MT          | -0.035               | 48.04                     | 1.62                  |
| 30047              | Lake, MT                  | -0.033               | 48.33                     | 64.68                 |
| 30049              | Lewis and Clark, MT       | -0.123               | 39.45                     | 12.58                 |
| 30051              | Liberty, MT               | -0.423               | 13.88                     | 40.99                 |
| 30053              | Lincoln, MT               | -0.069               | 44.73                     | 41.94                 |
| 30055              | McCone, MT                | -1.193               | 0.76                      | 7.74                  |
| 30057              | Madison, MT               | -0.462               | 11.91                     | 17.26                 |
| 30059              | Meagher, MT               | -0.305               | 23.24                     | 4.65                  |
| 30061              | Mineral, MT               | 0.002                | 51.96                     | 56.21                 |
| 30063              | Missoula, MT              | 0.087                | 60.74                     | 17.8                  |
| 30065              | Musselshell, MT           | -0.779               | 3.28                      | 35.51                 |
| 30067              | Park, MT                  | -0.323               | 21.71                     | 6.88                  |
| 30069              | Petroleum, MT             | -0.683               | 4.62                      | 0.29                  |
| 30071              | Phillips, MT              | -0.618               | 6.18                      | 41.46                 |
| 30073              | Pondera, MT               | 0.132                | 64.44                     | 82.96                 |
| 30075              | Powder River, MT          | -0.088               | 42.57                     | 3.92                  |
| 30077              | Powell, MT                | 0.459                | 85.96                     | 25.45                 |
| 30079              | Prairie, MT               | -0.572               | 7.64                      | 7.58                  |
| 30081              | Ravalli, MT               | -0.263               | 26.36                     | 18.6                  |
| 30083              | Richland, MT              | -0.618               | 6.14                      | 21.21                 |

| <b>County FIPS</b> | <b>County Description</b> | <b>DOS-SVI Index</b> | <b>DOS-SVI Percentile</b> | <b>SVI Percentile</b> |
|--------------------|---------------------------|----------------------|---------------------------|-----------------------|
| 30085              | Roosevelt, MT             | 0.157                | 67.65                     | 88.79                 |
| 30087              | Rosebud, MT               | -0.609               | 6.34                      | 60.7                  |
| 30089              | Sanders, MT               | -0.183               | 33.65                     | 34.78                 |
| 30091              | Sheridan, MT              | -0.601               | 6.62                      | 9.49                  |
| 30093              | Silver Bow, MT            | 0.242                | 73.83                     | 52.58                 |
| 30095              | Stillwater, MT            | -0.654               | 5.19                      | 3.6                   |
| 30097              | Sweet Grass, MT           | -0.591               | 7.04                      | 0.86                  |
| 30099              | Teton, MT                 | -0.702               | 4.11                      | 29.81                 |
| 30101              | Toole, MT                 | 0.54                 | 89.27                     | 47.68                 |
| 30103              | Treasure, MT              | -0.379               | 16.81                     | 5.67                  |
| 30105              | Valley, MT                | -0.323               | 21.75                     | 11.62                 |
| 30107              | Wheatland, MT             | -0.363               | 18.21                     | 54.36                 |
| 30109              | Wibaux, MT                | 0.121                | 63.52                     | 39.33                 |
| 30111              | Yellowstone, MT           | -0.256               | 27                        | 24.97                 |
| 31001              | Adams, NE                 | -0.084               | 43.11                     | 35.92                 |
| 31003              | Antelope, NE              | -0.347               | 19.48                     | 10.32                 |
| 31005              | Arthur, NE                | -0.778               | 3.31                      | 0.83                  |
| 31007              | Banner, NE                | -0.322               | 21.78                     | 0.41                  |
| 31009              | Blaine, NE                | -1.069               | 1.34                      | 9.08                  |
| 31011              | Boone, NE                 | -0.605               | 6.46                      | 2.83                  |
| 31013              | Box Butte, NE             | 0.018                | 53.74                     | 35.86                 |
| 31015              | Boyd, NE                  | -0.532               | 9.07                      | 9.2                   |
| 31017              | Brown, NE                 | -0.402               | 15.09                     | 12.52                 |
| 31019              | Buffalo, NE               | -0.001               | 51.73                     | 26.56                 |
| 31021              | Burt, NE                  | -0.359               | 18.66                     | 25.41                 |
| 31023              | Butler, NE                | -0.392               | 15.82                     | 11.72                 |
| 31025              | Cass, NE                  | -0.452               | 12.48                     | 1.08                  |
| 31027              | Cedar, NE                 | -0.561               | 7.93                      | 1.21                  |
| 31029              | Chase, NE                 | -0.454               | 12.29                     | 15.51                 |
| 31031              | Cherry, NE                | -0.237               | 28.65                     | 22.61                 |
| 31033              | Cheyenne, NE              | -0.455               | 12.22                     | 12.1                  |
| 31035              | Clay, NE                  | -0.322               | 21.81                     | 16.46                 |
| 31037              | Colfax, NE                | -1.138               | 0.89                      | 51.88                 |
| 31039              | Cuming, NE                | -0.348               | 19.36                     | 19.36                 |
| 31041              | Custer, NE                | -0.32                | 21.97                     | 18.18                 |
| 31043              | Dakota, NE                | -0.43                | 13.5                      | 86.15                 |
| 31045              | Dawes, NE                 | 0.352                | 81.34                     | 17.17                 |
| 31047              | Dawson, NE                | -0.251               | 27.48                     | 79.33                 |
| 31049              | Deuel, NE                 | -0.17                | 34.73                     | 16.5                  |
| 31051              | Dixon, NE                 | -0.355               | 18.78                     | 37.9                  |
| 31053              | Dodge, NE                 | -0.12                | 39.64                     | 56.91                 |
| 31055              | Douglas, NE               | 0.111                | 62.78                     | 46.69                 |
| 31057              | Dundy, NE                 | -0.069               | 44.8                      | 30.38                 |
| 31059              | Fillmore, NE              | -0.195               | 32.44                     | 6.18                  |
| 31061              | Franklin, NE              | -0.184               | 33.59                     | 7.68                  |
| 31063              | Frontier, NE              | -0.167               | 35.02                     | 9.94                  |
| 31065              | Furnas, NE                | -0.237               | 28.72                     | 18.25                 |
| 31067              | Gage, NE                  | -0.083               | 43.33                     | 11.05                 |
| 31069              | Garden, NE                | -0.596               | 6.88                      | 1.43                  |
| 31071              | Garfield, NE              | -0.315               | 22.38                     | 4.3                   |
| 31073              | Gosper, NE                | -0.652               | 5.22                      | 0.51                  |
| 31075              | Grant, NE                 | -0.118               | 39.83                     | 13.28                 |
| 31077              | Greeley, NE               | -0.628               | 5.95                      | 4.11                  |
| 31079              | Hall, NE                  | -0.025               | 49.44                     | 67.01                 |
| 31081              | Hamilton, NE              | -0.34                | 19.96                     | 0.89                  |

| <b>County FIPS</b> | <b>County Description</b> | <b>DOS-SVI Index</b> | <b>DOS-SVI Percentile</b> | <b>SVI Percentile</b> |
|--------------------|---------------------------|----------------------|---------------------------|-----------------------|
| 31083              | Harlan, NE                | -0.389               | 16.11                     | 12.39                 |
| 31085              | Hayes, NE                 | -0.27                | 25.76                     | 4.36                  |
| 31087              | Hitchcock, NE             | -0.266               | 26.23                     | 19.43                 |
| 31089              | Holt, NE                  | -0.525               | 9.2                       | 9.81                  |
| 31091              | Hooker, NE                | 0.158                | 67.78                     | 14.68                 |
| 31093              | Howard, NE                | -0.279               | 25.12                     | 8.03                  |
| 31095              | Jefferson, NE             | -0.006               | 51.23                     | 21.85                 |
| 31097              | Johnson, NE               | 0.574                | 90.42                     | 57.77                 |
| 31099              | Kearney, NE               | -0.568               | 7.83                      | 9.39                  |
| 31101              | Keith, NE                 | -0.299               | 23.56                     | 22.68                 |
| 31103              | Keya Paha, NE             | -0.772               | 3.41                      | 0.1                   |
| 31105              | Kimball, NE               | 0.02                 | 53.93                     | 56.11                 |
| 31107              | Knox, NE                  | -0.687               | 4.52                      | 32.77                 |
| 31109              | Lancaster, NE             | 0.141                | 65.71                     | 30.25                 |
| 31111              | Lincoln, NE               | -0.104               | 41.1                      | 36.75                 |
| 31113              | Logan, NE                 | -1.213               | 0.7                       | 10.73                 |
| 31115              | Loup, NE                  | -0.49                | 10.63                     | 0.45                  |
| 31117              | McPherson, NE             | -1.122               | 1.15                      | 8.38                  |
| 31119              | Madison, NE               | -0.066               | 45.05                     | 51.05                 |
| 31121              | Merrick, NE               | -0.379               | 16.91                     | 19.75                 |
| 31123              | Morrill, NE               | -0.062               | 45.49                     | 42.2                  |
| 31125              | Nance, NE                 | 0.052                | 57.4                      | 8.25                  |
| 31127              | Nemaha, NE                | 0.243                | 73.89                     | 16.59                 |
| 31129              | Nuckolls, NE              | -0.28                | 25.06                     | 17.36                 |
| 31131              | Otoe, NE                  | -0.169               | 34.83                     | 22.87                 |
| 31133              | Pawnee, NE                | -0.519               | 9.39                      | 23.18                 |
| 31135              | Perkins, NE               | -0.739               | 3.69                      | 5.38                  |
| 31137              | Phelps, NE                | -0.345               | 19.71                     | 12.26                 |
| 31139              | Pierce, NE                | -0.375               | 17.19                     | 2.29                  |
| 31141              | Platte, NE                | -0.579               | 7.39                      | 29.94                 |
| 31143              | Polk, NE                  | -0.608               | 6.37                      | 19.08                 |
| 31145              | Red Willow, NE            | 0.071                | 59.19                     | 23.73                 |
| 31147              | Richardson, NE            | -0.02                | 50.11                     | 10.25                 |
| 31149              | Rock, NE                  | -0.48                | 11.11                     | 0.92                  |
| 31151              | Saline, NE                | -0.129               | 38.75                     | 59.78                 |
| 31153              | Sarpy, NE                 | -0.286               | 24.58                     | 9.71                  |
| 31155              | Saunders, NE              | -0.334               | 20.57                     | 4.24                  |
| 31157              | Scotts Bluff, NE          | 0.212                | 71.89                     | 56.75                 |
| 31159              | Seward, NE                | -0.041               | 47.6                      | 4.68                  |
| 31161              | Sheridan, NE              | -0.326               | 21.46                     | 59.68                 |
| 31163              | Sherman, NE               | -0.36                | 18.53                     | 7.39                  |
| 31165              | Sioux, NE                 | -0.353               | 18.98                     | 1.78                  |
| 31167              | Stanton, NE               | -0.259               | 26.74                     | 5.7                   |
| 31169              | Thayer, NE                | -0.38                | 16.68                     | 5.8                   |
| 31171              | Thomas, NE                | -0.334               | 20.6                      | 0.35                  |
| 31173              | Thurston, NE              | -0.689               | 4.42                      | 88.66                 |
| 31175              | Valley, NE                | -0.342               | 19.87                     | 14.84                 |
| 31177              | Washington, NE            | -0.338               | 20.09                     | 3.79                  |
| 31179              | Wayne, NE                 | 0.231                | 73.03                     | 8.47                  |
| 31181              | Webster, NE               | -0.139               | 38.14                     | 10.92                 |
| 31183              | Wheeler, NE               | -0.427               | 13.72                     | 0.48                  |
| 31185              | York, NE                  | -0.025               | 49.35                     | 18.28                 |
| 32001              | Churchill, NV             | -0.284               | 24.74                     | 60.48                 |
| 32003              | Clark, NV                 | -0.033               | 48.42                     | 74.04                 |
| 32005              | Douglas, NV               | -0.493               | 10.54                     | 17.93                 |

| <b>County FIPS</b> | <b>County Description</b> | <b>DOS-SVI Index</b> | <b>DOS-SVI Percentile</b> | <b>SVI Percentile</b> |
|--------------------|---------------------------|----------------------|---------------------------|-----------------------|
| 32007              | Elko, NV                  | -0.335               | 20.44                     | 51.78                 |
| 32009              | Esmeralda, NV             | -0.83                | 2.74                      | 63.95                 |
| 32011              | Eureka, NV                | -0.549               | 8.5                       | 6.75                  |
| 32013              | Humboldt, NV              | -0.504               | 10.06                     | 58.69                 |
| 32015              | Lander, NV                | -0.446               | 12.77                     | 82.61                 |
| 32017              | Lincoln, NV               | 0.11                 | 62.56                     | 42.13                 |
| 32019              | Lyon, NV                  | -0.353               | 19.01                     | 57.83                 |
| 32021              | Mineral, NV               | 0.158                | 67.75                     | 88.15                 |
| 32023              | Nye, NV                   | -0.406               | 14.87                     | 73.09                 |
| 32027              | Pershing, NV              | 0.517                | 88.41                     | 90.38                 |
| 32029              | Storey, NV                | -0.138               | 38.17                     | 7.17                  |
| 32031              | Washoe, NV                | -0.322               | 21.84                     | 52.71                 |
| 32033              | White Pine, NV            | 0.146                | 66.41                     | 37.42                 |
| 32510              | Carson City, NV           | 0.027                | 54.57                     | 84.43                 |
| 33001              | Belknap, NH               | -0.301               | 23.43                     | 8.41                  |
| 33003              | Carroll, NH               | -0.399               | 15.41                     | 5.83                  |
| 33005              | Cheshire, NH              | 0.066                | 58.64                     | 14.17                 |
| 33007              | Coos, NH                  | 0.278                | 76.54                     | 52.9                  |
| 33009              | Grafton, NH               | 0.005                | 52.28                     | 18.82                 |
| 33011              | Hillsborough, NH          | -0.119               | 39.73                     | 19.11                 |
| 33013              | Merrimack, NH             | -0.103               | 41.2                      | 14.55                 |
| 33015              | Rockingham, NH            | -0.374               | 17.22                     | 1.11                  |
| 33017              | Strafford, NH             | 0.068                | 58.74                     | 17.48                 |
| 33019              | Sullivan, NH              | 0.055                | 57.62                     | 15.13                 |
| 34001              | Atlantic, NJ              | 0.159                | 67.91                     | 79.11                 |
| 34003              | Bergen, NJ                | -0.567               | 7.86                      | 23.95                 |
| 34005              | Burlington, NJ            | -0.214               | 30.75                     | 20.54                 |
| 34007              | Camden, NJ                | 0.176                | 69.28                     | 61.18                 |
| 34009              | Cape May, NJ              | -0.326               | 21.36                     | 33.98                 |
| 34011              | Cumberland, NJ            | 0.537                | 89.17                     | 95.92                 |
| 34013              | Essex, NJ                 | 0.101                | 61.95                     | 84.04                 |
| 34015              | Gloucester, NJ            | -0.204               | 31.42                     | 16.75                 |
| 34017              | Hudson, NJ                | -0.499               | 10.22                     | 64.24                 |
| 34019              | Hunterdon, NJ             | -0.539               | 8.88                      | 2.64                  |
| 34021              | Mercer, NJ                | -0.016               | 50.52                     | 55.8                  |
| 34023              | Middlesex, NJ             | -0.418               | 14.14                     | 46.59                 |
| 34025              | Monmouth, NJ              | -0.429               | 13.59                     | 16.05                 |
| 34027              | Morris, NJ                | -0.598               | 6.75                      | 12.01                 |
| 34029              | Ocean, NJ                 | -0.61                | 6.27                      | 33.54                 |
| 34031              | Passaic, NJ               | -0.6                 | 6.72                      | 77.64                 |
| 34033              | Salem, NJ                 | 0.086                | 60.65                     | 59.01                 |
| 34035              | Somerset, NJ              | -0.547               | 8.6                       | 10                    |
| 34037              | Sussex, NJ                | -0.463               | 11.78                     | 1.91                  |
| 34039              | Union, NJ                 | -0.432               | 13.37                     | 62.32                 |
| 34041              | Warren, NJ                | -0.255               | 27.06                     | 21.78                 |
| 35001              | Bernalillo, NM            | 0.277                | 76.47                     | 68.28                 |
| 35003              | Catron, NM                | 0.214                | 72.05                     | 33.57                 |
| 35005              | Chaves, NM                | 0.387                | 83.09                     | 95.51                 |
| 35006              | Cibola, NM                | 0.267                | 75.61                     | 99.84                 |
| 35007              | Colfax, NM                | 0.464                | 86.31                     | 96.27                 |
| 35009              | Curry, NM                 | 0.32                 | 79.5                      | 87.74                 |
| 35011              | De Baca, NM               | -0.018               | 50.33                     | 69.39                 |
| 35013              | Dona Ana, NM              | 0.31                 | 78.86                     | 98.41                 |
| 35015              | Eddy, NM                  | -0.223               | 29.96                     | 70.32                 |
| 35017              | Grant, NM                 | 0.146                | 66.38                     | 92.96                 |

| <b>County FIPS</b> | <b>County Description</b> | <b>DOS-SVI Index</b> | <b>DOS-SVI Percentile</b> | <b>SVI Percentile</b> |
|--------------------|---------------------------|----------------------|---------------------------|-----------------------|
| 35019              | Guadalupe, NM             | 1.06                 | 97.68                     | 95.29                 |
| 35021              | Harding, NM               | -0.422               | 13.91                     | 36.15                 |
| 35023              | Hidalgo, NM               | 0.297                | 78                        | 96.31                 |
| 35025              | Lea, NM                   | -0.13                | 38.65                     | 92.17                 |
| 35027              | Lincoln, NM               | -0.411               | 14.49                     | 47.96                 |
| 35028              | Los Alamos, NM            | -0.595               | 6.91                      | 2.48                  |
| 35029              | Luna, NM                  | 0.25                 | 74.5                      | 99.9                  |
| 35031              | McKinley, NM              | -0.488               | 10.82                     | 98.89                 |
| 35033              | Mora, NM                  | -0.15                | 36.93                     | 79.59                 |
| 35035              | Otero, NM                 | 0.143                | 65.9                      | 91.4                  |
| 35037              | Quay, NM                  | 0.599                | 91.12                     | 80.96                 |
| 35041              | Roosevelt, NM             | 0.322                | 79.66                     | 94.3                  |
| 35043              | Sandoval, NM              | -0.156               | 36.26                     | 48.18                 |
| 35045              | San Juan, NM              | -0.246               | 27.95                     | 91.94                 |
| 35047              | San Miguel, NM            | 0.93                 | 96.75                     | 98.63                 |
| 35049              | Santa Fe, NM              | -0.224               | 29.8                      | 52.55                 |
| 35051              | Sierra, NM                | 0.51                 | 88.16                     | 91.46                 |
| 35053              | Socorro, NM               | 0.42                 | 84.4                      | 97.45                 |
| 35055              | Taos, NM                  | 0.302                | 78.32                     | 85.86                 |
| 35057              | Torrance, NM              | 0.004                | 52.15                     | 74.9                  |
| 35059              | Union, NM                 | 0.647                | 92.58                     | 67.93                 |
| 35061              | Valencia, NM              | 0.203                | 71.03                     | 90.41                 |
| 36001              | Albany, NY                | 0.149                | 66.83                     | 30.41                 |
| 36003              | Allegany, NY              | 0.397                | 83.6                      | 58.18                 |
| 36005              | Bronx, NY                 | 0.304                | 78.51                     | 99.27                 |
| 36007              | Broome, NY                | 0.256                | 74.91                     | 61.66                 |
| 36009              | Cattaraugus, NY           | 0.073                | 59.31                     | 72.83                 |
| 36011              | Cayuga, NY                | 0.334                | 80.39                     | 50.25                 |
| 36013              | Chautauqua, NY            | 0.291                | 77.56                     | 72.48                 |
| 36015              | Chemung, NY               | 0.374                | 82.46                     | 48.5                  |
| 36017              | Chenango, NY              | -0.102               | 41.58                     | 56.46                 |
| 36019              | Clinton, NY               | 0.495                | 87.78                     | 53.12                 |
| 36021              | Columbia, NY              | -0.091               | 42.38                     | 38.54                 |
| 36023              | Cortland, NY              | 0.33                 | 80.07                     | 34.52                 |
| 36025              | Delaware, NY              | -0.04                | 47.69                     | 63.31                 |
| 36027              | Dutchess, NY              | -0.337               | 20.25                     | 42.07                 |
| 36029              | Erie, NY                  | 0.122                | 63.67                     | 41.4                  |
| 36031              | Essex, NY                 | 0.042                | 56.13                     | 38.69                 |
| 36033              | Franklin, NY              | 0.624                | 91.79                     | 70.73                 |
| 36035              | Fulton, NY                | 0.34                 | 80.67                     | 50.1                  |
| 36037              | Genesee, NY               | -0.018               | 50.37                     | 18.79                 |
| 36039              | Greene, NY                | -0.088               | 42.53                     | 41.59                 |
| 36041              | Hamilton, NY              | -0.251               | 27.38                     | 38.98                 |
| 36043              | Herkimer, NY              | -0.012               | 50.81                     | 53.22                 |
| 36045              | Jefferson, NY             | 0.248                | 74.31                     | 64.84                 |
| 36047              | Kings, NY                 | -1.037               | 1.53                      | 81.53                 |
| 36049              | Lewis, NY                 | -0.059               | 45.69                     | 29.11                 |
| 36051              | Livingston, NY            | 0.293                | 77.75                     | 34.24                 |
| 36053              | Madison, NY               | 0.056                | 57.82                     | 16.66                 |
| 36055              | Monroe, NY                | 0.291                | 77.62                     | 52.04                 |
| 36057              | Montgomery, NY            | 0.255                | 74.85                     | 83.06                 |
| 36059              | Nassau, NY                | -0.735               | 3.79                      | 24.3                  |
| 36061              | New York, NY              | -0.308               | 22.99                     | 55.1                  |
| 36063              | Niagara, NY               | 0.126                | 63.99                     | 33.18                 |
| 36065              | Oneida, NY                | 0.256                | 74.94                     | 69.46                 |

| <b>County FIPS</b> | <b>County Description</b> | <b>DOS-SVI Index</b> | <b>DOS-SVI Percentile</b> | <b>SVI Percentile</b> |
|--------------------|---------------------------|----------------------|---------------------------|-----------------------|
| 36067              | Onondaga, NY              | 0.263                | 75.42                     | 52.07                 |
| 36069              | Ontario, NY               | -0.096               | 42.06                     | 23.15                 |
| 36071              | Orange, NY                | -0.458               | 12.07                     | 55.38                 |
| 36073              | Orleans, NY               | 0.32                 | 79.43                     | 64.3                  |
| 36075              | Oswego, NY                | 0.291                | 77.65                     | 64.97                 |
| 36077              | Otsego, NY                | 0.122                | 63.77                     | 42.36                 |
| 36079              | Putnam, NY                | -0.589               | 7.07                      | 8.12                  |
| 36081              | Queens, NY                | -1.066               | 1.37                      | 62.01                 |
| 36083              | Rensselaer, NY            | 0.131                | 64.37                     | 34.3                  |
| 36085              | Richmond, NY              | -0.556               | 8.15                      | 47.64                 |
| 36087              | Rockland, NY              | -1.124               | 1.11                      | 60.38                 |
| 36089              | St. Lawrence, NY          | 0.517                | 88.38                     | 74.75                 |
| 36091              | Saratoga, NY              | -0.313               | 22.7                      | 4.75                  |
| 36093              | Schenectady, NY           | 0.037                | 55.68                     | 39.43                 |
| 36095              | Schoharie, NY             | 0.254                | 74.78                     | 40.13                 |
| 36097              | Schuyler, NY              | -0.132               | 38.55                     | 36.91                 |
| 36099              | Seneca, NY                | 0.269                | 75.77                     | 44.9                  |
| 36101              | Steuben, NY               | 0.046                | 56.57                     | 46.91                 |
| 36103              | Suffolk, NY               | -0.596               | 6.78                      | 21.46                 |
| 36105              | Sullivan, NY              | 0.083                | 60.33                     | 79.39                 |
| 36107              | Tioga, NY                 | -0.197               | 32.12                     | 19.94                 |
| 36109              | Tompkins, NY              | 0.569                | 90.29                     | 34.62                 |
| 36111              | Ulster, NY                | 0.086                | 60.68                     | 47.04                 |
| 36113              | Warren, NY                | -0.18                | 33.94                     | 17.42                 |
| 36115              | Washington, NY            | 0.058                | 57.85                     | 40                    |
| 36117              | Wayne, NY                 | -0.02                | 50.17                     | 34.14                 |
| 36119              | Westchester, NY           | -0.477               | 11.33                     | 55.16                 |
| 36121              | Wyoming, NY               | 0.223                | 72.68                     | 31.21                 |
| 36123              | Yates, NY                 | -0.386               | 16.3                      | 43.92                 |
| 37001              | Alamance, NC              | 0.247                | 74.18                     | 78.38                 |
| 37003              | Alexander, NC             | -0.205               | 31.3                      | 63.41                 |
| 37005              | Alleghany, NC             | 0.421                | 84.5                      | 62.68                 |
| 37007              | Anson, NC                 | 0.431                | 84.88                     | 94.43                 |
| 37009              | Ashe, NC                  | 0.131                | 64.41                     | 49.94                 |
| 37011              | Avery, NC                 | 0.645                | 92.52                     | 64.46                 |
| 37013              | Beaufort, NC              | 0.136                | 64.92                     | 71.56                 |
| 37015              | Bertie, NC                | 0.526                | 88.63                     | 93.85                 |
| 37017              | Bladen, NC                | 0.439                | 85.2                      | 94.46                 |
| 37019              | Brunswick, NC             | -0.329               | 21.08                     | 35.83                 |
| 37021              | Buncombe, NC              | -0.361               | 18.46                     | 37.99                 |
| 37023              | Burke, NC                 | 0.047                | 56.67                     | 84.87                 |
| 37025              | Cabarrus, NC              | -0.352               | 19.07                     | 41.75                 |
| 37027              | Caldwell, NC              | 0.076                | 59.57                     | 65.1                  |
| 37029              | Camden, NC                | 0.013                | 53.1                      | 30.7                  |
| 37031              | Carteret, NC              | 0.017                | 53.45                     | 42.55                 |
| 37033              | Caswell, NC               | 0.11                 | 62.69                     | 83.6                  |
| 37035              | Catawba, NC               | -0.185               | 33.43                     | 64.81                 |
| 37037              | Chatham, NC               | -0.408               | 14.61                     | 38.09                 |
| 37039              | Cherokee, NC              | -0.277               | 25.34                     | 48.69                 |
| 37041              | Chowan, NC                | 0.285                | 77.27                     | 81.18                 |
| 37043              | Clay, NC                  | -0.345               | 19.68                     | 21.91                 |
| 37045              | Cleveland, NC             | 0.289                | 77.43                     | 83.5                  |
| 37047              | Columbus, NC              | 0.458                | 85.9                      | 94.81                 |
| 37049              | Craven, NC                | 0.101                | 61.92                     | 80.99                 |
| 37051              | Cumberland, NC            | 0.713                | 93.98                     | 86.4                  |

| <b>County FIPS</b> | <b>County Description</b> | <b>DOS-SVI Index</b> | <b>DOS-SVI Percentile</b> | <b>SVI Percentile</b> |
|--------------------|---------------------------|----------------------|---------------------------|-----------------------|
| 37053              | Currituck, NC             | -0.201               | 31.61                     | 11.94                 |
| 37055              | Dare, NC                  | -0.537               | 9.04                      | 14.49                 |
| 37057              | Davidson, NC              | -0.051               | 46.55                     | 68.41                 |
| 37059              | Davie, NC                 | -0.327               | 21.3                      | 44.11                 |
| 37061              | Duplin, NC                | -0.1                 | 41.67                     | 97.9                  |
| 37063              | Durham, NC                | 0.386                | 83.06                     | 61.97                 |
| 37065              | Edgecombe, NC             | 0.677                | 93.41                     | 97.26                 |
| 37067              | Forsyth, NC               | 0.294                | 77.91                     | 68.34                 |
| 37069              | Franklin, NC              | -0.053               | 46.23                     | 63.76                 |
| 37071              | Gaston, NC                | 0.075                | 59.38                     | 67.2                  |
| 37073              | Gates, NC                 | -0.124               | 39.41                     | 35.67                 |
| 37075              | Graham, NC                | -0.063               | 45.27                     | 63.38                 |
| 37077              | Granville, NC             | 0.506                | 88.09                     | 65.61                 |
| 37079              | Greene, NC                | 0.852                | 95.96                     | 99.24                 |
| 37081              | Guilford, NC              | 0.39                 | 83.32                     | 63.69                 |
| 37083              | Halifax, NC               | 0.797                | 95.22                     | 96.46                 |
| 37085              | Harnett, NC               | 0.156                | 67.53                     | 78.69                 |
| 37087              | Haywood, NC               | -0.136               | 38.27                     | 28.09                 |
| 37089              | Henderson, NC             | -0.476               | 11.37                     | 32.1                  |
| 37091              | Hertford, NC              | 0.976                | 96.94                     | 98.73                 |
| 37093              | Hoke, NC                  | 0.498                | 87.87                     | 89.24                 |
| 37095              | Hyde, NC                  | 0.545                | 89.43                     | 86.27                 |
| 37097              | Iredell, NC               | -0.182               | 33.75                     | 37.45                 |
| 37099              | Jackson, NC               | 0.334                | 80.13                     | 62.36                 |
| 37101              | Johnston, NC              | 0.034                | 55.27                     | 53.95                 |
| 37103              | Jones, NC                 | 0.271                | 76                        | 87.61                 |
| 37105              | Lee, NC                   | 0.04                 | 55.84                     | 84.81                 |
| 37107              | Lenoir, NC                | 0.522                | 88.47                     | 99.33                 |
| 37109              | Lincoln, NC               | -0.098               | 41.93                     | 35.64                 |
| 37111              | McDowell, NC              | 0.05                 | 57.12                     | 78.95                 |
| 37113              | Macon, NC                 | -0.364               | 18.18                     | 35.48                 |
| 37115              | Madison, NC               | 0.034                | 55.2                      | 45.86                 |
| 37117              | Martin, NC                | 0.457                | 85.86                     | 75.41                 |
| 37119              | Mecklenburg, NC           | 0.213                | 71.98                     | 44.08                 |
| 37121              | Mitchell, NC              | -0.02                | 50.05                     | 42.23                 |
| 37123              | Montgomery, NC            | -0.164               | 35.34                     | 87.13                 |
| 37125              | Moore, NC                 | -0.352               | 19.2                      | 36.21                 |
| 37127              | Nash, NC                  | 0.133                | 64.6                      | 82.87                 |
| 37129              | New Hanover, NC           | 0.343                | 80.9                      | 37.71                 |
| 37131              | Northampton, NC           | 0.776                | 95                        | 90.22                 |
| 37133              | Onslow, NC                | 0.653                | 92.77                     | 74.65                 |
| 37135              | Orange, NC                | 0.084                | 60.52                     | 29.59                 |
| 37137              | Pamlico, NC               | -0.291               | 24.04                     | 71.62                 |
| 37139              | Pasquotank, NC            | 0.463                | 86.28                     | 77.48                 |
| 37141              | Pender, NC                | -0.268               | 26.04                     | 54.78                 |
| 37143              | Perquimans, NC            | -0.214               | 30.72                     | 50.48                 |
| 37145              | Person, NC                | 0.074                | 59.34                     | 77.32                 |
| 37147              | Pitt, NC                  | 0.675                | 93.31                     | 82.42                 |
| 37149              | Polk, NC                  | -0.558               | 8.02                      | 38.25                 |
| 37151              | Randolph, NC              | -0.016               | 50.56                     | 69.65                 |
| 37153              | Richmond, NC              | 0.578                | 90.64                     | 97.96                 |
| 37155              | Robeson, NC               | 0.565                | 90.23                     | 99.11                 |
| 37157              | Rockingham, NC            | 0.145                | 66.28                     | 78.57                 |
| 37159              | Rowan, NC                 | 0.163                | 68.32                     | 81.43                 |
| 37161              | Rutherford, NC            | 0.171                | 68.93                     | 75.51                 |



| County FIPS | County Description | DOS-SVI Index | DOS-SVI Percentile | SVI Percentile |
|-------------|--------------------|---------------|--------------------|----------------|
| 37163       | Sampson, NC        | 0.016         | 53.3               | 97.23          |
| 37165       | Scotland, NC       | 0.791         | 95.16              | 99.36          |
| 37167       | Stanly, NC         | -0.05         | 46.64              | 63.25          |
| 37169       | Stokes, NC         | 0.035         | 55.37              | 30.67          |
| 37171       | Surry, NC          | -0.148        | 37.06              | 72.58          |
| 37173       | Swain, NC          | 0.041         | 56                 | 77.74          |
| 37175       | Transylvania, NC   | -0.21         | 31.01              | 39.75          |
| 37177       | Tyrrell, NC        | 0.96          | 96.91              | 87.64          |
| 37179       | Union, NC          | -0.516        | 9.65               | 18.73          |
| 37181       | Vance, NC          | 0.487         | 87.39              | 97.87          |
| 37183       | Wake, NC           | -0.027        | 49.09              | 27.74          |
| 37185       | Warren, NC         | 0.398         | 83.67              | 89.43          |
| 37187       | Washington, NC     | 0.854         | 95.99              | 87.87          |
| 37189       | Watauga, NC        | 0.696         | 93.66              | 41.21          |
| 37191       | Wayne, NC          | 0.382         | 82.78              | 95.03          |
| 37193       | Wilkes, NC         | 0.082         | 60.3               | 69.24          |
| 37195       | Wilson, NC         | 0.336         | 80.45              | 93.6           |
| 37197       | Yadkin, NC         | -0.151        | 36.9               | 64.04          |
| 37199       | Yancey, NC         | -0.037        | 47.88              | 57.36          |
| 38001       | Adams, ND          | -0.447        | 12.73              | 2.99           |
| 38003       | Barnes, ND         | -0.084        | 43.23              | 12.45          |
| 38005       | Benson, ND         | -0.128        | 38.78              | 84.33          |
| 38007       | Billings, ND       | -0.511        | 9.84               | 3.12           |
| 38009       | Bottineau, ND      | -0.315        | 22.45              | 6.91           |
| 38011       | Bowman, ND         | -0.755        | 3.53               | 17.55          |
| 38013       | Burke, ND          | -1.004        | 1.59               | 0.7            |
| 38015       | Burleigh, ND       | -0.041        | 47.47              | 17.39          |
| 38017       | Cass, ND           | 0.397         | 83.64              | 14.27          |
| 38019       | Cavalier, ND       | -0.757        | 3.5                | 1.72           |
| 38021       | Dickey, ND         | -0.62         | 6.11               | 11.59          |
| 38023       | Divide, ND         | -0.222        | 30.05              | 3.34           |
| 38025       | Dunn, ND           | -0.735        | 3.76               | 22.26          |
| 38027       | Eddy, ND           | 0.256         | 74.98              | 29.04          |
| 38029       | Emmons, ND         | -0.324        | 21.62              | 9.55           |
| 38031       | Foster, ND         | -0.551        | 8.44               | 1.75           |
| 38033       | Golden Valley, ND  | -0.487        | 10.86              | 9.3            |
| 38035       | Grand Forks, ND    | 0.619         | 91.66              | 30.29          |
| 38037       | Grant, ND          | -0.837        | 2.61               | 7.1            |
| 38039       | Griggs, ND         | -0.109        | 40.75              | 7.32           |
| 38041       | Hettinger, ND      | -0.006        | 51.29              | 5.61           |
| 38043       | Kidder, ND         | -0.549        | 8.47               | 2.9            |
| 38045       | LaMoure, ND        | -0.625        | 6.02               | 4.43           |
| 38047       | Logan, ND          | -0.846        | 2.55               | 3.82           |
| 38049       | McHenry, ND        | -0.371        | 17.64              | 2.96           |
| 38051       | McIntosh, ND       | -0.104        | 41.16              | 10.61          |
| 38053       | McKenzie, ND       | -0.806        | 3.02               | 39.2           |
| 38055       | McLean, ND         | -0.553        | 8.34               | 8.34           |
| 38057       | Mercer, ND         | -0.682        | 4.65               | 10.16          |
| 38059       | Morton, ND         | -0.412        | 14.45              | 10.35          |
| 38061       | Mountrail, ND      | -0.726        | 3.82               | 37.58          |
| 38063       | Nelson, ND         | -0.495        | 10.44              | 3.5            |
| 38065       | Oliver, ND         | -0.6          | 6.65               | 21.08          |
| 38067       | Pembina, ND        | -0.44         | 12.99              | 4.17           |
| 38069       | Pierce, ND         | 0.141         | 65.65              | 19.14          |
| 38071       | Ramsey, ND         | 0.047         | 56.7               | 35.32          |

| <b>County FIPS</b> | <b>County Description</b> | <b>DOS-SVI Index</b> | <b>DOS-SVI Percentile</b> | <b>SVI Percentile</b> |
|--------------------|---------------------------|----------------------|---------------------------|-----------------------|
| 38073              | Ransom, ND                | -0.026               | 49.28                     | 8.57                  |
| 38075              | Renville, ND              | -0.609               | 6.3                       | 2.8                   |
| 38077              | Richland, ND              | 0.202                | 71                        | 12.17                 |
| 38079              | Rolette, ND               | 0.726                | 94.17                     | 90.7                  |
| 38081              | Sargent, ND               | -0.576               | 7.61                      | 2.32                  |
| 38083              | Sheridan, ND              | -0.247               | 27.83                     | 7.42                  |
| 38085              | Sioux, ND                 | -0.038               | 47.79                     | 88.44                 |
| 38087              | Slope, ND                 | -0.683               | 4.58                      | 1.37                  |
| 38089              | Stark, ND                 | -0.307               | 23.08                     | 21.4                  |
| 38091              | Steele, ND                | -0.885               | 2.29                      | 0.19                  |
| 38093              | Stutsman, ND              | 0.22                 | 72.53                     | 24.24                 |
| 38095              | Towner, ND                | -0.833               | 2.71                      | 19.46                 |
| 38097              | Traill, ND                | -0.189               | 33.02                     | 9.27                  |
| 38099              | Walsh, ND                 | -0.085               | 43.01                     | 36.82                 |
| 38101              | Ward, ND                  | -0.162               | 35.5                      | 16.78                 |
| 38103              | Wells, ND                 | -0.563               | 7.9                       | 6.11                  |
| 38105              | Williams, ND              | -0.194               | 32.54                     | 25.1                  |
| 39001              | Adams, OH                 | 0.386                | 83                        | 77.04                 |
| 39003              | Allen, OH                 | 0.425                | 84.62                     | 57.93                 |
| 39005              | Ashland, OH               | -0.09                | 42.44                     | 43.34                 |
| 39007              | Ashtabula, OH             | 0.302                | 78.35                     | 78.57                 |
| 39009              | Athens, OH                | 1.068                | 97.77                     | 73.25                 |
| 39011              | Auglaize, OH              | -0.226               | 29.67                     | 5.35                  |
| 39013              | Belmont, OH               | 0.322                | 79.56                     | 35.96                 |
| 39015              | Brown, OH                 | 0.041                | 55.97                     | 40.48                 |
| 39017              | Butler, OH                | 0.15                 | 66.95                     | 36.18                 |
| 39019              | Carroll, OH               | -0.158               | 36.07                     | 15.38                 |
| 39021              | Champaign, OH             | 0.024                | 54.22                     | 29.78                 |
| 39023              | Clark, OH                 | 0.368                | 82.2                      | 72.71                 |
| 39025              | Clermont, OH              | -0.102               | 41.42                     | 10.29                 |
| 39027              | Clinton, OH               | 0.133                | 64.69                     | 44.24                 |
| 39029              | Columbiana, OH            | 0.028                | 54.6                      | 48.54                 |
| 39031              | Coshocton, OH             | -0.163               | 35.44                     | 62.07                 |
| 39033              | Crawford, OH              | 0.278                | 76.63                     | 31.91                 |
| 39035              | Cuyahoga, OH              | 0.544                | 89.4                      | 68.09                 |
| 39037              | Darke, OH                 | -0.168               | 34.99                     | 13.47                 |
| 39039              | Defiance, OH              | -0.01                | 51.03                     | 21.66                 |
| 39041              | Delaware, OH              | -0.543               | 8.72                      | 1.66                  |
| 39043              | Erie, OH                  | 0.163                | 68.26                     | 29.14                 |
| 39045              | Fairfield, OH             | -0.095               | 42.12                     | 23.54                 |
| 39047              | Fayette, OH               | 0.403                | 83.86                     | 50.16                 |
| 39049              | Franklin, OH              | 0.334                | 80.33                     | 51.24                 |
| 39051              | Fulton, OH                | -0.168               | 34.96                     | 17.77                 |
| 39053              | Gallia, OH                | 0.121                | 63.61                     | 66.4                  |
| 39055              | Geauga, OH                | -0.941               | 1.94                      | 9.01                  |
| 39057              | Greene, OH                | 0.19                 | 70.33                     | 20.76                 |
| 39059              | Guernsey, OH              | 0.317                | 79.31                     | 67.07                 |
| 39061              | Hamilton, OH              | 0.358                | 81.79                     | 53.69                 |
| 39063              | Hancock, OH               | 0.042                | 56.1                      | 21.11                 |
| 39065              | Hardin, OH                | 0.184                | 69.79                     | 47.1                  |
| 39067              | Harrison, OH              | -0.043               | 47.34                     | 51.94                 |
| 39069              | Henry, OH                 | 0.141                | 65.68                     | 15.57                 |
| 39071              | Highland, OH              | 0.196                | 70.61                     | 68.98                 |
| 39073              | Hocking, OH               | 0.009                | 52.63                     | 46.85                 |
| 39075              | Holmes, OH                | -1.233               | 0.64                      | 43.6                  |

| <b>County FIPS</b> | <b>County Description</b> | <b>DOS-SVI Index</b> | <b>DOS-SVI Percentile</b> | <b>SVI Percentile</b> |
|--------------------|---------------------------|----------------------|---------------------------|-----------------------|
| 39077              | Huron, OH                 | 0.07                 | 59.03                     | 43.25                 |
| 39079              | Jackson, OH               | 0.283                | 77.01                     | 77.26                 |
| 39081              | Jefferson, OH             | 0.382                | 82.74                     | 54.94                 |
| 39083              | Knox, OH                  | 0.089                | 60.94                     | 29.43                 |
| 39085              | Lake, OH                  | -0.017               | 50.46                     | 12.93                 |
| 39087              | Lawrence, OH              | 0.293                | 77.71                     | 55.83                 |
| 39089              | Licking, OH               | -0.047               | 46.8                      | 22.9                  |
| 39091              | Logan, OH                 | -0.228               | 29.45                     | 31.69                 |
| 39093              | Lorain, OH                | 0.34                 | 80.64                     | 50.89                 |
| 39095              | Lucas, OH                 | 0.672                | 93.19                     | 68.76                 |
| 39097              | Madison, OH               | 0.387                | 83.16                     | 33.82                 |
| 39099              | Mahoning, OH              | 0.44                 | 85.26                     | 58.89                 |
| 39101              | Marion, OH                | 0.455                | 85.8                      | 64.14                 |
| 39103              | Medina, OH                | -0.394               | 15.66                     | 1.02                  |
| 39105              | Meigs, OH                 | 0.137                | 65.11                     | 67.87                 |
| 39107              | Mercer, OH                | -0.392               | 15.89                     | 5.1                   |
| 39109              | Miami, OH                 | -0.124               | 39.29                     | 11.91                 |
| 39111              | Monroe, OH                | 0.087                | 60.78                     | 44.3                  |
| 39113              | Montgomery, OH            | 0.467                | 86.53                     | 67.26                 |
| 39115              | Morgan, OH                | 0.264                | 75.49                     | 56.59                 |
| 39117              | Morrow, OH                | -0.41                | 14.55                     | 19.2                  |
| 39119              | Muskingum, OH             | 0.273                | 76.19                     | 59.81                 |
| 39121              | Noble, OH                 | 0.27                 | 75.93                     | 42.93                 |
| 39123              | Ottawa, OH                | -0.087               | 42.66                     | 15.41                 |
| 39125              | Paulding, OH              | -0.284               | 24.71                     | 28.85                 |
| 39127              | Perry, OH                 | 0.334                | 80.29                     | 55.45                 |
| 39129              | Pickaway, OH              | 0.217                | 72.33                     | 28.18                 |
| 39131              | Pike, OH                  | 0.217                | 72.21                     | 79.94                 |
| 39133              | Portage, OH               | 0.285                | 77.2                      | 24.55                 |
| 39135              | Preble, OH                | -0.159               | 35.88                     | 16.91                 |
| 39137              | Putnam, OH                | -0.429               | 13.63                     | 1.53                  |
| 39139              | Richland, OH              | 0.244                | 74.05                     | 61.69                 |
| 39141              | Ross, OH                  | 0.534                | 88.98                     | 72.55                 |
| 39143              | Sandusky, OH              | 0.32                 | 79.47                     | 39.87                 |
| 39145              | Scioto, OH                | 0.532                | 88.89                     | 83.47                 |
| 39147              | Seneca, OH                | 0.468                | 86.6                      | 37.55                 |
| 39149              | Shelby, OH                | -0.155               | 36.45                     | 18.92                 |
| 39151              | Stark, OH                 | 0.222                | 72.59                     | 36.66                 |
| 39153              | Summit, OH                | 0.165                | 68.48                     | 33.34                 |
| 39155              | Trumbull, OH              | 0.279                | 76.66                     | 46.4                  |
| 39157              | Tuscarawas, OH            | -0.156               | 36.29                     | 34.43                 |
| 39159              | Union, OH                 | -0.173               | 34.54                     | 7.71                  |
| 39161              | Van Wert, OH              | 0.136                | 64.95                     | 16.97                 |
| 39163              | Vinton, OH                | 0.293                | 77.78                     | 72.29                 |
| 39165              | Warren, OH                | -0.309               | 22.92                     | 4.78                  |
| 39167              | Washington, OH            | 0.171                | 68.89                     | 34.97                 |
| 39169              | Wayne, OH                 | -0.329               | 21.17                     | 47.9                  |
| 39171              | Williams, OH              | 0.064                | 58.42                     | 26.91                 |
| 39173              | Wood, OH                  | 0.208                | 71.31                     | 16.62                 |
| 39175              | Wyandot, OH               | -0.025               | 49.38                     | 22.74                 |
| 40001              | Adair, OK                 | 0.171                | 68.96                     | 89.65                 |
| 40003              | Alfalfa, OK               | 0.396                | 83.51                     | 25.35                 |
| 40005              | Atoka, OK                 | 0.526                | 88.6                      | 80.76                 |
| 40007              | Beaver, OK                | -0.419               | 14.1                      | 45.54                 |
| 40009              | Beckham, OK               | 0.059                | 57.91                     | 71.18                 |

| <b>County FIPS</b> | <b>County Description</b> | <b>DOS-SVI Index</b> | <b>DOS-SVI Percentile</b> | <b>SVI Percentile</b> |
|--------------------|---------------------------|----------------------|---------------------------|-----------------------|
| 40011              | Blaine, OK                | 0.396                | 83.54                     | 66.78                 |
| 40013              | Bryan, OK                 | -0.086               | 42.82                     | 81.27                 |
| 40015              | Caddo, OK                 | 0.059                | 57.88                     | 94.59                 |
| 40017              | Canadian, OK              | -0.299               | 23.72                     | 26.21                 |
| 40019              | Carter, OK                | 0.061                | 58.13                     | 79.14                 |
| 40021              | Cherokee, OK              | 0.217                | 72.3                      | 92.71                 |
| 40023              | Choctaw, OK               | 0.474                | 86.85                     | 96.02                 |
| 40025              | Cimarron, OK              | -0.372               | 17.51                     | 44.75                 |
| 40027              | Cleveland, OK             | 0.16                 | 68                        | 34.36                 |
| 40029              | Coal, OK                  | 0.184                | 69.82                     | 82.55                 |
| 40031              | Comanche, OK              | 0.533                | 88.95                     | 83.54                 |
| 40033              | Cotton, OK                | 0.021                | 54.03                     | 67.42                 |
| 40035              | Craig, OK                 | 0.642                | 92.39                     | 85.38                 |
| 40037              | Creek, OK                 | -0.181               | 33.81                     | 49.01                 |
| 40039              | Custer, OK                | 0.026                | 54.38                     | 75.03                 |
| 40041              | Delaware, OK              | -0.061               | 45.62                     | 76.97                 |
| 40043              | Dewey, OK                 | -0.269               | 25.82                     | 22.48                 |
| 40045              | Ellis, OK                 | -0.034               | 48.3                      | 30.19                 |
| 40047              | Garfield, OK              | 0.06                 | 57.98                     | 59.08                 |
| 40049              | Garvin, OK                | -0.063               | 45.3                      | 51.15                 |
| 40051              | Grady, OK                 | -0.252               | 27.35                     | 30.8                  |
| 40053              | Grant, OK                 | -0.067               | 45.02                     | 16.34                 |
| 40055              | Greer, OK                 | 1.432                | 99.33                     | 77.42                 |
| 40057              | Harmon, OK                | 0.252                | 74.66                     | 81.08                 |
| 40059              | Harper, OK                | -0.6                 | 6.69                      | 31.85                 |
| 40061              | Haskell, OK               | -0.142               | 37.76                     | 87.36                 |
| 40063              | Hughes, OK                | 0.617                | 91.63                     | 81.15                 |
| 40065              | Jackson, OK               | 0.245                | 74.12                     | 82.26                 |
| 40067              | Jefferson, OK             | 0.464                | 86.34                     | 87.45                 |
| 40069              | Johnston, OK              | 0.205                | 71.19                     | 84.68                 |
| 40071              | Kay, OK                   | 0.08                 | 60.11                     | 84.2                  |
| 40073              | Kingfisher, OK            | -0.288               | 24.36                     | 38.06                 |
| 40075              | Kiowa, OK                 | 0.377                | 82.65                     | 65.45                 |
| 40077              | Latimer, OK               | 0.091                | 61.16                     | 89.36                 |
| 40079              | Le Flore, OK              | 0.363                | 81.98                     | 90.32                 |
| 40081              | Lincoln, OK               | -0.252               | 27.25                     | 47.87                 |
| 40083              | Logan, OK                 | -0.114               | 40.24                     | 29.84                 |
| 40085              | Love, OK                  | -0.278               | 25.18                     | 62.93                 |
| 40087              | McClain, OK               | -0.298               | 23.81                     | 16.24                 |
| 40089              | McCurtain, OK             | 0.009                | 52.66                     | 91.37                 |
| 40091              | McIntosh, OK              | -0.309               | 22.89                     | 78.28                 |
| 40093              | Major, OK                 | -0.518               | 9.46                      | 32.04                 |
| 40095              | Marshall, OK              | 0.013                | 53.04                     | 85.45                 |
| 40097              | Mayes, OK                 | -0.053               | 46.29                     | 75.19                 |
| 40099              | Murray, OK                | -0.079               | 43.78                     | 70.92                 |
| 40101              | Muskogee, OK              | 0.601                | 91.18                     | 93.38                 |
| 40103              | Noble, OK                 | -0.271               | 25.69                     | 33.85                 |
| 40105              | Nowata, OK                | 0.154                | 67.3                      | 58.95                 |
| 40107              | Okfuskee, OK              | 0.381                | 82.71                     | 92.87                 |
| 40109              | Oklahoma, OK              | 0.169                | 68.7                      | 68.18                 |
| 40111              | Okmulgee, OK              | 0.427                | 84.72                     | 86.59                 |
| 40113              | Osage, OK                 | -0.027               | 49.16                     | 62.39                 |
| 40115              | Ottawa, OK                | 0.372                | 82.33                     | 95.76                 |
| 40117              | Pawnee, OK                | -0.234               | 29.04                     | 54.24                 |
| 40119              | Payne, OK                 | 0.527                | 88.7                      | 51.31                 |

| <b>County FIPS</b> | <b>County Description</b> | <b>DOS-SVI Index</b> | <b>DOS-SVI Percentile</b> | <b>SVI Percentile</b> |
|--------------------|---------------------------|----------------------|---------------------------|-----------------------|
| 40121              | Pittsburg, OK             | 0.251                | 74.63                     | 82.64                 |
| 40123              | Pontotoc, OK              | 0.25                 | 74.53                     | 65                    |
| 40125              | Pottawatomic, OK          | 0.19                 | 70.42                     | 78.15                 |
| 40127              | Pushmataha, OK            | -0.201               | 31.55                     | 78.63                 |
| 40129              | Roger Mills, OK           | -0.028               | 49.03                     | 40.03                 |
| 40131              | Rogers, OK                | -0.251               | 27.41                     | 28.34                 |
| 40133              | Seminole, OK              | 0.247                | 74.24                     | 92.9                  |
| 40135              | Sequoyah, OK              | 0.125                | 63.96                     | 91.59                 |
| 40137              | Stephens, OK              | 0.142                | 65.81                     | 60.51                 |
| 40139              | Texas, OK                 | -0.422               | 13.95                     | 82.1                  |
| 40141              | Tillman, OK               | 0.049                | 56.96                     | 87.1                  |
| 40143              | Tulsa, OK                 | 0.148                | 66.6                      | 61.59                 |
| 40145              | Wagoner, OK               | -0.258               | 26.84                     | 42.45                 |
| 40147              | Washington, OK            | 0                    | 51.77                     | 43.82                 |
| 40149              | Washita, OK               | -0.179               | 34                        | 40.45                 |
| 40151              | Woods, OK                 | 0.612                | 91.47                     | 31.4                  |
| 40153              | Woodward, OK              | 0.034                | 55.33                     | 57.45                 |
| 41001              | Baker, OR                 | -0.267               | 26.11                     | 68.54                 |
| 41003              | Benton, OR                | 0.177                | 69.44                     | 34.9                  |
| 41005              | Clackamas, OR             | -0.428               | 13.69                     | 18.95                 |
| 41007              | Clatsop, OR               | -0.188               | 33.17                     | 51.85                 |
| 41009              | Columbia, OR              | -0.114               | 40.18                     | 40.25                 |
| 41011              | Coos, OR                  | -0.075               | 44.13                     | 74.3                  |
| 41013              | Crook, OR                 | -0.353               | 19.04                     | 57.29                 |
| 41015              | Curry, OR                 | -0.125               | 39.03                     | 48.79                 |
| 41017              | Deschutes, OR             | -0.361               | 18.43                     | 16.37                 |
| 41019              | Douglas, OR               | -0.135               | 38.36                     | 72.77                 |
| 41021              | Gilliam, OR               | -0.197               | 32.22                     | 50.92                 |
| 41023              | Grant, OR                 | -0.291               | 24.16                     | 54.65                 |
| 41025              | Harney, OR                | -0.153               | 36.71                     | 71.08                 |
| 41027              | Hood River, OR            | -0.845               | 2.58                      | 54.55                 |
| 41029              | Jackson, OR               | -0.102               | 41.39                     | 73.54                 |
| 41031              | Jefferson, OR             | -0.055               | 46.04                     | 91.18                 |
| 41033              | Josephine, OR             | -0.391               | 16.01                     | 65.57                 |
| 41035              | Klamath, OR               | -0.044               | 46.99                     | 86.88                 |
| 41037              | Lake, OR                  | 0.075                | 59.41                     | 76.08                 |
| 41039              | Lane, OR                  | 0.18                 | 69.6                      | 64.9                  |
| 41041              | Lincoln, OR               | -0.118               | 39.76                     | 55.22                 |
| 41043              | Linn, OR                  | -0.066               | 45.11                     | 67.9                  |
| 41045              | Malheur, OR               | 0.317                | 79.27                     | 99.65                 |
| 41047              | Marion, OR                | -0.179               | 34.03                     | 85.35                 |
| 41049              | Morrow, OR                | -1.171               | 0.83                      | 76.43                 |
| 41051              | Multnomah, OR             | -0.027               | 49.12                     | 46.75                 |
| 41053              | Polk, OR                  | -0.046               | 46.86                     | 57.77                 |
| 41055              | Sherman, OR               | -0.055               | 46                        | 13.5                  |
| 41057              | Tillamook, OR             | -0.255               | 27.03                     | 65.86                 |
| 41059              | Umatilla, OR              | -0.174               | 34.45                     | 96.88                 |
| 41061              | Union, OR                 | -0.107               | 40.85                     | 67.29                 |
| 41063              | Wallowa, OR               | -0.311               | 22.8                      | 50.32                 |
| 41065              | Wasco, OR                 | -0.08                | 43.59                     | 83.89                 |
| 41067              | Washington, OR            | -0.336               | 20.28                     | 31.94                 |
| 41069              | Wheeler, OR               | -0.035               | 48.11                     | 39.01                 |
| 41071              | Yamhill, OR               | -0.176               | 34.29                     | 66.08                 |
| 42001              | Adams, PA                 | -0.191               | 32.86                     | 21.18                 |
| 42003              | Allegheny, PA             | 0.031                | 55.01                     | 25.06                 |

| <b>County FIPS</b> | <b>County Description</b> | <b>DOS-SVI Index</b> | <b>DOS-SVI Percentile</b> | <b>SVI Percentile</b> |
|--------------------|---------------------------|----------------------|---------------------------|-----------------------|
| 42005              | Armstrong, PA             | -0.074               | 44.22                     | 24.75                 |
| 42007              | Beaver, PA                | -0.038               | 47.76                     | 24.81                 |
| 42009              | Bedford, PA               | -0.235               | 28.91                     | 27.29                 |
| 42011              | Berks, PA                 | 0.11                 | 62.62                     | 61.62                 |
| 42013              | Blair, PA                 | 0.178                | 69.47                     | 39.81                 |
| 42015              | Bradford, PA              | -0.166               | 35.21                     | 34.71                 |
| 42017              | Bucks, PA                 | -0.368               | 17.86                     | 8.31                  |
| 42019              | Butler, PA                | -0.242               | 28.3                      | 7.9                   |
| 42021              | Cambria, PA               | 0.226                | 72.81                     | 48.92                 |
| 42023              | Cameron, PA               | 0.1                  | 61.86                     | 30.06                 |
| 42025              | Carbon, PA                | -0.076               | 43.9                      | 30.48                 |
| 42027              | Centre, PA                | 0.298                | 78.06                     | 28.92                 |
| 42029              | Chester, PA               | -0.454               | 12.32                     | 14.36                 |
| 42031              | Clarion, PA               | 0.184                | 69.91                     | 47.71                 |
| 42033              | Clearfield, PA            | 0.287                | 77.3                      | 60.54                 |
| 42035              | Clinton, PA               | 0.169                | 68.67                     | 48.6                  |
| 42037              | Columbia, PA              | 0.355                | 81.53                     | 27.68                 |
| 42039              | Crawford, PA              | 0.087                | 60.81                     | 50.64                 |
| 42041              | Cumberland, PA            | -0.13                | 38.71                     | 16.15                 |
| 42043              | Dauphin, PA               | 0.148                | 66.54                     | 49.75                 |
| 42045              | Delaware, PA              | 0.026                | 54.31                     | 41.31                 |
| 42047              | Elk, PA                   | -0.084               | 43.14                     | 11.66                 |
| 42049              | Erie, PA                  | 0.367                | 82.14                     | 61.94                 |
| 42051              | Fayette, PA               | 0.213                | 71.95                     | 62.48                 |
| 42053              | Forest, PA                | 1.752                | 99.81                     | 71.15                 |
| 42055              | Franklin, PA              | -0.109               | 40.72                     | 33.73                 |
| 42057              | Fulton, PA                | -0.075               | 44.09                     | 22.01                 |
| 42059              | Greene, PA                | 0.301                | 78.25                     | 43.5                  |
| 42061              | Huntingdon, PA            | 0.374                | 82.49                     | 49.08                 |
| 42063              | Indiana, PA               | 0.13                 | 64.28                     | 54.84                 |
| 42065              | Jefferson, PA             | 0.03                 | 54.95                     | 33.12                 |
| 42067              | Juniata, PA               | -0.315               | 22.41                     | 44.84                 |
| 42069              | Lackawanna, PA            | 0.111                | 62.81                     | 52.52                 |
| 42071              | Lancaster, PA             | -0.311               | 22.83                     | 45.73                 |
| 42073              | Lawrence, PA              | 0.16                 | 68.07                     | 46.94                 |
| 42075              | Lebanon, PA               | -0.182               | 33.78                     | 53.28                 |
| 42077              | Lehigh, PA                | 0.119                | 63.29                     | 63.5                  |
| 42079              | Luzerne, PA               | 0.254                | 74.75                     | 60.89                 |
| 42081              | Lycoming, PA              | 0.287                | 77.36                     | 42.1                  |
| 42083              | McKean, PA                | 0.467                | 86.47                     | 54.62                 |
| 42085              | Mercer, PA                | 0.153                | 67.27                     | 54.2                  |
| 42087              | Mifflin, PA               | -0.079               | 43.74                     | 47.23                 |
| 42089              | Monroe, PA                | -0.002               | 51.51                     | 30.64                 |
| 42091              | Montgomery, PA            | -0.289               | 24.23                     | 16.53                 |
| 42093              | Montour, PA               | -0.196               | 32.35                     | 31.11                 |
| 42095              | Northampton, PA           | -0.024               | 49.63                     | 28.76                 |
| 42097              | Northumberland, PA        | 0.139                | 65.39                     | 50.06                 |
| 42099              | Perry, PA                 | -0.218               | 30.34                     | 10.89                 |
| 42101              | Philadelphia, PA          | 0.548                | 89.53                     | 92.04                 |
| 42103              | Pike, PA                  | -0.164               | 35.37                     | 12.87                 |
| 42105              | Potter, PA                | -0.031               | 48.65                     | 44.17                 |
| 42107              | Schuylkill, PA            | 0.251                | 74.59                     | 45.06                 |
| 42109              | Snyder, PA                | -0.116               | 39.99                     | 22.99                 |
| 42111              | Somerset, PA              | 0.086                | 60.62                     | 42.26                 |
| 42113              | Sullivan, PA              | 0.262                | 75.36                     | 35.76                 |

| <b>County FIPS</b> | <b>County Description</b> | <b>DOS-SVI Index</b> | <b>DOS-SVI Percentile</b> | <b>SVI Percentile</b> |
|--------------------|---------------------------|----------------------|---------------------------|-----------------------|
| 42115              | Susquehanna, PA           | -0.144               | 37.54                     | 20.64                 |
| 42117              | Tioga, PA                 | 0.016                | 53.33                     | 31.53                 |
| 42119              | Union, PA                 | 0.403                | 83.8                      | 36.05                 |
| 42121              | Venango, PA               | 0.099                | 61.7                      | 42.29                 |
| 42123              | Warren, PA                | -0.043               | 47.28                     | 21.34                 |
| 42125              | Washington, PA            | -0.197               | 32.16                     | 16.94                 |
| 42127              | Wayne, PA                 | 0.076                | 59.6                      | 26.31                 |
| 42129              | Westmoreland, PA          | -0.147               | 37.28                     | 13.79                 |
| 42131              | Wyoming, PA               | -0.046               | 46.9                      | 11.21                 |
| 42133              | York, PA                  | -0.052               | 46.42                     | 32.9                  |
| 44001              | Bristol, RI               | -0.107               | 40.91                     | 12.36                 |
| 44003              | Kent, RI                  | -0.116               | 39.89                     | 15.19                 |
| 44005              | Newport, RI               | -0.152               | 36.8                      | 17.9                  |
| 44007              | Providence, RI            | 0.387                | 83.13                     | 75.92                 |
| 44009              | Washington, RI            | -0.154               | 36.58                     | 8.89                  |
| 45001              | Abbeville, SC             | 0.469                | 86.66                     | 85.64                 |
| 45003              | Aiken, SC                 | 0.132                | 64.56                     | 66.66                 |
| 45005              | Allendale, SC             | 1.228                | 98.73                     | 99.3                  |
| 45007              | Anderson, SC              | 0.036                | 55.49                     | 70.1                  |
| 45009              | Bamberg, SC               | 1.008                | 97.23                     | 95.16                 |
| 45011              | Barnwell, SC              | 0.576                | 90.51                     | 99.04                 |
| 45013              | Beaufort, SC              | -0.124               | 39.38                     | 40.06                 |
| 45015              | Berkeley, SC              | 0.145                | 66.19                     | 51.46                 |
| 45017              | Calhoun, SC               | -0.076               | 43.97                     | 56.27                 |
| 45019              | Charleston, SC            | 0.135                | 64.85                     | 31.56                 |
| 45021              | Cherokee, SC              | 0.231                | 73.07                     | 69.78                 |
| 45023              | Chester, SC               | 0.172                | 68.99                     | 73.63                 |
| 45025              | Chesterfield, SC          | 0.034                | 55.3                      | 94.87                 |
| 45027              | Clarendon, SC             | 0.383                | 82.97                     | 97.93                 |
| 45029              | Colleton, SC              | 0.389                | 83.22                     | 80                    |
| 45031              | Darlington, SC            | 0.375                | 82.52                     | 92.68                 |
| 45033              | Dillon, SC                | 0.63                 | 91.91                     | 96.82                 |
| 45035              | Dorchester, SC            | 0.134                | 64.76                     | 41.88                 |
| 45037              | Edgefield, SC             | 0.543                | 89.37                     | 84.84                 |
| 45039              | Fairfield, SC             | 0.303                | 78.42                     | 74.84                 |
| 45041              | Florence, SC              | 0.376                | 82.55                     | 89.87                 |
| 45043              | Georgetown, SC            | 0.121                | 63.64                     | 67.71                 |
| 45045              | Greenville, SC            | -0.024               | 49.54                     | 50.38                 |
| 45047              | Greenwood, SC             | 0.592                | 90.93                     | 93.44                 |
| 45049              | Hampton, SC               | 0.557                | 89.88                     | 80.32                 |
| 45051              | Horry, SC                 | 0.415                | 84.24                     | 61.02                 |
| 45053              | Jasper, SC                | 0.269                | 75.8                      | 94.49                 |
| 45055              | Kershaw, SC               | 0.248                | 74.28                     | 49.59                 |
| 45057              | Lancaster, SC             | -0.066               | 45.08                     | 51.21                 |
| 45059              | Laurens, SC               | 0.325                | 79.69                     | 91.72                 |
| 45061              | Lee, SC                   | 0.673                | 93.22                     | 92.1                  |
| 45063              | Lexington, SC             | -0.07                | 44.54                     | 44.2                  |
| 45065              | McCormick, SC             | 0.645                | 92.55                     | 73.73                 |
| 45067              | Marion, SC                | 0.487                | 87.36                     | 92.93                 |
| 45069              | Marlboro, SC              | 0.985                | 97.04                     | 98.69                 |
| 45071              | Newberry, SC              | 0.285                | 77.24                     | 92.32                 |
| 45073              | Oconee, SC                | 0.018                | 53.71                     | 72.93                 |
| 45075              | Orangeburg, SC            | 0.516                | 88.32                     | 92.29                 |
| 45077              | Pickens, SC               | 0.322                | 79.59                     | 59.9                  |
| 45079              | Richland, SC              | 0.812                | 95.48                     | 63.09                 |

| <b>County FIPS</b> | <b>County Description</b> | <b>DOS-SVI Index</b> | <b>DOS-SVI Percentile</b> | <b>SVI Percentile</b> |
|--------------------|---------------------------|----------------------|---------------------------|-----------------------|
| 45081              | Saluda, SC                | 0.045                | 56.45                     | 79.49                 |
| 45083              | Spartanburg, SC           | 0.092                | 61.19                     | 76.18                 |
| 45085              | Sumter, SC                | 0.467                | 86.5                      | 97.32                 |
| 45087              | Union, SC                 | 0.523                | 88.51                     | 86.78                 |
| 45089              | Williamsburg, SC          | 0.56                 | 89.97                     | 97.04                 |
| 45091              | York, SC                  | 0.096                | 61.41                     | 36.62                 |
| 46003              | Aurora, SD                | -0.317               | 22.22                     | 27.26                 |
| 46005              | Beadle, SD                | -0.351               | 19.23                     | 65.06                 |
| 46007              | Bennett, SD               | -0.266               | 26.17                     | 79.27                 |
| 46009              | Bon Homme, SD             | 0.417                | 84.27                     | 23.82                 |
| 46011              | Brookings, SD             | 0.406                | 83.95                     | 15.61                 |
| 46013              | Brown, SD                 | 0.022                | 54.09                     | 32.87                 |
| 46015              | Brule, SD                 | 0.383                | 82.87                     | 57.13                 |
| 46017              | Buffalo, SD               | 0.412                | 84.18                     | 97.1                  |
| 46019              | Butte, SD                 | -0.036               | 47.98                     | 36.27                 |
| 46021              | Campbell, SD              | -1.075               | 1.24                      | 0.64                  |
| 46023              | Charles Mix, SD           | -0.122               | 39.51                     | 73.89                 |
| 46025              | Clark, SD                 | -0.417               | 14.2                      | 17.1                  |
| 46027              | Clay, SD                  | 1.081                | 97.9                      | 24.68                 |
| 46029              | Codington, SD             | -0.116               | 39.95                     | 24.49                 |
| 46031              | Corson, SD                | 0.349                | 81.22                     | 83.95                 |
| 46033              | Custer, SD                | -0.257               | 26.93                     | 22.8                  |
| 46035              | Davison, SD               | 0.223                | 72.75                     | 23.38                 |
| 46037              | Day, SD                   | 0.17                 | 68.83                     | 18.5                  |
| 46039              | Deuel, SD                 | -0.462               | 11.84                     | 8.22                  |
| 46041              | Dewey, SD                 | -0.33                | 21.01                     | 88.31                 |
| 46043              | Douglas, SD               | -0.784               | 3.22                      | 15.03                 |
| 46045              | Edmunds, SD               | -0.583               | 7.26                      | 3.41                  |
| 46047              | Fall River, SD            | -0.047               | 46.77                     | 41.72                 |
| 46049              | Faulk, SD                 | 0.03                 | 54.92                     | 7.77                  |
| 46051              | Grant, SD                 | -0.191               | 32.79                     | 5.51                  |
| 46053              | Gregory, SD               | -0.164               | 35.31                     | 28.47                 |
| 46055              | Haakon, SD                | -0.058               | 45.78                     | 36.24                 |
| 46057              | Hamlin, SD                | -0.697               | 4.14                      | 15.86                 |
| 46059              | Hand, SD                  | -0.258               | 26.77                     | 3.09                  |
| 46061              | Hanson, SD                | -0.555               | 8.25                      | 0.13                  |
| 46063              | Harding, SD               | -0.576               | 7.58                      | 8.28                  |
| 46065              | Hughes, SD                | -0.237               | 28.75                     | 40.61                 |
| 46067              | Hutchinson, SD            | -0.36                | 18.56                     | 24.87                 |
| 46069              | Hyde, SD                  | -0.602               | 6.59                      | 9.43                  |
| 46071              | Jackson, SD               | 0.047                | 56.8                      | 96.66                 |
| 46073              | Jerauld, SD               | -0.722               | 3.85                      | 5.06                  |
| 46075              | Jones, SD                 | -0.302               | 23.4                      | 0.51                  |
| 46077              | Kingsbury, SD             | -0.313               | 22.73                     | 2.23                  |
| 46079              | Lake, SD                  | -0.39                | 16.08                     | 19.65                 |
| 46081              | Lawrence, SD              | 0.027                | 54.54                     | 26.18                 |
| 46083              | Lincoln, SD               | -0.395               | 15.6                      | 2.01                  |
| 46085              | Lyman, SD                 | -0.172               | 34.58                     | 71.37                 |
| 46087              | McCook, SD                | -0.298               | 23.78                     | 22.29                 |
| 46089              | McPherson, SD             | 0.03                 | 54.73                     | 28.89                 |
| 46091              | Marshall, SD              | -0.503               | 10.16                     | 21.31                 |
| 46093              | Meade, SD                 | -0.228               | 29.42                     | 8.92                  |
| 46095              | Mellette, SD              | 0.048                | 56.89                     | 91.56                 |
| 46097              | Miner, SD                 | -0.694               | 4.27                      | 10.57                 |
| 46099              | Minnehaha, SD             | 0.193                | 70.55                     | 35.89                 |



| <b>County FIPS</b> | <b>County Description</b> | <b>DOS-SVI Index</b> | <b>DOS-SVI Percentile</b> | <b>SVI Percentile</b> |
|--------------------|---------------------------|----------------------|---------------------------|-----------------------|
| 46101              | Moody, SD                 | 0.013                | 53.07                     | 39.08                 |
| 46102              | Oglala Lakota, SD         | -2.499               | 0.22                      | 99.43                 |
| 46103              | Pennington, SD            | 0.116                | 63.16                     | 41.62                 |
| 46105              | Perkins, SD               | -0.407               | 14.71                     | 10.96                 |
| 46107              | Potter, SD                | -0.529               | 9.14                      | 5.16                  |
| 46109              | Roberts, SD               | 0.294                | 77.84                     | 71.78                 |
| 46111              | Sanborn, SD               | -0.198               | 32.03                     | 3.85                  |
| 46115              | Spink, SD                 | -0.273               | 25.57                     | 17.68                 |
| 46117              | Stanley, SD               | -0.394               | 15.73                     | 10.99                 |
| 46119              | Sully, SD                 | -0.687               | 4.49                      | 0.73                  |
| 46121              | Todd, SD                  | 0.561                | 90                        | 95.64                 |
| 46123              | Tripp, SD                 | 0.305                | 78.57                     | 34.11                 |
| 46125              | Turner, SD                | -0.141               | 37.98                     | 10.8                  |
| 46127              | Union, SD                 | -0.246               | 27.86                     | 2.74                  |
| 46129              | Walworth, SD              | -0.605               | 6.5                       | 39.39                 |
| 46135              | Yankton, SD               | 0.403                | 83.83                     | 31.59                 |
| 46137              | Ziebach, SD               | -0.314               | 22.64                     | 95.38                 |
| 47001              | Anderson, TN              | 0.162                | 68.13                     | 60.64                 |
| 47003              | Bedford, TN               | -0.114               | 40.21                     | 77.58                 |
| 47005              | Benton, TN                | 0.208                | 71.28                     | 70.29                 |
| 47007              | Bledsoe, TN               | 0.383                | 82.84                     | 81.59                 |
| 47009              | Blount, TN                | -0.159               | 35.91                     | 24.52                 |
| 47011              | Bradley, TN               | 0.087                | 60.71                     | 69.14                 |
| 47013              | Campbell, TN              | 0.493                | 87.65                     | 73.38                 |
| 47015              | Cannon, TN                | -0.106               | 40.97                     | 37.04                 |
| 47017              | Carroll, TN               | 0.282                | 76.92                     | 74.43                 |
| 47019              | Carter, TN                | 0.43                 | 84.81                     | 61.53                 |
| 47021              | Cheatham, TN              | -0.021               | 49.95                     | 23.69                 |
| 47023              | Chester, TN               | 0.503                | 88.06                     | 64.36                 |
| 47025              | Claiborne, TN             | 0.446                | 85.48                     | 71.02                 |
| 47027              | Clay, TN                  | 0.272                | 76.06                     | 59.39                 |
| 47029              | Cocke, TN                 | 0.554                | 89.81                     | 68.57                 |
| 47031              | Coffee, TN                | -0.118               | 39.8                      | 49.14                 |
| 47033              | Crockett, TN              | -0.046               | 46.83                     | 78.12                 |
| 47035              | Cumberland, TN            | -0.051               | 46.48                     | 53.73                 |
| 47037              | Davidson, TN              | 0.356                | 81.57                     | 53.63                 |
| 47039              | Decatur, TN               | 0.139                | 65.3                      | 50.86                 |
| 47041              | DeKalb, TN                | -0.069               | 44.63                     | 43.06                 |
| 47043              | Dickson, TN               | -0.169               | 34.89                     | 42.9                  |
| 47045              | Dyer, TN                  | 0.383                | 82.94                     | 75.96                 |
| 47047              | Fayette, TN               | -0.032               | 48.58                     | 25.54                 |
| 47049              | Fentress, TN              | 0.015                | 53.23                     | 63.73                 |
| 47051              | Franklin, TN              | 0.106                | 62.3                      | 37.64                 |
| 47053              | Gibson, TN                | 0.364                | 82.08                     | 73.5                  |
| 47055              | Giles, TN                 | 0.084                | 60.43                     | 60.32                 |
| 47057              | Grainger, TN              | -0.105               | 41.04                     | 59.3                  |
| 47059              | Greene, TN                | 0.192                | 70.45                     | 54.46                 |
| 47061              | Grundy, TN                | 0.348                | 81.15                     | 86.85                 |
| 47063              | Hamblen, TN               | 0.064                | 58.45                     | 81.46                 |
| 47065              | Hamilton, TN              | 0.151                | 67.02                     | 41.37                 |
| 47067              | Hancock, TN               | 0.471                | 86.72                     | 76.66                 |
| 47069              | Hardeman, TN              | 1.126                | 98.22                     | 86.72                 |
| 47071              | Hardin, TN                | 0.177                | 69.37                     | 70.64                 |
| 47073              | Hawkins, TN               | 0.243                | 73.86                     | 70.8                  |
| 47075              | Haywood, TN               | 0.42                 | 84.43                     | 87.17                 |

| <b>County FIPS</b> | <b>County Description</b> | <b>DOS-SVI Index</b> | <b>DOS-SVI Percentile</b> | <b>SVI Percentile</b> |
|--------------------|---------------------------|----------------------|---------------------------|-----------------------|
| 47077              | Henderson, TN             | 0.002                | 51.89                     | 69.81                 |
| 47079              | Henry, TN                 | 0.295                | 77.94                     | 63.47                 |
| 47081              | Hickman, TN               | 0.313                | 79.05                     | 56.62                 |
| 47083              | Houston, TN               | 0.056                | 57.75                     | 55.51                 |
| 47085              | Humphreys, TN             | -0.019               | 50.21                     | 36.88                 |
| 47087              | Jackson, TN               | 0.21                 | 71.63                     | 60                    |
| 47089              | Jefferson, TN             | -0.072               | 44.35                     | 56.08                 |
| 47091              | Johnson, TN               | 0.481                | 87.14                     | 56.53                 |
| 47093              | Knox, TN                  | 0.208                | 71.35                     | 30.35                 |
| 47095              | Lake, TN                  | 2.258                | 100                       | 91.85                 |
| 47097              | Lauderdale, TN            | 0.95                 | 96.88                     | 96.72                 |
| 47099              | Lawrence, TN              | 0.03                 | 54.82                     | 83.18                 |
| 47101              | Lewis, TN                 | 0.121                | 63.48                     | 63.63                 |
| 47103              | Lincoln, TN               | 0.02                 | 53.84                     | 67.77                 |
| 47105              | Loudon, TN                | -0.537               | 9.01                      | 38.63                 |
| 47107              | McMinn, TN                | 0.149                | 66.92                     | 65.51                 |
| 47109              | McNairy, TN               | 0.142                | 65.87                     | 71.72                 |
| 47111              | Macon, TN                 | 0.322                | 79.53                     | 69.27                 |
| 47113              | Madison, TN               | 0.459                | 85.99                     | 71.24                 |
| 47115              | Marion, TN                | 0.126                | 64.09                     | 50.61                 |
| 47117              | Marshall, TN              | 0.21                 | 71.57                     | 60.99                 |
| 47119              | Maury, TN                 | -0.016               | 50.49                     | 39.49                 |
| 47121              | Meigs, TN                 | -0.2                 | 31.84                     | 49.33                 |
| 47123              | Monroe, TN                | -0.124               | 39.26                     | 64.78                 |
| 47125              | Montgomery, TN            | 0.344                | 80.96                     | 51.72                 |
| 47127              | Moore, TN                 | -0.456               | 12.16                     | 9.14                  |
| 47129              | Morgan, TN                | 0.644                | 92.49                     | 74.94                 |
| 47131              | Obion, TN                 | 0.31                 | 78.92                     | 76.94                 |
| 47133              | Overton, TN               | -0.073               | 44.32                     | 45.76                 |
| 47135              | Perry, TN                 | 0.012                | 52.95                     | 67.99                 |
| 47137              | Pickett, TN               | -0.26                | 26.58                     | 41.53                 |
| 47139              | Polk, TN                  | -0.067               | 44.95                     | 49.04                 |
| 47141              | Putnam, TN                | 0.455                | 85.83                     | 61.82                 |
| 47143              | Rhea, TN                  | 0.272                | 76.12                     | 82.07                 |
| 47145              | Roane, TN                 | -0.221               | 30.12                     | 38.44                 |
| 47147              | Robertson, TN             | -0.125               | 39.13                     | 42.87                 |
| 47149              | Rutherford, TN            | 0.101                | 61.99                     | 32.68                 |
| 47151              | Scott, TN                 | 0.798                | 95.26                     | 76.37                 |
| 47153              | Sequatchie, TN            | -0.051               | 46.51                     | 57.2                  |
| 47155              | Sevier, TN                | 0.011                | 52.75                     | 61.11                 |
| 47157              | Shelby, TN                | 0.582                | 90.73                     | 78.47                 |
| 47159              | Smith, TN                 | 0.03                 | 54.7                      | 26.08                 |
| 47161              | Stewart, TN               | 0.032                | 55.05                     | 40.86                 |
| 47163              | Sullivan, TN              | 0.145                | 66.25                     | 54.11                 |
| 47165              | Sumner, TN                | -0.075               | 44.19                     | 20.57                 |
| 47167              | Tipton, TN                | 0.158                | 67.69                     | 45                    |
| 47169              | Trousdale, TN             | 0.549                | 89.65                     | 52.2                  |
| 47171              | Unicoi, TN                | 0.493                | 87.68                     | 79.81                 |
| 47173              | Union, TN                 | -0.01                | 51                        | 66.72                 |
| 47175              | Van Buren, TN             | -0.142               | 37.66                     | 60.25                 |
| 47177              | Warren, TN                | 0.373                | 82.39                     | 83.22                 |
| 47179              | Washington, TN            | 0.329                | 79.97                     | 45.89                 |
| 47181              | Wayne, TN                 | 0.431                | 84.94                     | 76.24                 |
| 47183              | Weakley, TN               | 0.53                 | 88.76                     | 65.83                 |
| 47185              | White, TN                 | 0.035                | 55.43                     | 59.84                 |

| County FIPS | County Description | DOS-SVI Index | DOS-SVI Percentile | SVI Percentile |
|-------------|--------------------|---------------|--------------------|----------------|
| 47187       | Williamson, TN     | -0.696        | 4.17               | 2.1            |
| 47189       | Wilson, TN         | -0.2          | 31.8               | 14.65          |
| 48001       | Anderson, TX       | 0.707         | 93.95              | 79.46          |
| 48003       | Andrews, TX        | -1.28         | 0.6                | 47.36          |
| 48005       | Angelina, TX       | 0.045         | 56.41              | 97.71          |
| 48007       | Aransas, TX        | -0.301        | 23.5               | 80.19          |
| 48009       | Archer, TX         | -0.378        | 16.94              | 8.98           |
| 48011       | Armstrong, TX      | -0.483        | 10.92              | 15.99          |
| 48013       | Atascosa, TX       | -0.687        | 4.46               | 84.97          |
| 48015       | Austin, TX         | -0.835        | 2.64               | 49.36          |
| 48017       | Bailey, TX         | -0.663        | 4.93               | 80.03          |
| 48019       | Bandera, TX        | -0.19         | 32.92              | 50.76          |
| 48021       | Bastrop, TX        | -0.678        | 4.74               | 74.59          |
| 48023       | Baylor, TX         | -0.157        | 36.17              | 15.54          |
| 48025       | Bee, TX            | 0.769         | 94.91              | 96.94          |
| 48027       | Bell, TX           | 0.185         | 70.01              | 80.51          |
| 48029       | Bexar, TX          | 0.193         | 70.52              | 82.58          |
| 48031       | Blanco, TX         | -0.71         | 3.95               | 27.83          |
| 48033       | Borden, TX         | -0.744        | 3.63               | 6.21           |
| 48035       | Bosque, TX         | -0.407        | 14.68              | 61.75          |
| 48037       | Bowie, TX          | 0.267         | 75.68              | 85.29          |
| 48039       | Brazoria, TX       | -0.313        | 22.67              | 51.34          |
| 48041       | Brazos, TX         | 0.59          | 90.89              | 65.32          |
| 48043       | Brewster, TX       | -0.261        | 26.55              | 65.73          |
| 48045       | Briscoe, TX        | -0.038        | 47.82              | 45.64          |
| 48047       | Brooks, TX         | 1.319         | 99.01              | 100            |
| 48049       | Brown, TX          | 0.012         | 52.88              | 62.77          |
| 48051       | Burleson, TX       | -0.81         | 2.9                | 60.8           |
| 48053       | Burnet, TX         | -0.355        | 18.85              | 52.99          |
| 48055       | Caldwell, TX       | -0.221        | 30.09              | 87.32          |
| 48057       | Calhoun, TX        | -0.717        | 3.92               | 86.18          |
| 48059       | Callahan, TX       | -0.393        | 15.79              | 29.68          |
| 48061       | Cameron, TX        | -0.383        | 16.49              | 97.58          |
| 48063       | Camp, TX           | -0.254        | 27.19              | 90.19          |
| 48065       | Carson, TX         | -0.299        | 23.62              | 3.38           |
| 48067       | Cass, TX           | -0.316        | 22.25              | 78.41          |
| 48069       | Castro, TX         | -0.614        | 6.24               | 77.74          |
| 48071       | Chambers, TX       | -0.396        | 15.54              | 41.08          |
| 48073       | Cherokee, TX       | -0.393        | 15.76              | 91.91          |
| 48075       | Childress, TX      | 1.066         | 97.71              | 75             |
| 48077       | Clay, TX           | -0.478        | 11.21              | 31.82          |
| 48079       | Cochran, TX        | -0.397        | 15.51              | 86.08          |
| 48081       | Coke, TX           | -0.095        | 42.09              | 62.04          |
| 48083       | Coleman, TX        | -0.044        | 47.09              | 41.85          |
| 48085       | Collin, TX         | -0.341        | 19.9               | 15.06          |
| 48087       | Collingsworth, TX  | -0.149        | 36.99              | 88.76          |
| 48089       | Colorado, TX       | -0.944        | 1.91               | 68.47          |
| 48091       | Comal, TX          | -0.412        | 14.42              | 23.79          |
| 48093       | Comanche, TX       | -0.371        | 17.61              | 72.64          |
| 48095       | Concho, TX         | 0.617         | 91.59              | 42.83          |
| 48097       | Cooke, TX          | -0.395        | 15.57              | 62.26          |
| 48099       | Coryell, TX        | 0.837         | 95.73              | 78.09          |
| 48101       | Cottle, TX         | 0.211         | 71.76              | 93.63          |
| 48103       | Crane, TX          | -1.137        | 0.92               | 47.39          |
| 48105       | Crockett, TX       | 0.017         | 53.58              | 68.92          |

| <b>County FIPS</b> | <b>County Description</b> | <b>DOS-SVI Index</b> | <b>DOS-SVI Percentile</b> | <b>SVI Percentile</b> |
|--------------------|---------------------------|----------------------|---------------------------|-----------------------|
| 48107              | Crosby, TX                | -0.181               | 33.88                     | 93.95                 |
| 48109              | Culberson, TX             | 0.432                | 84.97                     | 99.71                 |
| 48111              | Dallam, TX                | -0.489               | 10.79                     | 55.03                 |
| 48113              | Dallas, TX                | -0.131               | 38.59                     | 75.38                 |
| 48115              | Dawson, TX                | 0.589                | 90.86                     | 94.75                 |
| 48117              | Deaf Smith, TX            | -0.071               | 44.48                     | 84.11                 |
| 48119              | Delta, TX                 | 0.046                | 56.54                     | 57.04                 |
| 48121              | Denton, TX                | -0.148               | 37.09                     | 22.1                  |
| 48123              | DeWitt, TX                | -0.085               | 42.88                     | 82.29                 |
| 48125              | Dickens, TX               | -0.079               | 43.65                     | 87.96                 |
| 48127              | Dimmit, TX                | -0.081               | 43.46                     | 99.97                 |
| 48129              | Donley, TX                | -0.003               | 51.38                     | 45.25                 |
| 48131              | Duval, TX                 | 0.408                | 84.02                     | 99.94                 |
| 48133              | Eastland, TX              | -0.164               | 35.4                      | 80.67                 |
| 48135              | Ector, TX                 | -0.291               | 24.07                     | 79.24                 |
| 48137              | Edwards, TX               | -0.696               | 4.2                       | 43.85                 |
| 48139              | Ellis, TX                 | -0.463               | 11.75                     | 39.24                 |
| 48141              | El Paso, TX               | 0.122                | 63.71                     | 95.35                 |
| 48143              | Erath, TX                 | 0.185                | 70.04                     | 62.52                 |
| 48145              | Falls, TX                 | 0.265                | 75.55                     | 97.99                 |
| 48147              | Fannin, TX                | -0.084               | 43.2                      | 57.58                 |
| 48149              | Fayette, TX               | -0.446               | 12.8                      | 43.63                 |
| 48151              | Fisher, TX                | -0.367               | 18.05                     | 43.12                 |
| 48153              | Floyd, TX                 | -0.498               | 10.28                     | 82.99                 |
| 48155              | Foard, TX                 | -0.337               | 20.22                     | 47.83                 |
| 48157              | Fort Bend, TX             | -0.5                 | 10.19                     | 28.73                 |
| 48159              | Franklin, TX              | -0.516               | 9.62                      | 52.77                 |
| 48161              | Freestone, TX             | 0.043                | 56.19                     | 84.3                  |
| 48163              | Frio, TX                  | 0.569                | 90.32                     | 98.66                 |
| 48165              | Gaines, TX                | -0.923               | 1.97                      | 68.25                 |
| 48167              | Galveston, TX             | -0.056               | 45.97                     | 58.5                  |
| 48169              | Garza, TX                 | 0.816                | 95.54                     | 72.13                 |
| 48171              | Gillespie, TX             | -0.908               | 2.13                      | 35.73                 |
| 48173              | Glasscock, TX             | -1.176               | 0.8                       | 17.61                 |
| 48175              | Goliad, TX                | -0.242               | 28.34                     | 58.15                 |
| 48177              | Gonzales, TX              | -1.129               | 1.05                      | 89.59                 |
| 48179              | Gray, TX                  | 0.027                | 54.44                     | 84.46                 |
| 48181              | Grayson, TX               | -0.111               | 40.53                     | 65.92                 |
| 48183              | Gregg, TX                 | 0.219                | 72.46                     | 88.25                 |
| 48185              | Grimes, TX                | 0.272                | 76.09                     | 86.02                 |
| 48187              | Guadalupe, TX             | -0.221               | 30.15                     | 43.44                 |
| 48189              | Hale, TX                  | -0.012               | 50.78                     | 93.12                 |
| 48191              | Hall, TX                  | 0.185                | 70.07                     | 95                    |
| 48193              | Hamilton, TX              | -0.262               | 26.39                     | 60.83                 |
| 48195              | Hansford, TX              | -0.367               | 18.02                     | 76.15                 |
| 48197              | Hardeman, TX              | -0.278               | 25.15                     | 72.8                  |
| 48199              | Hardin, TX                | -0.245               | 28.02                     | 25.32                 |
| 48201              | Harris, TX                | -0.041               | 47.53                     | 72.36                 |
| 48203              | Harrison, TX              | -0.268               | 26.01                     | 73.06                 |
| 48205              | Hartley, TX               | 0.14                 | 65.55                     | 53.44                 |
| 48207              | Haskell, TX               | 0.551                | 89.69                     | 97.55                 |
| 48209              | Hays, TX                  | -0.11                | 40.62                     | 49.24                 |
| 48211              | Hemphill, TX              | -0.742               | 3.66                      | 74.27                 |
| 48213              | Henderson, TX             | -0.223               | 29.93                     | 72.01                 |
| 48215              | Hidalgo, TX               | -0.677               | 4.78                      | 97.8                  |

| <b>County FIPS</b> | <b>County Description</b> | <b>DOS-SVI Index</b> | <b>DOS-SVI Percentile</b> | <b>SVI Percentile</b> |
|--------------------|---------------------------|----------------------|---------------------------|-----------------------|
| 48217              | Hill, TX                  | -0.435               | 13.21                     | 87.07                 |
| 48219              | Hockley, TX               | -0.332               | 20.76                     | 90.25                 |
| 48221              | Hood, TX                  | -0.595               | 6.94                      | 26.02                 |
| 48223              | Hopkins, TX               | -0.281               | 24.93                     | 70.67                 |
| 48225              | Houston, TX               | 0.602                | 91.21                     | 91.31                 |
| 48227              | Howard, TX                | 0.616                | 91.56                     | 91.53                 |
| 48229              | Hudspeth, TX              | 0.243                | 73.93                     | 98.25                 |
| 48231              | Hunt, TX                  | -0.234               | 29                        | 83.41                 |
| 48233              | Hutchinson, TX            | 0.029                | 54.63                     | 66.31                 |
| 48235              | Irion, TX                 | -0.441               | 12.93                     | 20.13                 |
| 48237              | Jack, TX                  | 0.018                | 53.68                     | 65.38                 |
| 48239              | Jackson, TX               | -0.817               | 2.8                       | 67.74                 |
| 48241              | Jasper, TX                | -0.065               | 45.15                     | 82.39                 |
| 48243              | Jeff Davis, TX            | -0.776               | 3.38                      | 36.11                 |
| 48245              | Jefferson, TX             | 0.577                | 90.61                     | 85.67                 |
| 48247              | Jim Hogg, TX              | 0.08                 | 59.98                     | 99.17                 |
| 48249              | Jim Wells, TX             | -0.081               | 43.49                     | 92.26                 |
| 48251              | Johnson, TX               | -0.392               | 15.92                     | 50.73                 |
| 48253              | Jones, TX                 | 1.386                | 99.17                     | 63.28                 |
| 48255              | Karnes, TX                | 0.469                | 86.69                     | 84.24                 |
| 48257              | Kaufman, TX               | -0.243               | 28.14                     | 56.91                 |
| 48259              | Kendall, TX               | -0.504               | 10.12                     | 22.83                 |
| 48261              | Kenedy, TX                | -0.807               | 2.96                      | 73.28                 |
| 48263              | Kent, TX                  | -0.453               | 12.35                     | 44.27                 |
| 48265              | Kerr, TX                  | -0.17                | 34.7                      | 69.59                 |
| 48267              | Kimble, TX                | 0.098                | 61.64                     | 58.85                 |
| 48269              | King, TX                  | -0.217               | 30.47                     | 19.55                 |
| 48271              | Kinney, TX                | 0.308                | 78.77                     | 85.61                 |
| 48273              | Kleberg, TX               | 0.313                | 79.11                     | 98.34                 |
| 48275              | Knox, TX                  | -0.059               | 45.65                     | 79.62                 |
| 48277              | Lamar, TX                 | 0.263                | 75.45                     | 83.57                 |
| 48279              | Lamb, TX                  | 0.315                | 79.18                     | 89.75                 |
| 48281              | Lampasas, TX              | -0.142               | 37.7                      | 54.43                 |
| 48283              | La Salle, TX              | -0.332               | 20.73                     | 81.91                 |
| 48285              | Lavaca, TX                | -0.968               | 1.72                      | 68.79                 |
| 48287              | Lee, TX                   | -0.277               | 25.31                     | 67.52                 |
| 48289              | Leon, TX                  | -0.53                | 9.11                      | 61.56                 |
| 48291              | Liberty, TX               | -0.156               | 36.33                     | 94.27                 |
| 48293              | Limestone, TX             | -0.062               | 45.43                     | 95.32                 |
| 48295              | Lipscomb, TX              | -0.422               | 13.98                     | 46.05                 |
| 48297              | Live Oak, TX              | -0.103               | 41.26                     | 69.17                 |
| 48299              | Llano, TX                 | -0.794               | 3.09                      | 46.66                 |
| 48301              | Loving, TX                | -3.423               | 0.13                      | 75.73                 |
| 48303              | Lubbock, TX               | 0.421                | 84.46                     | 74.97                 |
| 48305              | Lynn, TX                  | 0.088                | 60.84                     | 89.08                 |
| 48307              | McCulloch, TX             | 0.251                | 74.56                     | 73.95                 |
| 48309              | McLennan, TX              | 0.339                | 80.58                     | 84.36                 |
| 48311              | McMullen, TX              | -1.491               | 0.41                      | 76.31                 |
| 48313              | Madison, TX               | 0.276                | 76.41                     | 83.76                 |
| 48315              | Marion, TX                | -0.354               | 18.91                     | 68.85                 |
| 48317              | Martin, TX                | -0.911               | 2.07                      | 42.39                 |
| 48319              | Mason, TX                 | -0.121               | 39.6                      | 35.7                  |
| 48321              | Matagorda, TX             | -0.242               | 28.18                     | 90.67                 |
| 48323              | Maverick, TX              | -0.65                | 5.32                      | 97.42                 |
| 48325              | Medina, TX                | -0.114               | 40.15                     | 66.97                 |

| County FIPS | County Description | DOS-SVI Index | DOS-SVI Percentile | SVI Percentile |
|-------------|--------------------|---------------|--------------------|----------------|
| 48327       | Menard, TX         | -0.402        | 15.15              | 58.54          |
| 48329       | Midland, TX        | -0.691        | 4.33               | 47.48          |
| 48331       | Milam, TX          | -0.438        | 13.15              | 76.27          |
| 48333       | Mills, TX          | -0.044        | 47.05              | 76.88          |
| 48335       | Mitchell, TX       | 0.098         | 61.6               | 62.13          |
| 48337       | Montague, TX       | -0.379        | 16.75              | 58.41          |
| 48339       | Montgomery, TX     | -0.513        | 9.74               | 39.14          |
| 48341       | Moore, TX          | -1.002        | 1.62               | 69.9           |
| 48343       | Morris, TX         | -0.305        | 23.27              | 72.99          |
| 48345       | Motley, TX         | -0.63         | 5.92               | 70.03          |
| 48347       | Nacogdoches, TX    | 0.502         | 87.97              | 98.22          |
| 48349       | Navarro, TX        | -0.111        | 40.47              | 96.62          |
| 48351       | Newton, TX         | 0.268         | 75.71              | 72.07          |
| 48353       | Nolan, TX          | -0.509        | 9.9                | 88.66          |
| 48355       | Nueces, TX         | 0.024         | 54.19              | 83.63          |
| 48357       | Ochiltree, TX      | -1.038        | 1.47               | 57.87          |
| 48359       | Oldham, TX         | -0.107        | 40.88              | 43.22          |
| 48361       | Orange, TX         | -0.132        | 38.49              | 58.12          |
| 48363       | Palo Pinto, TX     | -0.31         | 22.86              | 87.99          |
| 48365       | Panola, TX         | -0.226        | 29.64              | 69.52          |
| 48367       | Parker, TX         | -0.655        | 5.16               | 25.61          |
| 48369       | Parmer, TX         | -1.128        | 1.08               | 75.76          |
| 48371       | Pecos, TX          | -0.127        | 38.81              | 82.13          |
| 48373       | Polk, TX           | 0.19          | 70.39              | 91.21          |
| 48375       | Potter, TX         | -0.024        | 49.6               | 92.48          |
| 48377       | Presidio, TX       | -0.693        | 4.3                | 99.81          |
| 48379       | Rains, TX          | -0.657        | 5.03               | 40.16          |
| 48381       | Randall, TX        | -0.181        | 33.84              | 22.04          |
| 48383       | Reagan, TX         | -0.009        | 51.07              | 48.06          |
| 48385       | Real, TX           | -0.03         | 48.71              | 71.69          |
| 48387       | Red River, TX      | 0.109         | 62.5               | 56.5           |
| 48389       | Reeves, TX         | -0.16         | 35.75              | 78.03          |
| 48391       | Refugio, TX        | 0.239         | 73.38              | 94.14          |
| 48393       | Roberts, TX        | -0.286        | 24.39              | 9.11           |
| 48395       | Robertson, TX      | -0.594        | 6.97               | 75.29          |
| 48397       | Rockwall, TX       | -0.621        | 6.08               | 11.24          |
| 48399       | Runnels, TX        | 0.137         | 65.01              | 54.49          |
| 48401       | Rusk, TX           | 0.108         | 62.43              | 79.65          |
| 48403       | Sabine, TX         | -0.098        | 41.83              | 53.09          |
| 48405       | San Augustine, TX  | -0.063        | 45.4               | 88.89          |
| 48407       | San Jacinto, TX    | -0.617        | 6.21               | 68.69          |
| 48409       | San Patricio, TX   | -0.403        | 15.03              | 83.09          |
| 48411       | San Saba, TX       | -0.052        | 46.39              | 73.15          |
| 48413       | Schleicher, TX     | -1.133        | 0.99               | 58.57          |
| 48415       | Scurry, TX         | -0.335        | 20.34              | 69.94          |
| 48417       | Shackelford, TX    | -0.542        | 8.76               | 68.5           |
| 48419       | Shelby, TX         | 0.103         | 62.05              | 95.22          |
| 48421       | Sherman, TX        | -0.46         | 11.97              | 46.11          |
| 48423       | Smith, TX          | -0.126        | 38.94              | 74.62          |
| 48425       | Somervell, TX      | -0.437        | 13.18              | 56.05          |
| 48427       | Starr, TX          | -0.589        | 7.1                | 98.15          |
| 48429       | Stephens, TX       | 0.483         | 87.2               | 88.5           |
| 48431       | Sterling, TX       | 0.63          | 91.94              | 41.27          |
| 48433       | Stonewall, TX      | -0.497        | 10.31              | 32.36          |
| 48435       | Sutton, TX         | -0.631        | 5.89               | 60.41          |

| <b>County FIPS</b> | <b>County Description</b> | <b>DOS-SVI Index</b> | <b>DOS-SVI Percentile</b> | <b>SVI Percentile</b> |
|--------------------|---------------------------|----------------------|---------------------------|-----------------------|
| 48437              | Swisher, TX               | 0.23                 | 73                        | 97.01                 |
| 48439              | Tarrant, TX               | -0.085               | 42.92                     | 54.75                 |
| 48441              | Taylor, TX                | 0.328                | 79.85                     | 69.33                 |
| 48443              | Terrell, TX               | 0.05                 | 57.24                     | 47.13                 |
| 48445              | Terry, TX                 | 0.061                | 58.17                     | 98.76                 |
| 48447              | Throckmorton, TX          | 0.154                | 67.4                      | 26.78                 |
| 48449              | Titus, TX                 | -0.641               | 5.63                      | 89.01                 |
| 48451              | Tom Green, TX             | 0.205                | 71.12                     | 66.43                 |
| 48453              | Travis, TX                | -0.125               | 39.1                      | 38.12                 |
| 48455              | Trinity, TX               | -0.27                | 25.79                     | 80.16                 |
| 48457              | Tyler, TX                 | -0.179               | 34.1                      | 88.34                 |
| 48459              | Upshur, TX                | -0.556               | 8.12                      | 58.98                 |
| 48461              | Upton, TX                 | -0.286               | 24.42                     | 65.19                 |
| 48463              | Uvalde, TX                | -0.011               | 50.84                     | 95.48                 |
| 48465              | Val Verde, TX             | -0.459               | 12                        | 96.78                 |
| 48467              | Van Zandt, TX             | -0.314               | 22.48                     | 55.89                 |
| 48469              | Victoria, TX              | -0.352               | 19.1                      | 78.34                 |
| 48471              | Walker, TX                | 1.141                | 98.34                     | 69.97                 |
| 48473              | Waller, TX                | -0.347               | 19.45                     | 83.31                 |
| 48475              | Ward, TX                  | -0.659               | 5                         | 64.94                 |
| 48477              | Washington, TX            | -0.239               | 28.59                     | 73.12                 |
| 48479              | Webb, TX                  | -0.64                | 5.67                      | 94.97                 |
| 48481              | Wharton, TX               | -0.254               | 27.12                     | 87.58                 |
| 48483              | Wheeler, TX               | -0.447               | 12.7                      | 69.62                 |
| 48485              | Wichita, TX               | 0.653                | 92.74                     | 81.66                 |
| 48487              | Wilbarger, TX             | 0.354                | 81.38                     | 90.83                 |
| 48489              | Willacy, TX               | 0.363                | 82.01                     | 98.92                 |
| 48491              | Williamson, TX            | -0.242               | 28.21                     | 20.16                 |
| 48493              | Wilson, TX                | -0.816               | 2.83                      | 44.36                 |
| 48495              | Winkler, TX               | -0.266               | 26.27                     | 65.41                 |
| 48497              | Wise, TX                  | -0.373               | 17.45                     | 57.68                 |
| 48499              | Wood, TX                  | -0.107               | 40.94                     | 63.22                 |
| 48501              | Yoakum, TX                | -1.71                | 0.29                      | 49.2                  |
| 48503              | Young, TX                 | -0.171               | 34.67                     | 55.32                 |
| 48505              | Zapata, TX                | -1.39                | 0.48                      | 98.95                 |
| 48507              | Zavala, TX                | 0.778                | 95.06                     | 99.87                 |
| 49001              | Beaver, UT                | -1.038               | 1.5                       | 25.22                 |
| 49003              | Box Elder, UT             | -0.518               | 9.49                      | 15.92                 |
| 49005              | Cache, UT                 | -0.346               | 19.61                     | 32.01                 |
| 49007              | Carbon, UT                | -0.12                | 39.67                     | 56.15                 |
| 49009              | Daggett, UT               | -0.462               | 11.88                     | 7.55                  |
| 49011              | Davis, UT                 | -0.584               | 7.2                       | 7.96                  |
| 49013              | Duchesne, UT              | -0.656               | 5.09                      | 48.22                 |
| 49015              | Emery, UT                 | -0.673               | 4.84                      | 26.27                 |
| 49017              | Garfield, UT              | -0.154               | 36.61                     | 45.92                 |
| 49019              | Grand, UT                 | -0.647               | 5.35                      | 52.13                 |
| 49021              | Iron, UT                  | -0.112               | 40.34                     | 45.25                 |
| 49023              | Juab, UT                  | -0.868               | 2.45                      | 23.31                 |
| 49025              | Kane, UT                  | -0.498               | 10.25                     | 10.54                 |
| 49027              | Millard, UT               | -0.689               | 4.39                      | 35.54                 |
| 49029              | Morgan, UT                | -1.056               | 1.4                       | 0.03                  |
| 49031              | Piute, UT                 | -0.179               | 34.07                     | 27.13                 |
| 49033              | Rich, UT                  | -0.777               | 3.34                      | 19.71                 |
| 49035              | Salt Lake, UT             | -0.33                | 20.92                     | 32.29                 |
| 49037              | San Juan, UT              | -0.47                | 11.56                     | 97.52                 |

| <b>County FIPS</b> | <b>County Description</b> | <b>DOS-SVI Index</b> | <b>DOS-SVI Percentile</b> | <b>SVI Percentile</b> |
|--------------------|---------------------------|----------------------|---------------------------|-----------------------|
| 49039              | Sanpete, UT               | -0.425               | 13.85                     | 60.19                 |
| 49041              | Sevier, UT                | -0.283               | 24.8                      | 32.61                 |
| 49043              | Summit, UT                | -0.481               | 11.08                     | 5                     |
| 49045              | Tooele, UT                | -0.404               | 14.96                     | 31.43                 |
| 49047              | Uintah, UT                | -0.545               | 8.69                      | 48.38                 |
| 49049              | Utah, UT                  | -0.772               | 3.44                      | 27.8                  |
| 49051              | Wasatch, UT               | -0.961               | 1.78                      | 6.43                  |
| 49053              | Washington, UT            | -0.821               | 2.77                      | 41.43                 |
| 49055              | Wayne, UT                 | -1.024               | 1.56                      | 29.08                 |
| 49057              | Weber, UT                 | -0.209               | 31.04                     | 42.71                 |
| 50001              | Addison, VT               | 0.012                | 52.98                     | 9.65                  |
| 50003              | Bennington, VT            | 0.089                | 60.97                     | 29.24                 |
| 50005              | Caledonia, VT             | -0.042               | 47.41                     | 26.72                 |
| 50007              | Chittenden, VT            | 0.061                | 58.1                      | 18.31                 |
| 50009              | Essex, VT                 | 0.07                 | 58.96                     | 20.67                 |
| 50011              | Franklin, VT              | -0.247               | 27.73                     | 11.11                 |
| 50013              | Grand Isle, VT            | -0.419               | 14.07                     | 0.25                  |
| 50015              | Lamoille, VT              | -0.127               | 38.84                     | 13.09                 |
| 50017              | Orange, VT                | -0.221               | 30.21                     | 17.2                  |
| 50019              | Orleans, VT               | 0.105                | 62.18                     | 42.58                 |
| 50021              | Rutland, VT               | -0.634               | 5.83                      | 27.87                 |
| 50023              | Washington, VT            | 0.133                | 64.63                     | 17.52                 |
| 50025              | Windham, VT               | -0.002               | 51.48                     | 30.54                 |
| 50027              | Windsor, VT               | -0.257               | 26.9                      | 12.8                  |
| 51001              | Accomack, VA              | 0.124                | 63.9                      | 80.25                 |
| 51003              | Albemarle, VA             | -0.035               | 48.07                     | 17.32                 |
| 51005              | Alleghany, VA             | 0.145                | 66.16                     | 44.62                 |
| 51007              | Amelia, VA                | -0.369               | 17.77                     | 31.66                 |
| 51009              | Amherst, VA               | -0.028               | 48.9                      | 46.82                 |
| 51011              | Appomattox, VA            | 0.03                 | 54.98                     | 36.37                 |
| 51013              | Arlington, VA             | -0.087               | 42.69                     | 14.01                 |
| 51015              | Augusta, VA               | -0.084               | 43.17                     | 14.9                  |
| 51017              | Bath, VA                  | 0.02                 | 53.87                     | 24.71                 |
| 51019              | Bedford, VA               | -0.371               | 17.67                     | 9.84                  |
| 51021              | Bland, VA                 | 0.044                | 56.38                     | 34.49                 |
| 51023              | Botetourt, VA             | -0.386               | 16.27                     | 4.14                  |
| 51025              | Brunswick, VA             | 1.205                | 98.66                     | 89.55                 |
| 51027              | Buchanan, VA              | 0.721                | 94.11                     | 75.45                 |
| 51029              | Buckingham, VA            | 0.745                | 94.52                     | 79.01                 |
| 51031              | Campbell, VA              | 0.016                | 53.39                     | 26.15                 |
| 51033              | Caroline, VA              | -0.044               | 47.12                     | 34.81                 |
| 51035              | Carroll, VA               | 0.008                | 52.53                     | 33.69                 |
| 51036              | Charles City, VA          | -0.157               | 36.13                     | 23.66                 |
| 51037              | Charlotte, VA             | 0.535                | 89.11                     | 70.57                 |
| 51041              | Chesterfield, VA          | -0.094               | 42.18                     | 17.99                 |
| 51043              | Clarke, VA                | -0.147               | 37.19                     | 11.31                 |
| 51045              | Craig, VA                 | -0.344               | 19.8                      | 7.45                  |
| 51047              | Culpeper, VA              | -0.392               | 15.86                     | 48.82                 |
| 51049              | Cumberland, VA            | 0.233                | 73.16                     | 58.31                 |
| 51051              | Dickenson, VA             | 0.447                | 85.51                     | 68.06                 |
| 51053              | Dinwiddie, VA             | 0.17                 | 68.77                     | 41.82                 |
| 51057              | Essex, VA                 | 0.232                | 73.13                     | 56.34                 |
| 51059              | Fairfax, VA               | -0.596               | 6.84                      | 18.76                 |
| 51061              | Fauquier, VA              | -0.425               | 13.82                     | 2.87                  |
| 51063              | Floyd, VA                 | -0.286               | 24.48                     | 11.15                 |



| <b>County FIPS</b> | <b>County Description</b> | <b>DOS-SVI Index</b> | <b>DOS-SVI Percentile</b> | <b>SVI Percentile</b> |
|--------------------|---------------------------|----------------------|---------------------------|-----------------------|
| 51065              | Fluvanna, VA              | -0.28                | 25.09                     | 6.31                  |
| 51067              | Franklin, VA              | -0.059               | 45.72                     | 40.1                  |
| 51069              | Frederick, VA             | -0.375               | 17.1                      | 18.22                 |
| 51071              | Giles, VA                 | 0.148                | 66.57                     | 27.42                 |
| 51073              | Gloucester, VA            | -0.26                | 26.62                     | 3.66                  |
| 51075              | Goochland, VA             | -0.477               | 11.27                     | 4.59                  |
| 51077              | Grayson, VA               | 0.314                | 79.15                     | 64.59                 |
| 51079              | Greene, VA                | -0.481               | 11.05                     | 16.31                 |
| 51081              | Greensville, VA           | 1.313                | 98.95                     | 81.4                  |
| 51083              | Halifax, VA               | 0.084                | 60.55                     | 67.23                 |
| 51085              | Hanover, VA               | -0.374               | 17.35                     | 1.56                  |
| 51087              | Henrico, VA               | 0.051                | 57.34                     | 25.73                 |
| 51089              | Henry, VA                 | 0.139                | 65.36                     | 88.57                 |
| 51091              | Highland, VA              | -0.404               | 14.93                     | 6.5                   |
| 51093              | Isle of Wight, VA         | -0.122               | 39.57                     | 33.92                 |
| 51095              | James City, VA            | -0.382               | 16.59                     | 11.5                  |
| 51097              | King and Queen, VA        | -0.142               | 37.79                     | 32.45                 |
| 51099              | King George, VA           | -0.361               | 18.37                     | 1.59                  |
| 51101              | King William, VA          | -0.236               | 28.81                     | 3.57                  |
| 51103              | Lancaster, VA             | -0.459               | 12.03                     | 15.83                 |
| 51105              | Lee, VA                   | 0.631                | 92.01                     | 80.73                 |
| 51107              | Loudoun, VA               | -0.643               | 5.57                      | 9.04                  |
| 51109              | Louisa, VA                | -0.286               | 24.51                     | 33.25                 |
| 51111              | Lunenburg, VA             | 0.419                | 84.37                     | 86.43                 |
| 51113              | Madison, VA               | -0.647               | 5.41                      | 16.4                  |
| 51115              | Mathews, VA               | -0.508               | 9.96                      | 2.07                  |
| 51117              | Mecklenburg, VA           | 0.334                | 80.26                     | 77.68                 |
| 51119              | Middlesex, VA             | -0.417               | 14.23                     | 20.25                 |
| 51121              | Montgomery, VA            | 0.652                | 92.65                     | 29.59                 |
| 51125              | Nelson, VA                | -0.188               | 33.11                     | 30                    |
| 51127              | New Kent, VA              | -0.489               | 10.76                     | 0.61                  |
| 51131              | Northampton, VA           | 0.208                | 71.41                     | 67.64                 |
| 51133              | Northumberland, VA        | -0.216               | 30.56                     | 12.13                 |
| 51135              | Nottoway, VA              | 0.641                | 92.33                     | 90.96                 |
| 51137              | Orange, VA                | -0.208               | 31.11                     | 46.5                  |
| 51139              | Page, VA                  | 0.011                | 52.82                     | 39.36                 |
| 51141              | Patrick, VA               | -0.031               | 48.62                     | 63.89                 |
| 51143              | Pittsylvania, VA          | 0.138                | 65.23                     | 64.27                 |
| 51145              | Powhatan, VA              | -0.152               | 36.74                     | 0.57                  |
| 51147              | Prince Edward, VA         | 1.14                 | 98.31                     | 72.96                 |
| 51149              | Prince George, VA         | 0.342                | 80.83                     | 31.75                 |
| 51153              | Prince William, VA        | -0.388               | 16.17                     | 30.22                 |
| 51155              | Pulaski, VA               | 0.158                | 67.72                     | 48.31                 |
| 51157              | Rappahannock, VA          | -0.482               | 10.95                     | 2.13                  |
| 51159              | Richmond, VA              | 0.349                | 81.25                     | 61.43                 |
| 51161              | Roanoke, VA               | -0.089               | 42.5                      | 13.12                 |
| 51163              | Rockbridge, VA            | -0.155               | 36.52                     | 14.33                 |
| 51165              | Rockingham, VA            | -0.354               | 18.94                     | 31.97                 |
| 51167              | Russell, VA               | 0.276                | 76.38                     | 44.87                 |
| 51169              | Scott, VA                 | 0.008                | 52.5                      | 67.58                 |
| 51171              | Shenandoah, VA            | -0.146               | 37.38                     | 36.43                 |
| 51173              | Smyth, VA                 | 0.315                | 79.21                     | 75.48                 |
| 51175              | Southampton, VA           | 0.509                | 88.12                     | 47.55                 |
| 51177              | Spotsylvania, VA          | -0.304               | 23.34                     | 21.59                 |
| 51179              | Stafford, VA              | -0.132               | 38.52                     | 15.41                 |

| <b>County FIPS</b> | <b>County Description</b>    | <b>DOS-SVI Index</b> | <b>DOS-SVI Percentile</b> | <b>SVI Percentile</b> |
|--------------------|------------------------------|----------------------|---------------------------|-----------------------|
| 51181              | Surry, VA                    | -0.033               | 48.49                     | 36.59                 |
| 51183              | Sussex, VA                   | 1.685                | 99.68                     | 90.92                 |
| 51185              | Tazewell, VA                 | 0.114                | 63.04                     | 59.36                 |
| 51187              | Warren, VA                   | 0.011                | 52.79                     | 25.64                 |
| 51191              | Washington, VA               | 0.133                | 64.72                     | 36.46                 |
| 51193              | Westmoreland, VA             | -0.32                | 22.03                     | 29.2                  |
| 51195              | Wise, VA                     | 0.77                 | 94.94                     | 85.99                 |
| 51197              | Wythe, VA                    | 0.032                | 55.08                     | 39.65                 |
| 51199              | York, VA                     | -0.146               | 37.31                     | 19.97                 |
| 51510              | Alexandria City, VA          | -0.024               | 49.67                     | 20.03                 |
| 51520              | Bristol City, VA             | 0.872                | 96.31                     | 75.1                  |
| 51530              | Buena Vista City, VA         | 0.781                | 95.1                      | 32.42                 |
| 51540              | Charlottesville City,<br>VA  | 0.655                | 92.81                     | 40.92                 |
| 51550              | Chesapeake City, VA          | 0.154                | 67.37                     | 25.92                 |
| 51570              | Colonial Heights City,<br>VA | 0.24                 | 73.54                     | 56.85                 |
| 51580              | Covington City, VA           | -0.147               | 37.25                     | 46.34                 |
| 51590              | Danville City, VA            | 0.806                | 95.42                     | 95.89                 |
| 51595              | Emporia City, VA             | 1.613                | 99.62                     | 95.67                 |
| 51600              | Fairfax City, VA             | -0.584               | 7.23                      | 24.11                 |
| 51610              | Falls Church City, VA        | -0.49                | 10.66                     | 13.89                 |
| 51620              | Franklin City, VA            | 1.07                 | 97.8                      | 71.75                 |
| 51630              | Fredericksburg City,<br>VA   | 0.739                | 94.43                     | 56.31                 |
| 51640              | Galax City, VA               | 0.737                | 94.36                     | 98.38                 |
| 51650              | Hampton City, VA             | 0.548                | 89.56                     | 66.75                 |
| 51660              | Harrisonburg City, VA        | 1.108                | 98.03                     | 79.3                  |
| 51670              | Hopewell City, VA            | 0.585                | 90.77                     | 94.08                 |
| 51678              | Lexington City, VA           | 2.003                | 99.9                      | 32.26                 |
| 51680              | Lynchburg City, VA           | 1.058                | 97.64                     | 73.69                 |
| 51683              | Manassas City, VA            | -0.253               | 27.22                     | 44.46                 |
| 51685              | Manassas Park City,<br>VA    | 0.189                | 70.26                     | 52.8                  |
| 51690              | Martinsville City, VA        | 1.163                | 98.44                     | 91.05                 |
| 51700              | Newport News City,<br>VA     | 0.636                | 92.14                     | 81.56                 |
| 51710              | Norfolk City, VA             | 1.022                | 97.36                     | 77.17                 |
| 51720              | Norton City, VA              | 1.098                | 97.99                     | 90.54                 |
| 51730              | Petersburg City, VA          | 1.067                | 97.74                     | 96.43                 |
| 51735              | Poquoson City, VA            | -0.331               | 20.89                     | 1.27                  |
| 51740              | Portsmouth City, VA          | 0.665                | 93.06                     | 80.06                 |
| 51750              | Radford City, VA             | 1.696                | 99.75                     | 41.24                 |
| 51760              | Richmond City, VA            | 0.907                | 96.62                     | 77.29                 |
| 51770              | Roanoke City, VA             | 0.627                | 91.85                     | 80.38                 |
| 51775              | Salem City, VA               | 0.501                | 87.93                     | 30.89                 |
| 51790              | Staunton City, VA            | 0.347                | 81.09                     | 44.49                 |
| 51800              | Suffolk City, VA             | 0.097                | 61.54                     | 34.68                 |
| 51810              | Virginia Beach City,<br>VA   | 0.142                | 65.78                     | 18.89                 |
| 51820              | Waynesboro City, VA          | 0.382                | 82.81                     | 60.13                 |
| 51830              | Williamsburg City, VA        | 1.5                  | 99.52                     | 38.5                  |
| 51840              | Winchester City, VA          | 0.244                | 73.99                     | 72.2                  |
| 53001              | Adams, WA                    | -1.135               | 0.96                      | 96.21                 |
| 53003              | Asotin, WA                   | -0.036               | 47.95                     | 42.48                 |

| <b>County FIPS</b> | <b>County Description</b> | <b>DOS-SVI Index</b> | <b>DOS-SVI Percentile</b> | <b>SVI Percentile</b> |
|--------------------|---------------------------|----------------------|---------------------------|-----------------------|
| 53005              | Benton, WA                | -0.273               | 25.5                      | 51.4                  |
| 53007              | Chelan, WA                | -0.344               | 19.74                     | 67.8                  |
| 53009              | Clallam, WA               | -0.156               | 36.36                     | 61.46                 |
| 53011              | Clark, WA                 | -0.38                | 16.71                     | 28.57                 |
| 53013              | Columbia, WA              | -0.316               | 22.32                     | 31.46                 |
| 53015              | Cowlitz, WA               | 0.056                | 57.78                     | 78.85                 |
| 53017              | Douglas, WA               | -0.652               | 5.25                      | 77.07                 |
| 53019              | Ferry, WA                 | -0.157               | 36.23                     | 82.23                 |
| 53021              | Franklin, WA              | -0.78                | 3.25                      | 86.91                 |
| 53023              | Garfield, WA              | -0.281               | 24.86                     | 18.34                 |
| 53025              | Grant, WA                 | -0.718               | 3.88                      | 84.52                 |
| 53027              | Grays Harbor, WA          | 0.167                | 68.55                     | 83.92                 |
| 53029              | Island, WA                | -0.311               | 22.76                     | 18.57                 |
| 53031              | Jefferson, WA             | -0.339               | 19.99                     | 24.14                 |
| 53033              | King, WA                  | -0.359               | 18.69                     | 28.54                 |
| 53035              | Kitsap, WA                | -0.079               | 43.71                     | 28.25                 |
| 53037              | Kittitas, WA              | 0.294                | 77.81                     | 28.31                 |
| 53039              | Klickitat, WA             | -0.685               | 4.55                      | 57.23                 |
| 53041              | Lewis, WA                 | -0.159               | 35.82                     | 78.89                 |
| 53043              | Lincoln, WA               | -0.318               | 22.13                     | 19.84                 |
| 53045              | Mason, WA                 | -0.202               | 31.52                     | 63.82                 |
| 53047              | Okanogan, WA              | -0.02                | 50.14                     | 92.55                 |
| 53049              | Pacific, WA               | 0.094                | 61.29                     | 73.6                  |
| 53051              | Pend Oreille, WA          | -0.439               | 13.09                     | 53.6                  |
| 53053              | Pierce, WA                | -0.057               | 45.91                     | 48.73                 |
| 53055              | San Juan, WA              | -0.788               | 3.12                      | 8.63                  |
| 53057              | Skagit, WA                | -0.673               | 4.81                      | 53.82                 |
| 53059              | Skamania, WA              | -0.4                 | 15.28                     | 21.94                 |
| 53061              | Snohomish, WA             | -0.308               | 23.02                     | 27.55                 |
| 53063              | Spokane, WA               | 0.244                | 74.02                     | 48.25                 |
| 53065              | Stevens, WA               | -0.271               | 25.66                     | 46.15                 |
| 53067              | Thurston, WA              | -0.069               | 44.67                     | 32.99                 |
| 53069              | Wahkiakum, WA             | -0.556               | 8.09                      | 18.09                 |
| 53071              | Walla Walla, WA           | 0.054                | 57.5                      | 68.31                 |
| 53073              | Whatcom, WA               | -0.063               | 45.37                     | 45.41                 |
| 53075              | Whitman, WA               | 1.048                | 97.55                     | 51.08                 |
| 53077              | Yakima, WA                | -0.452               | 12.42                     | 92.77                 |
| 54001              | Barbour, WV               | 0.328                | 79.91                     | 65.13                 |
| 54003              | Berkeley, WV              | -0.014               | 50.72                     | 44.33                 |
| 54005              | Boone, WV                 | 0.288                | 77.4                      | 70.41                 |
| 54007              | Braxton, WV               | 0.024                | 54.16                     | 66.46                 |
| 54009              | Brooke, WV                | 0.015                | 53.2                      | 33.06                 |
| 54011              | Cabell, WV                | 0.597                | 91.09                     | 62.45                 |
| 54013              | Calhoun, WV               | 0.28                 | 76.79                     | 52.39                 |
| 54015              | Clay, WV                  | 0.287                | 77.33                     | 68.85                 |
| 54017              | Doddridge, WV             | 0.107                | 62.37                     | 36.08                 |
| 54019              | Fayette, WV               | 0.405                | 83.92                     | 76.4                  |
| 54021              | Gilmer, WV                | 1.019                | 97.29                     | 75.64                 |
| 54023              | Grant, WV                 | -0.152               | 36.84                     | 36.75                 |
| 54025              | Greenbrier, WV            | 0.094                | 61.32                     | 55.57                 |
| 54027              | Hampshire, WV             | 0.159                | 67.88                     | 64.33                 |
| 54029              | Hancock, WV               | 0.02                 | 53.9                      | 40.51                 |
| 54031              | Hardy, WV                 | -0.097               | 41.96                     | 28.5                  |
| 54033              | Harrison, WV              | -0.069               | 44.7                      | 40.89                 |
| 54035              | Jackson, WV               | -0.267               | 26.07                     | 25.29                 |

| <b>County FIPS</b> | <b>County Description</b> | <b>DOS-SVI Index</b> | <b>DOS-SVI Percentile</b> | <b>SVI Percentile</b> |
|--------------------|---------------------------|----------------------|---------------------------|-----------------------|
| 54037              | Jefferson, WV             | -0.215               | 30.63                     | 22.55                 |
| 54039              | Kanawha, WV               | 0.269                | 75.74                     | 56.56                 |
| 54041              | Lewis, WV                 | 0.144                | 66.09                     | 67.61                 |
| 54043              | Lincoln, WV               | 0.027                | 54.47                     | 60.57                 |
| 54045              | Logan, WV                 | 0.466                | 86.44                     | 74.71                 |
| 54047              | McDowell, WV              | 0.861                | 96.08                     | 90.29                 |
| 54049              | Marion, WV                | 0.078                | 59.76                     | 49.39                 |
| 54051              | Marshall, WV              | -0.078               | 43.81                     | 21.53                 |
| 54053              | Mason, WV                 | -0.034               | 48.27                     | 54.97                 |
| 54055              | Mercer, WV                | 0.525                | 88.57                     | 80.89                 |
| 54057              | Mineral, WV               | 0.339                | 80.55                     | 59.33                 |
| 54059              | Mingo, WV                 | 0.574                | 90.39                     | 78.5                  |
| 54061              | Monongalia, WV            | 0.228                | 72.91                     | 41.11                 |
| 54063              | Monroe, WV                | 0.066                | 58.61                     | 46.62                 |
| 54065              | Morgan, WV                | -0.639               | 5.7                       | 17.64                 |
| 54067              | Nicholas, WV              | 0.002                | 51.93                     | 54.11                 |
| 54069              | Ohio, WV                  | 0.134                | 64.79                     | 31.08                 |
| 54071              | Pendleton, WV             | 0.003                | 52.02                     | 35.8                  |
| 54073              | Pleasants, WV             | 0.419                | 84.34                     | 44.68                 |
| 54075              | Pocahontas, WV            | 0.33                 | 80.01                     | 49.71                 |
| 54077              | Preston, WV               | 0.1                  | 61.89                     | 57.32                 |
| 54079              | Putnam, WV                | -0.295               | 23.91                     | 4.08                  |
| 54081              | Raleigh, WV               | 0.339                | 80.61                     | 76.85                 |
| 54083              | Randolph, WV              | 0.356                | 81.6                      | 58.06                 |
| 54085              | Ritchie, WV               | 0.098                | 61.67                     | 36.4                  |
| 54087              | Roane, WV                 | 0.167                | 68.58                     | 64.65                 |
| 54089              | Summers, WV               | 0.633                | 92.04                     | 82.9                  |
| 54091              | Taylor, WV                | 0.261                | 75.26                     | 49.49                 |
| 54093              | Tucker, WV                | 0.152                | 67.21                     | 36.72                 |
| 54095              | Tyler, WV                 | -0.002               | 51.64                     | 22.13                 |
| 54097              | Upshur, WV                | 0.444                | 85.45                     | 69.11                 |
| 54099              | Wayne, WV                 | 0.278                | 76.6                      | 60.06                 |
| 54101              | Webster, WV               | 0.676                | 93.35                     | 74.87                 |
| 54103              | Wetzel, WV                | 0.29                 | 77.52                     | 47.52                 |
| 54105              | Wirt, WV                  | 0.277                | 76.44                     | 37.48                 |
| 54107              | Wood, WV                  | 0.142                | 65.84                     | 37.23                 |
| 54109              | Wyoming, WV               | 0.254                | 74.69                     | 64.43                 |
| 55001              | Adams, WI                 | -0.028               | 48.93                     | 56.85                 |
| 55003              | Ashland, WI               | 0.149                | 66.89                     | 55                    |
| 55005              | Barron, WI                | -0.226               | 29.61                     | 32.71                 |
| 55007              | Bayfield, WI              | -0.345               | 19.64                     | 9.9                   |
| 55009              | Brown, WI                 | -0.014               | 50.68                     | 32.99                 |
| 55011              | Buffalo, WI               | -0.283               | 24.77                     | 5.76                  |
| 55013              | Burnett, WI               | -0.068               | 44.92                     | 16.72                 |
| 55015              | Calumet, WI               | -0.373               | 17.38                     | 1.82                  |
| 55017              | Chippewa, WI              | -0.023               | 49.7                      | 21.05                 |
| 55019              | Clark, WI                 | -0.656               | 5.06                      | 53.5                  |
| 55021              | Columbia, WI              | -0.175               | 34.35                     | 12.04                 |
| 55023              | Crawford, WI              | -0.069               | 44.76                     | 39.71                 |
| 55025              | Dane, WI                  | 0.072                | 59.28                     | 16.88                 |
| 55027              | Dodge, WI                 | 0.08                 | 60.08                     | 20.19                 |
| 55029              | Door, WI                  | -0.339               | 20.02                     | 5.57                  |
| 55031              | Douglas, WI               | 0.109                | 62.46                     | 27.48                 |
| 55033              | Dunn, WI                  | 0.112                | 62.85                     | 18.47                 |
| 55035              | Eau Claire, WI            | 0.071                | 59.25                     | 21.75                 |

| <b>County FIPS</b> | <b>County Description</b> | <b>DOS-SVI Index</b> | <b>DOS-SVI Percentile</b> | <b>SVI Percentile</b> |
|--------------------|---------------------------|----------------------|---------------------------|-----------------------|
| 55037              | Florence, WI              | -0.494               | 10.51                     | 14.52                 |
| 55039              | Fond du Lac, WI           | -0.112               | 40.37                     | 20.38                 |
| 55041              | Forest, WI                | 0.176                | 69.31                     | 57.74                 |
| 55043              | Grant, WI                 | 0.11                 | 62.72                     | 19.39                 |
| 55045              | Green, WI                 | -0.177               | 34.19                     | 5.29                  |
| 55047              | Green Lake, WI            | -0.379               | 16.84                     | 28.69                 |
| 55049              | Iowa, WI                  | -0.361               | 18.4                      | 1.31                  |
| 55051              | Iron, WI                  | -0.029               | 48.84                     | 36.02                 |
| 55053              | Jackson, WI               | -0.029               | 48.81                     | 50.03                 |
| 55055              | Jefferson, WI             | -0.062               | 45.46                     | 18.54                 |
| 55057              | Juneau, WI                | 0.034                | 55.24                     | 37.8                  |
| 55059              | Kenosha, WI               | 0.272                | 76.03                     | 51.11                 |
| 55061              | Kewaunee, WI              | -0.415               | 14.36                     | 5.86                  |
| 55063              | La Crosse, WI             | 0.081                | 60.2                      | 20.89                 |
| 55065              | Lafayette, WI             | -0.295               | 23.88                     | 15.96                 |
| 55067              | Langlade, WI              | 0.065                | 58.48                     | 35.35                 |
| 55069              | Lincoln, WI               | -0.099               | 41.8                      | 10.13                 |
| 55071              | Manitowoc, WI             | -0.152               | 36.87                     | 16.21                 |
| 55073              | Marathon, WI              | -0.4                 | 15.35                     | 14.43                 |
| 55075              | Marinette, WI             | 0.016                | 53.26                     | 29.71                 |
| 55077              | Marquette, WI             | -0.257               | 26.87                     | 25.96                 |
| 55078              | Menominee, WI             | 0.411                | 84.11                     | 76.72                 |
| 55079              | Milwaukee, WI             | 0.604                | 91.31                     | 80.61                 |
| 55081              | Monroe, WI                | -0.074               | 44.28                     | 46.21                 |
| 55083              | Oconto, WI                | -0.338               | 20.06                     | 6.4                   |
| 55085              | Oneida, WI                | -0.35                | 19.32                     | 1.4                   |
| 55087              | Outagamie, WI             | -0.185               | 33.46                     | 9.78                  |
| 55089              | Ozaukee, WI               | -0.491               | 10.6                      | 1.34                  |
| 55091              | Pepin, WI                 | -0.156               | 36.39                     | 10.19                 |
| 55093              | Pierce, WI                | 0                    | 51.83                     | 8.06                  |
| 55095              | Polk, WI                  | -0.125               | 39.22                     | 8.73                  |
| 55097              | Portage, WI               | 0.056                | 57.69                     | 16.53                 |
| 55099              | Price, WI                 | -0.228               | 29.51                     | 16.02                 |
| 55101              | Racine, WI                | 0.318                | 79.34                     | 45.51                 |
| 55103              | Richland, WI              | -0.122               | 39.54                     | 30.73                 |
| 55105              | Rock, WI                  | 0.224                | 72.78                     | 45.61                 |
| 55107              | Rusk, WI                  | -0.104               | 41.13                     | 34.65                 |
| 55109              | St. Croix, WI             | -0.379               | 16.87                     | 1.46                  |
| 55111              | Sauk, WI                  | -0.135               | 38.3                      | 23.44                 |
| 55113              | Sawyer, WI                | -0.036               | 48.01                     | 42.68                 |
| 55115              | Shawano, WI               | -0.231               | 29.23                     | 13.82                 |
| 55117              | Sheboygan, WI             | -0.207               | 31.26                     | 22.45                 |
| 55119              | Taylor, WI                | -0.291               | 24.1                      | 20                    |
| 55121              | Trempealeau, WI           | -0.334               | 20.54                     | 28.12                 |
| 55123              | Vernon, WI                | -0.539               | 8.85                      | 38.34                 |
| 55125              | Vilas, WI                 | -0.163               | 35.47                     | 13.95                 |
| 55127              | Walworth, WI              | -0.054               | 46.13                     | 26.88                 |
| 55129              | Washburn, WI              | -0.236               | 28.84                     | 10.8                  |
| 55131              | Washington, WI            | -0.293               | 23.94                     | 0.99                  |
| 55133              | Waukesha, WI              | -0.468               | 11.62                     | 1.94                  |
| 55135              | Waupaca, WI               | -0.025               | 49.41                     | 18.15                 |
| 55137              | Waushara, WI              | -0.141               | 38.05                     | 36.53                 |
| 55139              | Winnebago, WI             | 0.186                | 70.17                     | 16.08                 |
| 55141              | Wood, WI                  | -0.07                | 44.6                      | 15.35                 |
| 56001              | Albany, WY                | 0.212                | 71.86                     | 24.94                 |

| <b>County FIPS</b> | <b>County Description</b> | <b>DOS-SVI Index</b> | <b>DOS-SVI Percentile</b> | <b>SVI Percentile</b> |
|--------------------|---------------------------|----------------------|---------------------------|-----------------------|
| 56003              | Big Horn, WY              | -0.43                | 13.47                     | 39.55                 |
| 56005              | Campbell, WY              | -0.327               | 21.33                     | 33.15                 |
| 56007              | Carbon, WY                | -0.158               | 35.94                     | 50.29                 |
| 56009              | Converse, WY              | -0.558               | 8.05                      | 20.48                 |
| 56011              | Crook, WY                 | -0.911               | 2.04                      | 3.28                  |
| 56013              | Fremont, WY               | -0.333               | 20.63                     | 56.24                 |
| 56015              | Goshen, WY                | 0.024                | 54.25                     | 32.64                 |
| 56017              | Hot Springs, WY           | -0.391               | 15.98                     | 12.29                 |
| 56019              | Johnson, WY               | -0.254               | 27.16                     | 17.74                 |
| 56021              | Laramie, WY               | -0.084               | 43.08                     | 26.97                 |
| 56023              | Lincoln, WY               | -0.587               | 7.16                      | 8.09                  |
| 56025              | Natrona, WY               | 0.04                 | 55.94                     | 29.52                 |
| 56027              | Niobrara, WY              | 0.266                | 75.58                     | 33.6                  |
| 56029              | Park, WY                  | -0.435               | 13.28                     | 6.59                  |
| 56031              | Platte, WY                | -0.174               | 34.48                     | 9.52                  |
| 56033              | Sheridan, WY              | -0.344               | 19.77                     | 8.95                  |
| 56035              | Sublette, WY              | -0.303               | 23.37                     | 2.93                  |
| 56037              | Sweetwater, WY            | -0.082               | 43.39                     | 37.01                 |
| 56039              | Teton, WY                 | -1.201               | 0.73                      | 11.27                 |
| 56041              | Uinta, WY                 | -0.429               | 13.56                     | 45.22                 |
| 56043              | Washakie, WY              | -0.285               | 24.67                     | 37.32                 |
| 56045              | Weston, WY                | -0.124               | 39.32                     | 34.75                 |
